# Supplementary material for: Pooled genome-wide CRISPR activation screening for rapamycin resistance genes in Drosophila cells
Source: eLife journal article supplement (doi:10.7554/elife.85542), 2023-04-10
Supplement: fig1-data1 [file Figure 1 Source Data.xlsx]

## Sheet: 1B
	blank	sgJon25Biii	blank+Cu2+	sgJon25Biii+Cu2+	empty vector	sgSdr vector	empty vector+Cu2+	sgSdr vector+Cu2+
biological rep1	0.765278	2.81256	1.81935	18.1001	1.02089	5.55444	0.971623	22.5806
biological rep2	1.13734	4.14643	2.43673	21.6148	1.06329	4.68093	0.912054	22.1264
biological rep3	1.14892	3.55813	1.78971	21.366	0.921236	5.98424	0.915206	22.1365
Unpaired t test		sgJon25Biii vs. blank	blank+Cu2+ vs. blank	sgJon25Biii+Cu2+ vs. blank		sgSdr vector vs. empty vector	empty vector+Cu2+ vs. empty vector	sgSdr vector+Cu2+ vs. empty vector
p value		0.0036	0.0153	<0.0001		0.0003	0.2115	<0.0001

## Sheet: 1C
CG9877 expression				CG13538 expression
	lib8	lib8-CG9877			lib8	lib8-CG9877
biological rep1	1.40136	39.7016		biological rep1	1.07938	1.67975
biological rep2	0.508247	41.9027		biological rep2	0.466221	2.81937
biological rep3	1.40403	43.1017		biological rep3	1.98716	1.58671
Unpaired t test		lib8-CG9877 vs. lib8		Unpaired t test		lib8-CG9877 vs. lib8
p value		<0.0001		p value		0.2249
