# Supplementary material for: Pooled genome-wide CRISPR activation screening for rapamycin resistance genes in Drosophila cells
Source: eLife journal article supplement (doi:10.7554/elife.85542), 2023-04-10
Supplement: fig2-data1 [file Figure 2 Source Data.xlsx]

## Sheet: 2B rep1
id	num	neg|score	neg|p-value	neg|fdr	neg|rank	neg|goodsgrna	neg|lfc	pos|score	pos|p-value	pos|fdr	pos|rank	pos|goodsgrna	pos|lfc
FBgn0033913	6	1	1	1	15627	0	2.2775	3.7005e-11	3.1679e-07	0.00165	1	6	2.2775
FBgn0038353	6	0.85482	0.8589	0.993146	13419	1	1.7289	8.1111e-08	3.1679e-07	0.00165	2	5	1.7289
FBgn0263336	4	1	1	1	15626	0	1.6195	9.9811e-08	3.1679e-07	0.00165	3	4	1.6195
FBgn0085488	6	0.91634	0.91601	0.99903	14316	0	0.8926	4.034e-07	1.584e-06	0.00495	4	4	0.8926
FBgn0262160	6	0.64366	0.74754	0.992082	11333	1	0.95303	4.4529e-07	1.584e-06	0.00495	5	4	0.95303
FBgn0038595	6	0.93896	0.93886	0.999097	14681	0	0.76944	9.2106e-06	3.7698e-05	0.098185	6	3	0.76944
FBgn0005624	6	0.7832	0.81116	0.993146	12518	1	1.4335	2.2367e-05	0.00010676	0.238331	7	5	1.4335
FBgn0026084	8	0.25638	0.47504	0.990562	6676	2	0.61104	2.3156e-05	0.00017012	0.322882	8	6	0.61104
FBgn0264711	6	0.9038	0.90356	0.993146	14137	0	0.47052	3.5655e-05	0.00018596	0.322882	9	4	0.47052
FBgn0038412	5	0.85788	0.85814	0.993146	13478	0	0.58986	4.5174e-05	0.00021573	0.337129	10	4	0.58986
FBgn0085332	6	0.94873	0.94858	0.999097	14817	0	0.74651	8.6632e-05	0.00045966	0.469472	11	5	0.74651
FBgn0037994	4	0.52194	0.58545	0.991024	10066	1	1.0524	9.2372e-05	0.00033612	0.437706	12	2	1.0524
FBgn0040850	6	0.8527	0.85724	0.993146	13386	1	0.97513	9.3122e-05	0.00050148	0.469472	13	4	0.97513
FBgn0051105	6	0.0017459	0.0079892	0.91437	110	2	0.75003	9.596e-05	0.00051922	0.469472	14	3	0.75003
FBgn0052105	6	0.71586	0.77722	0.992082	11926	1	0.71239	9.9699e-05	0.00053696	0.469472	15	4	0.71239
FBgn0039936	5	0.92909	0.9293	0.999097	14531	0	0.98037	0.00010422	0.00049388	0.469472	16	3	0.98037
FBgn0003733	6	0.99198	0.99202	0.999178	15515	0	0.90187	0.00011199	0.00060666	0.479455	17	5	0.90187
FBgn0041710	6	0.87987	0.88018	0.993146	13783	1	0.19995	0.00012264	0.00066494	0.494814	18	3	0.19995
FBgn0030834	6	0.96954	0.96965	0.999097	15127	0	0.69219	0.00013828	0.00074984	0.532628	19	5	0.69219
FBgn0267017	4	0.99985	0.99986	1	15624	0	0.84842	0.00014517	0.00054076	0.469472	20	4	0.84842
FBgn0267827	4	0.2444	0.3708	0.990467	6446	1	1.1381	0.00016638	0.00061362	0.479455	21	3	1.1381
FBgn0000489	6	0.56983	0.70683	0.992082	10638	2	0.18215	0.00017827	0.00098617	0.64212	22	3	0.18215
FBgn0000337	6	0.29581	0.48629	0.990562	7272	1	1.0272	0.00018886	0.0010464	0.654059	23	4	1.0272
FBgn0032658	5	0.92698	0.92723	0.999097	14505	0	1.2908	0.00021443	0.000983	0.64212	24	4	1.2908
FBgn0050345	6	0.9402	0.9401	0.999097	14698	0	0.68656	0.00022849	0.0012554	0.726623	25	5	0.68656
FBgn0001986	1	0.99973	0.99975	1	15623	0	3.8601	0.00026742	0.00026389	0.374887	26	1	3.8601
FBgn0034387	6	0.95855	0.95855	0.999097	14967	0	0.18909	0.00028669	0.0015672	0.790003	27	2	0.18909
FBgn0266836	4	0.99966	0.99968	0.999996	15622	0	0.66825	0.00033891	0.0012187	0.726623	28	4	0.66825
FBgn0028740	6	0.99963	0.99965	0.999996	15621	0	0.65543	0.00037126	0.0020252	0.870427	29	6	0.65543
FBgn0037835	6	0.99962	0.99963	0.999996	15620	0	0.68602	0.00038342	0.0020892	0.870427	30	6	0.68602
FBgn0037191	6	0.55702	0.69581	0.992082	10509	1	0.58361	0.00039215	0.0021393	0.870427	31	4	0.58361
FBgn0052099	6	0.43573	0.5955	0.991024	9043	1	0.64507	0.00039986	0.0021722	0.870427	32	3	0.64507
FBgn0085279	6	0.9996	0.99962	0.999996	15619	0	0.85343	0.00040099	0.0021754	0.870427	33	6	0.85343
FBgn0266388	4	0.79005	0.78951	0.992082	12602	0	0.48284	0.00040404	0.0014424	0.764191	34	3	0.48284
FBgn0037822	4	0.79005	0.78951	0.992082	12572	0	1.1452	0.0004108	0.0014671	0.764191	35	3	1.1452
FBgn0028583	6	0.21236	0.39024	0.990467	5818	2	1.3355	0.00043592	0.002356	0.870427	36	4	1.3355
FBgn0004511	6	0.97886	0.97892	0.999097	15291	0	0.8054	0.00044413	0.0023984	0.870427	37	5	0.8054
FBgn0037818	6	0.54402	0.68477	0.992082	10354	2	0.36445	0.00045434	0.0024548	0.870427	38	3	0.36445
FBgn0262544	6	0.67288	0.759	0.992082	11555	1	1.0683	0.00050375	0.0026886	0.870427	39	4	1.0683
FBgn0266973	4	0.99949	0.99949	0.999996	15618	0	1.1432	0.00051073	0.0018238	0.870427	40	4	1.1432
FBgn0261552	14	0.76195	0.90671	0.995337	12363	2	0.44249	0.00051624	0.0039672	0.870427	41	9	0.44249
FBgn0262482	6	0.99125	0.99125	0.999097	15505	0	0.91067	0.00052854	0.0028046	0.870427	42	5	0.91067
FBgn0003525	6	0.9038	0.90356	0.993146	14052	0	0.86169	0.00053492	0.0028419	0.870427	43	5	0.86169
FBgn0263929	7	0.50493	0.67089	0.991846	9862	2	0.68951	0.00054065	0.0030181	0.870427	44	4	0.68951
FBgn0267730	4	0.99942	0.99943	0.999996	15617	0	0.71937	0.00057749	0.0020759	0.870427	45	4	0.71937
FBgn0265379	4	0.35846	0.49888	0.990562	8129	2	0.027007	0.00059413	0.0021317	0.870427	46	2	0.027007
FBgn0026616	6	0.9651	0.96517	0.999097	15051	0	0.65849	0.00061574	0.0032753	0.870427	47	4	0.65849
FBgn0020653	6	0.99934	0.99936	0.999996	15616	0	0.52947	0.00065602	0.0034723	0.870427	48	6	0.52947
FBgn0053270	6	0.95009	0.94996	0.999097	14840	0	0.83754	0.00069517	0.0036605	0.870427	49	4	0.83754
FBgn0013548	6	0.76853	0.80316	0.993146	12424	1	0.81522	0.00070817	0.0037264	0.870427	50	5	0.81522
FBgn0038695	6	0.98622	0.98625	0.999097	15413	0	0.5461	0.00070817	0.0037264	0.870427	51	5	0.5461
FBgn0036299	4	0.99926	0.99926	0.999996	15615	0	0.623	0.00073741	0.0026424	0.870427	52	4	0.623
FBgn0038151	6	0.97738	0.97746	0.999097	15267	0	0.88501	0.00073879	0.0038728	0.870427	53	4	0.88501
FBgn0016053	2	0.99926	0.99922	0.999996	15614	0	1.7821	0.00074369	0.0013891	0.764191	54	2	1.7821
FBgn0034214	5	0.65268	0.70738	0.992082	11406	1	0.11085	0.00074684	0.0033951	0.870427	55	2	0.11085
FBgn0036176	6	0.81609	0.83125	0.993146	12938	1	0.88862	0.00074717	0.003919	0.870427	56	5	0.88862
FBgn0035945	6	0.15473	0.31121	0.990467	4639	2	0.29658	0.00076174	0.0039836	0.870427	57	3	0.29658
FBgn0022702	4	0.6047	0.63627	0.991024	11021	1	0.23297	0.00078419	0.0028014	0.870427	58	2	0.23297
FBgn0263864	3	0.3737	0.43363	0.990467	8326	1	2.2675	0.00080976	0.0023477	0.870427	59	2	2.2675
FBgn0037275	6	0.95069	0.95056	0.999097	14852	0	0.2168	0.0008198	0.004277	0.870427	60	2	0.2168
FBgn0034763	6	0.96828	0.96838	0.999097	15108	0	0.71122	0.0008205	0.0042808	0.870427	61	5	0.71122
FBgn0031036	6	0.26165	0.45544	0.990467	6782	2	0.66882	0.0008437	0.0043879	0.870427	62	4	0.66882
FBgn0031659	6	0.99915	0.99917	0.999996	15613	0	0.41949	0.00084661	0.0044005	0.870427	63	6	0.41949
FBgn0036805	6	0.99915	0.99917	0.999996	15612	0	0.7184	0.00084661	0.0044005	0.870427	64	6	0.7184
FBgn0265798	4	0.99418	0.99422	0.999719	15541	0	1.5555	0.0008617	0.0030846	0.870427	65	4	1.5555
FBgn0051028	6	0.99887	0.99885	0.999996	15606	0	0.75501	0.00087888	0.0045564	0.870427	66	5	0.75501
FBgn0025629	6	0.57731	0.71336	0.992082	10739	2	0.41786	0.00089793	0.0046559	0.870427	67	3	0.41786
FBgn0040529	4	0.56722	0.61231	0.991024	10607	1	0.59079	0.00093551	0.0033488	0.870427	68	2	0.59079
FBgn0036806	6	0.99906	0.99907	0.999996	15611	0	0.30102	0.00093726	0.0048352	0.870427	69	6	0.30102
FBgn0266163	6	0.76449	0.801	0.993146	12385	1	0.7746	0.00094851	0.0048894	0.870427	70	4	0.7746
FBgn0031650	6	0.073149	0.19033	0.990467	2782	1	0.65058	0.00094864	0.0048903	0.870427	71	3	0.65058
FBgn0036790	6	0.050503	0.13982	0.990467	2049	4	-0.59381	0.00096232	0.0049644	0.870427	72	1	-0.59381
FBgn0050359	6	0.9538	0.95373	0.999097	14895	0	0.72495	0.00096773	0.0049898	0.870427	73	5	0.72495
FBgn0037151	6	0.50422	0.65119	0.991098	9854	1	0.8465	0.00097035	0.0050024	0.870427	74	5	0.8465
FBgn0265812	4	0.85932	0.85897	0.993146	13504	0	1.1002	0.00099752	0.003556	0.870427	75	3	1.1002
FBgn0034909	6	0.9038	0.90356	0.993146	14056	0	0.30222	0.0010026	0.0051843	0.870427	76	3	0.30222
FBgn0013576	24	0.73438	0.9338	0.999097	12085	3	0.12294	0.0010252	0.0088502	0.870427	77	9	0.12294
FBgn0038057	4	0.99897	0.99895	0.999996	15610	0	1.4234	0.0010262	0.0036656	0.870427	78	4	1.4234
FBgn0262689	4	0.56445	0.61064	0.991024	10577	1	0.82734	0.0010265	0.0036662	0.870427	79	3	0.82734
FBgn0263246	6	0.98863	0.98865	0.999097	15458	0	0.38571	0.0010371	0.0053484	0.870427	80	3	0.38571
FBgn0267472	4	0.8697	0.86929	0.993146	13641	0	0.98266	0.0010453	0.0037429	0.870427	81	3	0.98266
FBgn0266182	4	0.99893	0.99891	0.999996	15608	0	0.9361	0.001067	0.0038196	0.870427	82	4	0.9361
FBgn0030239	5	0.9989	0.99892	0.999996	15607	0	0.62378	0.0010965	0.0049518	0.870427	83	5	0.62378
FBgn0259789	5	0.96478	0.96495	0.999097	15048	0	1.1005	0.0011162	0.0050449	0.870427	84	4	1.1005
FBgn0054034	6	0.12175	0.26461	0.990467	3920	2	0.86769	0.0011354	0.0057171	0.870427	85	4	0.86769
FBgn0029603	6	0.16512	0.32565	0.990467	4841	1	0.0071141	0.001147	0.0057631	0.870427	86	2	0.0071141
FBgn0250868	6	0.10247	0.23656	0.990467	3509	1	0.99706	0.0011559	0.0058071	0.870427	87	5	0.99706
FBgn0085451	4	0.99884	0.99881	0.999996	15605	0	0.80198	0.0011571	0.0041585	0.870427	88	4	0.80198
FBgn0027348	6	0.99411	0.9941	0.999665	15540	0	1.142	0.0011592	0.0058198	0.870427	89	5	1.142
FBgn0032482	4	0.50872	0.57791	0.990867	9912	1	-0.084565	0.0011642	0.0041915	0.870427	90	1	-0.084565
FBgn0030989	6	0.57	0.70698	0.992082	10641	2	0.58436	0.0011796	0.0059085	0.870427	91	4	0.58436
FBgn0264305	6	0.1012	0.23469	0.990467	3486	1	0.43859	0.0011826	0.0059161	0.870427	92	3	0.43859
FBgn0265042	14	0.99999	0.99999	1	15625	0	0.5071	0.0011876	0.0082844	0.870427	93	10	0.5071
FBgn0262612	6	0.86952	0.87109	0.993146	13636	1	0.36271	0.0012	0.005987	0.870427	94	3	0.36271
FBgn0031817	6	0.58952	0.724	0.992082	10893	2	0.66908	0.0012147	0.0060415	0.870427	95	4	0.66908
FBgn0034755	6	0.39728	0.56478	0.990867	8613	2	0.39344	0.0012354	0.006129	0.870427	96	3	0.39344
FBgn0037167	6	0.83823	0.84658	0.993146	13223	1	1.0091	0.0012472	0.0061784	0.870427	97	5	1.0091
FBgn0013755	6	0.9797	0.97971	0.999097	15303	0	0.81078	0.0012472	0.0061784	0.870427	98	5	0.81078
FBgn0035359	6	0.81609	0.83125	0.993146	12936	1	0.27393	0.0012473	0.006179	0.870427	99	3	0.27393
FBgn0025642	6	0.46279	0.61726	0.991024	9357	2	0.78158	0.0013378	0.006544	0.870427	100	4	0.78158
FBgn0021979	14	0.30543	0.59654	0.991024	7398	3	-0.11145	0.0013436	0.0092601	0.870427	101	5	-0.11145
FBgn0267786	4	0.54452	0.59854	0.991024	10363	1	1.0813	0.0013757	0.004934	0.870427	102	3	1.0813
FBgn0033834	6	0.92026	0.91993	0.99903	14394	0	0.11529	0.0013898	0.006741	0.870427	103	3	0.11529
FBgn0037265	6	0.97301	0.97306	0.999097	15186	0	0.70973	0.0013907	0.0067467	0.870427	104	5	0.70973
FBgn0264720	4	0.97421	0.974	0.999097	15203	0	0.85601	0.0014008	0.005017	0.870427	105	3	0.85601
FBgn0265449	4	0.021109	0.057356	0.987	1012	3	-0.53349	0.0014017	0.0050196	0.870427	106	1	-0.53349
FBgn0038484	5	0.99347	0.9935	0.999449	15533	0	0.9549	0.0014277	0.0063165	0.870427	107	4	0.9549
FBgn0260934	8	0.1334	0.30935	0.990467	4157	2	0.51344	0.0014564	0.0081273	0.870427	108	5	0.51344
FBgn0036804	6	0.9038	0.90356	0.993146	14165	0	0.21307	0.001461	0.00704	0.870427	109	3	0.21307
FBgn0017558	6	0.052783	0.14504	0.990467	2126	2	0.53838	0.0015614	0.0074462	0.870427	110	3	0.53838
FBgn0026181	4	0.036176	0.089553	0.987	1578	1	0.2019	0.0015679	0.005617	0.870427	111	1	0.2019
FBgn0067783	4	0.99843	0.99842	0.999996	15600	0	0.93747	0.0015743	0.0056468	0.870427	112	4	0.93747
FBgn0265574	5	0.25711	0.41171	0.990467	6684	2	0.76785	0.0015786	0.006971	0.870427	113	3	0.76785
FBgn0038425	6	0.17238	0.33577	0.990467	5000	2	1.0156	0.0015914	0.0075558	0.870427	114	4	1.0156
FBgn0003710	4	0.84278	0.84229	0.993146	13274	0	1.6094	0.0016017	0.005726	0.870427	115	3	1.6094
FBgn0051897	5	0.8217	0.823	0.993146	12999	1	0.833	0.0016232	0.0071592	0.870427	116	4	0.833
FBgn0050418	5	0.27702	0.43043	0.990467	7012	2	1.486	0.001661	0.0073169	0.870427	117	3	1.486
FBgn0032052	6	0.034022	0.10129	0.987	1509	2	0.091087	0.0016624	0.0078282	0.870427	118	3	0.091087
FBgn0026252	6	0.47136	0.62416	0.991024	9449	2	-0.085411	0.0016746	0.007884	0.870427	119	2	-0.085411
FBgn0266005	4	0.69168	0.69949	0.992082	11714	1	1.05	0.0016872	0.0060289	0.870427	120	3	1.05
FBgn0265377	4	0.21284	0.33543	0.990467	5827	2	0.45869	0.0017341	0.0062069	0.870427	121	2	0.45869
FBgn0024734	8	0.69557	0.81456	0.993146	11751	1	0.58752	0.0017528	0.009632	0.872283	122	6	0.58752
FBgn0001142	6	0.75888	0.79803	0.993146	12336	1	0.74114	0.0017586	0.0081843	0.870427	123	4	0.74114
FBgn0050373	4	0.83189	0.83138	0.993146	13139	0	0.80701	0.0018048	0.0064622	0.870427	124	3	0.80701
FBgn0039321	6	0.85197	0.85667	0.993146	13375	1	0.74708	0.001809	0.0083915	0.870427	125	3	0.74708
FBgn0264562	6	0.9038	0.90356	0.993146	14001	0	0.26494	0.0018171	0.0084238	0.870427	126	3	0.26494
FBgn0029987	6	0.11427	0.25386	0.990467	3780	2	1.1363	0.0018461	0.0085423	0.870427	127	4	1.1363
FBgn0011291	4	0.99673	0.99674	0.999996	15574	0	0.52514	0.0018534	0.0066365	0.870427	128	4	0.52514
FBgn0034128	6	0.10179	0.23552	0.990467	3491	3	-0.537	0.0018612	0.0085999	0.870427	129	2	-0.537
FBgn0027841	6	0.86179	0.86456	0.993146	13539	1	0.082677	0.0018612	0.0085999	0.870427	130	3	0.082677
FBgn0037700	6	0.58251	0.71787	0.992082	10799	1	-0.03121	0.0018612	0.0085999	0.870427	131	2	-0.03121
FBgn0025866	4	0.94386	0.94364	0.999097	14747	0	1.1463	0.0018673	0.0066846	0.870427	132	3	1.1463
FBgn0033469	6	0.81202	0.82868	0.993146	12886	1	0.61392	0.0018708	0.0086348	0.870427	133	4	0.61392
FBgn0263327	4	0.024143	0.063932	0.987	1119	1	0.041674	0.0018765	0.0067131	0.870427	134	1	0.041674
FBgn0035405	4	0.99809	0.9981	0.999996	15594	0	0.76579	0.0019107	0.0068335	0.870427	135	4	0.76579
FBgn0036601	6	0.35305	0.53005	0.990562	8044	1	0.6895	0.0019144	0.0088134	0.870427	136	5	0.6895
FBgn0032609	4	0.8316	0.83108	0.993146	13133	0	0.63859	0.001918	0.006862	0.870427	137	3	0.63859
FBgn0052708	6	0.070681	0.18501	0.990467	2699	2	0.16869	0.0019257	0.0088648	0.870427	138	3	0.16869
FBgn0264818	4	0.99564	0.99566	0.999996	15555	0	0.94066	0.0019305	0.0069083	0.870427	139	4	0.94066
FBgn0005616	6	0.76524	0.80139	0.993146	12392	1	0.24701	0.0019354	0.0089066	0.870427	140	3	0.24701
FBgn0267644	4	0.99806	0.99806	0.999996	15593	0	0.88742	0.0019409	0.0069425	0.870427	141	4	0.88742
FBgn0029930	6	0.98329	0.9833	0.999097	15355	0	0.5806	0.0019498	0.0089668	0.870427	142	5	0.5806
FBgn0053985	6	0.98634	0.98637	0.999097	15414	0	0.68706	0.0019498	0.0089668	0.870427	143	5	0.68706
FBgn0037044	2	0.76667	0.76594	0.992082	12407	0	1.6846	0.0019601	0.0038047	0.870427	144	1	1.6846
FBgn0036836	6	0.37428	0.54664	0.990867	8330	1	0.53137	0.0020024	0.0091873	0.870427	145	5	0.53137
FBgn0029838	6	0.23235	0.41689	0.990467	6197	1	0.54237	0.0020084	0.0092145	0.870427	146	4	0.54237
FBgn0034580	6	0.65767	0.75295	0.992082	11433	1	0.52654	0.0020154	0.0092335	0.870427	147	4	0.52654
FBgn0054007	6	0.13356	0.28149	0.990467	4166	2	0.98861	0.0020154	0.0092335	0.870427	148	4	0.98861
FBgn0036970	6	0.43847	0.59769	0.991024	9080	1	0.99078	0.0020154	0.0092335	0.870427	149	4	0.99078
FBgn0004638	7	0.7543	0.82708	0.993146	12286	1	0.46824	0.0020278	0.010075	0.879565	150	6	0.46824
FBgn0039498	6	0.12018	0.26238	0.990467	3889	3	-0.31041	0.0020307	0.0093019	0.870427	151	1	-0.31041
FBgn0029957	4	0.071137	0.16001	0.990467	2723	1	0.30211	0.0020664	0.0073892	0.870427	152	2	0.30211
FBgn0265526	4	0.99793	0.99794	0.999996	15591	0	0.68319	0.0020734	0.0074107	0.870427	153	4	0.68319
FBgn0033588	6	0.8527	0.85724	0.993146	13389	1	0.7387	0.0021022	0.0095687	0.872283	154	4	0.7387
FBgn0051546	6	0.10648	0.24236	0.990467	3602	2	0.68869	0.0021022	0.0095687	0.872283	155	4	0.68869
FBgn0034510	5	0.98882	0.98892	0.999097	15465	0	0.82787	0.0021107	0.0092253	0.870427	156	4	0.82787
FBgn0052016	6	0.060764	0.16313	0.990467	2385	2	0.3981	0.0021116	0.0096035	0.872283	157	3	0.3981
FBgn0043791	6	0.1842	0.35213	0.990467	5228	3	0.27457	0.0021387	0.0097125	0.872283	158	3	0.27457
FBgn0085436	4	0.99782	0.99783	0.999996	15589	0	0.55345	0.0021769	0.0077832	0.870427	159	4	0.55345
FBgn0037935	6	0.42473	0.58656	0.991024	8919	2	1.0023	0.0022236	0.010061	0.879565	160	4	1.0023
FBgn0031296	6	0.69587	0.76846	0.992082	11754	1	0.61559	0.0022419	0.010131	0.879565	161	4	0.61559
FBgn0031286	4	0.99775	0.99775	0.999996	15588	0	1.0204	0.0022516	0.0080525	0.870427	162	4	1.0204
FBgn0001941	6	0.87074	0.8721	0.993146	13665	1	0.59497	0.0022651	0.010222	0.879592	163	4	0.59497
FBgn0034246	6	0.97417	0.9742	0.999097	15200	0	0.7328	0.0022823	0.010286	0.879592	164	5	0.7328
FBgn0000117	6	0.37056	0.54365	0.99062	8287	2	0.34949	0.0022862	0.0103	0.879592	165	3	0.34949
FBgn0034279	5	0.92799	0.92822	0.999097	14517	0	0.83749	0.0022873	0.0099615	0.879565	166	4	0.83749
FBgn0035760	6	0.98779	0.9878	0.999097	15438	0	0.66345	0.0023238	0.010431	0.881877	167	5	0.66345
FBgn0000274	6	0.84178	0.84909	0.993146	13267	1	0.66793	0.0023321	0.010459	0.881877	168	4	0.66793
FBgn0031505	6	0.95782	0.9578	0.999097	14957	0	0.54254	0.0023427	0.010501	0.881877	169	4	0.54254
FBgn0263653	4	0.99762	0.99762	0.999996	15585	0	0.8633	0.0023752	0.0084814	0.870427	170	4	0.8633
FBgn0034366	6	0.8187	0.83293	0.993146	12964	1	0.63077	0.0023959	0.010727	0.881877	171	4	0.63077
FBgn0039736	6	0.9038	0.90356	0.993146	14117	0	0.42468	0.0024024	0.010752	0.881877	172	5	0.42468
FBgn0039538	6	0.18522	0.3535	0.990467	5251	2	0.2609	0.0024383	0.010901	0.881877	173	3	0.2609
FBgn0035772	4	0.01501	0.043809	0.987	776	2	0.29198	0.0024662	0.008802	0.870427	174	2	0.29198
FBgn0037183	6	0.20454	0.37979	0.990467	5638	2	-0.019653	0.0024691	0.011037	0.884514	175	2	-0.019653
FBgn0032414	5	0.54502	0.65583	0.991098	10367	1	0.89751	0.0024792	0.010764	0.881877	176	4	0.89751
FBgn0267712	4	0.98214	0.98213	0.999097	15342	0	0.73366	0.0025092	0.0089364	0.870427	177	3	0.73366
FBgn0039972	8	0.99136	0.99136	0.999097	15507	0	0.50482	0.0025202	0.012997	0.889425	178	6	0.50482
FBgn0263217	4	0.18235	0.30089	0.990467	5188	1	1.0934	0.0025385	0.009039	0.870427	179	3	1.0934
FBgn0265525	4	0.28108	0.41206	0.990467	7070	1	0.077948	0.002541	0.0090466	0.870427	180	1	0.077948
FBgn0035346	8	0.24686	0.46555	0.990562	6487	2	-0.0080191	0.0025643	0.013197	0.889425	181	2	-0.0080191
FBgn0259992	8	0.96993	0.9701	0.999097	15134	0	0.57018	0.0025951	0.01332	0.889425	182	5	0.57018
FBgn0035762	4	0.99105	0.9911	0.999097	15500	0	1.0704	0.0025981	0.009217	0.870427	183	4	1.0704
FBgn0034391	6	0.7671	0.80237	0.993146	12411	1	0.61515	0.0026004	0.011566	0.889425	184	4	0.61515
FBgn0031217	6	0.99861	0.99856	0.999996	15604	0	0.48273	0.0026045	0.011583	0.889425	185	5	0.48273
FBgn0265934	4	0.76038	0.76004	0.992082	12345	1	0.98046	0.0026146	0.0092728	0.870427	186	3	0.98046
FBgn0001276	2	0.6467	0.64639	0.991024	11359	0	1.0695	0.0026249	0.0050734	0.870427	187	1	1.0695
FBgn0030297	6	0.33354	0.51496	0.990562	7790	1	0.64792	0.0026392	0.011717	0.889425	188	4	0.64792
FBgn0027291	6	0.99486	0.99488	0.99987	15549	0	0.31014	0.0026534	0.011774	0.889425	189	3	0.31014
FBgn0263868	4	0.51598	0.58202	0.991024	9998	1	0.63748	0.0026834	0.0094952	0.872283	190	3	0.63748
FBgn0014006	6	0.95266	0.9526	0.999097	14876	0	0.85246	0.0027028	0.011969	0.889425	191	4	0.85246
FBgn0026722	6	0.24355	0.43182	0.990467	6425	1	0.63741	0.0027085	0.011995	0.889425	192	4	0.63741
FBgn0034251	6	0.5191	0.66354	0.991655	10040	1	0.4939	0.0027253	0.012074	0.889425	193	3	0.4939
FBgn0010651	7	0.2169	0.4088	0.990467	5910	3	0.33333	0.0027375	0.01336	0.889425	194	4	0.33333
FBgn0267970	4	0.99726	0.99726	0.999996	15581	0	1.1557	0.0027403	0.0096979	0.872283	195	4	1.1557
FBgn0024361	7	0.2767	0.47787	0.990562	7008	3	0.0027233	0.0027423	0.013375	0.889425	196	2	0.0027233
FBgn0041205	6	0.32049	0.50491	0.990562	7616	2	0.040997	0.0027424	0.01214	0.889425	197	1	0.040997
FBgn0050464	6	0.24663	0.43584	0.990467	6482	3	0.30292	0.0027918	0.012333	0.889425	198	3	0.30292
FBgn0031604	6	0.88722	0.88709	0.993146	13881	1	0.52406	0.0027949	0.012346	0.889425	199	5	0.52406
FBgn0031829	4	0.99715	0.99715	0.999996	15580	0	0.73998	0.0028492	0.010108	0.879565	200	4	0.73998
FBgn0054044	4	0.71143	0.7157	0.992082	11879	1	0.61083	0.002851	0.010114	0.879565	201	2	0.61083
FBgn0031091	6	0.14517	0.29775	0.990467	4415	2	-0.023347	0.0028846	0.012659	0.889425	202	1	-0.023347
FBgn0262787	6	0.87257	0.87371	0.993146	13685	1	0.46417	0.0028906	0.012683	0.889425	203	5	0.46417
FBgn0261554	8	0.13131	0.30599	0.990467	4114	3	-0.04962	0.0028963	0.014593	0.901627	204	3	-0.04962
FBgn0033395	6	0.57466	0.71102	0.992082	10698	1	0.54031	0.0029116	0.012763	0.889425	205	4	0.54031
FBgn0026196	6	0.21021	0.38734	0.990467	5768	2	0.49579	0.0029307	0.012846	0.889425	206	3	0.49579
FBgn0262020	5	0.85788	0.85814	0.993146	13469	0	0.111	0.0029678	0.012793	0.889425	207	2	0.111
FBgn0039520	6	0.99083	0.99086	0.999097	15490	0	0.84402	0.0029708	0.01301	0.889425	208	5	0.84402
FBgn0035624	6	0.59604	0.7298	0.992082	10957	2	0.19679	0.0029828	0.013053	0.889425	209	3	0.19679
FBgn0050036	6	0.015063	0.05397	0.987	780	3	-0.018579	0.0029913	0.013083	0.889425	210	3	-0.018579
FBgn0086656	6	0.068549	0.18038	0.990467	2636	4	-0.28303	0.0029913	0.013083	0.889425	211	1	-0.28303
FBgn0260965	6	0.53507	0.67694	0.992082	10221	2	0.42455	0.0030068	0.013147	0.889425	212	4	0.42455
FBgn0038348	6	0.80053	0.82148	0.993146	12797	1	0.70265	0.0030216	0.013203	0.889425	213	4	0.70265
FBgn0030030	6	0.76244	0.79994	0.993146	12370	1	0.5707	0.0030365	0.013255	0.889425	214	4	0.5707
FBgn0051974	4	0.70623	0.71131	0.992082	11845	1	0.8936	0.0030644	0.010832	0.881877	215	3	0.8936
FBgn0266730	4	0.99693	0.99692	0.999996	15578	0	0.62086	0.0030656	0.010838	0.881877	216	4	0.62086
FBgn0264994	4	0.99692	0.99691	0.999996	15577	0	0.74343	0.0030808	0.010887	0.881877	217	4	0.74343
FBgn0024732	6	0.91887	0.91851	0.99903	14368	0	0.57133	0.0031371	0.013651	0.893624	218	4	0.57133
FBgn0037293	6	0.035839	0.10569	0.988999	1565	2	0.88875	0.0031428	0.013674	0.893624	219	4	0.88875
FBgn0267684	4	0.70883	0.71353	0.992082	11863	1	0.71413	0.0031618	0.011171	0.889425	220	3	0.71413
FBgn0053667	6	0.98511	0.98513	0.999097	15396	0	0.75474	0.0031847	0.013823	0.893624	221	4	0.75474
FBgn0036481	6	0.9801	0.98013	0.999097	15311	0	0.62909	0.0032234	0.013983	0.893624	222	5	0.62909
FBgn0264715	4	0.92149	0.92113	0.99903	14418	0	1.1288	0.0032383	0.011445	0.889425	223	3	1.1288
FBgn0034708	6	0.42274	0.58498	0.991024	8900	2	0.16338	0.0032403	0.014046	0.893624	224	3	0.16338
FBgn0037960	5	0.99674	0.99675	0.999996	15575	0	0.80379	0.0032571	0.013951	0.893624	225	5	0.80379
FBgn0029932	6	0.40185	0.56839	0.990867	8664	1	0.46742	0.0032645	0.014144	0.893624	226	5	0.46742
FBgn0263206	6	0.23761	0.42394	0.990467	6301	3	0.17193	0.0032679	0.014155	0.893624	227	3	0.17193
FBgn0028341	15	0.1384	0.38306	0.990467	4266	4	0.053617	0.0032725	0.020727	0.901627	228	5	0.053617
FBgn0263236	6	0.9038	0.90356	0.993146	14011	0	0.78233	0.0032759	0.014181	0.893624	229	4	0.78233
FBgn0039439	6	0.99826	0.9982	0.999996	15597	0	0.60834	0.0032761	0.014182	0.893624	230	5	0.60834
FBgn0058045	5	0.73792	0.75815	0.992082	12119	1	0.20426	0.0032938	0.014065	0.893624	231	2	0.20426
FBgn0045486	6	0.44703	0.60442	0.991024	9179	1	0.76367	0.0033026	0.014298	0.897312	232	3	0.76367
FBgn0034069	4	0.99668	0.99669	0.999996	15572	0	0.57888	0.0033164	0.011702	0.889425	233	4	0.57888
FBgn0037923	6	0.56382	0.70168	0.992082	10566	2	0.20882	0.0033255	0.014395	0.897381	234	3	0.20882
FBgn0025781	6	0.74245	0.78975	0.992082	12167	1	0.6472	0.0033306	0.014414	0.897381	235	3	0.6472
FBgn0050073	1	0.99667	0.99676	0.999996	15571	0	2.1976	0.0033338	0.0032981	0.870427	236	1	2.1976
FBgn0040285	4	0.99663	0.99664	0.999996	15570	0	0.78687	0.0033712	0.011872	0.889425	237	4	0.78687
FBgn0028932	4	0.99657	0.99658	0.999996	15568	0	0.5169	0.0034335	0.012059	0.889425	238	4	0.5169
FBgn0085736	6	0.83516	0.84432	0.993146	13183	1	0.14285	0.0034536	0.014886	0.901627	239	2	0.14285
FBgn0040227	6	0.10052	0.23372	0.990467	3477	1	0.90334	0.0034646	0.014924	0.901627	240	4	0.90334
FBgn0266960	4	0.99653	0.99654	0.999996	15566	0	0.9383	0.0034708	0.012186	0.889425	241	4	0.9383
FBgn0034697	6	0.83044	0.84097	0.993146	13119	1	0.70494	0.0034794	0.014983	0.901627	242	5	0.70494
FBgn0036522	6	0.37246	0.54517	0.990867	8312	2	0.64414	0.0034956	0.015045	0.901627	243	4	0.64414
FBgn0015777	6	0.80736	0.82568	0.993146	12842	1	0.064444	0.0035454	0.015237	0.901627	244	2	0.064444
FBgn0034413	6	0.96646	0.96655	0.999097	15068	0	0.8256	0.0035475	0.015245	0.901627	245	4	0.8256
FBgn0040730	6	0.2629	0.45702	0.990467	6802	3	-0.41086	0.0035603	0.015298	0.901627	246	1	-0.41086
FBgn0037120	4	0.99641	0.99644	0.999996	15564	0	0.35554	0.0035871	0.012561	0.889425	247	4	0.35554
FBgn0032625	6	0.9038	0.90356	0.993146	14201	0	0.61177	0.0035971	0.015443	0.901627	248	5	0.61177
FBgn0265101	6	0.9038	0.90356	0.993146	14190	0	1.1855	0.0036486	0.015644	0.901627	249	4	1.1855
FBgn0033701	6	0.41915	0.58211	0.991024	8864	2	0.07112	0.0036539	0.015662	0.901627	250	2	0.07112
FBgn0027526	6	0.9835	0.98353	0.999097	15361	0	0.90837	0.0036693	0.015709	0.901627	251	5	0.90837
FBgn0266100	8	0.9977	0.99767	0.999996	15587	0	0.73139	0.0036722	0.017778	0.901627	252	6	0.73139
FBgn0036740	4	0.99631	0.99632	0.999996	15562	0	0.54321	0.0036949	0.012937	0.889425	253	4	0.54321
FBgn0035069	6	0.99851	0.99846	0.999996	15602	0	0.42257	0.0037625	0.016067	0.901627	254	5	0.42257
FBgn0035689	4	0.72108	0.724	0.992082	11968	1	1.098	0.0037787	0.013205	0.889425	255	2	1.098
FBgn0266400	4	0.94942	0.94926	0.999097	14833	0	1.0766	0.0037787	0.013205	0.889425	256	2	1.0766
FBgn0050047	6	0.99735	0.99731	0.999996	15582	0	0.53824	0.0037803	0.016129	0.901627	257	5	0.53824
FBgn0037150	6	0.077203	0.19901	0.990467	2909	2	-0.01893	0.0038091	0.016233	0.901627	258	3	-0.01893
FBgn0032259	6	0.96269	0.96274	0.999097	15019	0	0.49346	0.0038091	0.016233	0.901627	259	3	0.49346
FBgn0260766	6	0.5839	0.71913	0.992082	10815	1	0.53862	0.0038202	0.01627	0.901627	260	5	0.53862
FBgn0264709	4	0.99617	0.99621	0.999996	15560	0	0.41842	0.0038259	0.013371	0.889425	261	4	0.41842
FBgn0036483	7	0.93488	0.93485	0.999097	14613	0	0.052741	0.0038622	0.018294	0.901627	262	2	0.052741
FBgn0261872	6	0.16398	0.32413	0.990467	4823	1	0.63209	0.0038818	0.016514	0.901627	263	4	0.63209
FBgn0015571	4	0.368	0.50607	0.990562	8262	1	0.082579	0.0039164	0.013662	0.893624	264	2	0.082579
FBgn0040736	6	0.42798	0.58922	0.991024	8959	1	0.072804	0.0039169	0.016646	0.901627	265	2	0.072804
FBgn0261675	6	0.026446	0.082795	0.987	1208	1	0.17209	0.0039169	0.016646	0.901627	266	3	0.17209
FBgn0033789	6	0.57177	0.70851	0.992082	10662	1	0.26986	0.0039169	0.016646	0.901627	267	2	0.26986
FBgn0085599	6	0.019837	0.066274	0.987	956	1	0.14545	0.0039169	0.016646	0.901627	268	2	0.14545
FBgn0262485	6	0.61649	0.73762	0.992082	11116	1	0.76172	0.0039169	0.016646	0.901627	269	4	0.76172
FBgn0029891	6	0.71407	0.7764	0.992082	11907	1	0.42487	0.0039698	0.016845	0.901627	270	5	0.42487
FBgn0038811	2	0.99602	0.99593	0.999996	15558	0	1.8079	0.0039799	0.0075913	0.870427	271	2	1.8079
FBgn0266284	6	0.21951	0.39979	0.990467	5961	1	0.62522	0.0039846	0.016911	0.901627	272	5	0.62522
FBgn0027506	6	0.93492	0.9348	0.999097	14618	0	0.84926	0.0039855	0.016913	0.901627	273	4	0.84926
FBgn0035995	6	0.9339	0.93375	0.999097	14602	0	0.61776	0.0040118	0.017011	0.901627	274	3	0.61776
FBgn0267447	4	0.18694	0.3061	0.990467	5286	1	0.67248	0.0040138	0.014002	0.893624	275	3	0.67248
FBgn0034266	1	0.99592	0.99602	0.999996	15557	0	1.5749	0.0040826	0.0040318	0.870427	276	1	1.5749
FBgn0036448	6	0.70511	0.77241	0.992082	11838	1	0.74558	0.0040832	0.017283	0.901627	277	4	0.74558
FBgn0035791	2	0.99588	0.99579	0.999996	15556	0	0.79689	0.0041206	0.0078586	0.870427	278	2	0.79689
FBgn0266053	5	0.83677	0.83725	0.993146	13207	1	0.79852	0.0041507	0.016674	0.901627	279	4	0.79852
FBgn0036783	6	0.96852	0.96864	0.999097	15110	0	0.65592	0.0041574	0.017547	0.901627	280	5	0.65592
FBgn0050222	6	0.82599	0.83786	0.993146	13051	1	1.0624	0.0041744	0.017611	0.901627	281	4	1.0624
FBgn0033788	6	0.94502	0.94487	0.999097	14766	0	0.47768	0.0041998	0.017716	0.901627	282	4	0.47768
FBgn0265669	6	0.9038	0.90356	0.993146	14005	0	0.41069	0.0042	0.017716	0.901627	283	4	0.41069
FBgn0266421	6	0.9038	0.90356	0.993146	14147	0	0.18361	0.0042	0.017716	0.901627	284	3	0.18361
FBgn0030375	6	0.47821	0.62974	0.991024	9530	2	0.50826	0.0042	0.017716	0.901627	285	4	0.50826
FBgn0024365	6	0.032185	0.096858	0.987	1446	3	0.21162	0.0042711	0.017981	0.901627	286	3	0.21162
FBgn0050016	4	0.97991	0.97988	0.999097	15309	0	1.0096	0.0042795	0.014889	0.901627	287	3	1.0096
FBgn0263082	4	0.81045	0.80996	0.993146	12875	0	0.74692	0.0042814	0.014895	0.901627	288	3	0.74692
FBgn0265434	4	0.077307	0.17194	0.990467	2916	1	0.83683	0.0043015	0.014972	0.901627	289	3	0.83683
FBgn0031523	6	0.10287	0.23712	0.990467	3522	2	-0.39458	0.0043145	0.018147	0.901627	290	3	-0.39458
FBgn0283494	6	0.49779	0.64587	0.991024	9780	1	0.30129	0.0043145	0.018147	0.901627	291	2	0.30129
FBgn0083981	6	0.99853	0.99848	0.999996	15603	0	0.56741	0.0043374	0.018228	0.901627	292	5	0.56741
FBgn0033844	6	0.021449	0.07036	0.987	1028	3	0.046489	0.0043442	0.018255	0.901627	293	3	0.046489
FBgn0036152	6	0.70675	0.77312	0.992082	11851	1	0.20716	0.0043776	0.018371	0.901627	294	2	0.20716
FBgn0032368	6	0.95389	0.95383	0.999097	14899	0	0.49522	0.0043812	0.018381	0.901627	295	5	0.49522
FBgn0003093	4	0.75002	0.75018	0.992082	12242	1	0.25233	0.0043903	0.015273	0.901627	296	2	0.25233
FBgn0035688	4	0.99373	0.99375	0.999506	15537	0	1.2324	0.0043952	0.015287	0.901627	297	4	1.2324
FBgn0015754	8	0.58022	0.7432	0.992082	10768	2	0.68728	0.0044656	0.020927	0.901627	298	5	0.68728
FBgn0029175	6	0.32987	0.5122	0.990562	7749	1	0.44887	0.0044834	0.01876	0.901627	299	4	0.44887
FBgn0038246	6	0.97599	0.97605	0.999097	15239	0	0.22766	0.0045197	0.018909	0.901627	300	3	0.22766
FBgn0001233	5	0.020481	0.063875	0.987	983	2	0.91732	0.0045523	0.017954	0.901627	301	3	0.91732
FBgn0267281	4	0.93327	0.93294	0.999097	14586	0	0.18648	0.0045561	0.015815	0.901627	302	2	0.18648
FBgn0265891	4	0.13067	0.24207	0.990467	4101	2	0.2992	0.0045723	0.01587	0.901627	303	2	0.2992
FBgn0030735	4	0.99061	0.99064	0.999097	15485	0	0.93994	0.004578	0.015889	0.901627	304	4	0.93994
FBgn0050048	6	0.94873	0.94858	0.999097	14813	0	0.0036287	0.0045908	0.019164	0.901627	305	1	0.0036287
FBgn0004363	8	0.92288	0.92688	0.999097	14440	1	0.67356	0.0046102	0.021517	0.901627	306	5	0.67356
FBgn0030351	6	0.94211	0.942	0.999097	14725	0	0.72336	0.0046387	0.019345	0.901627	307	5	0.72336
FBgn0031738	8	0.57598	0.74068	0.992082	10718	1	-0.14568	0.0046549	0.021685	0.901627	308	3	-0.14568
FBgn0259227	5	0.93919	0.93936	0.999097	14683	0	0.42246	0.0046563	0.018318	0.901627	309	3	0.42246
FBgn0032456	4	0.83577	0.83523	0.993146	13190	0	0.32349	0.0046746	0.016223	0.901627	310	2	0.32349
FBgn0261396	4	0.63478	0.65688	0.991098	11269	1	0.13255	0.0047219	0.016394	0.901627	311	1	0.13255
FBgn0033010	6	0.42556	0.58724	0.991024	8932	2	-0.034209	0.0047335	0.019666	0.901627	312	2	-0.034209
FBgn0085362	6	0.080725	0.20429	0.990467	3001	2	0.15956	0.0047335	0.019666	0.901627	313	3	0.15956
FBgn0035996	6	0.29052	0.48233	0.990562	7204	2	0.14443	0.0047335	0.019666	0.901627	314	3	0.14443
FBgn0039627	6	0.46304	0.61745	0.991024	9360	2	0.59395	0.004795	0.019909	0.901627	315	4	0.59395
FBgn0030927	6	0.99832	0.99826	0.999996	15598	0	0.74531	0.0048162	0.019996	0.901627	316	5	0.74531
FBgn0032878	6	0.26635	0.46153	0.990467	6866	1	0.80355	0.0048195	0.020005	0.901627	317	4	0.80355
FBgn0260000	6	0.75397	0.7955	0.993146	12283	1	0.43948	0.0048248	0.020027	0.901627	318	5	0.43948
FBgn0040319	8	0.84396	0.88637	0.993146	13286	1	0.46548	0.0048256	0.022363	0.902294	319	5	0.46548
FBgn0010235	6	0.99349	0.9935	0.999449	15534	0	0.66524	0.0048357	0.020068	0.901627	320	4	0.66524
FBgn0031469	6	0.94502	0.94487	0.999097	14768	0	0.86513	0.0048595	0.02016	0.901627	321	4	0.86513
FBgn0267163	6	0.09433	0.22452	0.990467	3334	1	0.45418	0.0048729	0.020202	0.901627	322	5	0.45418
FBgn0036208	6	0.33709	0.51772	0.990562	7840	2	0.2308	0.0048749	0.02021	0.901627	323	3	0.2308
FBgn0052302	6	0.38547	0.55537	0.990867	8460	1	0.45647	0.0048908	0.020267	0.901627	324	3	0.45647
FBgn0024986	1	0.99508	0.9952	0.999996	15551	0	2.6893	0.0049205	0.0048498	0.870427	325	1	2.6893
FBgn0037021	6	0.91725	0.91691	0.99903	14341	0	0.57699	0.0049214	0.020371	0.901627	326	5	0.57699
FBgn0039938	6	0.52584	0.66917	0.991793	10122	1	0.49835	0.0049459	0.020462	0.901627	327	3	0.49835
FBgn0053460	6	0.47226	0.6249	0.991024	9462	2	-0.14486	0.0050524	0.020848	0.901627	328	1	-0.14486
FBgn0008636	6	0.35042	0.52799	0.990562	8011	2	0.21809	0.0050524	0.020848	0.901627	329	3	0.21809
FBgn0052351	6	0.49729	0.6455	0.991024	9774	1	0.57508	0.0050612	0.020867	0.901627	330	4	0.57508
FBgn0263844	4	0.86079	0.86043	0.993146	13521	0	0.62746	0.0051018	0.017661	0.901627	331	3	0.62746
FBgn0038705	6	0.97849	0.97855	0.999097	15286	0	0.45289	0.0051196	0.02109	0.901627	332	5	0.45289
FBgn0031517	6	0.26019	0.45357	0.990467	6751	2	0.11268	0.0051269	0.021113	0.901627	333	3	0.11268
FBgn0032734	6	0.34977	0.52749	0.990562	7996	1	0.27433	0.005159	0.021236	0.901627	334	4	0.27433
FBgn0052601	6	0.74593	0.79144	0.992895	12196	1	0.38845	0.0051771	0.021312	0.901627	335	4	0.38845
FBgn0039196	6	0.080554	0.20405	0.990467	2997	1	0.30671	0.0051897	0.021365	0.901627	336	4	0.30671
FBgn0265797	4	0.9149	0.91463	0.99903	14301	0	0.33817	0.0051956	0.017967	0.901627	337	2	0.33817
FBgn0030103	6	0.50882	0.65501	0.991098	9916	1	0.70999	0.0052086	0.021437	0.901627	338	4	0.70999
FBgn0035173	6	0.5962	0.72995	0.992082	10958	2	-0.11407	0.00523	0.021524	0.901627	339	2	-0.11407
FBgn0031008	6	0.2973	0.48741	0.990562	7283	2	-0.050766	0.0052402	0.021553	0.901627	340	3	-0.050766
FBgn0039464	5	0.6209	0.69096	0.992082	11148	1	1.1093	0.0052482	0.020174	0.901627	341	4	1.1093
FBgn0036181	6	0.9038	0.90356	0.993146	14222	0	0.71802	0.005254	0.021613	0.901627	342	4	0.71802
FBgn0027791	4	0.99474	0.99477	0.99987	15546	0	0.48397	0.0052629	0.01819	0.901627	343	4	0.48397
FBgn0034283	6	0.92471	0.92451	0.999057	14469	0	0.59168	0.0052811	0.02173	0.901627	344	5	0.59168
FBgn0083984	6	0.41291	0.57715	0.990867	8791	1	0.63797	0.0052814	0.02173	0.901627	345	3	0.63797
FBgn0262608	6	0.68147	0.76251	0.992082	11614	1	-0.012919	0.0052814	0.02173	0.901627	346	2	-0.012919
FBgn0003308	6	0.8864	0.88635	0.993146	13867	1	0.75862	0.0052973	0.021789	0.901627	347	5	0.75862
FBgn0065092	4	0.97333	0.97311	0.999097	15193	0	0.30646	0.0053376	0.018417	0.901627	348	3	0.30646
FBgn0063923	5	0.98619	0.98631	0.999097	15411	0	0.30565	0.0053498	0.02051	0.901627	349	3	0.30565
FBgn0028703	6	0.80254	0.82268	0.993146	12806	1	0.53111	0.0053542	0.021977	0.901627	350	5	0.53111
FBgn0037003	6	0.19566	0.36769	0.990467	5461	1	0.34984	0.0053719	0.022052	0.902118	351	4	0.34984
FBgn0052202	4	0.99462	0.99465	0.99987	15544	0	0.65201	0.0053781	0.018547	0.901627	352	4	0.65201
FBgn0261991	6	0.29581	0.48629	0.990562	7273	2	0.1046	0.0053899	0.022124	0.902294	353	3	0.1046
FBgn0024921	4	0.99459	0.99462	0.99987	15543	0	0.77788	0.0054122	0.018656	0.901627	354	4	0.77788
FBgn0002878	4	0.99457	0.9946	0.99987	15542	0	0.50285	0.0054326	0.018722	0.901627	355	4	0.50285
FBgn0037688	6	0.9611	0.96114	0.999097	14995	0	0.3782	0.0054425	0.022304	0.902294	356	4	0.3782
FBgn0051357	6	0.92255	0.9223	0.99903	14435	0	0.38875	0.0054429	0.022305	0.902294	357	4	0.38875
FBgn0031129	6	0.34437	0.52336	0.990562	7943	2	-0.088675	0.0054768	0.022436	0.902294	358	2	-0.088675
FBgn0002023	15	0.71939	0.89885	0.993146	11956	2	0.2978	0.0054816	0.032775	0.942699	359	8	0.2978
FBgn0265177	6	0.88804	0.88789	0.993146	13900	1	0.76276	0.0054837	0.022461	0.902294	360	4	0.76276
FBgn0032462	6	0.54128	0.68237	0.992082	10286	2	0.46641	0.0055032	0.022536	0.902294	361	3	0.46641
FBgn0015522	6	0.21519	0.394	0.990467	5870	2	0.52014	0.0055032	0.022536	0.902294	362	4	0.52014
FBgn0260639	4	0.1939	0.31404	0.990467	5412	2	-1.1665	0.0055034	0.018975	0.901627	363	1	-1.1665
FBgn0033972	4	0.95459	0.95437	0.999097	14905	0	0.25446	0.0055034	0.018975	0.901627	364	1	0.25446
FBgn0035475	6	0.9038	0.90356	0.993146	14160	0	0.34909	0.0055139	0.022576	0.902294	365	3	0.34909
FBgn0259209	8	0.73444	0.84122	0.993146	12087	1	0.35128	0.0055458	0.0252	0.915592	366	5	0.35128
FBgn0036240	6	0.50606	0.65277	0.991098	9876	2	0.80342	0.0055869	0.022844	0.904637	367	4	0.80342
FBgn0264959	7	0.19946	0.38841	0.990467	5540	3	0.23815	0.005609	0.025542	0.915592	368	3	0.23815
FBgn0004652	13	0.31931	0.60438	0.991024	7593	2	0.10596	0.0056249	0.032034	0.939448	369	4	0.10596
FBgn0040382	6	0.23918	0.42596	0.990467	6331	3	-0.12597	0.0056559	0.023098	0.907401	370	2	-0.12597
FBgn0034087	6	0.85413	0.85835	0.993146	13411	1	0.66725	0.0056782	0.023197	0.907401	371	3	0.66725
FBgn0052683	6	0.97747	0.97756	0.999097	15269	0	0.57094	0.0056865	0.023226	0.907401	372	4	0.57094
FBgn0025724	5	0.34185	0.49135	0.990562	7911	1	0.14327	0.0056919	0.021571	0.901627	373	2	0.14327
FBgn0024179	5	0.45257	0.59749	0.991024	9245	1	0.10272	0.0056919	0.021571	0.901627	374	1	0.10272
FBgn0052590	4	0.5952	0.63012	0.991024	10950	1	1.0723	0.0056953	0.019642	0.901627	375	3	1.0723
FBgn0030186	6	0.92864	0.92847	0.999097	14526	0	0.68416	0.0057477	0.023429	0.907766	376	4	0.68416
FBgn0022355	6	0.0032646	0.014016	0.928071	215	2	0.5103	0.005758	0.023468	0.907766	377	4	0.5103
FBgn0267266	4	0.33761	0.47559	0.990562	7853	2	-0.03087	0.0057637	0.019866	0.901627	378	1	-0.03087
FBgn0028700	4	0.98512	0.98511	0.999097	15398	0	0.58803	0.0057976	0.019974	0.901627	379	3	0.58803
FBgn0000287	6	0.49029	0.6397	0.991024	9686	2	-0.15976	0.0058011	0.023635	0.911979	380	2	-0.15976
FBgn0052792	6	0.75003	0.79352	0.992902	12243	1	0.37337	0.0058209	0.023717	0.912854	381	5	0.37337
FBgn0033710	6	0.45628	0.61195	0.991024	9289	2	-0.14317	0.0058688	0.023881	0.915592	382	2	-0.14317
FBgn0052625	6	0.99468	0.9947	0.99987	15545	0	0.60995	0.0059135	0.024047	0.915592	383	4	0.60995
FBgn0005655	6	0.2645	0.45913	0.990467	6831	1	0.38683	0.005935	0.024131	0.915592	384	5	0.38683
FBgn0050487	6	0.99824	0.99818	0.999996	15596	0	0.62388	0.0059439	0.024171	0.915592	385	5	0.62388
FBgn0265011	6	0.2697	0.46588	0.990562	6925	1	0.34875	0.006033	0.024482	0.915592	386	5	0.34875
FBgn0266347	6	0.11427	0.25386	0.990467	3781	2	0.77797	0.0060387	0.024504	0.915592	387	4	0.77797
FBgn0037491	4	0.98494	0.98495	0.999097	15394	0	0.82249	0.0060718	0.020878	0.901627	388	3	0.82249
FBgn0035358	6	0.96138	0.96142	0.999097	14998	0	0.61259	0.0060729	0.024624	0.915592	389	4	0.61259
FBgn0263863	6	0.45377	0.60992	0.991024	9256	1	0.6167	0.0060927	0.024692	0.915592	390	5	0.6167
FBgn0028871	5	0.75612	0.77066	0.992082	12309	1	0.62945	0.0060954	0.02283	0.904637	391	4	0.62945
FBgn0035207	5	0.89917	0.89942	0.993146	13974	0	0.44375	0.0061096	0.022866	0.904637	392	4	0.44375
FBgn0036796	6	0.71714	0.7778	0.992082	11939	1	0.41919	0.0061171	0.024777	0.915592	393	4	0.41919
FBgn0263774	6	0.25789	0.45062	0.990467	6703	3	-0.21367	0.0061171	0.024777	0.915592	394	2	-0.21367
FBgn0265453	4	0.50668	0.57678	0.990867	9881	1	0.65307	0.0061303	0.021064	0.901627	395	3	0.65307
FBgn0024804	6	0.60584	0.73391	0.992082	11037	1	0.35816	0.0061527	0.024905	0.915592	396	3	0.35816
FBgn0038706	6	0.043235	0.12308	0.990467	1806	2	0.67086	0.0061658	0.024961	0.915592	397	3	0.67086
FBgn0027339	10	0.17093	0.39692	0.990467	4968	2	0.40201	0.006183	0.030617	0.939448	398	7	0.40201
FBgn0267082	4	0.82958	0.829	0.993146	13104	0	0.16752	0.0061897	0.021251	0.901627	399	2	0.16752
FBgn0264880	4	0.9164	0.9161	0.99903	14321	0	0.93118	0.0061949	0.021271	0.901627	400	3	0.93118
FBgn0085292	6	0.99641	0.99639	0.999996	15563	0	0.57383	0.0062081	0.025105	0.915592	401	4	0.57383
FBgn0033252	6	0.80507	0.82422	0.993146	12828	1	0.067757	0.0062235	0.025171	0.915592	402	2	0.067757
FBgn0034201	6	0.64792	0.74913	0.992082	11375	1	0.47441	0.0062569	0.025289	0.915592	403	5	0.47441
FBgn0028646	8	0.10047	0.25425	0.990467	3475	3	0.45505	0.0062582	0.028069	0.939448	404	5	0.45505
FBgn0010520	3	0.76406	0.76396	0.992082	12382	0	1.4701	0.0062875	0.017255	0.901627	405	2	1.4701
FBgn0283479	6	0.96665	0.96672	0.999097	15074	0	0.51515	0.0063243	0.025527	0.915592	406	5	0.51515
FBgn0262604	4	0.91236	0.91211	0.99903	14280	0	0.25021	0.0063316	0.021705	0.901627	407	2	0.25021
FBgn0035348	6	0.33288	0.51445	0.990562	7785	1	0.65877	0.0063338	0.025564	0.915592	408	4	0.65877
FBgn0031037	6	0.94788	0.94771	0.999097	14806	0	0.38241	0.0063436	0.025604	0.915592	409	4	0.38241
FBgn0035906	6	0.72792	0.78274	0.992082	12034	1	0.66063	0.0063923	0.025803	0.916415	410	3	0.66063
FBgn0036158	4	0.99361	0.99363	0.999452	15535	0	0.82159	0.0063943	0.021918	0.901627	411	4	0.82159
FBgn0264890	4	0.70228	0.70807	0.992082	11810	1	0.6597	0.0064062	0.021965	0.901627	412	3	0.6597
FBgn0265420	4	0.96686	0.96666	0.999097	15078	0	0.61065	0.0064135	0.021982	0.901627	413	3	0.61065
FBgn0033159	6	0.42628	0.58783	0.991024	8940	1	0.33073	0.0064364	0.025966	0.918026	414	3	0.33073
FBgn0040775	6	0.74495	0.79097	0.992895	12186	1	0.52508	0.0064744	0.026103	0.919499	415	3	0.52508
FBgn0010040	6	0.75059	0.79382	0.993029	12251	1	0.56241	0.0065224	0.026252	0.919499	416	5	0.56241
FBgn0031730	10	0.16934	0.39495	0.990467	4934	4	0.16515	0.0065522	0.03214	0.939448	417	5	0.16515
FBgn0035005	6	0.29272	0.48393	0.990562	7231	2	0.24182	0.006553	0.026357	0.919499	418	3	0.24182
FBgn0039503	6	0.84447	0.85107	0.993146	13297	1	0.50855	0.0065544	0.026361	0.919499	419	5	0.50855
FBgn0260461	6	0.042753	0.12191	0.990467	1789	3	-0.29979	0.0065776	0.026443	0.920318	420	2	-0.29979
FBgn0034330	6	0.94953	0.94939	0.999097	14834	0	0.69627	0.0066491	0.026668	0.923841	421	4	0.69627
FBgn0034281	6	0.97924	0.97927	0.999097	15300	0	0.55342	0.0066781	0.026781	0.923841	422	5	0.55342
FBgn0014949	6	0.97688	0.97694	0.999097	15257	0	0.4781	0.0066781	0.026781	0.923841	423	5	0.4781
FBgn0267799	4	0.83651	0.83597	0.993146	13201	0	0.65734	0.0067064	0.022866	0.904637	424	2	0.65734
FBgn0050460	11	0.2442	0.50336	0.990562	6442	3	0.11168	0.0067124	0.034918	0.95047	425	5	0.11168
FBgn0025815	6	0.1214	0.2641	0.990467	3912	3	0.13756	0.0067354	0.026999	0.926627	426	3	0.13756
FBgn0262543	4	0.33646	0.47433	0.990562	7836	1	0.43735	0.0067634	0.023068	0.907401	427	2	0.43735
FBgn0037892	6	0.98174	0.98177	0.999097	15337	0	0.78127	0.0067786	0.027166	0.926627	428	4	0.78127
FBgn0051125	4	0.68346	0.693	0.992082	11632	1	0.057949	0.006781	0.023115	0.907401	429	1	0.057949
FBgn0035513	6	0.20074	0.37469	0.990467	5570	3	0.49527	0.0067878	0.027204	0.926627	430	3	0.49527
FBgn0035541	6	0.0041035	0.017243	0.948769	263	4	-0.57454	0.0068264	0.027332	0.928239	431	2	-0.57454
FBgn0037481	6	0.83253	0.84242	0.993146	13154	1	0.369	0.0068559	0.027432	0.928239	432	3	0.369
FBgn0037997	6	0.94613	0.94594	0.999097	14779	0	0.62788	0.0068577	0.027443	0.928239	433	4	0.62788
FBgn0015803	5	0.71104	0.74105	0.992082	11874	1	0.221	0.0068745	0.025096	0.915592	434	2	0.221
FBgn0267539	4	0.66286	0.67719	0.992082	11468	1	0.67702	0.0068873	0.023441	0.907766	435	2	0.67702
FBgn0083953	6	0.058325	0.15769	0.990467	2287	1	0.36037	0.0069038	0.027609	0.931837	436	5	0.36037
FBgn0027341	3	0.60153	0.60597	0.991024	11006	1	0.40333	0.0069545	0.019034	0.901627	437	2	0.40333
FBgn0039637	3	0.8368	0.83646	0.993146	13208	0	-0.071442	0.0069545	0.019034	0.901627	438	1	-0.071442
FBgn0001319	9	0.12968	0.31866	0.990467	4078	1	0.29225	0.0070006	0.033559	0.942699	439	4	0.29225
FBgn0026061	7	0.048743	0.14329	0.990467	1988	3	0.67608	0.0070287	0.030217	0.939448	440	4	0.67608
FBgn0032382	6	0.55702	0.69581	0.992082	10513	1	0.21447	0.0070575	0.028158	0.939448	441	3	0.21447
FBgn0020647	6	0.088785	0.21635	0.990467	3213	3	0.28205	0.0070598	0.028168	0.939448	442	3	0.28205
FBgn0264961	4	0.55379	0.60417	0.991024	10474	1	0.93222	0.0070752	0.024043	0.915592	443	3	0.93222
FBgn0029658	6	0.48689	0.6369	0.991024	9639	1	0.35521	0.0071454	0.028506	0.939448	444	3	0.35521
FBgn0260798	6	0.99896	0.99894	0.999996	15609	0	0.76677	0.0071508	0.028529	0.939448	445	5	0.76677
FBgn0036921	4	0.39652	0.51966	0.990562	8603	1	0.7084	0.0071874	0.024433	0.915592	446	3	0.7084
FBgn0030787	6	0.86179	0.86456	0.993146	13541	1	0.6467	0.0072088	0.028723	0.939448	447	4	0.6467
FBgn0034970	4	0.94942	0.94926	0.999097	14828	0	0.66622	0.0072159	0.024519	0.915592	448	3	0.66622
FBgn0033640	6	0.046803	0.13135	0.990467	1913	2	0.18766	0.0072163	0.028746	0.939448	449	3	0.18766
FBgn0033268	6	0.98863	0.98865	0.999097	15456	0	0.59765	0.0072306	0.028799	0.939448	450	5	0.59765
FBgn0034595	6	0.45071	0.60746	0.991024	9227	2	0.38248	0.0072528	0.028882	0.939448	451	3	0.38248
FBgn0264912	4	0.98676	0.98678	0.999097	15423	0	0.58858	0.0072614	0.024668	0.915592	452	3	0.58858
FBgn0024947	6	0.65565	0.75215	0.992082	11427	1	0.23806	0.0072872	0.028988	0.939448	453	3	0.23806
FBgn0000568	16	0.98061	0.99174	0.999165	15322	1	0.40999	0.0073128	0.042203	0.954554	454	9	0.40999
FBgn0265910	4	0.99268	0.99274	0.999185	15522	0	0.30594	0.0073165	0.024843	0.915592	455	4	0.30594
FBgn0003996	6	0.60073	0.73214	0.992082	10993	1	0.48763	0.0073552	0.029229	0.939448	456	4	0.48763
FBgn0034120	6	0.25671	0.44904	0.990467	6678	2	-0.20173	0.0073581	0.02924	0.939448	457	2	-0.20173
FBgn0032184	6	0.98809	0.9881	0.999097	15450	0	0.48272	0.0073632	0.029261	0.939448	458	5	0.48272
FBgn0265988	6	0.60774	0.73455	0.992082	11048	1	0.59148	0.007366	0.029271	0.939448	459	3	0.59148
FBgn0025809	4	0.79005	0.78951	0.992082	12690	0	0.54455	0.007398	0.025104	0.915592	460	3	0.54455
FBgn0031258	6	0.25406	0.44558	0.990467	6620	1	0.87568	0.0074167	0.029452	0.939448	461	4	0.87568
FBgn0263005	6	0.060112	0.16164	0.990467	2362	4	-0.48403	0.0074289	0.029502	0.939448	462	2	-0.48403
FBgn0267236	6	0.31941	0.50408	0.990562	7595	1	0.13992	0.0074296	0.029504	0.939448	463	2	0.13992
FBgn0039713	4	0.99253	0.9926	0.999185	15519	0	0.592	0.0074657	0.025336	0.915592	464	4	0.592
FBgn0003545	4	0.34333	0.48204	0.990562	7931	1	1.1628	0.0074734	0.025356	0.915592	465	3	1.1628
FBgn0037276	6	0.87203	0.87322	0.993146	13677	1	0.49368	0.0074947	0.029754	0.939448	466	5	0.49368
FBgn0035988	6	0.4103	0.57508	0.990867	8763	1	0.67097	0.0075016	0.029788	0.939448	467	4	0.67097
FBgn0030700	6	0.7314	0.78437	0.992082	12067	1	0.38353	0.0075546	0.029996	0.939448	468	5	0.38353
FBgn0264560	6	0.45148	0.60805	0.991024	9235	2	0.48367	0.0075708	0.030057	0.939448	469	3	0.48367
FBgn0003205	4	0.18256	0.30112	0.990467	5195	1	0.75641	0.0075831	0.025708	0.916415	470	3	0.75641
FBgn0027081	7	0.27165	0.47211	0.990562	6955	2	0.30574	0.0075877	0.032094	0.939448	471	4	0.30574
FBgn0029977	4	0.99241	0.99246	0.999185	15518	0	0.41109	0.0075926	0.02575	0.916415	472	4	0.41109
FBgn0032170	6	0.81609	0.83125	0.993146	12939	1	0.58738	0.0075973	0.030156	0.939448	473	4	0.58738
FBgn0035771	5	0.91085	0.91111	0.998401	14273	0	0.66393	0.0076073	0.027217	0.926627	474	4	0.66393
FBgn0038407	6	0.97309	0.97314	0.999097	15187	0	0.58735	0.0076089	0.030211	0.939448	475	4	0.58735
FBgn0019661	6	0.49846	0.64639	0.991024	9786	2	0.47929	0.0076204	0.030258	0.939448	476	4	0.47929
FBgn0053454	6	0.065736	0.17414	0.990467	2549	2	0.087395	0.0076415	0.030338	0.939448	477	3	0.087395
FBgn0266805	4	0.57704	0.61847	0.991024	10733	1	-0.044106	0.0076558	0.025947	0.918026	478	1	-0.044106
FBgn0026439	6	0.017938	0.06136	0.987	880	2	0.66505	0.0076625	0.030412	0.939448	479	4	0.66505
FBgn0265658	4	0.95799	0.95784	0.999097	14959	0	0.79174	0.0077382	0.026222	0.919499	480	2	0.79174
FBgn0001491	4	0.18656	0.30566	0.990467	5278	1	0.5838	0.0077382	0.026222	0.919499	481	2	0.5838
FBgn0032408	6	0.87239	0.87354	0.993146	13684	1	0.44789	0.0077693	0.030787	0.939448	482	5	0.44789
FBgn0030893	6	0.84577	0.852	0.993146	13308	1	-0.074469	0.0077725	0.030803	0.939448	483	2	-0.074469
FBgn0053300	6	0.83755	0.84608	0.993146	13217	1	0.41298	0.0077729	0.030804	0.939448	484	4	0.41298
FBgn0039801	6	0.99815	0.99808	0.999996	15595	0	0.59044	0.007788	0.030858	0.939448	485	5	0.59044
FBgn0037712	6	0.87884	0.87925	0.993146	13769	1	0.55199	0.0078089	0.03093	0.939448	486	4	0.55199
FBgn0267914	4	0.86008	0.85973	0.993146	13517	0	0.9578	0.007855	0.02661	0.923841	487	3	0.9578
FBgn0036829	6	0.0061891	0.024965	0.98673	359	3	0.20097	0.0078719	0.031168	0.939448	488	3	0.20097
FBgn0052391	6	0.22618	0.40864	0.990467	6074	3	0.41489	0.0078987	0.031263	0.939448	489	3	0.41489
FBgn0032522	6	0.95296	0.95288	0.999097	14884	0	0.5329	0.0079165	0.031322	0.939448	490	5	0.5329
FBgn0032094	6	0.22466	0.40661	0.990467	6043	2	0.22586	0.0079249	0.031346	0.939448	491	3	0.22586
FBgn0037734	6	0.52584	0.66917	0.991793	10123	2	0.76819	0.0079262	0.031348	0.939448	492	4	0.76819
FBgn0038879	6	0.58018	0.71583	0.992082	10767	1	0.26688	0.0079505	0.031442	0.939448	493	5	0.26688
FBgn0040005	6	0.079411	0.20232	0.990467	2968	2	0.61104	0.0079953	0.031617	0.939448	494	4	0.61104
FBgn0069056	6	0.97904	0.97908	0.999097	15294	0	0.99319	0.0079997	0.031631	0.939448	495	5	0.99319
FBgn0263981	4	0.98463	0.98464	0.999097	15388	0	1.0227	0.0080271	0.027137	0.926627	496	3	1.0227
FBgn0002838	6	0.91848	0.91816	0.99903	14364	0	0.73198	0.0080457	0.031788	0.939448	497	4	0.73198
FBgn0003748	14	0.097096	0.29751	0.990467	3394	7	-0.20498	0.0080839	0.043947	0.954554	498	4	-0.20498
FBgn0262518	7	0.89629	0.89969	0.993146	13956	1	0.39598	0.0081067	0.033836	0.942699	499	5	0.39598
FBgn0036311	6	0.28679	0.47949	0.990562	7150	1	0.60924	0.0081076	0.031993	0.939448	500	5	0.60924
FBgn0039778	6	0.58418	0.71939	0.992082	10820	2	0.21784	0.0081616	0.032168	0.939448	501	3	0.21784
FBgn0039882	6	0.55577	0.69476	0.992082	10495	2	0.46526	0.0081968	0.032299	0.939448	502	4	0.46526
FBgn0036821	6	0.80527	0.82435	0.993146	12829	1	0.44228	0.0082001	0.03231	0.939448	503	4	0.44228
FBgn0031522	6	0.9038	0.90356	0.993146	14181	0	0.34008	0.0082132	0.032363	0.939448	504	3	0.34008
FBgn0037295	6	0.37665	0.54848	0.990867	8356	1	0.29113	0.0082436	0.032463	0.939448	505	4	0.29113
FBgn0040871	6	0.058611	0.15834	0.990467	2307	4	-0.28549	0.0082437	0.032463	0.939448	506	1	-0.28549
FBgn0037677	6	0.73247	0.78491	0.992082	12075	1	0.60951	0.0082437	0.032463	0.939448	507	5	0.60951
FBgn0052536	4	0.98368	0.98367	0.999097	15367	0	0.65313	0.0082627	0.027886	0.939154	508	3	0.65313
FBgn0005536	6	0.58321	0.7185	0.992082	10806	2	-0.0241	0.0082906	0.032614	0.942067	509	2	-0.0241
FBgn0030642	4	0.99166	0.99171	0.999165	15510	0	0.72787	0.0083428	0.028155	0.939448	510	4	0.72787
FBgn0086757	6	0.67502	0.75989	0.992082	11564	1	0.60831	0.0083495	0.032803	0.942699	511	4	0.60831
FBgn0261268	6	0.97177	0.9719	0.999097	15168	0	0.46597	0.0083635	0.032852	0.942699	512	3	0.46597
FBgn0036837	12	0.15295	0.38364	0.990467	4590	3	0.026759	0.0083824	0.042806	0.954554	513	4	0.026759
FBgn0031609	4	0.99161	0.99167	0.999165	15509	0	0.43948	0.0083862	0.028286	0.939448	514	4	0.43948
FBgn0035817	6	0.29759	0.48763	0.990562	7290	2	0.13962	0.0084535	0.033175	0.942699	515	3	0.13962
FBgn0000279	5	0.033909	0.10013	0.987	1507	2	-0.79624	0.0084691	0.029833	0.939448	516	2	-0.79624
FBgn0031094	6	0.4413	0.59988	0.991024	9108	2	0.69379	0.0084996	0.033336	0.942699	517	4	0.69379
FBgn0025469	4	0.90505	0.90465	0.993883	14240	0	-0.031487	0.0085063	0.028643	0.939448	518	1	-0.031487
FBgn0265315	4	0.95577	0.95556	0.999097	14925	0	0.66594	0.0085183	0.028681	0.939448	519	2	0.66594
FBgn0038391	6	0.22989	0.41362	0.990467	6151	1	0.42845	0.0086194	0.033747	0.942699	520	5	0.42845
FBgn0037099	6	0.54991	0.68975	0.992082	10429	1	0.304	0.0086331	0.033792	0.942699	521	4	0.304
FBgn0036391	6	0.55107	0.69074	0.992082	10440	1	0.38248	0.0086331	0.033792	0.942699	522	3	0.38248
FBgn0259916	6	0.14795	0.30166	0.990467	4468	3	-0.29467	0.0086331	0.033792	0.942699	523	1	-0.29467
FBgn0001990	6	0.33709	0.51772	0.990562	7841	2	0.031396	0.0086331	0.033792	0.942699	524	1	0.031396
FBgn0031065	6	0.099617	0.23241	0.990467	3454	3	-0.28835	0.0086513	0.033853	0.942699	525	2	-0.28835
FBgn0264915	4	0.97439	0.97422	0.999097	15208	0	0.94625	0.008713	0.029311	0.939448	526	3	0.94625
FBgn0003507	4	0.094727	0.20119	0.990467	3342	1	1.0091	0.008713	0.029311	0.939448	527	3	1.0091
FBgn0031494	6	0.79351	0.81717	0.993146	12747	1	0.70705	0.0087449	0.034181	0.947063	528	4	0.70705
FBgn0032889	11	0.59533	0.79516	0.993146	10953	3	0.19731	0.0087895	0.043099	0.954554	529	5	0.19731
FBgn0263608	6	0.9038	0.90356	0.993146	14193	0	0.039861	0.0088455	0.034536	0.95047	530	2	0.039861
FBgn0013811	6	0.88527	0.88523	0.993146	13852	1	0.3995	0.0089163	0.03478	0.95047	531	4	0.3995
FBgn0032921	4	0.99105	0.9911	0.999097	15501	0	0.60817	0.0089493	0.030076	0.939448	532	4	0.60817
FBgn0039929	4	0.99105	0.9911	0.999097	15497	0	0.53685	0.0089493	0.030076	0.939448	533	4	0.53685
FBgn0266632	4	0.99105	0.9911	0.999097	15498	0	0.54486	0.0089493	0.030076	0.939448	534	4	0.54486
FBgn0267603	4	0.99105	0.9911	0.999097	15499	0	0.66786	0.0089493	0.030076	0.939448	535	4	0.66786
FBgn0003559	4	0.66836	0.68138	0.992082	11512	1	0.49762	0.0089565	0.030093	0.939448	536	3	0.49762
FBgn0003388	6	0.36662	0.54064	0.990562	8240	1	0.8661	0.0089638	0.03494	0.95047	537	5	0.8661
FBgn0011211	6	0.059428	0.16012	0.990467	2338	3	0.17633	0.0089871	0.035018	0.95047	538	3	0.17633
FBgn0031914	8	0.92684	0.92972	0.999097	14501	1	0.61059	0.009009	0.038823	0.954554	539	4	0.61059
FBgn0041702	6	0.99072	0.99074	0.999097	15487	0	0.60204	0.0090283	0.035172	0.95047	540	4	0.60204
FBgn0262567	6	0.78051	0.80965	0.993146	12503	1	0.59049	0.0090425	0.035212	0.95047	541	4	0.59049
FBgn0033075	6	0.96454	0.96459	0.999097	15045	0	0.099921	0.0090578	0.035266	0.95047	542	3	0.099921
FBgn0000212	4	0.98826	0.98826	0.999097	15451	0	0.83482	0.0091241	0.030615	0.939448	543	3	0.83482
FBgn0261705	6	0.45059	0.60735	0.991024	9224	1	-0.084164	0.0091286	0.03552	0.95047	544	1	-0.084164
FBgn0038751	6	0.76098	0.79914	0.993146	12358	1	0.26629	0.0091296	0.035522	0.95047	545	3	0.26629
FBgn0042696	6	0.016373	0.057279	0.987	822	2	0.12691	0.0091296	0.035522	0.95047	546	3	0.12691
FBgn0028644	6	0.83801	0.8464	0.993146	13222	1	0.76933	0.0091296	0.035522	0.95047	547	4	0.76933
FBgn0051391	5	0.12079	0.25007	0.990467	3898	3	-0.3527	0.0091477	0.031793	0.939448	548	1	-0.3527
FBgn0052445	6	0.66352	0.75527	0.992082	11475	1	0.62566	0.0091627	0.035642	0.95047	549	5	0.62566
FBgn0033339	6	0.71308	0.77596	0.992082	11895	1	0.55973	0.0091908	0.03573	0.951195	550	4	0.55973
FBgn0266406	4	0.35846	0.49888	0.990562	8128	2	-0.22366	0.0092619	0.031059	0.939448	551	2	-0.22366
FBgn0265345	4	0.1274	0.23832	0.990467	4038	2	-0.5729	0.0092619	0.031059	0.939448	552	1	-0.5729
FBgn0036560	6	0.99653	0.99652	0.999996	15567	0	0.33938	0.0093585	0.036317	0.954554	553	5	0.33938
FBgn0023509	6	0.21822	0.39813	0.990467	5941	3	-0.28195	0.0094116	0.036486	0.954554	554	2	-0.28195
FBgn0267664	4	0.99055	0.99058	0.999097	15483	0	0.5878	0.0094469	0.031639	0.939448	555	4	0.5878
FBgn0032871	6	0.60073	0.73214	0.992082	10997	1	0.65196	0.0094616	0.036656	0.954554	556	4	0.65196
FBgn0263385	4	0.9905	0.99053	0.999097	15481	0	0.34627	0.0094989	0.031796	0.939448	557	4	0.34627
FBgn0034933	5	0.94024	0.94042	0.999097	14699	0	0.5261	0.0095122	0.032879	0.942699	558	4	0.5261
FBgn0035696	6	0.41721	0.58054	0.990867	8839	2	0.51412	0.0095281	0.036884	0.954554	559	3	0.51412
FBgn0026441	4	0.26614	0.39532	0.990467	6863	2	0.50471	0.0095907	0.032077	0.939448	560	2	0.50471
FBgn0037896	4	0.377	0.51028	0.990562	8360	1	0.89923	0.0095907	0.032077	0.939448	561	2	0.89923
FBgn0034878	6	0.43868	0.59784	0.991024	9082	2	0.48482	0.0096313	0.03726	0.954554	562	4	0.48482
FBgn0002592	6	0.98863	0.98865	0.999097	15460	0	0.63512	0.0096371	0.037275	0.954554	563	5	0.63512
FBgn0261638	4	0.99033	0.99034	0.999097	15480	0	0.47966	0.0096722	0.032336	0.939448	564	4	0.47966
FBgn0011766	10	0.64922	0.82418	0.993146	11388	2	0.22482	0.009676	0.045237	0.954554	565	5	0.22482
FBgn0033086	6	0.16239	0.32189	0.990467	4781	2	0.11292	0.0096946	0.037484	0.954554	566	3	0.11292
FBgn0039332	6	0.24691	0.4362	0.990467	6489	1	0.45553	0.0096946	0.037484	0.954554	567	2	0.45553
FBgn0011829	6	0.44879	0.60588	0.991024	9203	2	0.33558	0.0097102	0.037534	0.954554	568	3	0.33558
FBgn0283531	6	0.99703	0.997	0.999996	15579	0	0.4673	0.0097438	0.037657	0.954554	569	4	0.4673
FBgn0033933	6	0.92441	0.92419	0.999037	14463	0	0.87256	0.0097464	0.03767	0.954554	570	4	0.87256
FBgn0043841	8	0.19506	0.4065	0.990467	5447	1	0.47347	0.0097775	0.0418	0.954554	571	6	0.47347
FBgn0265416	6	0.96878	0.96888	0.999097	15116	0	0.27812	0.0098303	0.037958	0.954554	572	5	0.27812
FBgn0032943	6	0.72284	0.78038	0.992082	11991	1	0.25097	0.0098361	0.037978	0.954554	573	3	0.25097
FBgn0000448	8	0.20828	0.42652	0.990467	5720	3	-0.03944	0.0098845	0.042206	0.954554	574	2	-0.03944
FBgn0037876	6	0.53667	0.67834	0.992082	10239	1	0.2999	0.009886	0.038151	0.954554	575	4	0.2999
FBgn0032600	6	0.87697	0.87757	0.993146	13741	1	0.51489	0.0098892	0.038158	0.954554	576	5	0.51489
FBgn0031606	6	0.36446	0.539	0.990562	8212	2	-0.12298	0.0099547	0.038384	0.954554	577	2	-0.12298
FBgn0265767	9	0.24345	0.47752	0.990562	6418	4	-0.062722	0.0099558	0.044278	0.954554	578	4	-0.062722
FBgn0030864	2	0.99004	0.98989	0.999097	15476	0	0.87835	0.0099625	0.018717	0.901627	579	2	0.87835
FBgn0266936	4	0.28268	0.41382	0.990467	7094	1	0.45905	0.009999	0.033357	0.942699	580	2	0.45905
FBgn0265413	6	0.9538	0.95373	0.999097	14894	0	0.37545	0.010015	0.038611	0.954554	581	4	0.37545
FBgn0267694	4	0.35652	0.49667	0.990562	8103	1	0.511	0.010017	0.033408	0.942699	582	3	0.511
FBgn0039827	6	0.27961	0.47414	0.990562	7047	2	0.34388	0.01002	0.038629	0.954554	583	3	0.34388
FBgn0030951	6	0.46057	0.61544	0.991024	9335	2	0.66379	0.01007	0.038805	0.954554	584	4	0.66379
FBgn0037327	8	0.19864	0.4119	0.990467	5527	3	-0.065132	0.010081	0.042903	0.954554	585	1	-0.065132
FBgn0051204	5	0.93213	0.93226	0.999097	14571	0	0.65947	0.0101	0.03459	0.95047	586	4	0.65947
FBgn0051635	7	0.64848	0.77457	0.992082	11379	2	0.40233	0.010108	0.04051	0.954554	587	5	0.40233
FBgn0030081	6	0.40562	0.57138	0.990867	8706	1	0.084605	0.010118	0.038973	0.954554	588	2	0.084605
FBgn0026402	4	0.93876	0.93848	0.999097	14675	0	0.71364	0.010131	0.033756	0.942699	589	3	0.71364
FBgn0264817	6	0.95983	0.95985	0.999097	14982	0	0.63212	0.010151	0.039082	0.954554	590	5	0.63212
FBgn0034741	6	0.96073	0.96078	0.999097	14992	0	0.15939	0.010154	0.039094	0.954554	591	3	0.15939
FBgn0083068	6	0.92624	0.92606	0.999097	14492	0	0.36809	0.010154	0.039094	0.954554	592	3	0.36809
FBgn0031995	6	0.48591	0.63611	0.991024	9625	1	-0.091097	0.010154	0.039094	0.954554	593	1	-0.091097
FBgn0015789	6	0.85837	0.86174	0.993146	13492	1	0.022952	0.010154	0.039094	0.954554	594	2	0.022952
FBgn0039911	6	0.96219	0.96225	0.999097	15006	0	0.48675	0.010165	0.039137	0.954554	595	4	0.48675
FBgn0266586	4	0.8984	0.89799	0.993146	13970	0	0.66362	0.010177	0.033903	0.942699	596	3	0.66362
FBgn0265667	4	0.91884	0.91851	0.99903	14366	0	0.53744	0.010249	0.034104	0.946617	597	3	0.53744
FBgn0013469	6	0.35042	0.52799	0.990562	8003	2	0.53454	0.010315	0.039653	0.954554	598	4	0.53454
FBgn0040102	6	0.48215	0.63296	0.991024	9578	2	0.75777	0.010316	0.039659	0.954554	599	3	0.75777
FBgn0039872	6	0.75003	0.79352	0.992902	12246	1	0.58582	0.010434	0.040091	0.954554	600	5	0.58582
FBgn0036670	6	0.82345	0.83613	0.993146	13016	1	0.47565	0.010434	0.040091	0.954554	601	5	0.47565
FBgn0011272	5	0.95909	0.95926	0.999097	14974	0	0.75549	0.010443	0.035591	0.95047	602	3	0.75549
FBgn0032793	4	0.074487	0.16649	0.990467	2833	2	-0.26827	0.010489	0.034638	0.95047	603	1	-0.26827
FBgn0267005	4	0.60632	0.63733	0.991024	11040	1	0.061581	0.010489	0.034638	0.95047	604	1	0.061581
FBgn0038144	6	0.1952	0.36711	0.990467	5453	2	0.47692	0.010511	0.040357	0.954554	605	4	0.47692
FBgn0037413	5	0.70392	0.7366	0.992082	11830	1	0.10825	0.010563	0.035943	0.954554	606	1	0.10825
FBgn0038436	6	0.0092701	0.035976	0.987	520	2	0.6496	0.010565	0.040543	0.954554	607	4	0.6496
FBgn0267245	4	0.82938	0.82881	0.993146	13100	0	0.077621	0.01063	0.034938	0.95047	608	1	0.077621
FBgn0031969	10	0.57554	0.77415	0.992082	10709	3	0.038785	0.01068	0.049347	0.954554	609	3	0.038785
FBgn0003257	6	0.28192	0.47586	0.990562	7083	2	0.091578	0.01068	0.040981	0.954554	610	2	0.091578
FBgn0010482	6	0.17708	0.34234	0.990467	5087	2	0.084651	0.010684	0.040998	0.954554	611	2	0.084651
FBgn0033971	6	0.9849	0.98493	0.999097	15392	0	0.20235	0.010684	0.040998	0.954554	612	3	0.20235
FBgn0033058	4	0.19645	0.3169	0.990467	5482	1	0.43586	0.010697	0.035084	0.95047	613	2	0.43586
FBgn0267978	8	0.39677	0.61281	0.991024	8607	1	0.36664	0.010704	0.045267	0.954554	614	6	0.36664
FBgn0037778	6	0.92097	0.9207	0.99903	14409	0	0.20097	0.010795	0.041394	0.954554	615	2	0.20097
FBgn0262838	6	0.64846	0.74935	0.992082	11378	1	0.38101	0.010796	0.041399	0.954554	616	5	0.38101
FBgn0034658	6	0.08187	0.206	0.990467	3035	2	-0.10456	0.010826	0.041507	0.954554	617	2	-0.10456
FBgn0051097	6	0.15006	0.30463	0.990467	4514	2	0.33639	0.010845	0.041579	0.954554	618	3	0.33639
FBgn0033379	4	0.50803	0.57754	0.990867	9902	1	0.59532	0.010854	0.035429	0.95047	619	2	0.59532
FBgn0033573	6	0.49003	0.63946	0.991024	9680	1	0.51053	0.010877	0.041682	0.954554	620	5	0.51053
FBgn0259716	6	0.56057	0.69886	0.992082	10540	1	0.52353	0.010877	0.041682	0.954554	621	5	0.52353
FBgn0052304	6	0.79273	0.81665	0.993146	12741	1	0.77323	0.01091	0.041795	0.954554	622	4	0.77323
FBgn0050430	6	0.3269	0.50992	0.990562	7719	2	0.56204	0.01091	0.041795	0.954554	623	4	0.56204
FBgn0031757	6	0.58514	0.72017	0.992082	10831	2	0.67052	0.010919	0.04182	0.954554	624	4	0.67052
FBgn0040628	6	0.19744	0.37018	0.990467	5503	1	0.72137	0.010949	0.04193	0.954554	625	5	0.72137
FBgn0039551	6	0.99508	0.99511	0.999973	15552	0	0.51978	0.010949	0.04193	0.954554	626	5	0.51978
FBgn0023097	1	0.98899	0.98912	0.999097	15467	0	0.94621	0.011012	0.010948	0.881877	627	1	0.94621
FBgn0040007	6	0.85657	0.86031	0.993146	13444	1	-0.12368	0.011044	0.042263	0.954554	628	2	-0.12368
FBgn0024248	6	0.62548	0.74086	0.992082	11188	1	0.56308	0.011063	0.042329	0.954554	629	5	0.56308
FBgn0085450	6	0.51273	0.65828	0.99121	9964	1	0.38597	0.011108	0.042505	0.954554	630	4	0.38597
FBgn0264599	4	0.52309	0.58612	0.991024	10080	1	0.80072	0.011123	0.036044	0.954554	631	3	0.80072
FBgn0039864	6	0.12342	0.26702	0.990467	3957	2	0.17838	0.011157	0.042692	0.954554	632	3	0.17838
FBgn0259151	6	0.33742	0.51799	0.990562	7849	1	0.36108	0.011179	0.042779	0.954554	633	3	0.36108
FBgn0000229	7	0.51885	0.68026	0.992082	10034	1	0.22537	0.011189	0.043946	0.954554	634	3	0.22537
FBgn0038981	6	0.50447	0.65139	0.991098	9859	2	0.73768	0.01125	0.04301	0.954554	635	4	0.73768
FBgn0036590	6	0.3916	0.56029	0.990867	8535	2	0.2437	0.011261	0.043052	0.954554	636	3	0.2437
FBgn0028837	6	0.99648	0.99646	0.999996	15565	0	0.41601	0.011289	0.043141	0.954554	637	5	0.41601
FBgn0087011	6	0.98329	0.9833	0.999097	15356	0	0.52067	0.011289	0.043141	0.954554	638	5	0.52067
FBgn0005612	6	0.9038	0.90356	0.993146	14007	0	0.3149	0.011299	0.043173	0.954554	639	3	0.3149
FBgn0003267	1	0.98869	0.98882	0.999097	15463	0	2.4207	0.011309	0.011236	0.889425	640	1	2.4207
FBgn0264360	4	0.75872	0.75841	0.992082	12332	1	0.59687	0.011315	0.036475	0.954554	641	2	0.59687
FBgn0259952	6	0.23872	0.42535	0.990467	6322	2	-0.38122	0.01132	0.043245	0.954554	642	2	-0.38122
FBgn0029843	8	0.75228	0.85411	0.993146	12268	2	-0.31124	0.01133	0.047653	0.954554	643	3	-0.31124
FBgn0264344	6	0.088537	0.21597	0.990467	3209	1	0.3047	0.011333	0.043297	0.954554	644	5	0.3047
FBgn0051634	6	0.23141	0.41561	0.990467	6179	2	0.61939	0.011345	0.043348	0.954554	645	4	0.61939
FBgn0262811	6	0.97924	0.97927	0.999097	15298	0	0.45478	0.011359	0.0434	0.954554	646	5	0.45478
FBgn0032612	7	0.10579	0.25611	0.990467	3585	2	0.46701	0.011407	0.044643	0.954554	647	5	0.46701
FBgn0032057	6	0.5284	0.67138	0.991846	10148	2	0.08169	0.01141	0.043576	0.954554	648	2	0.08169
FBgn0266324	2	0.98852	0.98839	0.999097	15455	0	1.5562	0.011481	0.021602	0.901627	649	2	1.5562
FBgn0053111	2	0.98847	0.98834	0.999097	15454	0	1.0711	0.011526	0.021675	0.901627	650	2	1.0711
FBgn0039473	6	0.56392	0.70177	0.992082	10567	1	0.23713	0.011529	0.043966	0.954554	651	3	0.23713
FBgn0040391	6	0.995	0.99503	0.999959	15550	0	0.42768	0.011541	0.044011	0.954554	652	5	0.42768
FBgn0020261	4	0.98549	0.98548	0.999097	15402	0	0.44061	0.011567	0.03701	0.954554	653	3	0.44061
FBgn0036259	6	0.9038	0.90356	0.993146	14024	0	0.067783	0.011568	0.044105	0.954554	654	1	0.067783
FBgn0053272	6	0.11456	0.2543	0.990467	3783	2	0.04351	0.011568	0.044105	0.954554	655	3	0.04351
FBgn0033374	1	0.9884	0.98849	0.999097	15453	0	1.8101	0.0116	0.011525	0.889425	656	1	1.8101
FBgn0266144	4	0.90597	0.9056	0.994511	14247	0	0.64047	0.011613	0.037107	0.954554	657	3	0.64047
FBgn0264867	4	0.83435	0.83384	0.993146	13173	0	1.1084	0.011617	0.037116	0.954554	658	3	1.1084
FBgn0035009	6	0.98604	0.98608	0.999097	15408	0	0.45529	0.01162	0.044286	0.954554	659	5	0.45529
FBgn0028408	8	0.40355	0.61929	0.991024	8682	2	-0.010727	0.011633	0.048813	0.954554	660	3	-0.010727
FBgn0032066	6	0.17029	0.33283	0.990467	4951	1	0.53307	0.011639	0.044357	0.954554	661	5	0.53307
FBgn0035025	6	0.81372	0.82973	0.993146	12911	1	0.9285	0.01169	0.044533	0.954554	662	4	0.9285
FBgn0033204	6	0.45628	0.61195	0.991024	9283	2	0.53711	0.01169	0.044533	0.954554	663	3	0.53711
FBgn0262486	6	0.80053	0.82148	0.993146	12796	1	0.74236	0.01169	0.044533	0.954554	664	3	0.74236
FBgn0262572	6	0.9038	0.90356	0.993146	14035	0	0.45076	0.011762	0.044776	0.954554	665	5	0.45076
FBgn0033447	6	0.93882	0.93872	0.999097	14677	0	0.44196	0.011766	0.04479	0.954554	666	4	0.44196
FBgn0034259	6	0.93039	0.93024	0.999097	14549	0	0.50817	0.011814	0.044952	0.954554	667	4	0.50817
FBgn0266954	4	0.95843	0.95826	0.999097	14966	0	0.81747	0.01185	0.037615	0.954554	668	3	0.81747
FBgn0038880	6	0.9038	0.90356	0.993146	14039	0	0.31614	0.011857	0.045104	0.954554	669	3	0.31614
FBgn0031722	6	0.073599	0.19133	0.990467	2795	3	-0.29956	0.011885	0.045196	0.954554	670	2	-0.29956
FBgn0034566	4	0.90772	0.9074	0.995871	14252	0	0.41292	0.011896	0.037715	0.954554	671	2	0.41292
FBgn0035584	4	0.98698	0.98698	0.999097	15427	0	0.75788	0.011926	0.037791	0.954554	672	3	0.75788
FBgn0267180	4	0.098388	0.20541	0.990467	3423	2	-0.076196	0.011927	0.037794	0.954554	673	1	-0.076196
FBgn0032053	6	0.57236	0.70902	0.992082	10664	2	0.091532	0.011956	0.04544	0.954554	674	3	0.091532
FBgn0266036	4	0.43787	0.5401	0.990562	9072	1	0.46701	0.011959	0.037864	0.954554	675	3	0.46701
FBgn0086655	9	0.17596	0.38558	0.990467	5068	2	0.43708	0.012022	0.051515	0.954554	676	5	0.43708
FBgn0000464	6	0.39989	0.56681	0.990867	8642	2	0.045759	0.012027	0.04568	0.954554	677	3	0.045759
FBgn0010453	6	0.51155	0.65726	0.991098	9947	1	0.69883	0.012037	0.045715	0.954554	678	4	0.69883
FBgn0030871	4	0.70065	0.70675	0.992082	11798	1	0.3884	0.012051	0.038067	0.954554	679	2	0.3884
FBgn0034475	6	0.58295	0.71827	0.992082	10802	1	0.049403	0.012097	0.045931	0.954554	680	2	0.049403
FBgn0260750	6	0.062792	0.16765	0.990467	2459	1	-0.065554	0.012168	0.046183	0.954554	681	2	-0.065554
FBgn0264552	6	0.82191	0.8351	0.993146	13002	1	0.41175	0.012238	0.046459	0.954554	682	3	0.41175
FBgn0037012	6	0.84327	0.85015	0.993146	13279	1	0.5498	0.012256	0.04652	0.954554	683	3	0.5498
FBgn0020509	6	0.5794	0.71518	0.992082	10763	1	0.50802	0.012269	0.046562	0.954554	684	4	0.50802
FBgn0028988	6	0.1398	0.29031	0.990467	4303	2	0.413	0.012275	0.046577	0.954554	685	3	0.413
FBgn0032337	6	0.20106	0.37515	0.990467	5574	2	0.57063	0.012275	0.046577	0.954554	686	4	0.57063
FBgn0004629	6	0.27735	0.47245	0.990562	7016	2	0.9337	0.012275	0.046577	0.954554	687	4	0.9337
FBgn0030391	4	0.15757	0.2728	0.990467	4686	2	0.2867	0.01228	0.038575	0.954554	688	2	0.2867
FBgn0266315	4	0.69293	0.70049	0.992082	11722	1	-0.064563	0.01228	0.038575	0.954554	689	1	-0.064563
FBgn0030778	6	0.9926	0.99265	0.999185	15520	0	0.4188	0.012282	0.046608	0.954554	690	5	0.4188
FBgn0032698	6	0.95307	0.95299	0.999097	14886	0	0.72111	0.012282	0.046608	0.954554	691	5	0.72111
FBgn0037087	6	0.93856	0.93847	0.999097	14668	0	0.65332	0.012282	0.046608	0.954554	692	5	0.65332
FBgn0037419	6	0.98418	0.98423	0.999097	15377	0	0.43929	0.012282	0.046608	0.954554	693	5	0.43929
FBgn0031752	6	0.98863	0.98865	0.999097	15457	0	0.53465	0.012282	0.046608	0.954554	694	5	0.53465
FBgn0028870	6	0.98432	0.98437	0.999097	15382	0	0.69007	0.012282	0.046608	0.954554	695	5	0.69007
FBgn0038790	6	0.95386	0.9538	0.999097	14898	0	0.70668	0.012282	0.046608	0.954554	696	5	0.70668
FBgn0003278	6	0.5074	0.65382	0.991098	9894	1	0.46104	0.012282	0.046608	0.954554	697	5	0.46104
FBgn0266051	4	0.96607	0.96587	0.999097	15063	0	0.58562	0.012323	0.038671	0.954554	698	3	0.58562
FBgn0039536	6	0.43803	0.59734	0.991024	9073	2	0.027068	0.012379	0.046932	0.954554	699	3	0.027068
FBgn0265882	4	0.041081	0.099783	0.987	1736	3	-0.55337	0.012398	0.03884	0.954554	700	1	-0.55337
FBgn0032222	2	0.98757	0.98741	0.999097	15435	0	1.1005	0.012429	0.023374	0.907766	701	2	1.1005
FBgn0250822	6	0.26196	0.45583	0.990467	6790	2	0.17104	0.01245	0.047184	0.954554	702	3	0.17104
FBgn0039797	6	0.22392	0.40561	0.990467	6028	2	0.77502	0.01246	0.047217	0.954554	703	4	0.77502
FBgn0033081	3	0.63253	0.63409	0.991024	11243	1	0.98869	0.012473	0.03314	0.942699	704	2	0.98869
FBgn0036974	5	0.38042	0.52781	0.990562	8399	2	0.061884	0.012497	0.041551	0.954554	705	2	0.061884
FBgn0034160	6	0.27109	0.46766	0.990562	6949	2	-0.080004	0.012521	0.047428	0.954554	706	2	-0.080004
FBgn0040206	4	0.59885	0.63249	0.991024	10982	1	0.25524	0.012563	0.039199	0.954554	707	2	0.25524
FBgn0035445	6	0.64355	0.74751	0.992082	11329	1	0.35539	0.012591	0.047674	0.954554	708	3	0.35539
FBgn0038473	4	0.42494	0.53357	0.990562	8925	1	0.62395	0.0126	0.039292	0.954554	709	3	0.62395
FBgn0023175	6	0.92103	0.92076	0.99903	14410	0	0.27649	0.012655	0.04789	0.954554	710	3	0.27649
FBgn0003450	4	0.81703	0.81651	0.993146	12949	0	0.56196	0.012657	0.039426	0.954554	711	3	0.56196
FBgn0030954	6	0.9038	0.90356	0.993146	14162	0	0.51081	0.012715	0.048077	0.954554	712	5	0.51081
FBgn0000477	6	0.57098	0.70787	0.992082	10657	1	0.55456	0.012767	0.048244	0.954554	713	4	0.55456
FBgn0036474	6	0.19524	0.36716	0.990467	5455	1	0.66944	0.012774	0.04827	0.954554	714	4	0.66944
FBgn0030352	4	0.89169	0.89123	0.993146	13931	0	0.83425	0.012813	0.039763	0.954554	715	3	0.83425
FBgn0038188	6	0.25579	0.4478	0.990467	6649	1	0.11726	0.012838	0.048502	0.954554	716	2	0.11726
FBgn0265835	6	0.79813	0.82002	0.993146	12777	1	0.44121	0.012839	0.048505	0.954554	717	4	0.44121
FBgn0038494	6	0.10637	0.24223	0.990467	3598	2	-0.057657	0.012944	0.048872	0.954554	718	2	-0.057657
FBgn0265253	4	0.95459	0.95437	0.999097	14906	0	0.56369	0.012965	0.04013	0.954554	719	3	0.56369
FBgn0023542	6	0.99309	0.99311	0.999185	15532	0	0.50279	0.012988	0.049009	0.954554	720	5	0.50279
FBgn0031196	6	0.93684	0.93675	0.999097	14645	0	0.40696	0.012998	0.049044	0.954554	721	4	0.40696
FBgn0262902	4	0.85352	0.85304	0.993146	13399	0	0.5364	0.013033	0.040282	0.954554	722	3	0.5364
FBgn0031741	6	0.22392	0.40561	0.990467	6032	2	0.22656	0.01312	0.049465	0.954554	723	3	0.22656
FBgn0040383	6	0.44474	0.60255	0.991024	9142	2	0.2487	0.01312	0.049465	0.954554	724	4	0.2487
FBgn0027343	6	0.090034	0.21818	0.990467	3243	3	-0.38042	0.01312	0.049465	0.954554	725	1	-0.38042
FBgn0037170	6	0.98608	0.98613	0.999097	15409	0	0.55039	0.013217	0.049783	0.954554	726	5	0.55039
FBgn0038973	6	0.95704	0.95699	0.999097	14942	0	0.31149	0.013227	0.049818	0.954554	727	2	0.31149
FBgn0000008	6	0.57074	0.70766	0.992082	10651	2	0.28902	0.013262	0.049929	0.954554	728	3	0.28902
FBgn0030365	6	0.95713	0.95708	0.999097	14945	0	0.52814	0.013266	0.049942	0.954554	729	3	0.52814
FBgn0053772	6	0.72181	0.77991	0.992082	11980	1	0.34537	0.013295	0.050054	0.954554	730	3	0.34537
FBgn0031183	6	0.26019	0.45357	0.990467	6750	2	-0.26911	0.01332	0.050146	0.954554	731	2	-0.26911
FBgn0085412	6	0.13007	0.27656	0.990467	4086	3	0.087834	0.01333	0.050177	0.954554	732	3	0.087834
FBgn0015509	4	0.72307	0.72571	0.992082	11996	1	0.31157	0.013363	0.041011	0.954554	733	2	0.31157
FBgn0027560	6	0.53438	0.67639	0.992082	10219	2	-0.37844	0.013367	0.050298	0.954554	734	1	-0.37844
FBgn0024945	6	0.94163	0.94152	0.999097	14717	0	0.28866	0.013374	0.050315	0.954554	735	3	0.28866
FBgn0038640	6	0.77544	0.80686	0.993146	12479	1	-0.058453	0.013374	0.050315	0.954554	736	2	-0.058453
FBgn0052017	6	0.54527	0.68582	0.992082	10371	2	0.41328	0.013389	0.050376	0.954554	737	4	0.41328
FBgn0036978	4	0.0084591	0.028494	0.987	485	1	0.42812	0.013443	0.041181	0.954554	738	2	0.42812
FBgn0266310	2	0.5163	0.51613	0.990562	10003	1	1.1092	0.013444	0.025202	0.915592	739	1	1.1092
FBgn0032688	3	0.9836	0.98371	0.999097	15363	0	1.0643	0.013455	0.035566	0.95047	740	3	1.0643
FBgn0263392	7	0.12115	0.28464	0.990467	3902	1	0.23358	0.013551	0.051505	0.954554	741	3	0.23358
FBgn0032256	6	0.87034	0.87176	0.993146	13657	1	0.57001	0.013552	0.050935	0.954554	742	5	0.57001
FBgn0261858	6	0.92695	0.92676	0.999097	14504	0	0.6405	0.01356	0.050962	0.954554	743	4	0.6405
FBgn0038098	6	0.25626	0.44846	0.990467	6663	1	0.53976	0.01356	0.050962	0.954554	744	3	0.53976
FBgn0031116	6	0.32407	0.50774	0.990562	7681	2	0.33834	0.01356	0.050962	0.954554	745	3	0.33834
FBgn0030616	6	0.99112	0.99113	0.999097	15503	0	0.39595	0.013596	0.051078	0.954554	746	4	0.39595
FBgn0031702	6	0.97924	0.97927	0.999097	15297	0	0.56274	0.013604	0.051104	0.954554	747	4	0.56274
FBgn0036833	6	0.98209	0.98212	0.999097	15341	0	0.46799	0.013623	0.051173	0.954554	748	5	0.46799
FBgn0034221	5	0.98342	0.9835	0.999097	15359	0	0.53339	0.013641	0.044895	0.954554	749	4	0.53339
FBgn0035490	6	0.078091	0.20035	0.990467	2936	1	0.45697	0.013674	0.051343	0.954554	750	4	0.45697
FBgn0027528	6	0.31957	0.50419	0.990562	7600	2	0.67665	0.013693	0.051405	0.954554	751	3	0.67665
FBgn0262002	6	0.99284	0.99288	0.999185	15525	0	0.28132	0.0137	0.051421	0.954554	752	5	0.28132
FBgn0051183	5	0.98612	0.98624	0.999097	15410	0	0.60556	0.013701	0.045077	0.954554	753	4	0.60556
FBgn0029770	4	0.096204	0.20291	0.990467	3375	1	0.60582	0.013709	0.041784	0.954554	754	3	0.60582
FBgn0027090	4	0.75872	0.75841	0.992082	12333	1	0.51739	0.013811	0.042	0.954554	755	3	0.51739
FBgn0264815	12	0.90979	0.95641	0.999097	14264	2	0.27294	0.013821	0.066015	0.954554	756	8	0.27294
FBgn0041240	6	0.9653	0.96538	0.999097	15053	0	0.66267	0.013836	0.051866	0.954554	757	5	0.66267
FBgn0011747	6	0.58455	0.7197	0.992082	10823	2	0.23282	0.013861	0.051946	0.954554	758	3	0.23282
FBgn0031854	6	0.15927	0.31756	0.990467	4723	1	0.0069789	0.013861	0.051946	0.954554	759	1	0.0069789
FBgn0038268	6	0.0080666	0.031793	0.987	461	2	-0.2469	0.013861	0.051946	0.954554	760	1	-0.2469
FBgn0038873	6	0.086933	0.21357	0.990467	3167	3	-0.35998	0.013861	0.051946	0.954554	761	1	-0.35998
FBgn0036503	6	0.55275	0.69214	0.992082	10458	2	-0.12723	0.013861	0.051946	0.954554	762	2	-0.12723
FBgn0038455	6	0.20466	0.37996	0.990467	5642	1	0.080375	0.013861	0.051946	0.954554	763	2	0.080375
FBgn0036640	6	0.63047	0.74271	0.992082	11228	1	0.44131	0.013902	0.052078	0.954554	764	5	0.44131
FBgn0266094	4	0.90626	0.90592	0.994782	14248	0	0.0453	0.013904	0.042218	0.954554	765	1	0.0453
FBgn0044811	6	0.83639	0.84523	0.993146	13199	1	0.15396	0.013927	0.052153	0.954554	766	2	0.15396
FBgn0261682	6	0.78648	0.81308	0.993146	12534	1	0.44825	0.013968	0.052292	0.954554	767	5	0.44825
FBgn0015828	6	0.15927	0.31756	0.990467	4724	3	0.25133	0.013983	0.052344	0.954554	768	3	0.25133
FBgn0036843	4	0.98279	0.98279	0.999097	15351	0	0.28717	0.014022	0.042493	0.954554	769	2	0.28717
FBgn0051477	6	0.55292	0.6923	0.992082	10463	2	-0.044467	0.014036	0.052552	0.954554	770	2	-0.044467
FBgn0033278	6	0.92398	0.92378	0.99903	14457	0	0.55811	0.014048	0.052592	0.954554	771	4	0.55811
FBgn0029937	6	0.46	0.61499	0.991024	9325	1	0.71136	0.014048	0.052592	0.954554	772	4	0.71136
FBgn0086895	6	0.66326	0.75516	0.992082	11471	1	0.54858	0.014048	0.052592	0.954554	773	4	0.54858
FBgn0052299	4	0.60612	0.6372	0.991024	11039	1	-0.12473	0.014139	0.042765	0.954554	774	1	-0.12473
FBgn0262735	12	0.21394	0.46939	0.990562	5849	2	0.30504	0.01418	0.067316	0.954554	775	6	0.30504
FBgn0004859	4	0.70823	0.71303	0.992082	11860	1	0.44133	0.014229	0.042967	0.954554	776	2	0.44133
FBgn0035010	6	0.79657	0.81905	0.993146	12768	1	0.45157	0.014234	0.053213	0.954554	777	5	0.45157
FBgn0038766	6	0.20069	0.37462	0.990467	5568	2	0.11023	0.014247	0.053266	0.954554	778	3	0.11023
FBgn0005664	6	0.85761	0.86115	0.993146	13458	1	0.61282	0.014282	0.053387	0.954554	779	4	0.61282
FBgn0029825	5	0.76257	0.77533	0.992082	12372	1	0.49924	0.014298	0.046824	0.954554	780	2	0.49924
FBgn0031002	6	0.83959	0.84753	0.993146	13239	1	0.31206	0.014386	0.053711	0.954554	781	3	0.31206
FBgn0261606	6	0.099995	0.23297	0.990467	3466	2	0.23257	0.014399	0.053745	0.954554	782	2	0.23257
FBgn0267182	4	0.15076	0.26499	0.990467	4531	1	0.78901	0.014439	0.043455	0.954554	783	3	0.78901
FBgn0265545	2	0.98556	0.98544	0.999097	15404	0	0.8175	0.014443	0.027023	0.926627	784	2	0.8175
FBgn0027342	6	0.73247	0.78491	0.992082	12076	1	0.45499	0.014472	0.05394	0.954554	785	4	0.45499
FBgn0039158	6	0.16298	0.32272	0.990467	4793	3	-0.031052	0.014495	0.053997	0.954554	786	3	-0.031052
FBgn0020416	6	0.46588	0.61977	0.991024	9392	2	-0.031124	0.014495	0.053997	0.954554	787	2	-0.031124
FBgn0004066	6	0.06547	0.17358	0.990467	2545	3	0.19307	0.014495	0.053997	0.954554	788	3	0.19307
FBgn0265810	4	0.95404	0.95383	0.999097	14902	0	0.58754	0.014515	0.04364	0.954554	789	3	0.58754
FBgn0264565	4	0.19858	0.31925	0.990467	5523	1	0.54257	0.014515	0.04364	0.954554	790	2	0.54257
FBgn0037798	4	0.92966	0.92926	0.999097	14535	0	0.87246	0.014548	0.043719	0.954554	791	3	0.87246
FBgn0033422	6	0.9038	0.90356	0.993146	14122	0	0.72084	0.014556	0.054156	0.954554	792	4	0.72084
FBgn0032639	6	0.084238	0.20953	0.990467	3095	2	0.14994	0.014571	0.054192	0.954554	793	3	0.14994
FBgn0030341	6	0.23141	0.41561	0.990467	6181	2	0.34953	0.014635	0.054361	0.954554	794	3	0.34953
FBgn0264426	6	0.4859	0.6361	0.991024	9622	2	0.13708	0.014706	0.054544	0.954554	795	2	0.13708
FBgn0031253	4	0.24784	0.3746	0.990467	6508	1	0.37179	0.014727	0.044101	0.954554	796	2	0.37179
FBgn0020445	6	0.37088	0.5439	0.99062	8296	2	0.62499	0.014809	0.054824	0.954554	797	3	0.62499
FBgn0033865	6	0.11276	0.25161	0.990467	3746	2	0.23635	0.014809	0.054824	0.954554	798	3	0.23635
FBgn0033222	6	0.27912	0.47377	0.990562	7042	2	0.3448	0.014821	0.054862	0.954554	799	3	0.3448
FBgn0036565	6	0.019276	0.06487	0.987	932	4	-0.37207	0.014847	0.054935	0.954554	800	2	-0.37207
FBgn0266886	1	0.98512	0.98522	0.999097	15397	0	1.1726	0.01488	0.014786	0.901627	801	1	1.1726
FBgn0266811	4	0.43186	0.53709	0.990562	9004	1	0.32316	0.014917	0.044551	0.954554	802	2	0.32316
FBgn0261618	9	0.97016	0.97015	0.999097	15137	0	0.25602	0.014923	0.061671	0.954554	803	5	0.25602
FBgn0032886	5	0.78867	0.79499	0.993146	12549	1	-0.062431	0.014939	0.048602	0.954554	804	2	-0.062431
FBgn0266369	6	0.088636	0.21612	0.990467	3212	1	0.64531	0.01494	0.055166	0.954554	805	4	0.64531
FBgn0029854	6	0.15364	0.30968	0.990467	4610	1	0.52749	0.01499	0.055283	0.954554	806	4	0.52749
FBgn0031948	6	0.068856	0.18105	0.990467	2648	1	0.15594	0.015016	0.055332	0.954554	807	2	0.15594
FBgn0035955	6	0.48636	0.63648	0.991024	9633	1	0.54263	0.015027	0.055356	0.954554	808	3	0.54263
FBgn0266050	6	0.11421	0.25378	0.990467	3777	3	0.020247	0.015027	0.055356	0.954554	809	3	0.020247
FBgn0010287	6	0.45628	0.61195	0.991024	9290	2	0.81373	0.015027	0.055356	0.954554	810	4	0.81373
FBgn0052982	6	0.37804	0.54956	0.990867	8370	1	0.083272	0.015058	0.055437	0.954554	811	1	0.083272
FBgn0026371	5	0.37133	0.51919	0.990562	8301	1	0.52258	0.015124	0.049121	0.954554	812	4	0.52258
FBgn0262739	8	0.022106	0.080045	0.987	1051	3	-0.43639	0.015134	0.061743	0.954554	813	4	-0.43639
FBgn0033715	6	0.033585	0.10023	0.987	1493	2	-0.22946	0.015151	0.05567	0.954554	814	2	-0.22946
FBgn0051549	6	0.9339	0.93375	0.999097	14600	0	0.57277	0.015151	0.05567	0.954554	815	3	0.57277
FBgn0034073	4	0.83529	0.83479	0.993146	13185	0	0.55805	0.015197	0.045157	0.954554	816	3	0.55805
FBgn0262737	7	0.038795	0.12209	0.990467	1660	4	-0.62082	0.015225	0.05671	0.954554	817	3	-0.62082
FBgn0033272	6	0.59649	0.73021	0.992082	10960	1	0.67462	0.015255	0.055932	0.954554	818	4	0.67462
FBgn0267619	4	0.62999	0.65355	0.991098	11225	1	0.49607	0.015291	0.045371	0.954554	819	3	0.49607
FBgn0046294	6	0.18723	0.35621	0.990467	5295	1	-0.16035	0.015301	0.056032	0.954554	820	2	-0.16035
FBgn0030385	6	0.9038	0.90356	0.993146	14221	0	0.61041	0.015305	0.056039	0.954554	821	4	0.61041
FBgn0042083	6	0.9038	0.90356	0.993146	14166	0	-0.040189	0.015305	0.056039	0.954554	822	2	-0.040189
FBgn0037622	4	0.69462	0.70185	0.992082	11740	1	0.74042	0.015377	0.045569	0.954554	823	3	0.74042
FBgn0263605	6	0.53032	0.67297	0.992082	10174	1	0.3429	0.015385	0.056246	0.954554	824	3	0.3429
FBgn0034145	10	0.50693	0.72471	0.992082	9889	2	0.32009	0.015395	0.067714	0.954554	825	5	0.32009
FBgn0039347	6	0.22126	0.40213	0.990467	5982	3	-0.34072	0.01541	0.056301	0.954554	826	1	-0.34072
FBgn0051712	6	0.71619	0.77737	0.992082	11929	1	0.50889	0.015456	0.056418	0.954554	827	4	0.50889
FBgn0053527	6	0.94234	0.94224	0.999097	14728	0	0.09952	0.015468	0.056446	0.954554	828	2	0.09952
FBgn0011300	6	0.47928	0.63061	0.991024	9548	2	-0.14693	0.015481	0.056478	0.954554	829	2	-0.14693
FBgn0034402	6	0.22549	0.40772	0.990467	6058	1	0.44781	0.015491	0.0565	0.954554	830	4	0.44781
FBgn0263980	7	0.019338	0.069172	0.987	936	4	-0.28869	0.015495	0.057547	0.954554	831	3	-0.28869
FBgn0034572	5	0.85788	0.85814	0.993146	13488	0	0.084992	0.01555	0.050347	0.954554	832	2	0.084992
FBgn0085351	6	0.25954	0.45276	0.990467	6734	1	0.028687	0.015551	0.056649	0.954554	833	1	0.028687
FBgn0037446	5	0.81065	0.81319	0.993146	12881	1	0.20184	0.015561	0.050365	0.954554	834	3	0.20184
FBgn0062517	6	0.70903	0.77412	0.992082	11864	1	0.65872	0.01558	0.056707	0.954554	835	4	0.65872
FBgn0010825	4	0.23441	0.35971	0.990467	6233	2	-0.025448	0.015643	0.046187	0.954554	836	2	-0.025448
FBgn0028473	4	0.33916	0.47738	0.990562	7874	1	-0.51019	0.015643	0.046187	0.954554	837	1	-0.51019
FBgn0010388	4	0.47926	0.56186	0.990867	9544	1	0.16946	0.015643	0.046187	0.954554	838	2	0.16946
FBgn0034662	6	0.4428	0.60102	0.991024	9118	1	0.13629	0.015677	0.056954	0.954554	839	3	0.13629
FBgn0024277	8	0.22667	0.44528	0.990467	6080	2	0.39984	0.015697	0.063463	0.954554	840	5	0.39984
FBgn0261617	9	0.64909	0.80282	0.993146	11387	1	0.58538	0.015717	0.06445	0.954554	841	5	0.58538
FBgn0035949	6	0.47519	0.62727	0.991024	9493	1	0.29676	0.015719	0.057054	0.954554	842	4	0.29676
FBgn0038476	8	0.019989	0.074118	0.987	963	5	-0.49554	0.015722	0.063532	0.954554	843	2	-0.49554
FBgn0267176	4	0.97421	0.974	0.999097	15204	0	0.93435	0.015754	0.046419	0.954554	844	3	0.93435
FBgn0004425	6	0.08499	0.21064	0.990467	3112	2	0.60178	0.015801	0.05727	0.954554	845	4	0.60178
FBgn0021872	6	0.52435	0.6679	0.991655	10096	2	0.19272	0.015804	0.057274	0.954554	846	3	0.19272
FBgn0003209	7	0.72846	0.81812	0.993146	12041	1	0.35414	0.015833	0.058601	0.954554	847	3	0.35414
FBgn0033610	6	0.96719	0.96724	0.999097	15085	0	0.46162	0.015838	0.057345	0.954554	848	4	0.46162
FBgn0036940	6	0.99071	0.99073	0.999097	15486	0	0.49967	0.015885	0.057474	0.954554	849	4	0.49967
FBgn0260793	2	0.33376	0.34889	0.990467	7798	1	0.79925	0.015886	0.029646	0.939448	850	1	0.79925
FBgn0016031	7	0.47575	0.6514	0.991098	9507	2	0.44133	0.015907	0.058845	0.954554	851	5	0.44133
FBgn0028397	6	0.86179	0.86456	0.993146	13533	1	0.45041	0.016002	0.057782	0.954554	852	4	0.45041
FBgn0004795	6	0.92483	0.92464	0.999057	14470	0	0.087977	0.016009	0.057798	0.954554	853	2	0.087977
FBgn0037242	6	0.84387	0.8506	0.993146	13285	1	0.40617	0.016023	0.057843	0.954554	854	4	0.40617
FBgn0037068	5	0.13052	0.26589	0.990467	4099	3	-0.43343	0.01603	0.05169	0.954554	855	2	-0.43343
FBgn0003410	6	0.93721	0.93715	0.999097	14647	0	0.046469	0.016114	0.058073	0.954554	856	2	0.046469
FBgn0039958	7	0.92002	0.91992	0.99903	14388	1	0.74065	0.016121	0.059504	0.954554	857	4	0.74065
FBgn0029645	6	0.91725	0.91691	0.99903	14340	0	0.48261	0.016138	0.058137	0.954554	858	4	0.48261
FBgn0034175	6	0.14015	0.29079	0.990467	4310	2	0.014671	0.016148	0.058163	0.954554	859	2	0.014671
FBgn0035872	6	0.10679	0.24284	0.990467	3610	3	-0.2471	0.016184	0.058249	0.954554	860	2	-0.2471
FBgn0043043	6	0.6366	0.74496	0.992082	11282	1	0.40283	0.016191	0.058267	0.954554	861	3	0.40283
FBgn0263982	2	0.98378	0.98369	0.999097	15369	0	1.1182	0.01622	0.030231	0.939448	862	2	1.1182
FBgn0038597	6	0.34309	0.52239	0.990562	7926	2	0.42695	0.016226	0.058356	0.954554	863	4	0.42695
FBgn0003862	6	0.20197	0.37639	0.990467	5588	2	0.58658	0.016226	0.058356	0.954554	864	4	0.58658
FBgn0028647	6	0.45628	0.61195	0.991024	9295	2	0.50469	0.016246	0.058408	0.954554	865	3	0.50469
FBgn0033985	6	0.93258	0.93241	0.999097	14581	0	0.49613	0.016295	0.058537	0.954554	866	4	0.49613
FBgn0005632	4	0.79005	0.78951	0.992082	12639	0	0.62444	0.016366	0.047804	0.954554	867	2	0.62444
FBgn0262126	6	0.063366	0.16895	0.990467	2480	2	-0.027882	0.016367	0.058708	0.954554	868	2	-0.027882
FBgn0263507	4	0.79005	0.78951	0.992082	12676	0	0.14872	0.016371	0.047815	0.954554	869	2	0.14872
FBgn0265894	6	0.95465	0.95461	0.999097	14911	0	0.041701	0.016395	0.058777	0.954554	870	2	0.041701
FBgn0035686	6	0.44552	0.60317	0.991024	9155	2	-0.16912	0.016437	0.058878	0.954554	871	2	-0.16912
FBgn0033051	6	0.34299	0.52231	0.990562	7925	1	0.40762	0.016437	0.058878	0.954554	872	3	0.40762
FBgn0032002	6	0.48723	0.63718	0.991024	9644	2	0.42354	0.016438	0.05888	0.954554	873	4	0.42354
FBgn0003882	6	0.21576	0.39475	0.990467	5879	3	0.069299	0.01644	0.058884	0.954554	874	3	0.069299
FBgn0262961	6	0.87697	0.87757	0.993146	13742	1	0.29263	0.016456	0.058935	0.954554	875	3	0.29263
FBgn0265995	3	0.98354	0.98366	0.999097	15362	0	0.38556	0.016457	0.04305	0.954554	876	3	0.38556
FBgn0033397	6	0.83841	0.8467	0.993146	13224	1	-0.034594	0.016466	0.058961	0.954554	877	1	-0.034594
FBgn0039150	1	0.98348	0.98361	0.999097	15360	0	2.2675	0.01652	0.016453	0.901627	878	1	2.2675
FBgn0039079	6	0.34738	0.52568	0.990562	7975	2	0.57427	0.016524	0.059124	0.954554	879	4	0.57427
FBgn0050393	6	0.24145	0.42902	0.990467	6375	2	0.62234	0.016536	0.059156	0.954554	880	4	0.62234
FBgn0037807	6	0.17969	0.34592	0.990467	5137	2	0.079963	0.016566	0.059243	0.954554	881	3	0.079963
FBgn0034126	6	0.94349	0.94333	0.999097	14741	0	0.4751	0.016566	0.059243	0.954554	882	4	0.4751
FBgn0026262	4	0.029221	0.074905	0.987	1324	1	0.77143	0.016579	0.04825	0.954554	883	3	0.77143
FBgn0037326	6	0.58214	0.71754	0.992082	10797	1	0.10067	0.016663	0.059514	0.954554	884	2	0.10067
FBgn0267066	4	0.029648	0.075792	0.987	1340	2	-0.54274	0.016677	0.048462	0.954554	885	1	-0.54274
FBgn0051300	6	0.29296	0.48412	0.990562	7236	2	0.0061415	0.016712	0.059629	0.954554	886	2	0.0061415
FBgn0037848	6	0.03875	0.11254	0.990467	1656	4	-0.39719	0.016712	0.059629	0.954554	887	1	-0.39719
FBgn0039342	6	0.16769	0.32922	0.990467	4898	1	0.31986	0.016723	0.05965	0.954554	888	3	0.31986
FBgn0002868	4	0.2941	0.42667	0.990467	7250	1	0.39862	0.016747	0.048617	0.954554	889	2	0.39862
FBgn0040252	6	0.22925	0.41279	0.990467	6139	3	-0.13866	0.016809	0.05986	0.954554	890	2	-0.13866
FBgn0004174	6	0.41211	0.57653	0.990867	8782	2	-0.032699	0.016809	0.05986	0.954554	891	2	-0.032699
FBgn0036728	6	0.09538	0.22616	0.990467	3358	2	0.075876	0.016817	0.059883	0.954554	892	1	0.075876
FBgn0025700	4	0.97942	0.97937	0.999097	15302	0	0.94513	0.016825	0.048786	0.954554	893	3	0.94513
FBgn0021856	6	0.52584	0.66917	0.991793	10121	1	0.7298	0.016847	0.059954	0.954554	894	4	0.7298
FBgn0261479	4	0.11546	0.2249	0.990467	3803	1	-0.010003	0.016911	0.048979	0.954554	895	2	-0.010003
FBgn0031310	4	0.0098893	0.032278	0.987	548	3	-0.67839	0.016911	0.048979	0.954554	896	1	-0.67839
FBgn0038274	4	0.14189	0.25496	0.990467	4352	1	0.056303	0.016911	0.048979	0.954554	897	1	0.056303
FBgn0036610	6	0.10587	0.2415	0.990467	3590	3	-0.094141	0.016993	0.060316	0.954554	898	3	-0.094141
FBgn0039703	6	0.98434	0.98439	0.999097	15383	0	0.23926	0.017006	0.060353	0.954554	899	3	0.23926
FBgn0031603	4	0.3067	0.4409	0.990467	7420	2	0.055114	0.017076	0.049345	0.954554	900	2	0.055114
FBgn0052475	6	0.17874	0.34461	0.990467	5111	2	0.25307	0.017136	0.060653	0.954554	901	3	0.25307
FBgn0035670	6	0.38926	0.55842	0.990867	8511	2	-0.11676	0.017169	0.06074	0.954554	902	2	-0.11676
FBgn0052671	4	0.96577	0.96558	0.999097	15058	0	0.83952	0.017198	0.049616	0.954554	903	3	0.83952
FBgn0031157	6	0.5169	0.66173	0.991655	10008	2	-0.10686	0.017239	0.060927	0.954554	904	1	-0.10686
FBgn0267210	4	0.60877	0.63892	0.991024	11064	1	-0.0095391	0.017263	0.049765	0.954554	905	1	-0.0095391
FBgn0266619	4	0.15187	0.26627	0.990467	4562	2	-0.079464	0.017265	0.049766	0.954554	906	2	-0.079464
FBgn0032262	6	0.50623	0.65289	0.991098	9878	1	0.49319	0.017333	0.061175	0.954554	907	4	0.49319
FBgn0050281	6	0.03641	0.10701	0.990201	1586	2	0.59685	0.017333	0.061175	0.954554	908	4	0.59685
FBgn0015001	6	0.95038	0.95026	0.999097	14843	0	0.12864	0.01735	0.06121	0.954554	909	3	0.12864
FBgn0051100	6	0.84498	0.8514	0.993146	13302	1	0.31485	0.01738	0.061296	0.954554	910	3	0.31485
FBgn0265605	6	0.0014244	0.0067442	0.91437	93	4	-0.66784	0.01745	0.061475	0.954554	911	1	-0.66784
FBgn0265075	4	0.64459	0.66393	0.991655	11341	1	0.64967	0.017475	0.050224	0.954554	912	3	0.64967
FBgn0033538	6	0.32467	0.50817	0.990562	7692	2	0.24469	0.01751	0.061616	0.954554	913	3	0.24469
FBgn0053099	6	0.23811	0.42459	0.990467	6312	2	0.5967	0.01752	0.061638	0.954554	914	4	0.5967
FBgn0267811	4	0.79005	0.78951	0.992082	12601	0	0.68685	0.017527	0.050347	0.954554	915	3	0.68685
FBgn0033763	6	0.30463	0.49288	0.990562	7385	1	0.52586	0.017537	0.061675	0.954554	916	4	0.52586
FBgn0037671	6	0.027247	0.084744	0.987	1246	1	0.41573	0.017598	0.061835	0.954554	917	3	0.41573
FBgn0051436	6	0.875	0.87584	0.993146	13711	1	0.019446	0.017609	0.061866	0.954554	918	2	0.019446
FBgn0034457	6	0.69007	0.76608	0.992082	11701	1	0.27237	0.017654	0.061998	0.954554	919	3	0.27237
FBgn0010611	10	0.13883	0.34369	0.990467	4284	3	0.29041	0.0177	0.074982	0.954554	920	5	0.29041
FBgn0036157	6	0.47965	0.6309	0.991024	9552	1	0.3691	0.01777	0.06232	0.954554	921	3	0.3691
FBgn0263874	4	0.95383	0.95364	0.999097	14897	0	0.61023	0.017779	0.050893	0.954554	922	3	0.61023
FBgn0264792	4	0.52524	0.58736	0.991024	10111	1	0.88437	0.017789	0.050918	0.954554	923	2	0.88437
FBgn0034940	4	0.60546	0.63676	0.991024	11032	1	0.86787	0.017789	0.050918	0.954554	924	3	0.86787
FBgn0263852	4	0.81957	0.81905	0.993146	12977	0	0.78462	0.017789	0.050918	0.954554	925	3	0.78462
FBgn0050101	6	0.77544	0.80686	0.993146	12477	1	0.32062	0.017836	0.062491	0.954554	926	3	0.32062
FBgn0035439	6	0.23761	0.42394	0.990467	6303	3	-0.31722	0.017836	0.062491	0.954554	927	1	-0.31722
FBgn0032836	6	0.37008	0.54327	0.99062	8286	2	0.21261	0.017843	0.062506	0.954554	928	3	0.21261
FBgn0032701	6	0.39849	0.56573	0.990867	8624	1	0.42395	0.017876	0.062591	0.954554	929	4	0.42395
FBgn0011474	6	0.10509	0.24041	0.990467	3567	3	0.2455	0.017988	0.062898	0.954554	930	3	0.2455
FBgn0265423	6	0.9038	0.90356	0.993146	14228	0	0.52874	0.017988	0.062898	0.954554	931	4	0.52874
FBgn0024558	6	0.33424	0.5155	0.990562	7807	2	0.51279	0.017988	0.062898	0.954554	932	3	0.51279
FBgn0035914	2	0.98194	0.98188	0.999097	15340	0	0.42308	0.018061	0.033533	0.942699	933	2	0.42308
FBgn0283535	5	0.013887	0.04536	0.987	734	2	0.93347	0.018117	0.05754	0.954554	934	3	0.93347
FBgn0043012	5	0.080307	0.1823	0.990467	2990	1	1.1663	0.018117	0.05754	0.954554	935	3	1.1663
FBgn0085438	6	0.98165	0.98168	0.999097	15335	0	0.30793	0.018157	0.063323	0.954554	936	4	0.30793
FBgn0040388	6	0.063121	0.16835	0.990467	2474	2	0.47972	0.018191	0.063424	0.954554	937	3	0.47972
FBgn0032858	4	0.79005	0.78951	0.992082	12629	0	0.34536	0.018201	0.051825	0.954554	938	2	0.34536
FBgn0262937	6	0.99056	0.99059	0.999097	15484	0	0.48796	0.018235	0.06354	0.954554	939	4	0.48796
FBgn0261714	6	0.14193	0.29319	0.990467	4353	3	-0.10373	0.018291	0.063681	0.954554	940	2	-0.10373
FBgn0030756	6	0.13166	0.27877	0.990467	4119	2	0.24587	0.018291	0.063681	0.954554	941	3	0.24587
FBgn0046689	6	0.077091	0.19882	0.990467	2907	3	0.59161	0.018291	0.063681	0.954554	942	3	0.59161
FBgn0040298	4	0.40003	0.5214	0.990562	8646	1	0.32634	0.018321	0.052102	0.954554	943	2	0.32634
FBgn0264979	6	0.57289	0.70947	0.992082	10672	1	0.50513	0.018363	0.063864	0.954554	944	3	0.50513
FBgn0261988	6	0.013698	0.050435	0.987	725	3	-0.11436	0.018384	0.063911	0.954554	945	3	-0.11436
FBgn0023178	6	0.85421	0.85841	0.993146	13412	1	0.56988	0.018505	0.064223	0.954554	946	4	0.56988
FBgn0031247	4	0.26889	0.39833	0.990467	6905	1	0.12191	0.018521	0.052537	0.954554	947	2	0.12191
FBgn0039212	4	0.98374	0.98372	0.999097	15368	0	0.62935	0.018539	0.052572	0.954554	948	3	0.62935
FBgn0264439	4	0.95331	0.95312	0.999097	14891	0	0.65081	0.018539	0.052572	0.954554	949	3	0.65081
FBgn0262611	6	0.28192	0.47586	0.990562	7081	2	0.094579	0.018539	0.064311	0.954554	950	2	0.094579
FBgn0040958	6	0.87921	0.87958	0.993146	13772	1	0.69566	0.018646	0.064575	0.954554	951	4	0.69566
FBgn0026257	4	0.3021	0.43573	0.990467	7353	2	0.27427	0.01865	0.052815	0.954554	952	2	0.27427
FBgn0265688	4	0.70244	0.70819	0.992082	11813	1	-0.031368	0.01867	0.052854	0.954554	953	1	-0.031368
FBgn0051777	6	0.13753	0.28711	0.990467	4251	3	-0.31708	0.018714	0.064755	0.954554	954	2	-0.31708
FBgn0030929	2	0.98127	0.98124	0.999097	15332	0	1.0673	0.018727	0.03472	0.95047	955	2	1.0673
FBgn0010263	8	0.51768	0.70826	0.992082	10021	2	0.46617	0.01876	0.072207	0.954554	956	5	0.46617
FBgn0052686	6	0.98049	0.98051	0.999097	15319	0	0.60176	0.018787	0.06495	0.954554	957	4	0.60176
FBgn0034990	6	0.6174	0.73794	0.992082	11123	1	0.25799	0.018787	0.06495	0.954554	958	3	0.25799
FBgn0264717	1	0.98119	0.98131	0.999097	15330	0	1.6618	0.018814	0.018794	0.901627	959	1	1.6618
FBgn0085265	6	0.9038	0.90356	0.993146	14108	0	0.78336	0.018893	0.065237	0.954554	960	4	0.78336
FBgn0051343	6	0.9038	0.90356	0.993146	14009	0	0.56457	0.018902	0.06526	0.954554	961	3	0.56457
FBgn0265158	6	0.15439	0.31072	0.990467	4626	2	-0.080118	0.018915	0.065301	0.954554	962	2	-0.080118
FBgn0261477	4	0.83435	0.83384	0.993146	13172	0	0.29477	0.018928	0.053433	0.954554	963	2	0.29477
FBgn0014019	5	0.62366	0.69233	0.992082	11175	1	0.41356	0.018936	0.059818	0.954554	964	3	0.41356
FBgn0053337	6	0.57236	0.70902	0.992082	10665	2	0.0019428	0.018972	0.065449	0.954554	965	2	0.0019428
FBgn0029672	6	0.96037	0.96041	0.999097	14990	0	0.24416	0.018995	0.065501	0.954554	966	3	0.24416
FBgn0033101	6	0.96909	0.96919	0.999097	15119	0	0.49389	0.019018	0.065551	0.954554	967	3	0.49389
FBgn0037814	6	0.60584	0.73391	0.992082	11036	1	0.44929	0.019018	0.065551	0.954554	968	3	0.44929
FBgn0010228	8	0.6863	0.80838	0.993146	11659	1	0.21103	0.019079	0.073121	0.954554	969	4	0.21103
FBgn0053258	6	0.074464	0.19318	0.990467	2831	2	0.22898	0.019081	0.065705	0.954554	970	2	0.22898
FBgn0038930	6	0.79804	0.81996	0.993146	12776	1	0.22661	0.019081	0.065705	0.954554	971	4	0.22661
FBgn0262686	6	0.28666	0.47938	0.990562	7144	2	0.039499	0.01912	0.065805	0.954554	972	3	0.039499
FBgn0028939	6	0.48768	0.63755	0.991024	9651	2	0.12185	0.019242	0.066138	0.954554	973	3	0.12185
FBgn0016076	8	0.16311	0.35699	0.990467	4801	2	0.58011	0.019319	0.07381	0.954554	974	5	0.58011
FBgn0035372	4	0.30507	0.43909	0.990467	7391	2	0.21756	0.019326	0.05436	0.954554	975	2	0.21756
FBgn0031304	6	0.864	0.86643	0.993146	13567	1	0.078723	0.019346	0.066402	0.954554	976	3	0.078723
FBgn0083986	6	0.16827	0.33003	0.990467	4906	1	0.24615	0.019352	0.066415	0.954554	977	3	0.24615
FBgn0266800	4	0.93779	0.93755	0.999097	14660	0	0.50678	0.019386	0.054495	0.954554	978	2	0.50678
FBgn0263617	6	0.30051	0.48976	0.990562	7328	2	0.53836	0.019416	0.066563	0.954554	979	4	0.53836
FBgn0052944	7	0.27599	0.47704	0.990562	7000	3	-0.062194	0.019475	0.069926	0.954554	980	3	-0.062194
FBgn0033236	6	0.15122	0.30622	0.990467	4541	1	0.18539	0.019508	0.066782	0.954554	981	3	0.18539
FBgn0033911	6	0.074787	0.19387	0.990467	2841	2	0.26826	0.019508	0.066782	0.954554	982	4	0.26826
FBgn0039595	5	0.9737	0.97378	0.999097	15196	0	0.080627	0.019516	0.061475	0.954554	983	2	0.080627
FBgn0029999	5	0.11947	0.24798	0.990467	3875	3	-0.37893	0.019516	0.061475	0.954554	984	1	-0.37893
FBgn0267133	4	0.34093	0.47935	0.990562	7894	2	0.1786	0.019517	0.054798	0.954554	985	2	0.1786
FBgn0036949	6	0.67713	0.76072	0.992082	11583	1	0.31688	0.01953	0.066828	0.954554	986	4	0.31688
FBgn0037042	6	0.18951	0.35936	0.990467	5332	1	0.36291	0.019554	0.066889	0.954554	987	4	0.36291
FBgn0003430	6	0.82191	0.8351	0.993146	13004	1	0.14677	0.019556	0.066893	0.954554	988	3	0.14677
FBgn0011725	6	0.033606	0.10028	0.987	1495	3	0.12791	0.019577	0.066952	0.954554	989	3	0.12791
FBgn0030086	6	0.46897	0.62224	0.991024	9421	2	-0.2119	0.019612	0.06704	0.954554	990	2	-0.2119
FBgn0028476	6	0.016453	0.057488	0.987	825	3	-0.41666	0.019626	0.067077	0.954554	991	1	-0.41666
FBgn0085461	3	0.95174	0.95207	0.999097	14863	0	1.2442	0.019651	0.050762	0.954554	992	2	1.2442
FBgn0267529	4	0.92998	0.92959	0.999097	14543	0	0.68961	0.01967	0.055104	0.954554	993	3	0.68961
FBgn0029751	6	0.015078	0.054018	0.987	782	2	-0.14641	0.019697	0.067251	0.954554	994	1	-0.14641
FBgn0011763	6	0.30434	0.49267	0.990562	7381	2	0.10887	0.019767	0.067425	0.954554	995	1	0.10887
FBgn0028507	6	0.95782	0.9578	0.999097	14958	0	0.63222	0.019835	0.067607	0.954554	996	4	0.63222
FBgn0038158	6	0.41462	0.57847	0.990867	8812	2	-0.059757	0.019907	0.067778	0.954554	997	2	-0.059757
FBgn0085485	6	0.38822	0.55758	0.990867	8499	2	-0.056859	0.01991	0.067781	0.954554	998	2	-0.056859
FBgn0065083	4	0.033491	0.083914	0.987	1490	1	0.66143	0.019934	0.055667	0.954554	999	3	0.66143
FBgn0039467	6	0.082746	0.20729	0.990467	3060	1	0.5707	0.019935	0.067851	0.954554	1000	4	0.5707
FBgn0265632	6	0.67288	0.759	0.992082	11549	1	0.68509	0.019992	0.067979	0.954554	1001	4	0.68509
FBgn0029892	6	0.38629	0.55602	0.990867	8469	2	0.28725	0.020033	0.06809	0.954554	1002	3	0.28725
FBgn0039419	6	0.97924	0.97927	0.999097	15299	0	0.33896	0.02004	0.068116	0.954554	1003	3	0.33896
FBgn0040070	6	0.026446	0.082795	0.987	1207	1	0.21478	0.020047	0.068135	0.954554	1004	2	0.21478
FBgn0085384	5	0.13625	0.27518	0.990467	4221	1	0.20426	0.020091	0.063033	0.954554	1005	2	0.20426
FBgn0051087	6	0.24355	0.43182	0.990467	6422	1	0.70532	0.020092	0.068259	0.954554	1006	4	0.70532
FBgn0035235	1	0.9799	0.98002	0.999097	15308	0	2.1041	0.020098	0.020097	0.901627	1007	1	2.1041
FBgn0037526	6	0.47742	0.62909	0.991024	9521	2	0.21704	0.020109	0.068301	0.954554	1008	3	0.21704
FBgn0032318	6	0.35687	0.53304	0.990562	8110	2	0.45591	0.020117	0.068321	0.954554	1009	3	0.45591
FBgn0265703	4	0.51174	0.57958	0.990867	9952	1	-0.02728	0.020123	0.056096	0.954554	1010	1	-0.02728
FBgn0259979	6	0.025992	0.081698	0.987	1190	1	0.62463	0.020136	0.068375	0.954554	1011	3	0.62463
FBgn0053626	6	0.59086	0.72522	0.992082	10905	1	0.47601	0.020136	0.068375	0.954554	1012	3	0.47601
FBgn0035610	5	0.41221	0.5583	0.990867	8784	2	0.34456	0.020173	0.063236	0.954554	1013	2	0.34456
FBgn0250819	6	0.070108	0.18379	0.990467	2682	2	0.63334	0.020191	0.068503	0.954554	1014	4	0.63334
FBgn0010342	6	0.9038	0.90356	0.993146	14101	0	0.44005	0.020191	0.068503	0.954554	1015	4	0.44005
FBgn0032691	6	0.99299	0.99302	0.999185	15528	0	0.75394	0.020191	0.068503	0.954554	1016	4	0.75394
FBgn0003392	6	0.87807	0.87855	0.993146	13758	1	0.47581	0.020193	0.068507	0.954554	1017	3	0.47581
FBgn0038053	6	0.30652	0.49435	0.990562	7418	2	0.35078	0.020193	0.068507	0.954554	1018	3	0.35078
FBgn0028707	6	0.41693	0.58029	0.990867	8837	2	0.4841	0.020193	0.068507	0.954554	1019	4	0.4841
FBgn0035481	10	0.016457	0.069385	0.987	827	3	0.039534	0.020196	0.082806	0.954554	1020	4	0.039534
FBgn0061196	5	0.31946	0.47013	0.990562	7596	2	0.76279	0.020279	0.06349	0.954554	1021	3	0.76279
FBgn0265191	4	0.55643	0.6057	0.991024	10501	1	0.46721	0.020285	0.056433	0.954554	1022	2	0.46721
FBgn0033650	5	0.50706	0.64018	0.991024	9892	1	0.30565	0.020289	0.063524	0.954554	1023	4	0.30565
FBgn0266251	4	0.60546	0.63676	0.991024	11033	1	0.5933	0.020352	0.056584	0.954554	1024	3	0.5933
FBgn0021768	4	0.73111	0.73286	0.992082	12064	1	0.05192	0.020357	0.056594	0.954554	1025	1	0.05192
FBgn0039048	6	0.45904	0.61419	0.991024	9316	2	-0.041097	0.020363	0.068913	0.954554	1026	1	-0.041097
FBgn0014464	6	0.51051	0.65642	0.991098	9931	1	0.40337	0.020368	0.068929	0.954554	1027	3	0.40337
FBgn0039406	6	0.94433	0.94415	0.999097	14757	0	0.51936	0.020383	0.06896	0.954554	1028	4	0.51936
FBgn0031558	6	0.83253	0.84242	0.993146	13150	1	0.54017	0.020383	0.06896	0.954554	1029	4	0.54017
FBgn0263765	4	0.04592	0.10967	0.990467	1887	1	0.62993	0.020387	0.056667	0.954554	1030	3	0.62993
FBgn0030996	6	0.9038	0.90356	0.993146	14078	0	0.64368	0.020392	0.06898	0.954554	1031	3	0.64368
FBgn0036746	6	0.19566	0.36769	0.990467	5462	1	0.035435	0.020392	0.06898	0.954554	1032	2	0.035435
FBgn0034491	4	0.17854	0.29656	0.990467	5108	2	-0.50156	0.020403	0.0567	0.954554	1033	1	-0.50156
FBgn0053552	5	0.46575	0.61038	0.991024	9381	1	0.059343	0.020411	0.063863	0.954554	1034	2	0.059343
FBgn0033696	4	0.983	0.98302	0.999097	15353	0	0.40914	0.02045	0.056807	0.954554	1035	3	0.40914
FBgn0266768	4	0.82865	0.82811	0.993146	13096	0	0.7243	0.02048	0.056873	0.954554	1036	2	0.7243
FBgn0267532	4	0.15107	0.26536	0.990467	4539	1	0.5429	0.020497	0.056913	0.954554	1037	3	0.5429
FBgn0034005	6	0.79256	0.81654	0.993146	12737	1	0.48413	0.020534	0.069322	0.954554	1038	3	0.48413
FBgn0020299	12	0.26997	0.54292	0.990562	6931	3	0.018446	0.020611	0.089293	0.954554	1039	5	0.018446
FBgn0262139	6	0.52282	0.66664	0.991655	10075	1	0.23426	0.02067	0.069664	0.954554	1040	4	0.23426
FBgn0037254	6	0.49649	0.64484	0.991024	9769	1	0.42585	0.02067	0.069664	0.954554	1041	3	0.42585
FBgn0035733	6	0.98418	0.98423	0.999097	15378	0	0.83485	0.02067	0.069664	0.954554	1042	4	0.83485
FBgn0036102	6	0.01333	0.049456	0.987	711	2	-0.059424	0.02067	0.069664	0.954554	1043	2	-0.059424
FBgn0034165	6	0.6655	0.75603	0.992082	11491	1	0.19034	0.020678	0.069688	0.954554	1044	2	0.19034
FBgn0033523	1	0.97929	0.97942	0.999097	15301	0	0.80651	0.02071	0.020675	0.901627	1045	1	0.80651
FBgn0261292	6	0.47812	0.62968	0.991024	9528	1	0.38173	0.020745	0.06984	0.954554	1046	3	0.38173
FBgn0034599	6	0.80004	0.82119	0.993146	12790	1	0.22923	0.020783	0.069948	0.954554	1047	4	0.22923
FBgn0029113	6	0.39148	0.5602	0.990867	8532	1	0.19487	0.020795	0.069986	0.954554	1048	3	0.19487
FBgn0031155	6	0.38821	0.55757	0.990867	8498	2	-0.20373	0.020891	0.070244	0.954554	1049	2	-0.20373
FBgn0026149	6	0.85133	0.85616	0.993146	13362	1	0.29554	0.020891	0.070244	0.954554	1050	4	0.29554
FBgn0014029	6	0.98768	0.98768	0.999097	15436	0	0.45597	0.020891	0.070244	0.954554	1051	4	0.45597
FBgn0034081	4	0.151	0.26528	0.990467	4537	2	-0.16887	0.020895	0.057753	0.954554	1052	1	-0.16887
FBgn0030599	4	0.32072	0.45664	0.990467	7618	2	0.20638	0.020957	0.057893	0.954554	1053	2	0.20638
FBgn0035059	6	0.011179	0.042755	0.987	607	2	0.37592	0.020969	0.070431	0.954554	1054	3	0.37592
FBgn0040309	8	0.64538	0.78238	0.992082	11349	1	0.24183	0.02099	0.078452	0.954554	1055	4	0.24183
FBgn0037317	6	0.80674	0.82526	0.993146	12838	1	0.3365	0.021036	0.070596	0.954554	1056	4	0.3365
FBgn0266789	4	0.17132	0.28837	0.990467	4974	1	0.66361	0.021078	0.058146	0.954554	1057	3	0.66361
FBgn0034523	5	0.37217	0.51997	0.990562	8307	1	0.056961	0.021083	0.065739	0.954554	1058	2	0.056961
FBgn0028690	6	0.0090559	0.035217	0.987	512	3	0.033748	0.021126	0.070828	0.954554	1059	3	0.033748
FBgn0015572	6	0.9668	0.96686	0.999097	15077	0	0.5575	0.021126	0.070828	0.954554	1060	3	0.5575
FBgn0027600	6	0.98473	0.98476	0.999097	15389	0	0.46753	0.021126	0.070828	0.954554	1061	3	0.46753
FBgn0034099	6	0.20197	0.37638	0.990467	5585	1	-0.25365	0.021126	0.070828	0.954554	1062	3	-0.25365
FBgn0050338	2	0.75884	0.75824	0.992082	12334	0	0.90021	0.021126	0.039037	0.954554	1063	1	0.90021
FBgn0262140	6	0.42957	0.59047	0.991024	8972	2	0.23892	0.021134	0.070846	0.954554	1064	3	0.23892
FBgn0032495	6	0.99032	0.99036	0.999097	15479	0	0.681	0.021168	0.070932	0.954554	1065	4	0.681
FBgn0035627	6	0.66946	0.75764	0.992082	11518	1	0.58729	0.021168	0.070932	0.954554	1066	4	0.58729
FBgn0045064	6	0.22491	0.40695	0.990467	6045	3	-0.089198	0.021233	0.071083	0.954554	1067	2	-0.089198
FBgn0085376	6	0.53298	0.67522	0.992082	10203	2	0.0029216	0.021239	0.071099	0.954554	1068	2	0.0029216
FBgn0034989	6	0.25053	0.44103	0.990467	6557	2	0.2309	0.021293	0.071226	0.954554	1069	2	0.2309
FBgn0010314	6	0.38649	0.55618	0.990867	8472	1	0.32478	0.021309	0.071265	0.954554	1070	3	0.32478
FBgn0030121	4	0.79005	0.78951	0.992082	12560	0	0.31614	0.021363	0.058754	0.954554	1071	2	0.31614
FBgn0051467	4	0.96651	0.96631	0.999097	15070	0	0.3827	0.021363	0.058754	0.954554	1072	2	0.3827
FBgn0023511	4	0.65139	0.66877	0.991793	11397	1	0.022957	0.021363	0.058754	0.954554	1073	1	0.022957
FBgn0265532	4	0.11608	0.22557	0.990467	3813	2	0.4176	0.021363	0.058754	0.954554	1074	2	0.4176
FBgn0083969	4	0.75102	0.75112	0.992082	12260	1	0.60953	0.021377	0.058777	0.954554	1075	3	0.60953
FBgn0261057	6	0.43699	0.59649	0.991024	9059	1	0.13344	0.021379	0.071451	0.954554	1076	2	0.13344
FBgn0036597	6	0.13184	0.27903	0.990467	4124	3	-0.19832	0.021383	0.071461	0.954554	1077	2	-0.19832
FBgn0034937	6	0.85933	0.86252	0.993146	13507	1	0.42446	0.021402	0.071522	0.954554	1078	3	0.42446
FBgn0027601	7	0.4966	0.66529	0.991655	9770	1	0.33676	0.021429	0.07588	0.954554	1079	5	0.33676
FBgn0039800	6	0.9788	0.97885	0.999097	15290	0	0.12455	0.021449	0.071651	0.954554	1080	2	0.12455
FBgn0039378	6	0.15873	0.31679	0.990467	4713	3	-0.043129	0.021452	0.071657	0.954554	1081	3	-0.043129
FBgn0047095	6	0.31689	0.50214	0.990562	7568	1	-0.28644	0.021516	0.071824	0.954554	1082	2	-0.28644
FBgn0052732	6	0.8864	0.88635	0.993146	13871	1	-0.15041	0.02154	0.071882	0.954554	1083	2	-0.15041
FBgn0030356	4	0.47641	0.56031	0.990867	9509	1	0.38054	0.021564	0.059195	0.954554	1084	2	0.38054
FBgn0031117	6	0.9038	0.90356	0.993146	14123	0	0.49959	0.021595	0.072023	0.954554	1085	4	0.49959
FBgn0033392	3	0.11	0.1883	0.990467	3690	1	0.72848	0.021688	0.055842	0.954554	1086	2	0.72848
FBgn0020270	6	0.91669	0.91634	0.99903	14330	0	0.44113	0.021783	0.072478	0.954554	1087	4	0.44113
FBgn0261938	6	0.18387	0.35169	0.990467	5218	2	-0.24601	0.021799	0.072513	0.954554	1088	1	-0.24601
FBgn0266000	8	0.94039	0.94091	0.999097	14701	1	0.51299	0.021819	0.080734	0.954554	1089	5	0.51299
FBgn0004860	6	0.92907	0.92889	0.999097	14529	0	0.39501	0.021849	0.072622	0.954554	1090	4	0.39501
FBgn0038797	7	0.42049	0.61511	0.991024	8879	1	0.15861	0.021851	0.077186	0.954554	1091	4	0.15861
FBgn0037462	6	0.7898	0.81494	0.993146	12556	1	0.25863	0.021881	0.072701	0.954554	1092	3	0.25863
FBgn0267690	6	0.14545	0.29815	0.990467	4418	1	0.6491	0.021882	0.072705	0.954554	1093	4	0.6491
FBgn0032120	4	0.52998	0.59007	0.991024	10170	1	-0.111	0.021901	0.059922	0.954554	1094	1	-0.111
FBgn0036305	4	0.97314	0.97292	0.999097	15190	0	0.52038	0.021904	0.059934	0.954554	1095	3	0.52038
FBgn0043534	6	0.58537	0.72039	0.992082	10836	1	0.5657	0.021939	0.072838	0.954554	1096	3	0.5657
FBgn0034396	4	0.16629	0.2827	0.990467	4863	2	-0.28357	0.021947	0.060019	0.954554	1097	1	-0.28357
FBgn0267462	4	0.74453	0.745	0.992082	12184	1	0.45345	0.021968	0.060058	0.954554	1098	3	0.45345
FBgn0052066	4	0.51702	0.58258	0.991024	10011	1	0.22919	0.022088	0.060326	0.954554	1099	2	0.22919
FBgn0034897	6	0.046389	0.13043	0.990467	1903	3	-0.024507	0.022093	0.073206	0.954554	1100	3	-0.024507
FBgn0050275	6	0.97501	0.97506	0.999097	15219	0	0.68617	0.022093	0.073206	0.954554	1101	3	0.68617
FBgn0031811	6	0.17949	0.34565	0.990467	5135	1	0.28026	0.022093	0.073206	0.954554	1102	3	0.28026
FBgn0034654	6	0.50027	0.64791	0.991024	9811	2	0.54537	0.022093	0.073206	0.954554	1103	4	0.54537
FBgn0037250	6	0.47337	0.62579	0.991024	9477	1	0.35534	0.022093	0.073206	0.954554	1104	3	0.35534
FBgn0262366	6	0.9527	0.95264	0.999097	14877	0	0.26033	0.022093	0.073206	0.954554	1105	3	0.26033
FBgn0031848	6	0.50675	0.6533	0.991098	9885	2	0.50197	0.022093	0.073206	0.954554	1106	3	0.50197
FBgn0032751	6	0.72978	0.78361	0.992082	12052	1	0.29881	0.022093	0.073206	0.954554	1107	3	0.29881
FBgn0053285	6	0.98977	0.9898	0.999097	15472	0	0.85633	0.022093	0.073206	0.954554	1108	4	0.85633
FBgn0032516	6	0.96285	0.9629	0.999097	15024	0	0.85413	0.022093	0.073206	0.954554	1109	4	0.85413
FBgn0016672	6	0.43098	0.59164	0.991024	8999	1	0.53252	0.022093	0.073206	0.954554	1110	3	0.53252
FBgn0085474	6	0.94548	0.94532	0.999097	14777	0	0.37666	0.022149	0.073358	0.954554	1111	3	0.37666
FBgn0032538	6	0.96401	0.96409	0.999097	15037	0	0.25979	0.022197	0.073482	0.954554	1112	4	0.25979
FBgn0033354	6	0.42214	0.58451	0.991024	8895	2	0.072048	0.022219	0.073532	0.954554	1113	2	0.072048
FBgn0028514	6	0.17631	0.34128	0.990467	5073	1	-0.26615	0.022324	0.073803	0.954554	1114	2	-0.26615
FBgn0005638	6	0.29052	0.48233	0.990562	7203	2	0.53245	0.022335	0.073832	0.954554	1115	4	0.53245
FBgn0003129	6	0.1952	0.36711	0.990467	5454	2	0.56563	0.022335	0.073832	0.954554	1116	4	0.56563
FBgn0265381	4	0.61185	0.64101	0.991024	11082	1	0.31661	0.022375	0.060925	0.954554	1117	2	0.31661
FBgn0030851	5	0.91085	0.91111	0.998401	14272	0	0.71	0.022386	0.069309	0.954554	1118	3	0.71
FBgn0037606	6	0.1214	0.2641	0.990467	3911	2	-0.27945	0.022429	0.074076	0.954554	1119	3	-0.27945
FBgn0033446	2	0.35201	0.36452	0.990467	8031	1	0.99676	0.02249	0.041511	0.954554	1120	1	0.99676
FBgn0028940	3	0.96779	0.96796	0.999097	15098	0	0.36414	0.022534	0.057855	0.954554	1121	2	0.36414
FBgn0032797	6	0.35851	0.53431	0.990562	8136	1	0.21004	0.022569	0.074399	0.954554	1122	3	0.21004
FBgn0051410	2	0.97743	0.97731	0.999097	15268	0	0.65044	0.022574	0.041686	0.954554	1123	2	0.65044
FBgn0267722	4	0.38529	0.51423	0.990562	8458	1	0.25937	0.022625	0.06146	0.954554	1124	1	0.25937
FBgn0003117	6	0.77687	0.80764	0.993146	12487	1	0.435	0.022674	0.074662	0.954554	1125	3	0.435
FBgn0036291	4	0.31811	0.45371	0.990467	7585	2	0.26231	0.022683	0.061595	0.954554	1126	2	0.26231
FBgn0031474	6	0.7978	0.81982	0.993146	12773	1	0.32678	0.022692	0.074709	0.954554	1127	3	0.32678
FBgn0250833	6	0.27969	0.4742	0.990562	7048	1	-0.16534	0.022692	0.074709	0.954554	1128	2	-0.16534
FBgn0004852	6	0.043029	0.12259	0.990467	1799	2	0.63653	0.022692	0.074709	0.954554	1129	4	0.63653
FBgn0000964	6	0.063387	0.16899	0.990467	2482	2	-0.2926	0.022692	0.074709	0.954554	1130	2	-0.2926
FBgn0003310	6	0.9038	0.90356	0.993146	14144	0	0.82039	0.022692	0.074709	0.954554	1131	4	0.82039
FBgn0266987	4	0.63415	0.65645	0.991098	11260	1	0.14849	0.022789	0.061829	0.954554	1132	1	0.14849
FBgn0002921	6	0.63389	0.74398	0.992082	11254	1	0.49161	0.022849	0.075091	0.954554	1133	4	0.49161
FBgn0052581	3	0.9771	0.9773	0.999097	15262	0	0.72994	0.022903	0.0588	0.954554	1134	3	0.72994
FBgn0053172	6	0.090614	0.21907	0.990467	3260	1	0.4545	0.022907	0.075245	0.954554	1135	4	0.4545
FBgn0264479	4	0.66091	0.67579	0.992082	11453	1	0.9784	0.02294	0.062146	0.954554	1136	3	0.9784
FBgn0038965	4	0.049197	0.11617	0.990467	2002	1	0.70085	0.02294	0.062146	0.954554	1137	2	0.70085
FBgn0015039	6	0.29511	0.48575	0.990562	7265	2	0.39177	0.023004	0.075506	0.954554	1138	3	0.39177
FBgn0031315	6	0.96403	0.96412	0.999097	15038	0	0.54594	0.023004	0.075506	0.954554	1139	3	0.54594
FBgn0032244	6	0.9038	0.90356	0.993146	14019	0	0.27623	0.023118	0.075791	0.954554	1140	3	0.27623
FBgn0266372	4	0.93464	0.93433	0.999097	14609	0	0.32485	0.023146	0.062601	0.954554	1141	2	0.32485
FBgn0034463	5	0.8989	0.89915	0.993146	13973	0	0.34599	0.023166	0.071428	0.954554	1142	4	0.34599
FBgn0263967	4	0.65411	0.67075	0.991846	11415	1	0.35606	0.023199	0.06272	0.954554	1143	2	0.35606
FBgn0002593	6	0.67981	0.76181	0.992082	11597	1	0.46692	0.023213	0.076019	0.954554	1144	4	0.46692
FBgn0083938	6	0.36132	0.5365	0.990562	8171	1	0.57329	0.023213	0.076019	0.954554	1145	4	0.57329
FBgn0036309	6	0.37665	0.54848	0.990867	8355	1	0.55741	0.023213	0.076019	0.954554	1146	4	0.55741
FBgn0267105	6	0.18149	0.34839	0.990467	5169	2	0.53244	0.023321	0.076275	0.954554	1147	4	0.53244
FBgn0034564	6	0.79584	0.81859	0.993146	12762	1	0.51662	0.023328	0.076294	0.954554	1148	4	0.51662
FBgn0020280	6	0.92295	0.92273	0.99903	14442	0	0.33463	0.023328	0.076294	0.954554	1149	3	0.33463
FBgn0267575	4	0.24611	0.37267	0.990467	6474	1	0.36542	0.023373	0.063117	0.954554	1150	2	0.36542
FBgn0034315	6	0.97358	0.97366	0.999097	15195	0	0.28121	0.023373	0.076405	0.954554	1151	3	0.28121
FBgn0040699	6	0.9038	0.90356	0.993146	14145	0	0.18552	0.023373	0.076405	0.954554	1152	3	0.18552
FBgn0051710	6	0.78219	0.81064	0.993146	12515	1	0.45046	0.023373	0.076405	0.954554	1153	3	0.45046
FBgn0054045	6	0.18813	0.35744	0.990467	5311	2	0.082536	0.023373	0.076405	0.954554	1154	2	0.082536
FBgn0034328	6	0.32258	0.50655	0.990562	7640	2	0.081483	0.023373	0.076405	0.954554	1155	3	0.081483
FBgn0035880	6	0.94723	0.94704	0.999097	14793	0	0.09311	0.023373	0.076405	0.954554	1156	3	0.09311
FBgn0039326	6	0.9038	0.90356	0.993146	14218	0	0.2045	0.023373	0.076405	0.954554	1157	3	0.2045
FBgn0030277	6	0.57782	0.7138	0.992082	10744	2	-0.16414	0.023373	0.076405	0.954554	1158	2	-0.16414
FBgn0023001	6	0.31601	0.50148	0.990562	7551	1	0.11074	0.023373	0.076405	0.954554	1159	1	0.11074
FBgn0031644	6	0.16029	0.31902	0.990467	4745	2	0.040633	0.023373	0.076405	0.954554	1160	2	0.040633
FBgn0034296	6	0.78419	0.81175	0.993146	12522	1	0.28883	0.023373	0.076405	0.954554	1161	2	0.28883
FBgn0052572	6	0.011643	0.044354	0.987	635	3	-0.36623	0.023373	0.076405	0.954554	1162	2	-0.36623
FBgn0259961	6	0.61724	0.73789	0.992082	11121	1	0.68912	0.023449	0.07657	0.954554	1163	4	0.68912
FBgn0039131	6	0.9038	0.90356	0.993146	14230	0	0.6288	0.023449	0.07657	0.954554	1164	4	0.6288
FBgn0035145	6	0.87408	0.87501	0.993146	13702	1	0.63186	0.023459	0.076593	0.954554	1165	4	0.63186
FBgn0264502	5	0.11713	0.24417	0.990467	3837	1	0.97613	0.023498	0.072309	0.954554	1166	3	0.97613
FBgn0031031	6	0.88393	0.88396	0.993146	13836	1	0.52027	0.023518	0.076751	0.954554	1167	4	0.52027
FBgn0025885	6	0.52034	0.66459	0.991655	10048	2	0.36532	0.023534	0.076796	0.954554	1168	4	0.36532
FBgn0263400	6	0.60996	0.73532	0.992082	11073	1	0.44592	0.02355	0.076825	0.954554	1169	4	0.44592
FBgn0259481	10	0.3004	0.55048	0.990867	7325	4	-0.18948	0.023574	0.093098	0.954554	1170	3	-0.18948
FBgn0031389	6	0.051624	0.1424	0.990467	2090	1	0.36354	0.023584	0.076903	0.954554	1171	3	0.36354
FBgn0264324	3	0.9151	0.91526	0.99903	14302	0	0.65156	0.023605	0.060422	0.954554	1172	2	0.65156
FBgn0030761	4	0.81063	0.81013	0.993146	12880	0	0.53802	0.02363	0.063675	0.954554	1173	2	0.53802
FBgn0034480	6	0.73729	0.78724	0.992082	12112	1	0.36258	0.023651	0.077062	0.954554	1174	4	0.36258
FBgn0035248	6	0.50139	0.64881	0.991024	9820	2	0.26428	0.023668	0.077103	0.954554	1175	3	0.26428
FBgn0030931	6	0.72207	0.78003	0.992082	11982	1	0.49106	0.023672	0.077116	0.954554	1176	4	0.49106
FBgn0263387	2	0.82471	0.8241	0.993146	13035	0	0.67594	0.023688	0.043694	0.954554	1177	1	0.67594
FBgn0036156	6	0.35526	0.53177	0.990562	8086	1	0.5067	0.023701	0.077208	0.954554	1178	4	0.5067
FBgn0267645	4	0.79005	0.78951	0.992082	12583	0	0.2025	0.023723	0.063868	0.954554	1179	1	0.2025
FBgn0052544	6	0.57886	0.7147	0.992082	10757	1	0.42249	0.023734	0.07728	0.954554	1180	4	0.42249
FBgn0038242	6	0.2729	0.46903	0.990562	6967	2	0.33797	0.023752	0.07733	0.954554	1181	4	0.33797
FBgn0264719	4	0.3176	0.45315	0.990467	7576	2	0.30179	0.02377	0.063958	0.954554	1182	2	0.30179
FBgn0032647	6	0.067282	0.17754	0.990467	2601	2	0.27589	0.023822	0.077487	0.954554	1183	3	0.27589
FBgn0053771	6	0.222	0.4031	0.990467	6002	2	0.27424	0.023855	0.077567	0.954554	1184	3	0.27424
FBgn0000996	6	0.80254	0.82268	0.993146	12808	1	0.043674	0.02387	0.077607	0.954554	1185	3	0.043674
FBgn0039357	6	0.92161	0.92134	0.99903	14420	0	0.32181	0.023885	0.077634	0.954554	1186	3	0.32181
FBgn0250846	6	0.57074	0.70766	0.992082	10650	2	0.2651	0.023895	0.07766	0.954554	1187	3	0.2651
FBgn0030357	6	0.11169	0.25001	0.990467	3725	3	-0.71401	0.023908	0.077693	0.954554	1188	2	-0.71401
FBgn0026620	11	0.11192	0.30266	0.990467	3729	4	0.28981	0.023922	0.098102	0.956006	1189	6	0.28981
FBgn0043455	7	0.93488	0.93485	0.999097	14616	0	0.48706	0.023923	0.08347	0.954554	1190	5	0.48706
FBgn0266098	3	0.97607	0.97626	0.999097	15242	0	0.27326	0.02393	0.061215	0.954554	1191	3	0.27326
FBgn0032276	6	0.95465	0.95461	0.999097	14915	0	0.68135	0.02402	0.077965	0.954554	1192	4	0.68135
FBgn0034035	6	0.93157	0.9314	0.999097	14563	0	0.44534	0.02402	0.077965	0.954554	1193	4	0.44534
FBgn0046247	6	0.44389	0.60187	0.991024	9133	2	0.46799	0.02402	0.077965	0.954554	1194	4	0.46799
FBgn0003964	2	0.97591	0.97581	0.999097	15236	0	0.58264	0.024092	0.044413	0.954554	1195	2	0.58264
FBgn0263022	6	0.11041	0.24811	0.990467	3701	3	-0.77152	0.024177	0.078376	0.954554	1196	1	-0.77152
FBgn0037936	5	0.62454	0.69278	0.992082	11179	1	0.65536	0.024213	0.07429	0.954554	1197	3	0.65536
FBgn0033915	4	0.20489	0.32638	0.990467	5647	1	0.4146	0.024269	0.065015	0.954554	1198	3	0.4146
FBgn0033558	7	0.83408	0.86121	0.993146	13170	1	0.021949	0.024327	0.084715	0.954554	1199	3	0.021949
FBgn0050263	8	0.97411	0.97428	0.999097	15199	0	0.04732	0.024328	0.087729	0.954554	1200	3	0.04732
FBgn0263442	4	0.84952	0.84898	0.993146	13345	0	0.4959	0.024341	0.065173	0.954554	1201	3	0.4959
FBgn0031844	6	0.15632	0.3134	0.990467	4664	3	-0.26932	0.02436	0.078833	0.954554	1202	2	-0.26932
FBgn0037236	5	0.95084	0.95095	0.999097	14853	0	0.37336	0.024362	0.074664	0.954554	1203	3	0.37336
FBgn0053281	6	0.032841	0.098456	0.987	1471	2	-0.12349	0.024387	0.078899	0.954554	1204	2	-0.12349
FBgn0015321	5	0.56715	0.6656	0.991655	10606	1	0.2671	0.024455	0.07492	0.954554	1205	3	0.2671
FBgn0264563	6	0.22949	0.4131	0.990467	6144	1	0.49042	0.024463	0.079094	0.954554	1206	4	0.49042
FBgn0034700	6	0.4174	0.5807	0.990867	8850	1	0.63611	0.024463	0.079094	0.954554	1207	4	0.63611
FBgn0000500	6	0.9038	0.90356	0.993146	14104	0	0.1957	0.024507	0.079201	0.954554	1208	3	0.1957
FBgn0038241	6	0.1733	0.33709	0.990467	5013	2	0.51581	0.02458	0.079388	0.954554	1209	4	0.51581
FBgn0033653	6	0.99763	0.99759	0.999996	15586	0	0.28948	0.02458	0.079388	0.954554	1210	4	0.28948
FBgn0004888	6	0.6853	0.76408	0.992082	11653	1	0.12629	0.024631	0.079512	0.954554	1211	2	0.12629
FBgn0034756	6	0.99055	0.99058	0.999097	15482	0	0.52342	0.024635	0.079521	0.954554	1212	4	0.52342
FBgn0038944	6	0.87034	0.87176	0.993146	13658	1	0.34818	0.024674	0.079627	0.954554	1213	3	0.34818
FBgn0265792	4	0.31427	0.44936	0.990467	7526	1	0.15604	0.02468	0.065925	0.954554	1214	1	0.15604
FBgn0014368	6	0.97223	0.97233	0.999097	15175	0	0.52262	0.024691	0.079668	0.954554	1215	4	0.52262
FBgn0034284	6	0.56661	0.70407	0.992082	10600	2	-0.049281	0.024738	0.07977	0.954554	1216	2	-0.049281
FBgn0040066	6	0.39108	0.55989	0.990867	8529	1	0.30801	0.024754	0.079811	0.954554	1217	3	0.30801
FBgn0267351	4	0.67185	0.68402	0.992082	11541	1	0.52754	0.02477	0.06612	0.954554	1218	2	0.52754
FBgn0085465	5	0.012506	0.041274	0.987	684	1	0.80026	0.024783	0.07577	0.954554	1219	3	0.80026
FBgn0031562	6	0.31287	0.4992	0.990562	7505	2	0.24338	0.024806	0.079931	0.954554	1220	2	0.24338
FBgn0035540	6	0.32258	0.50655	0.990562	7642	2	0.4656	0.024809	0.079941	0.954554	1221	4	0.4656
FBgn0033041	6	0.63168	0.74315	0.992082	11235	1	0.38751	0.024809	0.079941	0.954554	1222	4	0.38751
FBgn0010488	6	0.98809	0.9881	0.999097	15449	0	0.37821	0.024921	0.080209	0.954554	1223	3	0.37821
FBgn0033778	6	0.28166	0.47568	0.990562	7075	1	0.50269	0.024921	0.080211	0.954554	1224	4	0.50269
FBgn0051845	4	0.35066	0.49028	0.990562	8016	1	-0.12171	0.024936	0.066462	0.954554	1225	1	-0.12171
FBgn0037412	6	0.72303	0.78047	0.992082	11993	1	0.14353	0.024982	0.08035	0.954554	1226	3	0.14353
FBgn0050334	6	0.32	0.50452	0.990562	7605	1	0.61487	0.025007	0.080413	0.954554	1227	4	0.61487
FBgn0259203	4	0.54577	0.59932	0.991024	10378	1	0.27037	0.02503	0.066663	0.954554	1228	2	0.27037
FBgn0038533	3	0.71946	0.71955	0.992082	11957	0	1.1076	0.025033	0.063824	0.954554	1229	2	1.1076
FBgn0266404	4	0.62793	0.65213	0.991098	11210	1	0.70512	0.025046	0.066688	0.954554	1230	3	0.70512
FBgn0050197	6	0.85482	0.8589	0.993146	13422	1	0.3705	0.025064	0.080556	0.954554	1231	4	0.3705
FBgn0011837	3	0.88594	0.88597	0.993146	13857	0	0.49132	0.025118	0.064031	0.954554	1232	2	0.49132
FBgn0266831	4	0.947	0.9468	0.999097	14790	0	0.07163	0.025146	0.066917	0.954554	1233	1	0.07163
FBgn0000376	6	0.9849	0.98493	0.999097	15393	0	0.54665	0.025242	0.080997	0.954554	1234	4	0.54665
FBgn0024958	6	0.40423	0.57031	0.990867	8690	1	0.50039	0.025249	0.081013	0.954554	1235	3	0.50039
FBgn0032116	6	0.2333	0.41815	0.990467	6213	3	-0.016703	0.025259	0.081045	0.954554	1236	3	-0.016703
FBgn0040299	6	0.9038	0.90356	0.993146	14156	0	0.093639	0.025259	0.081045	0.954554	1237	2	0.093639
FBgn0039195	6	0.020643	0.068281	0.987	987	2	0.072115	0.025259	0.081045	0.954554	1238	2	0.072115
FBgn0037662	6	0.29001	0.48195	0.990562	7191	1	0.46545	0.02526	0.081046	0.954554	1239	4	0.46545
FBgn0036449	4	0.79005	0.78951	0.992082	12597	0	0.43557	0.025309	0.06729	0.954554	1240	2	0.43557
FBgn0051445	6	0.040862	0.11749	0.990467	1725	2	-0.0083349	0.025333	0.081238	0.954554	1241	3	-0.0083349
FBgn0030945	5	0.32615	0.4764	0.990562	7710	2	0.55638	0.025374	0.077359	0.954554	1242	3	0.55638
FBgn0039914	6	0.014565	0.052682	0.987	756	1	0.32878	0.025379	0.08135	0.954554	1243	4	0.32878
FBgn0038771	4	0.97684	0.97677	0.999097	15254	0	0.7285	0.025403	0.067475	0.954554	1244	3	0.7285
FBgn0050259	4	0.59782	0.63182	0.991024	10974	1	0.47158	0.025405	0.067486	0.954554	1245	3	0.47158
FBgn0039509	6	0.9038	0.90356	0.993146	14138	0	0.42825	0.025448	0.081524	0.954554	1246	4	0.42825
FBgn0053700	6	0.26921	0.46524	0.990562	6915	1	0.18074	0.025496	0.081627	0.954554	1247	3	0.18074
FBgn0050025	1	0.97447	0.97456	0.999097	15209	0	2.0962	0.025529	0.025451	0.915592	1248	1	2.0962
FBgn0028562	6	0.64692	0.74877	0.992082	11364	1	0.40022	0.025587	0.081852	0.954554	1249	3	0.40022
FBgn0050390	4	0.17912	0.29724	0.990467	5127	2	-0.0052652	0.025589	0.067861	0.954554	1250	2	-0.0052652
FBgn0266072	4	0.75411	0.75412	0.992082	12285	1	0.35384	0.025589	0.067861	0.954554	1251	2	0.35384
FBgn0266355	4	0.70851	0.71327	0.992082	11861	1	0.35922	0.025589	0.067861	0.954554	1252	3	0.35922
FBgn0266865	4	0.6766	0.68759	0.992082	11578	1	0.75286	0.025687	0.068062	0.954554	1253	2	0.75286
FBgn0266651	4	0.085559	0.18752	0.990467	3128	2	0.69434	0.025687	0.068062	0.954554	1254	2	0.69434
FBgn0267098	4	0.043462	0.1047	0.988442	1814	2	0.644	0.025687	0.068062	0.954554	1255	2	0.644
FBgn0001229	6	0.18176	0.34879	0.990467	5178	1	0.13623	0.025718	0.082169	0.954554	1256	2	0.13623
FBgn0267535	4	0.20003	0.32091	0.990467	5554	2	-0.16828	0.025752	0.068195	0.954554	1257	1	-0.16828
FBgn0260431	6	0.16543	0.32607	0.990467	4851	3	0.073858	0.025777	0.082322	0.954554	1258	3	0.073858
FBgn0037060	6	0.9038	0.90356	0.993146	14060	0	0.76262	0.025789	0.082349	0.954554	1259	4	0.76262
FBgn0263198	6	0.0019951	0.0090124	0.91437	128	2	0.78672	0.025789	0.082349	0.954554	1260	4	0.78672
FBgn0261568	6	0.096692	0.22811	0.990467	3386	1	0.18584	0.025816	0.082425	0.954554	1261	3	0.18584
FBgn0085230	6	0.32576	0.50905	0.990562	7702	2	0.14822	0.025816	0.082425	0.954554	1262	3	0.14822
FBgn0027514	5	0.98072	0.98085	0.999097	15323	0	0.32656	0.025846	0.078647	0.954554	1263	2	0.32656
FBgn0039428	6	0.10179	0.23552	0.990467	3496	3	-0.11623	0.025853	0.082514	0.954554	1264	3	-0.11623
FBgn0051788	6	0.96661	0.96668	0.999097	15072	0	0.43034	0.025888	0.082605	0.954554	1265	3	0.43034
FBgn0035425	5	0.27914	0.43242	0.990467	7044	1	0.25871	0.025905	0.078796	0.954554	1266	2	0.25871
FBgn0028875	6	0.41211	0.57653	0.990867	8781	1	0.44045	0.025922	0.082676	0.954554	1267	4	0.44045
FBgn0037240	6	0.26041	0.45385	0.990467	6755	1	0.45747	0.025965	0.08279	0.954554	1268	3	0.45747
FBgn0267277	4	0.9778	0.97776	0.999097	15278	0	0.8182	0.026002	0.068724	0.954554	1269	3	0.8182
FBgn0004957	5	0.59769	0.67971	0.992082	10968	1	0.13648	0.026007	0.079083	0.954554	1270	2	0.13648
FBgn0058191	6	0.2084	0.38496	0.990467	5724	2	0.15469	0.02602	0.082922	0.954554	1271	3	0.15469
FBgn0040941	6	0.14059	0.29139	0.990467	4327	2	0.59986	0.02602	0.082922	0.954554	1272	4	0.59986
FBgn0024994	6	0.96578	0.96587	0.999097	15059	0	0.33208	0.026021	0.082924	0.954554	1273	4	0.33208
FBgn0004569	6	0.97287	0.97295	0.999097	15185	0	1.0052	0.026156	0.083233	0.954554	1274	4	1.0052
FBgn0031390	6	0.81265	0.82906	0.993146	12898	1	0.64695	0.026156	0.083233	0.954554	1275	4	0.64695
FBgn0039106	6	0.69887	0.76975	0.992082	11780	1	0.13041	0.026201	0.08335	0.954554	1276	2	0.13041
FBgn0266900	4	0.79005	0.78951	0.992082	12609	0	-0.048327	0.026242	0.069231	0.954554	1277	1	-0.048327
FBgn0037686	5	0.40644	0.55275	0.990867	8719	2	0.50822	0.026253	0.079799	0.954554	1278	3	0.50822
FBgn0266785	4	0.98366	0.98365	0.999097	15366	0	0.5231	0.026278	0.069296	0.954554	1279	3	0.5231
FBgn0038509	6	0.67132	0.75836	0.992082	11535	1	0.41947	0.026287	0.083561	0.954554	1280	3	0.41947
FBgn0250753	4	0.17516	0.29274	0.990467	5052	1	0.53638	0.026357	0.069462	0.954554	1281	2	0.53638
FBgn0051269	4	0.18397	0.30275	0.990467	5223	1	0.028205	0.026358	0.069469	0.954554	1282	2	0.028205
FBgn0015351	6	0.26642	0.46161	0.990467	6873	3	-0.62451	0.026376	0.083776	0.954554	1283	2	-0.62451
FBgn0050005	6	0.18905	0.35872	0.990467	5323	2	0.42566	0.026421	0.083892	0.954554	1284	3	0.42566
FBgn0265854	4	0.2803	0.41118	0.990467	7057	2	-0.1249	0.026428	0.069618	0.954554	1285	1	-0.1249
FBgn0260226	6	0.86831	0.87007	0.993146	13620	1	0.44241	0.026435	0.083923	0.954554	1286	4	0.44241
FBgn0037184	4	0.69772	0.70434	0.992082	11771	1	0.48414	0.026448	0.069659	0.954554	1287	3	0.48414
FBgn0040679	6	0.055862	0.15207	0.990467	2215	4	-0.36989	0.02648	0.084025	0.954554	1288	1	-0.36989
FBgn0262992	4	0.097635	0.20456	0.990467	3408	2	-0.34581	0.026521	0.069811	0.954554	1289	1	-0.34581
FBgn0030985	6	0.93825	0.93817	0.999097	14665	0	0.29895	0.026561	0.084218	0.954554	1290	3	0.29895
FBgn0035512	5	0.88757	0.88791	0.993146	13893	0	0.51075	0.026579	0.080688	0.954554	1291	3	0.51075
FBgn0021995	8	0.88235	0.90299	0.993146	13812	1	0.47355	0.026586	0.093984	0.954554	1292	4	0.47355
FBgn0030724	6	0.083745	0.20879	0.990467	3086	3	-0.046877	0.02662	0.084359	0.954554	1293	2	-0.046877
FBgn0051126	5	0.9119	0.91215	0.99903	14276	0	0.35498	0.026632	0.080849	0.954554	1294	3	0.35498
FBgn0036882	5	0.032578	0.096648	0.987	1458	1	-0.0088338	0.026632	0.080849	0.954554	1295	2	-0.0088338
FBgn0052642	6	0.12892	0.27494	0.990467	4065	2	0.54985	0.026651	0.084432	0.954554	1296	3	0.54985
FBgn0051646	6	0.21586	0.39489	0.990467	5882	2	0.077625	0.026714	0.084596	0.954554	1297	3	0.077625
FBgn0013720	6	0.096188	0.22734	0.990467	3374	3	-0.39655	0.026759	0.0847	0.954554	1298	2	-0.39655
FBgn0032770	6	0.21076	0.38808	0.990467	5776	1	0.44333	0.026814	0.084827	0.954554	1299	3	0.44333
FBgn0037420	6	0.35347	0.53035	0.990562	8050	2	0.17799	0.026814	0.084827	0.954554	1300	3	0.17799
FBgn0086372	6	0.13229	0.27966	0.990467	4130	2	0.19258	0.026814	0.084827	0.954554	1301	3	0.19258
FBgn0260442	10	0.20042	0.43325	0.990467	5561	4	0.19115	0.026831	0.10278	0.963101	1302	4	0.19115
FBgn0063493	6	0.9038	0.90356	0.993146	14135	0	0.37392	0.026881	0.085011	0.954554	1303	3	0.37392
FBgn0038414	6	0.024232	0.077303	0.987	1124	2	0.6375	0.026882	0.085012	0.954554	1304	4	0.6375
FBgn0038903	6	0.97863	0.97869	0.999097	15289	0	0.58312	0.026894	0.08504	0.954554	1305	4	0.58312
FBgn0034506	6	0.18145	0.34834	0.990467	5168	2	0.4855	0.026932	0.085127	0.954554	1306	4	0.4855
FBgn0040651	6	0.30075	0.48992	0.990562	7332	1	0.064776	0.026947	0.085161	0.954554	1307	2	0.064776
FBgn0034435	6	0.92985	0.92969	0.999097	14539	0	0.44222	0.027027	0.085331	0.954554	1308	4	0.44222
FBgn0266982	4	0.26218	0.3908	0.990467	6793	1	0.19923	0.027034	0.070921	0.954554	1309	2	0.19923
FBgn0036254	6	0.72181	0.77991	0.992082	11977	1	0.22089	0.027038	0.085359	0.954554	1310	3	0.22089
FBgn0036713	6	0.26945	0.46554	0.990562	6921	3	0.025195	0.027038	0.085359	0.954554	1311	2	0.025195
FBgn0031580	6	0.15164	0.30685	0.990467	4553	2	0.41617	0.027038	0.085359	0.954554	1312	3	0.41617
FBgn0029849	6	0.27061	0.46709	0.990562	6938	2	0.30507	0.027054	0.085389	0.954554	1313	3	0.30507
FBgn0262008	6	0.9038	0.90356	0.993146	14177	0	0.60593	0.027123	0.085559	0.954554	1314	4	0.60593
FBgn0019985	6	0.58058	0.71621	0.992082	10782	2	0.21591	0.027182	0.08571	0.954554	1315	3	0.21591
FBgn0025683	6	0.31505	0.50077	0.990562	7542	2	0.24657	0.027202	0.085761	0.954554	1316	3	0.24657
FBgn0028520	6	0.01541	0.054832	0.987	790	1	0.4751	0.027246	0.085876	0.954554	1317	4	0.4751
FBgn0033428	6	0.66905	0.75748	0.992082	11515	1	0.58763	0.027246	0.085876	0.954554	1318	4	0.58763
FBgn0004778	6	0.0018229	0.0082971	0.91437	116	3	-0.049762	0.027247	0.085877	0.954554	1319	1	-0.049762
FBgn0053128	6	0.50826	0.65457	0.991098	9906	1	0.45535	0.027296	0.086016	0.954554	1320	3	0.45535
FBgn0259231	6	0.83124	0.84152	0.993146	13129	1	0.3595	0.027317	0.086064	0.954554	1321	3	0.3595
FBgn0267758	4	0.55373	0.60413	0.991024	10473	1	0.51301	0.027395	0.071724	0.954554	1322	2	0.51301
FBgn0034473	6	0.94873	0.94858	0.999097	14816	0	0.39822	0.027421	0.086344	0.954554	1323	3	0.39822
FBgn0011274	6	0.85503	0.85906	0.993146	13423	1	0.094038	0.027421	0.086344	0.954554	1324	1	0.094038
FBgn0039309	2	0.97256	0.97244	0.999097	15180	0	0.54164	0.027444	0.050273	0.954554	1325	2	0.54164
FBgn0031878	4	0.73361	0.7351	0.992082	12079	1	-0.062579	0.027499	0.071936	0.954554	1326	1	-0.062579
FBgn0025549	6	0.95372	0.95367	0.999097	14893	0	0.22676	0.027526	0.086617	0.954554	1327	3	0.22676
FBgn0037570	6	0.55173	0.69129	0.992082	10446	1	0.41326	0.027551	0.086678	0.954554	1328	4	0.41326
FBgn0035544	6	0.27206	0.4684	0.990562	6960	2	0.4387	0.02756	0.086702	0.954554	1329	4	0.4387
FBgn0016660	6	0.54225	0.68319	0.992082	10332	1	0.46987	0.02756	0.086702	0.954554	1330	4	0.46987
FBgn0263133	6	0.31777	0.50283	0.990562	7580	1	0.48857	0.027588	0.086764	0.954554	1331	3	0.48857
FBgn0085191	5	0.9745	0.97462	0.999097	15210	0	0.48533	0.027651	0.083612	0.954554	1332	3	0.48533
FBgn0040153	6	0.83357	0.84318	0.993146	13165	1	0.53648	0.027665	0.086947	0.954554	1333	4	0.53648
FBgn0014849	4	0.62858	0.65258	0.991098	11213	1	0.81529	0.027723	0.072446	0.954554	1334	2	0.81529
FBgn0039151	6	0.85197	0.85667	0.993146	13372	1	0.13863	0.027735	0.087122	0.954554	1335	3	0.13863
FBgn0029769	6	0.80254	0.82268	0.993146	12807	1	0.57338	0.027773	0.087215	0.954554	1336	3	0.57338
FBgn0000241	6	0.69007	0.76608	0.992082	11702	1	-0.12184	0.027781	0.087231	0.954554	1337	2	-0.12184
FBgn0014018	9	0.97016	0.97015	0.999097	15138	0	0.31124	0.0279	0.10474	0.963101	1338	5	0.31124
FBgn0039251	6	0.16331	0.32313	0.990467	4806	1	0.61587	0.027936	0.087605	0.954554	1339	4	0.61587
FBgn0039290	8	0.33116	0.54871	0.990867	7765	2	-0.011833	0.027939	0.097673	0.954554	1340	1	-0.011833
FBgn0004567	6	0.52943	0.67223	0.99193	10160	2	0.066202	0.027944	0.087624	0.954554	1341	2	0.066202
FBgn0267537	4	0.16106	0.27676	0.990467	4757	1	0.43859	0.027954	0.072936	0.954554	1342	3	0.43859
FBgn0029730	6	0.50317	0.65028	0.991098	9845	1	0.33526	0.028004	0.087786	0.954554	1343	3	0.33526
FBgn0050472	6	0.54242	0.68334	0.992082	10335	2	0.42676	0.028024	0.087829	0.954554	1344	3	0.42676
FBgn0014877	6	0.96905	0.96915	0.999097	15118	0	0.3451	0.028042	0.087868	0.954554	1345	4	0.3451
FBgn0267615	4	0.27541	0.40577	0.990467	6996	1	-0.1407	0.028058	0.07315	0.954554	1346	1	-0.1407
FBgn0037501	6	0.43498	0.59491	0.991024	9037	1	-0.23114	0.028083	0.087969	0.954554	1347	2	-0.23114
FBgn0026563	6	0.9038	0.90356	0.993146	14029	0	0.4913	0.028093	0.088	0.954554	1348	4	0.4913
FBgn0039670	6	0.067545	0.17816	0.990467	2606	1	0.36723	0.02817	0.088175	0.954554	1349	3	0.36723
FBgn0052815	4	0.25957	0.38787	0.990467	6736	2	0.20512	0.02819	0.073422	0.954554	1350	2	0.20512
FBgn0004397	6	0.48394	0.63447	0.991024	9598	2	-0.26664	0.028257	0.088389	0.954554	1351	2	-0.26664
FBgn0035571	6	0.31158	0.49816	0.990562	7487	2	0.2908	0.028295	0.088479	0.954554	1352	3	0.2908
FBgn0033090	6	0.26066	0.45416	0.990467	6759	2	0.22196	0.028306	0.088513	0.954554	1353	3	0.22196
FBgn0034289	6	0.7341	0.78571	0.992082	12083	1	0.47234	0.028349	0.088626	0.954554	1354	4	0.47234
FBgn0003124	6	0.9038	0.90356	0.993146	14129	0	0.47087	0.028387	0.088718	0.954554	1355	4	0.47087
FBgn0024294	6	0.57453	0.71092	0.992082	10692	2	-0.091924	0.028431	0.088823	0.954554	1356	2	-0.091924
FBgn0050033	6	0.86305	0.86565	0.993146	13551	1	0.59088	0.028501	0.088991	0.954554	1357	4	0.59088
FBgn0265833	6	0.95577	0.95573	0.999097	14926	0	0.085809	0.028501	0.088992	0.954554	1358	3	0.085809
FBgn0034022	6	0.32351	0.50729	0.990562	7676	1	-0.018804	0.028571	0.089168	0.954554	1359	1	-0.018804
FBgn0261925	6	0.13734	0.28685	0.990467	4245	3	-0.35255	0.028625	0.089301	0.954554	1360	2	-0.35255
FBgn0029870	6	0.94163	0.94152	0.999097	14719	0	0.56062	0.028625	0.089301	0.954554	1361	3	0.56062
FBgn0031791	6	0.55329	0.69263	0.992082	10467	1	0.32732	0.02864	0.089341	0.954554	1362	3	0.32732
FBgn0031449	10	0.001941	0.011505	0.91437	123	7	-0.8339	0.028682	0.10837	0.963101	1363	2	-0.8339
FBgn0266577	4	0.92374	0.92344	0.99903	14453	0	0.57357	0.028684	0.074475	0.954554	1364	3	0.57357
FBgn0023130	6	0.5537	0.69299	0.992082	10472	2	0.12077	0.02871	0.089522	0.954554	1365	2	0.12077
FBgn0040637	6	0.020056	0.066829	0.987	968	4	-0.25201	0.028779	0.089711	0.954554	1366	2	-0.25201
FBgn0038680	6	0.88393	0.88396	0.993146	13833	1	0.50449	0.028863	0.089915	0.954554	1367	3	0.50449
FBgn0259139	4	0.38247	0.5129	0.990562	8428	1	0.43488	0.028875	0.07489	0.954554	1368	2	0.43488
FBgn0035508	6	0.42214	0.58451	0.991024	8896	1	0.38454	0.028926	0.09006	0.954554	1369	4	0.38454
FBgn0051548	5	0.83235	0.83294	0.993146	13144	1	0.22843	0.028972	0.087195	0.954554	1370	2	0.22843
FBgn0039273	6	0.32444	0.508	0.990562	7688	1	0.10435	0.029045	0.090374	0.954554	1371	3	0.10435
FBgn0031813	7	0.93488	0.93485	0.999097	14614	0	0.21311	0.029072	0.098598	0.956598	1372	5	0.21311
FBgn0031824	5	0.84007	0.84044	0.993146	13244	1	0.3508	0.029076	0.087476	0.954554	1373	4	0.3508
FBgn0264982	2	0.9709	0.9708	0.999097	15152	0	0.46522	0.029105	0.053169	0.954554	1374	2	0.46522
FBgn0266623	4	0.85717	0.85678	0.993146	13449	0	0.61287	0.029113	0.075407	0.954554	1375	3	0.61287
FBgn0033890	4	0.85421	0.85375	0.993146	13415	0	0.87593	0.029113	0.075407	0.954554	1376	3	0.87593
FBgn0036605	6	0.92316	0.92294	0.99903	14448	0	0.06193	0.029162	0.090641	0.954554	1377	2	0.06193
FBgn0034301	6	0.5629	0.70087	0.992082	10560	2	-0.046688	0.029162	0.090641	0.954554	1378	1	-0.046688
FBgn0031023	2	0.5418	0.54181	0.990562	10305	0	0.40198	0.0292	0.053339	0.954554	1379	1	0.40198
FBgn0052945	6	0.52435	0.6679	0.991655	10094	2	0.0099972	0.029203	0.090745	0.954554	1380	2	0.0099972
FBgn0266667	6	0.87203	0.87322	0.993146	13681	1	0.63912	0.029203	0.090745	0.954554	1381	4	0.63912
FBgn0032596	4	0.94168	0.94143	0.999097	14720	0	0.46018	0.029261	0.075722	0.954554	1382	3	0.46018
FBgn0266640	4	0.77012	0.7695	0.992082	12439	1	0.81534	0.029261	0.075722	0.954554	1383	3	0.81534
FBgn0266635	4	0.76038	0.76004	0.992082	12348	1	0.078509	0.029291	0.075775	0.954554	1384	1	0.078509
FBgn0265841	4	0.02517	0.066177	0.987	1161	1	0.28023	0.029291	0.075775	0.954554	1385	2	0.28023
FBgn0034976	4	0.60146	0.6342	0.991024	11004	1	0.27403	0.029291	0.075775	0.954554	1386	2	0.27403
FBgn0264447	4	0.10446	0.21228	0.990467	3556	1	-0.036481	0.029291	0.075775	0.954554	1387	1	-0.036481
FBgn0262355	4	0.69755	0.7042	0.992082	11768	1	0.1139	0.029291	0.075775	0.954554	1388	2	0.1139
FBgn0267935	4	0.5952	0.63012	0.991024	10949	1	0.47555	0.029291	0.075775	0.954554	1389	2	0.47555
FBgn0030435	4	0.081865	0.18062	0.990467	3032	2	-0.22496	0.029291	0.075775	0.954554	1390	1	-0.22496
FBgn0033792	8	0.0088038	0.037938	0.987	499	5	-0.38326	0.02933	0.10142	0.963101	1391	2	-0.38326
FBgn0052095	6	0.82822	0.83936	0.993146	13087	1	0.11776	0.029349	0.091094	0.954554	1392	2	0.11776
FBgn0050000	6	0.30434	0.49267	0.990562	7380	2	0.070485	0.029529	0.091547	0.954554	1393	2	0.070485
FBgn0053995	2	0.97045	0.97037	0.999097	15145	0	0.33657	0.029546	0.053977	0.954554	1394	2	0.33657
FBgn0266086	4	0.91341	0.91314	0.99903	14292	0	0.44171	0.029571	0.076351	0.954554	1395	3	0.44171
FBgn0267185	4	0.92445	0.9241	0.99903	14465	0	0.35987	0.029589	0.076385	0.954554	1396	3	0.35987
FBgn0028978	6	0.38578	0.55561	0.990867	8464	1	0.37489	0.029607	0.091738	0.954554	1397	3	0.37489
FBgn0261616	6	0.92014	0.91981	0.99903	14389	0	0.4112	0.029645	0.091837	0.954554	1398	3	0.4112
FBgn0053640	6	0.18479	0.35294	0.990467	5243	3	-0.11641	0.029649	0.091849	0.954554	1399	3	-0.11641
FBgn0036766	6	0.71308	0.77596	0.992082	11896	1	0.039052	0.029649	0.091849	0.954554	1400	2	0.039052
FBgn0267754	4	0.44491	0.54366	0.99062	9147	1	0.43561	0.029652	0.076531	0.954554	1401	3	0.43561
FBgn0032235	6	0.38708	0.55665	0.990867	8477	1	0.22004	0.029661	0.091875	0.954554	1402	3	0.22004
FBgn0266111	6	0.85672	0.86044	0.993146	13445	1	0.3607	0.029725	0.092021	0.954554	1403	4	0.3607
FBgn0033733	2	0.82961	0.82902	0.993146	13107	0	0.86533	0.02975	0.054312	0.954554	1404	1	0.86533
FBgn0030456	6	0.0042355	0.017734	0.963473	266	2	-0.077117	0.029752	0.092097	0.954554	1405	2	-0.077117
intergenic	100	0.62658	0.95779	0.999097	11197	21	0.083418	0.029782	0.20882	0.992541	1406	37	0.083418
FBgn0261587	5	0.69498	0.73124	0.992082	11747	1	0.24807	0.029795	0.089342	0.954554	1407	3	0.24807
FBgn0033725	6	0.74749	0.79224	0.992895	12211	1	0.45288	0.029824	0.092276	0.954554	1408	4	0.45288
FBgn0030545	6	0.88586	0.88579	0.993146	13856	1	0.47774	0.029824	0.092276	0.954554	1409	4	0.47774
FBgn0029766	6	0.94757	0.94738	0.999097	14797	0	0.31235	0.029891	0.09243	0.954554	1410	4	0.31235
FBgn0039434	6	0.052783	0.14504	0.990467	2127	3	-0.079055	0.029892	0.092434	0.954554	1411	3	-0.079055
FBgn0035410	4	0.82938	0.82881	0.993146	13101	0	0.88491	0.029897	0.077076	0.954554	1412	3	0.88491
FBgn0039213	4	0.4922	0.5688	0.990867	9711	1	0.32468	0.029897	0.077076	0.954554	1413	2	0.32468
FBgn0265836	6	0.61961	0.73874	0.992082	11139	1	0.15524	0.029962	0.092612	0.954554	1414	3	0.15524
FBgn0033656	6	0.78686	0.81329	0.993146	12536	1	0.20914	0.029974	0.092634	0.954554	1415	3	0.20914
FBgn0037648	6	0.30686	0.49463	0.990562	7425	1	0.44757	0.029974	0.092634	0.954554	1416	4	0.44757
FBgn0033968	6	0.95391	0.95385	0.999097	14900	0	0.06682	0.030045	0.0928	0.954554	1417	2	0.06682
FBgn0000259	6	0.18564	0.35405	0.990467	5258	3	0.056202	0.030045	0.0928	0.954554	1418	3	0.056202
FBgn0053796	5	0.6893	0.72792	0.992082	11684	1	0.56974	0.030066	0.090076	0.954554	1419	3	0.56974
FBgn0265203	4	0.89207	0.89159	0.993146	13935	0	0.40218	0.030126	0.077563	0.954554	1420	3	0.40218
FBgn0265785	6	0.98399	0.98403	0.999097	15373	0	0.49964	0.030171	0.09309	0.954554	1421	4	0.49964
FBgn0034442	6	0.8556	0.85953	0.993146	13429	1	0.72841	0.030171	0.09309	0.954554	1422	4	0.72841
FBgn0039748	6	0.78719	0.81347	0.993146	12540	1	0.22727	0.030213	0.093184	0.954554	1423	3	0.22727
FBgn0058470	6	0.9038	0.90356	0.993146	14234	0	0.21542	0.030217	0.0932	0.954554	1424	3	0.21542
FBgn0031275	7	0.33635	0.54528	0.990867	7834	2	0.4369	0.030282	0.10206	0.963101	1425	4	0.4369
FBgn0026573	5	0.94972	0.94987	0.999097	14837	0	0.64908	0.0303	0.090676	0.954554	1426	4	0.64908
FBgn0085224	6	0.00076455	0.0039976	0.91437	53	3	0.077135	0.030351	0.093531	0.954554	1427	3	0.077135
FBgn0031703	6	0.03022	0.092147	0.987	1358	3	0.078428	0.030351	0.093531	0.954554	1428	3	0.078428
FBgn0030278	6	0.85401	0.85824	0.993146	13409	1	0.30948	0.030351	0.093531	0.954554	1429	3	0.30948
FBgn0267656	4	0.12477	0.23534	0.990467	3986	2	-0.18069	0.03036	0.078056	0.954554	1430	1	-0.18069
FBgn0266264	4	0.2097	0.33181	0.990467	5756	2	-0.22215	0.03036	0.078056	0.954554	1431	1	-0.22215
FBgn0265874	4	0.38785	0.51546	0.990562	8496	1	0.56095	0.03036	0.078056	0.954554	1432	3	0.56095
FBgn0030082	4	0.79005	0.78951	0.992082	12658	0	0.47138	0.030362	0.078059	0.954554	1433	2	0.47138
FBgn0031979	6	0.15599	0.31295	0.990467	4659	2	-0.22549	0.030466	0.093821	0.954554	1434	2	-0.22549
FBgn0029878	6	0.041274	0.11849	0.990467	1743	2	0.21337	0.030493	0.093898	0.954554	1435	3	0.21337
FBgn0250814	6	0.99361	0.99361	0.999452	15536	0	0.75295	0.030502	0.093915	0.954554	1436	4	0.75295
FBgn0066101	10	0.99523	0.99526	0.999996	15553	0	0.15865	0.030564	0.1139	0.97137	1437	4	0.15865
FBgn0267233	4	0.98971	0.98971	0.999097	15470	0	0.49583	0.03061	0.078549	0.954554	1438	3	0.49583
FBgn0040569	4	0.1149	0.22424	0.990467	3793	1	0.57363	0.03061	0.078549	0.954554	1439	3	0.57363
FBgn0039157	4	0.71569	0.71935	0.992082	11922	1	0.65627	0.030654	0.078651	0.954554	1440	3	0.65627
FBgn0043577	4	0.36303	0.50376	0.990562	8193	1	0.43276	0.030655	0.078654	0.954554	1441	3	0.43276
FBgn0262167	6	0.14927	0.30351	0.990467	4493	3	-0.13734	0.030657	0.094293	0.954554	1442	2	-0.13734
FBgn0033569	6	0.56788	0.70516	0.992082	10619	1	0.41471	0.030694	0.094369	0.954554	1443	4	0.41471
FBgn0002856	6	0.92235	0.9221	0.99903	14429	0	0.34316	0.030729	0.094453	0.954554	1444	4	0.34316
FBgn0031443	6	0.19393	0.36535	0.990467	5417	3	-0.40738	0.030796	0.094597	0.954554	1445	1	-0.40738
FBgn0275434	4	0.79005	0.78951	0.992082	12628	0	0.47134	0.030816	0.078981	0.954554	1446	3	0.47134
FBgn0026378	6	0.7898	0.81494	0.993146	12557	1	0.37922	0.03082	0.094638	0.954554	1447	4	0.37922
FBgn0264987	4	0.94942	0.94926	0.999097	14831	0	0.31047	0.030847	0.079051	0.954554	1448	2	0.31047
FBgn0265713	4	0.70477	0.71011	0.992082	11834	1	0.59217	0.030861	0.079094	0.954554	1449	3	0.59217
FBgn0028946	6	0.55479	0.69391	0.992082	10478	2	0.34478	0.030865	0.094749	0.954554	1450	3	0.34478
FBgn0052106	6	0.97128	0.97141	0.999097	15158	0	0.47185	0.030929	0.094877	0.954554	1451	4	0.47185
FBgn0031388	6	0.49062	0.63998	0.991024	9689	2	0.46576	0.030929	0.094877	0.954554	1452	4	0.46576
FBgn0053284	5	0.92317	0.92341	0.99903	14449	0	0.60137	0.031046	0.092704	0.954554	1453	4	0.60137
FBgn0020496	8	0.97559	0.97571	0.999097	15230	0	0.32868	0.031051	0.10619	0.963101	1454	4	0.32868
FBgn0031479	6	0.306	0.49395	0.990562	7409	1	0.42139	0.031067	0.095195	0.954554	1455	4	0.42139
FBgn0052251	6	0.45131	0.60792	0.991024	9233	2	-0.089342	0.031074	0.095211	0.954554	1456	3	-0.089342
FBgn0265455	6	0.99302	0.99304	0.999185	15529	0	0.46731	0.031097	0.095265	0.954554	1457	4	0.46731
FBgn0262574	6	0.15701	0.31436	0.990467	4675	2	0.2397	0.031164	0.09541	0.954554	1458	3	0.2397
FBgn0260720	4	0.55992	0.60781	0.991024	10529	1	0.072967	0.031172	0.079772	0.954554	1459	1	0.072967
FBgn0031228	6	0.0010336	0.0051824	0.91437	73	1	0.35228	0.031178	0.09544	0.954554	1460	4	0.35228
FBgn0030054	6	0.1952	0.36711	0.990467	5452	2	0.14405	0.031178	0.095441	0.954554	1461	3	0.14405
FBgn0261602	6	0.35942	0.53501	0.990562	8141	1	0.47055	0.031263	0.095633	0.954554	1462	4	0.47055
FBgn0046113	6	0.53527	0.67713	0.992082	10224	1	0.49064	0.031263	0.095633	0.954554	1463	4	0.49064
FBgn0038774	6	0.14717	0.30057	0.990467	4448	2	-0.042952	0.031327	0.095786	0.954554	1464	3	-0.042952
FBgn0031220	7	0.86732	0.87991	0.993146	13605	1	0.056961	0.031328	0.10507	0.963101	1465	3	0.056961
FBgn0004374	6	0.51472	0.65991	0.99121	9985	1	0.44592	0.031387	0.095943	0.954554	1466	3	0.44592
FBgn0031144	6	0.79026	0.81519	0.993146	12718	1	0.01331	0.03143	0.09603	0.954554	1467	2	0.01331
FBgn0025626	5	0.5169	0.64411	0.991024	10007	1	0.24807	0.031469	0.093798	0.954554	1468	4	0.24807
FBgn0030798	7	0.68307	0.80158	0.993146	11623	1	0.58949	0.031479	0.10549	0.963101	1469	4	0.58949
FBgn0261933	4	0.95724	0.95706	0.999097	14948	0	0.61463	0.031523	0.080518	0.954554	1470	2	0.61463
FBgn0039613	6	0.98565	0.98567	0.999097	15405	0	0.48542	0.031557	0.09633	0.954554	1471	3	0.48542
FBgn0260439	6	0.71714	0.7778	0.992082	11940	1	0.52416	0.031594	0.096434	0.954554	1472	4	0.52416
FBgn0036512	6	0.28294	0.47664	0.990562	7098	2	0.55305	0.031594	0.096434	0.954554	1473	4	0.55305
FBgn0000640	6	0.72181	0.77991	0.992082	11978	1	0.24952	0.03173	0.09676	0.954554	1474	3	0.24952
FBgn0026760	6	0.9038	0.90356	0.993146	14054	0	-0.13092	0.03173	0.09676	0.954554	1475	2	-0.13092
FBgn0053017	6	0.018378	0.062522	0.987	897	4	-0.5766	0.03173	0.09676	0.954554	1476	2	-0.5766
FBgn0265061	4	0.71853	0.72175	0.992082	11951	1	0.33786	0.031777	0.081002	0.954554	1477	3	0.33786
FBgn0261803	6	0.38547	0.55537	0.990867	8461	2	0.58169	0.0318	0.096926	0.954554	1478	3	0.58169
FBgn0243514	6	0.9339	0.93375	0.999097	14599	0	0.50843	0.0318	0.096926	0.954554	1479	3	0.50843
FBgn0025624	6	0.63452	0.74421	0.992082	11264	1	0.20131	0.0318	0.096926	0.954554	1480	3	0.20131
FBgn0039207	6	0.04106	0.11795	0.990467	1733	3	0.33707	0.0318	0.096926	0.954554	1481	3	0.33707
FBgn0050187	6	0.55958	0.698	0.992082	10526	1	0.52023	0.0318	0.096926	0.954554	1482	4	0.52023
FBgn0001137	6	0.54236	0.6833	0.992082	10333	1	0.45043	0.031872	0.097103	0.954554	1483	3	0.45043
FBgn0259742	6	0.54583	0.6863	0.992082	10380	1	0.27009	0.031872	0.097103	0.954554	1484	3	0.27009
FBgn0041181	6	0.13495	0.28348	0.990467	4192	3	-0.18852	0.031872	0.097103	0.954554	1485	1	-0.18852
FBgn0036941	6	0.39742	0.56489	0.990867	8615	2	0.35995	0.031872	0.097103	0.954554	1486	3	0.35995
FBgn0033864	6	0.25066	0.44121	0.990467	6560	2	-0.031002	0.031872	0.097103	0.954554	1487	2	-0.031002
FBgn0262528	4	0.38349	0.51339	0.990562	8440	1	0.64073	0.0319	0.081243	0.954554	1488	3	0.64073
FBgn0035233	4	0.98476	0.98476	0.999097	15391	0	0.44844	0.0319	0.081243	0.954554	1489	3	0.44844
FBgn0263132	6	0.86438	0.86674	0.993146	13573	1	0.37632	0.03193	0.097255	0.954554	1490	4	0.37632
FBgn0086608	6	0.4484	0.60555	0.991024	9199	1	0.11844	0.031959	0.097334	0.954554	1491	2	0.11844
FBgn0033547	3	0.968	0.96817	0.999097	15102	0	0.59093	0.032003	0.079984	0.954554	1492	3	0.59093
FBgn0037621	4	0.94348	0.94324	0.999097	14740	0	0.51677	0.032054	0.081574	0.954554	1493	3	0.51677
FBgn0260799	6	0.99403	0.99401	0.999665	15538	0	0.36822	0.032074	0.0976	0.954554	1494	4	0.36822
FBgn0264985	4	0.8935	0.89301	0.993146	13944	0	0.38269	0.032077	0.08163	0.954554	1495	2	0.38269
FBgn0265575	7	0.91793	0.91797	0.99903	14354	1	0.65947	0.032078	0.10719	0.963101	1496	5	0.65947
FBgn0038337	7	0.95734	0.95729	0.999097	14951	0	0.41961	0.032078	0.10719	0.963101	1497	5	0.41961
FBgn0034950	6	0.99279	0.99284	0.999185	15524	0	0.41909	0.032082	0.09762	0.954554	1498	4	0.41909
FBgn0034265	6	0.57731	0.71336	0.992082	10736	2	0.58829	0.032087	0.097632	0.954554	1499	3	0.58829
FBgn0030969	3	0.65192	0.65239	0.991098	11401	1	0.27409	0.032097	0.080212	0.954554	1500	1	0.27409
FBgn0262515	3	0.96787	0.96804	0.999097	15099	0	0.65947	0.032125	0.080273	0.954554	1501	3	0.65947
FBgn0000250	6	0.037359	0.10923	0.990467	1617	3	-0.051602	0.032204	0.097924	0.955881	1502	3	-0.051602
FBgn0083990	4	0.88912	0.88863	0.993146	13913	0	0.54115	0.032213	0.081909	0.954554	1503	3	0.54115
FBgn0053301	6	0.27479	0.47045	0.990562	6989	1	0.51643	0.032232	0.097992	0.955881	1504	4	0.51643
FBgn0030234	6	0.23715	0.42332	0.990467	6288	1	0.39153	0.032232	0.097992	0.955881	1505	4	0.39153
FBgn0035165	5	0.85788	0.85814	0.993146	13486	0	0.21675	0.032253	0.095826	0.954554	1506	3	0.21675
FBgn0050125	6	0.10381	0.23854	0.990467	3544	2	0.30518	0.032319	0.098195	0.956006	1507	3	0.30518
FBgn0038951	4	0.51008	0.57864	0.990867	9926	1	0.71949	0.032337	0.082172	0.954554	1508	3	0.71949
FBgn0030711	6	0.68699	0.76478	0.992082	11667	1	0.37729	0.032345	0.098267	0.956006	1509	3	0.37729
FBgn0024329	6	0.052376	0.14408	0.990467	2112	3	0.096024	0.032361	0.098311	0.956006	1510	3	0.096024
FBgn0034062	5	0.97328	0.97334	0.999097	15192	0	0.41155	0.032406	0.096233	0.954554	1511	3	0.41155
FBgn0264695	8	0.98135	0.98137	0.999097	15333	0	0.32761	0.032452	0.10999	0.963457	1512	4	0.32761
FBgn0038394	6	0.85627	0.86008	0.993146	13439	1	0.55313	0.032555	0.098792	0.956598	1513	4	0.55313
FBgn0037435	6	0.10456	0.23965	0.990467	3559	2	-0.17542	0.032566	0.098819	0.956598	1514	2	-0.17542
FBgn0051997	6	0.61046	0.73548	0.992082	11074	1	0.55369	0.032587	0.098861	0.956598	1515	4	0.55369
FBgn0033846	6	0.9038	0.90356	0.993146	14031	0	-0.05242	0.032587	0.098861	0.956598	1516	2	-0.05242
FBgn0026268	6	0.26642	0.46161	0.990467	6872	3	-0.083702	0.032724	0.099181	0.957568	1517	2	-0.083702
FBgn0022768	6	0.84178	0.84909	0.993146	13265	1	0.41887	0.032739	0.099207	0.957568	1518	3	0.41887
FBgn0028491	6	0.068734	0.18077	0.990467	2645	2	0.27264	0.032739	0.099207	0.957568	1519	3	0.27264
FBgn0031398	6	0.062927	0.16792	0.990467	2468	2	0.24873	0.032878	0.099541	0.959294	1520	3	0.24873
FBgn0034715	6	0.33796	0.51845	0.990562	7858	2	0.52436	0.032892	0.09957	0.959294	1521	4	0.52436
FBgn0046114	4	0.50248	0.57447	0.990867	9834	1	0.27376	0.032899	0.083343	0.954554	1522	3	0.27376
FBgn0051729	10	0.83852	0.91377	0.99903	13226	1	0.50169	0.032911	0.12076	0.975611	1523	6	0.50169
FBgn0037591	6	0.80838	0.82633	0.993146	12856	1	0.37711	0.032986	0.099797	0.960027	1524	3	0.37711
FBgn0030795	6	0.037714	0.11009	0.990467	1627	2	0.0993	0.033001	0.09983	0.960027	1525	2	0.0993
FBgn0025878	6	0.51777	0.66245	0.991655	10022	2	0.37917	0.033056	0.099962	0.960655	1526	4	0.37917
FBgn0030739	1	0.96692	0.9672	0.999097	15080	0	1.3141	0.033077	0.033049	0.942699	1527	1	1.3141
FBgn0002933	6	0.82508	0.83724	0.993146	13041	1	0.5232	0.033139	0.10014	0.960673	1528	4	0.5232
FBgn0033907	4	0.31294	0.44794	0.990467	7508	2	-0.66942	0.03326	0.084083	0.954554	1529	1	-0.66942
FBgn0035845	5	0.088448	0.19636	0.990467	3206	1	0.093848	0.033327	0.098668	0.956598	1530	2	0.093848
FBgn0029717	6	0.94308	0.94293	0.999097	14736	0	0.31989	0.033341	0.10062	0.963101	1531	3	0.31989
FBgn0037138	6	0.064649	0.17181	0.990467	2518	2	0.011235	0.033502	0.101	0.963101	1532	2	0.011235
FBgn0266827	4	0.10275	0.21034	0.990467	3518	2	0.24823	0.033524	0.084655	0.954554	1533	2	0.24823
FBgn0261287	6	0.50967	0.65573	0.991098	9920	2	-0.0048006	0.033607	0.10127	0.963101	1534	2	-0.0048006
FBgn0265202	4	0.073748	0.16509	0.990467	2805	2	-0.25827	0.033677	0.084977	0.954554	1535	2	-0.25827
FBgn0267550	4	0.31339	0.44843	0.990467	7511	1	0.30777	0.033677	0.084977	0.954554	1536	2	0.30777
FBgn0034795	6	0.3351	0.51618	0.990562	7819	2	0.43174	0.03371	0.10151	0.963101	1537	4	0.43174
FBgn0039770	6	0.9038	0.90356	0.993146	14038	0	0.50299	0.033725	0.10154	0.963101	1538	3	0.50299
FBgn0036655	5	0.95959	0.95978	0.999097	14979	0	0.3794	0.033736	0.09969	0.959862	1539	4	0.3794
FBgn0036839	6	0.83959	0.84753	0.993146	13238	1	0.10655	0.033745	0.10159	0.963101	1540	2	0.10655
FBgn0266568	4	0.71308	0.71709	0.992082	11893	1	0.83446	0.033758	0.085146	0.954554	1541	3	0.83446
FBgn0262033	4	0.97515	0.97503	0.999097	15222	0	0.38926	0.033792	0.085211	0.954554	1542	3	0.38926
FBgn0264291	16	0.13976	0.38745	0.990467	4302	4	-0.17572	0.03387	0.1459	0.983154	1543	6	-0.17572
FBgn0030283	6	0.91984	0.91952	0.99903	14387	0	0.28604	0.033918	0.10202	0.963101	1544	3	0.28604
FBgn0030746	6	0.94126	0.94116	0.999097	14710	0	0.50695	0.033923	0.10203	0.963101	1545	4	0.50695
FBgn0267912	8	0.83247	0.88215	0.993146	13148	1	0.43675	0.033944	0.11395	0.97137	1546	4	0.43675
FBgn0036969	6	0.95911	0.9591	0.999097	14975	0	0.51411	0.033983	0.10216	0.963101	1547	3	0.51411
FBgn0036609	2	0.88195	0.88154	0.993146	13810	0	0.72591	0.034018	0.061735	0.954554	1548	1	0.72591
FBgn0040931	6	0.82715	0.83864	0.993146	13065	1	0.38274	0.034019	0.10226	0.963101	1549	3	0.38274
FBgn0038131	6	0.78648	0.81308	0.993146	12533	1	0.023831	0.034064	0.10237	0.963101	1550	2	0.023831
FBgn0038765	6	0.57098	0.70787	0.992082	10658	1	0.40399	0.034068	0.10237	0.963101	1551	3	0.40399
FBgn0005278	10	0.018259	0.075239	0.987	890	5	-0.1959	0.03411	0.12424	0.978293	1552	3	-0.1959
FBgn0039380	6	0.9877	0.98771	0.999097	15437	0	0.77127	0.034137	0.10255	0.963101	1553	4	0.77127
FBgn0053764	6	0.97096	0.9711	0.999097	15154	0	0.24265	0.034137	0.10255	0.963101	1554	2	0.24265
FBgn0030260	6	0.93579	0.93569	0.999097	14632	0	0.4447	0.034161	0.10261	0.963101	1555	3	0.4447
FBgn0024332	5	0.72135	0.74745	0.992082	11972	1	0.17745	0.034169	0.10081	0.963101	1556	2	0.17745
FBgn0037708	4	0.8984	0.89799	0.993146	13969	0	0.40463	0.034279	0.086252	0.954554	1557	2	0.40463
FBgn0032857	6	0.048497	0.13525	0.990467	1973	3	-0.075826	0.034293	0.10294	0.963101	1558	3	-0.075826
FBgn0027094	6	0.41982	0.58268	0.991024	8872	2	0.25204	0.034369	0.10312	0.963101	1559	3	0.25204
FBgn0050108	6	0.57606	0.71228	0.992082	10720	2	0.17325	0.034369	0.10312	0.963101	1560	3	0.17325
FBgn0267662	4	0.38182	0.5126	0.990562	8417	1	-0.14639	0.034372	0.086441	0.954554	1561	1	-0.14639
FBgn0015320	6	0.44404	0.602	0.991024	9137	1	0.46537	0.034382	0.10315	0.963101	1562	4	0.46537
FBgn0039965	6	0.49145	0.64063	0.991024	9701	2	0.46537	0.034382	0.10315	0.963101	1563	4	0.46537
FBgn0265095	4	0.86343	0.86308	0.993146	13559	0	0.43847	0.034393	0.086483	0.954554	1564	2	0.43847
FBgn0029724	6	0.73085	0.78411	0.992082	12060	1	-0.069412	0.034472	0.10337	0.963101	1565	2	-0.069412
FBgn0036913	6	0.15636	0.31346	0.990467	4668	2	0.059639	0.034542	0.10354	0.963101	1566	1	0.059639
FBgn0264838	4	0.87676	0.8763	0.993146	13736	0	0.45849	0.034556	0.086811	0.954554	1567	3	0.45849
FBgn0243511	6	0.053158	0.14591	0.990467	2138	3	-0.12652	0.034611	0.1037	0.963101	1568	2	-0.12652
FBgn0264441	4	0.0083243	0.02809	0.987	476	3	-0.84961	0.034626	0.086942	0.954554	1569	1	-0.84961
FBgn0266209	4	0.93078	0.93038	0.999097	14557	0	0.54519	0.034626	0.086942	0.954554	1570	2	0.54519
FBgn0029727	6	0.39663	0.56426	0.990867	8605	2	-0.18214	0.034634	0.10376	0.963101	1571	2	-0.18214
FBgn0030349	6	0.95465	0.95461	0.999097	14909	0	0.077424	0.03468	0.10386	0.963101	1572	2	0.077424
FBgn0028504	6	0.69249	0.76707	0.992082	11719	1	0.41458	0.034775	0.10409	0.963101	1573	3	0.41458
FBgn0035028	6	0.98977	0.9898	0.999097	15473	0	0.31181	0.034783	0.1041	0.963101	1574	3	0.31181
FBgn0039453	5	0.58735	0.67477	0.992082	10861	1	-0.0002271	0.034784	0.10239	0.963101	1575	2	-0.0002271
FBgn0262874	6	0.98863	0.98865	0.999097	15459	0	0.33248	0.034827	0.10419	0.963101	1576	3	0.33248
FBgn0031607	6	0.78577	0.81267	0.993146	12529	1	0.36918	0.034835	0.10422	0.963101	1577	4	0.36918
FBgn0011016	6	0.85239	0.857	0.993146	13381	1	-0.087279	0.034853	0.10427	0.963101	1578	1	-0.087279
FBgn0026602	6	0.52584	0.66917	0.991793	10124	1	0.26084	0.034853	0.10427	0.963101	1579	3	0.26084
FBgn0265003	8	0.68718	0.809	0.993146	11669	1	0.24171	0.034874	0.11642	0.975611	1580	4	0.24171
FBgn0004054	6	0.14773	0.30134	0.990467	4459	2	0.030075	0.034924	0.10443	0.963101	1581	2	0.030075
FBgn0034867	4	0.88734	0.88686	0.993146	13889	0	0.22275	0.034997	0.087691	0.954554	1582	1	0.22275
FBgn0036356	4	0.042473	0.10264	0.987	1786	2	-0.29495	0.034997	0.087691	0.954554	1583	2	-0.29495
FBgn0031990	8	0.19474	0.406	0.990467	5438	4	-0.038543	0.035035	0.11687	0.975611	1584	3	-0.038543
FBgn0267617	4	0.95109	0.95093	0.999097	14856	0	0.83833	0.035045	0.087798	0.954554	1585	3	0.83833
FBgn0265598	4	0.095234	0.20181	0.990467	3355	1	0.48876	0.035045	0.087798	0.954554	1586	3	0.48876
FBgn0086446	6	0.53777	0.67933	0.992082	10250	2	0.5909	0.035071	0.10478	0.963101	1587	4	0.5909
FBgn0035501	6	0.37566	0.54772	0.990867	8344	2	-0.22679	0.035096	0.10483	0.963101	1588	2	-0.22679
FBgn0035977	6	0.9521	0.95202	0.999097	14868	0	0.53781	0.035136	0.10492	0.963101	1589	3	0.53781
FBgn0261444	6	0.345	0.52384	0.990562	7947	2	0.303	0.035194	0.10506	0.963101	1590	3	0.303
FBgn0010417	6	0.092129	0.22125	0.990467	3289	1	0.36352	0.035199	0.10506	0.963101	1591	3	0.36352
FBgn0264467	4	0.82667	0.82618	0.993146	13060	0	0.36222	0.035227	0.088191	0.954554	1592	2	0.36222
FBgn0033756	6	0.33742	0.51799	0.990562	7846	1	0.26969	0.035231	0.10514	0.963101	1593	3	0.26969
FBgn0261524	6	0.24955	0.43971	0.990467	6536	2	0.31321	0.035231	0.10514	0.963101	1594	3	0.31321
FBgn0033048	6	0.98744	0.98746	0.999097	15433	0	0.37825	0.035245	0.10517	0.963101	1595	4	0.37825
FBgn0051643	5	0.97601	0.97616	0.999097	15241	0	0.48201	0.035256	0.10361	0.963101	1596	4	0.48201
FBgn0032819	6	0.58769	0.72241	0.992082	10866	2	0.24487	0.035298	0.10531	0.963101	1597	3	0.24487
FBgn0035690	6	0.077692	0.19975	0.990467	2923	3	-0.16754	0.035303	0.10532	0.963101	1598	2	-0.16754
FBgn0037602	6	0.39108	0.55989	0.990867	8527	1	0.34115	0.035314	0.10535	0.963101	1599	4	0.34115
FBgn0050121	4	0.049701	0.11721	0.990467	2023	1	0.28623	0.035325	0.088408	0.954554	1600	2	0.28623
FBgn0086450	5	0.7973	0.80189	0.993146	12770	1	0.3965	0.035454	0.10414	0.963101	1601	4	0.3965
FBgn0037555	6	0.23572	0.42143	0.990467	6261	1	0.24976	0.035511	0.10582	0.963101	1602	3	0.24976
FBgn0260428	6	0.082968	0.20761	0.990467	3068	2	0.66245	0.035515	0.10583	0.963101	1603	4	0.66245
FBgn0052109	6	0.70727	0.77335	0.992082	11854	1	0.4786	0.035515	0.10583	0.963101	1604	3	0.4786
FBgn0265764	4	0.73744	0.73849	0.992082	12116	1	0.41277	0.035545	0.088888	0.954554	1605	2	0.41277
FBgn0050272	6	0.090292	0.21858	0.990467	3253	2	0.22255	0.035598	0.10603	0.963101	1606	2	0.22255
FBgn0032149	6	0.94766	0.94747	0.999097	14800	0	0.58925	0.03563	0.10611	0.963101	1607	4	0.58925
FBgn0261833	4	0.21653	0.3396	0.990467	5896	1	0.32846	0.035638	0.089079	0.954554	1608	2	0.32846
FBgn0265192	6	0.5279	0.67095	0.991846	10139	2	-0.30895	0.035649	0.10615	0.963101	1609	2	-0.30895
FBgn0266235	4	0.90879	0.90847	0.996674	14257	0	0.46303	0.035668	0.089135	0.954554	1610	2	0.46303
FBgn0267261	4	0.62302	0.64872	0.991024	11170	1	0.68765	0.0357	0.089214	0.954554	1611	3	0.68765
FBgn0267528	4	0.33815	0.4762	0.990562	7861	1	0.61523	0.0357	0.089214	0.954554	1612	3	0.61523
FBgn0040372	4	0.041447	0.10052	0.987	1748	2	0.04281	0.035737	0.089277	0.954554	1613	2	0.04281
FBgn0267798	3	0.36281	0.42652	0.990467	8188	1	-0.054692	0.035738	0.085588	0.954554	1614	1	-0.054692
FBgn0030336	6	0.84077	0.84837	0.993146	13252	1	0.13766	0.035788	0.10649	0.963101	1615	3	0.13766
FBgn0026384	6	0.5421	0.68305	0.992082	10329	2	0.29281	0.035857	0.10666	0.963101	1616	3	0.29281
FBgn0031873	4	0.87934	0.87889	0.993146	13774	0	0.02191	0.035876	0.089567	0.954554	1617	1	0.02191
FBgn0031985	4	0.8816	0.88115	0.993146	13804	0	0.46894	0.035911	0.089652	0.954554	1618	3	0.46894
FBgn0037819	6	0.53298	0.67522	0.992082	10204	2	-0.3896	0.035926	0.10681	0.963101	1619	2	-0.3896
FBgn0038588	5	0.44956	0.59449	0.991024	9213	2	0.27948	0.035948	0.10544	0.963101	1620	2	0.27948
FBgn0262029	6	0.48314	0.63379	0.991024	9586	2	-0.045878	0.03603	0.10705	0.963101	1621	2	-0.045878
FBgn0037107	6	0.73815	0.78763	0.992082	12122	1	0.19086	0.03603	0.10705	0.963101	1622	3	0.19086
FBgn0035407	4	0.7368	0.73788	0.992082	12106	1	0.52706	0.036038	0.08992	0.954554	1623	3	0.52706
FBgn0042205	6	0.99753	0.99749	0.999996	15584	0	0.4859	0.03604	0.10708	0.963101	1624	4	0.4859
FBgn0037489	6	0.010614	0.040691	0.987	588	2	0.56221	0.036041	0.10708	0.963101	1625	4	0.56221
FBgn0030686	2	0.96394	0.96394	0.999097	15035	0	0.76753	0.036061	0.065262	0.954554	1626	2	0.76753
FBgn0085193	2	0.62684	0.6266	0.991024	11199	0	1.0266	0.036073	0.065287	0.954554	1627	1	1.0266
FBgn0035429	6	0.042299	0.12088	0.990467	1783	3	0.029862	0.036142	0.10732	0.963101	1628	3	0.029862
FBgn0259195	6	0.97262	0.97271	0.999097	15181	0	0.46029	0.036168	0.10738	0.963101	1629	4	0.46029
FBgn0030028	6	0.4428	0.60102	0.991024	9119	2	0.22527	0.036194	0.10744	0.963101	1630	3	0.22527
FBgn0266949	4	0.82865	0.82811	0.993146	13094	0	0.56795	0.036215	0.09028	0.954554	1631	3	0.56795
FBgn0037724	6	0.84808	0.85375	0.993146	13328	1	0.32613	0.036324	0.10773	0.963101	1632	3	0.32613
FBgn0264341	6	0.80254	0.82268	0.993146	12812	1	0.32494	0.036341	0.10777	0.963101	1633	2	0.32494
FBgn0026430	4	0.056295	0.13058	0.990467	2226	2	0.16935	0.036357	0.090588	0.954554	1634	2	0.16935
FBgn0046685	6	0.82984	0.84054	0.993146	13108	1	-0.3094	0.036361	0.1078	0.963101	1635	2	-0.3094
FBgn0039190	4	0.14951	0.26354	0.990467	4504	2	0.12259	0.036446	0.090769	0.954554	1636	2	0.12259
FBgn0034437	6	0.3898	0.55888	0.990867	8513	1	0.45602	0.036468	0.10808	0.963101	1637	4	0.45602
FBgn0023540	5	0.88412	0.88452	0.993146	13839	0	0.3769	0.036478	0.10677	0.963101	1638	3	0.3769
FBgn0029929	5	0.02823	0.085098	0.987	1275	2	0.27221	0.036478	0.10677	0.963101	1639	3	0.27221
FBgn0036773	5	0.14678	0.29213	0.990467	4439	3	-0.2724	0.036478	0.10677	0.963101	1640	1	-0.2724
FBgn0064119	4	0.5663	0.61174	0.991024	10589	1	0.60101	0.036479	0.090838	0.954554	1641	3	0.60101
FBgn0266813	4	0.82054	0.82003	0.993146	12993	0	0.64832	0.036479	0.090838	0.954554	1642	3	0.64832
FBgn0041225	6	0.9038	0.90356	0.993146	14040	0	0.67346	0.036486	0.10812	0.963101	1643	4	0.67346
FBgn0031940	6	0.57575	0.71199	0.992082	10713	2	0.29919	0.036581	0.10833	0.963101	1644	3	0.29919
FBgn0029911	4	0.2859	0.41743	0.990467	7136	1	0.48661	0.036616	0.091125	0.954554	1645	3	0.48661
FBgn0261613	6	0.59231	0.72649	0.992082	10928	1	0.46959	0.036631	0.10844	0.963101	1646	4	0.46959
FBgn0038271	6	0.98023	0.98027	0.999097	15314	0	0.47254	0.03669	0.1086	0.963101	1647	4	0.47254
FBgn0263995	9	0.74147	0.85243	0.993146	12150	2	-0.11639	0.036718	0.13012	0.980801	1648	1	-0.11639
FBgn0034554	6	0.75187	0.79447	0.993146	12265	1	0.28651	0.036745	0.10874	0.963101	1649	3	0.28651
FBgn0032474	4	0.57977	0.6202	0.991024	10764	1	0.2744	0.036758	0.091403	0.954554	1650	2	0.2744
FBgn0000564	6	0.024294	0.077461	0.987	1127	4	-0.47872	0.036771	0.10879	0.963101	1651	2	-0.47872
FBgn0003950	4	0.58313	0.6223	0.991024	10803	1	-0.051285	0.036777	0.091439	0.954554	1652	1	-0.051285
FBgn0031879	6	0.17534	0.33993	0.990467	5058	2	0.35721	0.036786	0.10883	0.963101	1653	4	0.35721
FBgn0028897	6	0.60584	0.73391	0.992082	11035	1	0.45173	0.036786	0.10883	0.963101	1654	4	0.45173
FBgn0031707	6	0.67288	0.759	0.992082	11551	1	0.19035	0.03679	0.10884	0.963101	1655	3	0.19035
FBgn0030439	6	0.82765	0.83897	0.993146	13072	1	0.81061	0.03679	0.10884	0.963101	1656	4	0.81061
FBgn0030947	6	0.58877	0.72333	0.992082	10880	1	-0.15753	0.03679	0.10884	0.963101	1657	1	-0.15753
FBgn0035187	6	0.21754	0.39719	0.990467	5925	3	-0.26167	0.03679	0.10884	0.963101	1658	2	-0.26167
FBgn0031563	4	0.21788	0.34113	0.990467	5931	1	0.64628	0.036819	0.091507	0.954554	1659	3	0.64628
FBgn0266856	4	0.88734	0.88686	0.993146	13884	0	0.20481	0.036824	0.091519	0.954554	1660	1	0.20481
FBgn0034997	6	0.25453	0.44618	0.990467	6630	3	0.23327	0.036857	0.10898	0.963101	1661	3	0.23327
FBgn0267814	4	0.18715	0.30632	0.990467	5294	1	0.45782	0.036878	0.091633	0.954554	1662	2	0.45782
FBgn0040607	6	0.42644	0.58796	0.991024	8941	1	0.42406	0.036878	0.10903	0.963101	1663	3	0.42406
FBgn0038122	6	0.74245	0.78975	0.992082	12164	1	0.53924	0.036919	0.10914	0.963101	1664	4	0.53924
FBgn0266972	4	0.5751	0.61724	0.991024	10705	1	-0.11763	0.036939	0.091758	0.954554	1665	1	-0.11763
FBgn0032415	6	0.93094	0.93078	0.999097	14558	0	0.5401	0.036955	0.10923	0.963101	1666	3	0.5401
FBgn0053218	4	0.73949	0.74034	0.992082	12135	1	0.3938	0.036962	0.091798	0.954554	1667	2	0.3938
FBgn0004832	4	0.88629	0.88584	0.993146	13865	0	0.314	0.036971	0.091818	0.954554	1668	3	0.314
FBgn0003870	13	0.36688	0.65622	0.991098	8245	3	-0.19918	0.037061	0.14487	0.983154	1669	4	-0.19918
FBgn0267783	4	0.71622	0.71978	0.992082	11933	1	0.19512	0.037124	0.092145	0.954554	1670	2	0.19512
FBgn0028422	6	0.86681	0.86879	0.993146	13597	1	0.72306	0.037135	0.10962	0.963101	1671	4	0.72306
FBgn0028919	6	0.86179	0.86456	0.993146	13532	1	0.43221	0.037135	0.10962	0.963101	1672	3	0.43221
FBgn0032471	6	0.20197	0.37638	0.990467	5587	1	0.54145	0.037135	0.10962	0.963101	1673	4	0.54145
FBgn0263661	4	0.96238	0.96216	0.999097	15013	0	0.56448	0.037137	0.092166	0.954554	1674	3	0.56448
FBgn0270927	4	0.91526	0.91498	0.99903	14305	0	0.48465	0.037137	0.092166	0.954554	1675	3	0.48465
FBgn0266535	4	0.47199	0.55792	0.990867	9458	1	0.54706	0.037137	0.092166	0.954554	1676	2	0.54706
FBgn0032072	6	0.29754	0.48759	0.990562	7287	2	0.65941	0.037201	0.10976	0.963101	1677	4	0.65941
FBgn0030979	6	0.92907	0.92889	0.999097	14530	0	0.51181	0.037201	0.10976	0.963101	1678	4	0.51181
FBgn0000121	6	0.96622	0.96631	0.999097	15065	0	0.69768	0.037201	0.10976	0.963101	1679	4	0.69768
FBgn0039698	6	0.54444	0.68512	0.992082	10361	1	0.54086	0.037201	0.10976	0.963101	1680	4	0.54086
FBgn0035807	6	0.56639	0.70388	0.992082	10597	1	0.48786	0.037201	0.10976	0.963101	1681	4	0.48786
FBgn0011596	6	0.50582	0.65256	0.991098	9869	2	0.62465	0.037201	0.10976	0.963101	1682	4	0.62465
FBgn0032597	4	0.12715	0.23803	0.990467	4036	1	0.5759	0.037236	0.092385	0.954554	1683	3	0.5759
FBgn0267104	6	0.83171	0.84186	0.993146	13137	1	0.069879	0.037239	0.10986	0.963377	1684	2	0.069879
FBgn0267787	4	0.98235	0.98235	0.999097	15346	0	0.52231	0.037378	0.092679	0.954554	1685	3	0.52231
FBgn0010113	6	0.048112	0.13437	0.990467	1955	3	-0.46721	0.037378	0.11017	0.964498	1686	1	-0.46721
FBgn0267457	4	0.1543	0.26905	0.990467	4624	2	-0.21347	0.037471	0.092884	0.954554	1687	1	-0.21347
FBgn0031902	6	0.42872	0.5898	0.991024	8966	2	-0.07993	0.037585	0.11067	0.965173	1688	2	-0.07993
FBgn0003137	6	0.33742	0.51799	0.990562	7845	1	0.44787	0.037598	0.11069	0.965173	1689	4	0.44787
FBgn0030696	6	0.11033	0.24799	0.990467	3699	1	0.4872	0.037598	0.11069	0.965173	1690	4	0.4872
FBgn0267771	4	0.21342	0.33612	0.990467	5836	2	-0.36687	0.037609	0.093157	0.954554	1691	1	-0.36687
FBgn0036857	2	0.63532	0.63504	0.991024	11272	0	0.40851	0.037613	0.067967	0.954554	1692	1	0.40851
FBgn0036198	6	0.92274	0.92251	0.99903	14439	0	0.40336	0.037629	0.11077	0.965173	1693	3	0.40336
FBgn0038201	6	0.042891	0.12227	0.990467	1795	2	-0.032703	0.037654	0.11083	0.965173	1694	2	-0.032703
FBgn0033158	6	0.98661	0.98665	0.999097	15420	0	0.4644	0.037678	0.11089	0.965173	1695	3	0.4644
FBgn0266319	4	0.50603	0.57644	0.990867	9872	1	0.59177	0.037745	0.093437	0.954554	1696	3	0.59177
FBgn0066304	2	0.86307	0.86277	0.993146	13552	0	0.82071	0.037753	0.068189	0.954554	1697	1	0.82071
FBgn0041094	6	0.77872	0.80868	0.993146	12493	1	0.21641	0.037791	0.11118	0.965173	1698	3	0.21641
FBgn0034717	6	0.77872	0.80868	0.993146	12494	1	-0.025241	0.037792	0.11118	0.965173	1699	2	-0.025241
FBgn0015575	6	0.99662	0.99659	0.999996	15569	0	0.50905	0.037795	0.11119	0.965173	1700	4	0.50905
FBgn0261244	6	0.98915	0.98918	0.999097	15468	0	0.40949	0.037829	0.11127	0.965173	1701	2	0.40949
FBgn0034724	6	0.13259	0.28009	0.990467	4139	2	0.33727	0.037917	0.11148	0.966225	1702	3	0.33727
FBgn0035592	5	0.88716	0.88753	0.993146	13880	0	0.055966	0.037954	0.11059	0.965173	1703	2	0.055966
FBgn0032311	6	0.75439	0.79573	0.993146	12287	1	0.20795	0.03803	0.11175	0.966722	1704	3	0.20795
FBgn0036365	6	0.45243	0.6088	0.991024	9244	2	0.014391	0.038046	0.11179	0.966722	1705	2	0.014391
FBgn0031926	6	0.1963	0.36859	0.990467	5477	3	0.26477	0.038046	0.11179	0.966722	1706	3	0.26477
FBgn0051867	6	0.54559	0.68609	0.992082	10376	2	0.090725	0.038137	0.11199	0.967989	1707	3	0.090725
FBgn0034361	4	0.88834	0.88785	0.993146	13907	0	0.89836	0.038165	0.094319	0.954554	1708	3	0.89836
FBgn0035331	5	0.092166	0.20259	0.990467	3291	1	0.67267	0.038243	0.1113	0.965173	1709	3	0.67267
FBgn0039916	6	0.9324	0.93223	0.999097	14578	0	0.2701	0.038262	0.11227	0.969271	1710	3	0.2701
FBgn0050067	6	0.70257	0.77134	0.992082	11814	1	-0.099577	0.038262	0.11227	0.969271	1711	2	-0.099577
FBgn0050431	6	0.76352	0.8005	0.993146	12377	1	0.45417	0.038432	0.11265	0.97137	1712	3	0.45417
FBgn0034552	6	0.11244	0.25113	0.990467	3739	3	-0.23285	0.038482	0.11276	0.97137	1713	2	-0.23285
FBgn0266238	4	0.13877	0.25145	0.990467	4278	2	0.17594	0.03849	0.09501	0.954554	1714	2	0.17594
FBgn0267030	4	0.72732	0.7295	0.992082	12027	1	0.39202	0.038498	0.095026	0.954554	1715	3	0.39202
FBgn0053775	6	0.055064	0.1503	0.990467	2197	1	0.1722	0.038534	0.11287	0.97137	1716	2	0.1722
FBgn0032935	6	0.49005	0.63948	0.991024	9683	2	-0.03791	0.038551	0.11291	0.97137	1717	3	-0.03791
FBgn0028982	4	0.66091	0.67579	0.992082	11457	1	0.53694	0.038556	0.095143	0.954554	1718	3	0.53694
FBgn0039488	4	0.33365	0.47119	0.990562	7797	2	0.018358	0.038579	0.0952	0.954554	1719	2	0.018358
FBgn0040723	6	0.30462	0.49287	0.990562	7383	2	-0.34648	0.03862	0.11309	0.97137	1720	1	-0.34648
FBgn0034066	1	0.96137	0.9617	0.999097	14997	0	1.156	0.038627	0.038565	0.954554	1721	1	1.156
FBgn0052082	6	0.74245	0.78975	0.992082	12166	1	0.14719	0.038689	0.11326	0.97137	1722	2	0.14719
FBgn0262690	4	0.87109	0.87068	0.993146	13671	0	0.75987	0.038713	0.095483	0.954554	1723	3	0.75987
FBgn0052219	6	0.11042	0.24811	0.990467	3703	2	0.1666	0.038736	0.11337	0.97137	1724	2	0.1666
FBgn0003719	6	0.96608	0.96615	0.999097	15064	0	0.54437	0.038822	0.11357	0.97137	1725	3	0.54437
FBgn0263988	6	0.18999	0.35999	0.990467	5340	1	0.24019	0.038827	0.11359	0.97137	1726	2	0.24019
FBgn0262817	6	0.50027	0.64791	0.991024	9808	2	0.059009	0.038896	0.11376	0.97137	1727	2	0.059009
FBgn0034204	6	0.031601	0.095422	0.987	1416	3	-0.445	0.0389	0.11377	0.97137	1728	2	-0.445
FBgn0262115	6	0.68678	0.76469	0.992082	11665	1	0.47935	0.038919	0.11381	0.97137	1729	4	0.47935
FBgn0038609	2	0.3074	0.32693	0.990467	7429	1	-0.059709	0.038965	0.070364	0.954554	1730	1	-0.059709
FBgn0022800	6	0.16288	0.32257	0.990467	4786	2	-0.016526	0.038965	0.11392	0.97137	1731	2	-0.016526
FBgn0267738	4	0.032013	0.080783	0.987	1438	3	-0.7254	0.038971	0.096017	0.954554	1732	1	-0.7254
FBgn0034304	4	0.97917	0.97913	0.999097	15296	0	0.28445	0.039108	0.096302	0.954554	1733	3	0.28445
FBgn0033448	6	0.42798	0.58922	0.991024	8957	1	0.2376	0.039138	0.11431	0.97137	1734	4	0.2376
FBgn0033551	6	0.10602	0.24171	0.990467	3593	3	-0.50035	0.039172	0.11438	0.97137	1735	1	-0.50035
FBgn0023213	6	0.082613	0.2071	0.990467	3059	1	0.24824	0.039199	0.11445	0.97137	1736	4	0.24824
FBgn0266747	4	0.33634	0.47419	0.990562	7833	1	0.40309	0.039238	0.096551	0.954554	1737	3	0.40309
FBgn0037288	6	0.15632	0.3134	0.990467	4665	3	0.14969	0.039276	0.11463	0.97137	1738	3	0.14969
FBgn0040237	4	0.30748	0.44175	0.990467	7432	1	-0.20968	0.039294	0.09667	0.954554	1739	1	-0.20968
FBgn0267063	4	0.010489	0.033617	0.987	579	2	-0.44182	0.039294	0.09667	0.954554	1740	1	-0.44182
FBgn0022349	8	0.98177	0.98179	0.999097	15338	0	0.44746	0.039317	0.12788	0.980801	1741	4	0.44746
FBgn0027525	6	0.60413	0.73334	0.992082	11019	1	0.45725	0.039338	0.11478	0.97137	1742	4	0.45725
FBgn0032252	6	0.49224	0.64131	0.991024	9714	2	0.3365	0.039375	0.11486	0.97137	1743	4	0.3365
FBgn0039523	6	0.36966	0.54293	0.990562	8280	1	0.67212	0.039377	0.11486	0.97137	1744	4	0.67212
FBgn0038832	6	0.43216	0.59264	0.991024	9005	2	0.16537	0.039393	0.1149	0.97137	1745	3	0.16537
FBgn0037592	6	0.26589	0.46098	0.990467	6856	2	-0.16481	0.039448	0.11505	0.97137	1746	3	-0.16481
FBgn0010812	6	0.022639	0.07332	0.987	1064	1	0.2245	0.039451	0.11506	0.97137	1747	3	0.2245
FBgn0030120	6	0.9038	0.90356	0.993146	14084	0	0.59692	0.039587	0.11536	0.972665	1748	4	0.59692
FBgn0010398	6	0.9038	0.90356	0.993146	14148	0	0.48812	0.039602	0.1154	0.972665	1749	3	0.48812
FBgn0031533	6	0.29522	0.48584	0.990562	7267	2	0.44277	0.039665	0.11556	0.97347	1750	4	0.44277
FBgn0262527	6	0.25	0.4403	0.990467	6545	2	0.30974	0.039711	0.11565	0.973746	1751	4	0.30974
FBgn0260942	9	0.2541	0.49148	0.990562	6621	1	0.31764	0.039724	0.13734	0.980801	1752	4	0.31764
FBgn0038861	4	0.49362	0.56952	0.990867	9732	1	0.49102	0.03973	0.097575	0.954554	1753	2	0.49102
FBgn0052163	4	0.98118	0.98117	0.999097	15329	0	0.68332	0.039765	0.097641	0.954554	1754	3	0.68332
FBgn0020388	6	0.18693	0.35581	0.990467	5285	2	0.10103	0.039793	0.11583	0.974206	1755	2	0.10103
FBgn0038659	6	0.39306	0.56141	0.990867	8555	1	0.10643	0.039793	0.11583	0.974206	1756	2	0.10643
FBgn0033457	5	0.61326	0.68725	0.992082	11093	1	-0.12647	0.039906	0.11431	0.97137	1757	2	-0.12647
FBgn0050183	5	0.74293	0.7615	0.992082	12173	1	0.49924	0.039906	0.11431	0.97137	1758	2	0.49924
FBgn0032746	5	0.51597	0.64371	0.991024	9997	1	-0.075773	0.039906	0.11431	0.97137	1759	1	-0.075773
FBgn0039250	6	0.27613	0.4715	0.990562	7002	2	0.3605	0.039951	0.11618	0.975611	1760	3	0.3605
FBgn0264358	4	0.93059	0.93019	0.999097	14553	0	0.42501	0.039993	0.098128	0.956006	1761	3	0.42501
FBgn0039260	6	0.21849	0.39849	0.990467	5945	2	0.15978	0.04	0.11629	0.975611	1762	2	0.15978
FBgn0085491	6	0.23972	0.42666	0.990467	6345	2	0.18761	0.040014	0.11633	0.975611	1763	2	0.18761
FBgn0032988	5	0.11668	0.24342	0.990467	3828	2	0.46247	0.040024	0.11453	0.97137	1764	3	0.46247
FBgn0030805	6	0.22494	0.40699	0.990467	6046	1	0.38443	0.040079	0.11647	0.975611	1765	4	0.38443
FBgn0031759	8	0.34916	0.5663	0.990867	7993	2	0.023848	0.040105	0.12989	0.980801	1766	3	0.023848
FBgn0034618	8	0.10234	0.25753	0.990467	3505	4	-0.25309	0.040115	0.12991	0.980801	1767	3	-0.25309
FBgn0266557	6	0.20144	0.37567	0.990467	5579	3	-0.17551	0.040172	0.11668	0.975611	1768	1	-0.17551
FBgn0267102	4	0.9842	0.98421	0.999097	15379	0	0.41618	0.04019	0.098551	0.956598	1769	3	0.41618
FBgn0052703	6	0.87171	0.87293	0.993146	13676	1	0.56364	0.040246	0.11684	0.975611	1770	4	0.56364
FBgn0043806	6	0.23572	0.42143	0.990467	6262	2	-0.16298	0.040251	0.11686	0.975611	1771	2	-0.16298
FBgn0262025	4	0.88912	0.88863	0.993146	13912	0	0.86212	0.0403	0.098776	0.956598	1772	3	0.86212
FBgn0032601	6	0.82191	0.8351	0.993146	13006	1	0.36583	0.040443	0.1173	0.975611	1773	4	0.36583
FBgn0034943	6	0.95926	0.95925	0.999097	14976	0	0.34739	0.040443	0.1173	0.975611	1774	4	0.34739
FBgn0036881	6	0.080786	0.20439	0.990467	3004	3	0.053614	0.040472	0.11736	0.975611	1775	3	0.053614
FBgn0030215	6	0.041352	0.11866	0.990467	1745	3	-0.65614	0.040482	0.11738	0.975611	1776	1	-0.65614
FBgn0031832	4	0.98463	0.98464	0.999097	15387	0	0.76608	0.040515	0.099193	0.957568	1777	3	0.76608
FBgn0262982	3	0.37965	0.43756	0.990467	8392	1	1.269	0.040516	0.092509	0.954554	1778	2	1.269
FBgn0038548	6	0.48928	0.63884	0.991024	9669	2	0.26806	0.040551	0.11756	0.975611	1779	3	0.26806
FBgn0016034	6	0.88527	0.88523	0.993146	13851	1	0.071861	0.040589	0.11764	0.975611	1780	3	0.071861
FBgn0004618	4	0.28211	0.41318	0.990467	7087	1	0.57775	0.04066	0.099493	0.959294	1781	3	0.57775
FBgn0003328	6	0.26456	0.45921	0.990467	6832	2	-0.099407	0.040727	0.11797	0.975611	1782	2	-0.099407
FBgn0262812	6	0.22745	0.41037	0.990467	6092	1	0.3632	0.040758	0.11804	0.975611	1783	4	0.3632
FBgn0004863	6	0.15144	0.30655	0.990467	4547	2	-0.46378	0.040783	0.11809	0.975611	1784	2	-0.46378
FBgn0037244	6	0.020629	0.068243	0.987	986	2	0.54673	0.040855	0.11828	0.975611	1785	4	0.54673
FBgn0038592	6	0.43291	0.59323	0.991024	9017	2	0.4741	0.040855	0.11828	0.975611	1786	4	0.4741
FBgn0053920	6	0.0028514	0.012405	0.91437	187	4	-0.7719	0.040861	0.1183	0.975611	1787	2	-0.7719
FBgn0040965	4	0.52802	0.58895	0.991024	10142	1	0.305	0.040914	0.10002	0.960655	1788	2	0.305
FBgn0265790	4	0.98863	0.98865	0.999097	15461	0	0.61257	0.040977	0.10014	0.960673	1789	3	0.61257
FBgn0037146	6	0.53298	0.67522	0.992082	10202	2	0.25135	0.041024	0.11869	0.975611	1790	3	0.25135
FBgn0264299	4	0.94942	0.94926	0.999097	14829	0	0.64633	0.041037	0.10027	0.961274	1791	3	0.64633
FBgn0036760	6	0.70981	0.77446	0.992082	11868	1	0.49993	0.04111	0.11889	0.975611	1792	4	0.49993
FBgn0039654	6	0.37332	0.54585	0.990867	8321	2	0.1233	0.04111	0.11889	0.975611	1793	3	0.1233
FBgn0033902	4	0.0010692	0.0038272	0.91437	77	1	0.67028	0.04117	0.10054	0.963101	1794	3	0.67028
FBgn0034293	6	0.9038	0.90356	0.993146	14136	0	0.39484	0.041171	0.11904	0.975611	1795	4	0.39484
FBgn0050277	6	0.24879	0.43872	0.990467	6529	1	0.23485	0.041221	0.11917	0.975611	1796	3	0.23485
FBgn0001235	6	0.84835	0.85395	0.993146	13330	1	0.052278	0.041221	0.11917	0.975611	1797	2	0.052278
FBgn0035539	6	0.88271	0.88283	0.993146	13823	1	0.20887	0.041221	0.11917	0.975611	1798	3	0.20887
FBgn0037577	6	0.0089488	0.034847	0.987	507	3	-0.4387	0.041221	0.11917	0.975611	1799	2	-0.4387
FBgn0259821	6	0.25598	0.44807	0.990467	6655	1	0.38749	0.041221	0.11917	0.975611	1800	3	0.38749
FBgn0037234	3	0.35161	0.41927	0.990467	8026	1	0.19267	0.041261	0.093592	0.954554	1801	1	0.19267
FBgn0267688	4	0.27028	0.3999	0.990467	6933	1	0.52509	0.041316	0.10084	0.963101	1802	3	0.52509
FBgn0038100	6	0.9038	0.90356	0.993146	14217	0	0.33756	0.041334	0.11942	0.975611	1803	3	0.33756
FBgn0038257	7	0.26809	0.4681	0.990562	6892	1	0.22768	0.041355	0.13066	0.980801	1804	3	0.22768
FBgn0031344	6	0.49846	0.64639	0.991024	9792	2	0.38384	0.041366	0.1195	0.975611	1805	3	0.38384
FBgn0016685	6	0.95465	0.95461	0.999097	14912	0	0.57454	0.041377	0.11953	0.975611	1806	4	0.57454
FBgn0034908	6	0.75888	0.79803	0.993146	12337	1	0.70244	0.041381	0.11954	0.975611	1807	4	0.70244
FBgn0037996	6	0.22359	0.40519	0.990467	6023	1	0.53351	0.041381	0.11954	0.975611	1808	4	0.53351
FBgn0036782	6	0.64437	0.74782	0.992082	11337	1	0.68211	0.041381	0.11954	0.975611	1809	4	0.68211
FBgn0033751	6	0.9038	0.90356	0.993146	14194	0	0.67352	0.041381	0.11954	0.975611	1810	4	0.67352
FBgn0036999	6	0.97612	0.97617	0.999097	15244	0	0.67475	0.041381	0.11954	0.975611	1811	4	0.67475
FBgn0033463	6	0.9224	0.92214	0.99903	14431	0	0.46999	0.041381	0.11954	0.975611	1812	4	0.46999
FBgn0051522	8	0.36835	0.58519	0.991024	8264	3	0.1657	0.041407	0.13328	0.980801	1813	4	0.1657
FBgn0046999	6	0.028188	0.087111	0.987	1274	2	0.18277	0.041421	0.11963	0.975611	1814	3	0.18277
FBgn0032494	6	0.73729	0.78724	0.992082	12111	1	0.0039781	0.041446	0.11969	0.975611	1815	2	0.0039781
FBgn0032773	5	0.85788	0.85814	0.993146	13467	0	0.093848	0.041458	0.11717	0.975611	1816	2	0.093848
FBgn0243513	6	0.03717	0.10881	0.990467	1613	1	0.36005	0.041498	0.11981	0.975611	1817	3	0.36005
FBgn0004908	6	0.52026	0.66451	0.991655	10046	1	-0.073809	0.041515	0.11984	0.975611	1818	2	-0.073809
FBgn0266942	4	0.94305	0.94282	0.999097	14735	0	0.40448	0.041556	0.10132	0.963101	1819	3	0.40448
FBgn0029529	4	0.52936	0.58973	0.991024	10158	1	0.47386	0.041556	0.10132	0.963101	1820	3	0.47386
FBgn0036039	6	0.15812	0.31592	0.990467	4699	2	0.38845	0.041584	0.12002	0.975611	1821	4	0.38845
FBgn0015218	6	0.44916	0.60618	0.991024	9209	2	-0.05773	0.041606	0.12007	0.975611	1822	2	-0.05773
FBgn0051961	4	0.49029	0.56778	0.990867	9685	1	0.61536	0.041618	0.10145	0.963101	1823	3	0.61536
FBgn0001091	4	0.59163	0.62778	0.991024	10910	1	0.50688	0.041622	0.10146	0.963101	1824	2	0.50688
FBgn0011656	9	0.82177	0.90086	0.993146	13000	1	0.2231	0.041695	0.14205	0.983154	1825	4	0.2231
FBgn0032447	10	0.10164	0.27485	0.990467	3490	2	0.30753	0.04172	0.1458	0.983154	1826	6	0.30753
FBgn0038641	6	0.75747	0.79731	0.993146	12322	1	0.37154	0.041739	0.12037	0.975611	1827	4	0.37154
FBgn0033154	6	0.41915	0.58211	0.991024	8866	1	0.36321	0.041741	0.12038	0.975611	1828	3	0.36321
FBgn0038303	4	0.88636	0.88591	0.993146	13866	0	0.19583	0.041772	0.10175	0.963101	1829	2	0.19583
FBgn0038076	6	0.88393	0.88396	0.993146	13832	1	0.49601	0.041803	0.12052	0.975611	1830	4	0.49601
FBgn0042710	6	0.01125	0.042987	0.987	612	2	0.30653	0.041847	0.12062	0.975611	1831	3	0.30653
FBgn0266399	4	0.10005	0.20734	0.990467	3469	1	0.3798	0.041851	0.10191	0.963101	1832	2	0.3798
FBgn0267960	4	0.74911	0.74935	0.992082	12231	1	0.43496	0.041853	0.10192	0.963101	1833	3	0.43496
FBgn0259242	6	0.59996	0.73186	0.992082	10989	1	0.026011	0.041859	0.12065	0.975611	1834	1	0.026011
FBgn0267924	4	0.13986	0.25266	0.990467	4307	2	0.14613	0.041903	0.10202	0.963101	1835	2	0.14613
FBgn0038943	6	0.97838	0.97845	0.999097	15283	0	0.36137	0.041917	0.12079	0.975611	1836	4	0.36137
FBgn0052364	6	0.51093	0.65677	0.991098	9938	2	-0.13188	0.041928	0.1208	0.975611	1837	2	-0.13188
FBgn0264840	4	0.10501	0.21297	0.990467	3565	1	0.35374	0.041969	0.10216	0.963101	1838	3	0.35374
FBgn0026176	4	0.9671	0.9669	0.999097	15083	0	0.41509	0.042028	0.10228	0.963101	1839	3	0.41509
FBgn0025111	3	0.72541	0.72546	0.992082	12015	0	-0.056865	0.042041	0.09472	0.954554	1840	1	-0.056865
FBgn0250823	6	0.23791	0.42434	0.990467	6309	2	0.25417	0.042066	0.12113	0.976844	1841	3	0.25417
FBgn0033983	4	0.93062	0.93022	0.999097	14554	0	0.48632	0.042136	0.10249	0.963101	1842	3	0.48632
FBgn0031182	6	0.24245	0.43035	0.990467	6401	2	0.23979	0.042188	0.12142	0.976844	1843	3	0.23979
FBgn0027538	6	0.96954	0.96965	0.999097	15128	0	0.3277	0.042228	0.12152	0.976844	1844	4	0.3277
FBgn0038892	6	0.055958	0.15229	0.990467	2219	2	0.37454	0.042228	0.12152	0.976844	1845	4	0.37454
FBgn0085264	1	0.95772	0.95804	0.999097	14956	0	1.3568	0.042282	0.042234	0.954554	1846	1	1.3568
FBgn0040900	6	0.016325	0.057162	0.987	821	2	0.37722	0.042316	0.1217	0.977813	1847	4	0.37722
FBgn0033273	6	0.23569	0.42138	0.990467	6259	3	0.21846	0.042465	0.12204	0.97821	1848	3	0.21846
FBgn0038123	6	0.49273	0.6417	0.991024	9722	2	0.25038	0.042465	0.12204	0.97821	1849	3	0.25038
FBgn0259697	6	0.88804	0.88789	0.993146	13903	1	0.67575	0.042476	0.12206	0.97821	1850	4	0.67575
FBgn0263397	9	0.97845	0.97841	0.999097	15285	0	0.042194	0.042497	0.14395	0.983154	1851	3	0.042194
FBgn0033973	6	0.55346	0.69277	0.992082	10468	2	0.010783	0.042597	0.12233	0.978293	1852	3	0.010783
FBgn0058053	4	0.19682	0.31734	0.990467	5490	2	0.37304	0.04261	0.10349	0.963101	1853	2	0.37304
FBgn0266390	4	0.89501	0.89457	0.993146	13949	0	0.3923	0.04261	0.10349	0.963101	1854	2	0.3923
FBgn0051313	6	0.9038	0.90356	0.993146	14041	0	0.36606	0.042632	0.1224	0.978293	1855	3	0.36606
FBgn0024807	6	0.93258	0.93241	0.999097	14580	0	0.27747	0.042632	0.1224	0.978293	1856	3	0.27747
FBgn0030899	6	0.50271	0.6499	0.991024	9839	1	0.37633	0.042666	0.12249	0.978293	1857	4	0.37633
FBgn0259204	3	0.83019	0.82982	0.993146	13112	0	1.0308	0.042683	0.095648	0.954554	1858	2	1.0308
FBgn0038181	6	0.99305	0.99306	0.999185	15531	0	0.32065	0.042711	0.1226	0.978293	1859	3	0.32065
FBgn0267142	4	0.76038	0.76004	0.992082	12347	1	-0.21117	0.042749	0.10378	0.963101	1860	1	-0.21117
FBgn0260932	6	0.49261	0.6416	0.991024	9719	1	0.43876	0.042824	0.12288	0.978293	1861	3	0.43876
FBgn0000078	2	0.95717	0.95708	0.999097	14946	0	0.60882	0.042834	0.077033	0.954554	1862	2	0.60882
FBgn0265979	4	0.98784	0.98785	0.999097	15441	0	0.38998	0.042865	0.10403	0.963101	1863	3	0.38998
FBgn0003082	4	0.026824	0.069708	0.987	1225	2	-0.33591	0.042888	0.10407	0.963101	1864	1	-0.33591
FBgn0023549	4	0.031126	0.07895	0.987	1396	2	-0.6025	0.042957	0.10422	0.963101	1865	2	-0.6025
FBgn0038569	6	0.80053	0.82148	0.993146	12795	1	0.29748	0.043056	0.12343	0.978293	1866	3	0.29748
FBgn0040942	6	0.56639	0.70388	0.992082	10599	1	0.21888	0.043108	0.12355	0.978293	1867	3	0.21888
FBgn0267083	4	0.16141	0.27721	0.990467	4766	2	0.071406	0.043141	0.10458	0.963101	1868	2	0.071406
FBgn0085285	6	0.55185	0.6914	0.992082	10448	1	0.3795	0.043248	0.12388	0.978293	1869	3	0.3795
FBgn0035847	5	0.15882	0.31128	0.990467	4715	2	-0.013271	0.043291	0.12051	0.975611	1870	2	-0.013271
FBgn0262840	5	0.79583	0.80066	0.993146	12761	1	0.24272	0.043352	0.12063	0.975611	1871	3	0.24272
FBgn0261953	9	0.59233	0.77565	0.992082	10929	2	0.41182	0.043423	0.14617	0.983154	1872	4	0.41182
FBgn0039042	6	0.022009	0.07172	0.987	1045	3	-0.35262	0.043483	0.12444	0.978293	1873	2	-0.35262
FBgn0261245	6	0.065053	0.17266	0.990467	2532	2	0.32446	0.043511	0.12449	0.978293	1874	3	0.32446
FBgn0039634	6	0.38382	0.55407	0.990867	8443	1	0.39616	0.043527	0.12453	0.978293	1875	4	0.39616
FBgn0266738	4	0.69178	0.69956	0.992082	11715	1	0.58912	0.043538	0.10541	0.963101	1876	3	0.58912
FBgn0259712	6	0.98271	0.98272	0.999097	15349	0	0.5396	0.043613	0.12473	0.978293	1877	4	0.5396
FBgn0052246	6	0.87847	0.87892	0.993146	13763	1	0.066504	0.043613	0.12473	0.978293	1878	2	0.066504
FBgn0264490	6	0.09862	0.23095	0.990467	3434	2	0.0028175	0.043613	0.12473	0.978293	1879	2	0.0028175
FBgn0033888	6	0.15976	0.31828	0.990467	4735	3	-0.15645	0.043613	0.12473	0.978293	1880	1	-0.15645
FBgn0033903	6	0.64171	0.74684	0.992082	11319	1	-0.041603	0.043613	0.12473	0.978293	1881	2	-0.041603
FBgn0000150	6	0.05537	0.15096	0.990467	2207	2	0.26997	0.043613	0.12473	0.978293	1882	3	0.26997
FBgn0035954	6	0.9038	0.90356	0.993146	14199	0	0.17467	0.043613	0.12473	0.978293	1883	2	0.17467
FBgn0263841	6	0.56392	0.70177	0.992082	10570	1	0.23996	0.043613	0.12473	0.978293	1884	3	0.23996
FBgn0032304	6	0.31111	0.49781	0.990562	7484	1	0.011578	0.043613	0.12473	0.978293	1885	2	0.011578
FBgn0031057	6	0.3269	0.50992	0.990562	7721	2	-0.044683	0.043613	0.12473	0.978293	1886	2	-0.044683
FBgn0260858	6	0.96974	0.96986	0.999097	15131	0	0.37715	0.043613	0.12473	0.978293	1887	3	0.37715
FBgn0261562	6	0.10557	0.24107	0.990467	3579	2	0.08615	0.043613	0.12473	0.978293	1888	2	0.08615
FBgn0027359	6	0.05846	0.158	0.990467	2297	3	-0.31089	0.043613	0.12473	0.978293	1889	2	-0.31089
FBgn0030937	3	0.86638	0.86631	0.993146	13591	0	0.6102	0.043636	0.097037	0.954554	1890	2	0.6102
FBgn0031254	4	0.93698	0.93671	0.999097	14646	0	0.34344	0.04368	0.1057	0.963101	1891	2	0.34344
FBgn0036469	3	0.94964	0.94987	0.999097	14836	0	0.64546	0.043742	0.097194	0.954554	1892	2	0.64546
FBgn0261046	5	0.15987	0.31291	0.990467	4740	3	-0.29942	0.043811	0.12145	0.976844	1893	1	-0.29942
FBgn0035708	7	0.4964	0.66515	0.991655	9768	2	0.10682	0.043881	0.13602	0.980801	1894	3	0.10682
FBgn0033246	8	0.18209	0.38659	0.990467	5179	2	0.040063	0.043949	0.13986	0.983154	1895	3	0.040063
FBgn0022700	6	0.070468	0.18457	0.990467	2691	2	0.33847	0.04396	0.12556	0.980801	1896	4	0.33847
FBgn0028398	6	0.35392	0.53072	0.990562	8065	1	0.50406	0.043975	0.12559	0.980801	1897	3	0.50406
FBgn0267579	6	0.21047	0.38769	0.990467	5771	1	0.4031	0.044057	0.12578	0.980801	1898	4	0.4031
FBgn0025687	6	0.71256	0.7757	0.992082	11892	1	0.53419	0.044057	0.12578	0.980801	1899	4	0.53419
FBgn0002932	7	0.74281	0.82297	0.993146	12170	1	0.21734	0.04411	0.13649	0.980801	1900	2	0.21734
FBgn0037849	6	0.23987	0.42689	0.990467	6349	2	0.13655	0.044122	0.12592	0.980801	1901	3	0.13655
FBgn0030964	6	0.97417	0.9742	0.999097	15201	0	0.33704	0.044138	0.12596	0.980801	1902	4	0.33704
FBgn0010391	6	0.43847	0.59769	0.991024	9079	1	0.23996	0.044223	0.12616	0.980801	1903	3	0.23996
FBgn0027567	4	0.95528	0.95505	0.999097	14920	0	0.70756	0.044273	0.10687	0.963101	1904	3	0.70756
FBgn0003377	5	0.77299	0.78291	0.992082	12463	1	-0.10083	0.044327	0.12236	0.978293	1905	2	-0.10083
FBgn0034902	6	0.45823	0.61351	0.991024	9310	2	0.05193	0.044427	0.1266	0.980801	1906	3	0.05193
FBgn0037512	6	0.46	0.61499	0.991024	9326	1	0.36284	0.044459	0.12669	0.980801	1907	4	0.36284
FBgn0263747	5	0.16081	0.31434	0.990467	4752	1	0.13896	0.04447	0.12263	0.978293	1908	2	0.13896
FBgn0037186	4	0.4544	0.5486	0.990867	9259	1	0.50011	0.044474	0.10725	0.963101	1909	2	0.50011
FBgn0267926	4	0.33833	0.4764	0.990562	7863	2	-0.24671	0.044474	0.10725	0.963101	1910	1	-0.24671
FBgn0267702	4	0.38529	0.51423	0.990562	8457	1	0.028693	0.044474	0.10725	0.963101	1911	1	0.028693
FBgn0265414	4	0.20848	0.33045	0.990467	5729	1	0.5453	0.044474	0.10725	0.963101	1912	2	0.5453
FBgn0264983	4	0.79005	0.78951	0.992082	12626	0	0.1016	0.044474	0.10725	0.963101	1913	2	0.1016
FBgn0265889	4	0.6569	0.67284	0.992082	11431	1	0.3028	0.044474	0.10725	0.963101	1914	2	0.3028
FBgn0031343	4	0.4814	0.56296	0.990867	9570	1	0.068685	0.044474	0.10725	0.963101	1915	2	0.068685
FBgn0033499	6	0.49143	0.64062	0.991024	9700	1	0.44512	0.044536	0.12685	0.980801	1916	4	0.44512
FBgn0267207	4	0.97017	0.96992	0.999097	15140	0	0.59377	0.044569	0.10745	0.963101	1917	3	0.59377
FBgn0037852	6	0.37088	0.5439	0.99062	8294	2	0.41641	0.044694	0.12723	0.980801	1918	3	0.41641
FBgn0260635	17	0.031267	0.13711	0.990467	1398	6	0.0049941	0.044695	0.18194	0.987618	1919	5	0.0049941
FBgn0026873	6	0.85197	0.85667	0.993146	13368	1	0.52102	0.044732	0.12732	0.980801	1920	3	0.52102
FBgn0030108	6	0.98399	0.98403	0.999097	15372	0	0.43961	0.044814	0.12751	0.980801	1921	4	0.43961
FBgn0260856	6	0.011326	0.043249	0.987	616	3	-0.21045	0.044831	0.12756	0.980801	1922	2	-0.21045
FBgn0039126	6	0.14268	0.29425	0.990467	4370	3	0.10479	0.044947	0.12782	0.980801	1923	3	0.10479
FBgn0038586	4	0.13835	0.25097	0.990467	4265	1	0.2744	0.04504	0.10843	0.963101	1924	3	0.2744
FBgn0022160	8	0.066026	0.19359	0.990467	2557	4	-0.15609	0.04506	0.14271	0.983154	1925	3	-0.15609
FBgn0036187	4	0.87156	0.87115	0.993146	13674	0	0.51558	0.045065	0.10848	0.963101	1926	3	0.51558
FBgn0266411	8	0.98314	0.98314	0.999097	15354	0	0.40056	0.045148	0.14295	0.983154	1927	4	0.40056
FBgn0028480	5	0.79263	0.79813	0.993146	12739	1	-0.094905	0.045155	0.12387	0.978293	1928	2	-0.094905
FBgn0004414	6	0.02829	0.087357	0.987	1277	3	-0.027626	0.045192	0.12837	0.980801	1929	2	-0.027626
FBgn0037270	6	0.2315	0.41573	0.990467	6184	3	-0.017893	0.045192	0.12837	0.980801	1930	3	-0.017893
FBgn0039167	6	0.3633	0.53808	0.990562	8197	1	0.17173	0.04523	0.12846	0.980801	1931	3	0.17173
FBgn0029895	6	0.96166	0.9617	0.999097	14999	0	0.25123	0.045271	0.12856	0.980801	1932	2	0.25123
FBgn0051463	6	0.10895	0.24598	0.990467	3667	3	0.19187	0.045271	0.12856	0.980801	1933	3	0.19187
FBgn0029939	8	0.15176	0.33894	0.990467	4561	4	-0.056545	0.045286	0.1433	0.983154	1934	3	-0.056545
FBgn0085413	6	0.88804	0.88789	0.993146	13897	1	0.5122	0.045308	0.12865	0.980801	1935	4	0.5122
FBgn0261854	11	0.013707	0.061164	0.987	726	1	0.31126	0.045342	0.15892	0.987618	1936	6	0.31126
FBgn0027835	6	0.38325	0.55362	0.990867	8436	2	0.15776	0.045354	0.12875	0.980801	1937	3	0.15776
FBgn0035132	8	0.22498	0.44366	0.990467	6047	3	0.32319	0.045381	0.14354	0.983154	1938	4	0.32319
FBgn0036668	4	0.84429	0.84379	0.993146	13289	0	0.39138	0.045424	0.10918	0.963101	1939	2	0.39138
FBgn0032429	6	0.55462	0.69377	0.992082	10477	2	0.23659	0.045432	0.12891	0.980801	1940	3	0.23659
FBgn0035107	6	0.43926	0.59831	0.991024	9088	1	-0.094821	0.045495	0.12907	0.980801	1941	2	-0.094821
FBgn0028993	6	0.97747	0.97756	0.999097	15270	0	0.36906	0.045578	0.12927	0.980801	1942	4	0.36906
FBgn0028427	6	0.98023	0.98027	0.999097	15315	0	0.44496	0.045635	0.1294	0.980801	1943	3	0.44496
FBgn0261862	6	0.2502	0.44058	0.990467	6554	2	0.36668	0.045638	0.12941	0.980801	1944	4	0.36668
FBgn0265593	4	0.95618	0.95597	0.999097	14932	0	0.55777	0.045647	0.10961	0.963101	1945	3	0.55777
FBgn0039149	4	0.93574	0.93544	0.999097	14630	0	0.62059	0.045647	0.10961	0.963101	1946	2	0.62059
FBgn0265306	4	0.13767	0.25018	0.990467	4257	1	0.406	0.045668	0.10965	0.963101	1947	2	0.406
FBgn0036362	6	0.95988	0.95991	0.999097	14985	0	0.43421	0.045689	0.12953	0.980801	1948	4	0.43421
FBgn0030200	4	0.85778	0.85743	0.993146	13462	0	0.42241	0.045699	0.10971	0.963101	1949	3	0.42241
FBgn0031324	6	0.57074	0.70766	0.992082	10652	2	0.034797	0.045706	0.12958	0.980801	1950	1	0.034797
FBgn0036480	6	0.34199	0.52153	0.990562	7914	1	0.22866	0.045775	0.12972	0.980801	1951	2	0.22866
FBgn0038945	6	0.25093	0.44154	0.990467	6563	1	0.097915	0.045787	0.12975	0.980801	1952	2	0.097915
FBgn0035286	6	0.92255	0.9223	0.99903	14433	0	0.521	0.045799	0.12978	0.980801	1953	4	0.521
FBgn0267224	4	0.38717	0.51516	0.990562	8480	1	-0.068981	0.045805	0.10994	0.963457	1954	1	-0.068981
FBgn0014411	6	0.97309	0.97314	0.999097	15189	0	0.13348	0.045844	0.12987	0.980801	1955	1	0.13348
FBgn0032293	6	0.31972	0.50431	0.990562	7602	2	0.4197	0.045882	0.12997	0.980801	1956	4	0.4197
FBgn0004370	6	0.97526	0.97533	0.999097	15227	0	0.23878	0.045887	0.12998	0.980801	1957	2	0.23878
FBgn0031492	6	0.9272	0.92701	0.999097	14508	0	0.40736	0.045887	0.12998	0.980801	1958	3	0.40736
FBgn0053483	6	0.48852	0.6382	0.991024	9658	2	0.35221	0.04591	0.13006	0.980801	1959	4	0.35221
FBgn0031804	5	0.019604	0.061517	0.987	948	1	0.1476	0.045926	0.12527	0.980801	1960	2	0.1476
FBgn0034837	6	0.77082	0.80437	0.993146	12447	1	0.23324	0.045981	0.13022	0.980801	1961	3	0.23324
FBgn0038294	10	0.82851	0.90803	0.996331	13091	1	0.35709	0.045988	0.15764	0.987618	1962	6	0.35709
FBgn0019949	6	0.81039	0.82762	0.993146	12874	1	0.47502	0.046007	0.13028	0.980801	1963	4	0.47502
FBgn0265738	4	0.65317	0.67003	0.991846	11407	1	0.57135	0.046073	0.1105	0.965173	1964	3	0.57135
FBgn0036641	6	0.4497	0.60661	0.991024	9216	2	0.32056	0.046107	0.13048	0.980801	1965	4	0.32056
FBgn0032590	6	0.058609	0.15834	0.990467	2306	3	-0.47272	0.046118	0.1305	0.980801	1966	1	-0.47272
FBgn0030156	6	0.44699	0.60439	0.991024	9176	2	-0.080199	0.046118	0.1305	0.980801	1967	1	-0.080199
FBgn0053970	6	0.21862	0.39867	0.990467	5949	3	-0.25377	0.046118	0.1305	0.980801	1968	1	-0.25377
FBgn0039116	6	0.69887	0.76975	0.992082	11783	1	0.18482	0.046121	0.13051	0.980801	1969	3	0.18482
FBgn0031384	8	0.97524	0.97538	0.999097	15225	0	0.2833	0.04614	0.1455	0.983154	1970	4	0.2833
FBgn0030505	8	0.13841	0.31748	0.990467	4267	4	-0.082479	0.046199	0.14565	0.983154	1971	2	-0.082479
FBgn0035264	6	0.95731	0.95725	0.999097	14950	0	0.443	0.046255	0.13084	0.980801	1972	3	0.443
FBgn0004427	6	0.087414	0.21431	0.990467	3182	2	0.47474	0.046312	0.13095	0.980801	1973	4	0.47474
FBgn0050414	6	0.16109	0.32011	0.990467	4758	1	0.55335	0.046324	0.13097	0.980801	1974	4	0.55335
FBgn0032100	6	0.48852	0.6382	0.991024	9659	2	0.55801	0.046333	0.13099	0.980801	1975	3	0.55801
FBgn0040747	6	0.45748	0.61289	0.991024	9305	1	0.42058	0.046333	0.13099	0.980801	1976	3	0.42058
FBgn0033993	6	0.93856	0.93847	0.999097	14673	0	0.53311	0.046333	0.13099	0.980801	1977	3	0.53311
FBgn0265634	4	0.47723	0.56077	0.990867	9517	1	0.41512	0.04636	0.11105	0.965173	1978	3	0.41512
FBgn0265974	6	0.98937	0.98939	0.999097	15469	0	0.34141	0.046369	0.13108	0.980801	1979	4	0.34141
FBgn0032744	4	0.12102	0.23114	0.990467	3901	2	-0.25876	0.046402	0.11113	0.965173	1980	1	-0.25876
FBgn0266874	4	0.84429	0.84379	0.993146	13288	0	0.24398	0.046448	0.11121	0.965173	1981	2	0.24398
FBgn0010350	6	0.086423	0.21282	0.990467	3157	1	0.18805	0.046461	0.13129	0.980801	1982	1	0.18805
FBgn0085231	6	0.63406	0.74403	0.992082	11257	1	0.041752	0.046481	0.13133	0.980801	1983	2	0.041752
FBgn0034196	6	0.83621	0.8451	0.993146	13195	1	0.43103	0.046557	0.13151	0.980801	1984	4	0.43103
FBgn0261445	6	0.9038	0.90356	0.993146	14093	0	0.28103	0.046591	0.1316	0.980801	1985	3	0.28103
FBgn0000473	6	0.60073	0.73214	0.992082	10995	1	0.32877	0.046615	0.13165	0.980801	1986	3	0.32877
FBgn0053690	6	0.23158	0.41585	0.990467	6187	2	0.061861	0.046659	0.13175	0.980801	1987	3	0.061861
FBgn0031997	6	0.010119	0.038949	0.987	562	2	-0.10797	0.046666	0.13176	0.980801	1988	1	-0.10797
FBgn0031751	6	0.94126	0.94116	0.999097	14713	0	0.35591	0.046672	0.13177	0.980801	1989	4	0.35591
FBgn0032218	4	0.97723	0.97717	0.999097	15265	0	0.54084	0.046687	0.1117	0.966722	1990	3	0.54084
FBgn0029750	6	0.72421	0.78101	0.992082	12006	1	0.098187	0.046735	0.13192	0.980801	1991	3	0.098187
FBgn0264491	6	0.096855	0.22836	0.990467	3391	1	0.3253	0.046759	0.13196	0.980801	1992	4	0.3253
FBgn0035793	6	0.49224	0.64131	0.991024	9715	2	-0.12743	0.046803	0.13205	0.980801	1993	2	-0.12743
FBgn0041604	2	0.70311	0.70278	0.992082	11817	0	1.018	0.046813	0.083758	0.954554	1994	1	1.018
FBgn0038498	6	0.85413	0.85835	0.993146	13410	1	0.42681	0.046886	0.13224	0.980801	1995	4	0.42681
FBgn0030512	6	0.042169	0.12058	0.990467	1781	3	-0.39143	0.046906	0.13229	0.980801	1996	1	-0.39143
FBgn0044048	6	0.33839	0.51879	0.990562	7864	2	0.20466	0.046969	0.13242	0.980801	1997	3	0.20466
FBgn0038862	6	0.39174	0.5604	0.990867	8536	2	0.075574	0.047009	0.13251	0.980801	1998	1	0.075574
FBgn0028534	6	0.016747	0.058279	0.987	838	1	0.36048	0.047049	0.13258	0.980801	1999	4	0.36048
[truncated: 13,628 more rows]

## Sheet: 2B rep2
id	num	neg|score	neg|p-value	neg|fdr	neg|rank	neg|goodsgrna	neg|lfc	pos|score	pos|p-value	pos|fdr	pos|rank	pos|goodsgrna	pos|lfc
FBgn0033913	6	1	1	1	15627	0	2.7454	3.5047e-14	3.1679e-07	0.00495	1	6	2.7454
FBgn0262160	6	0.96779	0.96787	0.998471	15145	0	0.95812	9.7879e-07	4.1183e-06	0.024752	2	3	0.95812
FBgn0038353	6	0.99986	0.99987	1	15623	0	1.5087	1.0406e-06	4.7519e-06	0.024752	3	6	1.5087
FBgn0027348	6	1	1	1	15626	0	1.3034	1.3649e-06	7.9198e-06	0.030941	4	6	1.3034
FBgn0265453	4	0.82128	0.82077	0.989455	13014	0	1.1163	1.7657e-05	6.7477e-05	0.197195	5	3	1.1163
FBgn0266929	4	0.71695	0.71941	0.989455	11866	1	0.87314	1.9152e-05	7.5713e-05	0.197195	6	2	0.87314
FBgn0003450	4	0.42357	0.52756	0.988564	8776	1	0.21619	2.377e-05	9.2186e-05	0.205799	7	2	0.21619
FBgn0261552	14	0.3462	0.63541	0.988564	7987	4	0.67891	3.8067e-05	0.00034055	0.469059	8	9	0.67891
FBgn0262485	6	0.40551	0.56814	0.988564	8615	1	1.0097	4.0712e-05	0.00021573	0.410891	9	5	1.0097
FBgn0085488	6	0.39456	0.55928	0.988564	8514	2	0.46231	4.4992e-05	0.00023664	0.410891	10	3	0.46231
FBgn0030161	6	0.99994	0.99994	1	15625	0	1.5112	6.0716e-05	0.00031394	0.469059	11	6	1.5112
FBgn0262486	6	0.84905	0.85317	0.989455	13356	1	1.0382	6.7364e-05	0.00036019	0.469059	12	5	1.0382
FBgn0000489	6	0.29562	0.48118	0.988564	7251	2	-0.075495	0.00010696	0.00057498	0.59901	13	2	-0.075495
FBgn0015754	8	0.050614	0.15611	0.967275	2085	2	0.65429	0.000111	0.00078596	0.657733	14	4	0.65429
FBgn0028940	3	0.99987	0.99987	1	15624	0	1.0814	0.00012662	0.00039631	0.47639	15	3	1.0814
FBgn0005616	6	0.99985	0.99987	1	15622	0	0.76635	0.00014525	0.00078216	0.657733	16	6	0.76635
FBgn0264265	4	0.99985	0.99985	1	15621	0	1.2083	0.00014577	0.00054203	0.59901	17	4	1.2083
FBgn0262167	6	0.2564	0.44851	0.986685	6721	2	0.59954	0.00016425	0.00090571	0.657733	18	4	0.59954
FBgn0260431	6	0.52079	0.66377	0.988564	9905	2	0.8159	0.00017596	0.0009716	0.657733	19	4	0.8159
FBgn0029529	4	0.95278	0.95257	0.998342	14889	0	1.3534	0.00017955	0.00066178	0.646349	20	3	1.3534
FBgn0259678	6	0.30692	0.48989	0.988564	7418	1	0.85318	0.0001833	0.0010178	0.657733	21	3	0.85318
FBgn0036576	6	0.020901	0.068316	0.950637	1045	4	-0.50708	0.00018577	0.0010318	0.657733	22	2	-0.50708
FBgn0033692	6	0.69066	0.76153	0.989455	11612	1	0.69344	0.00018849	0.0010451	0.657733	23	5	0.69344
FBgn0031505	6	0.93049	0.93034	0.998342	14531	0	0.90243	0.00019459	0.0010812	0.657733	24	4	0.90243
FBgn0263078	6	0.91824	0.91791	0.998342	14364	0	0.66662	0.0002224	0.0012206	0.657733	25	4	0.66662
FBgn0039802	5	0.90324	0.90351	0.998342	14139	0	0.22914	0.00024612	0.0011161	0.657733	26	3	0.22914
FBgn0041240	6	0.83694	0.84398	0.989455	13191	1	0.41718	0.00029523	0.0016156	0.750138	27	4	0.41718
FBgn0028949	6	0.38354	0.55032	0.988564	8373	2	0.81956	0.00029653	0.0016248	0.750138	28	4	0.81956
FBgn0261938	6	0.078557	0.19827	0.979758	2978	1	1.1273	0.00030447	0.0016711	0.750138	29	4	1.1273
FBgn0003317	4	0.03015	0.07655	0.950637	1413	1	0.60182	0.00030898	0.0011053	0.657733	30	3	0.60182
FBgn0085313	6	0.99161	0.99164	0.999085	15505	0	0.71338	0.00031098	0.0017034	0.750138	31	5	0.71338
FBgn0037275	6	0.99427	0.99429	0.999085	15549	0	0.77434	0.00031536	0.0017281	0.750138	32	5	0.77434
FBgn0267745	4	0.71156	0.71471	0.989455	11809	1	1.0884	0.00032313	0.0011528	0.657733	33	2	1.0884
FBgn0036843	4	0.99948	0.99948	1	15617	0	0.89685	0.00032937	0.00118	0.657733	34	4	0.89685
FBgn0265177	6	0.77602	0.804	0.989455	12476	1	1.2778	0.00036361	0.0019847	0.811247	35	5	1.2778
FBgn0064227	6	0.30229	0.48628	0.988564	7335	2	0.83333	0.00036491	0.0019898	0.811247	36	4	0.83333
FBgn0004390	6	0.87515	0.8755	0.989455	13740	1	0.73485	0.00038086	0.0020778	0.811757	37	5	0.73485
FBgn0001168	6	0.39078	0.55625	0.988564	8466	2	0.85572	0.00039888	0.0021665	0.825767	38	4	0.85572
FBgn0265798	4	0.98734	0.98734	0.999085	15427	0	1.3715	0.00040404	0.0014424	0.729639	39	3	1.3715
FBgn0052445	6	0.15274	0.30684	0.979758	4636	2	0.48714	0.00041002	0.0022255	0.828029	40	3	0.48714
FBgn0010109	6	0.99956	0.99958	1	15619	0	0.3552	0.00044082	0.0023788	0.864495	41	6	0.3552
FBgn0037756	6	0.090054	0.21564	0.979758	3241	1	0.72824	0.00048098	0.002572	0.874327	42	4	0.72824
FBgn0031327	6	0.98833	0.98833	0.999085	15444	0	0.42092	0.00049181	0.0026297	0.874327	43	3	0.42092
FBgn0264562	6	0.6544	0.74631	0.989455	11332	1	0.14889	0.00053472	0.0028413	0.874327	44	1	0.14889
FBgn0003525	6	0.97895	0.97899	0.999085	15296	0	0.55569	0.00054243	0.0028818	0.874327	45	3	0.55569
FBgn0035334	4	0.75019	0.74998	0.989455	12110	1	1.3204	0.00056154	0.0020246	0.811247	46	3	1.3204
FBgn0037579	6	0.95535	0.95531	0.998342	14944	0	0.79326	0.000569	0.0030263	0.874327	47	5	0.79326
FBgn0052103	8	0.67304	0.79801	0.989455	11475	2	0.4493	0.00057957	0.0034445	0.897926	48	5	0.4493
FBgn0000964	6	0.064278	0.17088	0.967275	2464	1	1.4369	0.0005885	0.0031156	0.874327	49	5	1.4369
FBgn0053124	6	0.20501	0.37961	0.979758	5678	1	1.0341	0.00059987	0.0031891	0.874327	50	4	1.0341
FBgn0031265	5	0.47061	0.61497	0.988564	9322	1	0.58242	0.0006213	0.0028223	0.874327	51	4	0.58242
FBgn0039801	6	0.9938	0.9938	0.999085	15542	0	0.5477	0.00063892	0.0033925	0.897926	52	5	0.5477
FBgn0040850	6	0.69066	0.76153	0.989455	11613	1	0.39014	0.00067727	0.0035813	0.897926	53	3	0.39014
FBgn0033134	6	0.99932	0.99934	1	15616	0	0.54042	0.0006842	0.0036136	0.897926	54	6	0.54042
FBgn0035838	6	0.36368	0.5345	0.988564	8175	2	0.95888	0.00068587	0.00362	0.897926	55	4	0.95888
FBgn0265379	4	0.78333	0.78277	0.989455	12568	0	1.5276	0.00068917	0.0024694	0.874327	56	3	1.5276
FBgn0028583	6	0.61968	0.73288	0.989455	11022	1	0.43677	0.00070317	0.0037036	0.904316	57	3	0.43677
FBgn0031489	4	0.99927	0.99926	1	15614	0	0.80454	0.00072704	0.0026031	0.874327	58	4	0.80454
FBgn0038366	6	0.62724	0.73573	0.989455	11076	1	0.4591	0.00073978	0.0038804	0.905868	59	3	0.4591
FBgn0033979	6	0.32017	0.50007	0.988564	7576	2	0.04999	0.00074854	0.0039247	0.905868	60	3	0.04999
FBgn0036039	6	0.43891	0.59544	0.988564	8937	1	0.70921	0.00075212	0.0039418	0.905868	61	4	0.70921
FBgn0001276	2	0.98404	0.98392	0.999085	15375	0	1.8866	0.00077239	0.0014474	0.729639	62	2	1.8866
FBgn0053218	4	0.7064	0.71028	0.989455	11764	1	-0.041896	0.00078419	0.0028014	0.874327	63	1	-0.041896
FBgn0050018	6	0.76751	0.79923	0.989455	12394	1	0.99074	0.00080746	0.0042288	0.928287	64	5	0.99074
FBgn0086779	4	0.073631	0.16478	0.967275	2810	2	0.28843	0.00081853	0.0029262	0.874327	65	2	0.28843
FBgn0264693	6	0.16035	0.31767	0.979758	4805	3	-0.16589	0.0008198	0.004277	0.928287	66	2	-0.16589
FBgn0036143	6	0.91105	0.91077	0.998342	14250	0	0.64108	0.00090249	0.0046724	0.973531	67	4	0.64108
FBgn0263246	6	0.99721	0.99718	0.999157	15595	0	0.84629	0.00096649	0.0049841	0.992403	68	5	0.84629
FBgn0032094	6	0.84662	0.85125	0.989455	13321	1	0.64628	0.0010537	0.0054003	0.992403	69	5	0.64628
FBgn0266936	4	0.58148	0.61797	0.988564	10721	1	1.2568	0.0010634	0.0038062	0.905868	70	3	1.2568
FBgn0029730	6	0.48618	0.63451	0.988564	9499	2	0.43626	0.0010721	0.0054688	0.992403	71	4	0.43626
FBgn0036005	6	0.44623	0.6013	0.988564	9027	2	0.33525	0.001081	0.0055036	0.992403	72	3	0.33525
FBgn0033929	6	0.45684	0.6101	0.988564	9146	1	-0.1005	0.0011198	0.0056544	0.992403	73	2	-0.1005
FBgn0033133	6	0.67988	0.75686	0.989455	11538	1	0.15349	0.0011198	0.0056544	0.992403	74	2	0.15349
FBgn0035761	4	0.50895	0.57376	0.988564	9763	1	0.87608	0.0011405	0.0040952	0.927464	75	3	0.87608
FBgn0037822	4	0.75019	0.74998	0.989455	12193	1	1.0924	0.0011714	0.0042149	0.928287	76	3	1.0924
FBgn0043534	6	0.97595	0.976	0.999085	15261	0	0.50204	0.0011965	0.0059661	0.992403	77	5	0.50204
FBgn0028481	6	0.56464	0.70191	0.988564	10511	2	0.67119	0.0012013	0.0059858	0.992403	78	4	0.67119
FBgn0030417	6	0.34773	0.52181	0.988564	8009	1	0.84975	0.0012041	0.0059965	0.992403	79	5	0.84975
FBgn0034796	6	0.73203	0.78059	0.989455	12001	1	0.052771	0.0012244	0.0060764	0.992403	80	2	0.052771
FBgn0265038	3	0.83877	0.83848	0.989455	13222	0	1.0303	0.001233	0.0035503	0.897926	81	2	1.0303
FBgn0031650	6	0.23121	0.41493	0.979758	6136	1	0.40047	0.0012473	0.0061727	0.992403	82	4	0.40047
FBgn0265797	4	0.15198	0.26412	0.979758	4622	2	0.19682	0.0012592	0.0045298	0.969687	83	2	0.19682
FBgn0267017	4	0.99865	0.99863	0.99959	15612	0	0.91388	0.0012849	0.0046204	0.973531	84	4	0.91388
FBgn0010651	7	0.99931	0.99931	1	15615	0	1.0283	0.0012875	0.00662	0.992403	85	6	1.0283
FBgn0025687	6	0.60694	0.72823	0.989455	10912	1	0.86453	0.0013004	0.0063767	0.992403	86	4	0.86453
FBgn0266893	4	0.86116	0.86082	0.989455	13499	0	1.1167	0.0013305	0.0047813	0.983129	87	3	1.1167
FBgn0035264	6	0.75633	0.7931	0.989455	12305	1	0.75332	0.0013671	0.0066466	0.992403	88	4	0.75332
FBgn0035612	6	0.16478	0.32381	0.979758	4903	1	0.58843	0.001384	0.00671	0.992403	89	3	0.58843
FBgn0034579	6	0.96726	0.9673	0.998417	15137	0	0.70715	0.001387	0.0067226	0.992403	90	5	0.70715
FBgn0034683	6	0.17519	0.33853	0.979758	5094	2	-0.1283	0.0013898	0.0067347	0.992403	91	1	-0.1283
FBgn0264440	4	0.8301	0.82955	0.989455	13123	0	0.88064	0.001403	0.0050243	0.992403	92	2	0.88064
FBgn0034994	6	0.99813	0.99807	0.999348	15606	0	0.64046	0.0014192	0.0068607	0.992403	93	5	0.64046
FBgn0267282	4	0.78126	0.78065	0.989455	12539	0	-0.24914	0.0014492	0.0051919	0.992403	94	1	-0.24914
FBgn0001142	6	0.70533	0.76795	0.989455	11751	1	0.95618	0.0014509	0.006996	0.992403	95	4	0.95618
FBgn0038814	6	0.97584	0.97591	0.999085	15260	0	0.62501	0.001461	0.0070337	0.992403	96	4	0.62501
FBgn0038160	6	0.7998	0.81841	0.989455	12762	1	0.81775	0.0014797	0.0071186	0.992403	97	5	0.81775
FBgn0034335	6	0.98936	0.98937	0.999085	15460	0	0.97799	0.0014807	0.007123	0.992403	98	5	0.97799
FBgn0029709	6	0.040267	0.11567	0.967275	1761	2	1.1162	0.0015413	0.0073606	0.992403	99	4	1.1162
FBgn0267428	6	0.87515	0.8755	0.989455	13698	1	0.73286	0.0015508	0.007398	0.992403	100	5	0.73286
FBgn0262995	4	0.99841	0.9984	0.999421	15611	0	0.97616	0.0015912	0.0056975	0.992403	101	4	0.97616
FBgn0267623	4	0.9719	0.97165	0.998526	15207	0	1.0927	0.0015917	0.0056988	0.992403	102	3	1.0927
FBgn0000042	6	0.24289	0.43067	0.979758	6427	3	-0.31952	0.0016034	0.0075982	0.992403	103	1	-0.31952
FBgn0033844	6	0.10763	0.24184	0.979758	3637	2	0.070648	0.0016064	0.0076103	0.992403	104	3	0.070648
FBgn0036170	2	0.42735	0.43079	0.979758	8812	1	0.89862	0.0016514	0.0031714	0.874327	105	1	0.89862
FBgn0261997	6	0.3498	0.52342	0.988564	8034	2	0.52294	0.0016676	0.0078479	0.992403	106	3	0.52294
FBgn0035878	4	0.95963	0.95942	0.998342	15010	0	0.70223	0.0016969	0.0060681	0.992403	107	3	0.70223
FBgn0029839	6	0.73601	0.7826	0.989455	12026	1	0.37011	0.0016973	0.0079581	0.992403	108	3	0.37011
FBgn0085736	6	0.30446	0.48793	0.988564	7375	2	0.22146	0.0017103	0.0079999	0.992403	109	3	0.22146
FBgn0044811	6	0.99644	0.99642	0.999157	15580	0	0.84721	0.0017303	0.0080722	0.992403	110	5	0.84721
FBgn0035915	6	0.85642	0.85909	0.989455	13462	1	0.72408	0.0017386	0.0081019	0.992403	111	5	0.72408
FBgn0033244	4	0.99826	0.99826	0.999348	15608	0	0.87981	0.0017407	0.0062316	0.992403	112	4	0.87981
FBgn0051739	6	0.57943	0.71498	0.989455	10698	1	0.034615	0.0018058	0.0083731	0.992403	113	3	0.034615
FBgn0033247	6	0.092876	0.21987	0.979758	3295	2	0.54061	0.001811	0.0083972	0.992403	114	4	0.54061
FBgn0265315	4	0.6916	0.69795	0.988564	11622	1	1.5427	0.0018143	0.0064939	0.992403	115	3	1.5427
FBgn0031302	5	0.91406	0.91428	0.998342	14299	0	0.11611	0.0018705	0.0082242	0.992403	116	2	0.11611
FBgn0039124	6	0.99081	0.99084	0.999085	15490	0	0.73364	0.001878	0.0086582	0.992403	117	3	0.73364
FBgn0036394	6	0.98095	0.98097	0.999085	15339	0	0.79598	0.001881	0.0086722	0.992403	118	5	0.79598
FBgn0033354	6	0.98981	0.98984	0.999085	15471	0	0.54938	0.0019487	0.008956	0.992403	119	4	0.54938
FBgn0050222	6	0.69066	0.76153	0.989455	11615	1	0.18084	0.0019951	0.0091524	0.992403	120	3	0.18084
FBgn0039194	6	0.56118	0.69888	0.988564	10241	1	0.42983	0.002006	0.009198	0.992403	121	3	0.42983
FBgn0263868	4	0.8639	0.86356	0.989455	13513	0	0.39651	0.002019	0.0072162	0.992403	122	2	0.39651
FBgn0035512	5	0.99798	0.99797	0.999348	15603	0	0.67723	0.0020221	0.0088508	0.992403	123	5	0.67723
FBgn0003507	4	0.92986	0.92947	0.998342	14524	0	0.90306	0.0020375	0.0072789	0.992403	124	2	0.90306
FBgn0032151	6	0.33878	0.51482	0.988564	7911	1	-0.069917	0.0021018	0.0095611	0.992403	125	2	-0.069917
FBgn0029957	4	0.71069	0.714	0.989455	11802	1	0.17799	0.0021139	0.0075558	0.992403	126	2	0.17799
FBgn0263605	6	0.92528	0.92511	0.998342	14464	0	0.48829	0.0021458	0.0097366	0.992403	127	4	0.48829
FBgn0040234	6	0.87515	0.8755	0.989455	13636	1	0.76886	0.0021529	0.0097695	0.992403	128	4	0.76886
FBgn0051840	4	0.81221	0.81174	0.989455	12915	0	0.83565	0.0021782	0.0077877	0.992403	129	3	0.83565
FBgn0025620	6	0.84819	0.85248	0.989455	13344	1	0.26829	0.0022026	0.0099659	0.992403	130	3	0.26829
FBgn0002872	5	0.37193	0.51824	0.988564	8243	2	0.074789	0.0022265	0.0097093	0.992403	131	2	0.074789
FBgn0032956	6	0.99131	0.99132	0.999085	15500	0	0.56836	0.0022475	0.01014	0.992403	132	5	0.56836
FBgn0027491	6	0.22868	0.41152	0.979758	6105	1	0.5032	0.0022824	0.01028	0.992403	133	3	0.5032
FBgn0038832	6	0.061609	0.16489	0.967275	2402	1	0.72689	0.0022915	0.010314	0.992403	134	4	0.72689
FBgn0031094	6	0.9921	0.99214	0.999085	15511	0	0.84676	0.0022915	0.010314	0.992403	135	5	0.84676
FBgn0069056	6	0.92921	0.92905	0.998342	14515	0	0.76038	0.0022915	0.010314	0.992403	136	4	0.76038
FBgn0039415	6	0.97604	0.97609	0.999085	15264	0	0.49407	0.0023019	0.010349	0.992403	137	5	0.49407
FBgn0037419	6	0.75092	0.79027	0.989455	12257	1	0.91315	0.00234	0.010484	0.992403	138	5	0.91315
FBgn0029890	6	0.69189	0.76204	0.989455	11624	1	0.091053	0.0023556	0.010555	0.992403	139	3	0.091053
FBgn0034753	6	0.73158	0.78037	0.989455	11996	1	1.0055	0.0024164	0.0108	0.992403	140	4	1.0055
FBgn0000337	6	0.48116	0.63023	0.988564	9443	1	0.22649	0.0024577	0.010979	0.992403	141	3	0.22649
FBgn0034008	6	0.26519	0.45775	0.986685	6840	1	0.39589	0.0024935	0.011123	0.992403	142	3	0.39589
FBgn0040253	6	0.51499	0.65883	0.988564	9830	1	0.37962	0.0025289	0.011262	0.992403	143	3	0.37962
FBgn0085241	2	0.99744	0.99738	0.999157	15599	0	1.0853	0.0025569	0.004934	0.992403	144	2	1.0853
FBgn0086371	4	0.99743	0.99743	0.999157	15598	0	0.48339	0.0025721	0.0091359	0.992403	145	4	0.48339
FBgn0039151	6	0.99519	0.99522	0.999085	15565	0	0.67444	0.0025799	0.011471	0.992403	146	5	0.67444
FBgn0027949	5	0.24615	0.39818	0.979758	6583	1	1.0077	0.0026612	0.011564	0.992403	147	3	1.0077
FBgn0035587	6	0.54518	0.685	0.988564	10131	1	-0.10539	0.0026712	0.011839	0.992403	148	2	-0.10539
FBgn0029170	6	0.90227	0.90204	0.998342	14122	0	0.39634	0.0026712	0.011839	0.992403	149	5	0.39634
FBgn0039177	6	0.81329	0.82716	0.989455	12922	1	0.73525	0.0026809	0.011879	0.992403	150	4	0.73525
FBgn0034330	6	0.90403	0.90376	0.998342	14154	0	0.22191	0.002697	0.011942	0.992403	151	2	0.22191
FBgn0026370	6	0.90403	0.90376	0.998342	14153	0	0.54586	0.0027433	0.012136	0.992403	152	3	0.54586
FBgn0053198	6	0.024002	0.076103	0.950637	1165	1	0.85707	0.0027444	0.01214	0.992403	153	3	0.85707
FBgn0266021	4	0.81051	0.81001	0.989455	12885	0	0.51023	0.0027582	0.0097657	0.992403	154	2	0.51023
FBgn0267337	6	0.0032403	0.013862	0.914045	226	1	0.47966	0.0027914	0.012325	0.992403	155	5	0.47966
FBgn0038001	3	0.9972	0.99722	0.999157	15593	0	0.75163	0.0028015	0.0078567	0.992403	156	3	0.75163
FBgn0262856	6	0.95064	0.9505	0.998342	14857	0	0.55967	0.0028339	0.012472	0.992403	157	5	0.55967
FBgn0040363	6	0.56464	0.70191	0.988564	10342	2	0.3943	0.0028379	0.012484	0.992403	158	3	0.3943
FBgn0002631	6	0.98053	0.98056	0.999085	15331	0	0.6436	0.0028442	0.012507	0.992403	159	5	0.6436
FBgn0010473	6	0.24289	0.43067	0.979758	6360	3	0.22472	0.0028846	0.012653	0.992403	160	3	0.22472
FBgn0039936	5	0.99711	0.9971	0.999157	15592	0	0.52358	0.0028928	0.0125	0.992403	161	5	0.52358
FBgn0086690	9	0.065112	0.19291	0.979758	2601	2	0.12086	0.002897	0.01534	0.992403	162	4	0.12086
FBgn0032596	4	0.99704	0.99703	0.999157	15591	0	0.53642	0.0029553	0.01047	0.992403	163	4	0.53642
FBgn0036198	6	0.94403	0.94385	0.998342	14739	0	0.90588	0.0030049	0.013135	0.992403	164	5	0.90588
FBgn0031606	6	0.35903	0.53076	0.988564	8121	2	0.25986	0.0030216	0.013197	0.992403	165	3	0.25986
FBgn0050359	6	0.0057978	0.023502	0.926279	355	2	0.22859	0.0030532	0.013323	0.992403	166	3	0.22859
FBgn0264368	4	0.96955	0.9693	0.998471	15167	0	0.98025	0.003058	0.010817	0.992403	167	3	0.98025
FBgn0034783	6	0.90718	0.90685	0.998342	14199	0	0.72724	0.0030673	0.013375	0.992403	168	3	0.72724
FBgn0085477	6	0.93288	0.9327	0.998342	14570	0	0.63272	0.0030964	0.013495	0.992403	169	4	0.63272
FBgn0039698	6	0.85534	0.8582	0.989455	13449	1	0.42056	0.003098	0.0135	0.992403	170	4	0.42056
FBgn0053099	6	0.99285	0.99288	0.999085	15526	0	0.68551	0.0031318	0.013628	0.992403	171	5	0.68551
FBgn0266886	1	0.99686	0.99695	0.999157	15588	0	1.932	0.0031436	0.0031144	0.874327	172	1	1.932
FBgn0266912	4	0.99685	0.99684	0.999157	15587	0	0.67519	0.0031463	0.011118	0.992403	173	4	0.67519
FBgn0019952	6	0.82403	0.8345	0.989455	13061	1	0.7603	0.0031562	0.013716	0.992403	174	4	0.7603
FBgn0020887	6	0.67327	0.75409	0.989455	11476	1	0.80821	0.0032349	0.014025	0.992403	175	3	0.80821
FBgn0004066	6	0.1102	0.2456	0.979758	3689	1	-0.1457	0.0032403	0.014039	0.992403	176	1	-0.1457
FBgn0031110	6	0.95392	0.95386	0.998342	14909	0	0.52702	0.0032597	0.014119	0.992403	177	5	0.52702
FBgn0040653	6	0.83694	0.84398	0.989455	13195	1	0.82865	0.0032646	0.014137	0.992403	178	4	0.82865
FBgn0037138	6	0.069024	0.18137	0.975962	2698	1	0.62016	0.0032668	0.014145	0.992403	179	4	0.62016
FBgn0266549	4	0.9967	0.9967	0.999157	15584	0	0.46531	0.0033003	0.011649	0.992403	180	4	0.46531
FBgn0037420	6	0.24081	0.42783	0.979758	6286	1	0.4819	0.00331	0.014326	0.992403	181	3	0.4819
FBgn0053454	6	0.014107	0.050758	0.950637	759	3	-0.52435	0.0033114	0.014333	0.992403	182	2	-0.52435
FBgn0031178	6	0.97748	0.97757	0.999085	15284	0	0.70153	0.0033515	0.014484	0.992403	183	4	0.70153
FBgn0051997	6	0.90227	0.90204	0.998342	14121	0	0.61479	0.0033542	0.014495	0.992403	184	5	0.61479
FBgn0038158	6	0.98738	0.98739	0.999085	15430	0	0.59763	0.0033604	0.014523	0.992403	185	5	0.59763
FBgn0037685	6	0.96194	0.96199	0.998342	15047	0	0.76766	0.0033604	0.014523	0.992403	186	4	0.76766
FBgn0011586	4	0.99662	0.99664	0.999157	15582	0	0.55293	0.0033779	0.011896	0.992403	187	4	0.55293
FBgn0085312	6	0.31541	0.49638	0.988564	7512	2	-0.063938	0.0033825	0.01462	0.992403	188	1	-0.063938
FBgn0039045	6	0.74385	0.78657	0.989455	12069	1	0.64706	0.0034075	0.014699	0.992403	189	3	0.64706
FBgn0053263	6	0.19344	0.36375	0.979758	5454	2	0.66067	0.0034162	0.014738	0.992403	190	4	0.66067
FBgn0035155	6	0.95611	0.95608	0.998342	14960	0	0.45384	0.0034444	0.014846	0.992403	191	3	0.45384
FBgn0261387	6	0.99205	0.99209	0.999085	15509	0	0.49678	0.0034719	0.014947	0.992403	192	5	0.49678
FBgn0044323	6	0.30623	0.48934	0.988564	7404	1	0.047293	0.0034892	0.015017	0.992403	193	2	0.047293
FBgn0035855	6	0.93459	0.93444	0.998342	14603	0	0.23975	0.0034892	0.015017	0.992403	194	3	0.23975
FBgn0036311	6	0.95347	0.95341	0.998342	14901	0	0.70468	0.0034968	0.015042	0.992403	195	4	0.70468
FBgn0030884	6	0.43915	0.59565	0.988564	8943	2	0.53295	0.0035103	0.015098	0.992403	196	4	0.53295
FBgn0259209	8	0.23889	0.45336	0.986685	6263	1	0.58868	0.0035523	0.017244	0.992403	197	6	0.58868
FBgn0051320	6	0.50773	0.65269	0.988564	9747	1	0.073778	0.003577	0.015356	0.992403	198	2	0.073778
FBgn0020503	10	0.7599	0.86963	0.989455	12323	1	0.34673	0.0035847	0.019212	0.992403	199	5	0.34673
FBgn0035025	6	0.95237	0.95228	0.998342	14886	0	1.0383	0.0035885	0.015407	0.992403	200	5	1.0383
FBgn0259227	5	0.86687	0.86716	0.989455	13531	0	0.55228	0.0035901	0.014975	0.992403	201	4	0.55228
FBgn0031091	6	0.56464	0.70191	0.988564	10358	2	0.50679	0.0035958	0.015432	0.992403	202	4	0.50679
FBgn0035998	6	0.98059	0.98063	0.999085	15333	0	0.60972	0.0036113	0.015489	0.992403	203	5	0.60972
FBgn0036150	6	0.99037	0.9904	0.999085	15479	0	0.73267	0.0036236	0.015544	0.992403	204	5	0.73267
FBgn0263661	4	0.99637	0.99639	0.999157	15579	0	0.63303	0.0036284	0.012694	0.992403	205	4	0.63303
FBgn0015509	4	0.77206	0.77141	0.989455	12435	0	0.047924	0.0036319	0.01271	0.992403	206	2	0.047924
FBgn0001323	6	0.02999	0.091078	0.952497	1408	4	-0.6437	0.0036327	0.015577	0.992403	207	2	-0.6437
FBgn0031209	6	0.15892	0.3156	0.979758	4783	3	0.21416	0.0036487	0.015639	0.992403	208	3	0.21416
FBgn0020388	6	0.74544	0.78738	0.989455	12081	1	0.78026	0.0036503	0.015645	0.992403	209	4	0.78026
FBgn0052712	6	0.10596	0.23935	0.979758	3594	1	0.50629	0.003651	0.015646	0.992403	210	5	0.50629
FBgn0033648	6	0.15529	0.31046	0.979758	4711	3	0.24067	0.0036669	0.015694	0.992403	211	3	0.24067
FBgn0261813	4	0.33603	0.47363	0.986685	7851	2	-0.49771	0.0036793	0.012873	0.992403	212	1	-0.49771
FBgn0259223	6	0.66606	0.75107	0.989455	11414	1	0.42387	0.0036833	0.01575	0.992403	213	3	0.42387
FBgn0029697	6	0.14399	0.29438	0.979758	4446	2	0.90467	0.0036957	0.015801	0.992403	214	4	0.90467
FBgn0040392	6	0.22168	0.40209	0.979758	6000	2	0.68706	0.0037128	0.015877	0.992403	215	3	0.68706
FBgn0036821	6	0.56464	0.70191	0.988564	10276	2	0.47459	0.003734	0.015954	0.992403	216	3	0.47459
FBgn0034506	6	0.93138	0.9312	0.998342	14545	0	0.65026	0.0037465	0.016	0.992403	217	4	0.65026
FBgn0028893	6	0.10205	0.23356	0.979758	3503	1	0.65576	0.0037665	0.016077	0.992403	218	5	0.65576
FBgn0037183	6	0.94973	0.9496	0.998342	14837	0	0.33967	0.0037736	0.0161	0.992403	219	3	0.33967
FBgn0033174	6	0.065075	0.1726	0.967275	2540	4	-0.77217	0.0037736	0.0161	0.992403	220	1	-0.77217
FBgn0264984	4	0.056523	0.13086	0.967275	2261	1	1.3132	0.0038394	0.013415	0.992403	221	3	1.3132
FBgn0050458	5	0.53039	0.64382	0.988564	10015	1	0.65931	0.0038905	0.015883	0.992403	222	4	0.65931
FBgn0267603	4	0.89182	0.89136	0.998342	13954	0	1.0342	0.0038971	0.013603	0.992403	223	3	1.0342
FBgn0024371	6	0.99666	0.99663	0.999157	15583	0	0.57734	0.0039361	0.016712	0.992403	224	5	0.57734
FBgn0039355	6	0.75528	0.79255	0.989455	12295	1	0.45507	0.0039499	0.016763	0.992403	225	3	0.45507
FBgn0039938	6	0.56464	0.70191	0.988564	10473	2	0.53202	0.0039513	0.016769	0.992403	226	4	0.53202
FBgn0265876	4	0.81138	0.81091	0.989455	12892	0	0.005333	0.0039638	0.013828	0.992403	227	1	0.005333
FBgn0031670	6	0.16417	0.323	0.979758	4891	2	0.032108	0.0039686	0.016838	0.992403	228	3	0.032108
FBgn0032076	6	0.14178	0.29128	0.979758	4400	2	0.27936	0.003986	0.016909	0.992403	229	3	0.27936
FBgn0270927	4	0.9656	0.9654	0.998342	15111	0	0.39289	0.0040112	0.01399	0.992403	230	2	0.39289
FBgn0263391	8	0.21355	0.42748	0.979758	5863	1	0.28723	0.0040137	0.019104	0.992403	231	4	0.28723
FBgn0045486	6	0.1384	0.28653	0.979758	4329	3	-0.47847	0.0040223	0.017047	0.992403	232	2	-0.47847
FBgn0030645	6	0.7998	0.81841	0.989455	12764	1	0.55873	0.0040306	0.017072	0.992403	233	4	0.55873
FBgn0265688	4	0.039063	0.095323	0.962982	1728	3	-0.45163	0.0040586	0.014143	0.992403	234	1	-0.45163
FBgn0265762	6	0.58018	0.71563	0.989455	10706	1	0.74758	0.0040754	0.017239	0.992403	235	5	0.74758
FBgn0031920	6	0.21167	0.38859	0.979758	5831	3	-0.22406	0.0040934	0.017317	0.992403	236	2	-0.22406
FBgn0028372	6	0.73871	0.78393	0.989455	12040	1	0.86221	0.0041161	0.017399	0.992403	237	4	0.86221
FBgn0036689	6	0.98747	0.98747	0.999085	15433	0	0.66231	0.0041161	0.017399	0.992403	238	4	0.66231
FBgn0267468	4	0.78036	0.77976	0.989455	12535	0	0.88387	0.0041639	0.014504	0.992403	239	3	0.88387
FBgn0031494	6	0.20412	0.37845	0.979758	5657	3	-0.25388	0.0041645	0.017565	0.992403	240	2	-0.25388
FBgn0261597	6	0.45684	0.6101	0.988564	9147	1	0.88668	0.0041825	0.017635	0.992403	241	4	0.88668
FBgn0260869	6	0.049062	0.13625	0.967275	2029	1	0.76487	0.0041976	0.0177	0.992403	242	4	0.76487
FBgn0052105	6	0.78829	0.81116	0.989455	12625	1	0.5033	0.0041976	0.0177	0.992403	243	3	0.5033
FBgn0264720	4	0.86945	0.86904	0.989455	13546	0	0.86929	0.0042399	0.014767	0.992403	244	3	0.86929
FBgn0032434	6	0.96666	0.96672	0.998417	15128	0	0.61028	0.0043114	0.018133	0.992403	245	4	0.61028
FBgn0039260	6	0.052354	0.14377	0.967275	2135	2	0.79381	0.0043233	0.018175	0.992403	246	4	0.79381
FBgn0267087	4	0.99328	0.9933	0.999085	15531	0	0.75273	0.0043274	0.015045	0.992403	247	4	0.75273
FBgn0263442	4	0.68272	0.69072	0.988564	11554	1	1.0813	0.0043551	0.015146	0.992403	248	3	1.0813
FBgn0037218	4	0.18344	0.3002	0.979758	5271	1	1.433	0.0043737	0.015211	0.992403	249	3	1.433
FBgn0040905	6	0.76044	0.7953	0.989455	12329	1	0.68842	0.0043872	0.018399	0.992403	250	5	0.68842
FBgn0265418	4	0.99561	0.99562	0.999085	15573	0	0.75079	0.0043945	0.015285	0.992403	251	4	0.75079
FBgn0024973	6	0.99803	0.99797	0.999348	15604	0	0.46082	0.0044117	0.018485	0.992403	252	5	0.46082
FBgn0031820	6	0.99538	0.99541	0.999085	15568	0	0.40727	0.0044399	0.018599	0.992403	253	5	0.40727
FBgn0050184	6	0.17838	0.34293	0.979758	5161	2	0.014021	0.0044487	0.018635	0.992403	254	3	0.014021
FBgn0050417	6	0.59389	0.72353	0.989455	10816	1	0.33562	0.0044487	0.018635	0.992403	255	4	0.33562
FBgn0052816	8	0.90722	0.91504	0.998342	14201	1	0.59422	0.0044691	0.020928	0.992403	256	4	0.59422
FBgn0034345	6	0.90428	0.90401	0.998342	14158	0	0.61089	0.0044895	0.018777	0.992403	257	4	0.61089
FBgn0263598	7	0.9614	0.96133	0.998342	15036	0	0.56669	0.0044905	0.021008	0.992403	258	6	0.56669
FBgn0031430	6	0.49634	0.64308	0.988564	9604	2	0.29851	0.0045217	0.018912	0.992403	259	3	0.29851
FBgn0031673	7	0.99105	0.99113	0.999085	15495	0	0.22406	0.0045254	0.021153	0.992403	260	4	0.22406
FBgn0026144	6	0.99004	0.99006	0.999085	15476	0	0.62173	0.004565	0.019061	0.992403	261	5	0.62173
FBgn0036116	8	0.7184	0.82916	0.989455	11885	2	0.62724	0.0045895	0.02142	0.992403	262	5	0.62724
FBgn0043791	6	0.014383	0.051481	0.950637	771	2	0.39351	0.0045898	0.019157	0.992403	263	4	0.39351
FBgn0037489	6	0.052671	0.14454	0.967275	2142	4	-0.44049	0.0045908	0.019159	0.992403	264	2	-0.44049
FBgn0243513	6	0.4886	0.63649	0.988564	9522	1	0.62145	0.0046173	0.019259	0.992403	265	5	0.62145
FBgn0033792	8	0.13073	0.30375	0.979758	4168	3	0.014404	0.0046183	0.021535	0.992403	266	3	0.014404
FBgn0263327	4	0.54691	0.59622	0.988564	10144	1	0.20955	0.0046272	0.016053	0.992403	267	2	0.20955
FBgn0039187	5	0.76437	0.77466	0.989455	12371	1	0.43782	0.0046563	0.018301	0.992403	268	3	0.43782
FBgn0038206	6	0.92921	0.92905	0.998342	14511	0	0.52518	0.0046567	0.01941	0.992403	269	5	0.52518
FBgn0034027	4	0.99534	0.99536	0.999085	15567	0	0.74129	0.004657	0.016156	0.992403	270	4	0.74129
FBgn0266728	4	0.79298	0.79241	0.989455	12681	0	1.0393	0.004704	0.016331	0.992403	271	3	1.0393
FBgn0267104	6	0.91948	0.91915	0.998342	14383	0	0.60413	0.0047275	0.019641	0.992403	272	4	0.60413
FBgn0263088	4	0.99384	0.99387	0.999085	15543	0	1.1358	0.0047475	0.01648	0.992403	273	4	1.1358
FBgn0267110	4	0.55582	0.60169	0.988564	10207	1	0.51699	0.0047588	0.016525	0.992403	274	3	0.51699
FBgn0267964	6	0.89914	0.89895	0.998342	14062	0	0.55278	0.0047611	0.019778	0.992403	275	5	0.55278
FBgn0032031	6	0.65077	0.7448	0.989455	11300	1	0.66762	0.004762	0.019782	0.992403	276	4	0.66762
FBgn0027497	6	0.0046748	0.019333	0.926279	300	5	-0.43685	0.0048039	0.019944	0.992403	277	1	-0.43685
FBgn0267977	4	0.86478	0.86442	0.989455	13516	0	-0.066174	0.0048167	0.016719	0.992403	278	1	-0.066174
FBgn0015623	7	0.27797	0.47789	0.98743	7007	2	0.23095	0.0048546	0.022593	0.992403	279	3	0.23095
FBgn0037431	6	0.94317	0.94302	0.998342	14732	0	0.1787	0.0048749	0.020205	0.992403	280	2	0.1787
FBgn0029724	6	0.50692	0.65198	0.988564	9738	2	0.34691	0.004913	0.020339	0.992403	281	3	0.34691
FBgn0035513	6	0.75254	0.79111	0.989455	12269	1	0.56333	0.0049367	0.020423	0.992403	282	5	0.56333
FBgn0261952	3	0.70774	0.70782	0.989455	11776	0	0.030315	0.0049657	0.013739	0.992403	283	1	0.030315
FBgn0053110	6	0.91721	0.91686	0.998342	14343	0	0.35177	0.0049879	0.020608	0.992403	284	5	0.35177
FBgn0031617	6	0.05078	0.14019	0.967275	2096	4	-0.45428	0.0049962	0.020641	0.992403	285	2	-0.45428
FBgn0031286	4	0.995	0.99501	0.999085	15562	0	0.89488	0.0050031	0.017315	0.992403	286	4	0.89488
FBgn0267314	4	0.08851	0.19113	0.979758	3218	2	-0.35648	0.0050061	0.017326	0.992403	287	1	-0.35648
FBgn0025612	6	0.77714	0.80463	0.989455	12485	1	-0.12413	0.0050169	0.020714	0.992403	288	1	-0.12413
FBgn0025781	6	0.97485	0.97489	0.999027	15249	0	0.59321	0.0050227	0.02073	0.992403	289	4	0.59321
FBgn0052201	6	0.92571	0.92557	0.998342	14468	0	0.13874	0.0050395	0.020795	0.992403	290	3	0.13874
FBgn0265276	12	0.87752	0.93998	0.998342	13855	2	0.18722	0.0050567	0.027804	0.992403	291	6	0.18722
FBgn0265918	4	0.99492	0.99494	0.999085	15560	0	0.52644	0.0050841	0.017594	0.992403	292	4	0.52644
FBgn0033862	6	0.99831	0.99825	0.999348	15610	0	0.38657	0.0050853	0.020958	0.992403	293	5	0.38657
FBgn0260857	6	0.72019	0.77487	0.989455	11902	1	0.30354	0.0050879	0.020966	0.992403	294	3	0.30354
FBgn0085458	5	0.96326	0.96344	0.998342	15066	0	1.0143	0.0051525	0.019857	0.992403	295	3	1.0143
FBgn0263083	6	0.4305	0.58852	0.988564	8852	2	0.49415	0.00523	0.02152	0.992403	296	3	0.49415
FBgn0267712	4	0.89303	0.89255	0.998342	13970	0	0.77449	0.0052613	0.018183	0.992403	297	3	0.77449
FBgn0038512	4	0.99472	0.99475	0.999085	15555	0	0.3814	0.0052806	0.018244	0.992403	298	4	0.3814
FBgn0034283	6	0.96585	0.96593	0.998342	15115	0	0.47562	0.0052813	0.021725	0.992403	299	5	0.47562
FBgn0001180	6	0.6979	0.76463	0.989455	11678	1	0.58796	0.0052878	0.021752	0.992403	300	4	0.58796
FBgn0039709	6	0.99137	0.99138	0.999085	15501	0	0.65109	0.0052973	0.021784	0.992403	301	3	0.65109
FBgn0025790	6	0.98111	0.98113	0.999085	15342	0	0.83619	0.0053321	0.021897	0.992403	302	5	0.83619
FBgn0260429	6	0.33035	0.50816	0.988564	7695	1	0.86849	0.0053321	0.021897	0.992403	303	5	0.86849
FBgn0040950	6	0.96501	0.96508	0.998342	15097	0	0.57802	0.0053321	0.021897	0.992403	304	5	0.57802
FBgn0037130	6	0.97895	0.97899	0.999085	15293	0	0.70553	0.0053321	0.021897	0.992403	305	5	0.70553
FBgn0027549	6	0.24289	0.43067	0.979758	6512	3	-0.59036	0.0053365	0.021913	0.992403	306	1	-0.59036
FBgn0032860	6	0.30146	0.48561	0.988564	7323	1	0.3879	0.0053365	0.021913	0.992403	307	4	0.3879
FBgn0265449	4	0.10146	0.20604	0.979758	3487	2	-0.24235	0.0053376	0.018417	0.992403	308	1	-0.24235
FBgn0050005	6	0.75713	0.79352	0.989455	12309	1	0.066507	0.0053739	0.022053	0.992403	309	2	0.066507
FBgn0053170	6	0.3872	0.55327	0.988564	8418	1	0.52364	0.0054169	0.022211	0.992403	310	4	0.52364
FBgn0052547	6	0.97895	0.97899	0.999085	15300	0	0.76756	0.0054211	0.022225	0.992403	311	5	0.76756
FBgn0011766	10	0.25031	0.49057	0.988564	6630	2	0.4382	0.0055275	0.027757	0.992403	312	5	0.4382
FBgn0031914	8	0.37829	0.59335	0.988564	8314	1	0.17312	0.0055326	0.025143	0.992403	313	4	0.17312
FBgn0036160	6	0.33851	0.5146	0.988564	7909	1	0.58226	0.0055633	0.022748	0.992403	314	5	0.58226
FBgn0085376	6	0.064176	0.17067	0.967275	2462	2	-0.28063	0.0055741	0.022794	0.992403	315	2	-0.28063
FBgn0039671	6	0.56842	0.70523	0.989455	10610	1	0.68722	0.0055741	0.022794	0.992403	316	4	0.68722
FBgn0031045	6	0.68634	0.75963	0.989455	11581	1	0.22373	0.0055741	0.022794	0.992403	317	3	0.22373
FBgn0032632	6	0.55173	0.69064	0.988564	10177	1	1.119	0.0055741	0.022794	0.992403	318	4	1.119
FBgn0267733	4	0.33603	0.47363	0.986685	7842	2	-0.10184	0.0055744	0.019212	0.992403	319	2	-0.10184
FBgn0035149	4	0.99441	0.99445	0.999085	15551	0	0.79569	0.0055888	0.019256	0.992403	320	4	0.79569
FBgn0036545	4	0.095044	0.19862	0.979758	3347	2	0.042122	0.0055896	0.019258	0.992403	321	2	0.042122
FBgn0260932	6	0.01706	0.058371	0.950637	876	2	0.61688	0.0057128	0.023307	0.992403	322	3	0.61688
FBgn0003545	4	0.5527	0.59979	0.988564	10186	1	0.53999	0.005726	0.019743	0.992403	323	2	0.53999
FBgn0050462	2	0.99426	0.99411	0.999085	15548	0	1.3074	0.0057435	0.010898	0.992403	324	2	1.3074
FBgn0035825	4	0.016542	0.046814	0.950637	855	2	-0.1983	0.0057637	0.019866	0.992403	325	2	-0.1983
FBgn0003415	6	0.87515	0.8755	0.989455	13803	1	0.16821	0.0057978	0.023619	0.992403	326	2	0.16821
FBgn0261928	6	0.857	0.85956	0.989455	13467	1	0.25523	0.0057978	0.023619	0.992403	327	3	0.25523
FBgn0265934	4	0.069337	0.15643	0.967275	2704	1	0.85083	0.0058079	0.020006	0.992403	328	3	0.85083
FBgn0266939	4	0.50108	0.56934	0.988564	9672	1	0.70921	0.0058079	0.020006	0.992403	329	3	0.70921
FBgn0260799	6	0.99795	0.9979	0.999348	15602	0	0.44655	0.0058658	0.023866	0.992403	330	5	0.44655
FBgn0037936	5	0.85129	0.85162	0.989455	13394	0	0.45933	0.0059216	0.022285	0.992403	331	4	0.45933
FBgn0004050	6	0.97661	0.97668	0.999085	15275	0	0.71118	0.0060004	0.024358	0.992403	332	5	0.71118
FBgn0052251	6	0.92183	0.92156	0.998342	14414	0	0.48012	0.0060153	0.024414	0.992403	333	3	0.48012
FBgn0263387	2	0.014034	0.026259	0.926279	757	1	0.27788	0.0060167	0.0114	0.992403	334	1	0.27788
FBgn0026755	6	0.67414	0.75447	0.989455	11486	1	0.60299	0.0060227	0.024443	0.992403	335	5	0.60299
FBgn0029987	6	0.17757	0.34183	0.979758	5151	2	0.84235	0.0060329	0.024478	0.992403	336	4	0.84235
FBgn0033888	6	0.69308	0.76257	0.989455	11639	1	0.48815	0.0060631	0.024583	0.992403	337	5	0.48815
FBgn0037044	2	0.95452	0.95441	0.998342	14922	0	1.8512	0.0060641	0.011481	0.992403	338	2	1.8512
FBgn0038611	6	0.16398	0.32275	0.979758	4882	2	-0.11326	0.0060797	0.024643	0.992403	339	2	-0.11326
FBgn0266949	4	0.84913	0.84862	0.989455	13360	0	0.38458	0.0061054	0.020992	0.992403	340	2	0.38458
FBgn0086704	6	0.99155	0.99158	0.999085	15503	0	0.79176	0.0061345	0.024829	0.992403	341	5	0.79176
FBgn0025709	6	0.24289	0.43067	0.979758	6374	3	-0.31023	0.0061526	0.0249	0.992403	342	3	-0.31023
FBgn0038862	6	0.81764	0.83009	0.989455	12971	1	0.076691	0.0061716	0.024976	0.992403	343	2	0.076691
FBgn0264271	4	0.75019	0.74998	0.989455	12225	1	0.3399	0.0061897	0.021251	0.992403	344	2	0.3399
FBgn0039626	4	0.81906	0.81852	0.989455	12993	0	0.68564	0.0062169	0.021343	0.992403	345	2	0.68564
FBgn0026309	6	0.20971	0.38594	0.979758	5784	1	0.18426	0.006223	0.025166	0.992403	346	3	0.18426
FBgn0034658	6	0.71356	0.77175	0.989455	11828	1	0.23059	0.0062235	0.025167	0.992403	347	3	0.23059
FBgn0033250	6	0.74686	0.78811	0.989455	12090	1	0.60951	0.00623	0.02519	0.992403	348	4	0.60951
FBgn0052343	4	0.99374	0.99377	0.999085	15541	0	0.64173	0.0062578	0.021466	0.992403	349	4	0.64173
FBgn0002838	6	0.059943	0.16111	0.967275	2354	2	0.81907	0.0062642	0.025308	0.992403	350	4	0.81907
FBgn0030739	1	0.99372	0.99384	0.999085	15540	0	1.67	0.0062813	0.0062405	0.992403	351	1	1.67
FBgn0028427	6	0.97689	0.97696	0.999085	15277	0	0.67367	0.0063503	0.025617	0.992403	352	4	0.67367
FBgn0250826	6	0.14058	0.28966	0.979758	4377	2	0.32336	0.0063644	0.025679	0.992403	353	3	0.32336
FBgn0038548	6	0.2051	0.37973	0.979758	5680	3	-0.21006	0.0063654	0.025683	0.992403	354	2	-0.21006
FBgn0038168	4	0.78979	0.78925	0.989455	12638	0	1.2161	0.0063692	0.021831	0.992403	355	3	1.2161
FBgn0051974	4	0.65106	0.66637	0.988564	11304	1	0.7393	0.0063692	0.021831	0.992403	356	3	0.7393
FBgn0263657	4	0.9936	0.99363	0.999085	15537	0	0.63042	0.0063964	0.021929	0.992403	357	4	0.63042
FBgn0028880	6	0.31399	0.49529	0.988564	7497	2	0.35553	0.0063967	0.025821	0.992403	358	3	0.35553
FBgn0015519	6	0.99243	0.99248	0.999085	15519	0	0.37015	0.006401	0.025834	0.992403	359	5	0.37015
FBgn0028837	6	0.24172	0.42907	0.979758	6296	1	0.51844	0.0064203	0.025904	0.992403	360	4	0.51844
FBgn0267192	4	0.54382	0.59428	0.988564	10122	1	1.2395	0.0064494	0.022096	0.992403	361	3	1.2395
FBgn0024330	10	0.22792	0.46339	0.986685	6092	1	0.46134	0.0064575	0.031743	0.992403	362	6	0.46134
FBgn0267777	4	0.81491	0.81441	0.989455	12944	0	1.1095	0.006463	0.022143	0.992403	363	3	1.1095
FBgn0035529	6	0.98843	0.98844	0.999085	15446	0	0.82206	0.006488	0.026146	0.992403	364	5	0.82206
FBgn0265309	4	0.93152	0.93114	0.998342	14547	0	0.55208	0.0065036	0.022264	0.992403	365	3	0.55208
FBgn0265011	6	0.97444	0.97447	0.998986	15240	0	0.48558	0.0065381	0.026298	0.992403	366	5	0.48558
FBgn0082831	6	0.96726	0.9673	0.998417	15132	0	0.81106	0.0065479	0.026333	0.992403	367	4	0.81106
FBgn0033777	16	0.57885	0.82987	0.989455	10691	3	0.28498	0.0065598	0.038383	0.992403	368	10	0.28498
FBgn0267984	4	0.5279	0.58482	0.988564	9987	1	0.61569	0.0065908	0.022534	0.992403	369	2	0.61569
FBgn0266072	4	0.99341	0.99344	0.999085	15533	0	0.66046	0.0065944	0.022546	0.992403	370	4	0.66046
FBgn0266651	4	0.94486	0.9446	0.998342	14755	0	0.38745	0.0066155	0.022613	0.992403	371	3	0.38745
FBgn0030390	6	0.087811	0.21231	0.979758	3195	1	0.66081	0.0066488	0.026663	0.992403	372	4	0.66081
FBgn0263998	6	0.017793	0.060305	0.950637	913	4	-0.37327	0.0066491	0.026665	0.992403	373	1	-0.37327
FBgn0037700	6	0.68482	0.75899	0.989455	11569	1	-0.25068	0.0066491	0.026665	0.992403	374	1	-0.25068
FBgn0013997	3	0.83647	0.83614	0.989455	13188	0	0.79604	0.0066706	0.018261	0.992403	375	2	0.79604
FBgn0030558	6	0.31855	0.49883	0.988564	7552	2	0.6908	0.0066872	0.026816	0.992403	376	4	0.6908
FBgn0038190	6	0.99482	0.99484	0.999085	15558	0	0.34628	0.0067176	0.026923	0.992403	377	5	0.34628
FBgn0005666	7	0.33717	0.54579	0.988564	7893	3	-0.29713	0.0067609	0.029302	0.992403	378	2	-0.29713
FBgn0010607	4	0.75019	0.74998	0.989455	12129	1	-0.21935	0.0068047	0.023183	0.992403	379	1	-0.21935
FBgn0040972	6	0.014178	0.050943	0.950637	765	3	0.076357	0.0068084	0.027272	0.992403	380	3	0.076357
FBgn0025469	4	0.99318	0.9932	0.999085	15529	0	0.6294	0.0068189	0.023233	0.992403	381	4	0.6294
FBgn0263608	6	0.56464	0.70191	0.988564	10450	2	0.24562	0.006842	0.027379	0.992403	382	3	0.24562
FBgn0038914	4	0.97006	0.96984	0.998471	15178	0	0.73628	0.0068551	0.023345	0.992403	383	3	0.73628
FBgn0030893	6	0.99348	0.99349	0.999085	15536	0	0.58355	0.0068797	0.027514	0.992403	384	5	0.58355
FBgn0085317	6	0.53159	0.67306	0.988564	10033	1	0.90268	0.0068839	0.027533	0.992403	385	4	0.90268
FBgn0050334	6	0.87515	0.8755	0.989455	13735	1	0.32853	0.0069378	0.027715	0.992403	386	3	0.32853
FBgn0265657	4	0.96182	0.96161	0.998342	15043	0	0.7387	0.0069474	0.023635	0.992403	387	2	0.7387
FBgn0042185	5	0.89942	0.89966	0.998342	14070	0	0.24389	0.0069631	0.025331	0.992403	388	2	0.24389
FBgn0266147	4	0.99303	0.99306	0.999085	15527	0	0.68568	0.0069656	0.023701	0.992403	389	4	0.68568
FBgn0005278	10	0.35833	0.61461	0.988564	8114	2	0.16395	0.0069789	0.033967	0.992403	390	5	0.16395
FBgn0033638	7	0.99617	0.99614	0.999157	15577	0	0.63662	0.006987	0.030046	0.992403	391	4	0.63662
FBgn0034759	2	0.82362	0.82304	0.989455	13057	0	1.1439	0.0069882	0.013172	0.992403	392	1	1.1439
FBgn0053764	6	0.20058	0.37361	0.979758	5590	1	0.56319	0.0069933	0.02791	0.992403	393	4	0.56319
FBgn0037757	6	0.92183	0.92156	0.998342	14413	0	0.6525	0.0070036	0.027951	0.992403	394	5	0.6525
FBgn0031722	6	0.99331	0.99333	0.999085	15532	0	0.61499	0.0070266	0.028043	0.992403	395	5	0.61499
FBgn0036974	5	0.86687	0.86716	0.989455	13530	0	1.0143	0.0070503	0.025591	0.992403	396	3	1.0143
FBgn0011227	6	0.10436	0.23705	0.979758	3553	3	-0.11482	0.0070745	0.028215	0.992403	397	3	-0.11482
FBgn0026179	10	0.99411	0.99415	0.999085	15546	0	0.27935	0.007122	0.034588	0.992403	398	4	0.27935
FBgn0005638	6	0.93049	0.93034	0.998342	14535	0	0.26098	0.0071268	0.028422	0.992403	399	3	0.26098
FBgn0036804	6	0.56464	0.70191	0.988564	10465	2	0.38201	0.0071454	0.028503	0.992403	400	4	0.38201
FBgn0028527	6	0.15109	0.30448	0.979758	4604	2	0.66612	0.0071678	0.028575	0.992403	401	4	0.66612
FBgn0032493	6	0.70084	0.76598	0.989455	11709	1	0.83557	0.0072262	0.028779	0.992403	402	5	0.83557
FBgn0267261	4	0.95408	0.95388	0.998342	14910	0	0.80646	0.00723	0.024566	0.992403	403	2	0.80646
FBgn0030805	6	0.93548	0.93537	0.998342	14615	0	0.74799	0.0072335	0.028806	0.992403	404	4	0.74799
FBgn0037571	6	0.51092	0.6554	0.988564	9789	2	0.80367	0.0072335	0.028806	0.992403	405	4	0.80367
FBgn0058045	5	0.0043602	0.016712	0.926111	281	1	0.8148	0.0072437	0.026146	0.992403	406	3	0.8148
FBgn0262881	6	0.44542	0.60062	0.988564	9019	2	0.20369	0.0072479	0.028864	0.992403	407	3	0.20369
FBgn0031384	8	0.97548	0.9756	0.999085	15258	0	0.40043	0.0072715	0.032087	0.992403	408	6	0.40043
FBgn0265965	4	0.99273	0.99278	0.999085	15524	0	0.53536	0.007272	0.024706	0.992403	409	4	0.53536
FBgn0052206	6	0.23189	0.41588	0.979758	6156	2	-0.38443	0.0072872	0.028984	0.992403	410	2	-0.38443
FBgn0027580	6	0.83382	0.84159	0.989455	13163	1	0.17593	0.0072996	0.029028	0.992403	411	3	0.17593
FBgn0038295	6	0.30504	0.48839	0.988564	7385	2	0.15394	0.0073093	0.029065	0.992403	412	3	0.15394
FBgn0002578	6	0.97026	0.97039	0.998471	15183	0	0.53102	0.0073208	0.029107	0.992403	413	5	0.53102
FBgn0034361	4	0.88764	0.88715	0.998342	13904	0	1.2036	0.007349	0.024945	0.992403	414	3	1.2036
FBgn0032058	6	0.97895	0.97899	0.999085	15306	0	0.2082	0.0073581	0.029236	0.992403	415	3	0.2082
FBgn0263747	5	0.006163	0.022433	0.926279	379	2	0.7031	0.0073767	0.026514	0.992403	416	3	0.7031
FBgn0031010	6	0.65508	0.74659	0.989455	11337	1	0.48277	0.0074096	0.029418	0.992403	417	5	0.48277
FBgn0024320	4	0.99258	0.99264	0.999085	15522	0	0.59738	0.0074235	0.025196	0.992403	418	4	0.59738
FBgn0263987	6	0.89644	0.89625	0.998342	14023	0	0.17437	0.0074998	0.029777	0.992403	419	3	0.17437
FBgn0263408	4	0.84692	0.8464	0.989455	13325	0	0.82366	0.0075139	0.025501	0.992403	420	3	0.82366
FBgn0024150	8	0.88958	0.90462	0.998342	13914	1	0.095242	0.0075341	0.033137	0.992403	421	3	0.095242
FBgn0027085	6	0.11356	0.25064	0.979758	3759	2	0.20342	0.0075939	0.030138	0.992403	422	3	0.20342
FBgn0039817	6	0.51112	0.65555	0.988564	9790	1	0.39322	0.0076096	0.030209	0.992403	423	4	0.39322
FBgn0031741	6	0.24877	0.43847	0.98469	6617	1	0.58813	0.0076221	0.030261	0.992403	424	5	0.58813
FBgn0020376	6	0.96122	0.96126	0.998342	15032	0	0.44773	0.0076395	0.030325	0.992403	425	5	0.44773
FBgn0039104	6	0.13356	0.27966	0.979758	4233	2	0.14023	0.0076398	0.030326	0.992403	426	2	0.14023
FBgn0020653	6	0.98358	0.98361	0.999085	15374	0	0.62052	0.0076415	0.030334	0.992403	427	4	0.62052
FBgn0035092	6	0.56464	0.70191	0.988564	10424	2	0.34304	0.007677	0.030452	0.992403	428	3	0.34304
FBgn0267564	4	0.9851	0.9851	0.999085	15394	0	0.74083	0.0076956	0.026072	0.992403	429	3	0.74083
FBgn0039507	8	0.81534	0.87242	0.989455	12948	1	0.67274	0.0077037	0.033807	0.992403	430	5	0.67274
FBgn0034475	6	0.04103	0.1175	0.967275	1790	3	-0.24348	0.0077124	0.030569	0.992403	431	1	-0.24348
FBgn0034902	6	0.39027	0.55582	0.988564	8461	2	0.74512	0.0077137	0.030576	0.992403	432	4	0.74512
FBgn0036437	6	0.82012	0.83179	0.989455	13005	1	0.55692	0.0077137	0.030576	0.992403	433	4	0.55692
FBgn0061515	6	0.32095	0.50068	0.988564	7589	2	0.78401	0.0077729	0.030801	0.992403	434	4	0.78401
FBgn0033845	6	0.5812	0.71654	0.989455	10717	1	-0.096401	0.0077832	0.030835	0.992403	435	2	-0.096401
FBgn0250846	6	0.99508	0.99511	0.999085	15563	0	0.51852	0.0077841	0.030837	0.992403	436	5	0.51852
FBgn0041094	6	0.85728	0.85981	0.989455	13473	1	0.64453	0.0077841	0.030837	0.992403	437	5	0.64453
FBgn0265710	2	0.99219	0.99205	0.999085	15514	0	1.4348	0.0078066	0.014661	0.992403	438	2	1.4348
FBgn0032713	6	0.96371	0.96378	0.998342	15072	0	0.57134	0.0078121	0.03094	0.992403	439	4	0.57134
FBgn0035501	6	0.31622	0.49697	0.988564	7520	2	0.57421	0.0078279	0.031005	0.992403	440	3	0.57421
FBgn0051157	6	0.81814	0.8304	0.989455	12978	1	0.35628	0.0078279	0.031005	0.992403	441	3	0.35628
FBgn0019661	6	0.54405	0.68401	0.988564	10123	1	0.45088	0.0078376	0.03103	0.992403	442	4	0.45088
FBgn0266897	4	0.92375	0.92344	0.998342	14445	0	0.2433	0.0078448	0.02657	0.992403	443	2	0.2433
FBgn0051225	6	0.79577	0.81581	0.989455	12711	1	-0.054998	0.0078541	0.03109	0.992403	444	2	-0.054998
FBgn0034784	6	0.5195	0.66267	0.988564	9886	1	0.55472	0.0078547	0.031091	0.992403	445	5	0.55472
FBgn0267100	4	0.8954	0.89497	0.998342	14008	0	0.66281	0.0078604	0.026626	0.992403	446	3	0.66281
FBgn0040283	6	0.98843	0.98844	0.999085	15445	0	0.62164	0.0078623	0.031124	0.992403	447	5	0.62164
FBgn0262963	4	0.82427	0.82377	0.989455	13062	0	0.49532	0.0078921	0.02672	0.992403	448	3	0.49532
FBgn0036618	6	0.24289	0.43067	0.979758	6464	3	-0.26848	0.0079249	0.031343	0.992403	449	2	-0.26848
FBgn0033234	8	0.97946	0.97947	0.999085	15313	0	0.4454	0.0079722	0.034854	0.992403	450	6	0.4454
FBgn0051019	6	0.85855	0.86088	0.989455	13483	1	0.69843	0.008018	0.031695	0.992403	451	4	0.69843
FBgn0266938	4	0.79395	0.7934	0.989455	12692	0	1.1932	0.0080232	0.027128	0.992403	452	3	1.1932
FBgn0263336	4	0.84953	0.84899	0.989455	13365	0	0.85347	0.0080339	0.027156	0.992403	453	3	0.85347
FBgn0260011	6	0.92037	0.92005	0.998342	14400	0	0.81773	0.0080423	0.031774	0.992403	454	4	0.81773
FBgn0028491	6	0.80645	0.82262	0.989455	12843	1	0.79453	0.0080423	0.031774	0.992403	455	5	0.79453
FBgn0051861	6	0.52305	0.66569	0.988564	9922	2	0.46713	0.0080423	0.031774	0.992403	456	3	0.46713
FBgn0003862	6	0.99079	0.99082	0.999085	15489	0	0.32151	0.0080666	0.031847	0.992403	457	3	0.32151
FBgn0047338	6	0.99624	0.99624	0.999157	15578	0	0.40182	0.0081173	0.032023	0.992403	458	5	0.40182
FBgn0030520	6	0.57943	0.71498	0.989455	10699	1	0.39715	0.0081237	0.03204	0.992403	459	5	0.39715
FBgn0030097	6	0.97275	0.97284	0.998526	15218	0	0.40139	0.0082216	0.032392	0.992403	460	5	0.40139
FBgn0030838	4	0.21441	0.3357	0.979758	5878	1	-0.26597	0.0082465	0.027837	0.992403	461	1	-0.26597
FBgn0041789	13	0.78191	0.91069	0.998342	12551	3	-0.09712	0.0082509	0.043479	0.992403	462	6	-0.09712
FBgn0052832	5	0.67932	0.71858	0.989455	11534	1	0.14171	0.0082625	0.029176	0.992403	463	2	0.14171
FBgn0263597	6	0.83694	0.84398	0.989455	13200	1	0.51836	0.0083499	0.0328	0.992403	464	3	0.51836
FBgn0033791	6	0.072778	0.18951	0.979758	2792	3	-0.12753	0.0083499	0.0328	0.992403	465	3	-0.12753
FBgn0053258	6	0.14401	0.29441	0.979758	4447	3	0.079347	0.0083499	0.0328	0.992403	466	3	0.079347
FBgn0039274	4	0.038302	0.093716	0.959303	1700	2	-0.26241	0.0083646	0.02823	0.992403	467	2	-0.26241
FBgn0040958	6	0.98705	0.9871	0.999085	15422	0	0.60006	0.0084164	0.033038	0.992403	468	4	0.60006
FBgn0039038	6	0.74261	0.78594	0.989455	12063	1	0.13625	0.0084166	0.033039	0.992403	469	3	0.13625
FBgn0036978	4	0.71915	0.72135	0.989455	11887	1	0.61821	0.0084416	0.028448	0.992403	470	3	0.61821
FBgn0017414	4	0.10293	0.20768	0.979758	3518	1	0.4521	0.0084591	0.028494	0.992403	471	2	0.4521
FBgn0003321	4	0.99148	0.99153	0.999085	15502	0	0.57655	0.0085241	0.028703	0.992403	472	4	0.57655
FBgn0261245	6	0.096103	0.22477	0.979758	3375	2	0.40057	0.0085714	0.033581	0.992403	473	3	0.40057
FBgn0267327	6	0.95497	0.95493	0.998342	14930	0	0.2502	0.0085993	0.033678	0.992403	474	3	0.2502
FBgn0035872	6	0.052715	0.14465	0.967275	2145	1	0.47064	0.0086639	0.033896	0.992403	475	4	0.47064
FBgn0039757	8	0.69083	0.81006	0.989455	11617	2	0.29794	0.0086948	0.037653	0.992403	476	4	0.29794
FBgn0052161	6	0.40393	0.56689	0.988564	8598	1	0.53843	0.0086997	0.034017	0.992403	477	4	0.53843
FBgn0034919	6	0.56538	0.70257	0.988806	10579	1	0.24394	0.0087039	0.03403	0.992403	478	3	0.24394
FBgn0025866	4	0.99126	0.99129	0.999085	15497	0	0.74138	0.0087449	0.029424	0.992403	479	4	0.74138
FBgn0039290	8	0.17216	0.37057	0.979758	5039	2	0.64198	0.0087599	0.037882	0.992403	480	4	0.64198
FBgn0011581	6	0.32628	0.50496	0.988564	7654	2	0.16442	0.0087747	0.03428	0.992403	481	3	0.16442
FBgn0037697	6	0.97466	0.97469	0.998986	15245	0	0.40802	0.0088081	0.034401	0.992403	482	4	0.40802
FBgn0265795	4	0.99118	0.99122	0.999085	15496	0	0.34219	0.0088152	0.029642	0.992403	483	4	0.34219
FBgn0014002	5	0.20729	0.36147	0.979758	5741	1	0.59576	0.0088527	0.030923	0.992403	484	3	0.59576
FBgn0261549	8	0.97434	0.97452	0.998986	15237	0	0.19348	0.0088557	0.038238	0.992403	485	4	0.19348
FBgn0264695	8	0.8954	0.90792	0.998342	14009	1	0.34311	0.0088557	0.038238	0.992403	486	4	0.34311
FBgn0030259	6	0.090335	0.21609	0.979758	3247	2	-0.06249	0.0088566	0.034576	0.992403	487	2	-0.06249
FBgn0026392	6	0.9458	0.94562	0.998342	14768	0	0.62159	0.0088595	0.034583	0.992403	488	5	0.62159
FBgn0266396	4	0.93716	0.93688	0.998342	14638	0	0.71951	0.0088774	0.029857	0.992403	489	3	0.71951
FBgn0037606	6	0.56464	0.70191	0.988564	10454	2	0.20034	0.0089163	0.034776	0.992403	490	3	0.20034
FBgn0062412	6	0.93403	0.93387	0.998342	14593	0	0.72349	0.0089488	0.034888	0.992403	491	4	0.72349
FBgn0035498	6	0.61343	0.73058	0.989455	10960	1	0.1252	0.0089871	0.035015	0.992403	492	3	0.1252
FBgn0039697	4	0.69911	0.70419	0.989455	11691	1	0.71112	0.0090292	0.030316	0.992403	493	3	0.71112
FBgn0263106	6	0.65784	0.7477	0.989455	11365	1	0.45214	0.0090424	0.035209	0.992403	494	5	0.45214
FBgn0266140	2	0.94571	0.94549	0.998342	14763	0	1.094	0.0090479	0.016996	0.992403	495	2	1.094
FBgn0050036	6	0.87515	0.8755	0.989455	13713	1	0.63635	0.0090483	0.035234	0.992403	496	4	0.63635
FBgn0265950	4	0.22469	0.34729	0.979758	6043	1	-0.1465	0.0091203	0.030602	0.992403	497	1	-0.1465
FBgn0267164	4	0.99087	0.99092	0.999085	15493	0	0.47911	0.0091326	0.030645	0.992403	498	4	0.47911
FBgn0040393	6	0.83174	0.84007	0.989455	13135	1	0.34372	0.009164	0.035642	0.992403	499	3	0.34372
FBgn0035014	6	0.53183	0.67325	0.988564	10035	2	0.3012	0.0092244	0.035847	0.992403	500	3	0.3012
FBgn0038003	6	0.202	0.37557	0.979758	5618	2	0.15135	0.0092738	0.036026	0.992403	501	2	0.15135
FBgn0035145	6	0.065075	0.1726	0.967275	2575	4	-0.83782	0.0093409	0.036265	0.992403	502	2	-0.83782
FBgn0031893	6	0.79159	0.81312	0.989455	12666	1	0.70352	0.0093415	0.036266	0.992403	503	4	0.70352
FBgn0265945	4	0.75019	0.74998	0.989455	12191	1	0.76354	0.0093529	0.031344	0.992403	504	3	0.76354
FBgn0267812	4	0.33476	0.4722	0.986685	7736	1	1.1614	0.0093529	0.031344	0.992403	505	3	1.1614
FBgn0037574	5	0.82339	0.8241	0.989455	13039	1	0.57435	0.0093819	0.03248	0.992403	506	4	0.57435
FBgn0038449	5	0.45739	0.6019	0.988564	9169	2	0.37243	0.0093836	0.032483	0.992403	507	3	0.37243
FBgn0032397	6	0.94317	0.94302	0.998342	14733	0	0.54392	0.0093963	0.036433	0.992403	508	5	0.54392
FBgn0035160	6	0.53629	0.6771	0.988564	10071	1	0.30007	0.0094369	0.036567	0.992403	509	3	0.30007
FBgn0027865	2	0.37682	0.38516	0.979758	8296	1	0.83352	0.0094501	0.017732	0.992403	510	1	0.83352
FBgn0033476	6	0.066098	0.17485	0.967275	2630	2	-0.38445	0.009469	0.03668	0.992403	511	2	-0.38445
FBgn0261341	5	0.95747	0.95764	0.998342	14983	0	0.42134	0.0094804	0.032777	0.992403	512	3	0.42134
FBgn0266673	6	0.93512	0.935	0.998342	14610	0	0.52225	0.0094824	0.03673	0.992403	513	4	0.52225
FBgn0053527	6	0.99676	0.99673	0.999157	15585	0	0.50924	0.0094977	0.036772	0.992403	514	3	0.50924
FBgn0004597	6	0.45917	0.61206	0.988564	9195	2	0.52344	0.0095108	0.036821	0.992403	515	3	0.52344
FBgn0052652	4	0.99045	0.99047	0.999085	15482	0	0.2845	0.0095467	0.031944	0.992403	516	4	0.2845
FBgn0034097	6	0.56464	0.70191	0.988564	10448	2	0.25116	0.0095531	0.036977	0.992403	517	3	0.25116
FBgn0050491	6	0.99813	0.99807	0.999348	15605	0	0.46769	0.0095748	0.03705	0.992403	518	5	0.46769
FBgn0045502	1	0.99041	0.9905	0.999085	15481	0	2.4209	0.0095854	0.00953	0.992403	519	1	2.4209
FBgn0035569	6	0.99482	0.99484	0.999085	15557	0	0.33679	0.0095995	0.037132	0.992403	520	5	0.33679
FBgn0005626	6	0.99874	0.99871	0.999604	15613	0	0.75313	0.0096179	0.037203	0.992403	521	5	0.75313
FBgn0037577	6	0.95203	0.95194	0.998342	14881	0	0.48051	0.0096206	0.037211	0.992403	522	5	0.48051
FBgn0021979	14	0.10487	0.31152	0.979758	3566	4	0.35786	0.0096404	0.051026	0.992403	523	8	0.35786
FBgn0039647	6	0.80333	0.82061	0.989455	12803	1	0.359	0.0096536	0.037334	0.992403	524	5	0.359
FBgn0032464	6	0.078557	0.19827	0.979758	2979	1	0.61325	0.0096928	0.037478	0.992403	525	4	0.61325
FBgn0031268	4	0.146	0.25727	0.979758	4499	1	0.61859	0.0096934	0.032403	0.992403	526	2	0.61859
FBgn0031830	6	0.99486	0.99488	0.999085	15559	0	0.43106	0.0097061	0.03752	0.992403	527	5	0.43106
FBgn0267810	4	0.17264	0.28785	0.979758	5048	1	0.23101	0.0097339	0.032542	0.992403	528	2	0.23101
FBgn0010803	6	0.74604	0.78766	0.989455	12084	1	0.59629	0.0097421	0.037647	0.992403	529	4	0.59629
FBgn0265193	6	0.047687	0.13306	0.967275	1980	2	0.39305	0.0097506	0.037683	0.992403	530	4	0.39305
FBgn0053463	6	0.74824	0.78885	0.989455	12100	1	0.54925	0.0097873	0.037819	0.992403	531	4	0.54925
FBgn0264090	6	0.98812	0.98813	0.999085	15441	0	0.65337	0.0098126	0.037894	0.992403	532	4	0.65337
FBgn0267635	4	0.004106	0.014305	0.921709	269	2	0.29808	0.0098129	0.032789	0.992403	533	2	0.29808
FBgn0259247	6	0.42709	0.58569	0.988564	8808	2	0.0078179	0.0099068	0.038217	0.992403	534	2	0.0078179
FBgn0038029	6	0.12287	0.26419	0.979758	3998	1	-0.07211	0.0099068	0.038217	0.992403	535	1	-0.07211
FBgn0051004	6	0.56464	0.70191	0.988564	10544	2	0.036651	0.0099068	0.038217	0.992403	536	3	0.036651
FBgn0037408	6	0.98158	0.9816	0.999085	15346	0	0.54612	0.0099079	0.038226	0.992403	537	5	0.54612
FBgn0265632	6	0.99721	0.99718	0.999157	15594	0	0.6407	0.0099079	0.038226	0.992403	538	5	0.6407
FBgn0266096	4	0.99001	0.99002	0.999085	15474	0	0.47107	0.0099913	0.033335	0.992403	539	4	0.47107
FBgn0040496	6	0.95583	0.95578	0.998342	14955	0	0.50983	0.010011	0.038594	0.992403	540	5	0.50983
FBgn0031266	6	0.097739	0.22722	0.979758	3411	1	0.44067	0.010035	0.038684	0.992403	541	5	0.44067
FBgn0259193	6	0.14792	0.3	0.979758	4533	3	0.16231	0.010051	0.038739	0.992403	542	3	0.16231
FBgn0267281	4	0.9802	0.98019	0.999085	15326	0	0.80801	0.010069	0.033555	0.992403	543	3	0.80801
FBgn0259960	6	0.95715	0.9571	0.998342	14975	0	0.31965	0.010075	0.038817	0.992403	544	3	0.31965
FBgn0260940	6	0.81221	0.82646	0.989455	12909	1	0.27819	0.010075	0.038817	0.992403	545	3	0.27819
FBgn0259682	6	0.99437	0.99439	0.999085	15550	0	0.50571	0.010075	0.038817	0.992403	546	5	0.50571
FBgn0011741	6	0.22779	0.41033	0.979758	6091	1	-0.31823	0.010075	0.038817	0.992403	547	2	-0.31823
FBgn0266410	6	0.76976	0.80046	0.989455	12411	1	0.89607	0.010097	0.038897	0.992403	548	4	0.89607
FBgn0005564	6	0.94011	0.94001	0.998342	14684	0	0.92969	0.010097	0.038897	0.992403	549	4	0.92969
FBgn0034782	6	0.72019	0.77487	0.989455	11901	1	0.68135	0.010097	0.038897	0.992403	550	4	0.68135
FBgn0032026	6	0.95497	0.95493	0.998342	14935	0	0.44917	0.010146	0.039061	0.992403	551	5	0.44917
FBgn0267351	4	0.076554	0.17044	0.967275	2863	2	-0.3065	0.010159	0.033851	0.992403	552	1	-0.3065
FBgn0267165	4	0.77206	0.77141	0.989455	12437	0	1.0308	0.010251	0.034066	0.992403	553	2	1.0308
FBgn0035674	4	0.24103	0.36583	0.979758	6288	2	-0.3927	0.010277	0.034123	0.992403	554	1	-0.3927
FBgn0267949	4	0.33711	0.47484	0.986685	7890	1	-0.089925	0.010277	0.034123	0.992403	555	1	-0.089925
FBgn0039070	6	0.83382	0.84159	0.989455	13160	1	0.11507	0.010331	0.039716	0.992403	556	2	0.11507
FBgn0036364	4	0.18444	0.30139	0.979758	5288	1	0.8371	0.010364	0.034318	0.992403	557	3	0.8371
FBgn0267185	4	0.20268	0.3222	0.979758	5631	1	0.83303	0.01037	0.03433	0.992403	558	3	0.83303
FBgn0002022	6	0.043132	0.12249	0.967275	1851	4	-0.55625	0.010395	0.039947	0.992403	559	2	-0.55625
FBgn0032160	6	0.98023	0.98027	0.999085	15327	0	0.31743	0.010395	0.039947	0.992403	560	3	0.31743
FBgn0042179	6	0.07278	0.18951	0.979758	2793	1	0.31163	0.010395	0.039947	0.992403	561	3	0.31163
FBgn0283427	6	0.95553	0.95549	0.998342	14950	0	0.38602	0.010408	0.039991	0.992403	562	5	0.38602
FBgn0037792	2	0.98958	0.98943	0.999085	15468	0	0.83021	0.010422	0.01957	0.992403	563	2	0.83021
FBgn0260462	6	0.9173	0.91696	0.998342	14346	0	0.44073	0.010423	0.04004	0.992403	564	4	0.44073
FBgn0040383	6	0.4074	0.56968	0.988564	8631	2	-0.14738	0.010437	0.0401	0.992403	565	2	-0.14738
FBgn0027560	6	0.56464	0.70191	0.988564	10531	2	0.13491	0.010504	0.040327	0.992403	566	3	0.13491
FBgn0260753	8	0.85535	0.8878	0.998342	13452	1	0.44404	0.010533	0.044614	0.992403	567	6	0.44404
FBgn0031491	4	0.31972	0.45512	0.986685	7571	1	0.52156	0.010536	0.034681	0.992403	568	2	0.52156
FBgn0016080	6	0.028584	0.087549	0.951196	1341	4	-0.37881	0.010543	0.040468	0.992403	569	2	-0.37881
FBgn0264679	4	0.14426	0.25523	0.979758	4457	1	0.1253	0.010545	0.034697	0.992403	570	2	0.1253
FBgn0036480	6	0.71356	0.77175	0.989455	11832	1	0.5102	0.010572	0.040574	0.992403	571	4	0.5102
FBgn0039257	6	0.0055139	0.022448	0.926279	343	2	0.57789	0.010572	0.040574	0.992403	572	4	0.57789
FBgn0030659	5	0.021532	0.066727	0.950637	1073	1	0.48111	0.010606	0.036059	0.992403	573	4	0.48111
FBgn0263587	4	0.87187	0.87148	0.989455	13559	0	0.70696	0.01061	0.034844	0.992403	574	3	0.70696
FBgn0053140	6	0.67681	0.75558	0.989455	11507	1	0.46712	0.010628	0.040778	0.992403	575	4	0.46712
FBgn0010391	6	0.14058	0.28966	0.979758	4376	2	0.42904	0.010649	0.040851	0.992403	576	4	0.42904
FBgn0033945	6	0.20666	0.38187	0.979758	5709	3	0.12001	0.010658	0.040892	0.992403	577	3	0.12001
FBgn0000299	6	0.31369	0.49507	0.988564	7494	1	0.69063	0.01066	0.040897	0.992403	578	4	0.69063
FBgn0037941	6	0.98182	0.98185	0.999085	15349	0	0.48152	0.010688	0.041007	0.992403	579	5	0.48152
FBgn0017572	6	0.83053	0.83918	0.989455	13127	1	0.63925	0.010688	0.041007	0.992403	580	5	0.63925
FBgn0085188	6	0.93793	0.93787	0.998342	14654	0	0.55359	0.010688	0.041007	0.992403	581	5	0.55359
FBgn0267565	4	0.082733	0.18221	0.97756	3076	1	1.056	0.010788	0.035248	0.992403	582	3	1.056
FBgn0037129	6	0.87515	0.8755	0.989455	13607	1	0.36306	0.010811	0.04145	0.992403	583	5	0.36306
FBgn0034716	6	0.97604	0.97609	0.999085	15265	0	0.41491	0.010817	0.041473	0.992403	584	4	0.41491
FBgn0038752	6	0.87515	0.8755	0.989455	13658	1	0.588	0.010817	0.041473	0.992403	585	4	0.588
FBgn0033673	6	0.077459	0.19661	0.979758	2884	2	0.16371	0.010817	0.041473	0.992403	586	3	0.16371
FBgn0034325	6	0.56464	0.70191	0.988564	10360	2	-0.2015	0.010817	0.041473	0.992403	587	2	-0.2015
FBgn0086757	6	0.74051	0.78487	0.989455	12049	1	-0.23886	0.010826	0.041504	0.992403	588	2	-0.23886
FBgn0040251	5	0.19016	0.34546	0.979758	5386	2	0.7031	0.010887	0.03687	0.992403	589	3	0.7031
FBgn0029751	6	0.8977	0.89749	0.998342	14045	0	0.2885	0.010888	0.041713	0.992403	590	4	0.2885
FBgn0265649	4	0.0067574	0.023049	0.926279	416	1	-0.171	0.01089	0.035473	0.992403	591	1	-0.171
FBgn0019886	4	0.80115	0.80065	0.989455	12780	0	1.1418	0.01089	0.035473	0.992403	592	3	1.1418
FBgn0040651	6	0.9537	0.95365	0.998342	14902	0	0.23964	0.010896	0.041742	0.992403	593	3	0.23964
FBgn0026196	6	0.25417	0.44558	0.986685	6684	1	0.5606	0.010905	0.041772	0.992403	594	3	0.5606
FBgn0037924	6	0.53923	0.67973	0.988564	10092	1	0.38836	0.010905	0.041772	0.992403	595	3	0.38836
FBgn0037270	6	0.92037	0.92005	0.998342	14394	0	0.076608	0.010928	0.041847	0.992403	596	2	0.076608
FBgn0051183	5	0.93356	0.9337	0.998342	14583	0	0.59997	0.010953	0.037075	0.992403	597	3	0.59997
FBgn0262801	6	0.22127	0.40155	0.979758	5992	1	0.46428	0.010995	0.042087	0.992403	598	4	0.46428
FBgn0033224	4	0.89766	0.89725	0.998342	14043	0	0.57588	0.011032	0.035785	0.992403	599	2	0.57588
FBgn0004854	6	0.56464	0.70191	0.988564	10388	2	0.3529	0.011038	0.042243	0.992403	600	3	0.3529
FBgn0026563	6	0.71539	0.77265	0.989455	11839	1	-0.18624	0.011108	0.042503	0.992403	601	1	-0.18624
FBgn0040260	6	0.81221	0.82646	0.989455	12904	1	0.61469	0.011109	0.042505	0.992403	602	4	0.61469
FBgn0039897	8	0.66766	0.79448	0.989455	11427	2	-0.12793	0.011118	0.046813	0.992403	603	1	-0.12793
FBgn0026174	6	0.99469	0.9947	0.999085	15553	0	0.57158	0.011131	0.042587	0.992403	604	5	0.57158
FBgn0050087	6	0.90374	0.90349	0.998342	14144	0	0.60003	0.011131	0.042587	0.992403	605	5	0.60003
FBgn0267590	4	0.28663	0.41752	0.979758	7124	2	0.56468	0.011132	0.036023	0.992403	606	2	0.56468
FBgn0022702	4	0.21987	0.34191	0.979758	5973	1	0.5735	0.011149	0.036061	0.992403	607	2	0.5735
FBgn0263777	5	0.99165	0.99172	0.999085	15506	0	0.52857	0.011164	0.037714	0.992403	608	4	0.52857
FBgn0034094	6	0.72019	0.77487	0.989455	11903	1	0.46288	0.011178	0.042776	0.992403	609	3	0.46288
FBgn0034996	6	0.64828	0.74381	0.989455	11279	1	0.43151	0.011179	0.042777	0.992403	610	3	0.43151
FBgn0030545	6	0.29966	0.48421	0.988564	7297	1	0.43405	0.011221	0.042912	0.992403	611	5	0.43405
FBgn0032694	6	0.72019	0.77487	0.989455	11899	1	0.30553	0.011238	0.042964	0.992403	612	5	0.30553
FBgn0263231	6	0.23401	0.41871	0.979758	6180	1	0.67613	0.011242	0.042979	0.992403	613	3	0.67613
FBgn0028563	6	0.72829	0.77876	0.989455	11972	1	0.36384	0.011265	0.043069	0.992403	614	5	0.36384
FBgn0026394	6	0.45964	0.61246	0.988564	9202	2	0.19931	0.011319	0.043239	0.992403	615	2	0.19931
FBgn0266406	4	0.95588	0.95566	0.998342	14957	0	0.59332	0.011338	0.036479	0.992403	616	2	0.59332
FBgn0037172	6	0.91317	0.91286	0.998342	14285	0	0.62528	0.011364	0.043424	0.992403	617	4	0.62528
FBgn0262081	8	0.99419	0.99416	0.999085	15547	0	0.20119	0.011414	0.047966	0.992403	618	4	0.20119
FBgn0033187	6	0.90124	0.90103	0.998342	14102	0	0.4409	0.01142	0.043607	0.992403	619	5	0.4409
FBgn0036391	6	0.19153	0.36114	0.979758	5414	3	-0.1	0.011426	0.043633	0.992403	620	2	-0.1
FBgn0030886	6	0.038146	0.11071	0.967068	1696	3	-0.18542	0.011426	0.043633	0.992403	621	3	-0.18542
FBgn0036522	6	0.71356	0.77175	0.989455	11829	1	0.30928	0.011426	0.043633	0.992403	622	3	0.30928
FBgn0036886	4	0.060303	0.13845	0.967275	2363	2	-0.12948	0.011432	0.036675	0.992403	623	1	-0.12948
FBgn0038945	6	0.5587	0.6967	0.988564	10227	1	0.53372	0.011447	0.043701	0.992403	624	4	0.53372
FBgn0023097	1	0.98855	0.98865	0.999085	15449	0	0.88989	0.011451	0.011391	0.992403	625	1	0.88989
FBgn0002775	4	0.043899	0.10534	0.963993	1874	1	0.68681	0.011456	0.036725	0.992403	626	3	0.68681
FBgn0034156	6	0.95159	0.95147	0.998342	14870	0	0.38178	0.011463	0.043759	0.992403	627	5	0.38178
FBgn0052600	6	0.99688	0.99686	0.999157	15589	0	0.38098	0.011463	0.043759	0.992403	628	5	0.38098
FBgn0035988	6	0.093772	0.22119	0.979758	3320	2	0.00063178	0.011483	0.043823	0.992403	629	3	0.00063178
FBgn0031659	6	0.93589	0.93578	0.998342	14618	0	0.59945	0.0115	0.043882	0.992403	630	5	0.59945
FBgn0263617	6	0.39765	0.5618	0.988564	8544	2	0.35113	0.011541	0.044011	0.992403	631	3	0.35113
FBgn0050403	6	0.99235	0.9924	0.999085	15518	0	0.51585	0.011544	0.04402	0.992403	632	5	0.51585
FBgn0002535	6	0.77046	0.80085	0.989455	12417	1	0.69376	0.011565	0.044094	0.992403	633	4	0.69376
FBgn0033751	6	0.20383	0.37805	0.979758	5652	1	-0.22629	0.011603	0.04423	0.992403	634	2	-0.22629
FBgn0029594	7	0.5577	0.70495	0.989455	10217	2	0.53628	0.01163	0.045347	0.992403	635	5	0.53628
FBgn0031747	6	0.37122	0.54043	0.988564	8237	1	0.557	0.011662	0.044442	0.992403	636	5	0.557
FBgn0034403	6	0.34083	0.5164	0.988564	7924	1	0.26698	0.011674	0.044484	0.992403	637	4	0.26698
FBgn0034736	6	0.87515	0.8755	0.989455	13618	1	0.29253	0.011683	0.044513	0.992403	638	5	0.29253
FBgn0026323	6	0.42792	0.58639	0.988564	8818	2	0.35797	0.011696	0.044547	0.992403	639	3	0.35797
FBgn0040395	6	0.83344	0.84131	0.989455	13159	1	0.52204	0.011727	0.044656	0.992403	640	4	0.52204
FBgn0037698	6	0.89117	0.89104	0.998342	13942	0	0.64875	0.011762	0.044774	0.992403	641	4	0.64875
FBgn0054031	6	0.89501	0.89483	0.998342	13999	0	0.63207	0.011762	0.044774	0.992403	642	4	0.63207
FBgn0038043	6	0.29434	0.48018	0.988564	7232	1	0.2774	0.011846	0.045062	0.992403	643	3	0.2774
FBgn0259229	6	0.95064	0.9505	0.998342	14856	0	0.67399	0.011878	0.045176	0.992403	644	4	0.67399
FBgn0036923	6	0.13961	0.2883	0.979758	4350	2	0.28319	0.011885	0.045195	0.992403	645	3	0.28319
FBgn0000147	5	0.45739	0.6019	0.988564	9151	2	0.33425	0.011888	0.03978	0.992403	646	3	0.33425
FBgn0031460	6	0.49277	0.64003	0.988564	9564	1	0.84194	0.011921	0.045328	0.992403	647	4	0.84194
FBgn0013548	6	0.32855	0.50676	0.988564	7678	2	0.66048	0.011921	0.045328	0.992403	648	4	0.66048
FBgn0053111	2	0.98807	0.9879	0.999085	15439	0	1.1786	0.01193	0.022448	0.992403	649	2	1.1786
FBgn0029932	6	0.58176	0.71703	0.989455	10724	1	0.154	0.011956	0.045439	0.992403	650	2	0.154
FBgn0039203	6	0.9937	0.9937	0.999085	15538	0	0.35777	0.011956	0.04544	0.992403	651	5	0.35777
FBgn0036227	6	0.053873	0.14732	0.967275	2186	1	0.43801	0.011956	0.04544	0.992403	652	5	0.43801
FBgn0035477	5	0.46993	0.61431	0.988564	9316	1	0.72618	0.011988	0.040086	0.992403	653	4	0.72618
FBgn0052537	6	0.465	0.61688	0.988564	9273	1	0.61579	0.012001	0.045595	0.992403	654	4	0.61579
FBgn0265747	4	0.065479	0.14881	0.967275	2611	2	0.12432	0.012003	0.037918	0.992403	655	2	0.12432
FBgn0267178	4	0.63949	0.6579	0.988564	11180	1	0.75606	0.012008	0.037933	0.992403	656	3	0.75606
FBgn0032472	6	0.77602	0.804	0.989455	12477	1	0.30052	0.012051	0.045768	0.992403	657	5	0.30052
FBgn0262575	6	0.44542	0.60062	0.988564	9015	1	0.16091	0.012097	0.04593	0.992403	658	2	0.16091
FBgn0053460	6	0.99263	0.99267	0.999085	15523	0	0.45341	0.012118	0.04601	0.992403	659	5	0.45341
FBgn0003116	6	0.91769	0.91735	0.998342	14352	0	0.65253	0.012144	0.046086	0.992403	660	4	0.65253
FBgn0034391	6	0.77046	0.80085	0.989455	12415	1	0.59991	0.012168	0.046181	0.992403	661	4	0.59991
FBgn0028406	4	0.71542	0.7181	0.989455	11845	1	0.3213	0.01219	0.038322	0.992403	662	2	0.3213
FBgn0000406	6	0.077459	0.19661	0.979758	2885	2	0.15737	0.012209	0.04634	0.992403	663	3	0.15737
FBgn0261085	6	0.093499	0.22078	0.979758	3313	2	0.36485	0.012226	0.046409	0.992403	664	3	0.36485
FBgn0053493	6	0.90561	0.90534	0.998342	14178	0	0.42334	0.012284	0.046612	0.992403	665	3	0.42334
FBgn0034005	6	0.99479	0.99481	0.999085	15556	0	0.46847	0.012292	0.046636	0.992403	666	5	0.46847
FBgn0038816	7	0.11536	0.27374	0.979758	3803	3	-0.3604	0.012304	0.047541	0.992403	667	2	-0.3604
FBgn0031335	5	0.017467	0.055414	0.950637	897	1	0.25582	0.012335	0.0411	0.992403	668	4	0.25582
FBgn0030905	6	0.10195	0.23342	0.979758	3500	2	0.40687	0.012343	0.04682	0.992403	669	4	0.40687
FBgn0030556	6	0.47623	0.62614	0.988564	9387	1	0.19829	0.012344	0.046821	0.992403	670	3	0.19829
FBgn0250814	6	0.9655	0.96556	0.998342	15108	0	0.2679	0.012344	0.046821	0.992403	671	2	0.2679
FBgn0030617	6	0.97989	0.97993	0.999085	15317	0	0.72541	0.012344	0.046821	0.992403	672	4	0.72541
FBgn0037073	6	0.45353	0.60738	0.988564	9105	1	0.44537	0.01239	0.046972	0.992403	673	4	0.44537
FBgn0035482	6	0.05554	0.15114	0.967275	2238	1	0.6523	0.012403	0.047022	0.992403	674	5	0.6523
FBgn0040318	6	0.16595	0.32544	0.979758	4927	3	-0.25128	0.01244	0.047145	0.992403	675	2	-0.25128
FBgn0021796	4	0.22072	0.34282	0.979758	5981	2	0.22828	0.012444	0.038901	0.992403	676	2	0.22828
FBgn0019925	6	0.48969	0.63741	0.988564	9534	2	0.5066	0.012452	0.047188	0.992403	677	3	0.5066
FBgn0023524	6	0.97342	0.97348	0.998526	15232	0	0.43181	0.012571	0.047613	0.992403	678	3	0.43181
FBgn0261841	2	0.98742	0.98727	0.999085	15431	0	0.72885	0.012576	0.023646	0.992403	679	2	0.72885
FBgn0029649	6	0.90926	0.90893	0.998342	14227	0	0.27714	0.012624	0.047788	0.992403	680	5	0.27714
FBgn0031171	6	0.44131	0.59734	0.988564	8973	2	0.056739	0.012683	0.047966	0.992403	681	2	0.056739
FBgn0262535	6	0.25098	0.44141	0.986685	6643	2	0.4392	0.012695	0.048007	0.992403	682	4	0.4392
FBgn0040087	6	0.24289	0.43067	0.979758	6492	3	0.024247	0.012723	0.048102	0.992403	683	3	0.024247
FBgn0051777	6	0.76563	0.79819	0.989455	12384	1	-0.018896	0.012732	0.048133	0.992403	684	2	-0.018896
FBgn0052282	6	0.75633	0.7931	0.989455	12306	1	0.63241	0.012743	0.048161	0.992403	685	4	0.63241
FBgn0032771	6	0.99721	0.99718	0.999157	15596	0	0.50874	0.012748	0.04818	0.992403	686	3	0.50874
FBgn0265813	4	0.21856	0.34042	0.979758	5949	2	0.38029	0.01276	0.039611	0.992403	687	2	0.38029
FBgn0040699	6	0.79729	0.81681	0.989455	12732	1	0.6209	0.012764	0.048234	0.992403	688	3	0.6209
FBgn0000635	6	0.56464	0.70191	0.988564	10541	2	0.32564	0.012803	0.048369	0.992403	689	3	0.32564
FBgn0000100	3	0.98717	0.9873	0.999085	15423	0	0.62127	0.01283	0.034043	0.992403	690	3	0.62127
FBgn0015561	6	0.024387	0.077092	0.950637	1179	1	0.43014	0.01283	0.048469	0.992403	691	5	0.43014
FBgn0267664	4	0.21532	0.33672	0.979758	5902	2	0.17886	0.012831	0.039761	0.992403	692	2	0.17886
FBgn0267983	4	0.58901	0.6229	0.988564	10774	1	0.6672	0.012845	0.039803	0.992403	693	3	0.6672
FBgn0267975	6	0.055268	0.15052	0.967275	2230	1	0.58478	0.01287	0.048606	0.992403	694	3	0.58478
FBgn0038300	4	0.33711	0.47484	0.986685	7891	1	0.34056	0.01293	0.039998	0.992403	695	2	0.34056
FBgn0266027	4	0.46634	0.55012	0.988564	9280	1	0.89474	0.012986	0.040136	0.992403	696	2	0.89474
FBgn0031117	6	0.1425	0.2923	0.979758	4419	2	0.24025	0.01305	0.049215	0.992403	697	3	0.24025
FBgn0039727	6	0.3443	0.51913	0.988564	7969	2	0.50213	0.013051	0.04922	0.992403	698	4	0.50213
FBgn0263019	4	0.5722	0.61197	0.988564	10640	1	0.98903	0.01306	0.040302	0.992403	699	3	0.98903
FBgn0087012	6	0.98234	0.98236	0.999085	15361	0	0.6225	0.013076	0.049309	0.992403	700	5	0.6225
FBgn0022700	6	0.31987	0.49984	0.988564	7573	1	0.49912	0.0131	0.04939	0.992403	701	5	0.49912
FBgn0260475	1	0.9869	0.98697	0.999085	15419	0	1.4784	0.013103	0.013001	0.992403	702	1	1.4784
FBgn0036449	4	0.75019	0.74998	0.989455	12216	1	0.53729	0.013147	0.040495	0.992403	703	2	0.53729
FBgn0029067	6	0.82914	0.83815	0.989455	13111	1	-0.016809	0.013174	0.049652	0.992403	704	2	-0.016809
FBgn0034961	2	0.98683	0.98671	0.999085	15416	0	0.64654	0.013175	0.02473	0.992403	705	2	0.64654
FBgn0035082	6	0.2961	0.48153	0.988564	7255	1	0.13354	0.013203	0.049742	0.992403	706	3	0.13354
FBgn0029965	5	0.94986	0.95	0.998342	14839	0	0.72516	0.013206	0.043631	0.992403	707	4	0.72516
FBgn0037933	6	0.13437	0.28083	0.979758	4251	2	0.13721	0.013226	0.049811	0.992403	708	3	0.13721
FBgn0261625	12	0.10711	0.3028	0.979758	3627	6	-0.5943	0.013254	0.06369	0.992403	709	3	-0.5943
FBgn0028956	7	0.49559	0.66118	0.988564	9596	1	0.49454	0.013257	0.050575	0.992403	710	4	0.49454
FBgn0266359	4	0.15528	0.26796	0.979758	4707	2	0.094394	0.013292	0.040824	0.992403	711	2	0.094394
FBgn0267142	4	0.14965	0.26141	0.979758	4567	2	-0.29988	0.013292	0.040824	0.992403	712	1	-0.29988
FBgn0039705	8	0.99985	0.99985	1	15620	0	0.31516	0.01333	0.055126	0.992403	713	6	0.31516
FBgn0052029	6	0.87515	0.8755	0.989455	13641	1	0.59791	0.01333	0.050179	0.992403	714	4	0.59791
FBgn0263216	6	0.53996	0.68036	0.988564	10098	1	0.5005	0.013342	0.050221	0.992403	715	5	0.5005
FBgn0039189	6	0.98628	0.9863	0.999085	15411	0	0.60253	0.013342	0.050221	0.992403	716	5	0.60253
FBgn0052250	6	0.87515	0.8755	0.989455	13608	1	0.57833	0.013394	0.050394	0.992403	717	5	0.57833
FBgn0036878	5	0.74925	0.76365	0.989455	12103	1	0.24361	0.013417	0.044227	0.992403	718	2	0.24361
FBgn0017448	4	0.55848	0.60335	0.988564	10226	1	0.53041	0.013424	0.041107	0.992403	719	2	0.53041
FBgn0029750	6	0.96666	0.96672	0.998417	15127	0	0.42329	0.013431	0.050529	0.992403	720	5	0.42329
FBgn0046323	6	0.93288	0.9327	0.998342	14573	0	0.25374	0.013468	0.05065	0.992403	721	5	0.25374
FBgn0004573	6	0.26268	0.4558	0.986685	6813	1	0.45156	0.013481	0.050686	0.992403	722	5	0.45156
FBgn0038115	6	0.7539	0.79179	0.989455	12285	1	0.57841	0.013501	0.050753	0.992403	723	4	0.57841
FBgn0259202	5	0.9415	0.94169	0.998342	14702	0	0.63289	0.013524	0.044552	0.992403	724	4	0.63289
FBgn0042198	6	0.85041	0.85422	0.989455	13378	1	0.39733	0.013575	0.051013	0.992403	725	4	0.39733
FBgn0035817	6	0.35484	0.52742	0.988564	8078	1	0.2396	0.013636	0.051214	0.992403	726	3	0.2396
FBgn0040298	4	0.66702	0.67845	0.988564	11424	1	0.5782	0.013686	0.04169	0.992403	727	3	0.5782
FBgn0014073	6	0.57943	0.71498	0.989455	10697	1	0.62527	0.013686	0.051384	0.992403	728	4	0.62527
FBgn0037827	6	0.03831	0.11108	0.967275	1701	2	0.76259	0.013688	0.051386	0.992403	729	4	0.76259
FBgn0038320	6	0.035504	0.10441	0.963993	1589	4	-0.38182	0.01372	0.051493	0.992403	730	2	-0.38182
FBgn0028886	6	0.87515	0.8755	0.989455	13603	1	0.39893	0.013723	0.0515	0.992403	731	4	0.39893
FBgn0035743	6	0.56464	0.70191	0.988564	10287	2	-0.15494	0.013723	0.0515	0.992403	732	2	-0.15494
FBgn0264378	4	0.65778	0.67144	0.988564	11361	1	0.41067	0.013739	0.041805	0.992403	733	2	0.41067
FBgn0265658	4	0.70388	0.70813	0.989455	11735	1	1.0104	0.013786	0.041897	0.992403	734	2	1.0104
FBgn0033665	6	0.92516	0.92498	0.998342	14459	0	0.012856	0.01379	0.051718	0.992403	735	1	0.012856
FBgn0003386	3	0.98587	0.98598	0.999085	15405	0	1.4413	0.013805	0.036412	0.992403	736	3	1.4413
FBgn0267172	3	0.20728	0.31891	0.979758	5731	2	-0.95222	0.013859	0.03655	0.992403	737	1	-0.95222
FBgn0039498	6	0.031807	0.095417	0.962982	1469	4	-0.3708	0.013861	0.051946	0.992403	738	1	-0.3708
FBgn0043002	6	0.96117	0.96121	0.998342	15031	0	0.33778	0.013899	0.052069	0.992403	739	5	0.33778
FBgn0011297	6	0.98442	0.98447	0.999085	15382	0	0.57985	0.013899	0.052069	0.992403	740	5	0.57985
FBgn0053642	6	0.27603	0.46612	0.986685	6977	2	0.2954	0.013931	0.052166	0.992403	741	3	0.2954
FBgn0085474	6	0.058155	0.15712	0.967275	2309	2	0.48553	0.014002	0.052415	0.992403	742	3	0.48553
FBgn0004427	6	0.9486	0.94846	0.998342	14811	0	0.51821	0.014012	0.052451	0.992403	743	3	0.51821
FBgn0262943	4	0.95137	0.95119	0.998342	14867	0	0.66903	0.014016	0.042441	0.992403	744	3	0.66903
FBgn0259702	6	0.93955	0.93945	0.998342	14675	0	0.48841	0.014046	0.052586	0.992403	745	5	0.48841
FBgn0035762	4	0.59372	0.62607	0.988564	10812	1	1.0212	0.014057	0.042535	0.992403	746	3	1.0212
FBgn0032132	6	0.027497	0.084868	0.950637	1292	2	-0.060332	0.014072	0.052664	0.992403	747	3	-0.060332
FBgn0050052	6	0.92366	0.92346	0.998342	14434	0	0.40296	0.014084	0.052709	0.992403	748	5	0.40296
FBgn0265979	4	0.97215	0.9719	0.998526	15212	0	0.55094	0.014093	0.042621	0.992403	749	3	0.55094
FBgn0033640	6	0.28077	0.4698	0.986685	7050	1	-0.10435	0.014143	0.052897	0.992403	750	1	-0.10435
FBgn0037556	6	0.40621	0.56872	0.988564	8623	2	0.058542	0.014152	0.05293	0.992403	751	2	0.058542
FBgn0015001	6	0.99207	0.99211	0.999085	15510	0	0.3389	0.014197	0.053082	0.992403	752	5	0.3389
FBgn0038476	8	0.6648	0.79261	0.989455	11407	1	-0.065111	0.014198	0.058342	0.992403	753	3	-0.065111
FBgn0003733	6	0.17901	0.34384	0.979758	5179	1	0.15512	0.014217	0.053153	0.992403	754	3	0.15512
FBgn0030777	6	0.54405	0.68401	0.988564	10124	1	0.53382	0.014237	0.053232	0.992403	755	4	0.53382
FBgn0031118	6	0.062989	0.16793	0.967275	2437	2	-0.21688	0.014248	0.053269	0.992403	756	2	-0.21688
FBgn0034623	6	0.28757	0.47501	0.986685	7138	2	0.089633	0.014287	0.053379	0.992403	757	2	0.089633
FBgn0052463	6	0.87515	0.8755	0.989455	13599	1	0.65867	0.01432	0.053454	0.992403	758	4	0.65867
FBgn0267546	4	0.89679	0.89638	0.998342	14027	0	0.59928	0.014359	0.043226	0.992403	759	2	0.59928
FBgn0030082	4	0.91225	0.912	0.998342	14272	0	0.46909	0.014372	0.043258	0.992403	760	3	0.46909
FBgn0010431	6	0.22575	0.40751	0.979758	6061	2	0.085363	0.014389	0.053634	0.992403	761	2	0.085363
FBgn0034510	5	0.37855	0.52464	0.988564	8319	2	0.30026	0.014452	0.047229	0.992403	762	2	0.30026
FBgn0030932	6	0.48979	0.6375	0.988564	9536	1	0.21642	0.014459	0.053829	0.992403	763	3	0.21642
FBgn0039561	6	0.40528	0.56798	0.988564	8610	2	0.3807	0.01452	0.053968	0.992403	764	3	0.3807
FBgn0002945	6	0.85092	0.85462	0.989455	13386	1	0.17526	0.014551	0.054053	0.992403	765	2	0.17526
FBgn0033268	6	0.92921	0.92905	0.998342	14507	0	0.50871	0.014551	0.054053	0.992403	766	3	0.50871
FBgn0040843	6	0.6112	0.72974	0.989455	10943	1	0.44024	0.014564	0.05409	0.992403	767	4	0.44024
FBgn0039668	6	0.92509	0.92492	0.998342	14458	0	0.47236	0.014564	0.05409	0.992403	768	3	0.47236
FBgn0037078	6	0.93589	0.93578	0.998342	14621	0	0.079242	0.014636	0.054281	0.992403	769	1	0.079242
FBgn0266100	8	0.38723	0.60219	0.988564	8419	3	-0.13264	0.01469	0.060137	0.992403	770	1	-0.13264
FBgn0050125	6	0.038689	0.11198	0.967275	1716	3	-0.0013147	0.014698	0.05444	0.992403	771	3	-0.0013147
FBgn0037960	5	0.1367	0.27561	0.979758	4298	1	0.83782	0.014699	0.047938	0.992403	772	4	0.83782
FBgn0035321	6	0.0032243	0.013804	0.914045	224	2	0.03631	0.014706	0.05446	0.992403	773	2	0.03631
FBgn0032284	6	0.55446	0.69301	0.988564	10195	1	0.1216	0.014777	0.054642	0.992403	774	1	0.1216
FBgn0265961	4	0.89653	0.89611	0.998342	14024	0	0.74234	0.014803	0.044234	0.992403	775	3	0.74234
FBgn0266116	4	0.82103	0.8205	0.989455	13013	0	0.95432	0.01485	0.044349	0.992403	776	3	0.95432
FBgn0033752	6	0.9397	0.93961	0.998342	14678	0	0.45404	0.014865	0.0549	0.992403	777	4	0.45404
FBgn0032096	6	0.74903	0.78927	0.989455	12102	1	0.3322	0.014909	0.055014	0.992403	778	3	0.3322
FBgn0039876	6	0.045408	0.12779	0.967275	1914	4	-0.3162	0.014917	0.055029	0.992403	779	1	-0.3162
FBgn0053723	6	0.13932	0.28788	0.979758	4346	3	-0.20135	0.014934	0.05507	0.992403	780	2	-0.20135
FBgn0016687	3	0.44328	0.4781	0.987608	8996	1	0.65202	0.014942	0.039231	0.992403	781	2	0.65202
FBgn0033286	6	0.56464	0.70191	0.988564	10350	2	0.1873	0.014988	0.055199	0.992403	782	2	0.1873
FBgn0032078	6	0.35295	0.52592	0.988564	8058	1	0.5178	0.015009	0.055233	0.992403	783	4	0.5178
FBgn0052756	6	0.94374	0.94357	0.998342	14736	0	0.77459	0.015012	0.055243	0.992403	784	4	0.77459
FBgn0038588	5	0.99656	0.99655	0.999157	15581	0	0.52443	0.015033	0.048848	0.992403	785	4	0.52443
FBgn0003886	6	0.33285	0.51006	0.988564	7719	2	0.49529	0.015058	0.055354	0.992403	786	3	0.49529
FBgn0050357	6	0.33989	0.51566	0.988564	7918	2	0.58063	0.015071	0.055395	0.992403	787	4	0.58063
FBgn0030541	6	0.40977	0.57157	0.988564	8655	1	0.15852	0.015129	0.055534	0.992403	788	2	0.15852
FBgn0259113	6	0.087381	0.21164	0.979758	3185	1	0.54755	0.015145	0.055572	0.992403	789	4	0.54755
FBgn0029128	8	0.60198	0.75269	0.989455	10882	1	-0.036569	0.015206	0.061974	0.992403	790	2	-0.036569
FBgn0034035	6	0.06997	0.18344	0.979094	2720	2	0.35306	0.015228	0.055779	0.992403	791	4	0.35306
FBgn0023514	6	0.021099	0.068804	0.950637	1054	1	0.20686	0.015344	0.05605	0.992403	792	3	0.20686
FBgn0029657	6	0.92634	0.92616	0.998342	14480	0	0.61505	0.015357	0.056089	0.992403	793	4	0.61505
FBgn0029658	6	0.24112	0.42828	0.979758	6289	2	0.64339	0.015357	0.056089	0.992403	794	4	0.64339
FBgn0035420	6	0.077958	0.19738	0.979758	2899	2	0.19599	0.015416	0.056231	0.992403	795	3	0.19599
FBgn0030030	6	0.73964	0.78439	0.989455	12044	1	0.40677	0.015416	0.056231	0.992403	796	3	0.40677
FBgn0262359	5	0.47406	0.6184	0.988564	9361	1	0.36708	0.015472	0.050106	0.992403	797	3	0.36708
FBgn0028507	6	0.13826	0.28631	0.979758	4323	3	-0.16663	0.015489	0.056414	0.992403	798	2	-0.16663
FBgn0053302	6	0.84819	0.85248	0.989455	13345	1	0.6227	0.015498	0.056437	0.992403	799	4	0.6227
FBgn0260936	6	0.96624	0.96633	0.998354	15122	0	0.69071	0.015499	0.056444	0.992403	800	4	0.69071
FBgn0034128	6	0.96946	0.96956	0.998471	15164	0	0.86505	0.015502	0.056451	0.992403	801	4	0.86505
FBgn0040737	6	0.99085	0.99087	0.999085	15492	0	0.49454	0.015502	0.056451	0.992403	802	3	0.49454
FBgn0266250	4	0.10857	0.21433	0.979758	3659	1	0.92364	0.015529	0.045888	0.992403	803	3	0.92364
FBgn0267615	4	0.55119	0.59887	0.988564	10175	1	0.31095	0.015573	0.045993	0.992403	804	2	0.31095
FBgn0034839	6	0.35159	0.52486	0.988564	8049	1	0.48722	0.01558	0.056623	0.992403	805	4	0.48722
FBgn0262876	6	0.055732	0.15157	0.967275	2242	2	0.36412	0.01559	0.056652	0.992403	806	4	0.36412
FBgn0051922	6	0.23524	0.42038	0.979758	6204	1	0.46185	0.015601	0.056672	0.992403	807	4	0.46185
FBgn0034822	6	0.10045	0.23125	0.979758	3467	2	0.45599	0.015625	0.056733	0.992403	808	3	0.45599
FBgn0004047	6	0.97748	0.97757	0.999085	15285	0	0.37727	0.015627	0.056736	0.992403	809	4	0.37727
FBgn0010786	6	0.6112	0.72974	0.989455	10942	1	0.44534	0.015642	0.056782	0.992403	810	4	0.44534
FBgn0264542	7	0.62149	0.75268	0.989455	11035	2	-0.087908	0.01566	0.058021	0.992403	811	2	-0.087908
FBgn0266115	4	0.88684	0.88636	0.997704	13903	0	0.63634	0.015691	0.046247	0.992403	812	3	0.63634
FBgn0011802	3	0.78779	0.7876	0.989455	12612	0	0.18619	0.015712	0.041153	0.992403	813	1	0.18619
FBgn0039180	5	0.080805	0.18223	0.97756	3024	3	-0.5866	0.015737	0.05084	0.992403	814	1	-0.5866
FBgn0265445	4	0.11168	0.21791	0.979758	3716	2	-0.16242	0.015737	0.046343	0.992403	815	1	-0.16242
FBgn0030081	6	0.90776	0.90744	0.998342	14208	0	0.30863	0.015746	0.057046	0.992403	816	3	0.30863
FBgn0035064	6	0.56464	0.70191	0.988564	10308	2	-0.035231	0.015762	0.057092	0.992403	817	2	-0.035231
FBgn0261571	6	0.39927	0.56308	0.988564	8557	2	0.3012	0.015762	0.057092	0.992403	818	3	0.3012
FBgn0051235	6	0.56464	0.70191	0.988564	10353	2	0.32927	0.015762	0.057092	0.992403	819	3	0.32927
FBgn0029711	6	0.56464	0.70191	0.988564	10492	2	-0.2546	0.015762	0.057092	0.992403	820	1	-0.2546
FBgn0259736	6	0.62565	0.73513	0.989455	11066	1	0.22088	0.015762	0.057092	0.992403	821	3	0.22088
FBgn0050011	9	0.21326	0.43603	0.983925	5858	3	-0.25056	0.015804	0.064685	0.992403	822	4	-0.25056
FBgn0266817	4	0.54382	0.59428	0.988564	10120	1	0.11654	0.015808	0.046496	0.992403	823	2	0.11654
FBgn0027083	5	0.0090297	0.030938	0.943341	520	2	-0.082551	0.015825	0.051077	0.992403	824	1	-0.082551
FBgn0038695	6	0.90428	0.90401	0.998342	14156	0	0.38836	0.015845	0.057281	0.992403	825	4	0.38836
FBgn0032456	4	0.92068	0.92033	0.998342	14405	0	-0.024453	0.015855	0.046602	0.992403	826	1	-0.024453
FBgn0046687	6	0.24289	0.43067	0.979758	6500	3	0.3117	0.015857	0.057305	0.992403	827	3	0.3117
FBgn0065110	6	0.7348	0.78198	0.989455	12023	1	-0.020656	0.015857	0.057305	0.992403	828	2	-0.020656
FBgn0020269	6	0.10965	0.24479	0.979758	3681	1	0.42778	0.0159	0.057429	0.992403	829	4	0.42778
FBgn0021768	4	0.80242	0.80189	0.989455	12798	0	0.46878	0.015902	0.0467	0.992403	830	2	0.46878
FBgn0003373	6	0.64643	0.74308	0.989455	11245	1	0.46404	0.015909	0.057452	0.992403	831	3	0.46404
FBgn0265828	4	0.5279	0.58482	0.988564	9982	1	0.732	0.015954	0.046821	0.992403	832	3	0.732
FBgn0030283	6	0.16147	0.31919	0.979758	4838	2	0.2348	0.015968	0.0576	0.992403	833	3	0.2348
FBgn0013432	6	0.87515	0.8755	0.989455	13711	1	0.1859	0.015984	0.057641	0.992403	834	2	0.1859
FBgn0035995	6	0.89427	0.89411	0.998342	13990	0	0.70378	0.015988	0.057659	0.992403	835	4	0.70378
FBgn0016660	6	0.022903	0.073368	0.950637	1125	3	-0.31609	0.01601	0.05772	0.992403	836	2	-0.31609
FBgn0034737	6	0.49593	0.64273	0.988564	9599	2	0.31714	0.016049	0.057832	0.992403	837	3	0.31714
FBgn0051708	6	0.94914	0.94901	0.998342	14822	0	0.22977	0.016058	0.057851	0.992403	838	3	0.22977
FBgn0004666	8	0.11478	0.27704	0.979758	3789	2	-0.078761	0.016067	0.064479	0.992403	839	2	-0.078761
FBgn0030103	6	0.044393	0.12544	0.967275	1885	4	-0.33677	0.016079	0.057894	0.992403	840	1	-0.33677
FBgn0053985	6	0.059511	0.16015	0.967275	2343	2	0.34558	0.016106	0.057963	0.992403	841	3	0.34558
FBgn0267158	4	0.6174	0.64211	0.988564	11004	1	0.7571	0.016111	0.047197	0.992403	842	2	0.7571
FBgn0035900	4	0.53836	0.59105	0.988564	10088	1	0.6784	0.016111	0.047197	0.992403	843	3	0.6784
FBgn0264841	4	0.33603	0.47363	0.986685	7760	2	0.20016	0.016111	0.047197	0.992403	844	2	0.20016
FBgn0267530	4	0.1612	0.27479	0.979758	4827	2	0.63743	0.016111	0.047197	0.992403	845	2	0.63743
FBgn0264993	4	0.080079	0.17716	0.968859	3017	2	0.3621	0.016111	0.047197	0.992403	846	2	0.3621
FBgn0039299	6	0.38883	0.55464	0.988564	8437	1	0.39283	0.016127	0.058026	0.992403	847	3	0.39283
FBgn0266801	6	0.31249	0.4942	0.988564	7485	2	0.25993	0.016162	0.058107	0.992403	848	3	0.25993
FBgn0052071	6	0.020012	0.066044	0.950637	1007	2	0.14445	0.016207	0.058225	0.992403	849	2	0.14445
FBgn0261804	6	0.97192	0.97204	0.998526	15210	0	0.33483	0.016239	0.058303	0.992403	850	3	0.33483
FBgn0028341	15	0.53685	0.79637	0.989455	10073	4	0.014183	0.016263	0.079743	0.99685	851	5	0.014183
FBgn0259998	6	0.85413	0.85718	0.989455	13430	1	0.49039	0.01629	0.058446	0.992403	852	4	0.49039
FBgn0010352	6	0.56464	0.70191	0.988564	10369	2	-0.24205	0.01629	0.058446	0.992403	853	2	-0.24205
FBgn0043471	6	0.30447	0.48794	0.988564	7377	1	0.52512	0.016313	0.058494	0.992403	854	3	0.52512
FBgn0053290	6	0.78795	0.81096	0.989455	12614	1	0.82507	0.016313	0.058494	0.992403	855	4	0.82507
FBgn0034552	6	0.14319	0.29327	0.979758	4432	2	0.74867	0.016313	0.058495	0.992403	856	4	0.74867
FBgn0029966	6	0.00090114	0.0045659	0.792678	80	2	0.68555	0.016313	0.058495	0.992403	857	4	0.68555
FBgn0051445	6	0.87515	0.8755	0.989455	13752	1	0.71347	0.016405	0.058718	0.992403	858	4	0.71347
FBgn0266895	4	0.46341	0.5485	0.988564	9252	1	0.4665	0.016429	0.047896	0.992403	859	3	0.4665
FBgn0033809	6	0.12335	0.26491	0.979758	4010	2	0.57328	0.016438	0.058799	0.992403	860	4	0.57328
FBgn0028875	6	0.97895	0.97899	0.999085	15301	0	0.42913	0.016459	0.058859	0.992403	861	3	0.42913
FBgn0030122	4	0.95078	0.95061	0.998342	14859	0	0.6428	0.016469	0.047992	0.992403	862	3	0.6428
FBgn0030951	6	0.34896	0.52279	0.988564	8025	2	0.10827	0.016571	0.059176	0.992403	863	2	0.10827
FBgn0051477	6	0.24289	0.43067	0.979758	6338	3	-0.13652	0.016571	0.059176	0.992403	864	2	-0.13652
FBgn0053057	4	0.98456	0.98456	0.999085	15386	0	0.90641	0.016573	0.048202	0.992403	865	3	0.90641
FBgn0034537	6	0.56464	0.70191	0.988564	10513	2	0.56528	0.016586	0.059219	0.992403	866	4	0.56528
FBgn0266225	4	0.045163	0.10789	0.963993	1904	2	-0.48135	0.016606	0.048271	0.992403	867	1	-0.48135
FBgn0054026	6	0.80748	0.82331	0.989455	12854	1	0.64314	0.01664	0.05937	0.992403	868	4	0.64314
FBgn0243514	6	0.47514	0.62522	0.988564	9375	2	0.57769	0.016673	0.059454	0.992403	869	4	0.57769
FBgn0024329	6	0.19869	0.37099	0.979758	5554	2	0.48964	0.016673	0.059454	0.992403	870	4	0.48964
FBgn0266111	6	0.097412	0.2267	0.979758	3405	2	0.26928	0.016712	0.059549	0.992403	871	3	0.26928
FBgn0003882	6	0.14994	0.30288	0.979758	4573	2	0.11132	0.016742	0.059614	0.992403	872	3	0.11132
FBgn0265703	4	0.86717	0.86674	0.989455	13534	0	0.46143	0.016812	0.048722	0.992403	873	3	0.46143
FBgn0034763	6	0.53431	0.6754	0.988564	10054	1	0.012342	0.016817	0.059803	0.992403	874	2	0.012342
FBgn0039945	6	0.91025	0.90995	0.998342	14238	0	0.37868	0.016853	0.059884	0.992403	875	4	0.37868
FBgn0020372	4	0.027988	0.071893	0.950637	1305	2	0.23808	0.016864	0.048835	0.992403	876	2	0.23808
FBgn0038811	2	0.24489	0.27437	0.979758	6561	1	0.5579	0.0169	0.031434	0.992403	877	1	0.5579
FBgn0266951	4	0.17023	0.28509	0.979758	5008	1	1.0052	0.016932	0.048993	0.992403	878	3	1.0052
FBgn0032385	6	0.11823	0.25756	0.979758	3882	2	0.17445	0.016958	0.060133	0.992403	879	2	0.17445
FBgn0261584	3	0.064677	0.12397	0.967275	2475	2	-0.64701	0.016964	0.044254	0.992403	880	1	-0.64701
FBgn0034515	6	0.90795	0.90761	0.998342	14215	0	0.72593	0.017028	0.060329	0.992403	881	4	0.72593
FBgn0013718	13	0.72533	0.88169	0.994383	11948	1	-0.06939	0.017135	0.079246	0.99685	882	5	-0.06939
FBgn0027932	6	0.76751	0.79923	0.989455	12395	1	0.08087	0.017169	0.060661	0.992403	883	2	0.08087
FBgn0028932	4	0.38888	0.51024	0.988564	8441	1	0.58014	0.017188	0.049558	0.992403	884	3	0.58014
FBgn0036131	4	0.33603	0.47363	0.986685	7873	2	-0.36278	0.017216	0.049617	0.992403	885	1	-0.36278
FBgn0040502	6	0.37122	0.54043	0.988564	8236	2	0.10218	0.017239	0.060848	0.992403	886	3	0.10218
FBgn0027594	6	0.76044	0.7953	0.989455	12324	1	0.51859	0.01724	0.060852	0.992403	887	4	0.51859
FBgn0032368	6	0.71831	0.774	0.989455	11883	1	0.50709	0.017279	0.060953	0.992403	888	4	0.50709
FBgn0266411	8	0.38484	0.59983	0.988564	8388	2	0.12524	0.017289	0.067977	0.992403	889	3	0.12524
FBgn0259789	5	0.31647	0.465	0.986685	7521	1	-0.11223	0.017298	0.055247	0.992403	890	2	-0.11223
FBgn0267645	4	0.19321	0.31146	0.979758	5450	2	-0.40933	0.01731	0.049828	0.992403	891	1	-0.40933
FBgn0263022	6	0.56464	0.70191	0.988564	10406	2	-0.030599	0.01738	0.061216	0.992403	892	2	-0.030599
FBgn0260750	6	0.87515	0.8755	0.989455	13635	1	0.32183	0.017389	0.06124	0.992403	893	3	0.32183
FBgn0051802	5	0.9106	0.91088	0.998342	14247	0	0.60055	0.017396	0.055538	0.992403	894	3	0.60055
FBgn0004435	2	0.28237	0.30469	0.979758	7072	1	0.76981	0.017407	0.032372	0.992403	895	1	0.76981
FBgn0001256	6	0.99312	0.99314	0.999085	15528	0	0.36089	0.017411	0.061292	0.992403	896	4	0.36089
FBgn0030376	6	0.43644	0.59343	0.988564	8913	1	-0.0615	0.01745	0.061396	0.992403	897	1	-0.0615
FBgn0261998	6	0.3436	0.5186	0.988564	7955	2	0.42748	0.017471	0.061442	0.992403	898	4	0.42748
FBgn0051803	6	0.56464	0.70191	0.988564	10304	2	0.57838	0.017479	0.061458	0.992403	899	3	0.57838
FBgn0035371	6	0.97179	0.97192	0.998526	15205	0	0.61517	0.017479	0.061458	0.992403	900	3	0.61517
FBgn0052374	6	0.99254	0.99257	0.999085	15521	0	0.47032	0.017517	0.061552	0.992403	901	4	0.47032
FBgn0028514	6	0.56741	0.70435	0.989455	10601	1	-0.081899	0.017555	0.061644	0.992403	902	2	-0.081899
FBgn0031609	4	0.22836	0.35145	0.979758	6100	1	0.80367	0.017614	0.050501	0.992403	903	3	0.80367
FBgn0030239	5	0.6362	0.69442	0.988564	11156	1	0.22369	0.017634	0.056166	0.992403	904	3	0.22369
FBgn0001404	7	0.65563	0.77962	0.989455	11342	2	0.4405	0.017644	0.064193	0.992403	905	4	0.4405
FBgn0260439	6	0.47375	0.62408	0.988564	9354	2	0.65204	0.017646	0.061893	0.992403	906	4	0.65204
FBgn0030186	6	0.73273	0.78096	0.989455	12008	1	0.644	0.017659	0.061935	0.992403	907	3	0.644
FBgn0031258	6	0.053873	0.14732	0.967275	2185	2	0.22022	0.017659	0.061935	0.992403	908	3	0.22022
FBgn0264543	6	0.63531	0.73884	0.989455	11147	1	0.47717	0.017665	0.061951	0.992403	909	3	0.47717
FBgn0003300	7	0.97602	0.97603	0.999085	15262	0	0.53893	0.017715	0.064405	0.992403	910	5	0.53893
FBgn0039370	6	0.082016	0.20352	0.979758	3059	1	0.23367	0.017765	0.062236	0.992403	911	3	0.23367
FBgn0050274	6	0.83111	0.83962	0.989455	13132	1	0.43245	0.017801	0.062318	0.992403	912	4	0.43245
FBgn0036108	6	0.78033	0.80647	0.989455	12530	1	0.52735	0.017808	0.062338	0.992403	913	4	0.52735
FBgn0031229	6	0.14854	0.30089	0.979758	4545	2	0.030228	0.01782	0.062368	0.992403	914	2	0.030228
FBgn0005636	6	0.62356	0.73435	0.989455	11053	1	0.389	0.017836	0.062414	0.992403	915	4	0.389
FBgn0033865	6	0.37391	0.54265	0.988564	8259	2	0.60458	0.017836	0.062414	0.992403	916	3	0.60458
FBgn0036713	6	0.10944	0.24447	0.979758	3677	3	-0.34134	0.017843	0.062429	0.992403	917	3	-0.34134
FBgn0010497	5	0.16447	0.32001	0.979758	4896	2	0.69368	0.017848	0.056781	0.992403	918	3	0.69368
FBgn0045479	6	0.16862	0.32919	0.979758	4977	3	-0.35525	0.017949	0.062705	0.992403	919	2	-0.35525
FBgn0263855	6	0.43966	0.59605	0.988564	8948	2	0.76057	0.017992	0.062827	0.992403	920	4	0.76057
FBgn0032590	6	0.037326	0.10873	0.963993	1671	4	-0.50973	0.018012	0.062881	0.992403	921	1	-0.50973
FBgn0002036	6	0.89608	0.89587	0.998342	14016	0	0.4529	0.018025	0.06291	0.992403	922	3	0.4529
FBgn0030156	6	0.17063	0.332	0.979758	5014	1	-0.086208	0.018066	0.063019	0.992403	923	2	-0.086208
FBgn0262897	4	0.66252	0.67496	0.988564	11391	1	0.68147	0.018092	0.051549	0.992403	924	3	0.68147
FBgn0038878	6	0.44542	0.60062	0.988564	9016	2	0.63729	0.018109	0.063117	0.992403	925	4	0.63729
FBgn0025885	6	0.038146	0.11071	0.967068	1697	3	-0.033377	0.018153	0.063232	0.992403	926	3	-0.033377
FBgn0262577	6	0.85534	0.8582	0.989455	13448	1	0.46242	0.018164	0.063262	0.992403	927	4	0.46242
FBgn0030593	6	0.51991	0.66304	0.988564	9893	2	-0.023288	0.018167	0.063276	0.992403	928	2	-0.023288
FBgn0051288	6	0.42343	0.5827	0.988564	8773	2	0.17646	0.018167	0.063276	0.992403	929	3	0.17646
FBgn0262994	4	0.98774	0.98774	0.999085	15435	0	1.1351	0.01818	0.051742	0.992403	930	3	1.1351
FBgn0267749	4	0.14922	0.26091	0.979758	4558	1	0.90897	0.01818	0.051742	0.992403	931	3	0.90897
FBgn0030251	6	0.20917	0.3852	0.979758	5770	2	-0.024605	0.018223	0.063428	0.992403	932	3	-0.024605
FBgn0024975	6	0.20923	0.38528	0.979758	5774	3	-0.22976	0.018293	0.063611	0.992403	933	1	-0.22976
FBgn0264748	6	0.0060933	0.024578	0.926279	375	2	0.68157	0.018307	0.063651	0.992403	934	4	0.68157
FBgn0035007	6	0.84545	0.85033	0.989455	13310	1	0.50599	0.018342	0.06373	0.992403	935	4	0.50599
FBgn0032843	6	0.47905	0.62849	0.988564	9420	1	0.2037	0.018384	0.063834	0.992403	936	3	0.2037
FBgn0038217	6	0.34084	0.51641	0.988564	7935	2	0.58993	0.018417	0.063915	0.992403	937	4	0.58993
FBgn0261385	6	0.10084	0.2318	0.979758	3473	1	0.44915	0.018426	0.063937	0.992403	938	3	0.44915
FBgn0029834	6	0.43761	0.59437	0.988564	8928	2	0.38195	0.018426	0.063937	0.992403	939	3	0.38195
FBgn0033128	5	0.90763	0.90785	0.998342	14206	0	0.15057	0.018463	0.058499	0.992403	940	2	0.15057
FBgn0013753	4	0.83095	0.83044	0.989455	13130	0	0.33072	0.01853	0.052517	0.992403	941	2	0.33072
FBgn0053145	6	0.83924	0.84571	0.989455	13226	1	0.41051	0.01856	0.064286	0.992403	942	3	0.41051
FBgn0266246	4	0.15981	0.27315	0.979758	4797	2	-0.10423	0.018577	0.052621	0.992403	943	2	-0.10423
FBgn0030191	6	0.87515	0.8755	0.989455	13756	1	0.64503	0.018602	0.064398	0.992403	944	4	0.64503
FBgn0002564	6	0.25199	0.44276	0.986685	6658	2	0.60356	0.018621	0.064451	0.992403	945	4	0.60356
FBgn0035113	6	0.40052	0.5641	0.988564	8567	1	0.2541	0.018635	0.064474	0.992403	946	3	0.2541
FBgn0001104	6	0.098753	0.22872	0.979758	3436	2	0.0018697	0.018644	0.064494	0.992403	947	2	0.0018697
FBgn0032088	6	0.69849	0.76492	0.989455	11686	1	0.54757	0.018683	0.064605	0.992403	948	4	0.54757
FBgn0260499	6	0.96366	0.96373	0.998342	15070	0	0.98735	0.01875	0.064781	0.992403	949	4	0.98735
FBgn0002723	6	0.70533	0.76795	0.989455	11750	1	0.58949	0.018755	0.064794	0.992403	950	4	0.58949
FBgn0001225	4	0.31201	0.44641	0.986685	7481	1	0.54811	0.01876	0.05302	0.992403	951	2	0.54811
FBgn0004655	6	0.5953	0.72402	0.989455	10829	1	0.50938	0.018772	0.064841	0.992403	952	4	0.50938
FBgn0034915	6	0.18513	0.35228	0.979758	5302	1	-0.090262	0.018784	0.064866	0.992403	953	2	-0.090262
FBgn0052801	5	0.91946	0.91968	0.998342	14381	0	0.33313	0.018814	0.059506	0.992403	954	3	0.33313
FBgn0259863	4	0.71998	0.72209	0.989455	11892	1	0.18348	0.018858	0.053244	0.992403	955	2	0.18348
FBgn0266540	2	0.41659	0.42087	0.979758	8723	1	0.55368	0.01902	0.035248	0.992403	956	1	0.55368
FBgn0033072	6	0.0058443	0.023676	0.926279	357	3	-0.77734	0.019075	0.065618	0.992403	957	2	-0.77734
FBgn0038629	6	0.02073	0.067839	0.950637	1035	3	-0.21728	0.0191	0.065686	0.992403	958	2	-0.21728
FBgn0011284	6	0.81679	0.82948	0.989455	12959	1	0.73311	0.01916	0.065836	0.992403	959	4	0.73311
FBgn0032251	6	0.18212	0.34816	0.979758	5248	2	0.7629	0.01916	0.065836	0.992403	960	4	0.7629
FBgn0046999	6	0.96149	0.96153	0.998342	15038	0	0.29109	0.019193	0.065935	0.992403	961	3	0.29109
FBgn0037955	7	0.59847	0.73508	0.989455	10854	1	0.44884	0.019228	0.069156	0.992403	962	4	0.44884
FBgn0033065	6	0.15417	0.30888	0.979758	4681	1	0.30107	0.019276	0.066149	0.992403	963	3	0.30107
FBgn0032265	6	0.90403	0.90376	0.998342	14152	0	0.35005	0.01928	0.066167	0.992403	964	3	0.35005
FBgn0265306	4	0.59934	0.62982	0.988564	10863	1	0.75959	0.01934	0.054354	0.992403	965	3	0.75959
FBgn0015381	6	0.37037	0.53975	0.988564	8230	1	0.42197	0.019343	0.066321	0.992403	966	4	0.42197
FBgn0262003	6	0.63423	0.73842	0.989455	11140	1	0.26125	0.019356	0.06635	0.992403	967	3	0.26125
FBgn0003079	6	0.97895	0.97899	0.999085	15303	0	0.67429	0.019409	0.066469	0.992403	968	4	0.67429
FBgn0267400	4	0.97335	0.97313	0.998526	15229	0	0.4803	0.019421	0.054538	0.992403	969	3	0.4803
FBgn0037844	6	0.9363	0.93621	0.998342	14626	0	0.42705	0.019424	0.06651	0.992403	970	3	0.42705
FBgn0051092	6	0.80166	0.81958	0.989455	12789	1	0.045978	0.019486	0.066656	0.992403	971	2	0.045978
FBgn0051044	4	0.96913	0.96889	0.998471	15160	0	0.33648	0.019514	0.054746	0.992403	972	3	0.33648
FBgn0015781	6	0.12944	0.27377	0.979758	4141	3	-0.3834	0.019636	0.067021	0.992403	973	2	-0.3834
FBgn0051438	6	0.57342	0.70963	0.989455	10646	1	0.22954	0.019653	0.067063	0.992403	974	3	0.22954
FBgn0031715	6	0.45141	0.60563	0.988564	9083	2	0.51505	0.019701	0.067183	0.992403	975	3	0.51505
FBgn0037911	6	0.056783	0.15395	0.967275	2268	2	0.63985	0.019701	0.067183	0.992403	976	4	0.63985
FBgn0261611	8	0.31473	0.5298	0.988564	7505	3	-0.21607	0.019747	0.074943	0.99685	977	2	-0.21607
FBgn0034054	6	0.17991	0.34507	0.979758	5202	2	0.4162	0.019805	0.067446	0.992403	978	3	0.4162
FBgn0037998	6	0.94188	0.94177	0.998342	14709	0	0.53395	0.019829	0.067512	0.992403	979	4	0.53395
FBgn0265186	5	0.39009	0.53565	0.988564	8458	2	0.061807	0.019854	0.062371	0.992403	980	2	0.061807
FBgn0063491	5	0.055535	0.1383	0.967275	2237	2	-0.068929	0.019854	0.062371	0.992403	981	2	-0.068929
FBgn0262101	6	0.87515	0.8755	0.989455	13761	1	0.46765	0.01987	0.067606	0.992403	982	4	0.46765
FBgn0051870	6	0.4848	0.63334	0.988564	9488	2	0.20969	0.019872	0.067609	0.992403	983	3	0.20969
FBgn0039766	6	0.87515	0.8755	0.989455	13606	1	0.33715	0.019872	0.067609	0.992403	984	4	0.33715
FBgn0037199	6	0.24289	0.43067	0.979758	6470	3	-0.49321	0.019872	0.067609	0.992403	985	1	-0.49321
FBgn0035699	6	0.08938	0.21463	0.979758	3233	3	-0.39249	0.019872	0.067609	0.992403	986	2	-0.39249
FBgn0035733	6	0.76044	0.7953	0.989455	12325	1	0.70226	0.019872	0.067609	0.992403	987	3	0.70226
FBgn0034907	6	0.45353	0.60738	0.988564	9104	2	-0.39306	0.019872	0.067609	0.992403	988	2	-0.39306
FBgn0267555	3	0.87339	0.87344	0.989455	13563	0	0.2891	0.019887	0.051333	0.992403	989	2	0.2891
FBgn0035247	3	0.64665	0.64717	0.988564	11260	1	0.6447	0.019887	0.051333	0.992403	990	2	0.6447
FBgn0053532	6	0.10283	0.23473	0.979758	3516	2	0.43641	0.019904	0.067691	0.992403	991	4	0.43641
FBgn0037031	5	0.82339	0.8241	0.989455	13029	1	0.4235	0.019955	0.06265	0.992403	992	4	0.4235
FBgn0038645	6	0.82789	0.83721	0.989455	13095	1	0.18534	0.019956	0.067832	0.992403	993	3	0.18534
FBgn0033210	6	0.89552	0.89532	0.998342	14012	0	0.55849	0.02	0.067925	0.992403	994	4	0.55849
FBgn0033890	4	0.41427	0.52281	0.988564	8695	1	0.57753	0.020006	0.055783	0.992403	995	2	0.57753
FBgn0033990	5	0.16406	0.31933	0.979758	4883	2	-0.029643	0.020042	0.062897	0.992403	996	2	-0.029643
FBgn0085271	4	0.17361	0.28893	0.979758	5069	1	1.0789	0.020064	0.055916	0.992403	997	3	1.0789
FBgn0052982	6	0.078381	0.19801	0.979758	2913	2	0.22403	0.020076	0.068138	0.992403	998	3	0.22403
FBgn0262480	6	0.80367	0.82083	0.989455	12809	1	0.3278	0.020142	0.068307	0.992403	999	3	0.3278
FBgn0033817	6	0.72768	0.77844	0.989455	11965	1	0.37737	0.020199	0.068446	0.992403	1000	3	0.37737
FBgn0034622	6	0.202	0.37557	0.979758	5619	2	0.25132	0.020203	0.068458	0.992403	1001	3	0.25132
FBgn0266973	4	0.83981	0.83924	0.989455	13246	0	0.61989	0.02025	0.056325	0.992403	1002	2	0.61989
FBgn0000117	6	0.94728	0.94708	0.998342	14786	0	0.24222	0.020258	0.068586	0.992403	1003	3	0.24222
FBgn0036862	8	0.46068	0.67192	0.988564	9215	1	-0.19713	0.020262	0.076339	0.99685	1004	3	-0.19713
FBgn0051343	6	0.56464	0.70191	0.988564	10325	2	0.15239	0.020291	0.068675	0.992403	1005	3	0.15239
FBgn0033236	6	0.76345	0.79701	0.989455	12364	1	0.25401	0.020291	0.068675	0.992403	1006	3	0.25401
FBgn0265940	4	0.91116	0.91089	0.998342	14253	0	0.7268	0.020335	0.056504	0.992403	1007	3	0.7268
FBgn0267257	4	0.34938	0.48872	0.988564	8031	1	0.48901	0.020349	0.056542	0.992403	1008	2	0.48901
FBgn0263344	4	0.91797	0.91764	0.998342	14357	0	0.70193	0.020357	0.05656	0.992403	1009	3	0.70193
FBgn0038017	6	0.56464	0.70191	0.988564	10504	2	0.038813	0.020398	0.068923	0.992403	1010	2	0.038813
FBgn0015008	6	0.67988	0.75686	0.989455	11539	1	0.5619	0.020398	0.068925	0.992403	1011	4	0.5619
FBgn0260986	6	0.47067	0.62154	0.988564	9323	2	0.33618	0.020415	0.068973	0.992403	1012	3	0.33618
FBgn0026371	5	0.91768	0.91792	0.998342	14350	0	0.50131	0.020473	0.064038	0.992403	1013	4	0.50131
FBgn0265197	6	0.1153	0.25327	0.979758	3799	1	0.1867	0.020492	0.069162	0.992403	1014	3	0.1867
FBgn0085293	6	0.87515	0.8755	0.989455	13582	1	0.59096	0.020656	0.069552	0.992403	1015	4	0.59096
FBgn0032371	2	0.62002	0.61975	0.988564	11024	0	0.3989	0.020656	0.038196	0.992403	1016	1	0.3989
FBgn0037501	6	0.094671	0.22257	0.979758	3337	3	-0.44146	0.020664	0.069571	0.992403	1017	2	-0.44146
FBgn0035385	6	0.24289	0.43067	0.979758	6340	3	-0.11408	0.020748	0.069775	0.992403	1018	1	-0.11408
FBgn0034281	6	0.68634	0.75963	0.989455	11582	1	0.23664	0.020879	0.07014	0.992403	1019	2	0.23664
FBgn0004242	6	0.76912	0.80013	0.989455	12405	1	0.61288	0.020886	0.070161	0.992403	1020	4	0.61288
FBgn0036331	6	0.33006	0.50794	0.988564	7693	2	0.46334	0.020886	0.070161	0.992403	1021	4	0.46334
FBgn0019932	6	0.87515	0.8755	0.989455	13731	1	0.84083	0.020886	0.070161	0.992403	1022	4	0.84083
FBgn0262107	4	0.1938	0.31214	0.979758	5468	2	-0.22329	0.020895	0.057718	0.992403	1023	1	-0.22329
FBgn0266254	4	0.5805	0.61737	0.988564	10709	1	0.3025	0.020895	0.057718	0.992403	1024	2	0.3025
FBgn0266580	4	0.57488	0.61373	0.988564	10665	1	0.62681	0.020895	0.057718	0.992403	1025	3	0.62681
FBgn0265526	4	0.92831	0.92794	0.998342	14501	0	0.61127	0.020909	0.057746	0.992403	1026	3	0.61127
FBgn0265042	14	0.70479	0.88079	0.993871	11744	3	0.15511	0.020934	0.094702	0.99685	1027	6	0.15511
FBgn0263988	6	0.063322	0.16872	0.967275	2443	3	-0.36731	0.020958	0.070336	0.992403	1028	2	-0.36731
FBgn0024191	6	0.33285	0.51006	0.988564	7721	1	0.47655	0.021009	0.070448	0.992403	1029	3	0.47655
FBgn0025629	6	0.45	0.60447	0.988564	9062	2	-0.28928	0.021099	0.070681	0.992403	1030	1	-0.28928
FBgn0265138	6	0.5321	0.67347	0.988564	10040	2	0.53355	0.021159	0.070844	0.992403	1031	4	0.53355
FBgn0020509	6	0.10499	0.23796	0.979758	3571	3	-0.062294	0.021169	0.070861	0.992403	1032	2	-0.062294
FBgn0034379	6	0.9271	0.92691	0.998342	14485	0	0.40162	0.021238	0.071024	0.992403	1033	4	0.40162
FBgn0265806	4	0.89998	0.89958	0.998342	14083	0	0.22312	0.021303	0.058588	0.992403	1034	2	0.22312
FBgn0041231	6	0.74986	0.7897	0.989455	12108	1	-0.18256	0.021309	0.071192	0.992403	1035	1	-0.18256
FBgn0036877	5	0.30304	0.45225	0.986685	7352	1	0.05018	0.021328	0.066378	0.992403	1036	2	0.05018
FBgn0053289	6	0.87515	0.8755	0.989455	13627	1	0.57557	0.021347	0.07128	0.992403	1037	4	0.57557
FBgn0036641	6	0.39303	0.55801	0.988564	8498	2	0.36738	0.021379	0.071381	0.992403	1038	4	0.36738
FBgn0033903	6	0.049917	0.13819	0.967275	2062	2	0.60412	0.021379	0.071381	0.992403	1039	4	0.60412
FBgn0001941	6	0.0011048	0.005382	0.824444	95	2	0.40505	0.021379	0.071381	0.992403	1040	4	0.40505
FBgn0016122	6	0.38883	0.55464	0.988564	8439	2	0.22507	0.021423	0.071511	0.992403	1041	3	0.22507
FBgn0027335	2	0.16543	0.21219	0.979758	4915	1	0.62543	0.021467	0.039628	0.992403	1042	1	0.62543
FBgn0032170	6	0.78749	0.8107	0.989455	12608	1	0.16884	0.021484	0.071668	0.992403	1043	2	0.16884
FBgn0263655	6	0.029962	0.09102	0.952497	1405	2	-0.00025616	0.021484	0.071668	0.992403	1044	1	-0.00025616
FBgn0035702	6	0.99004	0.99006	0.999085	15475	0	0.60849	0.021522	0.071762	0.992403	1045	4	0.60849
FBgn0038463	6	0.99065	0.99067	0.999085	15486	0	0.51397	0.021542	0.071816	0.992403	1046	4	0.51397
FBgn0002868	4	0.10072	0.20521	0.979758	3469	2	0.19121	0.021549	0.05913	0.992403	1047	2	0.19121
FBgn0050350	6	0.54082	0.68114	0.988564	10105	1	0.32992	0.021551	0.07184	0.992403	1048	4	0.32992
FBgn0029947	6	0.38354	0.55032	0.988564	8369	2	-0.06199	0.021559	0.071854	0.992403	1049	2	-0.06199
FBgn0027866	6	0.34083	0.5164	0.988564	7925	1	-0.15837	0.021589	0.071933	0.992403	1050	1	-0.15837
FBgn0035943	3	0.43046	0.46906	0.986685	8836	1	0.64877	0.021643	0.055727	0.992403	1051	2	0.64877
FBgn0041111	10	0.32739	0.58014	0.988564	7675	2	0.12088	0.021655	0.087166	0.99685	1052	3	0.12088
FBgn0029827	6	0.69408	0.76295	0.989455	11649	1	-0.015728	0.021659	0.072117	0.992403	1053	2	-0.015728
FBgn0036305	4	0.31868	0.45394	0.986685	7555	1	0.32225	0.021702	0.05947	0.992403	1054	2	0.32225
FBgn0266624	4	0.30249	0.43561	0.983565	7340	2	0.56056	0.021714	0.059496	0.992403	1055	2	0.56056
FBgn0031053	6	0.67071	0.753	0.989455	11461	1	0.35329	0.021747	0.072319	0.992403	1056	4	0.35329
FBgn0031694	6	0.61663	0.73175	0.989455	10996	1	0.52276	0.021771	0.072381	0.992403	1057	3	0.52276
FBgn0031500	4	0.69495	0.7007	0.988564	11654	1	0.68771	0.02182	0.059726	0.992403	1058	3	0.68771
FBgn0030969	3	0.59755	0.60146	0.988564	10846	1	0.80952	0.021821	0.056164	0.992403	1059	2	0.80952
FBgn0032519	6	0.92445	0.92423	0.998342	14455	0	0.04945	0.021899	0.072668	0.992403	1060	2	0.04945
FBgn0036206	6	0.37712	0.5452	0.988564	8298	2	0.15558	0.021939	0.072767	0.992403	1061	2	0.15558
FBgn0261058	6	0.81072	0.82547	0.989455	12887	1	-0.080065	0.022009	0.072923	0.992403	1062	2	-0.080065
FBgn0031058	6	0.98468	0.98472	0.999085	15389	0	0.29086	0.02201	0.072924	0.992403	1063	3	0.29086
FBgn0015609	6	0.013266	0.048531	0.950637	717	3	-0.4051	0.022046	0.07303	0.992403	1064	2	-0.4051
FBgn0261004	6	0.79042	0.81241	0.989455	12648	1	0.33974	0.022046	0.07303	0.992403	1065	3	0.33974
FBgn0023175	6	0.95376	0.9537	0.998342	14905	0	0.41251	0.02208	0.07311	0.992403	1066	3	0.41251
FBgn0036427	6	0.056946	0.15433	0.967275	2273	2	0.24706	0.022088	0.073126	0.992403	1067	3	0.24706
FBgn0039808	6	0.72019	0.77487	0.989455	11897	1	0.49283	0.022113	0.073195	0.992403	1068	4	0.49283
FBgn0034988	5	0.97133	0.97144	0.998526	15199	0	0.34822	0.022123	0.068594	0.992403	1069	4	0.34822
FBgn0030410	4	0.13234	0.24152	0.979758	4202	1	0.13058	0.022181	0.060487	0.992403	1070	1	0.13058
FBgn0036466	5	0.88296	0.88337	0.995341	13882	0	0.44566	0.022205	0.068808	0.992403	1071	4	0.44566
FBgn0029930	6	0.25872	0.45161	0.986685	6763	2	0.11484	0.022229	0.073488	0.992403	1072	3	0.11484
FBgn0035677	6	0.44962	0.60415	0.988564	9055	1	0.56208	0.022249	0.073529	0.992403	1073	4	0.56208
FBgn0039806	6	0.16932	0.33017	0.979758	4988	3	-0.22273	0.022254	0.07354	0.992403	1074	2	-0.22273
FBgn0037134	6	0.8997	0.89949	0.998342	14077	0	-0.11616	0.022254	0.07354	0.992403	1075	1	-0.11616
FBgn0265751	4	0.28018	0.41024	0.979758	7035	2	-0.00077315	0.022345	0.060841	0.992403	1076	1	-0.00077315
FBgn0263967	4	0.97692	0.97685	0.999085	15278	0	0.84489	0.022371	0.060881	0.992403	1077	2	0.84489
FBgn0000996	6	0.81049	0.82532	0.989455	12883	1	0.42664	0.022429	0.074007	0.99685	1078	3	0.42664
FBgn0031041	2	0.97751	0.9774	0.999085	15286	0	0.50345	0.022492	0.041516	0.992403	1079	2	0.50345
FBgn0085311	6	0.34857	0.5225	0.988564	8020	2	-0.0073775	0.022534	0.074252	0.99685	1080	1	-0.0073775
FBgn0265719	4	0.94992	0.94974	0.998342	14842	0	0.77035	0.022571	0.061315	0.992403	1081	2	0.77035
FBgn0000308	7	0.66956	0.79062	0.989455	11448	1	0.11933	0.022581	0.07937	0.99685	1082	3	0.11933
FBgn0026602	6	0.20717	0.38254	0.979758	5720	2	0.38323	0.022605	0.074422	0.99685	1083	3	0.38323
FBgn0051698	5	0.684	0.72135	0.989455	11561	1	0.37139	0.022633	0.069956	0.992403	1084	4	0.37139
FBgn0011824	6	0.33954	0.51538	0.988564	7917	1	0.65046	0.022663	0.074565	0.99685	1085	4	0.65046
FBgn0038429	4	0.57435	0.61339	0.988564	10660	1	0.39693	0.022674	0.061541	0.992403	1086	3	0.39693
FBgn0033933	6	0.71831	0.774	0.989455	11880	1	0.51536	0.022828	0.074974	0.99685	1087	4	0.51536
FBgn0037935	6	0.94962	0.94949	0.998342	14832	0	0.46391	0.022828	0.074974	0.99685	1088	4	0.46391
FBgn0051860	6	0.83694	0.84398	0.989455	13192	1	0.014528	0.022884	0.075121	0.99685	1089	2	0.014528
FBgn0033159	6	0.49359	0.64072	0.988564	9568	2	0.15627	0.022914	0.075194	0.99685	1090	3	0.15627
FBgn0030067	6	0.013085	0.048058	0.950637	714	3	-0.13191	0.022919	0.075213	0.99685	1091	1	-0.13191
FBgn0266802	4	0.26605	0.39425	0.979758	6854	1	0.126	0.022948	0.062127	0.992403	1092	2	0.126
FBgn0259179	4	0.71734	0.71976	0.989455	11873	1	0.3394	0.022952	0.062132	0.992403	1093	3	0.3394
FBgn0030985	6	0.081019	0.20202	0.979758	3031	1	0.28403	0.022952	0.075307	0.99685	1094	3	0.28403
FBgn0035266	9	0.0042317	0.02158	0.926279	273	4	0.44286	0.022955	0.088704	0.99685	1095	5	0.44286
FBgn0036481	6	0.917	0.91665	0.998342	14339	0	0.26396	0.022989	0.075397	0.99685	1096	4	0.26396
FBgn0038893	6	0.23715	0.42296	0.979758	6235	1	0.0024653	0.023084	0.075637	0.99685	1097	2	0.0024653
FBgn0031399	6	0.13419	0.28056	0.979758	4248	2	0.42476	0.023084	0.075637	0.99685	1098	4	0.42476
FBgn0036279	6	0.71669	0.77324	0.989455	11859	1	0.22545	0.023141	0.075774	0.99685	1099	3	0.22545
FBgn0265204	4	0.62095	0.6446	0.988564	11032	1	0.76911	0.023255	0.062808	0.992403	1100	2	0.76911
FBgn0037317	6	0.44761	0.60246	0.988564	9043	2	0.42201	0.023262	0.076069	0.99685	1101	4	0.42201
FBgn0032400	6	0.87515	0.8755	0.989455	13704	1	0.21215	0.023271	0.076092	0.99685	1102	3	0.21215
FBgn0032315	5	0.66785	0.71189	0.989455	11430	1	0.43925	0.023283	0.071742	0.992403	1103	3	0.43925
FBgn0000636	6	0.89427	0.89411	0.998342	13987	0	0.38748	0.023288	0.076133	0.99685	1104	3	0.38748
FBgn0036731	6	0.87515	0.8755	0.989455	13843	1	0.37429	0.023361	0.07631	0.99685	1105	4	0.37429
FBgn0023518	4	0.19225	0.31036	0.979758	5433	2	-0.041023	0.023396	0.063134	0.992403	1106	2	-0.041023
FBgn0024288	6	0.99189	0.99194	0.999085	15508	0	0.60608	0.023426	0.076448	0.99685	1107	3	0.60608
FBgn0250835	6	0.6954	0.76355	0.989455	11658	1	0.24654	0.023426	0.076448	0.99685	1108	3	0.24654
FBgn0013305	11	0.10391	0.28614	0.979758	3542	5	-0.23861	0.023475	0.096557	0.99685	1109	4	-0.23861
FBgn0053758	6	0.2098	0.38607	0.979758	5790	2	0.41189	0.023486	0.076595	0.99685	1110	4	0.41189
FBgn0037151	6	0.21952	0.3992	0.979758	5968	2	0.071671	0.023513	0.076669	0.99685	1111	1	0.071671
FBgn0036290	6	0.058765	0.1585	0.967275	2322	1	0.47333	0.023573	0.076811	0.99685	1112	4	0.47333
FBgn0063923	5	0.005544	0.020516	0.926279	346	1	0.63662	0.023575	0.072532	0.992403	1113	4	0.63662
FBgn0266314	4	0.28392	0.41444	0.979758	7095	1	0.23507	0.023583	0.06353	0.992403	1114	2	0.23507
FBgn0039738	3	0.92803	0.9282	0.998342	14495	0	0.83147	0.023647	0.060524	0.992403	1115	2	0.83147
FBgn0267730	4	0.98454	0.98454	0.999085	15384	0	0.40084	0.023653	0.063698	0.992403	1116	3	0.40084
FBgn0034697	6	0.55776	0.69588	0.988564	10222	1	0.67022	0.023658	0.07701	0.99685	1117	4	0.67022
FBgn0032988	5	0.32016	0.4685	0.986685	7575	1	0.065569	0.023675	0.07279	0.992403	1118	2	0.065569
FBgn0036732	6	0.11672	0.25535	0.979758	3829	1	0.48835	0.023693	0.077115	0.99685	1119	4	0.48835
FBgn0030311	6	0.01031	0.039588	0.950637	608	4	-0.56612	0.023828	0.077432	0.99685	1120	1	-0.56612
FBgn0039007	4	0.78229	0.7817	0.989455	12558	0	0.062342	0.02384	0.064064	0.992403	1121	2	0.062342
FBgn0267589	4	0.75019	0.74998	0.989455	12131	1	0.62397	0.023913	0.064221	0.992403	1122	2	0.62397
FBgn0035591	6	0.95312	0.95303	0.998342	14896	0	0.37426	0.023965	0.077771	0.99685	1123	3	0.37426
FBgn0033971	6	0.05483	0.14954	0.967275	2218	3	-0.32428	0.024002	0.077858	0.99685	1124	2	-0.32428
FBgn0004778	6	0.38883	0.55464	0.988564	8436	1	0.11983	0.02406	0.078008	0.99685	1125	2	0.11983
FBgn0014029	6	0.67255	0.75379	0.989455	11473	1	0.29227	0.02406	0.078008	0.99685	1126	2	0.29227
FBgn0019940	6	0.90529	0.90503	0.998342	14173	0	0.56046	0.024089	0.078084	0.99685	1127	4	0.56046
FBgn0050101	6	0.51195	0.65627	0.988564	9798	2	-0.063276	0.024142	0.078211	0.99685	1128	2	-0.063276
FBgn0262874	6	0.99513	0.99516	0.999085	15564	0	0.37884	0.024142	0.078211	0.99685	1129	3	0.37884
FBgn0051551	6	0.93253	0.93237	0.998342	14567	0	0.59628	0.024207	0.078377	0.99685	1130	3	0.59628
FBgn0031811	6	0.13502	0.28178	0.979758	4261	3	0.0523	0.024222	0.078414	0.99685	1131	3	0.0523
FBgn0026268	6	0.10731	0.24138	0.979758	3631	3	-0.21933	0.024247	0.078473	0.99685	1132	2	-0.21933
FBgn0036528	5	0.38454	0.53037	0.988564	8382	1	0.10334	0.02425	0.07437	0.99685	1133	2	0.10334
FBgn0033886	4	0.75019	0.74998	0.989455	12237	1	0.42619	0.02433	0.065112	0.992403	1134	2	0.42619
FBgn0086370	6	0.0006152	0.0032721	0.724579	48	4	-0.60883	0.024352	0.078747	0.99685	1135	1	-0.60883
FBgn0037940	6	0.7976	0.817	0.989455	12736	1	-0.056858	0.024352	0.078747	0.99685	1136	2	-0.056858
FBgn0004606	7	0.72001	0.8103	0.989455	11893	1	0.24296	0.024354	0.084773	0.99685	1137	3	0.24296
FBgn0034204	6	0.81971	0.83148	0.989455	12999	1	0.2222	0.024456	0.079007	0.99685	1138	3	0.2222
FBgn0263331	4	0.026661	0.06898	0.950637	1258	1	0.35834	0.024493	0.065453	0.992403	1139	3	0.35834
FBgn0037772	4	0.88684	0.88636	0.997704	13899	0	0.59101	0.024497	0.065465	0.992403	1140	3	0.59101
FBgn0052299	4	0.75019	0.74998	0.989455	12192	1	0.33633	0.024563	0.065621	0.992403	1141	2	0.33633
FBgn0037140	6	0.025327	0.079463	0.950637	1215	2	-0.20605	0.024571	0.079293	0.99685	1142	2	-0.20605
FBgn0265991	9	0.25456	0.4916	0.988564	6695	4	-0.04867	0.024597	0.094079	0.99685	1143	2	-0.04867
FBgn0051365	6	0.63531	0.73884	0.989455	11150	1	0.68579	0.024597	0.079365	0.99685	1144	4	0.68579
FBgn0038008	6	0.75163	0.79064	0.989455	12263	1	0.56775	0.024597	0.079365	0.99685	1145	4	0.56775
FBgn0266142	4	0.75019	0.74998	0.989455	12199	1	0.58743	0.024632	0.065796	0.992403	1146	2	0.58743
FBgn0261477	4	0.090935	0.19392	0.979758	3259	2	0.18038	0.024656	0.065845	0.992403	1147	2	0.18038
FBgn0259992	8	0.14588	0.32857	0.979758	4498	2	-0.16649	0.024688	0.088688	0.99685	1148	2	-0.16649
FBgn0266306	4	0.46419	0.54892	0.988564	9263	1	0.55575	0.024786	0.06612	0.992403	1149	3	0.55575
FBgn0265087	4	0.4738	0.55419	0.988564	9359	1	0.27388	0.024796	0.066146	0.992403	1150	2	0.27388
FBgn0039376	6	0.65185	0.74524	0.989455	11308	1	0.26846	0.024806	0.079865	0.99685	1151	3	0.26846
FBgn0015402	6	0.33389	0.5109	0.988564	7728	2	0.062029	0.024806	0.079865	0.99685	1152	1	0.062029
FBgn0017567	6	0.20666	0.38187	0.979758	5710	3	-0.17602	0.024806	0.079865	0.99685	1153	2	-0.17602
FBgn0033860	6	0.060222	0.16173	0.967275	2361	1	0.16857	0.024806	0.079865	0.99685	1154	3	0.16857
FBgn0085599	6	0.76358	0.79708	0.989455	12365	1	0.28894	0.024808	0.079872	0.99685	1155	3	0.28894
FBgn0035497	10	0.10911	0.28807	0.979758	3670	3	0.11935	0.024853	0.096824	0.99685	1156	3	0.11935
FBgn0028675	6	0.24289	0.43067	0.979758	6499	3	-0.24858	0.02486	0.079999	0.99685	1157	2	-0.24858
FBgn0051975	2	0.9751	0.97502	0.999027	15252	0	0.82372	0.024903	0.045809	0.992403	1158	2	0.82372
FBgn0266388	4	0.75019	0.74998	0.989455	12140	1	0.087148	0.024936	0.066431	0.992403	1159	2	0.087148
FBgn0261238	6	0.42935	0.58754	0.988564	8829	2	-0.12826	0.024964	0.080251	0.99685	1160	2	-0.12826
FBgn0036805	6	0.98464	0.98467	0.999085	15388	0	0.40382	0.024997	0.08032	0.99685	1161	4	0.40382
FBgn0031857	6	0.33603	0.51257	0.988564	7748	2	0.12748	0.025009	0.080355	0.99685	1162	3	0.12748
FBgn0264502	5	0.34279	0.49031	0.988564	7945	2	0.94631	0.025048	0.076453	0.99685	1163	3	0.94631
FBgn0003249	6	0.57089	0.70744	0.989455	10626	1	0.3608	0.02505	0.080454	0.99685	1164	3	0.3608
FBgn0034766	6	0.52315	0.66578	0.988564	9937	1	0.29489	0.025115	0.080613	0.99685	1165	3	0.29489
FBgn0036985	5	0.94824	0.94845	0.998342	14805	0	0.31037	0.025122	0.076661	0.99685	1166	4	0.31037
FBgn0267562	4	0.77093	0.77032	0.989455	12420	0	0.20071	0.025123	0.066834	0.992403	1167	2	0.20071
FBgn0039977	6	0.0033825	0.014448	0.925317	234	1	0.19302	0.025164	0.080748	0.99685	1168	3	0.19302
FBgn0038526	6	0.25465	0.44621	0.986685	6697	2	0.25767	0.02519	0.08081	0.99685	1169	3	0.25767
FBgn0033427	4	0.41282	0.5221	0.988564	8682	1	0.82356	0.025216	0.067038	0.992403	1170	3	0.82356
FBgn0039084	6	0.41231	0.57364	0.988564	8676	2	0.34337	0.025216	0.080876	0.99685	1171	3	0.34337
FBgn0001169	6	0.90337	0.90314	0.998342	14141	0	0.34742	0.025268	0.080999	0.99685	1172	4	0.34742
FBgn0032701	6	0.92303	0.92281	0.998342	14427	0	0.70782	0.025294	0.081068	0.99685	1173	4	0.70782
FBgn0053191	6	0.7809	0.8068	0.989455	12538	1	0.50038	0.025361	0.081234	0.99685	1174	4	0.50038
FBgn0032945	6	0.53009	0.67177	0.988564	10013	1	0.32852	0.025364	0.081249	0.99685	1175	4	0.32852
FBgn0033192	6	0.076318	0.19492	0.979758	2860	3	-0.085469	0.025434	0.081425	0.99685	1176	2	-0.085469
FBgn0032485	6	0.23471	0.41965	0.979758	6193	2	0.23049	0.025437	0.081434	0.99685	1177	3	0.23049
FBgn0037855	6	0.41076	0.57238	0.988564	8664	2	-0.040156	0.025437	0.081434	0.99685	1178	2	-0.040156
FBgn0053544	6	0.56464	0.70191	0.988564	10288	2	-0.17724	0.025539	0.08167	0.99685	1179	1	-0.17724
FBgn0054044	4	0.93041	0.93001	0.998342	14530	0	0.29123	0.025543	0.067728	0.992403	1180	2	0.29123
FBgn0029870	6	0.72598	0.77762	0.989455	11955	1	0.72093	0.025551	0.081704	0.99685	1181	4	0.72093
FBgn0036138	6	0.20889	0.38484	0.979758	5765	1	0.24115	0.025604	0.081824	0.99685	1182	3	0.24115
FBgn0046880	6	0.9748	0.97484	0.999027	15248	0	0.42349	0.025663	0.081971	0.99685	1183	4	0.42349
FBgn0032262	6	0.90735	0.90703	0.998342	14203	0	0.39629	0.025694	0.082054	0.99685	1184	4	0.39629
FBgn0037512	6	0.59349	0.72339	0.989455	10808	1	0.56334	0.025694	0.082054	0.99685	1185	4	0.56334
FBgn0033170	4	0.67811	0.68706	0.988564	11518	1	0.51789	0.025746	0.068148	0.992403	1186	2	0.51789
FBgn0034045	6	0.24289	0.43067	0.979758	6501	3	-0.45392	0.025764	0.082223	0.99685	1187	2	-0.45392
FBgn0036605	6	0.052135	0.1433	0.967275	2130	1	0.45996	0.025765	0.082225	0.99685	1188	4	0.45996
FBgn0052099	6	0.11237	0.24885	0.979758	3734	2	0.56011	0.025765	0.082225	0.99685	1189	4	0.56011
FBgn0015797	6	0.45353	0.60738	0.988564	9103	1	0.50289	0.025765	0.082225	0.99685	1190	4	0.50289
FBgn0017578	6	0.49952	0.64566	0.988564	9634	1	0.29126	0.025874	0.082499	0.99685	1191	3	0.29126
FBgn0035231	6	0.10283	0.23473	0.979758	3515	1	0.19223	0.025874	0.082499	0.99685	1192	3	0.19223
FBgn0263412	4	0.52664	0.5841	0.988564	9963	1	0.52093	0.025889	0.068451	0.992403	1193	3	0.52093
FBgn0030551	5	0.69601	0.72853	0.989455	11667	1	0.9806	0.025898	0.078775	0.99685	1194	3	0.9806
FBgn0259226	6	0.68806	0.76041	0.989455	11595	1	0.023516	0.025922	0.082612	0.99685	1195	2	0.023516
FBgn0250732	6	0.84545	0.85033	0.989455	13309	1	-0.009219	0.025992	0.082794	0.99685	1196	1	-0.009219
FBgn0016701	3	0.20728	0.31891	0.979758	5734	2	-0.44582	0.025996	0.066132	0.992403	1197	1	-0.44582
FBgn0030683	5	0.75499	0.76778	0.989455	12291	1	0.13192	0.02605	0.079195	0.99685	1198	1	0.13192
FBgn0038262	5	0.28355	0.4338	0.982302	7087	1	0.50981	0.026066	0.079244	0.99685	1199	4	0.50981
FBgn0036162	6	0.40924	0.57114	0.988564	8647	1	0.032141	0.026097	0.083038	0.99685	1200	2	0.032141
FBgn0031603	4	0.40236	0.51693	0.988564	8581	1	0.70718	0.026109	0.068916	0.992403	1201	3	0.70718
FBgn0026756	6	0.84894	0.85307	0.989455	13355	1	0.40113	0.026168	0.083201	0.99685	1202	4	0.40113
FBgn0085225	6	0.51824	0.66162	0.988564	9870	1	0.4863	0.0262	0.083283	0.99685	1203	4	0.4863
FBgn0264711	6	0.10705	0.24097	0.979758	3624	3	-0.27935	0.026201	0.083287	0.99685	1204	2	-0.27935
FBgn0002941	6	0.67681	0.75558	0.989455	11509	1	0.37047	0.026256	0.083411	0.99685	1205	3	0.37047
FBgn0000287	6	0.98816	0.98817	0.999085	15442	0	0.55263	0.02627	0.083448	0.99685	1206	3	0.55263
FBgn0033186	6	0.91263	0.91235	0.998342	14280	0	0.39236	0.026305	0.083535	0.99685	1207	4	0.39236
FBgn0033573	6	0.91681	0.91648	0.998342	14336	0	0.30673	0.026369	0.083691	0.99685	1208	4	0.30673
FBgn0267264	4	0.94426	0.94404	0.998342	14746	0	0.6549	0.026388	0.069507	0.992403	1209	3	0.6549
FBgn0264826	4	0.24259	0.36756	0.979758	6311	1	0.65154	0.026428	0.069587	0.992403	1210	2	0.65154
FBgn0036380	6	0.98605	0.9861	0.999085	15408	0	0.34848	0.026449	0.083891	0.99685	1211	3	0.34848
FBgn0262782	5	0.074457	0.17132	0.967275	2831	1	0.44423	0.026508	0.080493	0.99685	1212	4	0.44423
FBgn0065083	4	0.90181	0.90137	0.998342	14114	0	0.44867	0.02652	0.069778	0.992403	1213	3	0.44867
FBgn0038797	7	0.9856	0.98557	0.999085	15400	0	0.43739	0.026524	0.091229	0.99685	1214	5	0.43739
FBgn0015338	6	0.13829	0.28638	0.979758	4324	1	0.40041	0.026537	0.084097	0.99685	1215	4	0.40041
FBgn0052264	12	0.62246	0.81918	0.989455	11044	2	0.26324	0.026541	0.10853	0.99685	1216	5	0.26324
FBgn0038181	6	0.93695	0.93687	0.998342	14634	0	0.24494	0.026594	0.08423	0.99685	1217	3	0.24494
FBgn0034231	6	0.94645	0.94626	0.998342	14779	0	0.59711	0.026608	0.084267	0.99685	1218	4	0.59711
FBgn0032966	5	0.076466	0.17481	0.967275	2862	3	-0.55451	0.026661	0.08092	0.99685	1219	1	-0.55451
FBgn0003448	6	0.70849	0.76938	0.989455	11781	1	0.63607	0.026693	0.084472	0.99685	1220	4	0.63607
FBgn0028569	6	0.24289	0.43067	0.979758	6362	3	-0.18175	0.026759	0.084638	0.99685	1221	2	-0.18175
FBgn0034639	6	0.56464	0.70191	0.988564	10568	2	0.47914	0.026764	0.08465	0.99685	1222	3	0.47914
FBgn0262360	6	0.87515	0.8755	0.989455	13588	1	0.056717	0.026801	0.084727	0.99685	1223	3	0.056717
FBgn0038640	6	0.16913	0.32988	0.979758	4984	1	0.53756	0.026802	0.08473	0.99685	1224	4	0.53756
FBgn0047199	6	0.74719	0.78828	0.989455	12093	1	0.48933	0.026802	0.08473	0.99685	1225	4	0.48933
FBgn0038360	6	0.20626	0.38133	0.979758	5700	3	0.18169	0.026829	0.084802	0.99685	1226	3	0.18169
FBgn0040759	6	0.48558	0.634	0.988564	9497	1	0.53395	0.026834	0.084814	0.99685	1227	4	0.53395
FBgn0038057	4	0.68903	0.69591	0.988564	11603	1	0.54042	0.02684	0.070474	0.992403	1228	3	0.54042
FBgn0266647	1	0.97313	0.97327	0.998526	15225	0	2.1036	0.026867	0.026803	0.992403	1229	1	2.1036
FBgn0042146	6	0.56464	0.70191	0.988564	10512	2	0.42892	0.026899	0.084992	0.99685	1230	4	0.42892
FBgn0264792	4	0.26208	0.38969	0.979758	6794	1	0.71157	0.026941	0.070686	0.992403	1231	2	0.71157
FBgn0034180	6	0.87515	0.8755	0.989455	13753	1	0.27099	0.026968	0.085149	0.99685	1232	3	0.27099
FBgn0051788	6	0.97304	0.97309	0.998526	15224	0	0.44255	0.026992	0.085195	0.99685	1233	4	0.44255
FBgn0033598	6	0.50265	0.64832	0.988564	9689	1	0.5441	0.026992	0.085195	0.99685	1234	4	0.5441
FBgn0038585	6	0.62356	0.73435	0.989455	11054	1	-0.11937	0.026994	0.085199	0.99685	1235	2	-0.11937
FBgn0039449	4	0.10462	0.20964	0.979758	3560	2	0.12963	0.026995	0.070801	0.992403	1236	2	0.12963
FBgn0026418	4	0.19321	0.31146	0.979758	5451	2	-0.16429	0.027034	0.070891	0.992403	1237	2	-0.16429
FBgn0037976	6	0.44981	0.60431	0.988564	9056	1	0.38216	0.027062	0.085343	0.99685	1238	4	0.38216
FBgn0250869	6	0.010225	0.039296	0.950637	605	1	0.35889	0.027121	0.085493	0.99685	1239	3	0.35889
FBgn0051363	8	0.98475	0.98474	0.999085	15390	0	0.31122	0.027172	0.095526	0.99685	1240	5	0.31122
FBgn0037398	6	0.87515	0.8755	0.989455	13578	1	0.61426	0.027196	0.08568	0.99685	1241	4	0.61426
FBgn0037251	4	0.29989	0.43264	0.981246	7303	2	0.26659	0.027197	0.071264	0.992403	1242	2	0.26659
FBgn0265910	4	0.45902	0.54613	0.988564	9194	1	0.40486	0.027208	0.071292	0.992403	1243	3	0.40486
FBgn0015925	6	0.48778	0.63585	0.988564	9516	2	0.081998	0.027215	0.085735	0.99685	1244	2	0.081998
FBgn0039207	6	0.38459	0.55118	0.988564	8387	2	-0.022218	0.027215	0.085735	0.99685	1245	2	-0.022218
FBgn0264946	4	0.86545	0.86507	0.989455	13520	0	0.51502	0.027225	0.071335	0.992403	1246	3	0.51502
FBgn0030834	6	0.00017827	0.00098617	0.724579	13	2	0.08087	0.027247	0.085815	0.99685	1247	2	0.08087
FBgn0031651	6	0.24289	0.43067	0.979758	6430	3	0.042213	0.027302	0.085964	0.99685	1248	3	0.042213
FBgn0039147	6	0.96442	0.96447	0.998342	15080	0	0.051908	0.027302	0.085964	0.99685	1249	2	0.051908
FBgn0262681	4	0.13813	0.2483	0.979758	4321	2	-0.27319	0.02736	0.071617	0.992403	1250	1	-0.27319
FBgn0264363	6	0.52315	0.66578	0.988564	9934	2	0.33406	0.027387	0.086192	0.99685	1251	3	0.33406
FBgn0267065	4	0.81491	0.81441	0.989455	12936	0	0.57728	0.027406	0.071715	0.992403	1252	2	0.57728
FBgn0052302	6	0.90954	0.90922	0.998342	14234	0	0.5354	0.027444	0.08635	0.99685	1253	4	0.5354
FBgn0004583	6	0.33828	0.51442	0.988564	7905	2	0.16181	0.027477	0.086426	0.99685	1254	3	0.16181
FBgn0267063	4	0.91057	0.91028	0.998342	14243	0	0.4448	0.027522	0.071956	0.992403	1255	3	0.4448
FBgn0264391	4	0.85471	0.85425	0.989455	13439	0	0.33432	0.027535	0.071987	0.992403	1256	2	0.33432
FBgn0052488	6	0.43327	0.59085	0.988564	8887	2	0.21669	0.027538	0.086579	0.99685	1257	3	0.21669
FBgn0004456	1	0.97246	0.97258	0.998526	15215	0	1.4616	0.027538	0.027458	0.992403	1258	1	1.4616
FBgn0263869	4	0.1938	0.31214	0.979758	5463	2	-0.090817	0.027544	0.07201	0.992403	1259	2	-0.090817
FBgn0035234	6	0.46956	0.62064	0.988564	9312	2	0.31789	0.027612	0.086761	0.99685	1260	3	0.31789
FBgn0021800	6	0.30315	0.4869	0.988564	7355	2	-0.073706	0.027666	0.086887	0.99685	1261	2	-0.073706
FBgn0025878	6	0.94792	0.94775	0.998342	14799	0	0.48764	0.027721	0.087024	0.99685	1262	4	0.48764
FBgn0000241	6	0.14807	0.30021	0.979758	4538	2	0.25812	0.027729	0.087047	0.99685	1263	3	0.25812
FBgn0034940	4	0.87755	0.87712	0.991021	13856	0	0.36676	0.027732	0.072437	0.992403	1264	2	0.36676
FBgn0267914	4	0.3063	0.43991	0.985958	7405	1	0.7511	0.027763	0.0725	0.992403	1265	2	0.7511
FBgn0267027	4	0.98812	0.98811	0.999085	15440	0	0.91627	0.027763	0.0725	0.992403	1266	3	0.91627
FBgn0037336	6	0.57382	0.71	0.989455	10653	1	0.44617	0.027766	0.087138	0.99685	1267	3	0.44617
FBgn0029727	6	0.069459	0.18235	0.977578	2707	2	0.075436	0.027805	0.087225	0.99685	1268	2	0.075436
FBgn0022984	4	0.95759	0.95742	0.998342	14985	0	0.53352	0.027846	0.072693	0.992403	1269	3	0.53352
FBgn0015372	4	0.078527	0.17422	0.967275	2937	3	-0.55106	0.027988	0.072974	0.992403	1270	1	-0.55106
FBgn0031882	6	0.10146	0.23269	0.979758	3488	3	0.051524	0.028014	0.087744	0.99685	1271	3	0.051524
FBgn0031493	4	0.78036	0.77976	0.989455	12533	0	0.70441	0.028054	0.073116	0.992403	1272	3	0.70441
FBgn0030278	6	0.99678	0.99675	0.999157	15586	0	0.50465	0.028078	0.087895	0.99685	1273	4	0.50465
FBgn0031896	6	0.97268	0.97277	0.998526	15217	0	0.51416	0.028078	0.087895	0.99685	1274	4	0.51416
FBgn0036153	6	0.59251	0.72305	0.989455	10803	1	0.24424	0.028079	0.087897	0.99685	1275	3	0.24424
FBgn0264507	4	0.86224	0.86191	0.989455	13508	0	0.55174	0.028136	0.073288	0.992403	1276	3	0.55174
FBgn0038876	6	0.81679	0.82948	0.989455	12960	1	0.085248	0.028147	0.088058	0.99685	1277	2	0.085248
FBgn0065081	4	0.9802	0.98019	0.999085	15324	0	0.69967	0.028192	0.073398	0.992403	1278	3	0.69967
FBgn0263133	6	0.25715	0.44953	0.986685	6736	2	0.29115	0.028208	0.088217	0.99685	1279	3	0.29115
FBgn0000568	16	0.2963	0.60171	0.988564	7259	6	-0.091576	0.028218	0.12589	0.998848	1280	5	-0.091576
FBgn0034166	6	0.06852	0.18025	0.974252	2688	2	0.15655	0.028292	0.08841	0.99685	1281	2	0.15655
FBgn0264487	6	0.59755	0.72483	0.989455	10844	1	0.6114	0.028297	0.088424	0.99685	1282	4	0.6114
FBgn0030596	6	0.11079	0.24646	0.979758	3699	2	-0.36804	0.028362	0.088596	0.99685	1283	1	-0.36804
FBgn0031000	6	0.065626	0.17381	0.967275	2616	1	0.5754	0.028409	0.088705	0.99685	1284	3	0.5754
FBgn0031998	6	0.56464	0.70191	0.988564	10559	2	0.44724	0.028409	0.088705	0.99685	1285	3	0.44724
FBgn0032512	4	0.11555	0.22228	0.979758	3811	1	-0.18451	0.02843	0.073893	0.996314	1286	1	-0.18451
FBgn0039555	6	0.94776	0.94759	0.998342	14795	0	-0.013049	0.028434	0.088763	0.99685	1287	2	-0.013049
FBgn0001977	3	0.80765	0.80728	0.989455	12855	0	0.61218	0.028443	0.071859	0.992403	1288	2	0.61218
FBgn0034052	6	0.24617	0.43494	0.982972	6584	2	-0.025476	0.028488	0.0889	0.99685	1289	2	-0.025476
FBgn0038719	6	0.92921	0.92905	0.998342	14508	0	0.46878	0.028497	0.088922	0.99685	1290	4	0.46878
FBgn0052625	6	0.41726	0.57762	0.988564	8725	2	-0.12149	0.028536	0.089014	0.99685	1291	2	-0.12149
FBgn0050157	3	0.8957	0.89577	0.998342	14013	0	1.1663	0.028569	0.072154	0.992403	1292	2	1.1663
FBgn0037734	6	0.82961	0.83851	0.989455	13116	1	0.51908	0.028622	0.089233	0.99685	1293	4	0.51908
FBgn0052563	6	0.51771	0.66115	0.988564	9863	2	0.11639	0.02863	0.089251	0.99685	1294	3	0.11639
FBgn0013675	2	0.97135	0.97126	0.998526	15200	0	1.1246	0.028646	0.05236	0.992403	1295	2	1.1246
FBgn0027611	6	0.25799	0.45065	0.986685	6747	2	0.34984	0.028675	0.08937	0.99685	1296	3	0.34984
FBgn0024432	6	0.77333	0.80247	0.989455	12445	1	0.40446	0.028675	0.08937	0.99685	1297	3	0.40446
FBgn0051759	6	0.71356	0.77175	0.989455	11830	1	0.31087	0.028675	0.08937	0.99685	1298	4	0.31087
FBgn0036225	6	0.80439	0.82127	0.989455	12818	1	-0.10961	0.028675	0.08937	0.99685	1299	2	-0.10961
FBgn0011481	6	0.85838	0.86071	0.989455	13481	1	0.46101	0.028682	0.089392	0.99685	1300	4	0.46101
FBgn0004924	10	0.53804	0.74537	0.989455	10084	3	-0.11909	0.028682	0.1083	0.99685	1301	2	-0.11909
FBgn0024956	6	0.80399	0.82103	0.989455	12812	1	0.75384	0.0287	0.089433	0.99685	1302	4	0.75384
FBgn0085193	2	0.23495	0.26643	0.979758	6198	1	0.93354	0.028731	0.052511	0.992403	1303	1	0.93354
FBgn0000228	6	0.83261	0.8407	0.989455	13149	1	0.30669	0.028781	0.089655	0.99685	1304	3	0.30669
FBgn0045073	4	0.62824	0.64979	0.988564	11085	1	0.47343	0.028866	0.074846	0.99685	1305	3	0.47343
FBgn0034877	6	0.20209	0.3757	0.979758	5620	1	0.37888	0.028919	0.089986	0.99685	1306	3	0.37888
FBgn0039740	6	0.53996	0.68036	0.988564	10097	1	0.41483	0.028945	0.090048	0.99685	1307	3	0.41483
FBgn0042186	5	0.12382	0.25445	0.979758	4019	3	-0.44287	0.028949	0.087119	0.99685	1308	2	-0.44287
FBgn0030276	4	0.89709	0.89667	0.998342	14037	0	0.36815	0.028956	0.075046	0.99685	1309	3	0.36815
FBgn0039736	6	0.87515	0.8755	0.989455	13809	1	9.9272e-05	0.029058	0.090343	0.99685	1310	2	9.9272e-05
FBgn0003517	4	0.035598	0.088044	0.951196	1595	1	0.52523	0.029066	0.075268	0.99685	1311	3	0.52523
FBgn0266236	4	0.15853	0.27168	0.979758	4770	1	0.62154	0.029066	0.075268	0.99685	1312	3	0.62154
FBgn0263449	4	0.88348	0.88304	0.995238	13888	0	0.77596	0.029094	0.075341	0.99685	1313	3	0.77596
FBgn0033907	4	0.75019	0.74998	0.989455	12235	1	0.4484	0.029128	0.075409	0.99685	1314	2	0.4484
FBgn0039054	6	0.45808	0.61113	0.988564	9182	2	0.48541	0.029183	0.09063	0.99685	1315	4	0.48541
FBgn0263326	6	0.81221	0.82646	0.989455	12912	1	0.28829	0.029206	0.09069	0.99685	1316	3	0.28829
FBgn0032217	4	0.50817	0.57334	0.988564	9754	1	0.299	0.029244	0.075661	0.99685	1317	2	0.299
FBgn0034745	6	0.00017994	0.00099821	0.724579	14	5	-1.0917	0.029266	0.090841	0.99685	1318	1	-1.0917
FBgn0283651	7	0.91173	0.91193	0.998342	14263	1	0.48111	0.029274	0.099146	0.99685	1319	5	0.48111
FBgn0085329	6	0.56464	0.70191	0.988564	10295	2	0.56339	0.029325	0.090981	0.99685	1320	4	0.56339
FBgn0027544	2	0.9496	0.94943	0.998342	14831	0	0.73608	0.029434	0.053761	0.992403	1321	2	0.73608
FBgn0033788	6	0.50391	0.64943	0.988564	9702	1	0.52399	0.029461	0.091318	0.99685	1322	4	0.52399
FBgn0030001	4	0.54035	0.59218	0.988564	10103	1	0.56069	0.02952	0.076216	0.99685	1323	3	0.56069
FBgn0037292	6	0.87515	0.8755	0.989455	13719	1	0.13977	0.029529	0.091487	0.99685	1324	3	0.13977
FBgn0265767	9	0.40018	0.62584	0.988564	8562	2	0.46943	0.029544	0.10983	0.99685	1325	6	0.46943
FBgn0265903	4	0.49998	0.56871	0.988564	9643	1	0.040951	0.029546	0.076285	0.99685	1326	2	0.040951
FBgn0011283	6	0.047213	0.13197	0.967275	1967	2	0.2973	0.029551	0.091545	0.99685	1327	4	0.2973
FBgn0031305	2	0.97039	0.97031	0.998471	15185	0	0.65599	0.029606	0.054084	0.992403	1328	2	0.65599
FBgn0036422	6	0.45262	0.60659	0.988564	9091	2	0.19096	0.029614	0.091695	0.99685	1329	3	0.19096
FBgn0086904	7	0.29715	0.50013	0.988564	7267	2	0.27437	0.029625	0.10016	0.99685	1330	4	0.27437
FBgn0029539	6	0.90844	0.9081	0.998342	14221	0	0.39315	0.029705	0.091926	0.99685	1331	3	0.39315
FBgn0039321	6	0.17309	0.33552	0.979758	5065	1	0.49229	0.029705	0.091926	0.99685	1332	3	0.49229
FBgn0037465	4	0.97764	0.97758	0.999085	15288	0	0.34806	0.029709	0.076632	0.99685	1333	2	0.34806
FBgn0264298	2	0.85928	0.85894	0.989455	13490	0	1.0587	0.02975	0.054312	0.992403	1334	1	1.0587
FBgn0023526	5	0.99445	0.99447	0.999085	15552	0	0.38492	0.02981	0.089363	0.99685	1335	4	0.38492
FBgn0267114	4	0.84913	0.84862	0.989455	13363	0	0.48038	0.029811	0.076854	0.99685	1336	3	0.48038
FBgn0050472	6	0.62822	0.73611	0.989455	11084	1	0.51952	0.029824	0.092216	0.99685	1337	4	0.51952
FBgn0267111	4	0.11494	0.22156	0.979758	3794	1	0.64796	0.029852	0.076945	0.99685	1338	3	0.64796
FBgn0039827	6	0.38354	0.55032	0.988564	8375	2	0.07829	0.029858	0.092285	0.99685	1339	2	0.07829
FBgn0035016	6	0.64224	0.7415	0.989455	11211	1	0.40979	0.029858	0.092285	0.99685	1340	3	0.40979
FBgn0024980	6	0.93333	0.93317	0.998342	14580	0	0.0022848	0.029858	0.092285	0.99685	1341	2	0.0022848
FBgn0031875	6	0.068285	0.17974	0.973921	2680	1	0.045778	0.029858	0.092285	0.99685	1342	2	0.045778
FBgn0039434	6	0.96034	0.96038	0.998342	15020	0	0.12316	0.029863	0.092302	0.99685	1343	3	0.12316
FBgn0039543	4	0.90877	0.90845	0.998342	14223	0	0.662	0.029915	0.077083	0.99685	1344	3	0.662
FBgn0052750	6	0.66056	0.74881	0.989455	11380	1	0.59138	0.029939	0.092503	0.99685	1345	4	0.59138
FBgn0046875	6	0.49804	0.64447	0.988564	9620	2	0.34475	0.029989	0.092607	0.99685	1346	3	0.34475
FBgn0033215	6	0.31855	0.49883	0.988564	7547	1	0.48537	0.030031	0.092712	0.99685	1347	4	0.48537
FBgn0034277	6	0.90866	0.90831	0.998342	14222	0	-0.06357	0.030101	0.092867	0.99685	1348	1	-0.06357
FBgn0030351	6	0.49165	0.63908	0.988564	9550	2	0.13697	0.03015	0.092985	0.99685	1349	3	0.13697
FBgn0265377	4	0.0066864	0.022811	0.926279	412	1	0.036629	0.03015	0.077583	0.99685	1350	1	0.036629
FBgn0014465	6	0.13785	0.28579	0.979758	4318	2	0.61583	0.030164	0.093013	0.99685	1351	3	0.61583
FBgn0011661	14	0.62324	0.84086	0.989455	11051	4	0.11211	0.030185	0.1267	0.998848	1352	4	0.11211
FBgn0027507	5	0.15744	0.30901	0.979758	4757	1	0.91495	0.030219	0.09047	0.99685	1353	3	0.91495
FBgn0039024	6	0.49463	0.64163	0.988564	9580	1	0.48524	0.030271	0.093269	0.99685	1354	4	0.48524
FBgn0033544	8	0.43049	0.64481	0.988564	8838	3	-0.23339	0.030302	0.10407	0.99685	1355	2	-0.23339
FBgn0260400	7	0.95194	0.95185	0.998342	14877	0	0.27842	0.030347	0.10225	0.99685	1356	4	0.27842
FBgn0264565	4	0.42525	0.52841	0.988564	8796	1	-0.25847	0.030383	0.078072	0.99685	1357	1	-0.25847
FBgn0052351	6	0.26422	0.457	0.986685	6828	2	0.13124	0.030449	0.093719	0.99685	1358	2	0.13124
FBgn0005771	6	0.16962	0.33057	0.979758	4997	3	-0.14404	0.030607	0.09412	0.99685	1359	2	-0.14404
FBgn0263846	6	0.3567	0.5289	0.988564	8096	2	0.34139	0.030608	0.09412	0.99685	1360	4	0.34139
FBgn0264075	6	0.96501	0.96508	0.998342	15099	0	0.43585	0.030652	0.094222	0.99685	1361	4	0.43585
FBgn0261988	6	0.29542	0.48102	0.988564	7247	2	0.25912	0.030652	0.094222	0.99685	1362	4	0.25912
FBgn0031115	6	0.53856	0.67915	0.988564	10090	1	0.33785	0.030652	0.094222	0.99685	1363	4	0.33785
FBgn0010226	8	0.38316	0.5982	0.988564	8368	3	-0.022838	0.030685	0.10513	0.99685	1364	3	-0.022838
FBgn0052088	6	0.99576	0.99578	0.999105	15575	0	0.4129	0.030704	0.094334	0.99685	1365	3	0.4129
FBgn0266308	4	0.93918	0.9389	0.998342	14669	0	0.57191	0.030746	0.078815	0.99685	1366	3	0.57191
FBgn0036301	6	0.37391	0.54265	0.988564	8263	2	0.75738	0.030792	0.094528	0.99685	1367	4	0.75738
FBgn0022985	4	0.93172	0.93133	0.998342	14552	0	0.36761	0.030801	0.078929	0.99685	1368	3	0.36761
FBgn0001978	6	0.56464	0.70191	0.988564	10483	2	0.44738	0.030825	0.094592	0.99685	1369	4	0.44738
FBgn0010263	8	0.056685	0.1714	0.967275	2267	3	0.47003	0.030902	0.10573	0.99685	1370	5	0.47003
FBgn0032191	6	0.060594	0.1626	0.967275	2373	2	-0.034408	0.030918	0.094794	0.99685	1371	2	-0.034408
FBgn0266414	4	0.91618	0.91588	0.998342	14322	0	1.067	0.030935	0.079233	0.99685	1372	3	1.067
FBgn0261508	6	0.84819	0.85248	0.989455	13343	1	0.46666	0.031003	0.094988	0.99685	1373	3	0.46666
FBgn0028946	6	0.20703	0.38235	0.979758	5716	3	-0.16338	0.03106	0.095121	0.99685	1374	2	-0.16338
FBgn0051606	6	0.39162	0.55692	0.988564	8484	2	0.71155	0.031075	0.095156	0.99685	1375	4	0.71155
FBgn0030434	6	0.84819	0.85248	0.989455	13338	1	0.14937	0.031088	0.095183	0.99685	1376	3	0.14937
FBgn0033468	6	0.84126	0.84719	0.989455	13260	1	0.54522	0.031094	0.095198	0.99685	1377	3	0.54522
FBgn0000036	6	0.38617	0.55245	0.988564	8400	2	0.17048	0.031094	0.095198	0.99685	1378	3	0.17048
FBgn0038720	14	0.80747	0.92539	0.998342	12851	2	0.26807	0.031125	0.12986	0.998848	1379	7	0.26807
FBgn0267653	4	0.6985	0.70365	0.989422	11687	1	-0.093579	0.031126	0.079635	0.99685	1380	1	-0.093579
FBgn0019624	4	0.86945	0.86904	0.989455	13545	0	0.74787	0.031135	0.079657	0.99685	1381	3	0.74787
FBgn0265978	4	0.58824	0.62242	0.988564	10763	1	0.35763	0.031138	0.079663	0.99685	1382	2	0.35763
FBgn0040153	6	0.56464	0.70191	0.988564	10376	2	0.00055102	0.031178	0.09538	0.99685	1383	3	0.00055102
FBgn0052703	6	0.95953	0.95955	0.998342	15007	0	0.47253	0.031178	0.09538	0.99685	1384	4	0.47253
FBgn0035886	6	0.65972	0.74846	0.989455	11372	1	0.17324	0.031178	0.09538	0.99685	1385	2	0.17324
FBgn0052068	6	0.80985	0.8249	0.989455	12881	1	0.54264	0.031178	0.09538	0.99685	1386	3	0.54264
FBgn0035640	6	0.36156	0.53281	0.988564	8156	2	-0.22874	0.031178	0.09538	0.99685	1387	2	-0.22874
FBgn0033287	6	0.70084	0.76598	0.989455	11707	1	0.3915	0.031178	0.09538	0.99685	1388	3	0.3915
FBgn0035316	6	0.4335	0.59104	0.988564	8891	2	0.0036285	0.031178	0.09538	0.99685	1389	1	0.0036285
FBgn0039520	6	0.69744	0.76443	0.989455	11676	1	0.46521	0.031238	0.095522	0.99685	1390	4	0.46521
FBgn0065035	2	0.12621	0.18257	0.977579	4063	1	-0.068148	0.031295	0.056949	0.992403	1391	1	-0.068148
FBgn0053300	6	0.77524	0.80354	0.989455	12467	1	0.42923	0.03131	0.095686	0.99685	1392	4	0.42923
FBgn0023076	6	0.7348	0.78198	0.989455	12020	1	0.52497	0.03131	0.095686	0.99685	1393	4	0.52497
FBgn0039424	6	0.80985	0.8249	0.989455	12875	1	0.41031	0.031372	0.095835	0.99685	1394	4	0.41031
FBgn0000454	8	0.23013	0.44437	0.986685	6125	2	0.33185	0.031379	0.10702	0.99685	1395	4	0.33185
FBgn0266966	4	0.27518	0.40467	0.979758	6964	2	-0.30348	0.031404	0.08023	0.99685	1396	1	-0.30348
FBgn0033226	10	0.070569	0.21167	0.979758	2736	2	0.07623	0.031432	0.11635	0.998848	1397	3	0.07623
FBgn0038584	6	0.99073	0.99075	0.999085	15487	0	0.39316	0.03144	0.095993	0.99685	1398	4	0.39316
FBgn0250823	6	0.10944	0.24447	0.979758	3678	3	-0.074708	0.031506	0.096142	0.99685	1399	3	-0.074708
FBgn0031478	5	0.023946	0.073317	0.950637	1163	3	-0.28617	0.031536	0.093948	0.99685	1400	1	-0.28617
FBgn0027795	6	0.94965	0.94953	0.998342	14834	0	0.31323	0.031538	0.096224	0.99685	1401	3	0.31323
FBgn0001321	6	0.8997	0.89949	0.998342	14074	0	0.42801	0.03179	0.096835	0.99685	1402	4	0.42801
FBgn0026319	6	0.98152	0.98153	0.999085	15345	0	0.47122	0.031809	0.096892	0.99685	1403	4	0.47122
FBgn0030310	6	0.015551	0.054477	0.950637	815	3	0.07394	0.031847	0.09698	0.99685	1404	3	0.07394
FBgn0035107	6	0.87515	0.8755	0.989455	13581	1	0.38069	0.031887	0.097084	0.99685	1405	3	0.38069
FBgn0040607	6	0.96595	0.96603	0.998342	15118	0	0.50143	0.031896	0.097109	0.99685	1406	4	0.50143
FBgn0085464	6	0.47404	0.62433	0.988564	9360	1	0.49281	0.031918	0.097168	0.99685	1407	3	0.49281
FBgn0267064	4	0.21441	0.3357	0.979758	5879	1	0.23998	0.031951	0.08134	0.99685	1408	2	0.23998
FBgn0033610	6	0.82353	0.83416	0.989455	13055	1	0.089515	0.031976	0.097313	0.99685	1409	1	0.089515
FBgn0038595	6	0.37849	0.5463	0.988564	8316	2	-0.002309	0.032017	0.097403	0.99685	1410	2	-0.002309
FBgn0052643	6	0.16913	0.32988	0.979758	4985	2	-0.13588	0.032046	0.097477	0.99685	1411	1	-0.13588
FBgn0015575	6	0.97278	0.97288	0.998526	15220	0	0.47998	0.032062	0.097517	0.99685	1412	4	0.47998
FBgn0014417	6	0.8934	0.89324	0.998342	13973	0	0.53642	0.032123	0.097666	0.99685	1413	4	0.53642
FBgn0015778	6	0.982	0.98203	0.999085	15354	0	0.33664	0.032133	0.097689	0.99685	1414	4	0.33664
FBgn0001220	4	0.16752	0.28193	0.979758	4952	2	-0.19879	0.032147	0.081736	0.99685	1415	2	-0.19879
FBgn0038092	6	0.42065	0.58043	0.988564	8755	1	-0.052015	0.03215	0.097732	0.99685	1416	2	-0.052015
FBgn0031571	6	0.89842	0.8982	0.998342	14057	0	0.42157	0.03215	0.097732	0.99685	1417	3	0.42157
FBgn0051464	5	0.12215	0.25173	0.979758	3972	2	-0.029643	0.032173	0.095614	0.99685	1418	2	-0.029643
FBgn0030801	6	0.99057	0.99061	0.999085	15484	0	0.33795	0.032204	0.097863	0.99685	1419	3	0.33795
FBgn0032184	6	0.99818	0.99811	0.999348	15607	0	0.37552	0.032215	0.097884	0.99685	1420	4	0.37552
FBgn0063496	6	0.29542	0.48102	0.988564	7246	2	0.42583	0.032215	0.097884	0.99685	1421	4	0.42583
FBgn0267754	4	0.96182	0.96161	0.998342	15041	0	0.36009	0.032228	0.081924	0.99685	1422	3	0.36009
FBgn0034546	6	0.016255	0.056286	0.950637	843	2	0.19234	0.032246	0.097967	0.99685	1423	3	0.19234
FBgn0033891	4	0.80115	0.80065	0.989455	12779	0	0.36055	0.032261	0.081978	0.99685	1424	3	0.36055
FBgn0031688	6	0.94887	0.94871	0.998342	14819	0	0.18506	0.032289	0.098067	0.99685	1425	3	0.18506
FBgn0027280	6	0.24289	0.43067	0.979758	6406	3	-0.034162	0.032289	0.098067	0.99685	1426	2	-0.034162
FBgn0259847	2	0.96768	0.96764	0.998471	15143	0	0.96449	0.032322	0.058776	0.992403	1427	2	0.96449
FBgn0267764	4	0.67901	0.68776	0.988564	11529	1	0.45227	0.032327	0.082131	0.99685	1428	3	0.45227
FBgn0031467	4	0.8659	0.8655	0.989455	13524	0	0.19468	0.032356	0.082178	0.99685	1429	2	0.19468
FBgn0035110	6	0.33989	0.51566	0.988564	7919	1	0.17021	0.03237	0.098273	0.99685	1430	3	0.17021
FBgn0263239	6	0.097897	0.22745	0.979758	3417	3	-0.048996	0.03237	0.098273	0.99685	1431	3	-0.048996
FBgn0034910	6	0.18236	0.34852	0.979758	5250	1	0.185	0.03237	0.098273	0.99685	1432	3	0.185
FBgn0033706	6	0.1313	0.27641	0.979758	4177	2	0.17169	0.03237	0.098273	0.99685	1433	3	0.17169
FBgn0003248	5	0.8916	0.89193	0.998342	13949	0	-0.057713	0.032403	0.096215	0.99685	1434	2	-0.057713
FBgn0035189	6	0.30035	0.48475	0.988564	7308	1	0.35176	0.032416	0.098388	0.99685	1435	3	0.35176
FBgn0038391	6	0.17619	0.33991	0.979758	5116	1	0.23651	0.032532	0.098676	0.99685	1436	3	0.23651
FBgn0036767	6	0.41592	0.57653	0.988564	8715	1	0.28755	0.032543	0.098705	0.99685	1437	4	0.28755
FBgn0023509	6	0.11746	0.25646	0.979758	3858	1	0.049777	0.032601	0.098829	0.99685	1438	2	0.049777
FBgn0266229	4	0.0032052	0.011329	0.914045	223	1	0.1547	0.032611	0.082715	0.99685	1439	2	0.1547
FBgn0259221	13	0.89385	0.9515	0.998342	13983	1	0.11933	0.032614	0.13192	0.998848	1440	5	0.11933
FBgn0031449	10	0.59841	0.7901	0.989455	10849	3	0.30625	0.03265	0.11996	0.998848	1441	5	0.30625
FBgn0028562	6	0.45882	0.61176	0.988564	9190	2	0.13962	0.03267	0.098975	0.99685	1442	2	0.13962
FBgn0085366	6	0.50285	0.64849	0.988564	9690	1	0.42768	0.032672	0.098979	0.99685	1443	4	0.42768
FBgn0037171	6	0.49413	0.64121	0.988564	9577	2	0.4419	0.032672	0.098979	0.99685	1444	4	0.4419
FBgn0263087	1	0.96729	0.96757	0.998471	15139	0	1.0518	0.032708	0.032664	0.992403	1445	1	1.0518
FBgn0029664	6	0.54817	0.68757	0.988564	10151	1	0.11883	0.03274	0.09915	0.99685	1446	3	0.11883
FBgn0039071	6	0.52804	0.67002	0.988564	9990	1	0.93726	0.032747	0.099167	0.99685	1447	4	0.93726
FBgn0054012	6	0.40066	0.56422	0.988564	8570	2	0.40495	0.032747	0.099167	0.99685	1448	3	0.40495
FBgn0265667	4	0.93776	0.93751	0.998342	14651	0	0.50548	0.032766	0.08303	0.99685	1449	3	0.50548
FBgn0025802	6	0.19689	0.36849	0.979758	5524	3	-0.00038176	0.032809	0.099324	0.99685	1450	2	-0.00038176
FBgn0030359	6	0.94887	0.94871	0.998342	14817	0	0.44691	0.032892	0.099509	0.99685	1451	4	0.44691
FBgn0035610	5	0.85129	0.85162	0.989455	13391	0	0.040333	0.032925	0.097622	0.99685	1452	2	0.040333
FBgn0012037	6	0.91524	0.91493	0.998342	14311	0	0.36572	0.032931	0.09961	0.99685	1453	4	0.36572
FBgn0029858	6	0.76044	0.7953	0.989455	12342	1	0.38844	0.032939	0.099629	0.99685	1454	4	0.38844
FBgn0031855	6	0.87515	0.8755	0.989455	13722	1	0.32244	0.032948	0.099651	0.99685	1455	3	0.32244
FBgn0034458	6	0.053596	0.14669	0.967275	2177	4	-0.29603	0.033017	0.099812	0.99685	1456	1	-0.29603
FBgn0265143	4	0.17612	0.29182	0.979758	5112	1	-0.35155	0.033074	0.083681	0.99685	1457	1	-0.35155
FBgn0267336	6	0.17671	0.34066	0.979758	5127	3	0.19927	0.033075	0.099942	0.99685	1458	3	0.19927
FBgn0031247	4	0.060726	0.13924	0.967275	2376	1	0.46634	0.033138	0.083825	0.99685	1459	2	0.46634
FBgn0004584	4	0.89766	0.89725	0.998342	14040	0	0.99698	0.033138	0.083825	0.99685	1460	2	0.99698
FBgn0261953	9	0.29373	0.53523	0.988564	7222	3	-0.171	0.033147	0.12109	0.998848	1461	4	-0.171
FBgn0261789	6	0.081527	0.20278	0.979758	3048	3	-0.26831	0.033168	0.10016	0.99685	1462	2	-0.26831
FBgn0039900	7	0.014839	0.054868	0.950637	790	1	0.0076896	0.033172	0.11035	0.99685	1463	2	0.0076896
FBgn0034906	6	0.24289	0.43067	0.979758	6505	3	-0.20832	0.03319	0.10021	0.99685	1464	2	-0.20832
FBgn0039255	6	0.83541	0.8428	0.989455	13180	1	0.3683	0.033252	0.10034	0.99685	1465	4	0.3683
FBgn0022800	6	0.50994	0.65457	0.988564	9777	2	0.26628	0.033292	0.10044	0.99685	1466	3	0.26628
FBgn0263829	6	0.87515	0.8755	0.989455	13742	1	0.32445	0.033301	0.10046	0.99685	1467	3	0.32445
FBgn0032750	6	0.90667	0.90636	0.998342	14190	0	0.44085	0.033329	0.10053	0.99685	1468	4	0.44085
FBgn0038839	6	0.25688	0.44916	0.986685	6729	2	-0.040765	0.033336	0.10055	0.99685	1469	2	-0.040765
FBgn0036935	6	0.68031	0.75704	0.989455	11540	1	0.46431	0.033336	0.10055	0.99685	1470	3	0.46431
FBgn0032269	6	0.22801	0.41064	0.979758	6095	2	0.56586	0.033416	0.10073	0.99685	1471	4	0.56586
FBgn0039264	5	0.74758	0.76247	0.989455	12097	1	0.51372	0.033419	0.098903	0.99685	1472	3	0.51372
FBgn0001320	6	0.064566	0.17151	0.967275	2470	3	-0.32139	0.033433	0.10077	0.99685	1473	2	-0.32139
FBgn0026085	4	0.78585	0.78528	0.989455	12586	0	0.41111	0.033498	0.084585	0.99685	1474	3	0.41111
FBgn0030466	6	0.23387	0.41851	0.979758	6178	2	0.007743	0.033502	0.10094	0.99685	1475	3	0.007743
FBgn0053647	5	0.97011	0.97025	0.998471	15180	0	0.38776	0.033562	0.099285	0.99685	1476	3	0.38776
FBgn0034722	6	0.39975	0.56346	0.988564	8559	1	0.27071	0.033632	0.10128	0.99685	1477	3	0.27071
FBgn0030290	6	0.87515	0.8755	0.989455	13736	1	0.36463	0.033716	0.10146	0.99685	1478	4	0.36463
FBgn0035023	10	0.037713	0.13354	0.967275	1682	5	-0.01748	0.033736	0.1231	0.998848	1479	4	-0.01748
FBgn0034323	6	0.51832	0.66168	0.988564	9872	1	0.47367	0.033824	0.10173	0.99685	1480	4	0.47367
FBgn0267021	4	0.2231	0.34554	0.979758	6022	1	-0.11725	0.033908	0.085446	0.99685	1481	1	-0.11725
FBgn0014368	6	0.34322	0.51829	0.988564	7954	2	-0.10359	0.033918	0.10197	0.99685	1482	2	-0.10359
FBgn0030983	6	0.18239	0.34855	0.979758	5251	2	0.21422	0.033962	0.10206	0.99685	1483	3	0.21422
FBgn0085265	6	0.56464	0.70191	0.988564	10557	2	0.27383	0.033988	0.10212	0.99685	1484	3	0.27383
FBgn0037305	4	0.75019	0.74998	0.989455	12220	1	0.55316	0.033993	0.085618	0.99685	1485	3	0.55316
FBgn0265892	4	0.0043429	0.0151	0.926111	280	2	0.19788	0.034001	0.085639	0.99685	1486	2	0.19788
FBgn0027836	7	0.16102	0.33903	0.979758	4821	1	0.48845	0.034014	0.11274	0.997395	1487	5	0.48845
FBgn0053483	6	0.83174	0.84007	0.989455	13137	1	0.49701	0.034049	0.10227	0.99685	1488	4	0.49701
FBgn0053703	6	0.56464	0.70191	0.988564	10329	2	0.44949	0.034049	0.10227	0.99685	1489	4	0.44949
FBgn0053922	6	0.10133	0.2325	0.979758	3485	1	0.59668	0.034049	0.10227	0.99685	1490	4	0.59668
FBgn0030313	6	0.51636	0.66001	0.988564	9843	2	0.016789	0.034057	0.10229	0.99685	1491	2	0.016789
FBgn0267818	4	0.75019	0.74998	0.989455	12176	1	0.3761	0.034089	0.085846	0.99685	1492	2	0.3761
FBgn0019890	7	0.22215	0.41264	0.979758	6007	2	0.35393	0.034123	0.11307	0.997395	1493	5	0.35393
FBgn0036176	6	0.92921	0.92905	0.998342	14510	0	0.079235	0.034234	0.10273	0.99685	1494	3	0.079235
FBgn0024941	6	0.89707	0.89686	0.998342	14032	0	0.34648	0.034258	0.10279	0.99685	1495	4	0.34648
FBgn0030089	8	0.10818	0.26573	0.979758	3651	2	0.32503	0.034266	0.11475	0.997395	1496	4	0.32503
FBgn0034909	6	0.92037	0.92005	0.998342	14393	0	0.33311	0.034334	0.10297	0.99685	1497	4	0.33311
FBgn0041164	6	0.31681	0.49745	0.988564	7525	1	0.1182	0.034337	0.10298	0.99685	1498	2	0.1182
FBgn0000535	3	0.16316	0.26018	0.979758	4870	2	-0.40924	0.034363	0.083473	0.99685	1499	1	-0.40924
FBgn0033590	6	0.18128	0.34697	0.979758	5233	3	-0.41833	0.034403	0.10316	0.99685	1500	2	-0.41833
FBgn0027794	6	0.14128	0.29058	0.979758	4390	2	0.27805	0.034433	0.10323	0.99685	1501	3	0.27805
FBgn0034523	5	0.71919	0.74322	0.989455	11888	1	0.2372	0.034452	0.10155	0.99685	1502	3	0.2372
FBgn0028897	6	0.12415	0.26607	0.979758	4024	2	0.4587	0.034467	0.1033	0.99685	1503	4	0.4587
FBgn0033875	6	0.52905	0.67088	0.988564	10002	2	0.49279	0.034467	0.1033	0.99685	1504	4	0.49279
FBgn0031081	6	0.24289	0.43067	0.979758	6442	3	-0.16088	0.034472	0.10331	0.99685	1505	2	-0.16088
FBgn0266248	4	0.34505	0.48385	0.988564	7974	1	0.19811	0.034511	0.086704	0.99685	1506	1	0.19811
FBgn0003374	6	0.15789	0.31414	0.979758	4763	2	0.063225	0.034542	0.10348	0.99685	1507	2	0.063225
FBgn0030589	6	0.9941	0.9941	0.999085	15545	0	0.5807	0.034581	0.10357	0.99685	1508	4	0.5807
FBgn0037254	6	0.93986	0.93977	0.998342	14680	0	0.50551	0.034611	0.10364	0.99685	1509	4	0.50551
FBgn0264349	4	0.86224	0.86191	0.989455	13507	0	0.68166	0.034633	0.086933	0.99685	1510	3	0.68166
FBgn0030608	6	0.11929	0.25908	0.979758	3907	1	0.41163	0.034688	0.10382	0.99685	1511	4	0.41163
FBgn0034428	6	0.41558	0.57625	0.988564	8710	2	0.084422	0.034749	0.10396	0.99685	1512	3	0.084422
FBgn0042101	6	0.99554	0.99558	0.999085	15569	0	0.37153	0.034753	0.10397	0.99685	1513	4	0.37153
FBgn0053467	6	0.12268	0.26393	0.979758	3992	2	0.2597	0.034753	0.10397	0.99685	1514	3	0.2597
FBgn0259979	6	0.16131	0.31898	0.979758	4833	3	-0.14743	0.034819	0.10411	0.99685	1515	2	-0.14743
FBgn0032639	6	0.96592	0.966	0.998342	15117	0	0.33384	0.03482	0.10412	0.99685	1516	3	0.33384
FBgn0050484	5	0.39921	0.54467	0.988564	8556	1	0.2056	0.034821	0.10249	0.99685	1517	2	0.2056
FBgn0024984	6	0.85463	0.85759	0.989455	13437	1	0.35451	0.034829	0.10414	0.99685	1518	4	0.35451
FBgn0063492	6	0.89914	0.89895	0.998342	14063	0	0.44484	0.034878	0.10427	0.99685	1519	4	0.44484
FBgn0259749	6	0.81221	0.82646	0.989455	12908	1	0.35691	0.034878	0.10427	0.99685	1520	3	0.35691
FBgn0085459	6	0.78488	0.80913	0.989455	12576	1	0.03815	0.034957	0.10446	0.99685	1521	1	0.03815
FBgn0031871	5	0.16845	0.32526	0.979758	4970	1	0.79098	0.034973	0.10289	0.99685	1522	3	0.79098
FBgn0031881	5	0.30377	0.45296	0.986685	7363	1	0.65328	0.034973	0.10289	0.99685	1523	3	0.65328
FBgn0039425	6	0.012238	0.04581	0.950637	689	3	-0.60374	0.035061	0.1047	0.99685	1524	1	-0.60374
FBgn0038148	6	0.40008	0.56371	0.988564	8561	2	0.10901	0.035061	0.1047	0.99685	1525	2	0.10901
FBgn0051955	4	0.92375	0.92344	0.998342	14442	0	0.41752	0.035086	0.087853	0.99685	1526	2	0.41752
FBgn0029660	4	0.65893	0.6723	0.988564	11370	1	0.47966	0.035101	0.087877	0.99685	1527	3	0.47966
FBgn0267339	5	0.6263	0.68916	0.988564	11072	1	0.54325	0.035111	0.10324	0.99685	1528	4	0.54325
FBgn0031077	2	0.94633	0.94611	0.998342	14773	0	0.83847	0.035139	0.063655	0.992403	1529	2	0.83847
FBgn0036667	4	0.79207	0.79153	0.989455	12670	0	0.53096	0.035144	0.087985	0.99685	1530	3	0.53096
FBgn0264870	4	0.75019	0.74998	0.989455	12177	1	0.32619	0.035159	0.088022	0.99685	1531	2	0.32619
FBgn0053475	6	0.98451	0.98456	0.999085	15383	0	0.42007	0.035161	0.10492	0.99685	1532	4	0.42007
FBgn0037464	6	0.80081	0.81906	0.989455	12776	1	0.41569	0.035161	0.10492	0.99685	1533	4	0.41569
FBgn0028700	4	0.95086	0.95069	0.998342	14861	0	0.39915	0.035179	0.088055	0.99685	1534	3	0.39915
FBgn0030054	6	0.082016	0.20352	0.979758	3060	2	0.30299	0.035269	0.10518	0.99685	1535	3	0.30299
FBgn0036135	6	0.77809	0.80519	0.989455	12506	1	0.24603	0.03529	0.10523	0.99685	1536	3	0.24603
FBgn0000206	6	0.35741	0.5295	0.988564	8105	2	0.2462	0.035394	0.10547	0.99685	1537	3	0.2462
FBgn0037761	6	0.24744	0.43668	0.983925	6600	1	0.34996	0.03541	0.10551	0.99685	1538	3	0.34996
FBgn0027329	4	0.93541	0.9351	0.998342	14613	0	0.51425	0.035418	0.088604	0.99685	1539	2	0.51425
FBgn0263505	4	0.48112	0.55818	0.988564	9439	1	0.32835	0.035436	0.088644	0.99685	1540	2	0.32835
FBgn0051659	6	0.84091	0.84692	0.989455	13254	1	0.48187	0.035473	0.10567	0.99685	1541	4	0.48187
FBgn0265906	4	0.12268	0.23035	0.979758	3991	1	0.093567	0.035483	0.088739	0.99685	1542	1	0.093567
FBgn0266667	6	0.73356	0.78138	0.989455	12012	1	0.54	0.035508	0.10576	0.99685	1543	4	0.54
FBgn0086673	6	0.56464	0.70191	0.988564	10458	2	0.041989	0.035545	0.10584	0.99685	1544	1	0.041989
FBgn0039441	6	0.30215	0.48616	0.988564	7334	2	-0.17776	0.035545	0.10584	0.99685	1545	2	-0.17776
FBgn0260747	6	0.088432	0.21323	0.979758	3211	3	-0.84208	0.035545	0.10584	0.99685	1546	2	-0.84208
FBgn0031281	6	0.27391	0.46445	0.986685	6946	2	0.089521	0.035545	0.10584	0.99685	1547	2	0.089521
FBgn0085471	5	0.43201	0.57679	0.988564	8867	1	0.16372	0.035584	0.10448	0.99685	1548	2	0.16372
FBgn0014340	6	0.2098	0.38607	0.979758	5791	2	0.26859	0.035594	0.10596	0.99685	1549	4	0.26859
FBgn0261396	4	0.067872	0.15354	0.967275	2674	1	0.43128	0.035604	0.088979	0.99685	1550	2	0.43128
FBgn0033760	5	0.16386	0.31901	0.979758	4880	2	0.48641	0.035614	0.10457	0.99685	1551	3	0.48641
FBgn0040206	4	0.010041	0.03213	0.943341	596	1	0.38554	0.035651	0.08908	0.99685	1552	3	0.38554
FBgn0013733	10	0.28917	0.53636	0.988564	7158	3	0.027456	0.035653	0.1286	0.998848	1553	4	0.027456
FBgn0017558	6	0.5195	0.66267	0.988564	9887	2	0.23148	0.035673	0.10616	0.99685	1554	3	0.23148
FBgn0033421	6	0.71356	0.77175	0.989455	11831	1	0.35026	0.035717	0.10628	0.99685	1555	4	0.35026
FBgn0004387	6	0.40528	0.56798	0.988564	8606	2	0.43144	0.03573	0.10631	0.99685	1556	4	0.43144
FBgn0040697	6	0.092537	0.21935	0.979758	3285	3	0.031423	0.035749	0.10636	0.99685	1557	3	0.031423
FBgn0033479	4	0.14834	0.25988	0.979758	4542	1	0.3498	0.035751	0.089287	0.99685	1558	2	0.3498
FBgn0024314	4	0.98942	0.98944	0.999085	15465	0	0.83198	0.035781	0.089346	0.99685	1559	3	0.83198
FBgn0034861	10	0.017412	0.071704	0.950637	893	3	-0.019706	0.035783	0.12896	0.998848	1560	3	-0.019706
FBgn0033597	6	0.79417	0.81477	0.989455	12696	1	0.09435	0.035788	0.10643	0.99685	1561	2	0.09435
FBgn0266615	6	0.096989	0.22609	0.979758	3394	3	0.21791	0.035801	0.10647	0.99685	1562	3	0.21791
FBgn0031607	6	0.047791	0.13331	0.967275	1982	3	0.079562	0.035855	0.1066	0.99685	1563	3	0.079562
FBgn0267480	4	0.97692	0.97685	0.999085	15279	0	0.5505	0.035957	0.089734	0.99685	1564	2	0.5505
FBgn0267107	4	0.485	0.56031	0.988564	9491	1	0.36473	0.036057	0.089936	0.99685	1565	3	0.36473
FBgn0002632	6	0.090997	0.21708	0.979758	3261	3	-0.39775	0.036058	0.10707	0.99685	1566	2	-0.39775
FBgn0265733	4	0.94944	0.94927	0.998342	14825	0	0.5192	0.036075	0.08997	0.99685	1567	2	0.5192
FBgn0050394	6	0.56464	0.70191	0.988564	10347	2	0.62809	0.036083	0.10713	0.99685	1568	3	0.62809
FBgn0030817	7	0.14538	0.31976	0.979758	4480	3	-0.14912	0.036086	0.11871	0.998848	1569	3	-0.14912
FBgn0053002	6	0.27076	0.46201	0.986685	6906	2	0.14783	0.036111	0.10719	0.99685	1570	2	0.14783
FBgn0267706	4	0.02311	0.061277	0.950637	1130	2	-0.0087579	0.036199	0.090219	0.99685	1571	2	-0.0087579
FBgn0036482	6	0.63042	0.73697	0.989455	11109	1	0.42782	0.036206	0.10741	0.99685	1572	4	0.42782
FBgn0038565	6	0.90747	0.90714	0.998342	14204	0	0.44224	0.036226	0.10746	0.99685	1573	4	0.44224
FBgn0033090	6	0.49579	0.64262	0.988564	9598	2	0.4483	0.036226	0.10746	0.99685	1574	4	0.4483
FBgn0034407	6	0.93308	0.93289	0.998342	14575	0	0.53754	0.03627	0.10755	0.99685	1575	3	0.53754
FBgn0023214	6	0.1863	0.35387	0.979758	5318	2	-0.15319	0.036272	0.10755	0.99685	1576	1	-0.15319
FBgn0262816	6	0.16913	0.32988	0.979758	4986	2	-0.23315	0.036272	0.10755	0.99685	1577	1	-0.23315
FBgn0032268	6	0.15346	0.30785	0.979758	4646	2	-0.069582	0.036272	0.10755	0.99685	1578	3	-0.069582
FBgn0261610	6	0.24556	0.43417	0.982302	6570	2	-0.14594	0.036272	0.10755	0.99685	1579	2	-0.14594
FBgn0267575	4	0.20076	0.32	0.979758	5594	2	-0.32416	0.036315	0.090478	0.99685	1580	1	-0.32416
FBgn0034599	6	0.9117	0.91142	0.998342	14256	0	0.31977	0.036329	0.10769	0.99685	1581	4	0.31977
FBgn0029518	6	0.83223	0.84042	0.989455	13144	1	0.24489	0.036346	0.10772	0.99685	1582	3	0.24489
FBgn0034718	10	0.51921	0.7314	0.989455	9883	2	0.25653	0.036355	0.13059	0.998848	1583	6	0.25653
FBgn0039639	4	0.96366	0.96345	0.998342	15071	0	0.4672	0.03637	0.090588	0.99685	1584	3	0.4672
FBgn0267606	4	0.75019	0.74998	0.989455	12155	1	0.62255	0.036421	0.090689	0.99685	1585	2	0.62255
FBgn0039149	4	0.66702	0.67845	0.988564	11425	1	0.6268	0.036421	0.090689	0.99685	1586	2	0.6268
FBgn0036242	6	0.16105	0.31862	0.979758	4822	2	0.31707	0.036487	0.10807	0.99685	1587	4	0.31707
FBgn0003065	6	0.87515	0.8755	0.989455	13760	1	0.39736	0.036554	0.10821	0.99685	1588	4	0.39736
FBgn0026257	4	0.41174	0.52156	0.988564	8674	1	0.50205	0.036564	0.090988	0.99685	1589	3	0.50205
FBgn0034221	5	0.16673	0.32354	0.979758	4937	1	0.40086	0.03659	0.10706	0.99685	1590	3	0.40086
FBgn0051845	4	0.11175	0.218	0.979758	3718	1	-0.062664	0.036593	0.091058	0.99685	1591	1	-0.062664
FBgn0267220	4	0.84539	0.84485	0.989455	13305	0	0.42314	0.036639	0.091151	0.99685	1592	3	0.42314
FBgn0085638	6	0.70084	0.76598	0.989455	11711	1	0.1748	0.036647	0.10844	0.99685	1593	3	0.1748
FBgn0028667	6	0.44455	0.59993	0.988564	9006	2	0.35989	0.036656	0.10845	0.99685	1594	4	0.35989
FBgn0039686	6	0.017169	0.058637	0.950637	880	2	0.031128	0.036657	0.10846	0.99685	1595	2	0.031128
FBgn0037068	5	0.45382	0.59832	0.988564	9111	1	0.3226	0.036691	0.10734	0.99685	1596	4	0.3226
FBgn0036728	6	0.39162	0.55692	0.988564	8479	2	0.15001	0.036756	0.1087	0.99685	1597	3	0.15001
FBgn0038973	6	0.87515	0.8755	0.989455	13589	1	0.39203	0.036894	0.10902	0.99685	1598	4	0.39203
FBgn0037719	6	0.80342	0.82067	0.989455	12804	1	0.43714	0.036931	0.10911	0.99685	1599	4	0.43714
FBgn0266157	4	0.33603	0.47363	0.986685	7798	2	-0.3086	0.036939	0.091736	0.99685	1600	2	-0.3086
FBgn0000384	6	0.82594	0.83585	0.989455	13073	1	0.70388	0.037011	0.10929	0.99685	1601	4	0.70388
FBgn0036342	6	0.77926	0.80585	0.989455	12519	1	0.058	0.037032	0.10934	0.99685	1602	2	0.058
FBgn0032840	6	0.97326	0.97332	0.998526	15228	0	0.3338	0.03722	0.10976	0.99685	1603	4	0.3338
FBgn0052686	6	0.64715	0.74337	0.989455	11270	1	0.4359	0.037285	0.10991	0.99685	1604	4	0.4359
FBgn0053107	4	0.35667	0.49471	0.988564	8095	1	0.26451	0.037292	0.09247	0.99685	1605	2	0.26451
FBgn0033635	6	0.97651	0.97657	0.999085	15272	0	0.53995	0.037298	0.10994	0.99685	1606	4	0.53995
FBgn0263929	7	0.65563	0.77962	0.989455	11346	2	0.22687	0.037305	0.12183	0.998848	1607	3	0.22687
FBgn0267661	4	0.75019	0.74998	0.989455	12204	1	0.15976	0.037307	0.092518	0.99685	1608	2	0.15976
FBgn0031283	5	0.50591	0.63356	0.988564	9722	1	0.6447	0.037394	0.10911	0.99685	1609	3	0.6447
FBgn0032857	6	0.90168	0.90144	0.998342	14113	0	0.36274	0.037469	0.11033	0.99685	1610	4	0.36274
FBgn0011659	6	0.52315	0.66578	0.988564	9935	1	0.35133	0.037469	0.11033	0.99685	1611	4	0.35133
FBgn0037589	6	0.83935	0.84578	0.989455	13228	1	0.39133	0.037469	0.11033	0.99685	1612	4	0.39133
FBgn0263446	4	0.59741	0.62852	0.988564	10840	1	0.56207	0.037472	0.092864	0.99685	1613	3	0.56207
FBgn0039728	6	0.57424	0.71037	0.989455	10658	1	0.19124	0.037475	0.11035	0.99685	1614	3	0.19124
FBgn0011701	6	0.7539	0.79179	0.989455	12277	1	0.47971	0.037475	0.11035	0.99685	1615	3	0.47971
FBgn0034292	6	0.76044	0.7953	0.989455	12352	1	0.48864	0.037475	0.11035	0.99685	1616	3	0.48864
FBgn0039650	6	0.96054	0.96057	0.998342	15024	0	0.51761	0.037475	0.11035	0.99685	1617	3	0.51761
FBgn0030536	6	0.029696	0.090356	0.952497	1392	2	-0.022035	0.037475	0.11035	0.99685	1618	2	-0.022035
FBgn0265084	6	0.35741	0.5295	0.988564	8106	2	-0.071714	0.037475	0.11035	0.99685	1619	2	-0.071714
FBgn0051858	6	0.14673	0.29833	0.979758	4517	1	0.054182	0.037475	0.11035	0.99685	1620	2	0.054182
FBgn0035453	6	0.95995	0.95998	0.998342	15015	0	0.35886	0.037475	0.11035	0.99685	1621	3	0.35886
FBgn0039718	6	0.13102	0.27599	0.979758	4174	1	0.22123	0.037475	0.11035	0.99685	1622	3	0.22123
FBgn0026373	6	0.24289	0.43067	0.979758	6478	3	-0.16385	0.037475	0.11035	0.99685	1623	2	-0.16385
FBgn0053757	6	0.1458	0.29703	0.979758	4496	3	-0.31808	0.037475	0.11035	0.99685	1624	2	-0.31808
FBgn0002466	1	0.9625	0.96281	0.998342	15056	0	1.9529	0.037504	0.037455	0.992403	1625	1	1.9529
FBgn0033701	6	0.096103	0.22477	0.979758	3376	2	0.323	0.037516	0.11044	0.99685	1626	4	0.323
FBgn0266958	4	0.011374	0.035113	0.943341	657	2	-0.21889	0.037609	0.093135	0.99685	1627	2	-0.21889
FBgn0050441	5	0.84357	0.84394	0.989455	13289	0	0.67502	0.037648	0.10978	0.99685	1628	4	0.67502
FBgn0033869	6	0.14268	0.29256	0.979758	4422	2	0.52309	0.037709	0.11091	0.99685	1629	3	0.52309
FBgn0032313	6	0.18798	0.3562	0.979758	5354	1	0.40409	0.037709	0.11091	0.99685	1630	3	0.40409
FBgn0035439	6	0.84225	0.84791	0.989455	13275	1	0.37379	0.037709	0.11091	0.99685	1631	3	0.37379
FBgn0032934	6	0.8506	0.85438	0.989455	13382	1	0.40993	0.037709	0.11091	0.99685	1632	3	0.40993
FBgn0050412	6	0.56464	0.70191	0.988564	10384	2	0.21505	0.037709	0.11091	0.99685	1633	3	0.21505
FBgn0037826	6	0.53267	0.67398	0.988564	10044	1	0.39794	0.03795	0.11151	0.99685	1634	4	0.39794
FBgn0040786	6	0.95172	0.95161	0.998342	14872	0	0.54926	0.03795	0.11151	0.99685	1635	4	0.54926
FBgn0040508	6	0.98216	0.98218	0.999085	15359	0	0.60443	0.03795	0.11151	0.99685	1636	4	0.60443
FBgn0036607	6	0.10622	0.23973	0.979758	3603	2	0.14797	0.037999	0.11161	0.99685	1637	2	0.14797
FBgn0031044	6	0.32628	0.50496	0.988564	7656	2	0.25557	0.038069	0.11178	0.99685	1638	3	0.25557
FBgn0000588	6	0.24237	0.42993	0.979758	6307	2	0.068684	0.038137	0.11194	0.99685	1639	2	0.068684
FBgn0034232	5	0.4158	0.5608	0.988564	8714	2	0.29468	0.038146	0.11094	0.99685	1640	3	0.29468
FBgn0052656	6	0.00053472	0.0028413	0.724579	43	1	0.38735	0.038165	0.112	0.99685	1641	4	0.38735
FBgn0004110	6	0.094382	0.22211	0.979758	3332	3	-0.04802	0.038183	0.11204	0.99685	1642	3	-0.04802
FBgn0250785	4	0.35965	0.49611	0.988564	8128	1	0.32576	0.038196	0.094369	0.99685	1643	3	0.32576
FBgn0260871	6	0.92822	0.92803	0.998342	14499	0	0.25155	0.038241	0.11216	0.99685	1644	3	0.25155
FBgn0265191	4	0.98853	0.98854	0.999085	15447	0	0.37913	0.038272	0.094528	0.99685	1645	3	0.37913
FBgn0263353	6	0.50744	0.65242	0.988564	9741	2	0.63051	0.038329	0.11236	0.99685	1646	4	0.63051
FBgn0031976	6	0.95197	0.95187	0.998342	14880	0	0.32552	0.038329	0.11236	0.99685	1647	4	0.32552
FBgn0032601	6	0.22722	0.40955	0.979758	6082	1	0.46907	0.038329	0.11236	0.99685	1648	4	0.46907
FBgn0030258	6	0.48204	0.63099	0.988564	9455	1	0.52979	0.038329	0.11236	0.99685	1649	4	0.52979
FBgn0034266	1	0.96166	0.962	0.998342	15040	0	0.89801	0.038336	0.038254	0.992403	1650	1	0.89801
FBgn0036152	6	0.89427	0.89411	0.998342	13988	0	0.18596	0.038344	0.1124	0.99685	1651	3	0.18596
FBgn0004389	6	0.98886	0.98888	0.999085	15455	0	0.31693	0.03841	0.11255	0.99705	1652	3	0.31693
FBgn0031971	5	0.45739	0.6019	0.988564	9159	2	0.46268	0.038495	0.11156	0.99685	1653	3	0.46268
FBgn0266065	4	0.86116	0.86082	0.989455	13498	0	0.29765	0.038533	0.095077	0.99685	1654	3	0.29765
FBgn0259716	6	0.96971	0.96983	0.998471	15171	0	0.36963	0.038533	0.11282	0.997395	1655	4	0.36963
FBgn0036059	4	0.30067	0.43356	0.982138	7309	2	-0.25234	0.038579	0.095178	0.99685	1656	1	-0.25234
FBgn0265097	4	0.82004	0.81953	0.989455	13003	0	0.62512	0.038583	0.095188	0.99685	1657	3	0.62512
FBgn0036565	6	0.3105	0.49264	0.988564	7456	2	0.0026661	0.03862	0.11304	0.997395	1658	1	0.0026661
FBgn0042112	6	0.87515	0.8755	0.989455	13832	1	0.49837	0.038651	0.1131	0.997395	1659	4	0.49837
FBgn0032398	4	0.81657	0.81604	0.989455	12957	0	0.23757	0.038672	0.095383	0.99685	1660	2	0.23757
FBgn0027524	4	0.77518	0.77452	0.989455	12461	0	0.32254	0.038708	0.095453	0.99685	1661	2	0.32254
FBgn0064117	2	0.96128	0.96125	0.998342	15034	0	0.73662	0.038719	0.069931	0.992403	1662	2	0.73662
FBgn0039710	6	0.56464	0.70191	0.988564	10510	2	0.42963	0.038724	0.11329	0.997395	1663	4	0.42963
FBgn0265351	6	0.62724	0.73573	0.989455	11077	1	0.36277	0.038724	0.11329	0.997395	1664	3	0.36277
FBgn0265586	4	0.53296	0.58778	0.988564	10046	1	0.49373	0.038821	0.095674	0.99685	1665	3	0.49373
FBgn0004567	6	0.37677	0.54494	0.988564	8294	1	0.44933	0.03891	0.11374	0.997395	1666	4	0.44933
FBgn0031284	1	0.96103	0.96136	0.998342	15030	0	1.2601	0.038972	0.038916	0.992403	1667	1	1.2601
FBgn0266747	4	0.62982	0.65092	0.988564	11100	1	0.27795	0.038988	0.096027	0.99685	1668	2	0.27795
FBgn0037937	6	0.38233	0.54935	0.988564	8352	2	0.62376	0.038995	0.11394	0.997395	1669	4	0.62376
FBgn0034970	4	0.91225	0.912	0.998342	14273	0	0.39991	0.039017	0.096091	0.99685	1670	3	0.39991
FBgn0050085	6	0.64357	0.74198	0.989455	11222	1	0.15507	0.039025	0.11401	0.997395	1671	3	0.15507
FBgn0032812	3	0.48503	0.50901	0.988564	9493	1	0.77283	0.039065	0.090245	0.99685	1672	2	0.77283
FBgn0039059	6	0.43997	0.5963	0.988564	8956	2	0.5445	0.03907	0.11412	0.997395	1673	4	0.5445
FBgn0000140	6	0.13665	0.28409	0.979758	4296	1	0.33608	0.039106	0.1142	0.997395	1674	4	0.33608
FBgn0262968	4	0.14183	0.2525	0.979758	4404	2	-0.080774	0.039156	0.096369	0.99685	1675	2	-0.080774
FBgn0008636	6	0.24623	0.43503	0.982972	6588	2	0.38008	0.039177	0.11435	0.997395	1676	4	0.38008
FBgn0261955	6	0.31753	0.49803	0.988564	7533	2	-0.10081	0.03922	0.11445	0.997395	1677	3	-0.10081
FBgn0050389	6	0.24289	0.43067	0.979758	6455	3	0.0081976	0.039233	0.11448	0.997395	1678	3	0.0081976
FBgn0038659	6	0.28229	0.47094	0.986685	7067	1	0.66385	0.039233	0.11448	0.997395	1679	3	0.66385
FBgn0266281	4	0.17843	0.29446	0.979758	5171	2	0.2111	0.039274	0.096603	0.99685	1680	2	0.2111
FBgn0037248	6	0.96861	0.96872	0.998471	15155	0	0.33182	0.039282	0.11459	0.997395	1681	3	0.33182
FBgn0038551	6	0.87515	0.8755	0.989455	13626	1	0.44906	0.03929	0.11461	0.997395	1682	4	0.44906
FBgn0052006	6	0.23524	0.42038	0.979758	6203	2	0.10173	0.039379	0.11482	0.997395	1683	3	0.10173
FBgn0002622	6	0.42782	0.58633	0.988564	8817	2	-0.12842	0.039379	0.11482	0.997395	1684	1	-0.12842
FBgn0039628	6	0.56464	0.70191	0.988564	10364	2	-0.02216	0.039379	0.11482	0.997395	1685	2	-0.02216
FBgn0031307	6	0.76563	0.79819	0.989455	12383	1	0.34166	0.039379	0.11482	0.997395	1686	3	0.34166
FBgn0052087	6	0.14565	0.29681	0.979758	4491	3	-0.3283	0.039379	0.11482	0.997395	1687	1	-0.3283
FBgn0265832	4	0.86645	0.86603	0.989455	13529	0	0.6352	0.039383	0.096809	0.99685	1688	3	0.6352
FBgn0265935	9	0.69621	0.82493	0.989455	11669	1	0.27418	0.039384	0.13635	0.998848	1689	5	0.27418
FBgn0002645	6	0.74344	0.78636	0.989455	12068	1	0.38862	0.039402	0.11488	0.997395	1690	3	0.38862
FBgn0033973	6	0.95553	0.95549	0.998342	14947	0	0.38408	0.039519	0.11516	0.998014	1691	4	0.38408
FBgn0026181	4	0.8062	0.80564	0.989455	12838	0	0.064506	0.039548	0.09717	0.99685	1692	1	0.064506
FBgn0265268	6	0.64998	0.7445	0.989455	11292	1	0.38481	0.039598	0.11534	0.998014	1693	3	0.38481
FBgn0032230	6	0.22698	0.40923	0.979758	6077	2	0.30724	0.039612	0.11538	0.998014	1694	2	0.30724
FBgn0001313	6	0.67925	0.75659	0.989455	11531	1	0.20152	0.039612	0.11538	0.998014	1695	3	0.20152
FBgn0036698	6	0.36041	0.53188	0.988564	8141	2	0.15986	0.039612	0.11538	0.998014	1696	2	0.15986
FBgn0038037	2	0.96038	0.96034	0.998342	15021	0	0.97112	0.039625	0.071521	0.992403	1697	2	0.97112
FBgn0027363	2	0.96038	0.96034	0.998342	15022	0	0.8543	0.039625	0.071521	0.992403	1698	2	0.8543
FBgn0029843	8	0.097931	0.24802	0.979758	3420	3	0.63771	0.039695	0.12882	0.998848	1699	5	0.63771
FBgn0267774	4	0.032402	0.081277	0.950637	1482	1	0.43742	0.039733	0.09756	0.99685	1700	3	0.43742
FBgn0265982	4	0.18774	0.30512	0.979758	5350	1	-0.034019	0.039825	0.097741	0.99685	1701	1	-0.034019
FBgn0085486	6	0.56464	0.70191	0.988564	10294	2	0.32214	0.039852	0.11592	0.998848	1702	3	0.32214
FBgn0261563	7	0.86417	0.87591	0.989797	13515	1	0.15997	0.03986	0.12734	0.998848	1703	2	0.15997
FBgn0038552	4	0.94866	0.94851	0.998342	14812	0	0.10517	0.03994	0.097986	0.99685	1704	1	0.10517
FBgn0036089	6	0.97895	0.97899	0.999085	15304	0	0.3152	0.039942	0.11612	0.998848	1705	4	0.3152
FBgn0267544	4	0.39309	0.51232	0.988564	8500	1	0.80842	0.039967	0.098054	0.99685	1706	3	0.80842
FBgn0053998	6	0.14565	0.29681	0.979758	4492	3	-0.19998	0.04	0.11625	0.998848	1707	2	-0.19998
FBgn0052406	6	0.92227	0.922	0.998342	14418	0	0.37522	0.040027	0.11632	0.998848	1708	4	0.37522
FBgn0010044	6	0.53953	0.67998	0.988564	10095	1	0.49219	0.040027	0.11632	0.998848	1709	4	0.49219
FBgn0029717	6	0.43222	0.58999	0.988564	8872	1	0.32052	0.040085	0.11643	0.998848	1710	4	0.32052
FBgn0266564	4	0.71542	0.7181	0.989455	11853	1	0.45784	0.040115	0.098377	0.99685	1711	3	0.45784
FBgn0250844	6	0.71161	0.77082	0.989455	11810	1	0.23723	0.040138	0.11654	0.998848	1712	3	0.23723
FBgn0024365	6	0.9764	0.97646	0.999085	15271	0	0.25759	0.040154	0.11659	0.998848	1713	4	0.25759
FBgn0033271	6	0.31187	0.49369	0.988564	7477	2	0.24239	0.040184	0.11666	0.998848	1714	3	0.24239
FBgn0033592	6	0.97001	0.97013	0.998471	15175	0	0.364	0.040243	0.11679	0.998848	1715	4	0.364
FBgn0032297	6	0.80113	0.81925	0.989455	12777	1	0.142	0.040275	0.11688	0.998848	1716	2	0.142
FBgn0038400	4	0.91944	0.91911	0.998342	14380	0	0.50268	0.040309	0.098773	0.99685	1717	2	0.50268
FBgn0265704	4	0.1045	0.20949	0.979758	3556	2	0.25755	0.040309	0.098773	0.99685	1718	2	0.25755
FBgn0030412	6	0.36705	0.53716	0.988564	8206	2	0.11535	0.040344	0.11703	0.998848	1719	2	0.11535
FBgn0266565	4	0.57739	0.61533	0.988564	10677	1	0.60083	0.04035	0.098852	0.99685	1720	3	0.60083
FBgn0259176	14	0.91963	0.96518	0.998342	14384	1	0.18254	0.040373	0.16003	0.998848	1721	8	0.18254
FBgn0024277	8	0.1905	0.39944	0.979758	5392	3	0.33001	0.040398	0.13057	0.998848	1722	4	0.33001
FBgn0038161	6	0.40477	0.56757	0.988564	8605	2	-0.44359	0.040413	0.11718	0.998848	1723	1	-0.44359
FBgn0038258	6	0.99214	0.99217	0.999085	15512	0	0.51418	0.04042	0.11719	0.998848	1724	4	0.51418
FBgn0037842	6	0.66417	0.7503	0.989455	11400	1	0.4013	0.040485	0.11735	0.998848	1725	3	0.4013
FBgn0037659	7	0.87678	0.88426	0.996109	13854	1	-0.24148	0.040504	0.12867	0.998848	1726	3	-0.24148
FBgn0052086	5	0.82339	0.8241	0.989455	13034	1	0.90439	0.040517	0.11528	0.998014	1727	3	0.90439
FBgn0051760	6	0.10076	0.23167	0.979758	3471	2	-0.025082	0.040552	0.11752	0.998848	1728	2	-0.025082
FBgn0037981	4	0.62095	0.6446	0.988564	11033	1	0.3629	0.040562	0.099267	0.99685	1729	2	0.3629
FBgn0265725	6	0.61968	0.73288	0.989455	11020	1	-0.15544	0.04062	0.11768	0.998848	1730	2	-0.15544
FBgn0023523	6	0.31987	0.49984	0.988564	7572	1	0.32422	0.040641	0.11772	0.998848	1731	4	0.32422
FBgn0265643	4	0.20296	0.32252	0.979758	5637	1	0.35778	0.040665	0.09948	0.99685	1732	2	0.35778
FBgn0052683	6	0.31603	0.49684	0.988564	7517	1	0.35156	0.040689	0.11783	0.998848	1733	4	0.35156
FBgn0038201	6	0.30202	0.48606	0.988564	7330	2	0.28262	0.040711	0.11789	0.998848	1734	4	0.28262
FBgn0033954	6	0.14888	0.30139	0.979758	4553	1	0.38608	0.040716	0.1179	0.998848	1735	3	0.38608
FBgn0265763	4	0.71542	0.7181	0.989455	11852	1	0.43453	0.040747	0.099641	0.99685	1736	2	0.43453
FBgn0011559	6	0.75528	0.79255	0.989455	12293	1	0.44915	0.040824	0.11816	0.998848	1737	4	0.44915
FBgn0002922	6	0.44082	0.59696	0.988564	8966	1	0.53205	0.040874	0.1183	0.998848	1738	3	0.53205
FBgn0032408	6	0.9922	0.99224	0.999085	15515	0	0.24628	0.040886	0.11832	0.998848	1739	2	0.24628
FBgn0054051	6	0.32739	0.50585	0.988564	7673	1	0.3504	0.040895	0.11835	0.998848	1740	3	0.3504
FBgn0010470	9	0.69213	0.82266	0.989455	11627	2	0.29956	0.0409	0.13995	0.998848	1741	4	0.29956
FBgn0033523	1	0.95901	0.95935	0.998342	15001	0	0.73277	0.040986	0.040907	0.992403	1742	1	0.73277
FBgn0053500	6	0.19689	0.36849	0.979758	5525	3	-0.096559	0.040999	0.11859	0.998848	1743	2	-0.096559
FBgn0266824	4	0.97534	0.97521	0.999085	15255	0	0.68261	0.041031	0.10023	0.99685	1744	3	0.68261
FBgn0037282	6	0.87515	0.8755	0.989455	13811	1	0.38149	0.041033	0.11866	0.998848	1745	3	0.38149
FBgn0028468	5	0.77264	0.78091	0.989455	12439	1	-0.21176	0.041056	0.11623	0.998848	1746	2	-0.21176
FBgn0025352	6	0.73933	0.78423	0.989455	12043	1	0.24773	0.041138	0.11891	0.998848	1747	3	0.24773
FBgn0035263	6	0.64759	0.74355	0.989455	11276	1	-0.032388	0.041171	0.119	0.998848	1748	2	-0.032388
FBgn0051546	6	0.68565	0.75934	0.989455	11577	1	0.48124	0.04124	0.11917	0.998848	1749	4	0.48124
FBgn0033538	6	0.79105	0.81279	0.989455	12655	1	0.17286	0.041277	0.11926	0.998848	1750	3	0.17286
FBgn0039065	3	0.53064	0.54472	0.988564	10023	1	-0.15117	0.041313	0.093541	0.99685	1751	1	-0.15117
FBgn0266197	4	0.0052666	0.018201	0.926279	329	2	-0.13814	0.041322	0.10083	0.99685	1752	1	-0.13814
FBgn0278604	4	0.579	0.61636	0.988564	10694	1	0.5203	0.041347	0.10089	0.99685	1753	2	0.5203
FBgn0027287	8	0.24282	0.45739	0.986685	6312	3	0.029074	0.041353	0.13308	0.998848	1754	1	0.029074
FBgn0013759	8	0.43049	0.64481	0.988564	8840	3	-0.12684	0.041353	0.13308	0.998848	1755	2	-0.12684
FBgn0011666	10	0.06247	0.19493	0.979758	2424	3	0.027765	0.041366	0.14475	0.998848	1756	5	0.027765
FBgn0262821	6	0.60694	0.72823	0.989455	10911	1	0.51075	0.041448	0.11965	0.998848	1757	3	0.51075
FBgn0038630	6	0.92921	0.92905	0.998342	14516	0	0.34739	0.041481	0.11973	0.998848	1758	3	0.34739
FBgn0026058	6	0.52404	0.6665	0.988564	9942	2	0.13019	0.041481	0.11973	0.998848	1759	2	0.13019
FBgn0250836	6	0.78218	0.80758	0.989455	12556	1	0.58887	0.041521	0.11981	0.998848	1760	4	0.58887
FBgn0011289	4	0.92375	0.92344	0.998342	14437	0	0.39276	0.041523	0.10124	0.99685	1761	3	0.39276
FBgn0083979	6	0.088119	0.21277	0.979758	3204	3	-0.11653	0.041662	0.12015	0.998848	1762	3	-0.11653
FBgn0039380	6	0.94966	0.94954	0.998342	14835	0	0.71915	0.041675	0.12018	0.998848	1763	4	0.71915
FBgn0085427	6	0.93816	0.9381	0.998342	14657	0	0.33907	0.041675	0.12018	0.998848	1764	4	0.33907
FBgn0041102	6	0.56464	0.70191	0.988564	10522	2	0.63227	0.041675	0.12018	0.998848	1765	4	0.63227
FBgn0085214	6	0.8398	0.84609	0.989455	13239	1	0.67904	0.041675	0.12018	0.998848	1766	4	0.67904
FBgn0032511	6	0.073818	0.19111	0.979758	2815	1	0.58232	0.041675	0.12018	0.998848	1767	4	0.58232
FBgn0001269	6	0.94776	0.94759	0.998342	14798	0	0.36288	0.041675	0.12018	0.998848	1768	4	0.36288
FBgn0029813	6	0.87515	0.8755	0.989455	13633	1	0.23504	0.041677	0.12018	0.998848	1769	3	0.23504
FBgn0266645	4	0.47936	0.55725	0.988564	9421	1	0.23489	0.041683	0.10155	0.99685	1770	2	0.23489
FBgn0035076	2	0.9583	0.95823	0.998342	14991	0	0.56249	0.041703	0.075083	0.99685	1771	2	0.56249
FBgn0011743	4	0.95728	0.95709	0.998342	14977	0	0.74531	0.041752	0.1017	0.99685	1772	3	0.74531
FBgn0037330	4	0.33283	0.47006	0.986685	7718	1	0.31135	0.041803	0.10181	0.99685	1773	2	0.31135
FBgn0036094	6	0.98632	0.98634	0.999085	15412	0	0.32222	0.041822	0.12052	0.998848	1774	3	0.32222
FBgn0037591	6	0.82353	0.83416	0.989455	13053	1	0.21209	0.041822	0.12052	0.998848	1775	2	0.21209
FBgn0037645	6	0.56464	0.70191	0.988564	10491	2	0.08953	0.041859	0.12061	0.998848	1776	3	0.08953
FBgn0035831	4	0.94204	0.94181	0.998342	14714	0	0.51105	0.041897	0.102	0.99685	1777	3	0.51105
FBgn0029990	6	0.94085	0.94075	0.998342	14698	0	0.43209	0.041928	0.12076	0.998848	1778	3	0.43209
FBgn0051961	4	0.86613	0.86571	0.989455	13527	0	0.3729	0.04195	0.10209	0.99685	1779	2	0.3729
FBgn0266622	4	0.98316	0.98316	0.999085	15368	0	0.43439	0.042058	0.10233	0.99685	1780	3	0.43439
FBgn0030336	6	0.072149	0.18821	0.979758	2777	3	-0.26044	0.042128	0.12124	0.998848	1781	2	-0.26044
FBgn0042696	6	0.32054	0.50038	0.988564	7581	1	0.19993	0.042134	0.12125	0.998848	1782	3	0.19993
FBgn0034446	6	0.26229	0.4555	0.986685	6798	2	0.18633	0.042134	0.12125	0.998848	1783	3	0.18633
FBgn0034437	6	0.083973	0.20646	0.979758	3100	3	-0.13328	0.042134	0.12125	0.998848	1784	1	-0.13328
FBgn0039258	6	0.93403	0.93387	0.998342	14592	0	0.17295	0.042134	0.12125	0.998848	1785	2	0.17295
FBgn0031826	6	0.95497	0.95493	0.998342	14929	0	0.2516	0.042234	0.12149	0.998848	1786	3	0.2516
FBgn0003377	5	0.66337	0.70938	0.989455	11395	1	-0.1011	0.042257	0.11848	0.998848	1787	2	-0.1011
FBgn0036585	5	0.32956	0.47753	0.987223	7688	1	0.72884	0.042285	0.11852	0.998848	1788	3	0.72884
FBgn0263982	2	0.90594	0.90564	0.998342	14182	0	0.82332	0.042294	0.076109	0.99685	1789	2	0.82332
FBgn0265736	4	0.9802	0.98019	0.999085	15325	0	0.52634	0.042309	0.10283	0.99685	1790	3	0.52634
FBgn0020416	6	0.47839	0.62795	0.988564	9410	2	-0.0016053	0.042378	0.12178	0.998848	1791	2	-0.0016053
FBgn0036154	6	0.45141	0.60563	0.988564	9080	2	0.11595	0.04241	0.12185	0.998848	1792	1	0.11595
FBgn0265743	4	0.27649	0.40612	0.979758	6984	1	0.17271	0.042436	0.1031	0.99685	1793	2	0.17271
FBgn0040005	6	0.0042355	0.017688	0.926279	274	1	0.45647	0.042442	0.12194	0.998848	1794	3	0.45647
FBgn0011274	6	0.10415	0.23674	0.979758	3550	3	0.16228	0.042442	0.12194	0.998848	1795	3	0.16228
FBgn0083961	6	0.3876	0.5536	0.988564	8420	2	0.44562	0.042442	0.12194	0.998848	1796	3	0.44562
FBgn0013576	24	0.12038	0.38673	0.979758	3935	9	-0.001227	0.042458	0.19321	0.998848	1797	8	-0.001227
FBgn0264887	1	0.95746	0.95778	0.998342	14982	0	1.8583	0.042537	0.042493	0.992403	1798	1	1.8583
FBgn0041710	6	0.56464	0.70191	0.988564	10348	2	0.22428	0.0426	0.12229	0.998848	1799	3	0.22428
FBgn0033657	6	0.56464	0.70191	0.988564	10487	2	0.37429	0.042655	0.12242	0.998848	1800	3	0.37429
FBgn0036757	6	0.21752	0.39652	0.979758	5936	2	0.045147	0.042685	0.1225	0.998848	1801	2	0.045147
FBgn0265382	4	0.33603	0.47363	0.986685	7881	2	-0.18025	0.042703	0.10366	0.99685	1802	1	-0.18025
FBgn0038425	6	0.20547	0.38025	0.979758	5684	2	0.35557	0.042783	0.12273	0.998848	1803	3	0.35557
FBgn0039378	6	0.96971	0.96983	0.998471	15170	0	0.36696	0.042803	0.12278	0.998848	1804	4	0.36696
FBgn0045852	10	0.012233	0.054777	0.950637	688	3	0.32489	0.04282	0.14885	0.998848	1805	6	0.32489
FBgn0014143	6	0.67562	0.7551	0.989455	11500	1	0.41812	0.042898	0.12302	0.998848	1806	4	0.41812
FBgn0053169	6	0.91149	0.91121	0.998342	14255	0	0.37308	0.042898	0.12302	0.998848	1807	4	0.37308
FBgn0010611	10	0.27365	0.51821	0.988564	6942	4	-0.050611	0.042899	0.14906	0.998848	1808	3	-0.050611
FBgn0003392	6	0.28789	0.47526	0.986685	7143	2	0.22289	0.042925	0.12309	0.998848	1809	3	0.22289
FBgn0034792	4	0.79406	0.79351	0.989455	12693	0	0.33073	0.042944	0.10417	0.99685	1810	3	0.33073
FBgn0039403	5	0.90255	0.9028	0.998342	14128	0	0.30728	0.04295	0.11975	0.998848	1811	2	0.30728
FBgn0032609	4	0.77641	0.77575	0.989455	12479	0	0.31214	0.042962	0.10421	0.99685	1812	3	0.31214
FBgn0087021	6	0.56464	0.70191	0.988564	10408	2	0.053176	0.04297	0.12318	0.998848	1813	3	0.053176
FBgn0033600	6	0.23469	0.41963	0.979758	6192	1	0.2216	0.043014	0.12329	0.998848	1814	3	0.2216
FBgn0030354	6	0.56464	0.70191	0.988564	10569	2	-0.23654	0.043029	0.12332	0.998848	1815	2	-0.23654
FBgn0028741	1	0.95695	0.95725	0.998342	14969	0	0.80422	0.043048	0.043016	0.992403	1816	1	0.80422
FBgn0265947	4	0.82755	0.82704	0.989455	13091	0	0.43068	0.043067	0.10442	0.99685	1817	3	0.43068
FBgn0264911	6	0.56313	0.70061	0.988564	10259	1	0.45646	0.043121	0.12355	0.998848	1818	4	0.45646
FBgn0035412	6	0.027456	0.084758	0.950637	1291	2	0.34552	0.043121	0.12355	0.998848	1819	4	0.34552
FBgn0058470	6	0.21991	0.39973	0.979758	5978	3	0.15244	0.043159	0.12364	0.998848	1820	3	0.15244
FBgn0034664	5	0.34877	0.49601	0.988564	8023	2	-0.14654	0.043203	0.1202	0.998848	1821	2	-0.14654
FBgn0264616	4	0.93401	0.93369	0.998342	14587	0	0.56467	0.043231	0.10474	0.99685	1822	3	0.56467
FBgn0036155	6	0.59026	0.72227	0.989455	10784	1	0.51096	0.043279	0.12391	0.998848	1823	3	0.51096
FBgn0020445	6	0.18064	0.34607	0.979758	5223	3	-0.16954	0.043303	0.12398	0.998848	1824	2	-0.16954
FBgn0262482	6	0.82947	0.83842	0.989455	13115	1	0.75595	0.043417	0.12424	0.998848	1825	4	0.75595
FBgn0267576	4	0.093977	0.19737	0.979758	3322	1	0.47545	0.043493	0.10531	0.99685	1826	2	0.47545
FBgn0030245	6	0.94797	0.9478	0.998342	14801	0	0.3486	0.043513	0.12446	0.998848	1827	4	0.3486
FBgn0035449	6	0.91656	0.91623	0.998342	14327	0	0.15188	0.043544	0.12453	0.998848	1828	2	0.15188
FBgn0031128	9	0.051234	0.16076	0.967275	2116	3	-0.13229	0.043565	0.14634	0.998848	1829	3	-0.13229
FBgn0037038	6	0.59755	0.72483	0.989455	10843	1	0.36922	0.043569	0.12458	0.998848	1830	4	0.36922
FBgn0027599	4	0.88932	0.88882	0.998342	13912	0	0.54554	0.0437	0.10572	0.99685	1831	3	0.54554
FBgn0036822	6	0.027352	0.084471	0.950637	1287	2	-0.017817	0.043716	0.12492	0.998848	1832	1	-0.017817
FBgn0265995	3	0.7097	0.70979	0.989455	11791	0	0.5097	0.043742	0.097063	0.99685	1833	2	0.5097
FBgn0053296	6	0.2994	0.48401	0.988564	7294	1	0.031477	0.04377	0.12504	0.998848	1834	3	0.031477
FBgn0261593	6	0.043784	0.12402	0.967275	1873	1	0.43924	0.043835	0.12519	0.998848	1835	4	0.43924
FBgn0278608	6	0.87515	0.8755	0.989455	13793	1	0.34722	0.043835	0.12519	0.998848	1836	4	0.34722
FBgn0023178	6	0.040861	0.11709	0.967275	1782	2	0.47632	0.043835	0.12519	0.998848	1837	4	0.47632
FBgn0036491	6	0.77157	0.80149	0.989455	12426	1	0.16728	0.043843	0.12521	0.998848	1838	2	0.16728
FBgn0025335	8	0.70171	0.81743	0.989455	11721	1	0.38269	0.04385	0.13957	0.998848	1839	5	0.38269
FBgn0031681	3	0.59891	0.60269	0.988564	10857	1	0.82951	0.043856	0.097224	0.99685	1840	2	0.82951
FBgn0262961	6	0.045706	0.12853	0.967275	1922	2	0.29028	0.043906	0.12537	0.998848	1841	3	0.29028
FBgn0030921	6	0.10985	0.24511	0.979758	3685	2	-0.14421	0.043922	0.12541	0.998848	1842	1	-0.14421
FBgn0034179	6	0.41722	0.57759	0.988564	8724	1	0.31795	0.043942	0.12546	0.998848	1843	4	0.31795
FBgn0036406	6	0.2432	0.43109	0.980065	6541	2	-0.24748	0.044008	0.12563	0.998848	1844	2	-0.24748
FBgn0267547	4	0.47675	0.55581	0.988564	9394	1	0.4416	0.044045	0.10639	0.99685	1845	2	0.4416
FBgn0043535	6	0.80879	0.82419	0.989455	12871	1	0.32358	0.044122	0.12588	0.998848	1846	4	0.32358
FBgn0250833	6	0.25688	0.44916	0.986685	6730	1	0.0069455	0.044128	0.1259	0.998848	1847	2	0.0069455
FBgn0264817	6	0.080965	0.20193	0.979758	3029	3	-0.25861	0.044231	0.12614	0.998848	1848	2	-0.25861
FBgn0041092	6	0.3018	0.48589	0.988564	7325	1	0.57102	0.044342	0.12637	0.998848	1849	3	0.57102
FBgn0267550	4	0.98937	0.9894	0.999085	15462	0	0.54618	0.044359	0.10703	0.99685	1850	3	0.54618
FBgn0037325	6	0.87515	0.8755	0.989455	13621	1	0.090299	0.044368	0.12642	0.998848	1851	2	0.090299
FBgn0011230	6	0.91263	0.91235	0.998342	14278	0	0.27634	0.044369	0.12643	0.998848	1852	3	0.27634
FBgn0004864	4	0.75019	0.74998	0.989455	12137	1	0.40405	0.044393	0.10708	0.99685	1853	3	0.40405
FBgn0036498	6	0.87515	0.8755	0.989455	13732	1	0.38465	0.044494	0.12672	0.998848	1854	4	0.38465
FBgn0040070	6	0.90437	0.90409	0.998342	14160	0	0.21514	0.04454	0.12682	0.998848	1855	2	0.21514
FBgn0038149	6	0.25154	0.44213	0.986685	6652	2	0.00534	0.044551	0.12684	0.998848	1856	2	0.00534
FBgn0038718	6	0.90124	0.90103	0.998342	14101	0	0.2952	0.044561	0.12687	0.998848	1857	4	0.2952
FBgn0003997	16	0.70047	0.88933	0.998342	11702	2	0.23483	0.044586	0.17805	0.998848	1858	8	0.23483
FBgn0030839	6	0.018644	0.06253	0.950637	946	4	-0.72936	0.044609	0.127	0.998848	1859	1	-0.72936
FBgn0037360	3	0.79139	0.79116	0.989455	12663	0	0.53171	0.044655	0.098342	0.99685	1860	2	0.53171
FBgn0050195	6	0.68509	0.7591	0.989455	11570	1	0.5252	0.044675	0.12715	0.998848	1861	4	0.5252
FBgn0260764	6	0.24289	0.43067	0.979758	6437	3	0.31626	0.044675	0.12715	0.998848	1862	3	0.31626
FBgn0036717	6	0.92839	0.9282	0.998342	14502	0	0.29759	0.044675	0.12715	0.998848	1863	3	0.29759
FBgn0265139	6	0.030248	0.091692	0.953735	1418	2	0.040732	0.044712	0.12723	0.998848	1864	2	0.040732
FBgn0051515	6	0.99558	0.99561	0.999085	15571	0	0.64649	0.044716	0.12724	0.998848	1865	4	0.64649
FBgn0030455	4	0.98908	0.98911	0.999085	15457	0	0.32186	0.044723	0.10775	0.99685	1866	3	0.32186
FBgn0032899	6	0.85092	0.85462	0.989455	13387	1	0.16966	0.044749	0.12732	0.998848	1867	3	0.16966
FBgn0262604	4	0.9473	0.94712	0.998342	14787	0	0.076872	0.044749	0.10781	0.99685	1868	1	0.076872
FBgn0029924	6	0.24289	0.43067	0.979758	6526	3	0.0062768	0.04479	0.12742	0.998848	1869	2	0.0062768
FBgn0030976	6	0.73871	0.78393	0.989455	12037	1	0.47733	0.044814	0.12747	0.998848	1870	4	0.47733
FBgn0021742	6	0.0061745	0.024877	0.926279	380	4	-0.7049	0.044864	0.1276	0.998848	1871	2	-0.7049
FBgn0035922	4	0.88371	0.88327	0.995298	13891	0	0.70558	0.04487	0.10805	0.99685	1872	3	0.70558
FBgn0029838	6	0.32407	0.50323	0.988564	7628	2	0.13053	0.044883	0.12764	0.998848	1873	2	0.13053
FBgn0038214	5	0.082306	0.18482	0.979758	3065	1	-0.067068	0.0449	0.12323	0.998848	1874	1	-0.067068
FBgn0031517	6	0.63042	0.73697	0.989455	11106	1	0.15232	0.044922	0.12772	0.998848	1875	3	0.15232
FBgn0262097	4	0.18938	0.30698	0.979758	5375	1	0.58642	0.044956	0.10824	0.99685	1876	3	0.58642
FBgn0042180	6	0.1395	0.28814	0.979758	4349	2	0.34506	0.045008	0.12791	0.998848	1877	4	0.34506
FBgn0035315	6	0.24002	0.42677	0.979758	6273	2	0.38933	0.045029	0.12796	0.998848	1878	4	0.38933
FBgn0037770	6	0.89427	0.89411	0.998342	13985	0	0.4252	0.045029	0.12796	0.998848	1879	4	0.4252
FBgn0067783	4	0.040286	0.097874	0.963993	1762	1	0.25539	0.045071	0.10847	0.99685	1880	2	0.25539
FBgn0028525	6	0.077234	0.19627	0.979758	2876	3	-0.11387	0.045089	0.12809	0.998848	1881	2	-0.11387
FBgn0040730	6	0.87515	0.8755	0.989455	13690	1	0.34186	0.045197	0.12835	0.998848	1882	3	0.34186
FBgn0030675	6	0.96089	0.96093	0.998342	15028	0	0.28655	0.045245	0.12846	0.998848	1883	3	0.28655
FBgn0029915	8	0.43049	0.64481	0.988564	8846	3	0.3404	0.045253	0.14317	0.998848	1884	5	0.3404
FBgn0036519	6	0.80411	0.8211	0.989455	12814	1	0.026513	0.045264	0.1285	0.998848	1885	3	0.026513
FBgn0039831	6	0.93403	0.93387	0.998342	14594	0	0.095106	0.045287	0.12856	0.998848	1886	3	0.095106
FBgn0030623	6	0.46203	0.61445	0.988564	9234	1	-0.047879	0.045295	0.12858	0.998848	1887	2	-0.047879
FBgn0264567	4	0.60198	0.63158	0.988564	10881	1	0.51612	0.045298	0.10889	0.99685	1888	3	0.51612
FBgn0264822	4	0.061791	0.14137	0.967275	2409	2	0.11178	0.045326	0.10895	0.99685	1889	2	0.11178
FBgn0029840	6	0.28445	0.4726	0.986685	7099	1	0.29855	0.045437	0.12889	0.998848	1890	3	0.29855
FBgn0031654	6	0.14557	0.29669	0.979758	4487	1	0.40879	0.045437	0.12889	0.998848	1891	3	0.40879
FBgn0267005	4	0.94269	0.94245	0.998342	14727	0	0.6022	0.045458	0.10923	0.99685	1892	3	0.6022
FBgn0034082	6	0.56464	0.70191	0.988564	10567	2	0.40057	0.045465	0.12896	0.998848	1893	4	0.40057
FBgn0033327	2	0.95452	0.95441	0.998342	14923	0	0.98467	0.045478	0.081502	0.99685	1894	2	0.98467
FBgn0038961	3	0.13734	0.22506	0.979758	4309	1	0.30759	0.045536	0.099591	0.99685	1895	2	0.30759
FBgn0262891	6	0.25147	0.44204	0.986685	6651	2	0.40771	0.045567	0.1292	0.998848	1896	4	0.40771
FBgn0034214	5	0.25956	0.41089	0.979758	6772	2	-0.17322	0.045644	0.1246	0.998848	1897	1	-0.17322
FBgn0039283	6	0.81719	0.82977	0.989455	12964	1	-0.051862	0.045672	0.12945	0.998848	1898	2	-0.051862
FBgn0261554	8	0.10451	0.25946	0.979758	3558	2	0.0404	0.045702	0.14435	0.998848	1899	3	0.0404
FBgn0050147	4	0.92375	0.92344	0.998342	14435	0	0.18856	0.045759	0.10982	0.99685	1900	1	0.18856
FBgn0030655	6	0.24556	0.43417	0.982302	6571	2	0.32422	0.045775	0.12968	0.998848	1901	3	0.32422
FBgn0001099	3	0.54833	0.55914	0.988564	10152	1	0.30882	0.045795	0.099962	0.99685	1902	2	0.30882
FBgn0038858	4	0.13552	0.24522	0.979758	4275	1	0.46025	0.045802	0.10991	0.99685	1903	3	0.46025
FBgn0040228	6	0.84908	0.85318	0.989455	13357	1	0.53732	0.045814	0.12977	0.998848	1904	4	0.53732
FBgn0035006	6	0.13545	0.28242	0.979758	4273	1	0.56067	0.045814	0.12977	0.998848	1905	4	0.56067
FBgn0040348	6	0.017239	0.058832	0.950637	886	3	0.033959	0.045842	0.12983	0.998848	1906	3	0.033959
FBgn0264343	6	0.4659	0.61764	0.988564	9275	2	-0.048275	0.045853	0.12985	0.998848	1907	2	-0.048275
FBgn0038450	6	0.51177	0.65612	0.988564	9793	1	0.33537	0.045928	0.13007	0.998848	1908	4	0.33537
FBgn0085230	6	0.87515	0.8755	0.989455	13631	1	0.32125	0.045928	0.13007	0.998848	1909	4	0.32125
FBgn0034351	4	0.46419	0.54892	0.988564	9264	1	0.53489	0.046054	0.11044	0.99685	1910	3	0.53489
FBgn0023172	4	0.71768	0.7201	0.989455	11875	1	0.4347	0.046057	0.11045	0.99685	1911	2	0.4347
FBgn0040466	4	0.86977	0.86937	0.989455	13548	0	-0.065675	0.046127	0.11057	0.99685	1912	1	-0.065675
FBgn0040011	6	0.76044	0.7953	0.989455	12327	1	0.54999	0.046157	0.13056	0.998848	1913	4	0.54999
FBgn0050416	6	0.45529	0.60886	0.988564	9129	1	0.53529	0.046157	0.13056	0.998848	1914	4	0.53529
FBgn0266151	4	0.099219	0.20347	0.979758	3441	1	0.38842	0.046177	0.11068	0.99685	1915	3	0.38842
FBgn0265413	6	0.98305	0.98305	0.999085	15367	0	0.25359	0.046182	0.13062	0.998848	1916	3	0.25359
FBgn0034126	6	0.9271	0.92691	0.998342	14486	0	-0.066353	0.046186	0.13063	0.998848	1917	2	-0.066353
FBgn0037255	6	0.10668	0.2404	0.979758	3619	3	-0.45923	0.046263	0.13081	0.998848	1918	2	-0.45923
FBgn0037153	6	0.9701	0.97022	0.998471	15179	0	0.30063	0.046392	0.13111	0.998848	1919	3	0.30063
FBgn0040237	4	0.48649	0.56114	0.988564	9507	1	0.18418	0.046425	0.11116	0.99685	1920	2	0.18418
FBgn0051720	6	0.61016	0.72938	0.989455	10934	1	0.38776	0.046449	0.13122	0.998848	1921	4	0.38776
FBgn0051789	6	0.89206	0.89193	0.998342	13960	0	0.40247	0.046469	0.13127	0.998848	1922	3	0.40247
FBgn0032075	6	0.87515	0.8755	0.989455	13715	1	0.28967	0.046529	0.13141	0.998848	1923	3	0.28967
FBgn0266976	4	0.68347	0.69136	0.988564	11556	1	0.32534	0.046534	0.11137	0.99685	1924	2	0.32534
FBgn0266595	4	0.60503	0.63357	0.988564	10900	1	0.51423	0.046534	0.11137	0.99685	1925	3	0.51423
FBgn0063127	4	0.23649	0.36071	0.979758	6221	1	0.57215	0.046585	0.11148	0.99685	1926	3	0.57215
FBgn0034817	6	0.9458	0.94562	0.998342	14766	0	0.3059	0.046629	0.13165	0.998848	1927	4	0.3059
FBgn0260397	6	0.32664	0.50523	0.988564	7660	1	0.38161	0.04664	0.13166	0.998848	1928	3	0.38161
FBgn0261630	6	0.83694	0.84398	0.989455	13201	1	0.34222	0.04664	0.13166	0.998848	1929	3	0.34222
FBgn0265726	12	0.16891	0.40384	0.979758	4981	5	0.14149	0.046647	0.17021	0.998848	1930	6	0.14149
FBgn0037383	4	0.97093	0.97068	0.998471	15194	0	0.61448	0.046661	0.11163	0.99685	1931	3	0.61448
FBgn0033569	6	0.56313	0.70061	0.988564	10260	2	-0.087261	0.046674	0.13173	0.998848	1932	2	-0.087261
FBgn0037418	6	0.50391	0.64943	0.988564	9703	1	0.3982	0.046698	0.13178	0.998848	1933	4	0.3982
FBgn0034394	6	0.69408	0.76295	0.989455	11647	1	0.34262	0.046698	0.13178	0.998848	1934	4	0.34262
FBgn0264262	4	0.21509	0.33646	0.979758	5897	1	0.46842	0.046715	0.11175	0.99685	1935	3	0.46842
FBgn0023512	4	0.9735	0.97328	0.998526	15234	0	0.54517	0.046715	0.11175	0.99685	1936	3	0.54517
FBgn0265709	4	0.75019	0.74998	0.989455	12113	1	0.47292	0.046715	0.11175	0.99685	1937	3	0.47292
FBgn0014454	6	0.98976	0.98979	0.999085	15470	0	0.35315	0.046752	0.13191	0.998848	1938	4	0.35315
FBgn0052198	6	0.63531	0.73884	0.989455	11151	1	0.33815	0.046752	0.13191	0.998848	1939	3	0.33815
FBgn0026061	7	0.33717	0.54579	0.988564	7894	3	-0.12896	0.046793	0.14195	0.998848	1940	2	-0.12896
FBgn0036421	5	0.11244	0.23585	0.979758	3735	2	0.20795	0.046828	0.12667	0.998848	1941	2	0.20795
FBgn0034081	4	0.71542	0.7181	0.989455	11850	1	0.70246	0.046838	0.112	0.99685	1942	3	0.70246
FBgn0261686	6	0.89061	0.89047	0.998342	13935	0	0.35621	0.046846	0.13212	0.998848	1943	4	0.35621
FBgn0031804	5	0.21947	0.37282	0.979758	5966	2	-0.061446	0.046874	0.12674	0.998848	1944	1	-0.061446
FBgn0033988	6	0.97895	0.97899	0.999085	15297	0	0.28012	0.046901	0.13225	0.998848	1945	4	0.28012
FBgn0021767	6	0.030776	0.09299	0.956022	1437	4	-0.70598	0.046918	0.13227	0.998848	1946	2	-0.70598
FBgn0005655	6	0.39162	0.55692	0.988564	8478	2	0.24801	0.046953	0.13235	0.998848	1947	3	0.24801
FBgn0035695	6	0.79591	0.81591	0.989455	12713	1	0.14028	0.047009	0.13247	0.998848	1948	2	0.14028
FBgn0264753	6	0.46081	0.61344	0.988564	9219	2	-0.066321	0.047009	0.13247	0.998848	1949	1	-0.066321
FBgn0040968	4	0.92068	0.92033	0.998342	14403	0	0.37008	0.047095	0.1125	0.99705	1950	3	0.37008
FBgn0028746	6	0.67925	0.75659	0.989455	11530	1	0.39139	0.047135	0.13275	0.998848	1951	3	0.39139
FBgn0050145	6	0.11919	0.25895	0.979758	3900	2	0.25837	0.047146	0.13277	0.998848	1952	2	0.25837
FBgn0036410	6	0.17695	0.34099	0.979758	5132	2	0.13544	0.047213	0.13293	0.998848	1953	3	0.13544
FBgn0029888	4	0.0091878	0.030176	0.943341	526	2	-0.36209	0.047263	0.11281	0.997395	1954	2	-0.36209
FBgn0037098	6	0.48336	0.63211	0.988564	9473	1	0.54982	0.047304	0.13315	0.998848	1955	4	0.54982
FBgn0030648	6	0.71539	0.77265	0.989455	11841	1	0.40878	0.047304	0.13315	0.998848	1956	4	0.40878
FBgn0034152	6	0.064176	0.17067	0.967275	2463	3	-0.41468	0.047366	0.13329	0.998848	1957	2	-0.41468
FBgn0025740	6	0.82659	0.8363	0.989455	13080	1	0.33947	0.047366	0.13329	0.998848	1958	3	0.33947
FBgn0010747	6	0.74255	0.7859	0.989455	12062	1	0.32967	0.047381	0.13333	0.998848	1959	4	0.32967
FBgn0036310	6	0.95609	0.95605	0.998342	14959	0	0.52353	0.047386	0.13334	0.998848	1960	4	0.52353
FBgn0043455	7	0.91173	0.91193	0.998342	14258	1	0.57645	0.047397	0.14322	0.998848	1961	4	0.57645
FBgn0267678	4	0.54202	0.59316	0.988564	10111	1	-0.13661	0.047411	0.1131	0.997395	1962	2	-0.13661
FBgn0266964	4	0.79864	0.79816	0.989455	12751	0	0.80809	0.047415	0.1131	0.997395	1963	3	0.80809
FBgn0039016	4	0.18388	0.30074	0.979758	5278	2	0.11695	0.047506	0.11328	0.997395	1964	2	0.11695
FBgn0034473	6	0.42223	0.58171	0.988564	8767	2	-0.12232	0.047509	0.1336	0.998848	1965	2	-0.12232
FBgn0038150	6	0.073684	0.19091	0.979758	2812	1	0.064126	0.047522	0.13363	0.998848	1966	2	0.064126
FBgn0028380	6	0.69308	0.76257	0.989455	11636	1	0.2355	0.047594	0.1338	0.998848	1967	3	0.2355
FBgn0010014	6	0.73871	0.78393	0.989455	12038	1	-0.14192	0.047625	0.13387	0.998848	1968	1	-0.14192
FBgn0267798	3	0.31904	0.39465	0.979758	7557	1	0.52161	0.047625	0.1026	0.99685	1969	2	0.52161
FBgn0033437	4	0.75019	0.74998	0.989455	12219	1	0.28853	0.047695	0.11366	0.997395	1970	2	0.28853
FBgn0036264	6	0.061034	0.16358	0.967275	2385	2	0.23897	0.047727	0.13411	0.998848	1971	3	0.23897
FBgn0010278	6	0.98941	0.98943	0.999085	15463	0	0.43295	0.047727	0.13411	0.998848	1972	3	0.43295
FBgn0052811	6	0.90519	0.90492	0.998342	14172	0	0.37609	0.04778	0.13423	0.998848	1973	4	0.37609
FBgn0037777	6	0.40156	0.56495	0.988564	8575	2	-0.22347	0.047874	0.13444	0.998848	1974	2	-0.22347
FBgn0040719	6	0.25991	0.45313	0.986685	6774	1	-0.17002	0.047874	0.13444	0.998848	1975	2	-0.17002
FBgn0000442	6	0.93288	0.9327	0.998342	14571	0	0.044022	0.047874	0.13444	0.998848	1976	2	0.044022
FBgn0030756	6	0.12638	0.2694	0.979758	4067	2	0.13864	0.047967	0.13467	0.998848	1977	2	0.13864
FBgn0263037	6	0.48406	0.63273	0.988564	9482	2	0.30434	0.048044	0.13484	0.998848	1978	3	0.30434
FBgn0016123	6	0.2144	0.39228	0.979758	5877	2	0.25341	0.048044	0.13484	0.998848	1979	3	0.25341
FBgn0264540	6	0.83261	0.8407	0.989455	13148	1	0.32922	0.048139	0.13504	0.998848	1980	3	0.32922
FBgn0030599	4	0.50986	0.57426	0.988564	9775	1	0.47362	0.048166	0.11454	0.997395	1981	3	0.47362
FBgn0039787	6	0.59026	0.72227	0.989455	10783	1	0.27804	0.04818	0.13514	0.998848	1982	3	0.27804
FBgn0267279	4	0.18262	0.29926	0.979758	5256	2	0.22204	0.048252	0.11472	0.997395	1983	2	0.22204
FBgn0267990	4	0.84512	0.84459	0.989455	13303	0	0.58957	0.048252	0.11472	0.997395	1984	3	0.58957
FBgn0085282	6	0.061754	0.1652	0.967275	2408	3	-0.35678	0.04831	0.13544	0.998848	1985	1	-0.35678
FBgn0036817	6	0.15257	0.3066	0.979758	4633	3	0.15329	0.048325	0.13547	0.998848	1986	3	0.15329
FBgn0265153	4	0.5134	0.57626	0.988564	9812	1	0.40954	0.048347	0.11489	0.997395	1987	3	0.40954
FBgn0085292	6	0.76834	0.7997	0.989455	12397	1	0.32714	0.048383	0.1356	0.998848	1988	3	0.32714
FBgn0036760	6	0.59389	0.72353	0.989455	10814	1	0.39154	0.048396	0.13563	0.998848	1989	4	0.39154
FBgn0260866	6	0.40477	0.56757	0.988564	8604	1	0.014481	0.048412	0.13566	0.998848	1990	1	0.014481
FBgn0023531	6	0.48116	0.63023	0.988564	9445	1	0.31418	0.048444	0.13574	0.998848	1991	4	0.31418
FBgn0015550	6	0.68847	0.76058	0.989455	11600	1	0.2714	0.048507	0.1359	0.998848	1992	3	0.2714
FBgn0263110	6	0.75713	0.79352	0.989455	12308	1	0.48242	0.048542	0.13598	0.998848	1993	3	0.48242
FBgn0034389	8	0.078494	0.21362	0.979758	2916	3	0.023755	0.048555	0.15156	0.998848	1994	3	0.023755
FBgn0039232	6	0.91105	0.91077	0.998342	14248	0	0.60314	0.048559	0.13601	0.998848	1995	4	0.60314
FBgn0039452	6	0.80537	0.82193	0.989455	12832	1	0.31965	0.048559	0.13601	0.998848	1996	4	0.31965
FBgn0028534	6	0.45945	0.61229	0.988564	9198	1	0.17057	0.048583	0.13607	0.998848	1997	3	0.17057
FBgn0266252	4	0.21683	0.33843	0.979758	5923	2	-0.031485	0.048602	0.1154	0.998014	1998	2	-0.031485
FBgn0052704	3	0.95	0.95023	0.998342	14845	0	0.40826	0.04868	0.10415	0.99685	1999	2	0.40826
[truncated: 13,628 more rows]

## Sheet: 2C
	wt SAM	Lib8-empty	Lib8-CG8468 WGS-1	Lib8-CG8468 WGS-2	Lib8-CG8468 WGS-3	Lib8-CG8468 WGS-4	Lib8-CG8468 WGS-5	Lib8-CG8468 WGS-6
biological rep1	1.01039	0.904545	7.07769	7.06487	9.09164	12.9996	6.23084	3.41681
biological rep2	1.2264	1.10893	5.68986	8.43454	10.1193	12.6585	7.22658	5.24552
biological rep3	1.08354	0.996929	5.70094	5.42293	14.6083	14.9723	7.32526	3.85156
Unpaired t test	wt SAM vs. Lib8-empty		Lib8-CG8468 WGS-1 vs. Lib8-empty	Lib8-CG8468 WGS-2 vs. Lib8-empty	Lib8-CG8468 WGS-3 vs. Lib8-empty	Lib8-CG8468 WGS-4 vs. Lib8-empty	Lib8-CG8468 WGS-5 vs. Lib8-empty	Lib8-CG8468 WGS-6 vs. Lib8-empty
p value	0.2992		0.0004	0.0024	0.0037	<0.0001	<0.0001	0.0047

## Sheet: 2D
sgrna	DMSO-LFC	Rapa-LFC
CG8468-WGS6	0.77229	2.9988
CG8468-WGS1	0.6322	1.2053
CG8468-WGS2	-1.4411	0.86325
CG8468-WGS4	0.27788	2.6237
CG8468-WGS3	0.19293	2.9598
CG8468-WGS5	-0.0064227	3.2417

## Sheet: 2E
	lib8-blank	CG8468 WGS1	CG8468 WGS2	CG8468 WGS3	CG8468 WGS4	CG8468 WGS5	CG8468 WGS6
biological rep1	0.912759	1.21976	1.24158	1.52463	1.37116	1.2838	1.44959
biological rep2	0.883315	1.09933	1.06671	1.28507	1.09456	1.1514	1.43597
biological rep3	0.871865	1.21667	1.2513	1.4709	1.38298	1.22849	1.46049
Unpaired t test		CG8468 WGS1 vs. lib8-blank	CG8468 WGS2 vs. lib8-blank	CG8468 WGS3 vs. lib8-blank	CG8468 WGS4 vs. lib8-blank	CG8468 WGS5 vs. lib8-blank	CG8468 WGS6 vs. lib8-blank
p value		0.0022	0.0083	0.0019	0.0143	0.0012	<0.0001

## Sheet: 2F
	wt SAM	empty vector	sgCG5399 vector1	sgCG5399 vector2	sgCG5399 vector3	sgCG5399 vector4	sgCG5399 vector5	sgCG5399 vector6
biological rep1	0.868986	0.962002	120.272	117.118	2.71898	149.361	0.837445	224.525
biological rep2	1.13523	1.00471	140.077	131.911	3.01492	162.72	0.953245	270.251
biological rep3	1.01747	1.03462	138.562	106.289	3.11082	192.363	1.30521	192.014
Unpaired t test	wt SAM vs. empty vector		sgCG5399 vector1 vs. empty vector	sgCG5399 vector2 vs. empty vector	sgCG5399 vector3 vs. empty vector	sgCG5399 vector4 vs. empty vector	sgCG5399 vector5 vs. empty vector	sgCG5399 vector6 vs. empty vector
p value	0.9364		<0.0001	<0.0001	<0.0001	0.0002	0.8355	0.0006

## Sheet: 2G
sgrna	DMSO-LFC	Rapa-LFC
CG5399-WGS6	-0.9481	2.0966
CG5399-WGS4	-0.67066	1.3057
CG5399-WGS2	-0.35831	1.2718
CG5399-WGS1	-0.44913	1.4319
CG5399-WGS3	0.27142	-0.1212
CG5399-WGS5	-0.054995	0.42946

## Sheet: 2H
	Lib8-empty	Lib8-CG5399-WGS1	Lib8-CG5399-WGS2	Lib8-CG5399-WGS3	Lib8-CG5399-WGS4	Lib8-CG5399-WGS5	Lib8-CG5399-WGS6
biological rep1	0.912759	1.41585	1.55518	0.881275	1.29613	0.876404	2.19764
biological rep2	0.883315	1.70971	1.84114	0.895522	1.71754	0.705758	2.51665
biological rep3	0.871865	1.50935	1.44482	0.891452	1.21868	0.872191	2.22986
Unpaired t test		Lib8-CG5399-WGS1 vs. Lib8-empty	Lib8-CG5399-WGS2 vs. Lib8-empty	Lib8-CG5399-WGS3 vs. Lib8-empty	Lib8-CG5399-WGS4 vs. Lib8-empty	Lib8-CG5399-WGS5 vs. Lib8-empty	Lib8-CG5399-WGS6 vs. Lib8-empty
p value		0.0017	0.0036	0.994	0.0285	0.2833	0.0002

## Sheet: 2I
	wt SAM	Lib8-blank	Lib8-CG9932 WGS1	Lib8-CG9932 WGS2	Lib8-CG9932 WGS3	Lib8-CG9932 WGS4	Lib8-CG9932 WGS5	Lib8-CG9932 WGS6
biological rep1	0.968672	0.974502	1.65371	5.67962	6.78185	3.39462	2.17227	6.73505
biological rep2	1.00215	0.98846	1.64708	6.35927	5.61167	2.8533	1.39024	7.1091
biological rep3	1.25066	1.03815	1.4356	5.56819	6.43834	3.29254	1.49433	5.97845
Unpaired t test	wt SAM vs. Lib8-blank		Lib8-CG9932 WGS1 vs. Lib8-blank	Lib8-CG9932 WGS2 vs. Lib8-blank	Lib8-CG9932 WGS3 vs. Lib8-blank	Lib8-CG9932 WGS4 vs. Lib8-blank	Lib8-CG9932 WGS5 vs. Lib8-blank	Lib8-CG9932 WGS6 vs. Lib8-blank
p value	0.4649		0.0015	<0.0001	0.0001	0.0002	0.0495	<0.0001

## Sheet: 2J
sgrna	DMSO-LFC	Rapa-LFC
CG9932-WGS2	0.9293	3.8156
CG9932-WGS1	0.76198	0.25528
CG9932-WGS6	-0.57967	0.99941
CG9932-WGS5	-0.79597	-0.91692
CG9932-WGS4	-0.19256	0.17188
CG9932-WGS3	0.021759	2.8295

[truncated: 1 more sheets: 2K]
