# Supplementary material for: Pooled genome-wide CRISPR activation screening for rapamycin resistance genes in Drosophila cells
Source: eLife journal article supplement (doi:10.7554/elife.85542), 2023-04-10
Supplement: fig2-figsupp1-data1 [file Figure 2-figure supplement1 Source Data.xlsx]

## Sheet: S1B
Rapamycin concentration (M)	10-13	10-12	10-11	10-10	10-9	10-8
biological rep1	0.821374	0.390874	0.130107	0.101145	0.025936	0.0175657
biological rep2	0.794143	0.423943	0.101534	0.069091	0.022249	0.0159123
biological rep3	0.723656	0.384361	0.121897	0.072476	0.02287	0.0159627
biological rep4	0.683088	0.218779	0.113469	0.073031	0.031045	0.020311
biological rep5	0.674698	0.208115	0.114434	0.068752	0.030282	0.021685
biological rep6	0.77731	0.212931	0.113629	0.069138	0.028357	0.021963

## Sheet: S1C 15 days
id	num	neg|score	neg|p-value	neg|fdr	neg|rank	neg|goodsgrna	neg|lfc	pos|score	pos|p-value	pos|fdr	pos|rank	pos|goodsgrna	pos|lfc
FBgn0038681	10	1.8576e-08	4.9476e-06	0.001613	1	5	-1.0875	0.47886	0.66466	0.996536	408	2	-1.0875
FBgn0041094	10	7.3328e-08	4.9476e-06	0.001613	2	8	-1.0679	0.97702	0.97769	0.996536	637	0	-1.0679
FBgn0035425	10	0.0001094	0.00078666	0.170968	3	4	-0.6594	0.86181	0.8812	0.996536	568	1	-0.6594
FBgn0260645	9	0.00020796	0.0013111	0.21371	4	4	-1.0875	0.7354	0.80179	0.996536	529	1	-1.0875
FBgn0062412	10	0.00046675	0.0028053	0.365806	5	5	-0.90872	0.99143	0.99195	0.996536	649	0	-0.90872
FBgn0265784	10	0.00074118	0.0041807	0.401382	6	6	-0.54196	0.58512	0.73225	0.996536	450	2	-0.54196
FBgn0036038	10	0.00077538	0.0043093	0.401382	7	6	-0.71402	0.99063	0.99099	0.996536	648	0	-0.71402
FBgn0069056	10	0.0010455	0.0056155	0.457661	8	7	-0.5758	0.51441	0.68643	0.996536	420	2	-0.5758
FBgn0034307	10	0.0015022	0.0079309	0.574552	9	5	-0.55082	0.62371	0.75773	0.996536	472	2	-0.55082
FBgn0028538	10	0.0016567	0.0088809	0.579032	10	6	-0.92405	0.89337	0.90056	0.996536	583	1	-0.92405
FBgn0038584	10	0.002631	0.01369	0.743817	11	6	-0.44984	0.84412	0.87239	0.996536	563	1	-0.44984
FBgn0034179	8	0.0027994	0.012582	0.743817	12	4	-0.31047	0.64995	0.74156	0.996536	484	1	-0.31047
FBgn0035742	10	0.0037756	0.018153	0.78629	13	2	-1.0875	0.17218	0.36849	0.99178	236	3	-1.0875
FBgn0010316	7	0.003861	0.015689	0.78629	14	1	-0.149	0.67323	0.72173	0.996536	496	1	-0.149
FBgn0085384	10	0.0044182	0.020666	0.78629	15	3	-0.84812	0.39602	0.60639	0.996536	376	2	-0.84812
FBgn0001281	10	0.0045391	0.021111	0.78629	16	5	-0.49561	0.050134	0.1525	0.870242	108	2	-0.49561
FBgn0038862	10	0.0048261	0.022348	0.78629	17	4	-0.46952	0.24554	0.45136	0.99178	288	3	-0.46952
FBgn0259228	10	0.0048266	0.022358	0.78629	18	2	-0.26131	0.49133	0.67182	0.996536	412	2	-0.26131
FBgn0053098	10	0.005232	0.023921	0.78629	19	6	-0.95605	0.74471	0.8333	0.996536	533	1	-0.95605
FBgn0052311	10	0.0058841	0.026524	0.812482	20	5	-0.31776	0.18074	0.38164	0.99178	241	2	-0.31776
FBgn0029131	7	0.0061141	0.024119	0.78629	21	5	-0.32663	0.39043	0.5384	0.996536	372	1	-0.32663
FBgn0014011	10	0.0061526	0.027593	0.812482	22	3	-0.63621	0.23878	0.44436	0.99178	282	1	-0.63621
FBgn0260398	10	0.0064285	0.028661	0.812482	23	5	-0.39492	0.028837	0.096651	0.859828	71	4	-0.39492
FBgn0034356	10	0.0067886	0.030007	0.815188	24	4	-0.18631	0.36735	0.57651	0.996536	353	1	-0.18631
FBgn0042711	10	0.0074563	0.03251	0.847871	25	5	-0.30111	0.13817	0.31356	0.99178	204	2	-0.30111
FBgn0004784	10	0.0078864	0.034212	0.85794	26	6	-0.32587	0.11723	0.27742	0.972546	182	2	-0.32587
FBgn0035469	10	0.0083296	0.035746	0.860714	27	4	-0.22768	0.64016	0.76963	0.996536	478	1	-0.22768
FBgn0261858	10	0.0086481	0.036963	0.860714	28	2	-0.32156	0.47692	0.66335	0.996536	407	1	-0.32156
FBgn0034783	10	0.010516	0.044038	0.982236	29	4	-0.4797	0.37773	0.58717	0.996536	362	2	-0.4797
FBgn0001187	10	0.011405	0.047046	0.982236	30	4	0.014045	0.036333	0.11693	0.870242	83	4	0.014045
FBgn0004108	10	0.011776	0.048214	0.982236	31	2	-0.36467	0.60063	0.7425	0.996536	462	2	-0.36467
FBgn0022800	10	0.013079	0.052736	0.982236	32	4	-0.78739	0.59567	0.73929	0.996536	458	2	-0.78739
FBgn0019990	10	0.014774	0.058267	0.982236	33	5	-0.55747	0.53857	0.70144	0.996536	429	1	-0.55747
FBgn0051826	10	0.014895	0.058574	0.982236	34	2	-0.96914	0.84792	0.87434	0.996536	565	1	-0.96914
FBgn0010340	10	0.01671	0.06364	0.982236	35	4	-0.52029	0.61288	0.75049	0.996536	468	2	-0.52029
FBgn0033199	10	0.019557	0.071636	0.982236	36	1	-0.39293	0.18412	0.38697	0.99178	245	4	-0.39293
FBgn0266111	10	0.019834	0.072437	0.982236	37	3	-1.0875	0.2639	0.47012	0.99178	303	2	-1.0875
FBgn0035508	10	0.020193	0.073476	0.982236	38	2	-0.012109	0.28981	0.49639	0.995113	321	3	-0.012109
FBgn0262866	9	0.020412	0.070676	0.982236	39	1	-1.0875	0.92359	0.92143	0.996536	597	0	-1.0875
FBgn0015010	10	0.020992	0.075623	0.982236	40	5	-0.20759	0.20284	0.40677	0.99178	261	2	-0.20759
FBgn0036346	10	0.0242	0.084796	0.982236	41	2	-0.070395	0.22508	0.4302	0.99178	272	3	-0.070395
FBgn0052202	10	0.025672	0.088576	0.982236	42	4	-1.0875	0.59641	0.73968	0.996536	459	1	-1.0875
FBgn0031662	10	0.026394	0.090565	0.982236	43	5	-0.51604	0.16044	0.34978	0.99178	225	3	-0.51604
FBgn0030844	10	0.027283	0.093019	0.982236	44	3	-0.2684	0.6228	0.75728	0.996536	471	2	-0.2684
FBgn0039209	10	0.027622	0.093771	0.982236	45	2	0.021873	0.029537	0.098471	0.859828	74	4	0.021873
FBgn0053116	7	0.027839	0.083678	0.982236	46	1	-0.5427	0.181	0.33959	0.99178	242	2	-0.5427
FBgn0036827	10	0.027927	0.094454	0.982236	47	4	-0.31246	0.97563	0.97626	0.996536	636	0	-0.31246
FBgn0038541	10	0.028822	0.096829	0.982236	48	3	-0.64585	0.18506	0.38831	0.99178	246	3	-0.64585
FBgn0024329	10	0.030109	0.10028	0.982236	49	5	-0.4139	0.57754	0.72679	0.996536	447	1	-0.4139
FBgn0038921	10	0.030703	0.10173	0.982236	50	5	-0.30864	0.76901	0.84151	0.996536	539	1	-0.30864
FBgn0028847	10	0.030738	0.10184	0.982236	51	2	-0.88686	0.96458	0.96526	0.996536	626	0	-0.88686
FBgn0032304	10	0.031377	0.10356	0.982236	52	3	0.22595	0.018495	0.068222	0.843779	44	4	0.22595
FBgn0266696	10	0.031893	0.105	0.982236	53	4	-0.27478	0.29486	0.50188	0.995113	324	2	-0.27478
FBgn0034202	10	0.03219	0.10587	0.982236	54	4	-0.61675	0.3134	0.52083	0.996536	330	3	-0.61675
FBgn0030680	10	0.032837	0.10765	0.982236	55	3	0.087616	0.095108	0.23963	0.941535	164	4	0.087616
FBgn0037764	10	0.032898	0.10785	0.982236	56	5	-0.20906	0.95205	0.95262	0.996536	618	0	-0.20906
FBgn0038197	4	0.032999	0.079918	0.982236	57	3	-0.47001	0.95041	0.9505	0.996536	616	0	-0.47001
FBgn0003371	10	0.033445	0.10935	0.982236	58	4	-0.27652	0.010995	0.045522	0.843779	26	2	-0.27652
FBgn0004638	10	0.03419	0.11136	0.982236	59	3	-1.0875	0.039531	0.12549	0.870242	89	1	-1.0875
FBgn0033656	10	0.03419	0.11136	0.982236	60	1	-0.78354	0.062349	0.18146	0.881891	129	2	-0.78354
FBgn0005775	10	0.036303	0.11703	0.982236	61	5	-0.4187	0.09415	0.2379	0.941535	163	2	-0.4187
FBgn0030964	10	0.036482	0.11759	0.982236	62	2	0.08373	0.0023503	0.012354	0.808065	9	4	0.08373
FBgn0013672	10	0.038008	0.1217	0.982236	63	3	-0.81671	0.5922	0.73686	0.996536	455	1	-0.81671
FBgn0038448	10	0.038213	0.12233	0.982236	64	3	-0.26204	0.22385	0.42904	0.99178	271	3	-0.26204
FBgn0034687	10	0.038451	0.1229	0.982236	65	4	0.11988	0.019763	0.071933	0.843779	52	4	0.11988
FBgn0031995	10	0.039117	0.12462	0.982236	66	2	-1.0492	0.55148	0.70932	0.996536	437	2	-1.0492
FBgn0022382	7	0.0398	0.11353	0.982236	67	2	-0.15075	0.12436	0.25504	0.955673	189	3	-0.15075
FBgn0036964	9	0.040199	0.12468	0.982236	68	3	-1.0875	0.85683	0.86393	0.996536	567	1	-1.0875
FBgn0033128	10	0.040274	0.12744	0.982236	69	4	-0.24645	0.13183	0.30324	0.99178	199	3	-0.24645
FBgn0035143	9	0.041192	0.12665	0.982236	70	4	-0.33311	0.12708	0.28952	0.989508	194	2	-0.33311
FBgn0033047	10	0.041654	0.13096	0.982236	71	4	-0.88487	0.12145	0.28477	0.987594	185	2	-0.88487
FBgn0033473	10	0.04215	0.13243	0.982236	72	3	-0.0038075	0.10108	0.25023	0.94669	171	4	-0.0038075
FBgn0029858	10	0.042682	0.13389	0.982236	73	5	-0.37992	0.69578	0.8101	0.996536	510	2	-0.37992
FBgn0031610	10	0.042697	0.13392	0.982236	74	4	-0.57334	0.43802	0.64085	0.996536	391	2	-0.57334
FBgn0029114	10	0.043792	0.13671	0.982236	75	2	0.0093326	0.60409	0.74472	0.996536	463	2	0.0093326
FBgn0039277	10	0.043921	0.137	0.982236	76	4	-0.54316	0.35782	0.56691	0.996536	346	2	-0.54316
FBgn0015828	10	0.044088	0.1375	0.982236	77	2	-0.15497	0.68016	0.79838	0.996536	501	2	-0.15497
FBgn0032405	10	0.04416	0.13765	0.982236	78	3	-0.25379	0.015618	0.060316	0.843779	37	4	-0.25379
FBgn0041627	10	0.044784	0.13934	0.982236	79	4	-0.62889	0.64948	0.77626	0.996536	483	1	-0.62889
FBgn0011300	10	0.045603	0.14166	0.982236	80	3	0.078256	0.65143	0.77749	0.996536	487	2	0.078256
FBgn0038438	9	0.045945	0.13653	0.982236	81	3	-1.0875	0.97485	0.97347	0.996536	635	0	-1.0875
FBgn0264895	8	0.046386	0.12844	0.982236	82	2	0.037251	0.21395	0.38867	0.99178	269	3	0.037251
FBgn0039797	10	0.050134	0.15258	0.982236	83	3	-0.21025	0.24379	0.44954	0.99178	285	3	-0.21025
FBgn0010549	10	0.051718	0.15658	0.982236	84	4	-0.42881	0.89294	0.90034	0.996536	582	1	-0.42881
FBgn0086359	10	0.053144	0.16013	0.982236	85	3	-0.81229	0.956	0.95646	0.996536	623	0	-0.81229
FBgn0039125	10	0.053175	0.16023	0.982236	86	3	-0.12255	0.80845	0.85642	0.996536	548	1	-0.12255
FBgn0265193	10	0.054646	0.16438	0.982236	87	2	0.036638	0.021107	0.075643	0.843779	56	3	0.036638
FBgn0028500	10	0.056145	0.16814	0.982236	88	2	-0.59261	0.60675	0.74631	0.996536	465	1	-0.59261
FBgn0028983	10	0.05741	0.17128	0.982236	89	4	0.0093195	0.3191	0.52695	0.996536	333	3	0.0093195
FBgn0033491	10	0.059138	0.17553	0.982236	90	2	-0.18061	0.23652	0.44211	0.99178	280	3	-0.18061
FBgn0283499	10	0.060631	0.1792	0.982236	91	1	-0.063217	0.259	0.46533	0.99178	299	3	-0.063217
FBgn0002940	10	0.060674	0.17926	0.982236	92	3	-0.86587	0.59501	0.73883	0.996536	457	1	-0.86587
FBgn0053096	10	0.061128	0.18046	0.982236	93	3	-0.088013	0.39027	0.60047	0.996536	371	3	-0.088013
FBgn0052196	7	0.061832	0.16036	0.982236	94	1	-0.16434	0.69622	0.73438	0.996536	512	1	-0.16434
FBgn0031681	10	0.062122	0.18222	0.982236	95	3	-0.44592	0.84203	0.87128	0.996536	562	1	-0.44592
FBgn0037370	8	0.062954	0.16613	0.982236	96	4	-0.29397	0.73698	0.77967	0.996536	530	1	-0.29397
FBgn0036428	10	0.063045	0.1839	0.982236	97	3	-1.0527	0.54561	0.7057	0.996536	433	2	-1.0527
FBgn0036451	10	0.063431	0.18462	0.982236	98	3	0.0088164	0.94173	0.94241	0.996536	610	0	0.0088164
FBgn0031830	10	0.063611	0.18494	0.982236	99	4	-0.44384	0.56511	0.71825	0.996536	441	2	-0.44384
FBgn0063495	10	0.06473	0.18709	0.982236	100	3	-1.0875	0.28106	0.48716	0.992496	317	3	-1.0875
FBgn0003356	10	0.066583	0.1904	0.982236	101	2	-0.21407	0.93599	0.93641	0.996536	604	0	-0.21407
FBgn0021856	10	0.066967	0.19105	0.982236	102	3	-0.12034	0.23482	0.44041	0.99178	277	3	-0.12034
FBgn0037325	10	0.067018	0.19113	0.982236	103	4	-0.15496	0.1423	0.32025	0.99178	209	3	-0.15496
FBgn0020236	10	0.067038	0.19117	0.982236	104	3	-0.062272	0.071831	0.1982	0.88513	144	3	-0.062272
FBgn0032700	10	0.067904	0.19272	0.982236	105	3	-0.1708	0.18114	0.38222	0.99178	243	3	-0.1708
FBgn0033246	10	0.068065	0.19299	0.982236	106	2	-1.0875	0.37916	0.58863	0.996536	364	3	-1.0875
FBgn0003079	10	0.069546	0.19537	0.982236	107	2	-0.061278	0.93217	0.93244	0.996536	602	0	-0.061278
FBgn0025632	10	0.069647	0.19557	0.982236	108	2	0.069437	0.038015	0.12156	0.870242	86	4	0.069437
FBgn0031875	10	0.0725	0.20022	0.982236	109	2	-0.17051	0.3852	0.59517	0.996536	369	3	-0.17051
FBgn0033706	9	0.073105	0.18991	0.982236	110	3	-1.0875	0.91221	0.90979	0.996536	593	0	-1.0875
FBgn0039924	10	0.073181	0.20149	0.982236	111	3	-1.0875	0.33528	0.54401	0.996536	341	1	-1.0875
FBgn0001108	10	0.073974	0.20303	0.982236	112	3	-1.0875	0.70787	0.81917	0.996536	519	1	-1.0875
FBgn0000489	10	0.074075	0.20322	0.982236	113	3	-0.61612	0.21499	0.41991	0.99178	270	2	-0.61612
FBgn0037156	9	0.074657	0.19304	0.982236	114	3	-0.082612	0.87647	0.87792	0.996536	572	1	-0.082612
FBgn0039015	10	0.075872	0.20639	0.982236	115	4	-1.0875	0.16807	0.3622	0.99178	235	2	-1.0875
FBgn0002773	10	0.075872	0.20639	0.982236	116	2	0.21516	0.28046	0.48668	0.992496	316	3	0.21516
FBgn0260648	10	0.076916	0.20809	0.982236	117	2	-0.013235	0.070285	0.19556	0.881891	143	3	-0.013235
FBgn0041191	10	0.07814	0.21074	0.982236	118	3	-0.38719	0.087147	0.22537	0.941535	155	3	-0.38719
FBgn0050378	10	0.078384	0.21116	0.982236	119	3	-0.044455	0.053175	0.16017	0.870242	120	3	-0.044455
FBgn0038016	10	0.081313	0.21627	0.982236	120	3	0.1909	0.11389	0.27216	0.967198	180	4	0.1909
FBgn0262870	10	0.081917	0.21722	0.982236	121	3	-0.86945	0.48436	0.66772	0.996536	409	2	-0.86945
FBgn0046689	10	0.082512	0.21829	0.982236	122	3	-0.27185	0.19847	0.40211	0.99178	256	3	-0.27185
FBgn0036695	10	0.087333	0.22642	0.982236	123	4	-0.32497	0.060631	0.17839	0.881891	128	1	-0.32497
FBgn0000560	10	0.0886	0.22871	0.982236	124	1	-0.053572	0.048626	0.14875	0.870242	107	2	-0.053572
FBgn0002174	10	0.088623	0.22872	0.982236	125	4	-0.53325	0.75469	0.83657	0.996536	534	1	-0.53325
FBgn0038979	10	0.089339	0.23005	0.982236	126	2	0.083867	0.053011	0.15976	0.870242	118	5	0.083867
FBgn0034789	10	0.08945	0.23027	0.982236	127	4	-0.25145	0.54249	0.70387	0.996536	431	1	-0.25145
FBgn0030305	10	0.091247	0.2337	0.982236	128	4	-0.15173	0.8975	0.90337	0.996536	584	1	-0.15173
FBgn0050429	10	0.091253	0.23371	0.982236	129	2	-0.15842	0.92544	0.92566	0.996536	599	1	-0.15842
FBgn0020386	10	0.092457	0.23581	0.982236	130	2	0.34319	0.0033099	0.016282	0.808065	12	6	0.34319
FBgn0051902	10	0.092947	0.23652	0.982236	131	1	-0.17098	0.20038	0.40417	0.99178	259	3	-0.17098
FBgn0039153	10	0.093108	0.23679	0.982236	132	3	-0.31432	0.075446	0.20451	0.900937	146	3	-0.31432
FBgn0033504	10	0.094829	0.23981	0.982236	133	3	-0.21004	0.40991	0.6203	0.996536	381	1	-0.21004
FBgn0016794	9	0.094877	0.23196	0.982236	134	3	-0.6012	0.73735	0.80253	0.996536	531	1	-0.6012
FBgn0024992	10	0.095476	0.24094	0.982236	135	4	-0.48838	0.49808	0.67607	0.996536	415	2	-0.48838
FBgn0023023	10	0.09609	0.242	0.982236	136	3	-0.075151	0.016452	0.062532	0.843779	40	4	-0.075151
FBgn0042137	10	0.097566	0.24456	0.982236	137	3	-0.10941	0.58865	0.73439	0.996536	452	2	-0.10941
FBgn0267435	10	0.098713	0.24657	0.982236	138	4	-0.47227	0.99527	0.99542	0.997492	650	0	-0.47227
FBgn0259243	10	0.09907	0.2472	0.982236	139	4	-0.251	0.37978	0.58927	0.996536	365	1	-0.251
FBgn0036932	10	0.099571	0.24821	0.982236	140	4	-0.36692	0.63716	0.76746	0.996536	477	2	-0.36692
FBgn0261524	9	0.10083	0.24335	0.982236	141	4	-0.35728	0.76615	0.81518	0.996536	538	1	-0.35728
FBgn0037880	10	0.10108	0.2509	0.982236	142	4	-0.51725	0.9715	0.97209	0.996536	632	0	-0.51725
FBgn0010808	10	0.10177	0.25211	0.982236	143	3	-0.28451	0.44153	0.64284	0.996536	394	2	-0.28451
FBgn0040297	10	0.10177	0.25211	0.982236	144	4	-0.11562	0.70238	0.81544	0.996536	513	2	-0.11562
FBgn0267033	8	0.10225	0.24202	0.982236	145	3	-0.37531	0.12367	0.26998	0.967198	187	2	-0.37531
FBgn0029522	10	0.10267	0.25362	0.982236	146	3	-0.30248	0.18775	0.39106	0.99178	248	3	-0.30248
FBgn0039584	10	0.10401	0.25604	0.982236	147	2	-0.25846	0.084611	0.22094	0.941535	151	2	-0.25846
FBgn0036862	10	0.10445	0.25682	0.982236	148	2	-0.17272	0.27325	0.47949	0.992496	310	2	-0.17272
FBgn0034936	10	0.10645	0.26036	0.982236	149	3	0.13567	0.068569	0.19265	0.881891	139	4	0.13567
FBgn0031972	10	0.1073	0.26168	0.982236	150	2	-0.04839	0.19614	0.39961	0.99178	254	3	-0.04839
FBgn0061469	10	0.10778	0.26251	0.982236	151	3	-0.23356	0.10015	0.24847	0.94669	170	2	-0.23356
FBgn0035574	8	0.10848	0.25022	0.982236	152	3	-0.43789	0.60559	0.72504	0.996536	464	1	-0.43789
FBgn0030071	10	0.10975	0.26564	0.982236	153	4	-0.38177	0.15051	0.33353	0.99178	214	1	-0.38177
FBgn0262739	7	0.11027	0.2351	0.982236	154	2	-0.47962	0.085341	0.19613	0.881891	152	3	-0.47962
FBgn0034249	10	0.11046	0.26699	0.982236	155	3	-0.27701	0.31815	0.52606	0.996536	332	3	-0.27701
FBgn0000259	9	0.11128	0.26094	0.982236	156	3	-0.17554	0.95832	0.95718	0.996536	624	0	-0.17554
FBgn0030538	8	0.11391	0.25815	0.982236	157	3	-0.0099108	0.0095372	0.035914	0.843779	23	2	-0.0099108
FBgn0036282	8	0.11391	0.25815	0.982236	158	3	-1.0875	0.40614	0.56688	0.996536	380	1	-1.0875
FBgn0029999	7	0.11495	0.24203	0.982236	159	3	-0.70886	0.56863	0.67203	0.996536	442	1	-0.70886
FBgn0037647	10	0.11864	0.28044	0.982236	160	3	0.031031	0.37336	0.58247	0.996536	359	3	0.031031
FBgn0035522	10	0.11884	0.28084	0.982236	161	2	-0.3984	0.9808	0.98137	0.996536	640	0	-0.3984
FBgn0003890	8	0.11896	0.26478	0.982236	162	1	0.19836	0.26427	0.45324	0.99178	304	3	0.19836
FBgn0030234	10	0.1199	0.28271	0.982236	163	4	-0.39013	0.045603	0.14156	0.870242	99	2	-0.39013
FBgn0036271	10	0.12093	0.28439	0.982236	164	3	-0.22169	0.9655	0.96622	0.996536	628	0	-0.22169
FBgn0015586	10	0.12198	0.28627	0.982236	165	3	-0.20255	0.38882	0.59896	0.996536	370	3	-0.20255
FBgn0028427	10	0.12269	0.28761	0.982236	166	4	-0.36319	0.19703	0.40062	0.99178	255	3	-0.36319
FBgn0267487	10	0.12329	0.28868	0.982236	167	2	-0.86715	0.97117	0.97179	0.996536	631	0	-0.86715
FBgn0037081	10	0.12426	0.29029	0.982236	168	1	0.15613	0.33056	0.53868	0.996536	337	3	0.15613
FBgn0003091	10	0.12438	0.29049	0.982236	169	4	-0.29654	0.070285	0.19556	0.881891	141	2	-0.29654
FBgn0026417	10	0.12699	0.29522	0.982236	170	3	-0.17468	0.46084	0.6539	0.996536	402	1	-0.17468
FBgn0034964	10	0.12845	0.29778	0.982236	171	1	0.062406	0.051939	0.1571	0.870242	112	5	0.062406
FBgn0036165	9	0.12851	0.29224	0.982236	172	2	-0.16214	0.15823	0.33171	0.99178	221	3	-0.16214
FBgn0034029	10	0.12939	0.29931	0.982236	173	3	0.081578	0.0033656	0.016381	0.808065	13	5	0.081578
FBgn0014427	10	0.1298	0.3	0.982236	174	4	-0.076855	0.028856	0.09667	0.859828	72	3	-0.076855
FBgn0003132	10	0.13002	0.30039	0.982236	175	3	0.004118	0.04847	0.14849	0.870242	106	5	0.004118
FBgn0034650	10	0.13124	0.30247	0.982236	176	3	-0.11128	0.40525	0.61568	0.996536	379	3	-0.11128
FBgn0261854	8	0.13307	0.28379	0.982236	177	3	-0.23209	0.87157	0.871	0.996536	571	1	-0.23209
FBgn0259166	9	0.13529	0.30433	0.982236	178	3	-1.0875	0.99773	0.99749	0.997492	652	0	-1.0875
FBgn0026379	10	0.1353	0.30942	0.982236	179	2	0.092227	0.092436	0.23498	0.941535	161	4	0.092227
FBgn0039623	10	0.13746	0.31289	0.982236	180	3	-0.31201	0.018006	0.067074	0.843779	43	2	-0.31201
FBgn0026323	10	0.13817	0.3139	0.982236	181	3	-1.0875	0.91051	0.91303	0.996536	592	1	-1.0875
FBgn0020440	10	0.1391	0.31552	0.982236	182	2	-1.0875	0.16405	0.35598	0.99178	231	2	-1.0875
FBgn0085447	10	0.13955	0.3162	0.982236	183	1	-0.1989	0.36419	0.57319	0.996536	350	3	-0.1989
FBgn0033569	10	0.14073	0.318	0.982236	184	3	-0.0034357	0.90906	0.91188	0.996536	591	1	-0.0034357
FBgn0028978	10	0.14092	0.31829	0.982236	185	3	-0.11062	0.33295	0.54126	0.996536	339	3	-0.11062
FBgn0034173	10	0.14128	0.31887	0.982236	186	2	-0.18464	0.58867	0.73439	0.996536	453	1	-0.18464
FBgn0030559	10	0.1423	0.32054	0.982236	187	1	-0.26176	0.18829	0.39158	0.99178	250	2	-0.26176
FBgn0050424	5	0.14291	0.25072	0.982236	188	2	-0.22179	0.95327	0.95284	0.996536	620	0	-0.22179
FBgn0042693	10	0.14309	0.3217	0.982236	189	4	-1.0166	0.63189	0.76384	0.996536	476	1	-1.0166
FBgn0035823	10	0.14347	0.32238	0.982236	190	2	-0.0092662	0.42117	0.63129	0.996536	387	3	-0.0092662
FBgn0002413	10	0.14505	0.32492	0.982236	191	2	-0.095402	0.012474	0.050638	0.843779	31	3	-0.095402
FBgn0053100	10	0.14622	0.32677	0.982236	192	2	-0.12237	0.1418	0.31936	0.99178	208	4	-0.12237
FBgn0035983	10	0.14644	0.32713	0.982236	193	4	-0.28664	0.91473	0.91626	0.996536	595	1	-0.28664
FBgn0085459	10	0.14798	0.3297	0.982236	194	4	-0.48433	0.69224	0.80752	0.996536	509	2	-0.48433
FBgn0039044	10	0.15065	0.33401	0.982236	195	3	-0.325	0.25831	0.46467	0.99178	298	3	-0.325
FBgn0036323	8	0.1523	0.30963	0.982236	196	1	-0.46868	0.27344	0.46459	0.99178	312	2	-0.46868
FBgn0039532	10	0.15324	0.33834	0.982236	197	2	-0.029524	0.036482	0.11741	0.870242	84	2	-0.029524
FBgn0040368	10	0.15455	0.34059	0.982236	198	3	0.17596	0.070285	0.19556	0.881891	142	3	0.17596
FBgn0014141	10	0.15511	0.3413	0.982236	199	3	-0.14789	0.019292	0.070547	0.843779	49	3	-0.14789
FBgn0027794	10	0.15595	0.34272	0.982236	200	2	-0.27265	0.53087	0.69683	0.996536	427	2	-0.27265
FBgn0030840	10	0.1573	0.3447	0.982236	201	2	-0.15764	0.11084	0.26703	0.967198	177	3	-0.15764
FBgn0037538	10	0.15866	0.34706	0.982236	202	2	-0.064243	0.15231	0.33673	0.99178	215	2	-0.064243
FBgn0015295	10	0.16001	0.34933	0.982236	203	1	-0.013899	0.74425	0.83318	0.996536	532	1	-0.013899
FBgn0283442	10	0.16135	0.35159	0.982236	204	2	-0.66698	0.901	0.9058	0.996536	589	1	-0.66698
FBgn0023197	10	0.1618	0.35228	0.982236	205	3	-0.34061	0.8097	0.85695	0.996536	550	1	-0.34061
FBgn0038167	10	0.1627	0.35363	0.982236	206	3	-1.061	0.91911	0.91996	0.996536	596	1	-1.061
FBgn0033315	10	0.16405	0.35613	0.982236	207	3	-0.37803	0.44623	0.64575	0.996536	396	2	-0.37803
FBgn0042712	10	0.16537	0.35812	0.982236	208	3	-0.23638	0.12005	0.28241	0.984664	184	2	-0.23638
FBgn0014859	10	0.16582	0.3588	0.982236	209	2	-0.61399	0.043059	0.1347	0.870242	95	3	-0.61399
FBgn0032042	10	0.16673	0.36031	0.982236	210	1	0.16094	0.019834	0.072111	0.843779	53	4	0.16094
FBgn0035709	10	0.16807	0.36232	0.982236	211	3	-0.28945	0.50444	0.68035	0.996536	418	1	-0.28945
FBgn0001179	10	0.16936	0.36428	0.982236	212	3	-0.64438	0.16696	0.36049	0.99178	234	3	-0.64438
FBgn0266667	10	0.1694	0.36434	0.982236	213	1	-1.0875	0.12566	0.29252	0.989508	191	2	-1.0875
FBgn0025626	10	0.17074	0.36642	0.982236	214	1	-0.01978	0.32687	0.53498	0.996536	335	2	-0.01978
FBgn0036489	4	0.17094	0.26974	0.982236	215	2	-0.89195	0.37309	0.43054	0.99178	358	1	-0.89195
FBgn0036717	10	0.17606	0.37444	0.982236	216	2	-0.071671	0.32427	0.53238	0.996536	334	1	-0.071671
FBgn0052568	10	0.17643	0.37495	0.982236	217	3	-0.41887	0.0915	0.23329	0.941535	157	3	-0.41887
FBgn0050428	10	0.17745	0.37664	0.982236	218	3	-0.59273	0.99002	0.99049	0.996536	647	0	-0.59273
FBgn0267698	10	0.17871	0.37852	0.982236	219	3	-0.20896	0.33144	0.53953	0.996536	338	1	-0.20896
FBgn0035483	10	0.18016	0.38076	0.982236	220	2	0.36338	0.020087	0.072853	0.843779	54	5	0.36338
FBgn0037657	10	0.18196	0.38341	0.982236	221	3	-1.0875	0.53936	0.70189	0.996536	430	1	-1.0875
FBgn0028717	10	0.18247	0.38428	0.982236	222	3	-0.76566	0.88995	0.8983	0.996536	581	1	-0.76566
FBgn0019940	10	0.18332	0.38555	0.982236	223	3	-0.098948	0.16004	0.3492	0.99178	223	4	-0.098948
FBgn0040391	10	0.18332	0.38555	0.982236	224	2	-0.015638	0.23048	0.43576	0.99178	275	2	-0.015638
FBgn0262103	10	0.18526	0.38868	0.982236	225	3	-0.24832	0.19313	0.39661	0.99178	252	3	-0.24832
FBgn0037074	10	0.18529	0.38869	0.982236	226	1	-0.068006	0.0039393	0.018736	0.814409	14	2	-0.068006
FBgn0032519	10	0.18654	0.39077	0.982236	227	3	-0.24538	0.16639	0.35962	0.99178	233	2	-0.24538
FBgn0283536	10	0.18942	0.39509	0.982236	228	3	-0.89304	0.36421	0.57319	0.996536	351	1	-0.89304
FBgn0028530	10	0.19026	0.39586	0.982236	229	3	-0.69893	0.60057	0.74246	0.996536	461	2	-0.69893
FBgn0050495	10	0.19319	0.3988	0.982236	230	3	-0.10299	0.13678	0.31134	0.99178	203	2	-0.10299
FBgn0000036	10	0.19614	0.4017	0.982236	231	3	0.023917	0.12241	0.28654	0.988479	186	4	0.023917
FBgn0262081	10	0.19768	0.40327	0.982236	232	1	-0.64815	0.5186	0.68913	0.996536	422	2	-0.64815
FBgn0035769	10	0.19847	0.40418	0.982236	233	3	-0.21904	0.98577	0.98654	0.996536	643	0	-0.21904
FBgn0028988	10	0.19885	0.40461	0.982236	234	2	-0.088138	0.25779	0.46405	0.99178	296	3	-0.088138
FBgn0000229	10	0.20003	0.40581	0.982236	235	3	-0.12871	0.24895	0.45486	0.99178	292	3	-0.12871
FBgn0037678	10	0.20298	0.40896	0.982236	236	2	0.033563	0.24554	0.45136	0.99178	287	2	0.033563
FBgn0031040	10	0.20357	0.40963	0.982236	237	3	-0.77742	0.94	0.9405	0.996536	608	0	-0.77742
FBgn0000711	10	0.20417	0.41034	0.982236	238	3	-0.17504	0.68909	0.80512	0.996536	507	2	-0.17504
FBgn0053169	10	0.20464	0.41092	0.982236	239	3	-0.3551	0.69074	0.80634	0.996536	508	1	-0.3551
FBgn0032223	10	0.20507	0.41121	0.982236	240	3	-0.20752	0.3172	0.52497	0.996536	331	3	-0.20752
FBgn0011754	10	0.20535	0.41146	0.982236	241	2	-0.9253	0.94204	0.9428	0.996536	611	0	-0.9253
FBgn0029893	10	0.20654	0.41261	0.982236	242	2	-0.60284	0.13401	0.30691	0.99178	200	3	-0.60284
FBgn0014135	10	0.20713	0.41323	0.982236	243	3	-0.16089	0.56052	0.71526	0.996536	439	1	-0.16089
FBgn0086442	10	0.20862	0.41492	0.982236	244	3	-0.38597	0.68549	0.80239	0.996536	503	1	-0.38597
FBgn0259977	10	0.21053	0.41709	0.982236	245	2	-0.19222	0.36178	0.57087	0.996536	348	3	-0.19222
FBgn0003499	10	0.21368	0.42044	0.982236	246	3	-0.29193	0.18003	0.38057	0.99178	240	2	-0.29193
FBgn0050476	10	0.2137	0.42047	0.982236	247	3	-0.2249	0.70685	0.81831	0.996536	517	2	-0.2249
FBgn0031441	10	0.21413	0.42092	0.982236	248	3	-0.098354	0.78297	0.84638	0.996536	543	1	-0.098354
FBgn0033086	10	0.21625	0.42313	0.982236	249	2	-0.04381	0.047007	0.14506	0.870242	101	4	-0.04381
FBgn0024811	10	0.21718	0.42416	0.982236	250	3	-0.85754	0.65618	0.78096	0.996536	490	2	-0.85754
FBgn0260935	10	0.21879	0.42576	0.982236	251	2	-1.0875	0.93424	0.93454	0.996536	603	0	-1.0875
FBgn0003448	10	0.21906	0.42598	0.982236	252	2	0.26831	0.018606	0.068558	0.843779	45	5	0.26831
FBgn0029870	10	0.2198	0.42661	0.982236	253	3	-0.85771	0.5971	0.7401	0.996536	460	1	-0.85771
FBgn0011826	10	0.22131	0.4281	0.982236	254	2	-0.032591	0.039308	0.12499	0.870242	87	3	-0.032591
FBgn0037248	10	0.22383	0.43082	0.982236	255	2	-1.0875	0.33418	0.54277	0.996536	340	1	-1.0875
FBgn0033860	10	0.22385	0.43087	0.982236	256	2	-0.68993	0.26849	0.47459	0.99178	309	1	-0.68993
FBgn0039710	10	0.22463	0.43155	0.982236	257	3	-0.3853	0.24063	0.44631	0.99178	284	3	-0.3853
FBgn0039941	10	0.22617	0.43314	0.982236	258	3	0.15193	0.20003	0.40377	0.99178	258	2	0.15193
FBgn0035887	10	0.22617	0.43314	0.982236	259	3	-0.018812	0.18817	0.39146	0.99178	249	3	-0.018812
FBgn0264959	10	0.22626	0.4332	0.982236	260	3	-0.29407	0.88621	0.89571	0.996536	575	1	-0.29407
FBgn0037606	10	0.22683	0.43366	0.982236	261	3	-0.42696	0.2583	0.46466	0.99178	297	2	-0.42696
FBgn0039064	10	0.22838	0.43528	0.982236	262	3	-0.35242	0.58332	0.73114	0.996536	449	2	-0.35242
FBgn0050020	10	0.22867	0.43555	0.982236	263	2	-0.13904	0.8798	0.89193	0.996536	573	1	-0.13904
FBgn0011474	10	0.23133	0.43838	0.982236	264	2	-0.26128	0.73316	0.8297	0.996536	527	1	-0.26128
FBgn0031194	10	0.23258	0.43964	0.982236	265	3	-0.7798	0.25951	0.46583	0.99178	300	2	-0.7798
FBgn0034350	9	0.23361	0.42047	0.982236	266	2	-0.12246	0.29829	0.49535	0.995113	327	2	-0.12246
FBgn0033917	10	0.2341	0.44131	0.982236	267	2	-0.096946	0.23885	0.4445	0.99178	283	3	-0.096946
FBgn0030850	10	0.23591	0.44325	0.982236	268	2	-0.7374	0.98588	0.98663	0.996536	644	0	-0.7374
FBgn0027342	10	0.23591	0.44325	0.982236	269	3	0.066456	0.41683	0.62695	0.996536	385	3	0.066456
FBgn0051624	7	0.23674	0.40564	0.982236	270	2	-0.47304	0.62843	0.69928	0.996536	474	1	-0.47304
FBgn0030539	10	0.23728	0.44454	0.982236	271	3	0.17071	0.15356	0.33876	0.99178	216	4	0.17071
FBgn0034700	10	0.23974	0.44715	0.982236	272	3	-0.41785	0.29946	0.50671	0.995113	328	1	-0.41785
FBgn0010389	10	0.24001	0.44735	0.982236	273	1	-0.02163	0.16242	0.35305	0.99178	228	2	-0.02163
FBgn0000382	10	0.24199	0.44927	0.982236	274	3	-0.056694	0.011767	0.048184	0.843779	27	4	-0.056694
FBgn0038485	10	0.24288	0.4502	0.982236	275	3	-0.099732	0.67411	0.7938	0.996536	497	2	-0.099732
FBgn0004463	10	0.24334	0.45075	0.982236	276	3	0.022817	0.066417	0.18898	0.881891	136	4	0.022817
FBgn0038279	10	0.2437	0.45107	0.982236	277	2	-0.17842	0.14642	0.32681	0.99178	212	1	-0.17842
FBgn0025469	10	0.24469	0.45209	0.982236	278	3	-0.43234	0.57338	0.7241	0.996536	444	2	-0.43234
FBgn0030674	5	0.2452	0.36757	0.982236	279	2	-1.0875	0.71254	0.71355	0.996536	523	1	-1.0875
FBgn0259190	10	0.24554	0.45298	0.982236	280	1	0.21803	0.028822	0.096611	0.859828	70	5	0.21803
FBgn0019890	10	0.24622	0.45374	0.982236	281	2	-0.84661	0.71201	0.82241	0.996536	522	1	-0.84661
FBgn0035995	10	0.24808	0.45576	0.982236	282	3	-0.44842	0.11728	0.27744	0.972546	183	2	-0.44842
FBgn0017561	10	0.24926	0.45682	0.982236	283	2	-0.55517	0.95396	0.95445	0.996536	621	0	-0.55517
FBgn0263782	8	0.25065	0.43613	0.982236	284	2	-0.035729	0.034817	0.10239	0.866988	80	3	-0.035729
FBgn0032664	10	0.25139	0.45905	0.982236	285	3	-0.15467	0.84588	0.87322	0.996536	564	1	-0.15467
FBgn0030679	10	0.25225	0.45993	0.982236	286	1	-1.0875	0.92421	0.9245	0.996536	598	1	-1.0875
FBgn0029067	10	0.25649	0.46431	0.982236	287	2	-0.029452	0.022818	0.080709	0.843779	61	4	-0.029452
FBgn0001217	10	0.25657	0.46439	0.982236	288	2	-0.56902	0.10158	0.25119	0.94669	173	1	-0.56902
FBgn0264357	10	0.25657	0.46439	0.982236	289	2	-0.0056896	0.0018963	0.010108	0.808065	8	4	-0.0056896
FBgn0037688	10	0.26083	0.4686	0.982236	290	3	-0.14898	0.88666	0.89602	0.996536	576	1	-0.14898
FBgn0259168	10	0.26146	0.46926	0.982236	291	2	0.063393	0.3852	0.59517	0.996536	368	3	0.063393
FBgn0030956	10	0.26451	0.47216	0.982236	292	2	-0.92169	0.828	0.86524	0.996536	556	1	-0.92169
FBgn0083961	10	0.26635	0.47385	0.982236	293	2	0.073384	0.034955	0.11311	0.870242	81	3	0.073384
FBgn0270928	10	0.26635	0.47385	0.982236	294	2	-0.0011354	0.5268	0.6943	0.996536	425	2	-0.0011354
FBgn0004118	10	0.26888	0.47639	0.982236	295	3	-0.28063	0.95246	0.9529	0.996536	619	0	-0.28063
FBgn0035059	10	0.27384	0.48139	0.982236	296	1	0.098247	0.091714	0.23366	0.941535	158	4	0.098247
FBgn0050268	10	0.27561	0.48319	0.982236	297	1	-0.24037	0.12858	0.29761	0.99178	195	4	-0.24037
FBgn0025807	10	0.27651	0.48413	0.982236	298	3	-1.0331	0.99709	0.99721	0.997492	651	0	-1.0331
FBgn0037679	10	0.27856	0.48604	0.982236	299	1	-0.03067	0.68783	0.80413	0.996536	506	2	-0.03067
FBgn0033020	5	0.28343	0.41137	0.982236	300	1	-1.0875	0.65785	0.66636	0.996536	491	1	-1.0875
FBgn0030425	10	0.28382	0.49142	0.982236	301	2	0.20728	0.041083	0.12936	0.870242	93	5	0.20728
FBgn0261560	10	0.28442	0.49196	0.982236	302	2	-0.11959	0.51365	0.68599	0.996536	419	2	-0.11959
FBgn0017572	10	0.28513	0.49267	0.982236	303	3	-0.31869	0.92695	0.92715	0.996536	601	1	-0.31869
FBgn0000038	10	0.28536	0.4929	0.982236	304	2	0.19074	0.05247	0.15836	0.870242	114	3	0.19074
FBgn0083141	10	0.28559	0.49324	0.982236	305	3	-0.13411	0.29638	0.50357	0.995113	325	3	-0.13411
FBgn0037714	10	0.28675	0.49447	0.982236	306	2	-0.16637	0.7063	0.81797	0.996536	516	1	-0.16637
FBgn0037504	10	0.287	0.49474	0.982236	307	3	-0.41506	0.393	0.60325	0.996536	374	1	-0.41506
FBgn0030761	10	0.287	0.49474	0.982236	308	3	-0.059589	0.056653	0.16933	0.877752	125	3	-0.059589
FBgn0260768	10	0.2885	0.49634	0.982236	309	1	-0.8232	0.9446	0.94531	0.996536	613	0	-0.8232
FBgn0033500	10	0.28934	0.49716	0.982236	310	3	-0.17306	0.72905	0.82836	0.996536	526	1	-0.17306
FBgn0039049	10	0.29098	0.49903	0.982236	311	3	-0.88543	0.66578	0.78772	0.996536	493	2	-0.88543
FBgn0039188	10	0.29215	0.50017	0.982236	312	3	-0.74333	0.13124	0.30205	0.99178	197	1	-0.74333
FBgn0000326	10	0.29396	0.50213	0.982236	313	2	0.19647	0.068636	0.19273	0.881891	140	4	0.19647
FBgn0023213	10	0.29601	0.50439	0.982236	314	2	-1.0875	0.17407	0.37135	0.99178	238	1	-1.0875
FBgn0015296	10	0.29612	0.50454	0.982236	315	2	0.018942	0.52788	0.69497	0.996536	426	2	0.018942
FBgn0000289	10	0.30003	0.50847	0.982236	316	1	-0.66576	0.88798	0.89698	0.996536	578	1	-0.66576
FBgn0034730	10	0.30175	0.51002	0.982236	317	3	-0.38847	0.29255	0.4995	0.995113	323	2	-0.38847
FBgn0052451	10	0.30274	0.51101	0.982236	318	3	0.011512	0.046566	0.14391	0.870242	100	3	0.011512
FBgn0052333	10	0.30288	0.51108	0.982236	319	3	-0.73018	0.70839	0.81956	0.996536	520	1	-0.73018
FBgn0031042	10	0.30442	0.51271	0.982236	320	2	0.059827	0.38286	0.59255	0.996536	366	2	0.059827
FBgn0032235	10	0.30487	0.51314	0.982236	321	3	-0.35325	0.89851	0.90416	0.996536	587	1	-0.35325
FBgn0039241	10	0.30818	0.51629	0.982236	322	3	-0.21957	0.79654	0.85171	0.996536	546	1	-0.21957
FBgn0030716	10	0.30842	0.51655	0.982236	323	2	-0.55483	0.065098	0.18671	0.881891	132	3	-0.55483
FBgn0030332	10	0.31103	0.51938	0.982236	324	3	0.080989	0.15482	0.34067	0.99178	217	4	0.080989
FBgn0265268	10	0.31119	0.51947	0.982236	325	2	-0.39034	0.59467	0.73859	0.996536	456	2	-0.39034
FBgn0030686	10	0.3115	0.51974	0.982236	326	3	-0.16015	0.23319	0.43865	0.99178	276	2	-0.16015
FBgn0263600	10	0.31197	0.52015	0.982236	327	3	-0.37658	0.0242	0.084519	0.847792	64	1	-0.37658
FBgn0037516	10	0.31211	0.52028	0.982236	328	2	-0.37979	0.21248	0.4173	0.99178	267	3	-0.37979
FBgn0032763	10	0.3134	0.52177	0.982236	329	3	0.18377	0.052167	0.15756	0.870242	113	4	0.18377
FBgn0033913	10	0.31365	0.52215	0.982236	330	1	-0.81361	0.37609	0.58517	0.996536	360	2	-0.81361
FBgn0020412	10	0.31482	0.52334	0.982236	331	3	-0.1907	0.26243	0.46876	0.99178	302	3	-0.1907
FBgn0031006	2	0.317	0.32099	0.982236	332	1	-0.030054	0.37793	0.37736	0.99178	363	1	-0.030054
FBgn0039747	10	0.31758	0.52631	0.982236	333	2	0.040128	0.2571	0.46331	0.99178	294	1	0.040128
FBgn0037592	10	0.31815	0.52698	0.982236	334	3	-0.22043	0.95849	0.95904	0.996536	625	0	-0.22043
FBgn0260646	10	0.31981	0.52852	0.982236	335	1	0.050705	0.066417	0.18898	0.881891	135	4	0.050705
FBgn0024740	10	0.32204	0.53097	0.982236	336	2	0.035568	0.050844	0.15431	0.870242	109	3	0.035568
FBgn0042710	10	0.32626	0.53519	0.982236	337	3	0.033306	0.78217	0.846	0.996536	542	1	0.033306
FBgn0036096	10	0.32648	0.53546	0.982236	338	2	-0.16539	0.91439	0.91601	0.996536	594	1	-0.16539
FBgn0037653	10	0.32673	0.5357	0.982236	339	3	-0.089812	0.48738	0.66952	0.996536	410	2	-0.089812
FBgn0030342	10	0.32769	0.53671	0.982236	340	3	-0.1449	0.16101	0.35071	0.99178	226	3	-0.1449
FBgn0033685	10	0.32963	0.53857	0.982236	341	2	-0.19829	0.00078899	0.0043588	0.710484	4	3	-0.19829
FBgn0038876	10	0.33089	0.53981	0.982236	342	2	0.23252	0.010995	0.045522	0.843779	25	4	0.23252
FBgn0050046	10	0.33103	0.53997	0.982236	343	3	-0.085342	0.93665	0.93712	0.996536	605	0	-0.085342
FBgn0040871	10	0.33148	0.54037	0.982236	344	2	-0.18262	0.059047	0.1753	0.881891	127	5	-0.18262
FBgn0267912	10	0.33199	0.54091	0.982236	345	1	-0.12762	0.65919	0.78305	0.996536	492	1	-0.12762
FBgn0003134	10	0.33309	0.54218	0.982236	346	2	-1.0875	0.98173	0.9822	0.996536	641	0	-1.0875
FBgn0031126	10	0.33332	0.54257	0.982236	347	2	-0.40675	0.68123	0.79922	0.996536	502	2	-0.40675
FBgn0030293	10	0.33534	0.54485	0.982236	348	3	-0.075032	0.24514	0.45099	0.99178	286	3	-0.075032
FBgn0031869	10	0.33582	0.54547	0.982236	349	3	-0.39967	0.59009	0.73541	0.996536	454	1	-0.39967
FBgn0266721	10	0.33746	0.54709	0.982236	350	2	-0.2714	0.70968	0.82056	0.996536	521	2	-0.2714
FBgn0033095	10	0.33854	0.54806	0.982236	351	2	0.07176	0.3852	0.59517	0.996536	367	3	0.07176
FBgn0003719	10	0.33966	0.54918	0.982236	352	3	0.0069433	0.6855	0.8024	0.996536	504	2	0.0069433
FBgn0030018	8	0.33988	0.51801	0.982236	353	2	-0.054804	0.79502	0.81282	0.996536	545	1	-0.054804
FBgn0046692	10	0.34451	0.55395	0.982236	354	2	0.088065	0.37256	0.58169	0.996536	357	2	0.088065
FBgn0031187	10	0.34451	0.55395	0.982236	355	2	-0.30639	0.14274	0.32088	0.99178	210	3	-0.30639
FBgn0040370	10	0.34497	0.55454	0.982236	356	2	0.0017121	0.20421	0.40838	0.99178	263	3	0.0017121
FBgn0044826	10	0.34497	0.55454	0.982236	357	3	-1.0166	0.70564	0.81755	0.996536	515	2	-1.0166
FBgn0033574	10	0.3483	0.55806	0.982236	358	3	-0.24123	0.5006	0.6779	0.996536	417	2	-0.24123
FBgn0030518	10	0.35215	0.56204	0.982236	359	3	-0.228	0.47057	0.65944	0.996536	405	2	-0.228
FBgn0033113	10	0.35324	0.56308	0.982236	360	2	-0.17139	0.3695	0.57845	0.996536	355	3	-0.17139
FBgn0052105	10	0.35889	0.56864	0.982236	361	3	0.070885	0.67193	0.79216	0.996536	495	2	0.070885
FBgn0004895	10	0.35904	0.5688	0.982236	362	2	-0.024664	0.52462	0.69296	0.996536	424	2	-0.024664
FBgn0036480	7	0.35979	0.51245	0.982236	363	2	-1.0875	0.83449	0.83441	0.996536	558	1	-1.0875
FBgn0023169	10	0.36026	0.56981	0.982236	364	2	-0.35911	0.80138	0.85358	0.996536	547	1	-0.35911
FBgn0036876	10	0.3613	0.57081	0.982236	365	3	0.1404	0.078158	0.2099	0.912366	149	4	0.1404
FBgn0032749	10	0.36299	0.57242	0.982236	366	3	-0.34762	0.83855	0.86977	0.996536	560	1	-0.34762
FBgn0033889	10	0.3654	0.57499	0.982236	367	3	-0.25404	0.68744	0.80384	0.996536	505	1	-0.25404
FBgn0003140	10	0.3654	0.57499	0.982236	368	3	-0.51956	0.79082	0.84945	0.996536	544	1	-0.51956
FBgn0036970	10	0.36697	0.57652	0.982236	369	2	-0.17191	0.015177	0.05898	0.843779	36	2	-0.17191
FBgn0015300	10	0.36819	0.57768	0.982236	370	2	-0.35283	0.019557	0.071309	0.843779	51	2	-0.35283
FBgn0086384	9	0.36857	0.56821	0.982236	371	2	-0.8411	0.10113	0.24369	0.941535	172	3	-0.8411
FBgn0051852	10	0.37275	0.58229	0.982236	372	2	-0.61258	0.025743	0.088517	0.859828	66	2	-0.61258
FBgn0032372	10	0.37427	0.58384	0.982236	373	2	-0.15129	0.9265	0.9266	0.996536	600	1	-0.15129
FBgn0030507	10	0.38183	0.59182	0.982236	374	1	0.033984	0.93678	0.93727	0.996536	606	0	0.033984
FBgn0040001	10	0.38337	0.59341	0.982236	375	2	-0.017801	0.20734	0.41142	0.99178	265	3	-0.017801
FBgn0027356	8	0.38478	0.55145	0.982236	376	2	-0.21564	0.8978	0.89758	0.996536	585	0	-0.21564
FBgn0266064	10	0.3849	0.59515	0.982236	377	2	-0.56332	0.39462	0.60479	0.996536	375	3	-0.56332
FBgn0050293	10	0.38592	0.5962	0.982236	378	2	-0.038365	0.64856	0.7756	0.996536	482	1	-0.038365
FBgn0002774	10	0.38911	0.59956	0.982236	379	2	-0.58216	0.0070807	0.030977	0.843779	18	2	-0.58216
FBgn0003483	10	0.392	0.60258	0.982236	380	1	-0.050651	0.67788	0.79677	0.996536	499	1	-0.050651
FBgn0039622	10	0.39243	0.60298	0.982236	381	2	0.058678	0.021801	0.077919	0.843779	58	4	0.058678
FBgn0030530	8	0.39809	0.56207	0.982236	382	1	-0.23113	0.88061	0.87969	0.996536	574	0	-0.23113
FBgn0053554	10	0.40101	0.61159	0.982236	383	1	-0.2741	0.42058	0.63069	0.996536	386	2	-0.2741
FBgn0034491	10	0.40201	0.61237	0.982236	384	2	-0.20905	0.19151	0.39493	0.99178	251	3	-0.20905
FBgn0031195	10	0.40399	0.61448	0.982236	385	1	0.071874	0.28233	0.48845	0.992496	318	3	0.071874
FBgn0032934	10	0.40805	0.61853	0.982236	386	2	-0.12791	0.54793	0.7073	0.996536	434	1	-0.12791
FBgn0260945	10	0.40985	0.62037	0.982236	387	2	-0.45339	0.44246	0.64328	0.996536	395	2	-0.45339
FBgn0024248	8	0.41092	0.57214	0.982236	388	1	-0.18312	0.12371	0.27	0.967198	188	3	-0.18312
FBgn0037855	10	0.41578	0.62618	0.982236	389	2	0.11917	0.028944	0.096848	0.859828	73	5	0.11917
FBgn0024846	10	0.42266	0.63282	0.982236	390	2	-0.22319	0.0055111	0.02504	0.843779	17	2	-0.22319
FBgn0015279	9	0.42562	0.6049	0.982236	391	2	-0.71245	0.98053	0.97931	0.996536	639	0	-0.71245
FBgn0037536	10	0.42681	0.63674	0.982236	392	2	-0.35585	0.77772	0.84452	0.996536	540	1	-0.35585
FBgn0037672	10	0.43021	0.63874	0.982236	393	2	0.0092515	0.017717	0.066302	0.843779	41	4	0.0092515
FBgn0028563	10	0.43125	0.63928	0.982236	394	2	-0.89346	0.94112	0.94178	0.996536	609	0	-0.89346
FBgn0034567	10	0.43258	0.63992	0.982236	395	2	-0.27328	0.94964	0.94995	0.996536	615	0	-0.27328
FBgn0015582	9	0.43801	0.61291	0.982236	396	2	0.23199	0.020274	0.070112	0.843779	55	5	0.23199
FBgn0003984	10	0.44067	0.64455	0.982236	397	2	0.12077	0.10906	0.26406	0.967198	175	3	0.12077
FBgn0040377	10	0.44106	0.64477	0.982236	398	2	-0.12705	0.011947	0.048758	0.843779	29	5	-0.12705
FBgn0032650	10	0.44106	0.64477	0.982236	399	1	-0.65222	0.28382	0.49016	0.992496	320	2	-0.65222
FBgn0021796	10	0.44301	0.64591	0.982236	400	2	-0.25667	0.98878	0.98934	0.996536	646	0	-0.25667
FBgn0265267	10	0.44479	0.64701	0.982236	401	1	-0.43871	0.89811	0.90383	0.996536	586	1	-0.43871
FBgn0283649	10	0.44479	0.64701	0.982236	402	1	0.136	0.51805	0.6888	0.996536	421	2	0.136
FBgn0034381	10	0.44769	0.64865	0.982236	403	2	0.17946	0.001588	0.0084158	0.783871	7	4	0.17946
FBgn0038258	10	0.44896	0.64929	0.982236	404	1	0.015852	0.49938	0.6768	0.996536	416	2	0.015852
FBgn0020621	10	0.45264	0.65145	0.982236	405	2	0.23333	0.019158	0.070122	0.843779	48	5	0.23333
FBgn0260634	10	0.45497	0.65283	0.982236	406	2	0.15112	0.04356	0.136	0.870242	98	5	0.15112
FBgn0037625	10	0.45585	0.6534	0.982236	407	2	-0.01102	0.90324	0.90746	0.996536	590	1	-0.01102
FBgn0026090	10	0.45721	0.65415	0.982236	408	1	0.079183	0.096723	0.2424	0.941535	167	3	0.079183
FBgn0023512	10	0.45759	0.65428	0.982236	409	2	-0.014912	0.62633	0.75962	0.996536	473	2	-0.014912
FBgn0032187	10	0.46355	0.65759	0.982236	410	1	-0.12681	0.7036	0.81635	0.996536	514	2	-0.12681
FBgn0034996	10	0.46395	0.65787	0.982236	411	2	-0.39982	0.073351	0.20084	0.890783	145	3	-0.39982
FBgn0044047	10	0.46535	0.6587	0.982236	412	2	0.25994	0.047273	0.1457	0.870242	103	4	0.25994
FBgn0038466	10	0.46626	0.65919	0.982236	413	2	-0.67288	0.64266	0.77145	0.996536	481	1	-0.67288
FBgn0036908	10	0.46913	0.66064	0.982236	414	2	-0.15517	0.22566	0.43075	0.99178	273	3	-0.15517
FBgn0010501	10	0.4725	0.66251	0.982236	415	2	-0.1968	0.61045	0.74882	0.996536	466	2	-0.1968
FBgn0036044	10	0.47429	0.66349	0.982236	416	2	-0.0064515	0.15595	0.3425	0.99178	218	2	-0.0064515
FBgn0004050	10	0.47429	0.66349	0.982236	417	2	-0.19921	0.81374	0.85851	0.996536	553	1	-0.19921
FBgn0050156	10	0.47429	0.66349	0.982236	418	2	0.18443	0.09561	0.24046	0.941535	165	3	0.18443
FBgn0033980	10	0.48	0.66721	0.982236	419	2	-0.18683	0.8882	0.89709	0.996536	579	1	-0.18683
FBgn0027570	10	0.48483	0.67003	0.982236	420	2	-0.042471	0.26818	0.4743	0.99178	308	2	-0.042471
FBgn0053121	9	0.48674	0.646	0.982236	421	2	-0.35154	0.97173	0.97062	0.996536	633	0	-0.35154
FBgn0030359	10	0.48681	0.67118	0.982236	422	2	-1.0875	0.44711	0.6462	0.996536	397	1	-1.0875
FBgn0033677	6	0.49	0.59618	0.982236	423	1	-0.35489	0.36221	0.49953	0.995113	349	1	-0.35489
FBgn0030384	10	0.49084	0.67353	0.982236	424	2	-0.18385	0.16338	0.35485	0.99178	229	3	-0.18385
FBgn0015277	10	0.49218	0.67417	0.982236	425	2	-0.58761	0.76042	0.83856	0.996536	535	1	-0.58761
FBgn0051719	6	0.49377	0.59778	0.982236	426	1	-0.33817	0.81302	0.81242	0.996536	552	0	-0.33817
FBgn0029648	10	0.49683	0.67699	0.982236	427	2	-0.77774	0.065747	0.18798	0.881891	133	3	-0.77774
FBgn0035101	10	0.49853	0.67815	0.982236	428	2	-0.35376	0.4725	0.66049	0.996536	406	1	-0.35376
FBgn0035627	10	0.49864	0.67825	0.982236	429	2	-0.14193	0.14008	0.31683	0.99178	207	4	-0.14193
FBgn0263656	10	0.50695	0.68366	0.982236	430	1	-0.091859	0.58613	0.7328	0.996536	451	2	-0.091859
FBgn0039270	10	0.50945	0.68513	0.982236	431	1	-0.13802	0.48869	0.67037	0.996536	411	2	-0.13802
FBgn0029147	10	0.51069	0.68573	0.982236	432	1	-0.010229	0.26431	0.47053	0.99178	305	3	-0.010229
FBgn0038870	10	0.51194	0.68659	0.982236	433	1	0.23443	0.027302	0.092841	0.859828	69	5	0.23443
FBgn0031653	10	0.51227	0.68679	0.982236	434	2	-0.016706	0.06404	0.18471	0.881891	131	2	-0.016706
FBgn0031214	10	0.51276	0.68714	0.982236	435	2	-0.6871	0.068033	0.19191	0.881891	138	3	-0.6871
FBgn0031463	10	0.51475	0.68836	0.982236	436	2	-0.036752	0.26551	0.47164	0.99178	306	2	-0.036752
FBgn0024542	10	0.5186	0.69081	0.982236	437	2	-0.44855	0.31083	0.51822	0.996536	329	1	-0.44855
FBgn0265042	10	0.51997	0.69175	0.982236	438	2	-0.23263	0.0091596	0.038863	0.843779	22	4	-0.23263
FBgn0265137	10	0.52243	0.69324	0.982236	439	2	-0.33448	0.16341	0.35491	0.99178	230	4	-0.33448
FBgn0032381	10	0.52298	0.69355	0.982236	440	2	-0.20427	0.84052	0.87061	0.996536	561	1	-0.20427
FBgn0030035	10	0.52502	0.69492	0.982236	441	1	-0.025767	0.12679	0.29442	0.989508	193	3	-0.025767
FBgn0000464	10	0.52502	0.69492	0.982236	442	1	-1.0875	0.67959	0.79795	0.996536	500	1	-1.0875
FBgn0027620	10	0.5268	0.69592	0.982236	443	2	-0.060706	0.57608	0.72589	0.996536	446	2	-0.060706
FBgn0039782	10	0.5287	0.69701	0.982236	444	2	-0.26873	0.13401	0.30691	0.99178	201	2	-0.26873
FBgn0050094	10	0.5287	0.69701	0.982236	445	2	-0.81844	0.95566	0.95618	0.996536	622	0	-0.81844
FBgn0024222	10	0.53144	0.69876	0.982236	446	1	0.047072	0.12447	0.29021	0.989508	190	4	0.047072
FBgn0010269	10	0.53542	0.70109	0.982236	447	2	-0.076084	0.16044	0.34978	0.99178	224	3	-0.076084
FBgn0264340	10	0.53546	0.7011	0.982236	448	2	-0.1684	0.2829	0.48916	0.992496	319	2	-0.1684
FBgn0031897	10	0.53779	0.70252	0.982236	449	1	0.17131	0.0014466	0.0076539	0.783871	5	5	0.17131
FBgn0030793	10	0.5421	0.70509	0.982236	450	1	0.17608	0.021416	0.07684	0.843779	57	5	0.17608
FBgn0039726	10	0.5421	0.70509	0.982236	451	2	-0.11931	0.53815	0.70114	0.996536	428	2	-0.11931
FBgn0032691	8	0.54223	0.67991	0.982236	452	1	-0.7566	0.98765	0.98762	0.996536	645	0	-0.7566
FBgn0030460	2	0.54344	0.54247	0.982236	453	0	-0.59162	0.72411	0.72393	0.996536	525	0	-0.59162
FBgn0035090	10	0.54377	0.70612	0.982236	454	2	-0.021241	0.23506	0.44064	0.99178	278	2	-0.021241
FBgn0033115	10	0.54561	0.70713	0.982236	455	1	-0.044202	0.16239	0.35303	0.99178	227	3	-0.044202
FBgn0015269	10	0.54561	0.70713	0.982236	456	1	0.023504	0.73316	0.8297	0.996536	528	1	0.023504
FBgn0026179	10	0.54564	0.70714	0.982236	457	2	-0.23357	0.053144	0.16007	0.870242	119	3	-0.23357
FBgn0004507	10	0.54644	0.70769	0.982236	458	2	0.21293	0.023547	0.082837	0.843901	63	5	0.21293
FBgn0039938	10	0.54793	0.70869	0.982236	459	2	-0.066494	0.24554	0.45136	0.99178	289	3	-0.066494
FBgn0050438	10	0.55178	0.71087	0.982236	460	1	-0.69434	0.56094	0.71553	0.996536	440	2	-0.69434
FBgn0264075	9	0.55324	0.69479	0.982236	461	2	-0.73176	0.41424	0.59506	0.996536	383	1	-0.73176
FBgn0020258	10	0.55412	0.71227	0.982236	462	2	-0.15404	0.26635	0.47241	0.99178	307	2	-0.15404
FBgn0001089	10	0.5557	0.71334	0.982236	463	2	0.66467	3.4648e-05	0.00022264	0.145161	1	6	0.66467
FBgn0263235	10	0.55859	0.71529	0.982236	464	2	-0.14223	0.086964	0.22506	0.941535	154	2	-0.14223
FBgn0029840	10	0.56613	0.72029	0.982236	465	1	0.11478	0.047115	0.14536	0.870242	102	3	0.11478
FBgn0021742	10	0.57055	0.72358	0.982236	466	2	0.22872	0.02309	0.081531	0.843779	62	5	0.22872
FBgn0051992	10	0.57055	0.72358	0.982236	467	2	0.19879	0.035088	0.11345	0.870242	82	5	0.19879
FBgn0003028	10	0.57132	0.72399	0.982236	468	1	-0.077055	0.4563	0.65147	0.996536	399	2	-0.077055
FBgn0029979	10	0.57132	0.72399	0.982236	469	1	-0.2096	0.43302	0.63795	0.996536	390	2	-0.2096
FBgn0036274	10	0.57287	0.725	0.982236	470	2	-0.40055	0.43965	0.64171	0.996536	392	1	-0.40055
FBgn0001965	8	0.57434	0.70681	0.982236	471	1	0.052479	0.047597	0.13093	0.870242	104	1	0.052479
FBgn0036659	10	0.57441	0.72593	0.982236	472	2	0.0018991	0.20091	0.4047	0.99178	260	3	0.0018991
FBgn0264574	10	0.5779	0.72812	0.982236	473	1	-0.51319	0.13066	0.30104	0.99178	196	4	-0.51319
FBgn0027492	10	0.57862	0.72855	0.982236	474	1	-1.0875	0.42544	0.63379	0.996536	388	1	-1.0875
FBgn0038890	10	0.58208	0.73135	0.982236	475	2	-0.17845	0.45812	0.65245	0.996536	401	1	-0.17845
FBgn0030505	10	0.58309	0.7321	0.982236	476	2	-0.013216	0.063611	0.18384	0.881891	130	4	-0.013216
FBgn0266084	10	0.58764	0.73483	0.982236	477	2	-0.15772	0.80899	0.85664	0.996536	549	1	-0.15772
FBgn0038017	10	0.59192	0.73773	0.982236	478	2	-0.17004	0.081354	0.21545	0.930293	150	4	-0.17004
FBgn0034715	10	0.59361	0.7389	0.982236	479	2	-0.46906	0.81426	0.85868	0.996536	554	1	-0.46906
FBgn0259189	10	0.59467	0.73962	0.982236	480	2	0.30111	0.015075	0.058653	0.843779	35	5	0.30111
FBgn0030992	10	0.59536	0.74013	0.982236	481	1	-0.053647	0.54936	0.70809	0.996536	436	2	-0.053647
FBgn0034317	10	0.59536	0.74013	0.982236	482	1	-0.17157	0.8498	0.87528	0.996536	566	1	-0.17157
FBgn0086708	10	0.5978	0.74153	0.982236	483	1	-0.049902	0.037524	0.12016	0.870242	85	4	-0.049902
FBgn0015765	10	0.5984	0.74193	0.982236	484	2	-0.7763	0.95132	0.95195	0.996536	617	0	-0.7763
FBgn0014366	10	0.5985	0.74196	0.982236	485	1	0.1392	0.14457	0.32391	0.99178	211	3	0.1392
FBgn0034187	10	0.60433	0.74585	0.982236	486	2	-0.76085	0.62276	0.75724	0.996536	470	2	-0.76085
FBgn0000565	10	0.6047	0.7462	0.982236	487	2	-0.030929	0.03399	0.11067	0.870242	77	4	-0.030929
FBgn0030087	10	0.60539	0.74655	0.982236	488	1	-0.56705	0.056288	0.16848	0.877752	124	4	-0.56705
FBgn0036118	10	0.60703	0.74743	0.982236	489	2	0.052706	0.76475	0.84006	0.996536	537	1	0.052706
FBgn0037140	10	0.60743	0.74773	0.982236	490	1	0.06457	0.04333	0.13538	0.870242	96	4	0.06457
FBgn0001974	5	0.60873	0.63024	0.982236	491	1	-0.19936	0.96541	0.96535	0.996536	627	0	-0.19936
FBgn0039043	10	0.60899	0.74857	0.982236	492	2	-0.27168	0.25718	0.4634	0.99178	295	2	-0.27168
FBgn0004861	10	0.61045	0.74968	0.982236	493	2	0.30852	0.018838	0.069271	0.843779	46	4	0.30852
FBgn0260972	10	0.61216	0.75084	0.982236	494	2	-0.7616	0.62012	0.75546	0.996536	469	2	-0.7616
FBgn0015008	10	0.61418	0.75228	0.982236	495	2	-0.72785	0.20951	0.41394	0.99178	266	2	-0.72785
FBgn0259146	10	0.61964	0.7559	0.982236	496	2	-0.24257	0.20605	0.41023	0.99178	264	2	-0.24257
FBgn0034265	10	0.62737	0.76102	0.982236	497	1	0.25109	0.011905	0.04862	0.843779	28	6	0.25109
FBgn0264078	10	0.62802	0.76157	0.982236	498	2	-0.24569	0.81286	0.85811	0.996536	551	1	-0.24569
FBgn0038705	10	0.632	0.76466	0.982236	499	2	0.025569	0.052933	0.15952	0.870242	117	4	0.025569
FBgn0024754	10	0.63341	0.7658	0.982236	500	2	-0.1862	0.49555	0.67422	0.996536	414	2	-0.1862
FBgn0028397	10	0.63576	0.76733	0.982236	501	2	0.097009	0.065819	0.18811	0.881891	134	4	0.097009
FBgn0063667	10	0.63622	0.7676	0.982236	502	2	-0.097035	0.086964	0.22506	0.941535	153	3	-0.097035
FBgn0039734	10	0.63809	0.76891	0.982236	503	2	-0.040124	0.20336	0.40737	0.99178	262	3	-0.040124
FBgn0016984	10	0.64391	0.77296	0.982236	504	1	0.030408	0.65437	0.77959	0.996536	488	2	0.030408
FBgn0022213	10	0.64549	0.77408	0.982236	505	2	-0.034723	0.24804	0.4541	0.99178	291	2	-0.034723
FBgn0033192	10	0.64595	0.77443	0.982236	506	2	-0.44514	0.15718	0.34432	0.99178	219	4	-0.44514
FBgn0010015	10	0.64641	0.77475	0.982236	507	2	-0.04563	0.58106	0.7295	0.996536	448	2	-0.04563
FBgn0035082	10	0.64687	0.7751	0.982236	508	2	-0.28505	0.10778	0.26191	0.967198	174	4	-0.28505
FBgn0030710	10	0.6487	0.77624	0.982236	509	2	-0.40587	0.45721	0.65202	0.996536	400	2	-0.40587
FBgn0041789	10	0.64979	0.77709	0.982236	510	2	-0.63737	0.71288	0.82322	0.996536	524	2	-0.63737
FBgn0032717	10	0.65006	0.77724	0.982236	511	2	-0.34405	0.65006	0.77668	0.996536	485	2	-0.34405
FBgn0030623	10	0.65143	0.77805	0.982236	512	2	0.022191	0.35042	0.55971	0.996536	344	3	0.022191
FBgn0035604	10	0.65708	0.78207	0.982236	513	2	0.0025655	0.15983	0.34885	0.99178	222	3	0.0025655
FBgn0039796	10	0.65799	0.7827	0.982236	514	1	-0.16426	0.35937	0.56854	0.996536	347	3	-0.16426
FBgn0028902	10	0.65859	0.78307	0.982236	515	1	-0.22574	0.3767	0.58603	0.996536	361	2	-0.22574
FBgn0039421	10	0.65919	0.78355	0.982236	516	1	0.064494	0.55859	0.71396	0.996536	438	2	0.064494
FBgn0036156	10	0.65955	0.7838	0.982236	517	2	-0.087992	0.6124	0.75015	0.996536	467	2	-0.087992
FBgn0038830	10	0.6669	0.78892	0.982236	518	1	-0.32937	0.076916	0.20715	0.906452	148	3	-0.32937
FBgn0037579	10	0.66924	0.79056	0.982236	519	1	-0.071769	0.43125	0.63691	0.996536	389	2	-0.071769
FBgn0005592	10	0.67069	0.79159	0.982236	520	1	-0.15583	0.64134	0.77043	0.996536	479	2	-0.15583
FBgn0039115	10	0.6733	0.79355	0.982236	521	1	0.11923	0.017775	0.06649	0.843779	42	5	0.11923
FBgn0036039	10	0.67503	0.79479	0.982236	522	1	-0.14427	0.41538	0.62572	0.996536	384	3	-0.14427
FBgn0036206	10	0.68072	0.79916	0.982236	523	1	-0.18405	0.34828	0.55741	0.996536	343	2	-0.18405
FBgn0029672	8	0.68716	0.75902	0.982236	524	1	0.26841	0.019156	0.065699	0.843779	47	5	0.26841
FBgn0039650	10	0.69754	0.81169	0.982236	525	1	0.01238	0.053648	0.16169	0.871261	121	3	0.01238
FBgn0032499	10	0.70102	0.81442	0.982236	526	1	-0.30091	0.62932	0.7617	0.996536	475	2	-0.30091
FBgn0004657	10	0.70446	0.81694	0.982236	527	1	-0.28641	0.67703	0.79612	0.996536	498	1	-0.28641
FBgn0037039	10	0.70578	0.81772	0.982236	528	1	-0.18391	0.18392	0.38662	0.99178	244	2	-0.18391
FBgn0000273	10	0.71098	0.82167	0.982236	529	1	0.068123	0.013349	0.053815	0.843779	34	4	0.068123
FBgn0020660	8	0.73063	0.77822	0.982236	530	1	-0.16059	0.033326	0.098907	0.859828	76	3	-0.16059
FBgn0024698	9	0.73189	0.80244	0.982236	531	1	-0.27398	0.52153	0.66935	0.996536	423	2	-0.27398
FBgn0051199	10	0.73268	0.83175	0.982236	532	1	-0.96839	0.0886	0.2279	0.941535	156	1	-0.96839
FBgn0027083	10	0.7334	0.83193	0.982236	533	1	0.023005	0.65071	0.77707	0.996536	486	1	0.023005
FBgn0027779	10	0.73484	0.83243	0.982236	534	1	-0.18607	0.23652	0.44211	0.99178	281	2	-0.18607
FBgn0003892	10	0.74029	0.834	0.982236	535	1	0.019243	0.1573	0.34449	0.99178	220	3	0.019243
FBgn0035249	10	0.74309	0.83484	0.982236	536	1	-0.095408	0.39099	0.60125	0.996536	373	2	-0.095408
FBgn0266411	10	0.74378	0.8351	0.982236	537	1	0.031723	0.016401	0.062433	0.843779	39	4	0.031723
FBgn0015570	8	0.74644	0.78624	0.982236	538	1	-1.0875	0.98403	0.98401	0.996536	642	0	-1.0875
FBgn0031561	9	0.74714	0.80829	0.982236	539	1	-0.12502	0.17226	0.34865	0.99178	237	2	-0.12502
FBgn0042627	10	0.74997	0.83702	0.982236	540	1	0.056014	0.27721	0.48345	0.992496	314	3	0.056014
FBgn0038715	10	0.75245	0.83785	0.982236	541	1	0.065749	0.019391	0.070775	0.843779	50	5	0.065749
FBgn0001250	10	0.75536	0.83873	0.982236	542	1	0.0091213	0.28045	0.48666	0.992496	315	3	0.0091213
FBgn0033272	10	0.76324	0.84146	0.982236	543	1	-0.12243	0.18771	0.39101	0.99178	247	3	-0.12243
FBgn0032642	10	0.76561	0.84223	0.982236	544	1	0.041732	0.26115	0.46753	0.99178	301	3	0.041732
FBgn0003731	10	0.77111	0.84408	0.982236	545	1	0.1665	0.091975	0.23413	0.941535	159	4	0.1665
FBgn0036962	10	0.77195	0.84434	0.982236	546	1	-0.095951	0.043435	0.13569	0.870242	97	4	-0.095951
FBgn0283472	10	0.77772	0.84632	0.982236	547	1	0.32616	0.0078003	0.033866	0.843779	20	5	0.32616
FBgn0031765	10	0.77833	0.84649	0.982236	548	1	-0.37357	0.93731	0.93776	0.996536	607	0	-0.37357
FBgn0038247	10	0.77894	0.84667	0.982236	549	1	0.10028	0.0077594	0.033678	0.843779	19	4	0.10028
FBgn0033733	10	0.77955	0.84694	0.982236	550	1	-0.0044227	0.19953	0.40314	0.99178	257	3	-0.0044227
FBgn0031420	10	0.78157	0.84761	0.982236	551	1	0.025726	0.1144	0.27295	0.967198	181	4	0.025726
FBgn0000384	10	0.78337	0.84829	0.982236	552	1	0.45464	0.00072104	0.0041114	0.710484	3	7	0.45464
FBgn0036018	10	0.78614	0.84939	0.982236	553	1	-0.71907	0.39665	0.60694	0.996536	378	3	-0.71907
FBgn0016081	10	0.78771	0.84984	0.982236	554	1	-0.53258	0.86497	0.88288	0.996536	569	1	-0.53258
FBgn0038952	10	0.79005	0.85087	0.982236	555	1	0.053857	0.13638	0.3107	0.99178	202	3	0.053857
FBgn0029661	4	0.79155	0.79233	0.982236	556	0	-0.20347	0.89886	0.89964	0.996536	588	0	-0.20347
FBgn0030805	4	0.79155	0.79233	0.982236	557	0	-0.48983	0.54305	0.55272	0.996536	432	1	-0.48983
FBgn0040068	10	0.7971	0.85361	0.982236	558	1	-1.0198	0.96978	0.97066	0.996536	630	0	-1.0198
FBgn0038332	10	0.80138	0.8552	0.982236	559	1	0.16865	0.11084	0.26703	0.967198	178	3	0.16865
FBgn0035336	10	0.80395	0.85612	0.982236	560	1	0.0099866	0.034545	0.11195	0.870242	79	5	0.0099866
FBgn0035703	10	0.80648	0.85712	0.982236	561	1	-0.10007	0.013337	0.053795	0.843779	33	3	-0.10007
FBgn0030855	10	0.81804	0.862	0.982236	562	1	0.15962	0.05258	0.15863	0.870242	115	5	0.15962
FBgn0031533	10	0.82175	0.8638	0.982236	563	1	-0.3784	0.76216	0.83918	0.996536	536	1	-0.3784
FBgn0250819	10	0.82242	0.86411	0.982236	564	1	-0.11191	0.41164	0.62191	0.996536	382	2	-0.11191
FBgn0259152	10	0.82572	0.8656	0.982236	565	1	-8.2186e-05	0.32869	0.5369	0.996536	336	2	-8.2186e-05
FBgn0027101	10	0.82752	0.86644	0.982236	566	1	-0.79342	0.96893	0.96967	0.996536	629	0	-0.79342
FBgn0052383	10	0.82833	0.8668	0.982236	567	1	-0.78864	0.1262	0.29339	0.989508	192	3	-0.78864
FBgn0000274	10	0.82929	0.86712	0.982236	568	1	-0.14356	0.034156	0.11106	0.870242	78	4	-0.14356
FBgn0024996	10	0.83499	0.86934	0.982236	569	1	-0.14982	0.5691	0.72129	0.996536	443	1	-0.14982
FBgn0260779	10	0.8367	0.87014	0.982236	570	1	0.16619	0.14008	0.31683	0.99178	206	4	0.16619
FBgn0038331	10	0.84382	0.87345	0.982236	571	1	-0.13977	0.067766	0.19145	0.881891	137	4	-0.13977
FBgn0031462	10	0.84471	0.87386	0.982236	572	1	0.12079	0.23652	0.44211	0.99178	279	2	0.12079
FBgn0266347	9	0.84828	0.8587	0.982236	573	1	0.42633	0.048046	0.14039	0.870242	105	4	0.42633
FBgn0012058	10	0.85037	0.87663	0.982236	574	1	-0.27837	0.69578	0.8101	0.996536	511	2	-0.27837
FBgn0039305	10	0.8525	0.8778	0.982236	575	1	0.4187	0.0027306	0.013967	0.808065	11	6	0.4187
FBgn0020622	10	0.85599	0.87934	0.982236	576	1	-0.43308	0.88951	0.89799	0.996536	580	1	-0.43308
FBgn0000039	10	0.86379	0.88329	0.982236	577	1	-0.017427	0.39607	0.60643	0.996536	377	3	-0.017427
FBgn0030812	10	0.86536	0.88412	0.982236	578	1	0.14215	0.058202	0.17314	0.881891	126	5	0.14215
FBgn0039777	9	0.86566	0.87074	0.982236	579	1	-0.16414	0.88751	0.88675	0.996536	577	1	-0.16414
FBgn0032871	10	0.86626	0.8845	0.982236	580	1	-0.022229	0.29058	0.49732	0.995113	322	2	-0.022229
FBgn0029834	10	0.86678	0.88473	0.982236	581	1	0.35224	0.0014749	0.0078023	0.783871	6	7	0.35224
FBgn0052633	10	0.87159	0.88793	0.982236	582	1	0.10377	0.022652	0.080304	0.843779	60	2	0.10377
FBgn0263076	10	0.87184	0.88807	0.982236	583	1	0.49023	0.010558	0.044192	0.843779	24	6	0.49023
FBgn0030620	10	0.87233	0.88833	0.982236	584	1	0.12966	0.0023653	0.012413	0.808065	10	4	0.12966
FBgn0031461	10	0.87283	0.88857	0.982236	585	1	0.099442	0.041326	0.12995	0.870242	94	5	0.099442
FBgn0039098	10	0.87779	0.89141	0.982236	586	1	0.022755	0.3695	0.57845	0.996536	356	3	0.022755
FBgn0040234	10	0.8819	0.89399	0.982236	587	1	0.018792	0.44125	0.64264	0.996536	393	2	0.018792
FBgn0004919	10	0.88509	0.89583	0.982236	588	1	-0.09894	0.096583	0.2422	0.941535	166	4	-0.09894
FBgn0005198	3	0.88857	0.88853	0.982236	589	0	0.54115	0.024767	0.051806	0.843779	65	2	0.54115
FBgn0024326	10	0.88864	0.89804	0.982236	590	1	0.16715	0.09233	0.23482	0.941535	160	3	0.16715
FBgn0053159	10	0.89124	0.89986	0.982236	591	1	-0.17724	0.82007	0.8614	0.996536	555	1	-0.17724
FBgn0025781	10	0.89337	0.90114	0.982236	592	1	0.11937	0.27325	0.47949	0.992496	311	2	0.11937
FBgn0038524	10	0.89607	0.90296	0.982236	593	1	0.080038	0.09855	0.24555	0.941765	169	4	0.080038
FBgn0033935	10	0.8972	0.90374	0.982236	594	1	0.20832	0.012505	0.050757	0.843779	32	6	0.20832
FBgn0010379	10	0.89811	0.90437	0.982236	595	1	0.015564	0.24591	0.45172	0.99178	290	2	0.015564
FBgn0025115	10	0.9014	0.90657	0.982236	596	1	-0.15863	0.14778	0.32909	0.99178	213	2	-0.15863
FBgn0034142	6	0.90483	0.90471	0.982236	597	0	-0.65062	0.3674	0.50519	0.995113	354	1	-0.65062
FBgn0031216	6	0.90483	0.90471	0.982236	598	0	-0.45596	0.076524	0.16963	0.877752	147	1	-0.45596
FBgn0038721	10	0.90933	0.91247	0.982236	599	1	-0.71931	0.66754	0.78892	0.996536	494	2	-0.71931
FBgn0263987	5	0.94517	0.94479	0.982236	600	0	0.72943	0.0050487	0.017351	0.808065	16	3	0.72943
FBgn0030789	8	0.95655	0.95561	0.982236	601	0	-0.43883	0.97804	0.97757	0.996536	638	0	-0.43883
FBgn0037826	8	0.95655	0.95561	0.982236	602	0	-0.13655	0.83103	0.83748	0.996536	557	1	-0.13655
FBgn0024332	8	0.95655	0.95561	0.982236	603	0	-0.73836	0.94389	0.94306	0.996536	612	0	-0.73836
FBgn0037327	9	0.97064	0.96954	0.982236	604	0	0.12795	0.25246	0.44183	0.99178	293	3	0.12795
FBgn0020224	9	0.97064	0.96954	0.982236	605	0	0.33509	0.0046515	0.020894	0.843779	15	6	0.33509
FBgn0029117	10	0.98016	0.98073	0.982236	606	0	0.22696	0.039821	0.12619	0.870242	91	5	0.22696
FBgn0040098	10	0.98016	0.98073	0.982236	607	0	-1.0875	0.83855	0.86977	0.996536	559	1	-1.0875
FBgn0030449	10	0.98016	0.98073	0.982236	608	0	0.12555	0.097677	0.24405	0.941535	168	3	0.12555
FBgn0033397	10	0.98016	0.98073	0.982236	609	0	0.038251	0.34181	0.55047	0.996536	342	1	0.038251
FBgn0026317	10	0.98016	0.98073	0.982236	610	0	-0.17234	0.45172	0.6487	0.996536	398	2	-0.17234
FBgn0028476	10	0.98016	0.98073	0.982236	611	0	-0.0024141	0.27502	0.48133	0.992496	313	3	-0.0024141
FBgn0046332	10	0.98016	0.98073	0.982236	612	0	0.049292	0.21304	0.41784	0.99178	268	3	0.049292
FBgn0036671	10	0.98016	0.98073	0.982236	613	0	-0.22498	0.49133	0.67182	0.996536	413	2	-0.22498
FBgn0015039	10	0.98016	0.98073	0.982236	614	0	0.29543	0.0001276	0.00088561	0.28871	2	8	0.29543
FBgn0026136	10	0.98016	0.98073	0.982236	615	0	0.061379	0.041052	0.12928	0.870242	92	4	0.061379
FBgn0035046	10	0.98016	0.98073	0.982236	616	0	0.25956	0.012468	0.050628	0.843779	30	5	0.25956
FBgn0033266	10	0.98016	0.98073	0.982236	617	0	0.15752	0.11012	0.26575	0.967198	176	3	0.15752
FBgn0031183	10	0.98016	0.98073	0.982236	618	0	0.12864	0.05258	0.15863	0.870242	116	5	0.12864
FBgn0036398	10	0.98016	0.98073	0.982236	619	0	-0.22602	0.46265	0.65499	0.996536	403	1	-0.22602
FBgn0035533	10	0.98016	0.98073	0.982236	620	0	-0.41669	0.78177	0.84586	0.996536	541	1	-0.41669
FBgn0034363	10	0.98016	0.98073	0.982236	621	0	-0.72293	0.9461	0.94674	0.996536	614	0	-0.72293
FBgn0038515	10	0.98016	0.98073	0.982236	622	0	0.19663	0.092698	0.23541	0.941535	162	3	0.19663
FBgn0265089	10	0.98016	0.98073	0.982236	623	0	-0.013705	0.35119	0.56043	0.996536	345	3	-0.013705
FBgn0262733	10	0.98016	0.98073	0.982236	624	0	0.17071	0.051939	0.1571	0.870242	111	5	0.17071
FBgn0037889	10	0.98016	0.98073	0.982236	625	0	-0.017522	0.46942	0.65872	0.996536	404	2	-0.017522
FBgn0032820	10	0.98016	0.98073	0.982236	626	0	-0.63784	0.54909	0.70797	0.996536	435	1	-0.63784
FBgn0267339	10	0.98016	0.98073	0.982236	627	0	-1.0875	0.19532	0.3987	0.99178	253	3	-1.0875
FBgn0029722	10	0.98016	0.98073	0.982236	628	0	-0.72055	0.57352	0.72419	0.996536	445	1	-0.72055
FBgn0270924	10	0.98016	0.98073	0.982236	629	0	-0.090452	0.030358	0.1007	0.863879	75	2	-0.090452
FBgn0016930	10	0.98016	0.98073	0.982236	630	0	-0.08205	0.6418	0.77076	0.996536	480	2	-0.08205
FBgn0038598	10	0.98016	0.98073	0.982236	631	0	0.23343	0.054608	0.16427	0.877752	122	5	0.23343
FBgn0033471	10	0.98016	0.98073	0.982236	632	0	-0.1513	0.86536	0.88318	0.996536	570	1	-0.1513
FBgn0036187	10	0.98016	0.98073	0.982236	633	0	-0.13452	0.9722	0.97276	0.996536	634	0	-0.13452
FBgn0250823	10	0.98016	0.98073	0.982236	634	0	-0.061158	0.13182	0.30322	0.99178	198	4	-0.061158
FBgn0034858	10	0.98016	0.98073	0.982236	635	0	0.16406	0.016372	0.062334	0.843779	38	3	0.16406
FBgn0264298	10	0.98016	0.98073	0.982236	636	0	0.16994	0.026784	0.091327	0.859828	67	5	0.16994
FBgn0086358	10	0.98016	0.98073	0.982236	637	0	-1.0875	0.70766	0.81897	0.996536	518	2	-1.0875
FBgn0037492	10	0.98016	0.98073	0.982236	638	0	-0.086011	0.29774	0.50486	0.995113	326	3	-0.086011
FBgn0003256	10	0.98016	0.98073	0.982236	639	0	-1.0875	0.17623	0.37463	0.99178	239	3	-1.0875
FBgn0041184	10	0.98016	0.98073	0.982236	640	0	0.17364	0.039758	0.12602	0.870242	90	4	0.17364
FBgn0004864	10	0.98016	0.98073	0.982236	641	0	-0.77005	0.0086481	0.036934	0.843779	21	1	-0.77005
FBgn0037828	10	0.98016	0.98073	0.982236	642	0	-0.16872	0.22821	0.43331	0.99178	274	1	-0.16872
FBgn0028562	10	0.98016	0.98073	0.982236	643	0	-0.13363	0.36661	0.57577	0.996536	352	3	-0.13363
FBgn0020299	10	0.98016	0.98073	0.982236	644	0	0.10761	0.05164	0.15632	0.870242	110	4	0.10761
FBgn0025549	10	0.98016	0.98073	0.982236	645	0	0.012349	0.11299	0.27067	0.967198	179	3	0.012349
FBgn0053506	10	0.98016	0.98073	0.982236	646	0	0.11315	0.055144	0.16563	0.877752	123	4	0.11315
FBgn0010395	10	0.98016	0.98073	0.982236	647	0	0.19787	0.022095	0.078869	0.843779	59	4	0.19787
FBgn0052425	10	0.98016	0.98073	0.982236	648	0	-0.27042	0.65505	0.78019	0.996536	489	2	-0.27042
FBgn0261832	10	0.98016	0.98073	0.982236	649	0	-0.14808	0.16525	0.35778	0.99178	232	2	-0.14808
FBgn0035496	10	0.98016	0.98073	0.982236	650	0	-0.027217	0.13904	0.31506	0.99178	205	4	-0.027217
FBgn0039357	10	0.98016	0.98073	0.982236	651	0	-0.37552	0.039469	0.12535	0.870242	88	4	-0.37552
FBgn0041164	10	0.99735	0.99745	0.997452	652	0	0.089223	0.027283	0.092791	0.859828	68	3	0.089223

## Sheet: S1C 30 days
id	num	neg|score	neg|p-value	neg|fdr	neg|rank	neg|goodsgrna	neg|lfc	pos|score	pos|p-value	pos|fdr	pos|rank	pos|goodsgrna	pos|lfc
FBgn0038681	10	7.5025e-10	4.9476e-06	0.001613	1	5	-1.288	0.9584	0.959	0.999135	625	0	-1.288
FBgn0041094	10	1.2893e-07	4.9476e-06	0.001613	2	8	-2.0199	0.99891	0.999	0.999936	650	0	-2.0199
FBgn0010015	10	0.00030104	0.0020829	0.452688	3	7	-0.51738	0.95381	0.95431	0.999135	621	0	-0.51738
FBgn0010316	7	0.0010576	0.0052988	0.756774	4	2	-1.0419	0.94299	0.9435	0.994179	617	0	-1.0419
FBgn0034307	10	0.0010708	0.0058035	0.756774	5	7	-0.82025	0.91568	0.9194	0.994179	601	1	-0.82025
FBgn0026417	10	0.0013639	0.007268	0.789785	6	7	-1.0558	0.65315	0.78296	0.989325	504	1	-1.0558
FBgn0062412	10	0.0016469	0.0088611	0.825346	7	5	-1.0419	0.44479	0.65479	0.989325	413	2	-1.0419
FBgn0035425	10	0.0024307	0.012839	0.978136	8	3	-0.50519	0.55517	0.7215	0.989325	467	2	-0.50519
FBgn0259228	10	0.002532	0.013502	0.978136	9	2	-0.41181	0.49133	0.68499	0.989325	439	2	-0.41181
FBgn0014011	10	0.0046991	0.022309	0.981312	10	5	-1.0419	0.92755	0.92853	0.994179	607	1	-1.0419
FBgn0036038	10	0.005277	0.024456	0.981312	11	6	-0.60454	0.99874	0.99887	0.999936	649	0	-0.60454
FBgn0034356	10	0.005433	0.025079	0.981312	12	5	-0.67093	0.86074	0.88784	0.990616	579	1	-0.67093
FBgn0003499	10	0.0054708	0.025247	0.981312	13	4	-0.44966	0.18839	0.39415	0.982442	245	4	-0.44966
FBgn0032700	10	0.0059979	0.027444	0.981312	14	4	-0.4949	0.74517	0.84681	0.990616	547	1	-0.4949
FBgn0037081	10	0.0070807	0.031313	0.981312	15	2	0.033398	0.22595	0.44272	0.982442	288	3	0.033398
FBgn0046689	10	0.0076038	0.033322	0.981312	16	4	-0.74675	0.93492	0.93545	0.994179	611	1	-0.74675
FBgn0260398	10	0.007649	0.03347	0.981312	17	4	-0.42571	0.70217	0.81648	0.989489	535	2	-0.42571
FBgn0259168	10	0.0076773	0.033619	0.981312	18	5	-0.80777	0.56688	0.7288	0.989325	473	2	-0.80777
FBgn0003371	10	0.0085096	0.036686	0.981312	19	4	-0.4564	0.29489	0.50974	0.984977	325	3	-0.4564
FBgn0261858	10	0.0086481	0.037201	0.981312	20	1	-0.093276	0.90988	0.91552	0.994179	599	1	-0.093276
FBgn0000036	10	0.0090304	0.038675	0.981312	21	3	-0.35683	0.15045	0.33585	0.982442	207	4	-0.35683
FBgn0019990	10	0.0090602	0.038764	0.981312	22	3	-0.35085	0.25951	0.47558	0.98431	311	1	-0.35085
FBgn0034650	10	0.01005	0.042455	0.981312	23	5	-0.41747	0.60187	0.75017	0.989325	484	2	-0.41747
FBgn0036827	10	0.010348	0.043573	0.981312	24	6	-0.67346	0.32979	0.54362	0.984977	349	1	-0.67346
FBgn0011300	10	0.011009	0.04574	0.981312	25	4	0.1148	0.050882	0.15504	0.982442	97	5	0.1148
FBgn0001281	10	0.011408	0.047224	0.981312	26	6	-0.59147	0.67498	0.79714	0.989325	523	2	-0.59147
FBgn0033199	10	0.011776	0.048362	0.981312	27	2	-0.67953	0.03951	0.12678	0.982442	79	3	-0.67953
FBgn0039726	10	0.011981	0.048976	0.981312	28	4	-0.45601	0.67084	0.79424	0.989325	518	2	-0.45601
FBgn0036970	10	0.012185	0.049659	0.981312	29	3	-0.13404	0.014479	0.057703	0.895776	42	4	-0.13404
FBgn0039584	10	0.012474	0.050767	0.981312	30	4	-0.48042	0.070525	0.20277	0.982442	127	2	-0.48042
FBgn0261524	9	0.013075	0.050025	0.981312	31	3	-0.43598	0.95699	0.95592	0.999135	623	0	-0.43598
FBgn0035469	10	0.01313	0.053092	0.981312	32	3	-0.24113	0.58653	0.74095	0.989325	476	2	-0.24113
FBgn0265784	10	0.013337	0.053904	0.981312	33	4	-0.38736	0.83153	0.87557	0.990616	568	1	-0.38736
FBgn0040368	10	0.013563	0.054606	0.981312	34	3	-0.16402	0.036482	0.11894	0.982442	76	4	-0.16402
FBgn0004895	10	0.016905	0.066045	0.981312	35	4	-0.076004	0.055351	0.16659	0.982442	103	3	-0.076004
FBgn0022382	7	0.018999	0.062354	0.981312	36	3	-0.00086941	0.22341	0.40128	0.982442	285	2	-0.00086941
FBgn0259166	9	0.019316	0.067955	0.981312	37	4	-1.0419	0.99995	0.99994	0.999936	652	0	-1.0419
FBgn0004108	10	0.019557	0.073625	0.981312	38	2	-0.22666	0.68187	0.80207	0.989325	524	2	-0.22666
FBgn0034783	10	0.020763	0.077098	0.981312	39	5	-0.91563	0.98883	0.9894	0.999936	644	0	-0.91563
FBgn0085447	10	0.02103	0.077691	0.981312	40	5	-0.73212	0.98002	0.98053	0.999936	639	0	-0.73212
FBgn0023169	10	0.021338	0.078691	0.981312	41	5	-0.49547	0.53343	0.70922	0.989325	460	1	-0.49547
FBgn0033315	10	0.021552	0.079473	0.981312	42	5	-0.97537	0.76539	0.85275	0.990616	550	1	-0.97537
FBgn0037156	9	0.021806	0.075336	0.981312	43	1	-0.087008	0.21314	0.40372	0.982442	277	3	-0.087008
FBgn0042137	10	0.021901	0.080423	0.981312	44	4	-0.25635	0.83624	0.87737	0.990616	571	1	-0.25635
FBgn0002940	10	0.022373	0.081798	0.981312	45	4	-1.0419	0.78337	0.85818	0.990616	553	1	-1.0419
FBgn0030674	5	0.022665	0.062651	0.981312	46	3	-1.0419	0.99581	0.99602	0.999936	646	0	-1.0419
FBgn0030505	10	0.022715	0.082639	0.981312	47	4	-0.62748	0.13622	0.31365	0.982442	194	4	-0.62748
FBgn0264895	8	0.023125	0.078157	0.981312	48	2	-0.082836	0.19738	0.37193	0.982442	256	3	-0.082836
FBgn0052202	10	0.023296	0.084272	0.981312	49	5	-1.0419	0.99586	0.99601	0.999936	647	0	-1.0419
FBgn0024740	10	0.024214	0.086577	0.981312	50	2	-0.15273	0.052392	0.15875	0.982442	101	3	-0.15273
FBgn0035522	10	0.025899	0.090892	0.981312	51	4	-0.72473	0.81181	0.86785	0.990616	563	1	-0.72473
FBgn0031195	10	0.026219	0.091772	0.981312	52	4	-0.83645	0.61818	0.76037	0.989325	490	1	-0.83645
FBgn0003091	10	0.026259	0.091891	0.981312	53	5	-0.60661	0.90851	0.91474	0.994179	597	1	-0.60661
FBgn0000489	10	0.026865	0.093454	0.981312	54	4	-1.0419	0.87968	0.89733	0.990616	589	1	-1.0419
FBgn0034317	10	0.027257	0.094553	0.981312	55	5	-0.90529	0.23258	0.44916	0.982442	295	1	-0.90529
FBgn0004919	10	0.028234	0.096947	0.981312	56	5	-0.34856	0.72873	0.83518	0.990616	544	2	-0.34856
FBgn0001108	10	0.028434	0.097383	0.981312	57	3	-1.0419	0.92249	0.92468	0.994179	604	1	-1.0419
FBgn0004784	10	0.028849	0.098362	0.981312	58	5	-0.36567	0.36421	0.57709	0.984977	374	2	-0.36567
FBgn0051826	10	0.030358	0.10232	0.981312	59	2	-0.72494	0.40086	0.61318	0.989325	389	2	-0.72494
FBgn0042711	10	0.031425	0.10512	0.981312	60	4	-0.085958	0.090477	0.23748	0.982442	145	3	-0.085958
FBgn0003356	10	0.031893	0.10635	0.981312	61	2	-0.051077	0.057264	0.17126	0.982442	106	3	-0.051077
FBgn0020660	8	0.032286	0.099342	0.981312	62	2	-0.19655	0.0055035	0.022952	0.679523	23	4	-0.19655
FBgn0085384	10	0.032846	0.10898	0.981312	63	5	-0.811	0.41075	0.62248	0.989325	396	2	-0.811
FBgn0036451	10	0.033078	0.10953	0.981312	64	5	-0.57682	0.21368	0.4308	0.982442	278	2	-0.57682
FBgn0024992	10	0.033425	0.11054	0.981312	65	3	-0.22847	0.93943	0.93993	0.994179	613	0	-0.22847
FBgn0000229	10	0.034558	0.11336	0.981312	66	4	-0.086946	0.41007	0.622	0.989325	395	3	-0.086946
FBgn0053098	10	0.034895	0.11425	0.981312	67	4	-0.73584	0.86819	0.89111	0.990616	585	1	-0.73584
FBgn0051902	10	0.034955	0.11445	0.981312	68	1	0.18791	0.14309	0.32426	0.982442	199	4	0.18791
FBgn0033685	10	0.036415	0.11839	0.981312	69	5	-0.39988	0.41224	0.62387	0.989325	398	2	-0.39988
FBgn0003028	10	0.036611	0.11906	0.981312	70	4	-0.056836	0.10562	0.26347	0.982442	161	4	-0.056836
FBgn0031681	10	0.038008	0.12271	0.981312	71	1	-0.22581	0.34589	0.55963	0.984977	359	2	-0.22581
FBgn0010340	10	0.038121	0.12319	0.981312	72	5	-0.53433	0.67084	0.79424	0.989325	517	2	-0.53433
FBgn0039153	10	0.040015	0.12777	0.981312	73	3	-0.44339	0.063827	0.18712	0.982442	114	2	-0.44339
FBgn0029114	10	0.041052	0.13033	0.981312	74	4	-0.36436	0.69348	0.81026	0.989325	529	1	-0.36436
FBgn0029979	10	0.041393	0.13113	0.981312	75	4	-1.0419	0.15791	0.3474	0.982442	216	3	-1.0419
FBgn0030507	10	0.042571	0.13446	0.981312	76	2	-0.29736	0.82408	0.87281	0.990616	565	1	-0.29736
FBgn0034687	10	0.043308	0.13622	0.981312	77	5	-0.25808	0.18305	0.38582	0.982442	239	2	-0.25808
FBgn0030964	10	0.044088	0.13823	0.981312	78	4	-0.74646	0.12992	0.30331	0.982442	187	2	-0.74646
FBgn0086359	10	0.04416	0.13838	0.981312	79	3	-0.83872	0.71248	0.82356	0.990616	539	2	-0.83872
FBgn0032934	10	0.045603	0.14233	0.981312	80	2	-0.32842	0.93104	0.93156	0.994179	609	1	-0.32842
FBgn0052311	10	0.04745	0.14679	0.981312	81	3	-0.16151	0.036482	0.11894	0.982442	74	3	-0.16151
FBgn0086442	10	0.047997	0.148	0.981312	82	5	-0.33677	0.69495	0.81114	0.989325	530	2	-0.33677
FBgn0001965	8	0.048066	0.13396	0.981312	83	4	-0.61697	0.86283	0.86544	0.990616	581	1	-0.61697
FBgn0259152	10	0.050134	0.15305	0.981312	84	2	-0.25329	0.031057	0.10438	0.982442	67	3	-0.25329
FBgn0020440	10	0.050729	0.1545	0.981312	85	3	-1.0419	0.3621	0.57508	0.984977	373	1	-1.0419
FBgn0042712	10	0.05164	0.15679	0.981312	86	2	-0.36235	0.13401	0.31021	0.982442	190	1	-0.36235
FBgn0038332	10	0.052152	0.15801	0.981312	87	5	-0.47261	0.20357	0.41667	0.982442	265	2	-0.47261
FBgn0034715	10	0.054149	0.16342	0.981312	88	3	-0.88592	0.78732	0.85938	0.990616	555	1	-0.88592
FBgn0053159	10	0.054949	0.16542	0.981312	89	3	-0.19037	0.55712	0.72269	0.989325	468	2	-0.19037
FBgn0261854	8	0.05587	0.15183	0.981312	90	2	-0.11638	0.44801	0.60787	0.989325	416	2	-0.11638
FBgn0039064	10	0.056315	0.16887	0.981312	91	4	-0.42898	0.12679	0.29811	0.982442	183	4	-0.42898
FBgn0037538	10	0.057377	0.17149	0.981312	92	3	-0.25001	0.4148	0.62637	0.989325	400	2	-0.25001
FBgn0021856	10	0.057643	0.17199	0.981312	93	3	-0.52491	0.28505	0.49973	0.984977	319	2	-0.52491
FBgn0031897	10	0.058496	0.17404	0.981312	94	4	-0.32017	0.069919	0.20161	0.982442	126	3	-0.32017
FBgn0039924	10	0.059075	0.17554	0.981312	95	4	-1.0419	0.25103	0.46733	0.98431	306	1	-1.0419
FBgn0033272	10	0.059138	0.17571	0.981312	96	3	-0.41685	0.80395	0.86504	0.990616	561	1	-0.41685
FBgn0037714	10	0.060631	0.17935	0.981312	97	2	-0.41296	0.78693	0.85932	0.990616	554	1	-0.41296
FBgn0028983	10	0.066583	0.19393	0.981312	98	2	0.36956	0.0024728	0.013047	0.640927	12	5	0.36956
FBgn0034179	8	0.067225	0.17627	0.981312	99	4	-0.12184	0.38994	0.56403	0.984977	385	1	-0.12184
FBgn0030855	10	0.068774	0.19894	0.981312	100	2	0.05566	0.020193	0.075762	0.913267	51	4	0.05566
FBgn0014135	10	0.069045	0.19952	0.981312	101	4	-0.22301	0.94149	0.94206	0.994179	616	0	-0.22301
FBgn0031995	10	0.069647	0.20091	0.981312	102	3	-1.0419	0.53114	0.70807	0.989325	457	2	-1.0419
FBgn0039777	9	0.0697	0.1858	0.981312	103	3	-0.032678	0.20005	0.38952	0.982442	262	3	-0.032678
FBgn0027779	10	0.070525	0.2026	0.981312	104	3	-0.9619	0.21372	0.43086	0.982442	279	2	-0.9619
FBgn0003890	8	0.070696	0.18337	0.981312	105	3	-0.83208	0.065002	0.17188	0.982442	116	3	-0.83208
FBgn0264959	10	0.071849	0.20482	0.981312	106	3	-0.82278	0.20989	0.42642	0.982442	273	1	-0.82278
FBgn0010549	10	0.07352	0.20761	0.981312	107	4	-0.3627	0.85278	0.88447	0.990616	577	1	-0.3627
FBgn0031040	10	0.077149	0.21383	0.981312	108	4	-0.99201	0.99809	0.9982	0.999936	648	0	-0.99201
FBgn0030071	10	0.077434	0.2144	0.981312	109	3	-0.18441	0.3413	0.55494	0.984977	355	2	-0.18441
FBgn0085459	10	0.078268	0.21625	0.981312	110	4	-1.0193	0.56094	0.72507	0.989325	471	2	-1.0193
FBgn0035769	10	0.078384	0.21641	0.981312	111	3	-0.37984	0.68273	0.80266	0.989325	525	2	-0.37984
FBgn0039209	10	0.079512	0.21813	0.981312	112	3	-0.19452	0.27265	0.48792	0.984977	315	2	-0.19452
FBgn0032519	10	0.07985	0.21884	0.981312	113	2	-0.1177	0.020109	0.075515	0.913267	50	3	-0.1177
FBgn0069056	10	0.080312	0.21953	0.981312	114	4	-0.35743	0.2728	0.48802	0.984977	316	3	-0.35743
FBgn0028538	10	0.081827	0.22212	0.981312	115	4	-0.39124	0.73958	0.84336	0.990616	546	2	-0.39124
FBgn0038715	10	0.082745	0.22367	0.981312	116	3	-0.77491	0.036482	0.11894	0.982442	75	3	-0.77491
FBgn0015277	10	0.082946	0.22407	0.981312	117	3	-1.0408	0.86207	0.88837	0.990616	580	1	-1.0408
FBgn0035143	9	0.084055	0.21298	0.981312	118	1	0.25187	0.1532	0.336	0.982442	210	4	0.25187
FBgn0260648	10	0.084234	0.22611	0.981312	119	3	-0.74957	0.49077	0.68476	0.989325	438	2	-0.74957
FBgn0034202	10	0.08536	0.22802	0.981312	120	4	-0.67053	0.87159	0.89324	0.990616	586	1	-0.67053
FBgn0027794	10	0.085691	0.22855	0.981312	121	1	0.15696	0.068015	0.19748	0.982442	122	5	0.15696
FBgn0029147	10	0.087147	0.23102	0.981312	122	2	-0.18102	0.4992	0.68941	0.989325	442	2	-0.18102
FBgn0038448	10	0.0886	0.23347	0.981312	123	1	-0.083604	0.54777	0.71734	0.989325	466	2	-0.083604
FBgn0050438	10	0.090051	0.23604	0.981312	124	2	-0.86515	0.44616	0.65622	0.989325	414	3	-0.86515
FBgn0024329	10	0.090294	0.2365	0.981312	125	4	-0.4166	0.94306	0.94377	0.994179	618	0	-0.4166
FBgn0262081	10	0.091235	0.23832	0.981312	126	4	-0.75798	0.18791	0.39337	0.982442	244	1	-0.75798
FBgn0263782	8	0.091439	0.22607	0.981312	127	3	-0.46062	0.20326	0.37924	0.982442	264	3	-0.46062
FBgn0030384	10	0.0915	0.2387	0.981312	128	3	-0.7331	0.63509	0.77123	0.989325	495	1	-0.7331
FBgn0031463	10	0.092457	0.24042	0.981312	129	3	-0.2161	0.44301	0.65309	0.989325	411	2	-0.2161
FBgn0010389	10	0.09415	0.2432	0.981312	130	3	-0.20152	0.9691	0.96988	0.999135	630	0	-0.20152
FBgn0004861	10	0.094253	0.24342	0.981312	131	4	-0.18955	0.0725	0.20659	0.982442	129	3	-0.18955
FBgn0030305	10	0.095774	0.24605	0.981312	132	3	-0.052242	0.43479	0.64533	0.989325	408	2	-0.052242
FBgn0042627	10	0.095834	0.24612	0.981312	133	2	-0.020717	0.036842	0.11987	0.982442	77	4	-0.020717
FBgn0038258	10	0.09609	0.24647	0.981312	134	3	-0.36353	0.40326	0.61534	0.989325	391	2	-0.36353
FBgn0030538	8	0.096094	0.23529	0.981312	135	3	-0.22532	0.024361	0.082322	0.913267	62	3	-0.22532
FBgn0052105	10	0.096586	0.24734	0.981312	136	3	0.16154	0.013586	0.054745	0.895776	38	5	0.16154
FBgn0039797	10	0.097275	0.24838	0.981312	137	3	-0.18139	0.095834	0.24681	0.982442	151	4	-0.18139
FBgn0051992	10	0.097358	0.24854	0.981312	138	3	-0.18642	0.58739	0.74142	0.989325	477	2	-0.18642
FBgn0033128	10	0.097947	0.24961	0.981312	139	4	-0.19273	0.19995	0.41108	0.982442	261	3	-0.19273
FBgn0036489	4	0.09869	0.178	0.981312	140	2	-1.0827	0.42542	0.47384	0.98431	404	1	-1.0827
FBgn0050476	10	0.098713	0.25089	0.981312	141	2	-0.035888	0.69992	0.81483	0.989325	534	2	-0.035888
FBgn0000711	10	0.099697	0.25271	0.981312	142	4	-0.086124	0.15788	0.34733	0.982442	215	4	-0.086124
FBgn0050378	10	0.10077	0.25456	0.981312	143	2	0.26649	0.052295	0.15853	0.982442	99	5	0.26649
FBgn0033917	10	0.10134	0.25558	0.981312	144	4	-0.40033	0.49513	0.68695	0.989325	440	1	-0.40033
FBgn0032372	10	0.10158	0.25599	0.981312	145	2	0.24387	0.058702	0.17464	0.982442	108	5	0.24387
FBgn0261560	10	0.10159	0.25599	0.981312	146	4	-0.40208	0.35552	0.569	0.984977	366	3	-0.40208
FBgn0015010	10	0.10301	0.25838	0.981312	147	3	-0.19248	0.51805	0.70055	0.989325	450	2	-0.19248
FBgn0020236	10	0.10466	0.26107	0.981312	148	4	-0.39151	0.11212	0.274	0.982442	168	2	-0.39151
FBgn0063495	10	0.1048	0.26132	0.981312	149	3	-1.0419	0.24615	0.46254	0.982442	303	1	-1.0419
FBgn0037688	10	0.1048	0.26132	0.981312	150	3	-0.17715	0.073974	0.20932	0.982442	131	2	-0.17715
FBgn0001187	10	0.1048	0.26132	0.981312	151	3	-0.12231	0.2363	0.45296	0.982442	297	2	-0.12231
FBgn0038584	10	0.1048	0.26132	0.981312	152	3	-0.12541	0.35682	0.57015	0.984977	367	2	-0.12541
FBgn0044826	10	0.1048	0.26132	0.981312	153	3	-1.0419	0.21244	0.42964	0.982442	276	1	-1.0419
FBgn0035101	10	0.10552	0.26256	0.981312	154	3	-0.23974	0.016452	0.064481	0.913267	45	2	-0.23974
FBgn0023023	10	0.10588	0.26335	0.981312	155	3	-0.040864	0.0059979	0.027513	0.731813	24	4	-0.040864
FBgn0033500	10	0.10909	0.26852	0.981312	156	4	-0.38218	0.48826	0.68343	0.989325	436	1	-0.38218
FBgn0011826	10	0.11015	0.27011	0.981312	157	2	-0.38675	0.13964	0.31913	0.982442	196	3	-0.38675
FBgn0015828	10	0.11094	0.27145	0.981312	158	4	-0.28697	0.79767	0.86301	0.990616	558	1	-0.28697
FBgn0061469	10	0.1111	0.27171	0.981312	159	4	-0.39855	0.10447	0.26154	0.982442	159	3	-0.39855
FBgn0003448	10	0.11157	0.27236	0.981312	160	2	-0.0068334	0.12359	0.29268	0.982442	177	4	-0.0068334
FBgn0044047	10	0.11228	0.27362	0.981312	161	4	-0.043688	0.20305	0.41583	0.982442	263	4	-0.043688
FBgn0034730	10	0.113	0.27488	0.981312	162	3	-0.19376	0.67346	0.79613	0.989325	522	2	-0.19376
FBgn0053169	10	0.11314	0.2751	0.981312	163	2	-0.4401	0.95804	0.95864	0.999135	624	0	-0.4401
FBgn0264078	10	0.11335	0.27543	0.981312	164	4	-0.3006	0.063819	0.18711	0.982442	113	4	-0.3006
FBgn0016794	9	0.11434	0.26752	0.981312	165	2	-1.0419	0.46839	0.64303	0.989325	423	2	-1.0419
FBgn0032405	10	0.11582	0.27919	0.981312	166	1	-0.042556	0.66807	0.79239	0.989325	514	2	-0.042556
FBgn0030761	10	0.11674	0.28061	0.981312	167	4	0.28308	0.01687	0.065946	0.913267	46	6	0.28308
FBgn0033656	10	0.11832	0.28319	0.981312	168	2	-0.97734	0.12496	0.29513	0.982442	178	1	-0.97734
FBgn0033246	10	0.11864	0.28375	0.981312	169	1	-0.55039	0.65279	0.78269	0.989325	503	2	-0.55039
FBgn0262739	7	0.11937	0.25145	0.981312	170	2	-0.2686	0.41196	0.56222	0.984977	397	2	-0.2686
FBgn0030332	10	0.12145	0.28845	0.981312	171	1	0.0080517	0.14367	0.32525	0.982442	200	3	0.0080517
FBgn0001179	10	0.12185	0.28918	0.981312	172	4	-0.42028	0.79692	0.86276	0.990616	557	1	-0.42028
FBgn0050094	10	0.12438	0.29342	0.981312	173	4	-1.0419	0.98789	0.98855	0.999936	642	0	-1.0419
FBgn0037828	10	0.12566	0.29576	0.981312	174	2	-0.70978	0.95075	0.95134	0.999135	620	0	-0.70978
FBgn0032642	10	0.1262	0.29659	0.981312	175	2	0.12835	0.19288	0.40085	0.982442	251	4	0.12835
FBgn0262866	9	0.1266	0.28921	0.981312	176	2	-1.0419	0.2568	0.45208	0.982442	310	1	-1.0419
FBgn0010269	10	0.12915	0.30151	0.981312	177	2	0.097599	0.21761	0.43469	0.982442	282	3	0.097599
FBgn0038197	4	0.131	0.22024	0.981312	178	2	-0.49238	0.91987	0.92003	0.994179	603	0	-0.49238
FBgn0027570	10	0.1327	0.30764	0.981312	179	4	0.1625	0.066018	0.19265	0.982442	119	5	0.1625
FBgn0283472	10	0.13293	0.30802	0.981312	180	3	0.11281	0.08555	0.2291	0.982442	141	4	0.11281
FBgn0021796	10	0.13386	0.30948	0.981312	181	4	-0.25165	0.31814	0.53246	0.984977	340	2	-0.25165
FBgn0086384	9	0.13529	0.3046	0.981312	182	2	-0.9968	0.8437	0.86152	0.990616	573	1	-0.9968
FBgn0037679	10	0.13549	0.31207	0.981312	183	4	-0.33243	0.90478	0.91217	0.994179	596	1	-0.33243
FBgn0028500	10	0.13666	0.31389	0.981312	184	4	-0.84056	0.35287	0.56651	0.984977	364	3	-0.84056
FBgn0034996	10	0.13678	0.31407	0.981312	185	2	-0.75362	0.015769	0.062146	0.913267	43	4	-0.75362
FBgn0000326	10	0.14087	0.32048	0.981312	186	3	-0.32421	0.12323	0.29217	0.982442	176	3	-0.32421
FBgn0032664	10	0.14143	0.32133	0.981312	187	3	0.024656	0.58582	0.74048	0.989325	475	2	0.024656
FBgn0033115	10	0.1423	0.32272	0.981312	188	2	0.1773	0.18531	0.38936	0.982442	242	4	0.1773
FBgn0040871	10	0.14237	0.32281	0.981312	189	2	-0.043952	0.41321	0.62482	0.989325	399	3	-0.043952
FBgn0023197	10	0.14367	0.32482	0.981312	190	2	-0.21919	0.1618	0.35387	0.982442	218	3	-0.21919
FBgn0034964	10	0.14431	0.32578	0.981312	191	4	-0.30308	0.098713	0.25158	0.982442	153	3	-0.30308
FBgn0259243	10	0.1469	0.32998	0.981312	192	4	-0.33252	0.32204	0.53632	0.984977	342	1	-0.33252
FBgn0040234	10	0.14708	0.33026	0.981312	193	3	0.0715	0.098819	0.25176	0.982442	154	4	0.0715
FBgn0029893	10	0.14859	0.33262	0.981312	194	4	-0.96702	0.25649	0.47271	0.98431	309	2	-0.96702
FBgn0031662	10	0.14859	0.33262	0.981312	195	4	-0.39615	0.6047	0.75209	0.989325	485	1	-0.39615
FBgn0016984	10	0.14859	0.33262	0.981312	196	4	-0.21068	0.71685	0.82685	0.990616	541	2	-0.21068
FBgn0039532	10	0.15107	0.33651	0.981312	197	4	-0.24196	0.31396	0.52818	0.984977	334	2	-0.24196
FBgn0030686	10	0.15169	0.33775	0.981312	198	4	-0.32006	0.21666	0.43376	0.982442	281	2	-0.32006
FBgn0259189	10	0.15206	0.33833	0.981312	199	3	-0.20579	0.23817	0.45449	0.982442	299	3	-0.20579
FBgn0035090	10	0.15324	0.34	0.981312	200	2	-0.086383	0.22506	0.44183	0.982442	287	2	-0.086383
FBgn0030035	10	0.15403	0.34139	0.981312	201	4	-0.1494	0.19053	0.39757	0.982442	247	2	-0.1494
FBgn0038862	10	0.15455	0.3422	0.981312	202	3	-0.4269	0.63762	0.7728	0.989325	496	2	-0.4269
FBgn0036908	10	0.15459	0.34224	0.981312	203	2	0.12083	0.068301	0.19803	0.982442	123	4	0.12083
FBgn0034567	10	0.15529	0.34325	0.981312	204	4	-0.38692	0.52788	0.70617	0.989325	453	2	-0.38692
FBgn0086708	10	0.15539	0.3434	0.981312	205	3	-0.25346	0.11582	0.27977	0.982442	169	2	-0.25346
FBgn0036695	10	0.15595	0.34428	0.981312	206	3	-0.37451	0.66312	0.78922	0.989325	511	2	-0.37451
FBgn0026179	10	0.15655	0.34511	0.981312	207	4	-0.30306	0.22257	0.43951	0.982442	284	2	-0.30306
FBgn0025626	10	0.15735	0.34623	0.981312	208	2	-0.6044	0.50867	0.69502	0.989325	447	2	-0.6044
FBgn0034858	10	0.15827	0.34774	0.981312	209	3	-0.43968	0.45286	0.6625	0.989325	418	3	-0.43968
FBgn0039125	10	0.15829	0.34778	0.981312	210	4	-0.28684	0.22882	0.44543	0.982442	292	3	-0.28684
FBgn0024542	10	0.15866	0.3485	0.981312	211	2	-0.62654	0.70787	0.82014	0.990245	537	2	-0.62654
FBgn0023512	10	0.16001	0.35072	0.981312	212	2	0.041322	0.08228	0.22376	0.982442	138	2	0.041322
FBgn0022800	10	0.16214	0.35415	0.981312	213	3	-0.54779	0.092947	0.24181	0.982442	148	3	-0.54779
FBgn0283536	10	0.16214	0.35415	0.981312	214	3	-1.0419	0.97143	0.97204	0.999135	631	0	-1.0419
FBgn0024811	10	0.1627	0.35489	0.981312	215	2	-0.9976	0.40863	0.62052	0.989325	394	3	-0.9976
FBgn0037074	10	0.16606	0.36028	0.981312	216	1	-0.087138	0.022654	0.082748	0.913267	56	3	-0.087138
FBgn0031830	10	0.16616	0.36054	0.981312	217	3	-0.51345	0.10445	0.2615	0.982442	158	1	-0.51345
FBgn0050046	10	0.16828	0.36368	0.981312	218	4	0.12573	0.28981	0.50442	0.984977	320	3	0.12573
FBgn0004638	10	0.1694	0.36533	0.981312	219	2	-1.0419	0.33582	0.54991	0.984977	351	1	-1.0419
FBgn0035742	10	0.17038	0.36689	0.981312	220	2	-1.0419	0.45994	0.66817	0.989325	421	2	-1.0419
FBgn0037647	10	0.17207	0.36935	0.981312	221	2	-0.063122	0.20713	0.42187	0.982442	271	3	-0.063122
FBgn0015586	10	0.17218	0.36947	0.981312	222	3	-0.017782	0.04072	0.12982	0.982442	82	5	-0.017782
FBgn0014141	10	0.17267	0.37034	0.981312	223	3	-0.23657	0.010213	0.043059	0.895776	31	4	-0.23657
FBgn0035627	10	0.17473	0.37316	0.981312	224	2	-0.27954	0.021107	0.078216	0.913267	53	2	-0.27954
FBgn0260972	10	0.17562	0.37453	0.981312	225	3	-1.0419	0.23133	0.44797	0.982442	294	1	-1.0419
FBgn0037678	10	0.17606	0.37517	0.981312	226	2	-0.073595	0.14642	0.32948	0.982442	203	2	-0.073595
FBgn0014427	10	0.17738	0.37718	0.981312	227	3	-0.0034997	0.29024	0.50492	0.984977	321	3	-0.0034997
FBgn0270928	10	0.17756	0.37745	0.981312	228	2	0.10132	0.53276	0.7088	0.989325	459	2	0.10132
FBgn0033913	10	0.17827	0.37847	0.981312	229	3	-0.78204	0.20734	0.4222	0.982442	272	1	-0.78204
FBgn0036096	10	0.17871	0.37918	0.981312	230	1	0.0082817	0.3695	0.58209	0.985781	376	3	0.0082817
FBgn0053121	9	0.17922	0.36554	0.981312	231	2	-0.30554	0.98509	0.98405	0.999936	641	0	-0.30554
FBgn0029522	10	0.18003	0.38123	0.981312	232	2	0.027404	0.15798	0.34754	0.982442	217	4	0.027404
FBgn0027342	10	0.18074	0.38225	0.981312	233	3	-0.12644	0.036006	0.11752	0.982442	73	3	-0.12644
FBgn0034350	9	0.18136	0.36793	0.981312	234	3	-0.28788	0.50756	0.66837	0.989325	446	1	-0.28788
FBgn0035574	8	0.18211	0.35168	0.981312	235	3	-0.44131	0.89037	0.88998	0.990616	593	1	-0.44131
FBgn0037592	10	0.18218	0.38426	0.981312	236	2	-0.22988	0.83686	0.87751	0.990616	572	1	-0.22988
FBgn0034249	10	0.18402	0.38736	0.981312	237	3	-0.24352	0.12607	0.29686	0.982442	180	3	-0.24352
FBgn0032763	10	0.18464	0.38834	0.981312	238	2	0.13757	0.042149	0.13352	0.982442	85	5	0.13757
FBgn0046692	10	0.18464	0.38834	0.981312	239	3	-0.47712	0.11988	0.28647	0.982442	172	2	-0.47712
FBgn0036862	10	0.18791	0.39322	0.981312	240	3	-0.40811	0.48739	0.6829	0.989325	435	1	-0.40811
FBgn0029131	7	0.18828	0.35169	0.981312	241	1	0.060106	0.18367	0.34494	0.982442	240	2	0.060106
FBgn0036964	9	0.1887	0.37581	0.981312	242	3	-1.0419	0.20572	0.39554	0.982442	269	3	-1.0419
FBgn0034142	6	0.1907	0.33575	0.981312	243	1	-1.0419	0.93818	0.93813	0.994179	612	0	-1.0419
FBgn0030530	8	0.19231	0.36469	0.981312	244	2	-0.57868	0.78238	0.81373	0.989325	552	1	-0.57868
FBgn0027356	8	0.19326	0.36587	0.981312	245	3	-0.49334	0.98961	0.98952	0.999936	645	0	-0.49334
FBgn0036876	10	0.19444	0.4027	0.981312	246	3	-0.22362	0.6228	0.76311	0.989325	491	2	-0.22362
FBgn0030716	10	0.19573	0.4046	0.981312	247	2	-0.68172	0.2533	0.4696	0.98431	307	3	-0.68172
FBgn0028530	10	0.19738	0.40707	0.981312	248	2	-0.63367	0.33855	0.55244	0.984977	353	1	-0.63367
FBgn0265268	10	0.19741	0.4071	0.981312	249	3	-0.73006	0.19952	0.4103	0.982442	260	4	-0.73006
FBgn0017561	10	0.19832	0.40849	0.981312	250	1	-0.403	0.80395	0.86504	0.990616	562	1	-0.403
FBgn0030559	10	0.20239	0.41483	0.981312	251	2	-0.39122	0.10102	0.25565	0.982442	155	3	-0.39122
FBgn0034789	10	0.20348	0.41651	0.981312	252	2	0.0013193	0.13449	0.31088	0.982442	191	3	0.0013193
FBgn0027083	10	0.20443	0.41799	0.981312	253	3	-0.1996	0.25347	0.46976	0.98431	308	1	-0.1996
FBgn0037325	10	0.20443	0.41799	0.981312	254	3	-0.25742	0.44328	0.65329	0.989325	412	3	-0.25742
FBgn0030234	10	0.20507	0.41882	0.981312	255	3	-0.28983	0.63413	0.77066	0.989325	494	2	-0.28983
FBgn0038876	10	0.20541	0.41921	0.981312	256	2	0.10833	0.096723	0.24822	0.982442	152	4	0.10833
FBgn0031006	2	0.20555	0.22524	0.981312	257	1	-0.069004	0.30862	0.31461	0.982442	332	1	-0.069004
FBgn0266721	10	0.20765	0.42271	0.981312	258	3	-0.66987	0.48131	0.67967	0.989325	432	2	-0.66987
FBgn0039188	10	0.20832	0.42349	0.981312	259	2	-0.52914	0.090996	0.23857	0.982442	146	4	-0.52914
FBgn0003984	10	0.20862	0.42388	0.981312	260	2	-0.7073	0.24431	0.46074	0.982442	302	2	-0.7073
FBgn0262870	10	0.20937	0.42469	0.981312	261	3	-0.69277	0.16616	0.3608	0.982442	224	3	-0.69277
FBgn0041627	10	0.21248	0.42807	0.981312	262	2	-0.25729	0.83499	0.8768	0.990616	570	1	-0.25729
FBgn0038016	10	0.21283	0.4284	0.981312	263	3	-0.37175	0.38881	0.60154	0.989325	384	2	-0.37175
FBgn0002773	10	0.21427	0.42979	0.981312	264	2	0.072125	0.065646	0.19175	0.982442	118	4	0.072125
FBgn0034491	10	0.21478	0.43036	0.981312	265	3	-0.38666	0.52824	0.70634	0.989325	454	2	-0.38666
FBgn0038921	10	0.21499	0.43054	0.981312	266	2	-0.18723	0.72196	0.83038	0.990616	542	2	-0.18723
FBgn0033491	10	0.21625	0.43182	0.981312	267	1	-0.10434	0.0086481	0.03726	0.809785	30	2	-0.10434
FBgn0030844	10	0.21879	0.43431	0.981312	268	3	-0.043664	0.46971	0.67325	0.989325	424	2	-0.043664
FBgn0038279	10	0.22002	0.43533	0.981312	269	3	-0.57458	0.17439	0.3729	0.982442	231	2	-0.57458
FBgn0032235	10	0.22005	0.43537	0.981312	270	2	-0.19741	0.92327	0.92524	0.994179	606	1	-0.19741
FBgn0023213	10	0.22194	0.43725	0.981312	271	2	-1.0419	0.21625	0.43337	0.982442	280	1	-1.0419
FBgn0031194	10	0.22571	0.44094	0.981312	272	1	-0.53615	0.23104	0.44764	0.982442	293	3	-0.53615
FBgn0032187	10	0.22626	0.44151	0.981312	273	2	-0.54088	0.97699	0.97768	0.999135	637	0	-0.54088
FBgn0266111	10	0.22776	0.44294	0.981312	274	2	-0.67282	0.062122	0.18295	0.982442	111	2	-0.67282
FBgn0035887	10	0.22867	0.44379	0.981312	275	2	-0.054886	0.35407	0.56762	0.984977	365	3	-0.054886
FBgn0028988	10	0.22884	0.44399	0.981312	276	1	0.23857	0.038069	0.12316	0.982442	78	4	0.23857
FBgn0283442	10	0.23133	0.44651	0.981312	277	2	-0.75624	0.48057	0.67934	0.989325	431	2	-0.75624
FBgn0025781	10	0.23168	0.44689	0.981312	278	2	-0.087205	0.090294	0.23721	0.982442	144	3	-0.087205
FBgn0039015	10	0.23382	0.44899	0.981312	279	2	-0.76196	0.0020982	0.011147	0.640927	9	3	-0.76196
FBgn0052425	10	0.23506	0.45028	0.981312	280	1	-0.071442	0.15595	0.34462	0.982442	213	2	-0.071442
FBgn0036274	10	0.23954	0.45471	0.981312	281	2	-0.40522	0.1694	0.36558	0.982442	229	3	-0.40522
FBgn0030449	10	0.24106	0.45611	0.981312	282	2	-0.53238	0.19759	0.40742	0.982442	257	4	-0.53238
FBgn0020299	10	0.24124	0.45629	0.981312	283	1	0.39896	0.0051274	0.023971	0.679523	22	6	0.39896
FBgn0038541	10	0.24247	0.45743	0.981312	284	3	-0.73505	0.86691	0.89043	0.990616	584	1	-0.73505
FBgn0036044	10	0.24266	0.45767	0.981312	285	3	-0.36129	0.48284	0.68047	0.989325	434	2	-0.36129
FBgn0004657	10	0.24266	0.45767	0.981312	286	3	-0.32897	0.15595	0.34463	0.982442	214	2	-0.32897
FBgn0011754	10	0.24266	0.45767	0.981312	287	3	-1.0419	0.98843	0.98895	0.999936	643	0	-1.0419
FBgn0033860	10	0.245	0.46006	0.981312	288	2	-0.69088	0.88396	0.89968	0.990616	590	1	-0.69088
FBgn0029840	10	0.24615	0.46121	0.981312	289	2	-0.15924	0.1437	0.32527	0.982442	201	4	-0.15924
FBgn0050424	5	0.24616	0.37075	0.981312	290	2	-0.31167	0.67183	0.68117	0.989325	519	1	-0.31167
FBgn0039277	10	0.24762	0.46282	0.981312	291	3	-0.32535	0.014116	0.056516	0.895776	40	2	-0.32535
FBgn0033086	10	0.25048	0.46538	0.981312	292	2	-0.071694	0.47257	0.67478	0.989325	428	2	-0.071694
FBgn0260634	10	0.25048	0.46538	0.981312	293	3	-0.15024	0.091954	0.2402	0.982442	147	4	-0.15024
FBgn0000464	10	0.25103	0.46603	0.981312	294	3	-0.86601	0.6085	0.75407	0.989325	487	2	-0.86601
FBgn0039044	10	0.25284	0.46786	0.981312	295	3	-0.31564	0.078597	0.21751	0.982442	134	2	-0.31564
FBgn0034187	10	0.25421	0.46923	0.981312	296	3	-0.7039	0.87258	0.89369	0.990616	587	1	-0.7039
FBgn0260646	10	0.25468	0.46969	0.981312	297	3	0.071422	0.88643	0.90097	0.990616	592	1	0.071422
FBgn0028978	10	0.25535	0.47027	0.981312	298	2	0.11021	0.053412	0.16143	0.982442	102	3	0.11021
FBgn0003079	10	0.2577	0.47254	0.981312	299	3	-0.039837	0.16665	0.36156	0.982442	225	4	-0.039837
FBgn0021742	10	0.25951	0.47439	0.981312	300	2	0.13175	0.10778	0.267	0.982442	164	4	0.13175
FBgn0019940	10	0.26268	0.4774	0.981312	301	3	0.046528	0.094045	0.24364	0.982442	149	4	0.046528
FBgn0266696	10	0.26268	0.4774	0.981312	302	3	-0.14923	0.22867	0.44527	0.982442	291	2	-0.14923
FBgn0033047	10	0.26268	0.4774	0.981312	303	2	-0.51615	0.36105	0.57411	0.984977	372	2	-0.51615
FBgn0031765	10	0.2679	0.48226	0.981312	304	2	-0.76008	0.97162	0.9722	0.999135	632	0	-0.76008
FBgn0036346	10	0.26818	0.48251	0.981312	305	3	-0.28657	0.0070807	0.031382	0.731813	27	4	-0.28657
FBgn0042693	10	0.26818	0.48251	0.981312	306	2	-0.92748	0.96615	0.96683	0.999135	627	0	-0.92748
FBgn0036671	10	0.27094	0.48505	0.981312	307	2	-0.54477	0.43116	0.6417	0.989325	407	2	-0.54477
FBgn0015008	10	0.27257	0.48669	0.981312	308	3	-0.96599	0.88418	0.89986	0.990616	591	1	-0.96599
FBgn0028717	10	0.27462	0.48872	0.981312	309	2	-0.79004	0.61531	0.75856	0.989325	489	2	-0.79004
FBgn0264298	10	0.27489	0.48893	0.981312	310	3	-0.36173	0.33726	0.55132	0.984977	352	3	-0.36173
FBgn0026323	10	0.27502	0.48913	0.981312	311	2	-0.98121	0.31421	0.52837	0.984977	336	1	-0.98121
FBgn0000560	10	0.27738	0.49126	0.981312	312	1	-0.16929	0.41552	0.62701	0.989325	401	2	-0.16929
FBgn0016081	10	0.28091	0.49459	0.981312	313	3	-0.57032	0.77048	0.85427	0.990616	551	1	-0.57032
FBgn0029858	10	0.28352	0.49717	0.981312	314	3	-0.29465	0.24075	0.45723	0.982442	300	2	-0.29465
FBgn0030679	10	0.2872	0.50096	0.981312	315	2	-1.0051	0.97324	0.97372	0.999135	635	0	-1.0051
FBgn0000038	10	0.28792	0.50169	0.981312	316	3	0.14657	0.13099	0.30518	0.982442	188	4	0.14657
FBgn0042710	10	0.2884	0.50218	0.981312	317	3	-0.11934	0.32578	0.53982	0.984977	344	3	-0.11934
FBgn0264357	10	0.28887	0.50262	0.981312	318	3	0.15679	0.15466	0.34268	0.982442	212	4	0.15679
FBgn0263235	10	0.28905	0.50281	0.981312	319	2	0.2249	0.068863	0.19913	0.982442	124	5	0.2249
FBgn0039938	10	0.28908	0.50282	0.981312	320	2	0.051671	0.3158	0.52992	0.984977	338	2	0.051671
FBgn0030359	10	0.29082	0.50464	0.981312	321	2	-1.0419	0.64088	0.77488	0.989325	497	2	-1.0419
FBgn0036717	10	0.29304	0.5069	0.981312	322	2	-0.32862	0.392	0.60474	0.989325	386	2	-0.32862
FBgn0032499	10	0.29371	0.50757	0.981312	323	1	-0.2338	0.23661	0.45316	0.982442	298	3	-0.2338
FBgn0267033	8	0.29539	0.49164	0.981312	324	2	0.30161	0.01292	0.047363	0.895776	36	5	0.30161
FBgn0039270	10	0.29873	0.51248	0.981312	325	3	-0.37702	0.065098	0.19034	0.982442	117	2	-0.37702
FBgn0034029	10	0.30073	0.51451	0.981312	326	2	0.041849	0.0047151	0.022447	0.679523	21	5	0.041849
FBgn0038438	9	0.30588	0.50624	0.981312	327	2	-1.0419	0.95386	0.95274	0.999135	622	0	-1.0419
FBgn0037855	10	0.30627	0.51961	0.981312	328	2	0.34685	0.00078899	0.0044479	0.640927	3	5	0.34685
FBgn0037653	10	0.30811	0.52136	0.981312	329	2	-0.047921	0.37152	0.58408	0.986587	378	2	-0.047921
FBgn0030850	10	0.3097	0.52311	0.981312	330	2	-0.81118	0.69565	0.81163	0.989325	531	2	-0.81118
FBgn0038952	10	0.31421	0.5275	0.981312	331	2	0.26606	0.0015098	0.0080299	0.640927	7	5	0.26606
FBgn0034936	10	0.3159	0.52914	0.981312	332	1	-0.034616	0.26696	0.48247	0.984977	312	3	-0.034616
FBgn0033706	9	0.31657	0.51798	0.981312	333	3	-1.0419	0.17777	0.3652	0.982442	237	3	-1.0419
FBgn0038515	10	0.31758	0.531	0.981312	334	1	0.057269	0.082775	0.22449	0.982442	139	4	0.057269
FBgn0024248	8	0.31761	0.51117	0.981312	335	1	-0.10577	0.27012	0.46152	0.982442	313	1	-0.10577
FBgn0028902	10	0.31768	0.53112	0.981312	336	3	-0.2445	0.18922	0.39561	0.982442	246	2	-0.2445
FBgn0010501	10	0.31958	0.53286	0.981312	337	3	-0.3059	0.04453	0.13962	0.982442	88	2	-0.3059
FBgn0024698	9	0.32178	0.52376	0.981312	338	2	-0.30375	0.37489	0.58177	0.985781	380	3	-0.30375
FBgn0031869	10	0.32257	0.53595	0.981312	339	2	-0.20616	0.13476	0.31131	0.982442	193	4	-0.20616
FBgn0034363	10	0.32316	0.53644	0.981312	340	2	-1.0419	0.073628	0.20861	0.982442	130	2	-1.0419
FBgn0037889	10	0.32339	0.53661	0.981312	341	3	-0.14878	0.16924	0.3654	0.982442	228	3	-0.14878
FBgn0040297	10	0.3253	0.53869	0.981312	342	3	-0.15799	0.83201	0.87573	0.990616	569	1	-0.15799
FBgn0035249	10	0.32537	0.53878	0.981312	343	1	-0.020972	0.11723	0.28191	0.982442	170	4	-0.020972
FBgn0083141	10	0.32769	0.54093	0.981312	344	3	-0.18529	0.53224	0.70854	0.989325	458	1	-0.18529
FBgn0034173	10	0.33025	0.54332	0.981312	345	2	0.039377	0.056497	0.16934	0.982442	105	4	0.039377
FBgn0036398	10	0.33056	0.54358	0.981312	346	3	-0.45535	0.61094	0.75558	0.989325	488	2	-0.45535
FBgn0011474	10	0.33086	0.54389	0.981312	347	2	-0.16668	0.029631	0.10067	0.982442	66	3	-0.16668
FBgn0033677	6	0.33167	0.47338	0.981312	348	1	-0.34375	0.79926	0.79877	0.989325	559	1	-0.34375
FBgn0028397	10	0.33199	0.54493	0.981312	349	2	-0.0054086	0.0023653	0.012493	0.640927	11	4	-0.0054086
FBgn0004050	10	0.33438	0.54766	0.981312	350	3	-0.27588	0.67185	0.79501	0.989325	520	1	-0.27588
FBgn0039049	10	0.33582	0.54924	0.981312	351	3	-0.81614	0.84749	0.88207	0.990616	575	1	-0.81614
FBgn0034700	10	0.33691	0.55029	0.981312	352	2	-0.39748	0.49598	0.68745	0.989325	441	1	-0.39748
FBgn0052633	10	0.33691	0.55029	0.981312	353	1	-0.051886	0.23506	0.4517	0.982442	296	3	-0.051886
FBgn0036428	10	0.33964	0.55287	0.981312	354	1	-0.51967	0.35782	0.57108	0.984977	368	2	-0.51967
FBgn0033574	10	0.34206	0.55509	0.981312	355	3	-0.12757	0.57132	0.73169	0.989325	474	1	-0.12757
FBgn0265193	10	0.34206	0.55509	0.981312	356	3	-0.37128	0.59964	0.74896	0.989325	482	2	-0.37128
FBgn0037606	10	0.34252	0.5556	0.981312	357	2	-0.41111	0.19573	0.4047	0.982442	255	1	-0.41111
FBgn0030710	10	0.34313	0.55626	0.981312	358	2	-0.29085	0.91568	0.9194	0.994179	600	1	-0.29085
FBgn0015039	10	0.34559	0.55877	0.981312	359	2	0.16512	0.027283	0.094869	0.966482	64	3	0.16512
FBgn0264340	10	0.34613	0.55918	0.981312	360	2	-0.04756	0.039531	0.12684	0.982442	80	2	-0.04756
FBgn0052568	10	0.34613	0.55918	0.981312	361	2	-0.90204	0.17207	0.36957	0.982442	230	2	-0.90204
FBgn0032223	10	0.34638	0.55939	0.981312	362	3	-0.096633	0.34638	0.55998	0.984977	360	3	-0.096633
FBgn0005592	10	0.34974	0.56294	0.981312	363	3	-0.37902	0.94136	0.94198	0.994179	615	0	-0.37902
FBgn0004118	10	0.35119	0.5643	0.981312	364	3	-0.28133	0.98478	0.98549	0.999936	640	0	-0.28133
FBgn0035823	10	0.35167	0.56479	0.981312	365	3	-0.14706	0.028822	0.09858	0.982442	65	3	-0.14706
FBgn0036659	10	0.35232	0.56549	0.981312	366	2	0.08188	0.45549	0.66502	0.989325	420	3	0.08188
FBgn0032749	10	0.35256	0.56576	0.981312	367	2	-0.67451	0.29831	0.51311	0.984977	328	2	-0.67451
FBgn0031875	10	0.35263	0.56582	0.981312	368	3	-0.14226	0.19313	0.40108	0.982442	252	2	-0.14226
FBgn0038485	10	0.35354	0.5666	0.981312	369	3	0.082085	0.058969	0.17535	0.982442	109	5	0.082085
FBgn0052333	10	0.35416	0.56714	0.981312	370	1	-0.29113	0.48171	0.67994	0.989325	433	2	-0.29113
FBgn0004507	10	0.356	0.5689	0.981312	371	3	-0.14369	0.58941	0.74269	0.989325	478	2	-0.14369
FBgn0024222	10	0.35788	0.57062	0.981312	372	1	0.097227	0.13474	0.31128	0.982442	192	4	0.097227
FBgn0014366	10	0.36105	0.57362	0.981312	373	2	0.12644	0.041608	0.13187	0.982442	84	4	0.12644
FBgn0035983	10	0.3613	0.57385	0.981312	374	3	-0.18933	0.59291	0.74494	0.989325	479	2	-0.18933
FBgn0050156	10	0.36178	0.57438	0.981312	375	3	-0.25329	0.19088	0.39799	0.982442	248	3	-0.25329
FBgn0266084	10	0.36251	0.57494	0.981312	376	3	-0.2012	0.17727	0.37724	0.982442	235	3	-0.2012
FBgn0250823	10	0.36421	0.57662	0.981614	377	2	-0.55937	0.07772	0.21588	0.982442	133	4	-0.55937
FBgn0037880	10	0.36735	0.57981	0.982276	378	2	-0.078903	0.31534	0.52952	0.984977	337	2	-0.078903
FBgn0052383	10	0.36839	0.5807	0.982276	379	1	-1.0419	0.056145	0.16852	0.982442	104	3	-1.0419
FBgn0036323	8	0.37252	0.55019	0.981312	380	1	-0.34564	0.55855	0.69501	0.989325	469	2	-0.34564
FBgn0052196	7	0.37394	0.52986	0.981312	381	2	-0.13212	0.37286	0.52976	0.984977	379	1	-0.13212
FBgn0031653	10	0.37427	0.5864	0.982276	382	2	0.080268	0.35889	0.57224	0.984977	369	3	0.080268
FBgn0267339	10	0.37518	0.58722	0.982276	383	2	-1.0419	0.69161	0.80885	0.989325	528	2	-1.0419
FBgn0000565	10	0.37868	0.59085	0.982276	384	3	-0.36927	0.4725	0.67472	0.989325	427	2	-0.36927
FBgn0053506	10	0.37876	0.5909	0.982276	385	1	-0.20973	0.51088	0.69624	0.989325	448	2	-0.20973
FBgn0033980	10	0.38081	0.59308	0.982276	386	1	-0.18783	0.72987	0.8361	0.990616	545	2	-0.18783
FBgn0036962	10	0.38286	0.5951	0.982276	387	1	0.051973	0.18045	0.38191	0.982442	238	2	0.051973
FBgn0031183	10	0.38518	0.59763	0.982276	388	2	-0.32683	0.048626	0.14954	0.982442	92	3	-0.32683
FBgn0041191	10	0.38737	0.59998	0.982276	389	3	-0.070371	0.36087	0.57396	0.984977	371	2	-0.070371
FBgn0030018	8	0.38824	0.56133	0.981312	390	2	-0.092759	0.35207	0.53703	0.984977	363	2	-0.092759
FBgn0039043	10	0.38882	0.60129	0.982276	391	3	-0.3385	0.42159	0.63258	0.989325	403	2	-0.3385
FBgn0030539	10	0.39124	0.60372	0.982276	392	3	-0.092423	0.48955	0.68412	0.989325	437	2	-0.092423
FBgn0039710	10	0.393	0.60543	0.982276	393	2	-0.29996	0.90459	0.91205	0.994179	595	1	-0.29996
FBgn0041164	10	0.39341	0.60584	0.982276	394	3	0.082298	0.13978	0.31935	0.982442	197	4	0.082298
FBgn0003483	10	0.39341	0.60584	0.982276	395	3	-0.35891	0.8453	0.88109	0.990616	574	1	-0.35891
FBgn0029999	7	0.39444	0.54675	0.981312	396	2	-0.64941	0.66854	0.73092	0.989325	515	1	-0.64941
FBgn0031610	10	0.39607	0.60849	0.982276	397	3	-0.29745	0.44059	0.65083	0.989325	409	1	-0.29745
FBgn0033569	10	0.39966	0.61182	0.982276	398	2	-0.12702	0.16698	0.36197	0.982442	226	4	-0.12702
FBgn0051624	7	0.40124	0.55218	0.981312	399	2	-0.3968	0.47218	0.61491	0.989325	426	2	-0.3968
FBgn0266411	10	0.40236	0.61433	0.982276	400	2	0.042736	0.035329	0.11571	0.982442	72	3	0.042736
FBgn0035709	10	0.40399	0.61598	0.982276	401	1	-0.018017	0.66513	0.79056	0.989325	513	2	-0.018017
FBgn0040068	10	0.40506	0.61714	0.982276	402	2	-1.0419	0.97288	0.97343	0.999135	634	0	-1.0419
FBgn0029722	10	0.40686	0.61871	0.982276	403	2	-1.0419	0.22383	0.44069	0.982442	286	2	-1.0419
FBgn0029067	10	0.41432	0.62577	0.982276	404	2	-0.18166	0.59571	0.74664	0.989325	480	2	-0.18166
FBgn0040370	10	0.42414	0.63476	0.982276	405	2	-0.14685	0.51194	0.69688	0.989325	449	1	-0.14685
FBgn0052451	10	0.42414	0.63476	0.982276	406	2	-0.03189	0.1262	0.2971	0.982442	181	3	-0.03189
FBgn0265137	10	0.42414	0.63476	0.982276	407	2	-0.54166	0.56014	0.72456	0.989325	470	2	-0.54166
FBgn0030623	10	0.42414	0.63476	0.982276	408	2	0.13978	0.095122	0.24556	0.982442	150	3	0.13978
FBgn0024332	8	0.43358	0.59559	0.982276	409	1	-1.0419	0.71565	0.78183	0.989325	540	1	-1.0419
FBgn0033473	10	0.43401	0.64443	0.982276	410	2	-0.38346	0.75911	0.85075	0.990616	548	1	-0.38346
FBgn0032717	10	0.43965	0.64988	0.982276	411	1	-0.10497	0.075446	0.21168	0.982442	132	3	-0.10497
FBgn0032304	10	0.4436	0.65362	0.982276	412	2	-0.0067288	0.0040706	0.019884	0.671452	19	4	-0.0067288
FBgn0038890	10	0.44418	0.65413	0.982276	413	2	-0.37801	0.033425	0.1108	0.982442	70	3	-0.37801
FBgn0033113	10	0.44525	0.65529	0.982276	414	2	-0.052392	0.27125	0.48646	0.984977	314	2	-0.052392
FBgn0000259	9	0.44708	0.62817	0.982276	415	2	0.14104	0.37003	0.57606	0.984977	377	3	0.14104
FBgn0033471	10	0.4508	0.66043	0.982276	416	1	-0.096263	0.31396	0.52818	0.984977	333	3	-0.096263
FBgn0036187	10	0.45236	0.66197	0.982276	417	2	-0.4513	0.5306	0.70776	0.989325	455	2	-0.4513
FBgn0030620	10	0.4541	0.66329	0.982276	418	2	0.24166	0.019857	0.074802	0.913267	49	5	0.24166
FBgn0031126	10	0.45526	0.66395	0.982276	419	2	-0.31115	0.19826	0.40848	0.982442	258	2	-0.31115
FBgn0050429	10	0.45539	0.66403	0.982276	420	2	-0.14044	0.68297	0.80284	0.989325	526	1	-0.14044
FBgn0035533	10	0.45614	0.66439	0.982276	421	2	-0.60363	0.45286	0.6625	0.989325	419	3	-0.60363
FBgn0031214	10	0.45766	0.66512	0.982276	422	2	-0.70386	0.16716	0.36218	0.982442	227	3	-0.70386
FBgn0020412	10	0.45817	0.66538	0.982276	423	2	0.057786	0.60187	0.75017	0.989325	483	2	0.057786
FBgn0039941	10	0.45903	0.66584	0.982276	424	2	0.19781	0.023668	0.085608	0.913267	58	5	0.19781
FBgn0037536	10	0.46395	0.66855	0.982276	425	2	-0.32284	0.64549	0.77796	0.989325	500	2	-0.32284
FBgn0027101	10	0.46453	0.66883	0.982276	426	2	-1.0106	0.79465	0.86204	0.990616	556	1	-1.0106
FBgn0038331	10	0.46893	0.671	0.982276	427	1	-0.52787	0.10251	0.2581	0.982442	156	3	-0.52787
FBgn0030342	10	0.46893	0.671	0.982276	428	2	-0.10716	0.084234	0.22684	0.982442	140	3	-0.10716
FBgn0038017	10	0.47205	0.67268	0.982276	429	1	0.39406	0.013252	0.053696	0.895776	37	6	0.39406
FBgn0025807	10	0.47205	0.67268	0.982276	430	2	-0.71156	0.12706	0.29854	0.982442	184	1	-0.71156
FBgn0031972	10	0.47257	0.67299	0.982276	431	2	-0.60634	0.38592	0.59865	0.989325	383	1	-0.60634
FBgn0031187	10	0.47601	0.67493	0.982276	432	2	-0.49013	0.19414	0.40254	0.982442	254	3	-0.49013
FBgn0032381	10	0.47604	0.67494	0.982276	433	2	-0.10212	0.014116	0.056516	0.895776	39	3	-0.10212
FBgn0038979	10	0.48228	0.67844	0.982276	434	2	0.26769	0.062264	0.18336	0.982442	112	5	0.26769
FBgn0037248	10	0.48392	0.67923	0.982276	435	1	-1.0419	0.72758	0.83435	0.990616	543	1	-1.0419
FBgn0019890	10	0.48609	0.68058	0.982276	436	2	-0.19598	0.24808	0.46456	0.983421	305	3	-0.19598
FBgn0039115	10	0.4871	0.68099	0.982276	437	2	-0.33526	0.3511	0.56478	0.984977	362	2	-0.33526
FBgn0036480	7	0.48721	0.62772	0.982276	438	1	-1.0419	0.86309	0.86292	0.990616	582	0	-1.0419
FBgn0032691	8	0.49413	0.64231	0.982276	439	2	-0.91571	0.69796	0.77467	0.989325	532	1	-0.91571
FBgn0037657	10	0.49415	0.6847	0.982276	440	2	-1.0178	0.90924	0.91521	0.994179	598	1	-1.0178
FBgn0030789	8	0.49635	0.6441	0.982276	441	1	-0.50354	0.66114	0.76093	0.989325	509	1	-0.50354
FBgn0017572	10	0.4964	0.68601	0.982276	442	2	-0.20557	0.6728	0.79557	0.989325	521	2	-0.20557
FBgn0002174	10	0.49892	0.68764	0.982276	443	2	-0.43951	0.71168	0.82296	0.990616	538	2	-0.43951
FBgn0030680	10	0.50695	0.69254	0.982276	444	2	-0.30765	0.92327	0.92524	0.994179	605	1	-0.30765
FBgn0026317	10	0.50861	0.69342	0.982276	445	1	-0.16186	0.20624	0.4205	0.982442	270	2	-0.16186
FBgn0039241	10	0.51144	0.69504	0.982276	446	2	0.12262	0.32697	0.54101	0.984977	346	3	0.12262
FBgn0262103	10	0.51887	0.69942	0.982276	447	2	-0.18624	0.3172	0.53144	0.984977	339	3	-0.18624
FBgn0037516	10	0.51933	0.69975	0.982276	448	1	-0.22764	0.20477	0.41846	0.982442	267	1	-0.22764
FBgn0005775	10	0.52243	0.7016	0.982276	449	2	-0.34804	0.069546	0.20068	0.982442	125	4	-0.34804
FBgn0036206	10	0.5268	0.70404	0.982276	450	2	-0.34816	0.28352	0.4982	0.984977	318	3	-0.34816
FBgn0027492	10	0.52703	0.70415	0.982276	451	1	-1.0419	0.97656	0.97723	0.999135	636	0	-1.0419
FBgn0051852	10	0.53087	0.70645	0.982276	452	2	-0.57911	0.32902	0.54283	0.984977	348	2	-0.57911
FBgn0283499	10	0.53462	0.7084	0.982276	453	1	-0.10106	0.21129	0.4283	0.982442	274	2	-0.10106
FBgn0083961	10	0.53734	0.71001	0.982276	454	2	-0.01338	0.020877	0.077642	0.913267	52	5	-0.01338
FBgn0032871	10	0.53857	0.71068	0.982276	455	2	-0.24516	0.66178	0.7884	0.989325	510	2	-0.24516
FBgn0053096	10	0.54014	0.71169	0.982276	456	1	0.24787	0.033423	0.11079	0.982442	69	5	0.24787
FBgn0015570	8	0.54184	0.68148	0.982276	457	2	-1.0419	0.99984	0.99978	0.999936	651	0	-1.0419
FBgn0260645	9	0.54343	0.69252	0.982276	458	1	-0.25501	0.1477	0.32643	0.982442	205	1	-0.25501
FBgn0000289	10	0.54754	0.71583	0.982276	459	1	-0.75684	0.82572	0.87346	0.990616	566	1	-0.75684
FBgn0001217	10	0.5557	0.72049	0.982276	460	2	-0.096604	0.32769	0.54172	0.984977	347	3	-0.096604
FBgn0038705	10	0.55701	0.72132	0.982276	461	2	0.033431	0.34158	0.55522	0.984977	356	3	0.033431
FBgn0259977	10	0.55701	0.72132	0.982276	462	2	0.21565	0.066583	0.19396	0.982442	120	4	0.21565
FBgn0030460	2	0.5571	0.55626	0.981312	463	0	-0.44492	0.47515	0.4747	0.98431	429	0	-0.44492
FBgn0264574	10	0.55712	0.72138	0.982276	464	1	-0.6879	0.35018	0.56393	0.984977	361	2	-0.6879
FBgn0026379	10	0.56089	0.72371	0.982276	465	2	0.13473	0.166	0.36043	0.982442	222	4	0.13473
FBgn0029870	10	0.56277	0.72474	0.982276	466	2	-0.41955	0.32648	0.54053	0.984977	345	2	-0.41955
FBgn0029672	8	0.56463	0.69964	0.982276	467	2	0.1333	0.28341	0.47706	0.98431	317	2	0.1333
FBgn0039747	10	0.56615	0.72707	0.982276	468	2	0.15085	0.42647	0.63705	0.989325	405	3	0.15085
FBgn0038167	10	0.57184	0.73093	0.982276	469	2	-1.0019	0.050134	0.15321	0.982442	95	1	-1.0019
FBgn0266064	10	0.57352	0.73181	0.982276	470	1	-0.70768	0.86626	0.89017	0.990616	583	1	-0.70768
FBgn0001089	10	0.57425	0.7322	0.982276	471	1	0.49115	0.012396	0.050391	0.895776	34	6	0.49115
FBgn0036018	10	0.57646	0.73349	0.982276	472	2	-1.039	0.60675	0.75299	0.989325	486	1	-1.039
FBgn0035995	10	0.57646	0.73349	0.982276	473	2	-0.26736	0.21879	0.43585	0.982442	283	1	-0.26736
FBgn0038721	10	0.58043	0.73612	0.982276	474	1	-0.96281	0.54377	0.71502	0.989325	464	2	-0.96281
FBgn0003731	10	0.58224	0.73743	0.982276	475	1	0.073021	0.11949	0.28592	0.982442	171	4	0.073021
FBgn0033397	10	0.58258	0.73773	0.982276	476	2	-0.16574	0.17738	0.37736	0.982442	236	3	-0.16574
FBgn0035059	10	0.58487	0.73906	0.982276	477	2	-0.20528	0.53976	0.71275	0.989325	462	2	-0.20528
FBgn0035508	10	0.58511	0.73917	0.982276	478	1	-0.020777	0.19326	0.40131	0.982442	253	2	-0.020777
FBgn0003132	10	0.59267	0.74377	0.982276	479	2	0.092881	0.0011523	0.0062191	0.640927	6	4	0.092881
FBgn0037140	10	0.59666	0.74626	0.982276	480	2	-0.1268	0.31863	0.53291	0.984977	341	3	-0.1268
FBgn0260768	10	0.59666	0.74626	0.982276	481	2	-0.90529	0.62996	0.76771	0.989325	492	2	-0.90529
FBgn0050428	10	0.60236	0.74955	0.982276	482	2	-0.33063	0.5197	0.70156	0.989325	451	2	-0.33063
FBgn0263600	10	0.60409	0.75076	0.982276	483	2	-0.23969	0.29544	0.51036	0.984977	327	3	-0.23969
FBgn0063667	10	0.60675	0.75221	0.982276	484	2	-0.37251	0.65618	0.7848	0.989325	507	1	-0.37251
FBgn0040098	10	0.60913	0.75358	0.982276	485	1	-1.0419	0.82175	0.87188	0.990616	564	1	-1.0419
FBgn0036118	10	0.6124	0.7558	0.982276	486	2	-0.14638	0.47114	0.6741	0.989325	425	2	-0.14638
FBgn0270924	10	0.61337	0.7565	0.982276	487	2	-0.11118	0.045603	0.14253	0.982442	89	1	-0.11118
FBgn0024996	10	0.61385	0.75688	0.982276	488	2	-0.22858	0.29486	0.50967	0.984977	323	2	-0.22858
FBgn0036271	10	0.61531	0.75783	0.982276	489	2	-0.41446	0.68937	0.80736	0.989325	527	1	-0.41446
FBgn0039421	10	0.61851	0.75985	0.982276	490	1	-0.14497	0.91943	0.92232	0.994179	602	1	-0.14497
FBgn0025115	10	0.62156	0.76159	0.982276	491	2	-0.38684	0.12985	0.3032	0.982442	186	4	-0.38684
FBgn0003140	10	0.62156	0.76159	0.982276	492	2	-0.44366	0.14068	0.3206	0.982442	198	3	-0.44366
FBgn0037504	10	0.62477	0.7635	0.982276	493	1	0.16061	0.059899	0.17761	0.982442	110	5	0.16061
FBgn0267435	10	0.62633	0.76457	0.982276	494	2	-0.29218	0.5036	0.69227	0.989325	445	2	-0.29218
FBgn0004463	10	0.62681	0.76485	0.982276	495	2	-0.27625	0.051374	0.15638	0.982442	98	4	-0.27625
FBgn0267912	10	0.62823	0.7658	0.982276	496	2	-0.26974	0.052392	0.15875	0.982442	100	4	-0.26974
FBgn0030992	10	0.6287	0.76607	0.982276	497	2	-0.22751	0.32427	0.53845	0.984977	343	1	-0.22751
FBgn0015279	9	0.63054	0.755	0.982276	498	1	-0.11324	0.65921	0.77698	0.989325	508	2	-0.11324
FBgn0000273	10	0.63341	0.76957	0.982276	499	2	0.0093771	0.36902	0.58161	0.985781	375	3	0.0093771
FBgn0259190	10	0.63381	0.76985	0.982276	500	1	0.3308	0.0071195	0.031501	0.731813	28	5	0.3308
FBgn0033095	10	0.63482	0.77046	0.982276	501	2	-0.19811	0.94087	0.94142	0.994179	614	0	-0.19811
FBgn0265042	10	0.63576	0.77105	0.982276	502	2	-0.028336	0.00016258	0.0010835	0.353226	2	5	-0.028336
FBgn0030840	10	0.63995	0.77372	0.982276	503	2	-0.12313	0.22727	0.44385	0.982442	289	3	-0.12313
FBgn0035496	10	0.64204	0.77511	0.982276	504	1	-0.10633	0.30203	0.5166	0.984977	329	3	-0.10633
FBgn0034265	10	0.64365	0.77617	0.982276	505	2	0.21962	0.023919	0.086191	0.913267	59	5	0.21962
FBgn0025549	10	0.64892	0.77956	0.982276	506	2	-0.31082	0.34302	0.5568	0.984977	357	3	-0.31082
FBgn0003892	10	0.65415	0.78302	0.982276	507	2	0.10728	0.14859	0.33301	0.982442	206	4	0.10728
FBgn0014859	10	0.6546	0.78337	0.982276	508	2	-0.41934	0.63106	0.7685	0.989325	493	2	-0.41934
FBgn0015295	10	0.65829	0.78572	0.982276	509	1	0.23234	0.10588	0.26402	0.982442	162	4	0.23234
FBgn0050293	10	0.65979	0.78674	0.982276	510	2	0.074423	0.19184	0.39941	0.982442	249	4	0.074423
FBgn0000382	10	0.66	0.78685	0.982276	511	2	0.1127	0.022677	0.082817	0.913267	57	4	0.1127
FBgn0030793	10	0.66044	0.78711	0.982276	512	2	0.20685	0.1618	0.35388	0.982442	219	4	0.20685
FBgn0041184	10	0.66089	0.78737	0.982276	513	2	-0.12485	0.56459	0.72727	0.989325	472	2	-0.12485
FBgn0033020	5	0.66383	0.67484	0.982276	514	1	-0.93323	0.37724	0.50548	0.984977	381	1	-0.93323
FBgn0010379	10	0.67237	0.79505	0.982276	515	2	-0.39183	0.50191	0.69123	0.989325	444	1	-0.39183
FBgn0002774	10	0.67519	0.79699	0.982276	516	2	-0.51594	0.041052	0.13056	0.982442	83	2	-0.51594
FBgn0033504	10	0.67519	0.79699	0.982276	517	2	-0.093987	0.44065	0.65087	0.989325	410	3	-0.093987
FBgn0039650	10	0.67617	0.79774	0.982276	518	1	0.17863	0.70543	0.81847	0.990059	536	2	0.17863
FBgn0267698	10	0.67628	0.79782	0.982276	519	2	-0.22077	0.66982	0.79362	0.989325	516	1	-0.22077
FBgn0003719	10	0.67731	0.79855	0.982276	520	1	0.28066	0.0039393	0.01933	0.671452	18	5	0.28066
FBgn0050020	10	0.68157	0.8015	0.982276	521	1	0.18528	0.22759	0.4442	0.982442	290	2	0.18528
FBgn0000274	10	0.68337	0.80281	0.982276	522	2	0.07585	0.12636	0.29745	0.982442	182	4	0.07585
FBgn0263656	10	0.68337	0.80281	0.982276	523	2	-0.088653	0.69951	0.81449	0.989325	533	2	-0.088653
FBgn0013672	10	0.68688	0.80534	0.982276	524	1	-0.39373	0.45034	0.6599	0.989325	417	1	-0.39373
FBgn0040377	10	0.6874	0.80564	0.982276	525	2	-0.26012	0.54564	0.71602	0.989325	465	2	-0.26012
FBgn0015269	10	0.6874	0.80564	0.982276	526	2	-0.30074	0.30596	0.5202	0.984977	331	2	-0.30074
FBgn0039098	10	0.68825	0.80618	0.982276	527	2	0.12126	0.29489	0.50974	0.984977	324	3	0.12126
FBgn0028563	10	0.68993	0.80752	0.982276	528	2	-0.41532	0.92975	0.93044	0.994179	608	1	-0.41532
FBgn0020224	9	0.69	0.79779	0.982276	529	1	-0.058142	0.17683	0.36423	0.982442	234	1	-0.058142
FBgn0015582	9	0.69	0.79779	0.982276	530	1	-0.2287	0.65383	0.77272	0.989325	505	2	-0.2287
FBgn0037370	8	0.69484	0.77195	0.982276	531	1	0.051368	0.079675	0.20218	0.982442	135	2	0.051368
FBgn0050268	10	0.69808	0.81319	0.982616	532	1	-0.13977	0.047115	0.14629	0.982442	91	2	-0.13977
FBgn0051719	6	0.70025	0.72085	0.982276	533	1	-0.18134	0.65612	0.69464	0.989325	506	1	-0.18134
FBgn0028427	10	0.7042	0.81773	0.982616	534	1	-0.18113	0.087438	0.23221	0.982442	143	4	-0.18113
FBgn0003256	10	0.70473	0.81797	0.982616	535	1	-1.0419	0.12005	0.28672	0.982442	173	2	-1.0419
FBgn0031216	6	0.70644	0.72482	0.982276	536	1	-1.0419	0.64508	0.68811	0.989325	499	1	-1.0419
FBgn0030293	10	0.70682	0.8192	0.982616	537	1	0.03987	0.31396	0.52818	0.984977	335	3	0.03987
FBgn0029834	10	0.70735	0.81951	0.982616	538	1	0.2655	0.019682	0.074317	0.913267	48	5	0.2655
FBgn0266347	9	0.71256	0.80498	0.982276	539	1	-0.049119	0.043111	0.13401	0.982442	86	4	-0.049119
FBgn0032820	10	0.72015	0.82913	0.982616	540	1	-0.72056	0.97194	0.97247	0.999135	633	0	-0.72056
FBgn0260779	10	0.73746	0.84165	0.982616	541	1	0.24338	0.125	0.2952	0.982442	179	4	0.24338
FBgn0015300	10	0.74052	0.84368	0.982616	542	1	-0.3126	0.0242	0.086844	0.913267	61	3	-0.3126
FBgn0036039	10	0.74192	0.84417	0.982616	543	1	0.016213	0.17654	0.37604	0.982442	233	4	0.016213
FBgn0037672	10	0.74378	0.84464	0.982616	544	1	-0.069176	0.15188	0.3384	0.982442	208	2	-0.069176
FBgn0025469	10	0.74586	0.84521	0.982616	545	1	-0.05156	0.96826	0.9689	0.999135	629	0	-0.05156
FBgn0039623	10	0.74975	0.84633	0.982616	546	1	0.33477	0.002996	0.015649	0.640927	15	6	0.33477
FBgn0028562	10	0.75691	0.84833	0.982616	547	1	-0.053367	0.064199	0.18808	0.982442	115	5	-0.053367
FBgn0020621	10	0.76303	0.85027	0.982616	548	1	0.026211	0.10492	0.26226	0.982442	160	4	0.026211
FBgn0033889	10	0.77195	0.85303	0.982616	549	1	-0.0334	0.17562	0.37473	0.982442	232	3	-0.0334
FBgn0039796	10	0.77278	0.85326	0.982616	550	1	0.11155	0.1622	0.35451	0.982442	220	3	0.11155
FBgn0038524	10	0.77444	0.85377	0.982616	551	1	-0.025646	0.0073714	0.03255	0.731813	29	4	-0.025646
FBgn0032650	10	0.77608	0.85431	0.982616	552	1	-0.63939	0.39845	0.61102	0.989325	387	3	-0.63939
FBgn0036282	8	0.78122	0.81206	0.982616	553	1	-1.0419	0.40648	0.57628	0.984977	393	2	-1.0419
FBgn0036165	9	0.78241	0.83195	0.982616	554	1	0.60026	0.0008031	0.0043885	0.640927	4	6	0.60026
FBgn0033192	10	0.78257	0.85629	0.982616	555	1	-0.18417	0.10873	0.26847	0.982442	166	3	-0.18417
FBgn0012058	10	0.78257	0.85629	0.982616	556	1	-0.75492	0.96645	0.96722	0.999135	628	0	-0.75492
FBgn0022213	10	0.78257	0.85629	0.982616	557	1	0.20938	0.021701	0.080205	0.913267	54	5	0.20938
FBgn0024754	10	0.79082	0.85915	0.982616	558	1	0.23804	0.0026207	0.013908	0.640927	13	4	0.23804
FBgn0035082	10	0.79408	0.86032	0.982616	559	1	0.028439	0.19277	0.40066	0.982442	250	3	0.028439
FBgn0002413	10	0.80027	0.86229	0.982616	560	1	0.12988	0.10608	0.26431	0.982442	163	4	0.12988
FBgn0262733	10	0.80064	0.8625	0.982616	561	1	0.024704	0.40206	0.61416	0.989325	390	2	0.024704
FBgn0029661	4	0.80384	0.80484	0.982276	562	0	-0.0042064	0.83038	0.83184	0.990616	567	0	-0.0042064
FBgn0030805	4	0.80384	0.80484	0.982276	563	0	-0.31403	0.072022	0.1434	0.982442	128	2	-0.31403
FBgn0034381	10	0.80413	0.86359	0.982616	564	1	0.3376	0.0066278	0.02976	0.731813	26	6	0.3376
FBgn0053116	7	0.80476	0.81169	0.982616	565	1	-0.29206	0.34417	0.50574	0.984977	358	1	-0.29206
FBgn0033733	10	0.80522	0.86399	0.982616	566	1	-0.26794	0.96508	0.96573	0.999135	626	0	-0.26794
FBgn0031561	9	0.80822	0.84283	0.982616	567	1	-0.30831	0.16238	0.34771	0.982442	221	3	-0.30831
FBgn0265089	10	0.8097	0.86567	0.982616	568	1	-0.22975	0.65254	0.78251	0.989325	502	1	-0.22975
FBgn0038598	10	0.81041	0.86594	0.982616	569	1	0.59538	0.0037327	0.018568	0.671452	17	6	0.59538
FBgn0038830	10	0.81181	0.86639	0.982616	570	1	-0.29454	0.18668	0.39151	0.982442	243	4	-0.29454
FBgn0031042	10	0.82007	0.86965	0.982616	571	1	0.14656	0.122	0.29001	0.982442	174	3	0.14656
FBgn0033266	10	0.82441	0.87164	0.982616	572	1	0.36716	0.0028028	0.014778	0.640927	14	7	0.36716
FBgn0037625	10	0.8267	0.87247	0.982616	573	1	0.035183	0.014181	0.056783	0.895776	41	4	0.035183
FBgn0037492	10	0.83137	0.8742	0.982616	574	1	-0.19241	0.079877	0.21963	0.982442	136	3	-0.19241
FBgn0266667	10	0.8328	0.87463	0.982616	575	1	-1.0419	0.4185	0.62964	0.989325	402	2	-1.0419
FBgn0035483	10	0.83824	0.8769	0.982616	576	1	0.13011	0.13955	0.31896	0.982442	195	2	0.13011
FBgn0041789	10	0.84278	0.87874	0.982616	577	1	-0.38355	0.54297	0.71456	0.989325	463	2	-0.38355
FBgn0036932	10	0.84278	0.87874	0.982616	578	1	-0.17478	0.90208	0.91029	0.994179	594	1	-0.17478
FBgn0015765	10	0.84397	0.87935	0.982616	579	1	-0.32078	0.20483	0.41856	0.982442	268	4	-0.32078
FBgn0050495	10	0.85037	0.88224	0.982616	580	1	0.15151	0.0021388	0.011305	0.640927	10	4	0.15151
FBgn0039782	10	0.85831	0.88578	0.982616	581	1	-0.34776	0.64204	0.77567	0.989325	498	1	-0.34776
FBgn0031441	10	0.86287	0.88775	0.982616	582	1	-0.12403	0.76064	0.85131	0.990616	549	1	-0.12403
FBgn0038247	10	0.86458	0.88844	0.982616	583	1	0.38899	0.0065862	0.029591	0.731813	25	6	0.38899
FBgn0035336	10	0.86497	0.88864	0.982616	584	1	0.026246	0.046019	0.14353	0.982442	90	3	0.026246
FBgn0039305	10	0.86575	0.88908	0.982616	585	1	0.155	0.050214	0.1534	0.982442	96	2	0.155
FBgn0001974	5	0.86945	0.86943	0.982616	586	0	-0.050681	0.19828	0.31767	0.982442	259	2	-0.050681
FBgn0037764	10	0.87034	0.89161	0.982616	587	1	0.13881	0.46337	0.67	0.989325	422	2	0.13881
FBgn0250819	10	0.8727	0.89283	0.982616	588	1	-0.39278	0.10414	0.26092	0.982442	157	3	-0.39278
FBgn0030956	10	0.87479	0.89381	0.982616	589	1	-0.31626	0.39852	0.61111	0.989325	388	1	-0.31626
FBgn0259146	10	0.87551	0.89421	0.982616	590	1	-0.00063221	0.21196	0.42903	0.982442	275	3	-0.00063221
FBgn0036156	10	0.87696	0.89503	0.982616	591	1	-0.17526	0.53815	0.71182	0.989325	461	2	-0.17526
FBgn0053100	10	0.88754	0.90079	0.98504	592	1	-0.0079845	0.152	0.33859	0.982442	209	4	-0.0079845
FBgn0028847	10	0.8882	0.90117	0.98504	593	1	-0.27613	0.44664	0.65656	0.989325	415	2	-0.27613
FBgn0037327	9	0.88974	0.89089	0.982616	594	1	-0.20517	0.97776	0.97637	0.999135	638	0	-0.20517
FBgn0264075	9	0.89231	0.89304	0.982616	595	1	-0.35311	0.36011	0.56556	0.984977	370	3	-0.35311
FBgn0005198	3	0.89533	0.89521	0.982616	596	0	0.18073	0.59592	0.5952	0.989325	481	0	0.18073
FBgn0267487	10	0.89607	0.9059	0.98504	597	1	-0.17634	0.50022	0.69018	0.989325	443	1	-0.17634
FBgn0039622	10	0.90334	0.91061	0.98504	598	1	0.039399	0.057643	0.1721	0.982442	107	3	0.039399
FBgn0016930	10	0.90961	0.91493	0.98504	599	1	-0.13733	0.52598	0.70512	0.989325	452	2	-0.13733
FBgn0024326	10	0.90979	0.91501	0.98504	600	1	0.30792	0.010693	0.04484	0.895776	32	6	0.30792
FBgn0031461	10	0.91264	0.91704	0.98504	601	1	-0.1056	0.025743	0.090743	0.939119	63	2	-0.1056
FBgn0015296	10	0.91317	0.91736	0.98504	602	1	0.10393	0.42743	0.63808	0.989325	406	3	0.10393
FBgn0035703	10	0.91525	0.91875	0.98504	603	1	-0.036803	0.24136	0.4578	0.982442	301	2	-0.036803
FBgn0037826	8	0.96152	0.96085	0.98504	604	0	0.069653	0.022607	0.076445	0.913267	55	3	0.069653
FBgn0263987	5	0.97196	0.97141	0.98504	605	0	0.18341	0.53113	0.58701	0.988972	456	1	0.18341
FBgn0039734	10	0.98296	0.98353	0.98504	606	0	-0.018008	0.16606	0.36053	0.982442	223	1	-0.018008
FBgn0046332	10	0.98296	0.98353	0.98504	607	0	0.050875	0.049927	0.15281	0.982442	94	3	0.050875
FBgn0035046	10	0.98296	0.98353	0.98504	608	0	0.56928	0.00095107	0.0051603	0.640927	5	7	0.56928
FBgn0033935	10	0.98296	0.98353	0.98504	609	0	-0.1404	0.15321	0.34033	0.982442	211	3	-0.1404
FBgn0029117	10	0.98296	0.98353	0.98504	610	0	0.14091	0.01888	0.072081	0.913267	47	4	0.14091
FBgn0032042	10	0.98296	0.98353	0.98504	611	0	0.03987	0.040358	0.1288	0.982442	81	5	0.03987
FBgn0001250	10	0.98296	0.98353	0.98504	612	0	0.006936	0.10804	0.26739	0.982442	165	4	0.006936
FBgn0263076	10	0.98296	0.98353	0.98504	613	0	0.3831	0.015785	0.062225	0.913267	44	5	0.3831
FBgn0000039	10	0.98296	0.98353	0.98504	614	0	-0.13232	0.87744	0.89619	0.990616	588	1	-0.13232
FBgn0265267	10	0.98296	0.98353	0.98504	615	0	0.095528	0.40549	0.61773	0.989325	392	3	0.095528
FBgn0040001	10	0.98296	0.98353	0.98504	616	0	0.13682	0.29489	0.50974	0.984977	326	2	0.13682
FBgn0027620	10	0.98296	0.98353	0.98504	617	0	0.24329	0.0042736	0.020597	0.671452	20	5	0.24329
FBgn0037039	10	0.98296	0.98353	0.98504	618	0	-0.072831	0.38286	0.5954	0.989325	382	1	-0.072831
FBgn0038870	10	0.98296	0.98353	0.98504	619	0	0.067508	0.29074	0.50552	0.984977	322	3	0.067508
FBgn0031533	10	0.98296	0.98353	0.98504	620	0	-0.23444	0.79935	0.86347	0.990616	560	1	-0.23444
FBgn0040391	10	0.98296	0.98353	0.98504	621	0	0.60493	0.0015852	0.0084653	0.640927	8	6	0.60493
FBgn0026136	10	0.98296	0.98353	0.98504	622	0	0.35958	0.033229	0.11028	0.982442	68	5	0.35958
FBgn0010808	10	0.98296	0.98353	0.98504	623	0	-0.085949	0.4778	0.67786	0.989325	430	2	-0.085949
FBgn0000384	10	0.98296	0.98353	0.98504	624	0	0.39963	0.0030122	0.015728	0.640927	16	5	0.39963
FBgn0283649	10	0.98296	0.98353	0.98504	625	0	0.21036	0.012266	0.049965	0.895776	33	6	0.21036
FBgn0260935	10	0.98296	0.98353	0.98504	626	0	-0.6855	0.93146	0.93205	0.994179	610	1	-0.6855
FBgn0260945	10	0.98296	0.98353	0.98504	627	0	-0.23262	0.034323	0.11306	0.982442	71	3	-0.23262
FBgn0053554	10	0.98296	0.98353	0.98504	628	0	-0.23188	0.86047	0.88774	0.990616	578	1	-0.23188
FBgn0029648	10	0.98296	0.98353	0.98504	629	0	-0.023628	0.11015	0.27073	0.982442	167	2	-0.023628
FBgn0010395	10	0.98296	0.98353	0.98504	630	0	-0.37913	0.24622	0.46259	0.982442	304	2	-0.37913
FBgn0020622	10	0.98296	0.98353	0.98504	631	0	0.033447	0.048674	0.14964	0.982442	93	5	0.033447
FBgn0030812	10	0.98296	0.98353	0.98504	632	0	0.17747	0.067499	0.19618	0.982442	121	5	0.17747
FBgn0026090	10	0.98296	0.98353	0.98504	633	0	0.0093101	0.079971	0.21974	0.982442	137	3	0.0093101
FBgn0030518	10	0.98296	0.98353	0.98504	634	0	0.013189	0.6501	0.78096	0.989325	501	1	0.013189
FBgn0035604	10	0.98296	0.98353	0.98504	635	0	0.14327	0.024105	0.086656	0.913267	60	4	0.14327
FBgn0031462	10	0.98296	0.98353	0.98504	636	0	0.089202	0.122	0.29001	0.982442	175	4	0.089202
FBgn0030425	10	0.98296	0.98353	0.98504	637	0	0.062738	0.14457	0.32667	0.982442	202	3	0.062738
FBgn0086358	10	0.98296	0.98353	0.98504	638	0	-0.5172	0.94318	0.94386	0.994179	619	0	-0.5172
FBgn0003134	10	0.98296	0.98353	0.98504	639	0	-1.0419	0.84937	0.88294	0.990616	576	1	-1.0419
FBgn0030087	10	0.98296	0.98353	0.98504	640	0	-0.12775	0.14705	0.33062	0.982442	204	4	-0.12775
FBgn0038466	10	0.98296	0.98353	0.98504	641	0	-0.086745	0.30517	0.51956	0.984977	330	2	-0.086745
FBgn0037579	10	0.98296	0.98353	0.98504	642	0	0.17332	0.012747	0.051826	0.895776	35	6	0.17332
FBgn0031420	10	0.98296	0.98353	0.98504	643	0	0.17955	0.12894	0.30177	0.982442	185	4	0.17955
FBgn0028476	10	0.98296	0.98353	0.98504	644	0	-0.29094	0.66395	0.78969	0.989325	512	1	-0.29094
FBgn0020258	10	0.98296	0.98353	0.98504	645	0	-0.0668	0.34068	0.55446	0.984977	354	2	-0.0668
FBgn0025632	10	0.98296	0.98353	0.98504	646	0	0.1125	0.33223	0.54592	0.984977	350	3	0.1125
FBgn0024846	10	0.98296	0.98353	0.98504	647	0	0.027698	0.20379	0.41697	0.982442	266	3	0.027698
FBgn0039357	10	0.98296	0.98353	0.98504	648	0	-0.40315	0.13111	0.30529	0.982442	189	4	-0.40315
FBgn0051199	10	0.98296	0.98353	0.98504	649	0	-0.63025	0.044088	0.13844	0.982442	87	2	-0.63025
FBgn0004864	10	0.98296	0.98353	0.98504	650	0	-0.7162	0.087147	0.23174	0.982442	142	1	-0.7162
FBgn0261832	10	0.98296	0.98353	0.98504	651	0	-0.017585	0.18463	0.3885	0.982442	241	4	-0.017585
FBgn0020386	10	0.99964	0.99966	0.999659	652	0	0.65863	0.00013789	0.0009153	0.353226	1	8	0.65863

## Sheet: S1D Scyl
sgrna	Gene	initial sample LFC	DMSO 30 days LFC
Doe2_4935	FBgn0041094	-1.0675	-3.2583
Doe2_4933	FBgn0041094	-0.33082	-2.9193
Doe2_4931	FBgn0041094	-0.87096	-4.0159
Doe2_4937	FBgn0041094	-0.74755	-0.75692
Doe2_4932	FBgn0041094	0.16579	-1.7566
Doe2_4936	FBgn0041094	0.18133	-1.3036
Doe2_4929	FBgn0041094	-0.23183	-1.7744
Doe2_4934	FBgn0041094	-0.233	-2.3709
Doe2_4928	FBgn0041094	0.15972	-0.022314
Doe2_4930	FBgn0041094	-0.027101	-2.2929

## Sheet: S1D Cyp12a4
sgrna	Gene	initial sample LFC	DMSO 30 days LFC
Doe2_4388	FBgn0038681	-0.74755	-0.75692
Doe2_4383	FBgn0038681	-0.74755	-0.75692
Doe2_4387	FBgn0038681	-0.74755	-0.75692
Doe2_4382	FBgn0038681	0.25796	-1.2498
Doe2_4384	FBgn0038681	-0.2677	-0.20414
Doe2_4380	FBgn0038681	0.20266	-2.7603
Doe2_4385	FBgn0038681	0.1281	0.29776
Doe2_4379	FBgn0038681	0.094968	-3.6134
Doe2_4381	FBgn0038681	0.037115	-2.9686
Doe2_4386	FBgn0038681	-0.011487	-2.6567

## Sheet: S1E-0.1 rapa-15d
id	num	neg|score	neg|p-value	neg|fdr	neg|rank	neg|goodsgrna	neg|lfc	pos|score	pos|p-value	pos|fdr	pos|rank	pos|goodsgrna	pos|lfc
FBgn0031662	10	0.86536	0.89353	0.987695	585	1	0.64563	0.00039894	0.0027063	0.894541	1	7	0.64563
FBgn0029979	10	0.83453	0.88107	0.987695	578	1	0.078458	0.00078899	0.0047348	0.894541	2	3	0.078458
FBgn0039277	10	0.10158	0.26017	0.987695	157	2	0.27552	0.0017373	0.0095438	0.894541	3	5	0.27552
FBgn0030680	10	0.20832	0.42399	0.987695	271	2	0.31971	0.0018963	0.010345	0.894541	4	5	0.31971
FBgn0015582	9	0.0091695	0.038685	0.981667	22	3	-0.5479	0.002129	0.011177	0.894541	5	2	-0.5479
FBgn0042711	10	0.50485	0.70006	0.987695	440	1	0.93747	0.0022765	0.012216	0.894541	6	7	0.93747
FBgn0038438	9	0.97999	0.97885	0.987695	619	0	0.24654	0.0027945	0.013927	0.894541	7	4	0.24654
FBgn0024754	10	0.55407	0.72668	0.987695	466	1	0.20446	0.0028933	0.015293	0.894541	8	5	0.20446
FBgn0001187	10	0.011082	0.046314	0.981667	27	4	-0.39412	0.0029569	0.01555	0.894541	9	4	-0.39412
FBgn0037653	10	0.57644	0.73988	0.987695	477	1	0.28755	0.0032251	0.016975	0.894541	10	7	0.28755
FBgn0022800	10	0.68241	0.80442	0.987695	519	1	0.019313	0.0034612	0.017816	0.894541	11	4	0.019313
FBgn0052202	10	0.35999	0.57614	0.987695	358	1	-0.32399	0.0034723	0.017836	0.894541	12	4	-0.32399
FBgn0037370	8	0.88797	0.88835	0.987695	595	1	0.26598	0.0036718	0.016322	0.894541	13	6	0.26598
FBgn0036271	10	0.76625	0.85936	0.987695	552	1	0.50651	0.0044234	0.022229	0.954596	14	6	0.50651
FBgn0032372	10	0.93451	0.9355	0.987695	614	1	-0.11911	0.0045524	0.022813	0.954596	15	2	-0.11911
FBgn0000711	10	0.31292	0.53119	0.987695	334	3	-0.14547	0.0055111	0.027207	0.954596	16	4	-0.14547
FBgn0040297	10	0.64088	0.77821	0.987695	504	2	0.080755	0.0055447	0.027345	0.954596	17	4	0.080755
FBgn0015765	10	0.98704	0.9877	0.987695	639	0	0.28845	0.0068219	0.032065	0.954596	18	5	0.28845
FBgn0053096	10	0.61579	0.76292	0.987695	491	2	0.32884	0.0070807	0.032886	0.954596	19	5	0.32884
FBgn0030518	10	0.68882	0.80861	0.987695	524	1	-0.085937	0.007749	0.03542	0.954596	20	4	-0.085937
FBgn0035769	10	0.61818	0.76435	0.987695	493	2	0.32607	0.0078498	0.035805	0.954596	21	5	0.32607
FBgn0021796	10	0.56984	0.73635	0.987695	474	1	0.27066	0.0080542	0.036508	0.954596	22	5	0.27066
FBgn0030332	10	0.36209	0.57794	0.987695	359	2	0.1183	0.0086481	0.038616	0.954596	23	4	0.1183
FBgn0037880	10	0.54137	0.71995	0.987695	458	2	-0.091031	0.0096266	0.042138	0.954596	24	2	-0.091031
FBgn0030305	10	0.98704	0.9877	0.987695	630	0	0.078072	0.0098188	0.042821	0.954596	25	4	0.078072
FBgn0030844	10	0.38326	0.59815	0.987695	371	3	0.16236	0.010209	0.044197	0.954596	26	4	0.16236
FBgn0037679	10	0.6582	0.78892	0.987695	507	2	-0.11354	0.010213	0.044216	0.954596	27	4	-0.11354
FBgn0014135	10	0.33034	0.5478	0.987695	344	1	0.082311	0.010505	0.045424	0.954596	28	3	0.082311
FBgn0003079	10	0.49892	0.69656	0.987695	438	2	0.020777	0.011213	0.047709	0.954596	29	4	0.020777
FBgn0034179	8	0.53113	0.67545	0.987695	455	2	0.12756	0.011934	0.045414	0.954596	30	4	0.12756
FBgn0266111	10	0.39876	0.61325	0.987695	377	2	0.29989	0.012557	0.052113	0.954596	31	5	0.29989
FBgn0000259	9	0.9193	0.91743	0.987695	607	1	0.24598	0.012936	0.052835	0.954596	32	5	0.24598
FBgn0038485	10	0.77894	0.86276	0.987695	556	1	0.27438	0.013633	0.055655	0.954596	33	6	0.27438
FBgn0039125	10	0.26888	0.48962	0.987695	315	3	0.22925	0.013783	0.05617	0.954596	34	5	0.22925
FBgn0039064	10	0.98704	0.9877	0.987695	635	0	0.24193	0.013867	0.056427	0.954596	35	6	0.24193
FBgn0023023	10	0.69565	0.81326	0.987695	529	1	0.11905	0.014061	0.057179	0.954596	36	4	0.11905
FBgn0026317	10	0.46355	0.67277	0.987695	423	1	0.45711	0.014105	0.057278	0.954596	37	6	0.45711
FBgn0033574	10	0.63576	0.77513	0.987695	502	2	0.3336	0.015344	0.061355	0.954596	38	5	0.3336
FBgn0028988	10	0.044073	0.13931	0.987695	82	3	0.13605	0.016452	0.065006	0.954596	39	4	0.13605
FBgn0267698	10	0.73099	0.83753	0.987695	541	1	0.27197	0.016652	0.065699	0.954596	40	6	0.27197
FBgn0032717	10	0.69348	0.81192	0.987695	526	1	0.14479	0.016861	0.066371	0.954596	41	3	0.14479
FBgn0030071	10	0.8146	0.87387	0.987695	570	1	0.21635	0.017572	0.068944	0.954596	42	5	0.21635
FBgn0030359	10	0.26071	0.48221	0.987695	306	1	-0.70201	0.01781	0.069805	0.954596	43	4	-0.70201
FBgn0053098	10	0.74563	0.84844	0.987695	548	1	0.0046092	0.017858	0.069973	0.954596	44	5	0.0046092
FBgn0034249	10	0.21053	0.42748	0.987695	274	2	-0.031603	0.018006	0.070419	0.954596	45	5	-0.031603
FBgn0033504	10	0.031457	0.10677	0.987695	66	3	-0.08484	0.018298	0.071388	0.954596	46	3	-0.08484
FBgn0039532	10	0.63435	0.77425	0.987695	501	2	0.18093	0.019045	0.073852	0.954596	47	6	0.18093
FBgn0039015	10	0.79879	0.86872	0.987695	562	1	-0.081874	0.01914	0.074169	0.954596	48	3	-0.081874
FBgn0035823	10	0.41089	0.6242	0.987695	385	1	0.34668	0.019529	0.075544	0.954596	49	6	0.34668
FBgn0259243	10	0.58867	0.74714	0.987695	483	1	0.27221	0.019557	0.075663	0.954596	50	5	0.27221
FBgn0001179	10	0.083505	0.22973	0.987695	138	2	0.1761	0.019682	0.076148	0.954596	51	5	0.1761
FBgn0039153	10	0.14847	0.33474	0.987695	213	2	0.19371	0.020805	0.079868	0.954596	52	5	0.19371
FBgn0037855	10	0.3006	0.51984	0.987695	324	3	0.29253	0.021494	0.082352	0.954596	53	5	0.29253
FBgn0036671	10	0.98704	0.9877	0.987695	645	0	0.37839	0.022897	0.086765	0.954596	54	6	0.37839
FBgn0000382	10	0.26451	0.48571	0.987695	311	2	0.11563	0.02309	0.087478	0.954596	55	5	0.11563
FBgn0028538	10	0.86882	0.89511	0.987695	587	1	0.074305	0.02339	0.088546	0.954596	56	4	0.074305
FBgn0036659	10	0.11963	0.28892	0.987695	176	4	0.0041706	0.024003	0.090506	0.954596	57	5	0.0041706
FBgn0000289	10	0.24045	0.46312	0.987695	291	2	-0.91802	0.0242	0.09101	0.954596	58	2	-0.91802
FBgn0053100	10	0.86971	0.89565	0.987695	588	1	0.096018	0.024345	0.091376	0.954596	59	5	0.096018
FBgn0029131	7	0.048147	0.13356	0.987695	91	2	0.30135	0.026258	0.083965	0.954596	60	4	0.30135
FBgn0262870	10	0.98704	0.9877	0.987695	650	0	0.32899	0.02656	0.098521	0.954596	61	6	0.32899
FBgn0037647	10	0.45334	0.6634	0.987695	413	3	0.1121	0.027283	0.10088	0.954596	62	5	0.1121
FBgn0038862	10	0.58258	0.74388	0.987695	481	2	0.058652	0.027283	0.10088	0.954596	63	4	0.058652
FBgn0036970	10	0.095113	0.24926	0.987695	150	2	0.15197	0.027766	0.1022	0.954596	64	6	0.15197
FBgn0030539	10	0.020594	0.078691	0.981667	51	5	-0.33729	0.027775	0.10223	0.954596	65	2	-0.33729
FBgn0004638	10	0.13886	0.32014	0.987695	203	1	-0.91802	0.029007	0.10507	0.954596	66	3	-0.91802
FBgn0010501	10	0.43056	0.64215	0.987695	402	3	-0.2055	0.029806	0.10719	0.954596	67	4	-0.2055
FBgn0028978	10	0.82342	0.87739	0.987695	572	1	0.03732	0.030054	0.10779	0.954596	68	3	0.03732
FBgn0042693	10	0.20476	0.41876	0.987695	267	2	-0.36934	0.030262	0.10826	0.954596	69	3	-0.36934
FBgn0034307	10	0.14844	0.3347	0.987695	212	4	-0.006435	0.030262	0.10826	0.954596	70	4	-0.006435
FBgn0004657	10	0.58131	0.74297	0.987695	480	2	-0.13494	0.030358	0.10849	0.954596	71	3	-0.13494
FBgn0266696	10	0.43897	0.65012	0.987695	406	3	0.082387	0.031893	0.11236	0.954596	72	4	0.082387
FBgn0033115	10	0.010547	0.044671	0.981667	25	5	-0.39562	0.033425	0.11642	0.954596	73	1	-0.39562
FBgn0036346	10	0.98704	0.9877	0.987695	638	0	0.21756	0.033492	0.11656	0.954596	74	4	0.21756
FBgn0033860	10	0.16203	0.35594	0.987695	231	2	-0.39933	0.035098	0.12048	0.954596	75	4	-0.39933
FBgn0034700	10	0.73349	0.83937	0.987695	543	2	0.086282	0.035692	0.12205	0.954596	76	5	0.086282
FBgn0023197	10	0.88384	0.90263	0.987695	593	1	0.011638	0.037376	0.12633	0.954596	77	2	0.011638
FBgn0034783	10	0.68909	0.80886	0.987695	525	2	0.25373	0.037737	0.1273	0.954596	78	5	0.25373
FBgn0061469	10	0.13697	0.31721	0.987695	199	3	0.24595	0.038236	0.1286	0.954596	79	5	0.24595
FBgn0029522	10	0.018111	0.070399	0.981667	44	4	-0.46666	0.038808	0.12986	0.954596	80	3	-0.46666
FBgn0034687	10	0.024939	0.090189	0.981667	56	3	0.23532	0.039053	0.13052	0.954596	81	5	0.23532
FBgn0036932	10	0.16378	0.35872	0.987695	233	3	0.1573	0.03917	0.1309	0.954596	82	5	0.1573
FBgn0261524	9	0.086024	0.21903	0.987695	142	3	-0.14555	0.039271	0.12516	0.954596	83	3	-0.14555
FBgn0035249	10	0.57971	0.74186	0.987695	478	1	0.1832	0.040053	0.13285	0.954596	84	4	0.1832
FBgn0038541	10	0.5691	0.73585	0.987695	472	2	-0.12417	0.040794	0.13472	0.954596	85	4	-0.12417
FBgn0031875	10	0.55024	0.72464	0.987695	464	1	0.2121	0.041052	0.13527	0.954596	86	4	0.2121
FBgn0033656	10	0.45468	0.6646	0.987695	415	2	-0.62743	0.042571	0.13919	0.954596	87	2	-0.62743
FBgn0034789	10	0.32554	0.54347	0.987695	341	3	-0.028132	0.042907	0.13994	0.954596	88	4	-0.028132
FBgn0029999	7	0.95228	0.95266	0.987695	615	0	0.26406	0.043042	0.12397	0.954596	89	3	0.26406
FBgn0263600	10	0.98704	0.9877	0.987695	636	0	0.20143	0.044195	0.14305	0.954596	90	5	0.20143
FBgn0035143	9	0.1866	0.37999	0.987695	252	2	0.20595	0.044361	0.13838	0.954596	91	4	0.20595
FBgn0011300	10	0.3153	0.53356	0.987695	336	3	0.11636	0.044932	0.14496	0.954596	92	5	0.11636
FBgn0033913	10	0.74861	0.85058	0.987695	549	1	-0.10278	0.045603	0.14676	0.954596	93	4	-0.10278
FBgn0015008	10	0.08555	0.2331	0.987695	141	2	-0.75688	0.047115	0.15031	0.954596	94	3	-0.75688
FBgn0037764	10	0.54793	0.7235	0.987695	463	2	-0.083708	0.047909	0.152	0.954596	95	3	-0.083708
FBgn0052311	10	0.71939	0.82974	0.987695	534	1	0.12507	0.048007	0.15212	0.954596	96	4	0.12507
FBgn0050268	10	0.55863	0.72934	0.987695	467	1	-0.17589	0.050134	0.15684	0.954596	97	3	-0.17589
FBgn0038016	10	0.074798	0.21235	0.987695	127	4	-0.11734	0.050134	0.15684	0.954596	98	3	-0.11734
FBgn0033491	10	0.4188	0.63131	0.987695	395	2	0.13682	0.050185	0.15699	0.954596	99	5	0.13682
FBgn0037504	10	0.078597	0.22148	0.987695	133	3	-0.37455	0.051075	0.15921	0.954596	100	3	-0.37455
FBgn0038921	10	0.53936	0.71876	0.987695	457	1	0.25648	0.051162	0.15941	0.954596	101	5	0.25648
FBgn0267435	10	0.98704	0.9877	0.987695	625	0	0.22005	0.051546	0.16033	0.954596	102	5	0.22005
FBgn0004784	10	0.15791	0.34907	0.987695	225	2	0.20004	0.053733	0.16579	0.954596	103	5	0.20004
FBgn0033047	10	0.12426	0.2965	0.987695	183	3	-0.91802	0.054949	0.16879	0.954596	104	3	-0.91802
FBgn0085447	10	0.38518	0.60018	0.987695	372	3	0.1535	0.057593	0.17494	0.954596	105	5	0.1535
FBgn0035522	10	0.92597	0.92829	0.987695	610	1	-0.039337	0.059138	0.17859	0.954596	106	2	-0.039337
FBgn0036827	10	0.72777	0.83524	0.987695	537	2	0.034444	0.059844	0.18021	0.954596	107	2	0.034444
FBgn0036962	10	0.14746	0.33313	0.987695	210	3	-0.51814	0.060466	0.18167	0.954596	108	2	-0.51814
FBgn0036908	10	0.6582	0.78892	0.987695	508	2	-0.11976	0.060496	0.18174	0.954596	109	4	-0.11976
FBgn0030342	10	0.98704	0.9877	0.987695	651	0	-0.098616	0.061509	0.18409	0.954596	110	3	-0.098616
FBgn0024222	10	0.045603	0.1434	0.987695	88	3	0.00026173	0.062122	0.18547	0.954596	111	2	0.00026173
FBgn0033020	5	0.73753	0.7385	0.987695	547	1	-0.30692	0.063066	0.1453	0.954596	112	2	-0.30692
FBgn0036018	10	0.054949	0.16611	0.987695	104	4	-0.91802	0.063611	0.18895	0.954596	113	1	-0.91802
FBgn0031126	10	0.87933	0.90034	0.987695	590	1	0.071343	0.063955	0.18978	0.954596	114	5	0.071343
FBgn0037039	10	0.98704	0.9877	0.987695	634	0	-0.14708	0.06404	0.19	0.954596	115	4	-0.14708
FBgn0021742	10	0.17922	0.38117	0.987695	243	4	-0.12288	0.064079	0.19007	0.954596	116	3	-0.12288
FBgn0042137	10	0.36998	0.58524	0.987695	363	3	0.074727	0.067006	0.19675	0.954596	117	5	0.074727
FBgn0032223	10	0.78376	0.86416	0.987695	558	1	0.11206	0.067341	0.1975	0.954596	118	5	0.11206
FBgn0027570	10	0.063611	0.1869	0.987695	114	2	0.062398	0.067687	0.19848	0.954596	119	3	0.062398
FBgn0260645	9	0.97999	0.97885	0.987695	622	0	0.019365	0.067885	0.19417	0.954596	120	3	0.019365
FBgn0036451	10	0.49641	0.69509	0.987695	436	2	0.31431	0.068015	0.19915	0.954596	121	5	0.31431
FBgn0069056	10	0.097994	0.25397	0.987695	154	2	0.062785	0.068065	0.19924	0.954596	122	3	0.062785
FBgn0033246	10	0.12059	0.29042	0.987695	177	3	-0.75842	0.068065	0.19924	0.954596	123	1	-0.75842
FBgn0050156	10	0.057441	0.17219	0.987695	106	5	-0.34358	0.068065	0.19924	0.954596	124	3	-0.34358
FBgn0031420	10	0.72351	0.83236	0.987695	535	2	-0.15892	0.068301	0.19969	0.954596	125	3	-0.15892
FBgn0035983	10	0.98704	0.9877	0.987695	633	0	-0.012051	0.070898	0.2051	0.954596	126	4	-0.012051
FBgn0085384	10	0.63125	0.77225	0.987695	500	2	-0.325	0.0725	0.20836	0.954596	127	3	-0.325
FBgn0036165	9	0.11529	0.27067	0.987695	171	4	-0.32602	0.073489	0.204	0.954596	128	2	-0.32602
FBgn0034173	10	0.68571	0.80671	0.987695	520	2	0.24	0.073974	0.21176	0.954596	129	5	0.24
FBgn0024811	10	0.10445	0.26491	0.987695	162	1	-0.52093	0.075446	0.21501	0.954596	130	2	-0.52093
FBgn0044047	10	0.24591	0.46827	0.987695	295	2	-0.047164	0.075731	0.21581	0.954596	131	3	-0.047164
FBgn0038466	10	0.4342	0.64571	0.987695	403	2	-0.5787	0.075872	0.21612	0.954596	132	4	-0.5787
FBgn0264078	10	0.84352	0.88458	0.987695	580	1	0.16953	0.076615	0.21765	0.954596	133	5	0.16953
FBgn0031653	10	0.19698	0.40713	0.987695	259	3	-0.27148	0.076916	0.21827	0.954596	134	4	-0.27148
FBgn0015010	10	0.44988	0.6601	0.987695	410	1	0.093864	0.077685	0.22018	0.954596	135	3	0.093864
FBgn0003719	10	0.65919	0.78953	0.987695	510	2	0.2452	0.077805	0.22048	0.954596	136	5	0.2452
FBgn0050020	10	0.41403	0.62713	0.987695	390	2	-0.0067874	0.078384	0.22189	0.954596	137	2	-0.0067874
FBgn0039797	10	0.15459	0.34441	0.987695	222	1	-0.21364	0.079155	0.2234	0.954596	138	3	-0.21364
FBgn0032187	10	0.053144	0.16126	0.987695	100	2	-0.51751	0.08228	0.23024	0.954596	139	3	-0.51751
FBgn0038876	10	0.12355	0.2954	0.987695	182	3	0.11906	0.083156	0.23214	0.954596	140	5	0.11906
FBgn0034356	10	0.23258	0.45568	0.987695	286	3	-0.092859	0.086419	0.23897	0.954596	141	2	-0.092859
FBgn0025632	10	0.013796	0.055517	0.981667	35	5	-0.46362	0.086419	0.23897	0.954596	142	3	-0.46362
FBgn0283536	10	0.22383	0.44655	0.987695	283	1	0.13365	0.086419	0.23897	0.954596	143	3	0.13365
FBgn0000039	10	0.18609	0.39151	0.987695	250	3	-0.099507	0.087912	0.24194	0.954596	144	4	-0.099507
FBgn0265784	10	0.9043	0.91397	0.987695	602	1	0.17383	0.08863	0.24356	0.954596	145	5	0.17383
FBgn0033113	10	0.71368	0.82573	0.987695	532	2	0.044693	0.089863	0.24634	0.954596	146	4	0.044693
FBgn0001974	5	0.40536	0.52725	0.987695	381	1	0.11766	0.089912	0.19448	0.954596	147	3	0.11766
FBgn0050424	5	0.88617	0.88604	0.987695	594	0	0.26986	0.090144	0.19493	0.954596	148	3	0.26986
FBgn0041191	10	0.0029098	0.015214	0.981667	9	3	-0.30926	0.091042	0.2491	0.954596	149	5	-0.30926
FBgn0029672	8	0.26314	0.45421	0.987695	309	3	-0.019215	0.091191	0.22835	0.954596	150	3	-0.019215
FBgn0023169	10	0.91176	0.91874	0.987695	604	1	0.072255	0.092058	0.25122	0.954596	151	5	0.072255
FBgn0039188	10	0.10912	0.27246	0.987695	165	3	-0.76405	0.092223	0.25166	0.954596	152	2	-0.76405
FBgn0004861	10	0.15188	0.34029	0.987695	218	4	-0.00084256	0.092698	0.25259	0.954596	153	4	-0.00084256
FBgn0050046	10	0.75155	0.85269	0.987695	550	1	0.1888	0.095149	0.25758	0.954596	154	5	0.1888
FBgn0030789	8	0.9691	0.96852	0.987695	618	0	0.24332	0.095829	0.23693	0.954596	155	4	0.24332
FBgn0034650	10	0.11157	0.27617	0.987695	167	2	0.33833	0.10024	0.2682	0.954596	156	4	0.33833
FBgn0037579	10	0.49808	0.69615	0.987695	437	2	-0.15392	0.10134	0.27075	0.954596	157	4	-0.15392
FBgn0036156	10	0.090051	0.24062	0.987695	146	4	-0.29972	0.10158	0.2712	0.954596	158	2	-0.29972
FBgn0062412	10	0.30676	0.5253	0.987695	329	3	-0.10202	0.10158	0.2712	0.954596	159	2	-0.10202
FBgn0034029	10	0.0055062	0.02593	0.981667	14	4	-0.21021	0.10202	0.27188	0.954596	160	3	-0.21021
FBgn0037492	10	0.72468	0.83304	0.987695	536	2	-0.088955	0.10235	0.27233	0.954596	161	4	-0.088955
FBgn0052196	7	0.95228	0.95266	0.987695	616	0	-0.093348	0.10249	0.24028	0.954596	162	2	-0.093348
FBgn0086359	10	0.41924	0.63172	0.987695	397	3	-0.30043	0.10301	0.27348	0.954596	163	4	-0.30043
FBgn0015828	10	0.56277	0.73168	0.987695	469	2	0.084633	0.10447	0.27577	0.954596	164	4	0.084633
FBgn0265193	10	0.0026353	0.013997	0.981667	8	4	-0.32929	0.10588	0.27811	0.954596	165	2	-0.32929
FBgn0017572	10	0.5177	0.70714	0.987695	448	1	-0.026947	0.10645	0.27895	0.954596	166	3	-0.026947
FBgn0038524	10	0.41659	0.62939	0.987695	393	3	-0.21071	0.1073	0.28012	0.954596	167	4	-0.21071
FBgn0039796	10	0.89617	0.90916	0.987695	598	1	-0.054765	0.10754	0.28054	0.954596	168	4	-0.054765
FBgn0266084	10	0.19277	0.40128	0.987695	255	3	0.17309	0.10855	0.28199	0.954596	169	4	0.17309
FBgn0010340	10	0.097994	0.25397	0.987695	153	1	-0.07543	0.10988	0.28386	0.954596	170	4	-0.07543
FBgn0028530	10	0.10302	0.26251	0.987695	161	2	0.1355	0.11015	0.28428	0.954596	171	3	0.1355
FBgn0034730	10	0.21689	0.4367	0.987695	278	3	0.1719	0.1111	0.28571	0.954596	172	3	0.1719
FBgn0031869	10	0.68613	0.80704	0.987695	521	2	-0.056183	0.11215	0.28732	0.954596	173	3	-0.056183
FBgn0004108	10	0.22375	0.44643	0.987695	282	3	-0.11016	0.11283	0.28835	0.954596	174	4	-0.11016
FBgn0263235	10	0.71843	0.82906	0.987695	533	2	-0.11667	0.11443	0.29065	0.954596	175	4	-0.11667
FBgn0086708	10	0.15679	0.34755	0.987695	224	4	-0.11033	0.1147	0.29103	0.954596	176	4	-0.11033
FBgn0039710	10	0.30504	0.52375	0.987695	327	3	-0.55315	0.11582	0.29261	0.954596	177	2	-0.55315
FBgn0032519	10	0.98704	0.9877	0.987695	632	0	0.13737	0.11633	0.29336	0.954596	178	4	0.13737
FBgn0029661	4	0.82421	0.82593	0.987695	574	0	0.15759	0.11684	0.20901	0.954596	179	2	0.15759
FBgn0002174	10	0.88798	0.90476	0.987695	596	1	-0.28738	0.11723	0.2946	0.954596	180	2	-0.28738
FBgn0020412	10	0.79082	0.86636	0.987695	559	1	0.00094645	0.11833	0.29628	0.954596	181	4	0.00094645
FBgn0050378	10	0.012024	0.049322	0.981667	31	5	-0.58449	0.11864	0.29678	0.954596	182	4	-0.58449
FBgn0030840	10	0.4277	0.63954	0.987695	399	2	-0.10834	0.11972	0.29848	0.954596	183	3	-0.10834
FBgn0036044	10	0.51365	0.70481	0.987695	447	2	0.15035	0.12007	0.29899	0.954596	184	3	0.15035
FBgn0004050	10	0.38012	0.59507	0.987695	370	3	-0.26612	0.1204	0.29942	0.954596	185	2	-0.26612
FBgn0034202	10	0.021107	0.079878	0.981667	52	4	-0.5415	0.12215	0.30221	0.954596	186	2	-0.5415
FBgn0037678	10	0.49162	0.69258	0.987695	433	2	-0.046065	0.12465	0.30613	0.954596	187	3	-0.046065
FBgn0020236	10	0.2363	0.4593	0.987695	289	3	-0.016045	0.12566	0.30775	0.954596	188	2	-0.016045
FBgn0002773	10	0.623	0.76703	0.987695	497	2	0.054999	0.12845	0.31203	0.954596	189	3	0.054999
FBgn0033500	10	0.40596	0.61989	0.987695	382	3	-0.053726	0.1285	0.31216	0.954596	190	4	-0.053726
FBgn0028562	10	0.47544	0.68381	0.987695	426	2	0.03207	0.1285	0.31216	0.954596	191	4	0.03207
FBgn0265268	10	0.20734	0.42244	0.987695	269	2	-0.32807	0.13075	0.31547	0.954596	192	3	-0.32807
FBgn0035742	10	0.21543	0.43453	0.987695	277	3	-0.87126	0.13124	0.31626	0.954596	193	3	-0.87126
FBgn0264340	10	0.031679	0.10737	0.987695	67	4	-0.25768	0.13207	0.31775	0.954596	194	4	-0.25768
FBgn0037688	10	0.18135	0.38421	0.987695	245	3	-0.11214	0.13256	0.31855	0.954596	195	4	-0.11214
FBgn0030710	10	0.074971	0.21277	0.987695	128	3	-0.32031	0.13263	0.31865	0.954596	196	2	-0.32031
FBgn0031995	10	0.48912	0.69138	0.987695	432	2	-0.74046	0.13314	0.31943	0.954596	197	3	-0.74046
FBgn0036038	10	0.98704	0.9877	0.987695	648	0	0.046086	0.13439	0.32125	0.954596	198	3	0.046086
FBgn0030530	8	0.8754	0.87748	0.987695	589	1	-0.11706	0.13446	0.30734	0.954596	199	4	-0.11706
FBgn0033266	10	0.19995	0.41151	0.987695	262	3	-0.16745	0.1354	0.3227	0.954596	200	3	-0.16745
FBgn0001217	10	0.53581	0.71688	0.987695	456	1	-0.049109	0.13678	0.32471	0.954596	201	3	-0.049109
FBgn0000229	10	0.1487	0.33519	0.987695	215	2	-0.057381	0.13733	0.32559	0.954596	202	3	-0.057381
FBgn0039622	10	0.0023314	0.012334	0.981667	6	4	-0.30609	0.13801	0.32642	0.954596	203	2	-0.30609
FBgn0044826	10	0.48523	0.68949	0.987695	431	2	-0.6663	0.13801	0.32642	0.954596	204	3	-0.6663
FBgn0005775	10	0.72807	0.83542	0.987695	538	2	0.18594	0.13874	0.32752	0.954596	205	4	0.18594
FBgn0029114	10	0.45382	0.66383	0.987695	414	3	-0.23275	0.13964	0.32893	0.954596	206	3	-0.23275
FBgn0028902	10	0.23009	0.45329	0.987695	285	2	0.061642	0.13978	0.32914	0.954596	207	4	0.061642
FBgn0037140	10	0.39785	0.61231	0.987695	376	2	0.088978	0.14087	0.33052	0.954596	208	4	0.088978
FBgn0262081	10	0.65979	0.78996	0.987695	511	1	-0.22036	0.14182	0.33188	0.954596	209	3	-0.22036
FBgn0036862	10	0.34613	0.56304	0.987695	352	2	-0.23453	0.14264	0.33302	0.954596	210	4	-0.23453
FBgn0260646	10	0.43608	0.64731	0.987695	404	3	0.0083064	0.14347	0.33418	0.954596	211	2	0.0083064
FBgn0028847	10	0.14406	0.32792	0.987695	207	4	-0.69316	0.14457	0.33579	0.954596	212	2	-0.69316
FBgn0038705	10	0.33577	0.55341	0.987695	347	2	-0.17087	0.14505	0.33645	0.954596	213	3	-0.17087
FBgn0051624	7	0.38938	0.54724	0.987695	373	2	-0.35518	0.14774	0.30282	0.954596	214	2	-0.35518
FBgn0038681	10	0.11864	0.28722	0.987695	175	2	-0.2716	0.14798	0.34087	0.954596	215	4	-0.2716
FBgn0014011	10	0.46597	0.67509	0.987695	424	2	-0.21322	0.14815	0.34118	0.954596	216	3	-0.21322
FBgn0050293	10	0.36315	0.57894	0.987695	360	1	-0.025145	0.15188	0.34685	0.954596	217	4	-0.025145
FBgn0015269	10	0.82075	0.87623	0.987695	571	1	-0.060888	0.152	0.34703	0.954596	218	4	-0.060888
FBgn0037625	10	0.24491	0.46735	0.987695	293	3	-0.052784	0.15343	0.34902	0.954596	219	3	-0.052784
FBgn0266721	10	0.31196	0.53013	0.987695	333	1	-0.076836	0.15388	0.34975	0.954596	220	4	-0.076836
FBgn0024992	10	0.16185	0.3556	0.987695	230	2	0.062112	0.15497	0.35123	0.954596	221	4	0.062112
FBgn0001281	10	0.05164	0.1576	0.987695	95	3	-0.29606	0.15527	0.35169	0.954596	222	4	-0.29606
FBgn0025626	10	0.14642	0.33151	0.987695	209	2	-0.59798	0.15527	0.35169	0.954596	223	2	-0.59798
FBgn0033706	9	0.97999	0.97885	0.987695	624	0	0.13628	0.15858	0.34639	0.954596	224	3	0.13628
FBgn0038979	10	0.31601	0.53426	0.987695	337	3	-0.076664	0.15944	0.35773	0.954596	225	3	-0.076664
FBgn0024996	10	0.91352	0.91981	0.987695	605	1	-0.069959	0.16101	0.3601	0.954596	226	3	-0.069959
FBgn0033192	10	0.26266	0.48409	0.987695	308	3	-0.59103	0.16129	0.3606	0.954596	227	3	-0.59103
FBgn0035425	10	0.60675	0.75731	0.987695	488	2	-0.041064	0.16141	0.36082	0.954596	228	3	-0.041064
FBgn0027779	10	0.77894	0.86276	0.987695	557	1	-0.046628	0.16341	0.36394	0.954596	229	4	-0.046628
FBgn0041789	10	0.1354	0.31473	0.987695	196	1	-0.50716	0.16517	0.36647	0.954596	230	3	-0.50716
FBgn0031610	10	0.065098	0.19061	0.987695	117	2	-0.14227	0.16525	0.36655	0.954596	231	2	-0.14227
FBgn0031830	10	0.11806	0.28625	0.987695	174	2	-0.36353	0.16568	0.36715	0.954596	232	4	-0.36353
FBgn0030035	10	0.014716	0.058505	0.981667	36	4	-0.033797	0.16756	0.36973	0.954596	233	3	-0.033797
FBgn0000036	10	0.034955	0.11591	0.987695	72	3	-0.054561	0.16763	0.36983	0.954596	234	4	-0.054561
FBgn0052451	10	0.076739	0.21688	0.987695	130	4	-0.2213	0.1681	0.37059	0.954596	235	3	-0.2213
FBgn0035574	8	0.25386	0.44298	0.987695	301	2	-0.41926	0.1686	0.35019	0.954596	236	3	-0.41926
FBgn0032700	10	0.28116	0.50087	0.987695	318	3	-0.05145	0.16874	0.37137	0.954596	237	4	-0.05145
FBgn0030384	10	0.054149	0.16414	0.987695	101	3	-0.52355	0.16874	0.37137	0.954596	238	2	-0.52355
FBgn0032381	10	0.80648	0.87111	0.987695	567	1	-0.12594	0.16874	0.37137	0.954596	239	3	-0.12594
FBgn0053169	10	0.86831	0.89477	0.987695	586	1	0.039677	0.16959	0.37263	0.954596	240	4	0.039677
FBgn0037714	10	0.98704	0.9877	0.987695	644	0	0.028742	0.16981	0.37301	0.954596	241	3	0.028742
FBgn0031187	10	0.73387	0.83964	0.987695	544	2	0.01308	0.17407	0.37882	0.954596	242	3	0.01308
FBgn0259977	10	0.21499	0.43394	0.987695	276	2	-0.18621	0.17439	0.37923	0.954596	243	3	-0.18621
FBgn0036118	10	0.54599	0.72232	0.987695	462	1	-0.056735	0.1746	0.3795	0.954596	244	3	-0.056735
FBgn0037248	10	0.92421	0.92696	0.987695	609	1	-0.91802	0.17606	0.38148	0.954596	245	2	-0.91802
FBgn0039623	10	0.52218	0.70955	0.987695	452	2	-0.16622	0.17704	0.38291	0.954596	246	3	-0.16622
FBgn0020621	10	0.11591	0.28296	0.987695	173	3	-0.22722	0.17738	0.38335	0.954596	247	3	-0.22722
FBgn0000274	10	0.98704	0.9877	0.987695	637	0	-0.085531	0.17766	0.38365	0.954596	248	3	-0.085531
FBgn0039098	10	0.12073	0.29061	0.987695	178	4	-0.1687	0.17868	0.38509	0.954596	249	3	-0.1687
FBgn0026179	10	0.019557	0.075425	0.981667	49	3	-0.6427	0.17871	0.38514	0.954596	250	3	-0.6427
FBgn0031441	10	0.59267	0.74944	0.987695	484	2	-0.12694	0.17958	0.38639	0.954596	251	2	-0.12694
FBgn0016984	10	0.18634	0.39185	0.987695	251	4	-0.14265	0.18003	0.38704	0.954596	252	2	-0.14265
FBgn0003483	10	0.40452	0.6185	0.987695	380	3	-0.1079	0.18032	0.38732	0.954596	253	3	-0.1079
FBgn0260648	10	0.40959	0.62311	0.987695	384	3	-0.026221	0.18158	0.38909	0.954596	254	4	-0.026221
FBgn0020299	10	0.019532	0.075307	0.981667	48	2	0.07209	0.18237	0.39022	0.954596	255	3	0.07209
FBgn0033086	10	0.10218	0.26104	0.987695	160	4	-0.4113	0.18299	0.39109	0.954596	256	3	-0.4113
FBgn0035995	10	0.15988	0.35246	0.987695	228	2	0.11844	0.18395	0.39258	0.954596	257	4	0.11844
FBgn0003890	8	0.044641	0.1281	0.987695	84	3	-0.63695	0.18454	0.36913	0.954596	258	2	-0.63695
FBgn0050495	10	0.1377	0.31833	0.987695	201	3	-0.036773	0.18671	0.39654	0.954596	259	3	-0.036773
FBgn0027356	8	0.80701	0.8322	0.987695	568	1	-0.16207	0.1877	0.37272	0.954596	260	2	-0.16207
FBgn0050476	10	0.076916	0.21722	0.987695	131	4	-0.3376	0.18788	0.3981	0.954596	261	4	-0.3376
FBgn0032650	10	0.066607	0.19422	0.987695	120	2	-0.91649	0.18922	0.40019	0.954596	262	2	-0.91649
FBgn0030674	5	0.57443	0.61819	0.987695	476	1	-0.91802	0.18938	0.31973	0.954596	263	1	-0.91802
FBgn0013672	10	0.98704	0.9877	0.987695	652	0	-0.17474	0.19053	0.40203	0.954596	264	3	-0.17474
FBgn0264959	10	0.12429	0.29653	0.987695	184	3	-0.38664	0.19109	0.40272	0.954596	265	3	-0.38664
FBgn0024326	10	0.48043	0.68698	0.987695	429	2	-0.077096	0.19256	0.4047	0.954596	266	3	-0.077096
FBgn0036695	10	0.11579	0.2828	0.987695	172	4	-0.18262	0.19268	0.40487	0.954596	267	2	-0.18262
FBgn0028983	10	0.21456	0.43334	0.987695	275	3	-0.067508	0.19313	0.40538	0.954596	268	3	-0.067508
FBgn0010808	10	0.28597	0.50556	0.987695	319	3	-0.36434	0.19508	0.4078	0.954596	269	2	-0.36434
FBgn0053554	10	0.21914	0.4399	0.987695	279	3	-0.64824	0.19679	0.4103	0.954596	270	3	-0.64824
FBgn0050428	10	0.22257	0.44473	0.987695	280	1	-0.26664	0.19825	0.41223	0.954596	271	3	-0.26664
FBgn0032304	10	0.33086	0.5483	0.987695	345	2	0.082308	0.19832	0.41233	0.954596	272	3	0.082308
FBgn0036323	8	0.56333	0.70055	0.987695	470	2	-0.33174	0.19875	0.38573	0.954596	273	3	-0.33174
FBgn0040234	10	0.19427	0.40323	0.987695	256	4	0.015855	0.19987	0.4145	0.954596	274	4	0.015855
FBgn0019990	10	0.018297	0.071022	0.981667	45	4	-0.18765	0.20093	0.41594	0.954596	275	4	-0.18765
FBgn0038584	10	0.41254	0.62578	0.987695	387	2	0.04393	0.2015	0.41687	0.954596	276	3	0.04393
FBgn0039584	10	0.42815	0.63989	0.987695	400	3	-0.10601	0.2022	0.4179	0.954596	277	3	-0.10601
FBgn0033473	10	0.54511	0.72184	0.987695	460	2	0.051242	0.20234	0.41809	0.954596	278	4	0.051242
FBgn0259168	10	0.052723	0.16022	0.987695	99	5	-0.30214	0.20348	0.41971	0.954596	279	1	-0.30214
FBgn0027083	10	0.39123	0.60606	0.987695	374	2	-0.067733	0.20447	0.42118	0.954596	280	4	-0.067733
FBgn0028427	10	0.011776	0.04862	0.981667	30	3	-0.56551	0.20464	0.42139	0.954596	281	3	-0.56551
FBgn0035082	10	0.28091	0.50075	0.987695	317	1	-0.09418	0.20477	0.42149	0.954596	282	3	-0.09418
FBgn0034265	10	0.12566	0.29894	0.987695	186	3	0.072947	0.20734	0.42497	0.954596	283	2	0.072947
FBgn0037156	9	0.97999	0.97885	0.987695	620	0	0.12436	0.20969	0.42106	0.954596	284	3	0.12436
FBgn0028500	10	0.023495	0.086686	0.981667	55	4	-0.91802	0.2098	0.42888	0.954596	285	3	-0.91802
FBgn0019890	10	0.25347	0.47553	0.987695	300	1	-0.54658	0.21055	0.42983	0.954596	286	4	-0.54658
FBgn0023213	10	0.82913	0.87938	0.987695	576	1	0.066762	0.21218	0.43211	0.954596	287	4	0.066762
FBgn0267033	8	0.55139	0.69129	0.987695	465	1	0.11636	0.21254	0.40142	0.954596	288	3	0.11636
FBgn0030956	10	0.35363	0.57027	0.987695	356	1	-0.50523	0.2138	0.43429	0.954596	289	4	-0.50523
FBgn0052105	10	0.31119	0.52953	0.987695	332	3	0.018877	0.21435	0.43503	0.954596	290	4	0.018877
FBgn0283442	10	0.85023	0.88738	0.987695	582	1	-0.50088	0.21625	0.43764	0.954596	291	3	-0.50088
FBgn0051852	10	0.59989	0.75363	0.987695	485	2	-0.52102	0.21798	0.44004	0.954596	292	4	-0.52102
FBgn0046692	10	0.13678	0.31686	0.987695	198	3	-0.12049	0.21879	0.44115	0.954596	293	3	-0.12049
FBgn0039044	10	0.2645	0.4857	0.987695	310	3	-0.27793	0.22023	0.44292	0.954596	294	3	-0.27793
FBgn0001250	10	0.49471	0.69412	0.987695	435	2	0.094715	0.22036	0.443	0.954596	295	4	0.094715
FBgn0040068	10	0.90257	0.91295	0.987695	599	1	-0.69935	0.22068	0.44343	0.954596	296	2	-0.69935
FBgn0020622	10	0.7293	0.83638	0.987695	540	2	-0.16854	0.22068	0.44343	0.954596	297	1	-0.16854
FBgn0027342	10	0.61288	0.761	0.987695	490	2	0.17733	0.22164	0.4449	0.954596	298	4	0.17733
FBgn0037538	10	0.047115	0.14712	0.987695	89	2	0.10267	0.22205	0.4455	0.954596	299	4	0.10267
FBgn0042710	10	0.50839	0.70189	0.987695	443	2	0.064994	0.22219	0.4457	0.954596	300	4	0.064994
FBgn0051826	10	0.73412	0.83983	0.987695	545	1	-0.42625	0.22383	0.44797	0.954596	301	4	-0.42625
FBgn0038448	10	0.01565	0.061849	0.981667	38	3	-0.30243	0.22385	0.44802	0.954596	302	2	-0.30243
FBgn0028397	10	0.2533	0.47538	0.987695	299	3	-0.14893	0.22514	0.44969	0.955038	303	4	-0.14893
FBgn0005592	10	0.018006	0.070033	0.981667	43	2	-0.17556	0.22847	0.45428	0.95588	304	4	-0.17556
FBgn0001965	8	0.045174	0.12927	0.987695	87	3	-0.30881	0.22988	0.42114	0.954596	305	2	-0.30881
FBgn0260398	10	0.37795	0.59297	0.987695	368	3	0.11856	0.23104	0.45789	0.95588	306	4	0.11856
FBgn0024329	10	0.51778	0.70716	0.987695	449	2	0.13571	0.23145	0.45846	0.95588	307	4	0.13571
FBgn0031040	10	0.49415	0.69386	0.987695	434	2	-0.025542	0.23183	0.45888	0.95588	308	4	-0.025542
FBgn0035046	10	0.034599	0.11496	0.987695	71	5	-0.48968	0.23393	0.46163	0.958547	309	3	-0.48968
FBgn0053116	7	0.95228	0.95266	0.987695	617	0	-0.36898	0.23907	0.4243	0.954596	310	2	-0.36898
FBgn0003091	10	0.73726	0.84208	0.987695	546	2	-0.22028	0.23972	0.46956	0.960237	311	4	-0.22028
FBgn0024740	10	0.084441	0.23121	0.987695	139	4	-0.32484	0.24001	0.46996	0.960237	312	3	-0.32484
FBgn0000384	10	0.036403	0.11971	0.987695	75	4	-0.59757	0.24186	0.47235	0.960237	313	2	-0.59757
FBgn0031463	10	0.72856	0.83582	0.987695	539	1	0.096724	0.24237	0.47307	0.960237	314	4	0.096724
FBgn0036717	10	0.4562	0.66611	0.987695	416	3	-0.13152	0.24785	0.48074	0.960237	315	3	-0.13152
FBgn0041164	10	0.13168	0.30879	0.987695	193	4	-0.0082327	0.24847	0.48146	0.960237	316	4	-0.0082327
FBgn0030855	10	0.66953	0.79599	0.987695	516	2	-0.003289	0.24898	0.48197	0.960237	317	4	-0.003289
FBgn0041094	10	0.41924	0.63172	0.987695	396	3	-0.24636	0.24982	0.48303	0.960237	318	2	-0.24636
FBgn0030679	10	0.31918	0.53734	0.987695	339	2	-0.91802	0.25048	0.48393	0.960237	319	2	-0.91802
FBgn0002413	10	0.062122	0.1833	0.987695	113	4	-0.49589	0.25103	0.48472	0.960237	320	2	-0.49589
FBgn0004118	10	0.30996	0.52846	0.987695	331	2	-0.2965	0.25193	0.48582	0.960237	321	4	-0.2965
FBgn0030505	10	0.6228	0.76696	0.987695	496	1	0.0035554	0.25352	0.48786	0.960237	322	3	0.0035554
FBgn0003356	10	0.70887	0.82215	0.987695	531	2	-0.1598	0.25535	0.49011	0.960237	323	2	-0.1598
FBgn0015296	10	0.0023653	0.012502	0.981667	7	5	-0.19135	0.2571	0.49245	0.960237	324	3	-0.19135
FBgn0021856	10	0.45265	0.66273	0.987695	412	2	-0.46432	0.25718	0.49258	0.960237	325	2	-0.46432
FBgn0250819	10	0.92784	0.92974	0.987695	612	1	0.0023352	0.25831	0.49416	0.960237	326	3	0.0023352
FBgn0024248	8	0.09262	0.22913	0.987695	147	3	-0.25016	0.25854	0.45432	0.95588	327	2	-0.25016
FBgn0003132	10	0.6669	0.79434	0.987695	515	1	0.15929	0.25966	0.49574	0.960237	328	4	0.15929
FBgn0003028	10	0.33528	0.55283	0.987695	346	2	0.075247	0.26044	0.4966	0.960237	329	4	0.075247
FBgn0039938	10	0.48398	0.6887	0.987695	430	2	-0.41254	0.26372	0.50074	0.960237	330	1	-0.41254
FBgn0046689	10	0.40101	0.61522	0.987695	378	2	-0.24624	0.26372	0.50074	0.960237	331	3	-0.24624
FBgn0034567	10	0.15071	0.33815	0.987695	217	4	-0.24405	0.26372	0.50074	0.960237	332	1	-0.24405
FBgn0022382	7	0.12579	0.26382	0.987695	187	1	0.09708	0.26375	0.45636	0.95588	333	3	0.09708
FBgn0030538	8	0.023091	0.078157	0.981667	54	4	-0.75996	0.27012	0.46698	0.960237	334	2	-0.75996
FBgn0032871	10	0.28675	0.50631	0.987695	320	2	-0.13921	0.27125	0.50917	0.962936	335	2	-0.13921
FBgn0032934	10	0.65315	0.78592	0.987695	506	1	-0.10238	0.27147	0.50932	0.962936	336	2	-0.10238
FBgn0041184	10	0.057643	0.17261	0.987695	107	3	0.082249	0.27211	0.50983	0.962936	337	3	0.082249
FBgn0038279	10	0.22287	0.44512	0.987695	281	3	-0.36534	0.27247	0.5102	0.962936	338	2	-0.36534
FBgn0264075	9	0.8304	0.85829	0.987695	577	1	-0.48165	0.27301	0.48477	0.960237	339	2	-0.48165
FBgn0003140	10	0.98704	0.9877	0.987695	626	0	0.13132	0.27431	0.51181	0.962936	340	3	0.13132
FBgn0033980	10	0.30403	0.52292	0.987695	325	2	-0.064579	0.27502	0.51248	0.962936	341	1	-0.064579
FBgn0037826	8	0.52888	0.67358	0.987695	453	2	-0.78787	0.27693	0.47457	0.960237	342	2	-0.78787
FBgn0039421	10	0.25108	0.47328	0.987695	296	3	-0.70769	0.27721	0.51426	0.963506	343	3	-0.70769
FBgn0040391	10	0.0023282	0.012314	0.981667	5	4	-0.39526	0.28091	0.51734	0.965817	344	2	-0.39526
FBgn0261854	8	0.040481	0.11896	0.987695	78	3	-0.19673	0.28289	0.48097	0.960237	345	3	-0.19673
FBgn0032642	10	0.53064	0.71423	0.987695	454	2	-0.056186	0.28442	0.52029	0.965817	346	2	-0.056186
FBgn0051719	6	0.9263	0.92558	0.987695	611	0	-0.088514	0.2849	0.44293	0.954596	347	2	-0.088514
FBgn0052383	10	0.24247	0.46492	0.987695	292	1	-0.91802	0.28559	0.52134	0.965817	348	3	-0.91802
FBgn0039650	10	0.044088	0.13934	0.987695	83	3	-0.34699	0.287	0.5226	0.965817	349	3	-0.34699
FBgn0003134	10	0.51915	0.70788	0.987695	450	2	-0.81404	0.28908	0.52453	0.965817	350	1	-0.81404
FBgn0260935	10	0.81023	0.87246	0.987695	569	1	-0.4537	0.2914	0.52657	0.965817	351	3	-0.4537
FBgn0283649	10	0.80395	0.87031	0.987695	565	1	-0.064796	0.29285	0.528	0.965817	352	3	-0.064796
FBgn0010316	7	0.12935	0.26896	0.987695	191	2	-0.26764	0.29657	0.49004	0.960237	353	2	-0.26764
FBgn0083141	10	0.34038	0.55759	0.987695	351	3	-0.12781	0.30381	0.53751	0.975318	354	3	-0.12781
FBgn0263076	10	0.013287	0.053963	0.981667	33	6	-0.62672	0.30403	0.53772	0.975318	355	1	-0.62672
FBgn0031006	2	0.80135	0.80092	0.987695	564	0	0.15254	0.30731	0.31753	0.954596	356	1	0.15254
FBgn0019940	10	0.17074	0.369	0.987695	237	3	-0.301	0.3078	0.54083	0.975318	357	3	-0.301
FBgn0051992	10	0.1021	0.261	0.987695	159	4	-0.22185	0.30913	0.54197	0.975318	358	3	-0.22185
FBgn0031462	10	0.1298	0.30566	0.987695	192	4	-0.37662	0.30965	0.54255	0.975318	359	3	-0.37662
FBgn0029648	10	0.2606	0.48211	0.987695	305	3	-0.68096	0.3134	0.5458	0.975318	360	3	-0.68096
FBgn0030425	10	0.25443	0.47651	0.987695	302	3	-0.25418	0.31534	0.54758	0.975318	361	2	-0.25418
FBgn0039305	10	0.042371	0.13506	0.987695	79	5	-0.3513	0.31672	0.54884	0.975318	362	2	-0.3513
FBgn0037325	10	0.2027	0.41557	0.987695	265	4	-0.29301	0.31734	0.54934	0.975318	363	3	-0.29301
FBgn0035508	10	0.1262	0.29975	0.987695	188	3	0.15508	0.31918	0.55094	0.975318	364	3	0.15508
FBgn0000489	10	0.2021	0.4149	0.987695	263	3	-0.40482	0.32093	0.55241	0.975318	365	3	-0.40482
FBgn0261560	10	0.20743	0.4226	0.987695	270	3	-0.3143	0.32204	0.55348	0.975318	366	2	-0.3143
FBgn0032820	10	0.75514	0.85499	0.987695	551	1	-0.91802	0.32427	0.55543	0.976115	367	3	-0.91802
FBgn0020660	8	0.14299	0.30721	0.987695	206	3	-0.88377	0.32593	0.52883	0.965817	368	2	-0.88377
FBgn0029067	10	0.093181	0.24594	0.987695	149	3	-0.32753	0.32779	0.55845	0.978781	369	3	-0.32753
FBgn0020258	10	0.44944	0.65971	0.987695	409	2	-0.24997	0.33089	0.56093	0.980498	370	2	-0.24997
FBgn0003371	10	0.662	0.79129	0.987695	512	2	-0.12538	0.3351	0.56483	0.98204	371	3	-0.12538
FBgn0028717	10	0.73121	0.83777	0.987695	542	2	-0.030101	0.3351	0.56483	0.98204	372	3	-0.030101
FBgn0039777	9	0.97999	0.97885	0.987695	621	0	-0.195	0.33524	0.54688	0.975318	373	2	-0.195
FBgn0030793	10	0.067173	0.19548	0.987695	121	5	-0.32925	0.33691	0.56648	0.98204	374	3	-0.32925
FBgn0011754	10	0.50839	0.70189	0.987695	442	2	-0.91802	0.33855	0.56784	0.98204	375	2	-0.91802
FBgn0039241	10	0.16405	0.35914	0.987695	234	1	-0.10801	0.34405	0.57242	0.984739	376	2	-0.10801
FBgn0260945	10	0.14847	0.33474	0.987695	214	2	-0.65141	0.3465	0.57456	0.985497	377	2	-0.65141
FBgn0267339	10	0.79729	0.86834	0.987695	561	1	-0.91802	0.34782	0.57588	0.985497	378	3	-0.91802
FBgn0040377	10	0.11299	0.27858	0.987695	168	3	-0.2962	0.35477	0.58185	0.987858	379	2	-0.2962
FBgn0265267	10	0.1423	0.32531	0.987695	205	1	-0.56949	0.35986	0.58614	0.987858	380	3	-0.56949
FBgn0267912	10	0.80648	0.87111	0.987695	566	1	-0.48872	0.36087	0.58689	0.987858	381	2	-0.48872
FBgn0034381	10	0.19703	0.40723	0.987695	260	4	-0.29644	0.36105	0.58701	0.987858	382	3	-0.29644
FBgn0027620	10	0.83931	0.88294	0.987695	579	1	-0.0049911	0.36323	0.58884	0.987858	383	3	-0.0049911
FBgn0031533	10	0.69402	0.81224	0.987695	528	1	-0.16539	0.36516	0.59056	0.987858	384	3	-0.16539
FBgn0283472	10	0.028822	0.099995	0.987695	63	3	0.13342	0.36819	0.59315	0.987858	385	2	0.13342
FBgn0265042	10	0.1797	0.38186	0.987695	244	3	-0.79684	0.36944	0.5941	0.987858	386	1	-0.79684
FBgn0042712	10	0.31672	0.53501	0.987695	338	2	-0.26262	0.37123	0.59575	0.987858	387	2	-0.26262
FBgn0014366	10	0.28793	0.50751	0.987695	322	3	-0.46257	0.37245	0.59696	0.987858	388	2	-0.46257
FBgn0040368	10	0.23482	0.45788	0.987695	287	3	-0.068941	0.37488	0.59893	0.988608	389	2	-0.068941
FBgn0033199	10	0.018366	0.07118	0.981667	46	4	-0.71127	0.37819	0.6019	0.989159	390	3	-0.71127
FBgn0024698	9	0.049174	0.15034	0.987695	92	3	-0.91802	0.38531	0.59598	0.987858	391	2	-0.91802
FBgn0086384	9	0.0035461	0.016846	0.981667	10	3	-0.91802	0.38628	0.59691	0.987858	392	2	-0.91802
FBgn0001089	10	0.08467	0.23157	0.987695	140	4	-0.16307	0.38689	0.60991	0.989159	393	3	-0.16307
FBgn0032405	10	0.10202	0.26087	0.987695	158	4	-0.34309	0.38846	0.61134	0.989159	394	2	-0.34309
FBgn0264298	10	0.081123	0.22577	0.987695	136	4	-0.31257	0.38846	0.61134	0.989159	395	1	-0.31257
FBgn0034350	9	0.51072	0.67588	0.987695	445	2	-0.0079826	0.39224	0.60276	0.989159	396	2	-0.0079826
FBgn0027794	10	0.45759	0.66725	0.987695	418	2	-0.36104	0.39364	0.61591	0.989159	397	2	-0.36104
FBgn0015279	9	0.97999	0.97885	0.987695	623	0	-0.038537	0.39847	0.60876	0.989159	398	2	-0.038537
FBgn0033397	10	0.0886	0.23808	0.987695	144	3	-0.79833	0.39897	0.62059	0.989159	399	3	-0.79833
FBgn0010269	10	0.14767	0.33345	0.987695	211	4	-0.28491	0.40042	0.62181	0.989159	400	3	-0.28491
FBgn0038017	10	0.099195	0.25602	0.987695	155	4	-0.78939	0.40251	0.62347	0.989159	401	3	-0.78939
FBgn0020386	10	0.24493	0.46736	0.987695	294	3	-0.22078	0.40251	0.62347	0.989159	402	2	-0.22078
FBgn0000273	10	0.25923	0.48094	0.987695	304	3	-0.24788	0.40266	0.62358	0.989159	403	3	-0.24788
FBgn0038870	10	0.05943	0.1769	0.987695	111	4	-0.24397	0.40356	0.62444	0.989159	404	3	-0.24397
FBgn0038515	10	0.26611	0.48708	0.987695	314	3	-0.38978	0.40573	0.62632	0.989159	405	3	-0.38978
FBgn0036964	9	0.77667	0.83668	0.987695	555	1	-0.24203	0.40579	0.61569	0.989159	406	1	-0.24203
FBgn0265089	10	0.064534	0.18922	0.987695	116	4	-0.63115	0.40597	0.62656	0.989159	407	2	-0.63115
FBgn0037657	10	0.67388	0.79884	0.987695	518	1	-0.65241	0.40814	0.62841	0.989159	408	3	-0.65241
FBgn0033917	10	0.078384	0.22104	0.987695	132	3	-0.14057	0.41285	0.63227	0.989159	409	3	-0.14057
FBgn0053121	9	0.57303	0.71757	0.987695	475	2	-0.16153	0.41403	0.62402	0.989159	410	3	-0.16153
FBgn0035101	10	0.6937	0.81202	0.987695	527	2	-0.19418	0.41463	0.63381	0.989159	411	3	-0.19418
FBgn0032042	10	0.005586	0.026247	0.981667	16	5	-0.91044	0.41675	0.6354	0.989159	412	2	-0.91044
FBgn0038952	10	0.12706	0.30116	0.987695	189	3	-0.34179	0.41779	0.63634	0.989159	413	3	-0.34179
FBgn0033889	10	0.15231	0.34089	0.987695	219	4	-0.3656	0.41869	0.63703	0.989159	414	2	-0.3656
FBgn0026379	10	0.033425	0.11208	0.987695	70	3	-0.13959	0.4202	0.6383	0.989159	415	3	-0.13959
FBgn0033315	10	0.031893	0.1079	0.987695	68	3	-0.65684	0.42118	0.63921	0.989159	416	2	-0.65684
FBgn0039049	10	0.98704	0.9877	0.987695	628	0	-0.16608	0.42352	0.64112	0.989159	417	2	-0.16608
FBgn0032664	10	0.89103	0.90642	0.987695	597	1	-0.03094	0.42651	0.64363	0.989159	418	2	-0.03094
FBgn0050438	10	0.47955	0.6865	0.987695	428	2	-0.65126	0.4277	0.64474	0.989159	419	3	-0.65126
FBgn0035533	10	0.77006	0.86026	0.987695	554	1	-0.057035	0.42926	0.64601	0.989159	420	3	-0.057035
FBgn0033128	10	0.17672	0.37744	0.987695	241	3	-0.11322	0.43116	0.64773	0.989159	421	1	-0.11322
FBgn0040001	10	0.13755	0.31812	0.987695	200	4	-0.41218	0.43128	0.64781	0.989159	422	3	-0.41218
FBgn0002940	10	0.62017	0.7654	0.987695	495	2	-0.53178	0.43919	0.65466	0.992641	423	2	-0.53178
FBgn0040370	10	0.10678	0.26881	0.987695	163	3	0.031775	0.43919	0.65466	0.992641	424	2	0.031775
FBgn0036428	10	0.98704	0.9877	0.987695	640	0	-0.057843	0.43919	0.65466	0.992641	425	2	-0.057843
FBgn0030805	4	0.82421	0.82593	0.987695	573	0	-0.42218	0.44921	0.50812	0.962936	426	1	-0.42218
FBgn0010549	10	0.41442	0.62751	0.987695	391	3	-0.090872	0.45262	0.66613	0.994139	427	3	-0.090872
FBgn0029722	10	0.62346	0.76722	0.987695	498	1	-0.67718	0.45262	0.66613	0.994139	428	3	-0.67718
FBgn0004463	10	0.069546	0.20078	0.987695	124	3	-0.28645	0.45766	0.67041	0.994139	429	2	-0.28645
FBgn0000560	10	0.038008	0.12404	0.987695	76	2	-0.20135	0.45766	0.67041	0.994139	430	1	-0.20135
FBgn0030087	10	0.0040224	0.020122	0.981667	12	5	-0.86454	0.45766	0.67041	0.994139	431	1	-0.86454
FBgn0038167	10	0.6669	0.79434	0.987695	514	1	-0.64223	0.45883	0.67152	0.994139	432	3	-0.64223
FBgn0030686	10	0.33915	0.55649	0.987695	348	3	-0.10029	0.45994	0.67255	0.994139	433	2	-0.10029
FBgn0262866	9	0.672	0.78801	0.987695	517	1	-0.91802	0.4627	0.66591	0.994139	434	2	-0.91802
FBgn0003448	10	0.37674	0.59183	0.987695	367	3	-0.059968	0.46971	0.68072	0.994139	435	3	-0.059968
FBgn0263987	5	0.15979	0.27798	0.987695	227	2	-0.17428	0.4698	0.5793	0.987858	436	1	-0.17428
FBgn0037516	10	0.31435	0.53262	0.987695	335	3	-0.36424	0.47143	0.68221	0.994139	437	2	-0.36424
FBgn0030559	10	0.15595	0.3464	0.987695	223	4	-0.33401	0.47338	0.68392	0.994139	438	2	-0.33401
FBgn0004895	10	0.47515	0.68348	0.987695	425	2	-0.061439	0.47358	0.68402	0.994139	439	3	-0.061439
FBgn0025549	10	0.044073	0.13931	0.987695	81	4	-0.81293	0.47604	0.68625	0.994139	440	1	-0.81293
FBgn0031214	10	0.068774	0.19904	0.987695	123	3	-0.81994	0.47855	0.68872	0.994139	441	3	-0.81994
FBgn0030507	10	0.8798	0.90059	0.987695	591	1	-0.077537	0.47943	0.68929	0.994139	442	2	-0.077537
FBgn0001108	10	0.98704	0.9877	0.987695	642	0	-0.91802	0.47955	0.68935	0.994139	443	2	-0.91802
FBgn0033095	10	0.080817	0.22525	0.987695	135	4	-0.14538	0.48114	0.69086	0.994139	444	2	-0.14538
FBgn0036489	4	0.82421	0.82593	0.987695	575	0	-0.53197	0.48215	0.52867	0.965817	445	1	-0.53197
FBgn0020440	10	0.80027	0.86921	0.987695	563	1	-0.72988	0.48218	0.69185	0.994139	446	2	-0.72988
FBgn0035483	10	0.005233	0.024812	0.981667	13	5	-0.62319	0.48795	0.69686	0.994139	447	2	-0.62319
FBgn0038332	10	0.011206	0.046819	0.981667	29	6	-0.38249	0.48851	0.69737	0.994139	448	2	-0.38249
FBgn0025115	10	0.18247	0.38591	0.987695	247	3	-0.63355	0.49364	0.70177	0.994139	449	3	-0.63355
FBgn0034936	10	0.010213	0.043306	0.981667	24	2	0.11922	0.49864	0.70657	0.994139	450	3	0.11922
FBgn0036480	7	0.7923	0.80597	0.987695	560	1	-0.91802	0.50021	0.64571	0.989159	451	2	-0.91802
FBgn0039209	10	0.061787	0.18254	0.987695	112	5	-0.30496	0.50275	0.71035	0.994139	452	2	-0.30496
FBgn0017561	10	0.90851	0.91662	0.987695	603	1	-0.32191	0.50339	0.71104	0.994139	453	2	-0.32191
FBgn0025781	10	0.4562	0.66611	0.987695	417	3	0.049357	0.50394	0.71148	0.994139	454	3	0.049357
FBgn0259166	9	0.18148	0.37464	0.987695	246	3	-0.91802	0.50566	0.68983	0.994139	455	1	-0.91802
FBgn0266667	10	0.027283	0.096334	0.987695	61	3	-0.91802	0.50611	0.71343	0.994139	456	1	-0.91802
FBgn0035604	10	0.98704	0.9877	0.987695	629	0	-0.089141	0.50814	0.71513	0.994139	457	3	-0.089141
FBgn0015586	10	0.30442	0.52328	0.987695	326	2	-0.045216	0.51186	0.71817	0.994139	458	3	-0.045216
FBgn0010015	10	0.00036274	0.0024095	0.981667	1	5	-0.56738	0.51227	0.71863	0.994139	459	2	-0.56738
FBgn0015295	10	0.66533	0.79336	0.987695	513	2	0.051361	0.51232	0.71867	0.994139	460	3	0.051361
FBgn0023512	10	0.18266	0.38621	0.987695	248	2	0.093029	0.51337	0.71973	0.994139	461	2	0.093029
FBgn0031042	10	0.44849	0.65869	0.987695	408	2	0.057757	0.51464	0.72089	0.994139	462	3	0.057757
FBgn0038721	10	0.25468	0.4767	0.987695	303	1	-0.91802	0.51603	0.72218	0.994139	463	3	-0.91802
FBgn0026323	10	0.86181	0.89204	0.987695	584	1	-0.58824	0.52297	0.72849	0.994139	464	3	-0.58824
FBgn0016081	10	0.98704	0.9877	0.987695	641	0	-0.13334	0.52757	0.73244	0.994139	465	3	-0.13334
FBgn0264357	10	0.12429	0.29653	0.987695	185	4	-0.09566	0.52849	0.73328	0.994139	466	3	-0.09566
FBgn0014427	10	0.1742	0.3739	0.987695	239	3	-0.049611	0.53064	0.73449	0.994139	467	1	-0.049611
FBgn0264895	8	0.047952	0.13538	0.987695	90	3	-0.24587	0.54539	0.69477	0.994139	468	2	-0.24587
FBgn0038197	4	0.25157	0.37041	0.987695	297	2	0.013432	0.54551	0.57178	0.984739	469	1	0.013432
FBgn0265137	10	0.13401	0.31265	0.987695	194	2	-0.75964	0.54716	0.74203	0.994139	470	2	-0.75964
FBgn0050429	10	0.37359	0.58884	0.987695	365	1	-0.094235	0.55331	0.74469	0.994139	471	2	-0.094235
FBgn0030850	10	0.3063	0.52485	0.987695	328	1	-0.51939	0.5556	0.74583	0.994139	472	1	-0.51939
FBgn0039726	10	0.0037586	0.019083	0.981667	11	6	-0.62808	0.55674	0.7464	0.994139	473	2	-0.62808
FBgn0033569	10	0.051546	0.15746	0.987695	94	5	-0.22101	0.56165	0.74888	0.994139	474	1	-0.22101
FBgn0035709	10	0.26551	0.48655	0.987695	313	1	-0.090721	0.56315	0.74961	0.994139	475	2	-0.090721
FBgn0036398	10	0.52189	0.70943	0.987695	451	2	-0.6414	0.56389	0.74999	0.994139	476	2	-0.6414
FBgn0037592	10	0.40814	0.62187	0.987695	383	3	-0.22382	0.56511	0.75062	0.994139	477	2	-0.22382
FBgn0033272	10	0.12283	0.29422	0.987695	180	4	-0.40691	0.57058	0.75383	0.994139	478	2	-0.40691
FBgn0010395	10	0.024971	0.090337	0.981667	57	3	-0.91802	0.57168	0.75435	0.994139	479	1	-0.91802
FBgn0020224	9	0.34033	0.54562	0.987695	350	3	-0.22661	0.5832	0.73551	0.994139	480	1	-0.22661
FBgn0046332	10	0.50839	0.70189	0.987695	441	2	-0.7777	0.58461	0.76102	0.994139	481	2	-0.7777
FBgn0037606	10	0.17382	0.37344	0.987695	238	3	-0.48186	0.58653	0.7618	0.994139	482	2	-0.48186
FBgn0036876	10	0.51254	0.70411	0.987695	446	2	-0.070029	0.59116	0.76409	0.994139	483	2	-0.070029
FBgn0032749	10	0.092798	0.24541	0.987695	148	4	-0.67806	0.59267	0.76478	0.994139	484	2	-0.67806
FBgn0030761	10	0.079371	0.22286	0.987695	134	4	-0.076079	0.59567	0.76637	0.994139	485	2	-0.076079
FBgn0035627	10	0.90353	0.91354	0.987695	600	1	-0.045507	0.59641	0.76664	0.994139	486	1	-0.045507
FBgn0036282	8	0.43817	0.6054	0.987695	405	1	-0.91802	0.59769	0.7329	0.994139	487	1	-0.91802
FBgn0039115	10	0.3097	0.52823	0.987695	330	3	-0.24699	0.5985	0.76756	0.994139	488	2	-0.24699
FBgn0259189	10	0.08773	0.2366	0.987695	143	4	-0.34174	0.59865	0.7676	0.994139	489	2	-0.34174
FBgn0011474	10	0.16795	0.36482	0.987695	236	4	-0.55415	0.59919	0.76791	0.994139	490	2	-0.55415
FBgn0038715	10	0.37578	0.5907	0.987695	366	3	-0.69237	0.61191	0.77422	0.994139	491	2	-0.69237
FBgn0029147	10	0.0066294	0.030155	0.981667	18	5	-0.70239	0.61385	0.77533	0.994139	492	2	-0.70239
FBgn0014141	10	0.25291	0.47497	0.987695	298	3	-0.63543	0.61385	0.77533	0.994139	493	2	-0.63543
FBgn0016794	9	0.075928	0.20077	0.987695	129	3	-0.65408	0.61514	0.75474	0.994139	494	2	-0.65408
FBgn0283499	10	0.016452	0.064531	0.981667	40	2	-0.34497	0.61552	0.77628	0.994139	495	2	-0.34497
FBgn0028563	10	0.98704	0.9877	0.987695	631	0	0.015359	0.61885	0.77795	0.994139	496	2	0.015359
FBgn0026090	10	0.097517	0.25316	0.987695	152	4	-0.57058	0.62017	0.7786	0.994139	497	2	-0.57058
FBgn0030964	10	0.00078899	0.0044973	0.981667	2	3	-0.80936	0.63445	0.78667	0.994139	498	2	-0.80936
FBgn0025469	10	0.36697	0.5826	0.987695	361	3	-0.22014	0.63692	0.78782	0.994139	499	2	-0.22014
FBgn0004507	10	0.001546	0.0083069	0.981667	3	6	-0.43827	0.63692	0.78782	0.994139	500	2	-0.43827
FBgn0030449	10	0.41297	0.62614	0.987695	388	3	-0.19997	0.63692	0.78782	0.994139	501	2	-0.19997
FBgn0259146	10	0.054902	0.16601	0.987695	103	5	-0.64573	0.64141	0.79032	0.994139	502	1	-0.64573
FBgn0035059	10	0.05532	0.16709	0.987695	105	4	-0.47796	0.64825	0.79405	0.994139	503	2	-0.47796
FBgn0037828	10	0.15065	0.33806	0.987695	216	3	-0.67351	0.64948	0.79473	0.994139	504	1	-0.67351
FBgn0052633	10	0.070086	0.20204	0.987695	125	3	-0.24669	0.6501	0.79508	0.994139	505	1	-0.24669
FBgn0037536	10	0.61796	0.76421	0.987695	492	2	-0.1393	0.65143	0.79569	0.994139	506	2	-0.1393
FBgn0012058	10	0.98704	0.9877	0.987695	649	0	-0.18912	0.65888	0.79964	0.994139	507	2	-0.18912
FBgn0030623	10	0.083505	0.22973	0.987695	137	3	-0.20238	0.65888	0.79964	0.994139	508	2	-0.20238
FBgn0039941	10	0.17766	0.37887	0.987695	242	4	-0.30191	0.65888	0.79964	0.994139	509	2	-0.30191
FBgn0000038	10	0.37876	0.59368	0.987695	369	3	-0.10214	0.66489	0.8029	0.994139	510	2	-0.10214
FBgn0053159	10	0.052584	0.15988	0.987695	98	4	-0.35429	0.66572	0.80338	0.994139	511	2	-0.35429
FBgn0025807	10	0.54511	0.72184	0.987695	461	2	-0.91802	0.67084	0.80613	0.994139	512	2	-0.91802
FBgn0031972	10	0.64709	0.78214	0.987695	505	2	-0.23364	0.67099	0.80624	0.994139	513	2	-0.23364
FBgn0033733	10	0.17669	0.3774	0.987695	240	2	-0.22771	0.67959	0.8111	0.994139	514	1	-0.22771
FBgn0003984	10	0.018495	0.071636	0.981667	47	5	-0.63187	0.67959	0.8111	0.994139	515	2	-0.63187
FBgn0063495	10	0.98704	0.9877	0.987695	627	0	-0.15911	0.67959	0.8111	0.994139	516	2	-0.15911
FBgn0267487	10	0.45817	0.6678	0.987695	419	2	-0.62939	0.67959	0.8111	0.994139	517	2	-0.62939
FBgn0030620	10	0.0055111	0.02595	0.981667	15	4	-0.1697	0.68273	0.81298	0.994139	518	2	-0.1697
FBgn0022213	10	0.27028	0.49094	0.987695	316	1	-0.03577	0.69454	0.81986	0.994139	519	2	-0.03577
FBgn0038331	10	0.37336	0.58854	0.987695	364	3	-0.5855	0.69723	0.82149	0.994139	520	2	-0.5855
FBgn0037081	10	0.15957	0.35196	0.987695	226	4	-0.22727	0.70033	0.82351	0.994139	521	2	-0.22727
FBgn0015300	10	0.19573	0.40525	0.987695	257	2	-0.12658	0.70525	0.82633	0.994139	522	1	-0.12658
FBgn0033471	10	0.70208	0.81788	0.987695	530	1	-0.094756	0.70787	0.82783	0.994139	523	1	-0.094756
FBgn0051199	10	0.50004	0.6973	0.987695	439	2	-0.74745	0.71253	0.83078	0.994139	524	1	-0.74745
FBgn0041627	10	0.033	0.1109	0.987695	69	3	-0.31073	0.71784	0.83409	0.994139	525	2	-0.31073
FBgn0262739	7	0.052376	0.14287	0.987695	97	3	-0.41714	0.72264	0.77857	0.994139	526	1	-0.41714
FBgn0038247	10	0.42947	0.64116	0.987695	401	2	-0.086506	0.72265	0.83682	0.994139	527	1	-0.086506
FBgn0010389	10	0.064141	0.18824	0.987695	115	4	-0.39848	0.72611	0.83882	0.994139	528	2	-0.39848
FBgn0000326	10	0.011166	0.046641	0.981667	28	6	-0.45241	0.72929	0.84074	0.994139	529	1	-0.45241
FBgn0030293	10	0.054646	0.16538	0.987695	102	4	-0.2897	0.7293	0.84075	0.994139	530	2	-0.2897
FBgn0035090	10	0.088862	0.23852	0.987695	145	3	-0.23216	0.73292	0.84309	0.994139	531	2	-0.23216
FBgn0030716	10	0.19847	0.40928	0.987695	261	3	-0.9165	0.7334	0.8434	0.994139	532	2	-0.9165
FBgn0031765	10	0.26192	0.4834	0.987695	307	1	-0.3271	0.73444	0.84403	0.994139	533	2	-0.3271
FBgn0033685	10	0.36839	0.58385	0.987695	362	2	-0.12079	0.73726	0.84584	0.994139	534	2	-0.12079
FBgn0039270	10	0.10678	0.26881	0.987695	164	2	-0.055122	0.73838	0.84648	0.994139	535	2	-0.055122
FBgn0270924	10	0.91456	0.92041	0.987695	606	1	-0.088495	0.73864	0.84668	0.994139	536	2	-0.088495
FBgn0036274	10	0.19238	0.40069	0.987695	254	3	-0.62469	0.74099	0.84839	0.994139	537	2	-0.62469
FBgn0039734	10	0.0070807	0.031748	0.981667	20	4	-0.35158	0.74192	0.84897	0.994139	538	2	-0.35158
FBgn0039747	10	0.88155	0.90143	0.987695	592	1	0.042036	0.74797	0.85283	0.994139	539	2	0.042036
FBgn0035469	10	0.98704	0.9877	0.987695	646	0	-0.0065268	0.75267	0.85566	0.994139	540	2	-0.0065268
FBgn0083961	10	0.19636	0.40625	0.987695	258	4	-0.33785	0.7538	0.85636	0.994139	541	1	-0.33785
FBgn0039924	10	0.35149	0.56833	0.987695	354	2	-0.91802	0.7538	0.85636	0.994139	542	1	-0.91802
FBgn0270928	10	0.20937	0.42568	0.987695	272	3	-0.034923	0.75624	0.85772	0.994139	543	2	-0.034923
FBgn0014859	10	0.14068	0.32282	0.987695	204	4	-0.34443	0.75669	0.85806	0.994139	544	1	-0.34443
FBgn0029858	10	0.12283	0.29422	0.987695	181	4	-0.33661	0.75837	0.85909	0.994139	545	2	-0.33661
FBgn0039357	10	0.24001	0.46275	0.987695	290	1	-0.91802	0.75978	0.86003	0.994139	546	2	-0.91802
FBgn0259190	10	0.045101	0.14192	0.987695	85	4	-0.18825	0.76188	0.86144	0.994139	547	2	-0.18825
FBgn0032763	10	0.02251	0.084044	0.981667	53	5	-0.35214	0.76258	0.86193	0.994139	548	2	-0.35214
FBgn0033935	10	0.35171	0.56853	0.987695	355	2	-0.32285	0.76303	0.86221	0.994139	549	1	-0.32285
FBgn0031194	10	0.31926	0.53738	0.987695	340	2	-0.91802	0.76397	0.86292	0.994139	550	2	-0.91802
FBgn0034491	10	0.014895	0.059158	0.981667	37	4	-0.51674	0.76604	0.8645	0.994139	551	1	-0.51674
FBgn0038890	10	0.90392	0.91376	0.987695	601	1	-0.18965	0.77319	0.8693	0.994139	552	1	-0.18965
FBgn0027492	10	0.56978	0.73628	0.987695	473	2	-0.91802	0.77444	0.87003	0.994139	553	1	-0.91802
FBgn0259228	10	0.34902	0.5659	0.987695	353	3	-0.38811	0.77522	0.87054	0.994139	554	2	-0.38811
FBgn0030234	10	0.11147	0.27601	0.987695	166	4	-0.60171	0.77731	0.8719	0.994139	555	1	-0.60171
FBgn0030812	10	0.042571	0.1356	0.987695	80	4	-0.14467	0.77789	0.87231	0.994139	556	2	-0.14467
FBgn0259152	10	0.16606	0.36205	0.987695	235	1	-0.095118	0.78217	0.87506	0.994139	557	2	-0.095118
FBgn0030460	2	0.58073	0.58046	0.987695	479	0	-0.55225	0.78747	0.78688	0.994139	558	0	-0.55225
FBgn0026417	10	0.18398	0.38831	0.987695	249	1	-0.075355	0.78801	0.87905	0.994139	559	2	-0.075355
FBgn0024542	10	0.15324	0.34222	0.987695	221	4	-0.51074	0.78849	0.87943	0.994139	560	1	-0.51074
FBgn0039782	10	0.60581	0.757	0.987695	487	2	-0.31576	0.78944	0.88016	0.994139	561	2	-0.31576
FBgn0032235	10	0.62867	0.77043	0.987695	499	1	-0.10964	0.78946	0.88017	0.994139	562	1	-0.10964
FBgn0266411	10	0.61118	0.75996	0.987695	489	2	-0.21298	0.79024	0.8807	0.994139	563	2	-0.21298
FBgn0035887	10	0.56762	0.73484	0.987695	471	2	-0.039538	0.79151	0.88148	0.994139	564	2	-0.039538
FBgn0063667	10	0.029195	0.10093	0.987695	64	3	-0.47805	0.79372	0.88326	0.994139	565	2	-0.47805
FBgn0015570	8	0.5435	0.68559	0.987695	459	1	-0.91802	0.79565	0.83852	0.994139	566	1	-0.91802
FBgn0040871	10	0.013337	0.054082	0.981667	34	4	-0.28033	0.79879	0.88502	0.994139	567	1	-0.28033
FBgn0264574	10	0.0070007	0.031511	0.981667	19	4	-0.91802	0.81286	0.88867	0.994139	568	1	-0.91802
FBgn0005198	3	0.045129	0.086092	0.981667	86	2	-0.47596	0.81595	0.81528	0.994139	569	0	-0.47596
FBgn0036096	10	0.035858	0.1182	0.987695	74	5	-0.74506	0.81667	0.88989	0.994139	570	1	-0.74506
FBgn0266064	10	0.41586	0.62884	0.987695	392	3	-0.5984	0.8267	0.89275	0.994139	571	1	-0.5984
FBgn0263782	8	0.46138	0.62236	0.987695	421	1	-0.18011	0.82943	0.85523	0.994139	572	1	-0.18011
FBgn0033677	6	0.22844	0.37741	0.987695	284	2	-0.56311	0.8363	0.83655	0.994139	573	1	-0.56311
FBgn0024846	10	0.65859	0.78912	0.987695	509	1	-0.058191	0.83778	0.89577	0.994139	574	1	-0.058191
FBgn0036206	10	0.059138	0.17627	0.987695	110	2	-0.60829	0.83809	0.8959	0.994139	575	1	-0.60829
FBgn0031561	9	0.34033	0.54562	0.987695	349	3	-0.5087	0.83956	0.8752	0.994139	576	1	-0.5087
FBgn0004864	10	0.030358	0.10392	0.987695	65	2	-0.91802	0.84278	0.89732	0.994139	577	1	-0.91802
FBgn0029870	10	0.85529	0.88943	0.987695	583	1	-0.03022	0.84647	0.89863	0.994139	578	1	-0.03022
FBgn0262103	10	0.58725	0.74635	0.987695	482	1	0.074642	0.84749	0.899	0.994139	579	1	0.074642
FBgn0034363	10	0.5624	0.73149	0.987695	468	1	-0.69644	0.85165	0.90041	0.994139	580	1	-0.69644
FBgn0261832	10	0.47858	0.68608	0.987695	427	2	-0.69065	0.85695	0.90214	0.994139	581	1	-0.69065
FBgn0011826	10	0.010828	0.045473	0.981667	26	5	-0.9124	0.86445	0.90443	0.994139	582	1	-0.9124
FBgn0032499	10	0.0725	0.20704	0.987695	126	2	-0.1013	0.86652	0.90514	0.994139	583	1	-0.1013
FBgn0042627	10	0.4188	0.63131	0.987695	394	3	-0.12896	0.87874	0.91007	0.994139	584	1	-0.12896
FBgn0260768	10	0.98704	0.9877	0.987695	647	0	-0.53148	0.88441	0.91239	0.994139	585	1	-0.53148
FBgn0027101	10	0.93032	0.93175	0.987695	613	1	-0.61795	0.88486	0.91263	0.994139	586	1	-0.61795
FBgn0031897	10	0.0019026	0.010197	0.981667	4	7	-0.59759	0.88565	0.91285	0.994139	587	1	-0.59759
FBgn0030018	8	0.60139	0.73211	0.987695	486	2	0.059126	0.8876	0.89148	0.994139	588	1	0.059126
FBgn0051902	10	0.20951	0.42593	0.987695	273	3	-0.7851	0.88842	0.91401	0.994139	589	1	-0.7851
FBgn0260634	10	0.16101	0.35416	0.987695	229	3	-0.28756	0.8893	0.91446	0.994139	590	1	-0.28756
FBgn0000565	10	0.026619	0.094553	0.987695	59	5	-0.50873	0.89103	0.9153	0.994139	591	1	-0.50873
FBgn0035336	10	0.017332	0.067786	0.981667	41	5	-0.53059	0.89231	0.9158	0.994139	592	1	-0.53059
FBgn0052568	10	0.19132	0.39929	0.987695	253	4	-0.73426	0.89821	0.91848	0.994139	593	1	-0.73426
FBgn0034187	10	0.92249	0.92585	0.987695	608	1	-0.2185	0.89821	0.91848	0.994139	594	1	-0.2185
FBgn0031216	6	0.1276	0.25782	0.987695	190	1	-0.91802	0.90062	0.90011	0.994139	595	0	-0.91802
FBgn0029893	10	0.29486	0.51435	0.987695	323	2	-0.65105	0.90149	0.91995	0.994139	596	1	-0.65105
FBgn0250823	10	0.058811	0.17543	0.987695	109	3	-0.68534	0.90685	0.92258	0.994139	597	1	-0.68534
FBgn0040098	10	0.50861	0.70202	0.987695	444	1	-0.91802	0.9075	0.9229	0.994139	598	1	-0.91802
FBgn0035703	10	0.32759	0.54537	0.987695	343	3	-0.14147	0.90924	0.92386	0.994139	599	1	-0.14147
FBgn0038258	10	0.017845	0.069548	0.981667	42	4	-0.65981	0.91158	0.92504	0.994139	600	1	-0.65981
FBgn0029840	10	0.09704	0.25232	0.987695	151	3	-0.30569	0.91282	0.9256	0.994139	601	1	-0.30569
FBgn0039043	10	0.11454	0.28096	0.987695	169	3	-0.50407	0.91465	0.92645	0.994139	602	1	-0.50407
FBgn0031183	10	0.13623	0.31605	0.987695	197	4	-0.33184	0.91508	0.92664	0.994139	603	1	-0.33184
FBgn0053506	10	0.11488	0.28141	0.987695	170	3	-0.33279	0.9182	0.92834	0.994139	604	1	-0.33279
FBgn0034858	10	0.065841	0.19245	0.987695	119	5	-0.34133	0.9182	0.92834	0.994139	605	1	-0.34133
FBgn0032691	8	0.4588	0.62048	0.987695	420	1	-0.91802	0.91943	0.91886	0.994139	606	0	-0.91802
FBgn0052333	10	0.45214	0.66227	0.987695	411	3	-0.52718	0.92089	0.93007	0.994139	607	1	-0.52718
FBgn0037327	9	0.40445	0.61142	0.987695	379	2	-0.14836	0.92587	0.92515	0.994139	608	1	-0.14836
FBgn0034964	10	0.41105	0.62436	0.987695	386	3	-0.26031	0.92725	0.9337	0.994139	609	1	-0.26031
FBgn0036039	10	0.039029	0.12658	0.987695	77	4	-0.66793	0.92755	0.93388	0.994139	610	1	-0.66793
FBgn0050094	10	0.4622	0.67159	0.987695	422	2	-0.82064	0.92873	0.93471	0.994139	611	1	-0.82064
FBgn0086442	10	0.057869	0.17315	0.987695	108	4	-0.28792	0.92873	0.93471	0.994139	612	1	-0.28792
FBgn0003731	10	0.027362	0.096532	0.987695	62	4	-0.33865	0.92989	0.9354	0.994139	613	1	-0.33865
FBgn0034142	6	0.15265	0.29747	0.987695	220	2	-0.9137	0.93832	0.93824	0.994139	614	0	-0.9137
FBgn0034996	10	0.012795	0.052221	0.981667	32	4	-0.91802	0.94197	0.94445	0.994139	615	1	-0.91802
FBgn0036187	10	0.68633	0.80719	0.987695	522	1	-0.40414	0.94366	0.94566	0.994139	616	1	-0.40414
FBgn0037889	10	0.39602	0.61068	0.987695	375	1	-0.054241	0.94448	0.9464	0.994139	617	1	-0.054241
FBgn0037672	10	0.0099301	0.042267	0.981667	23	6	-0.62342	0.94483	0.9467	0.994139	618	1	-0.62342
FBgn0010379	10	0.06551	0.19166	0.987695	118	5	-0.54175	0.94541	0.94717	0.994139	619	1	-0.54175
FBgn0260972	10	0.28782	0.5074	0.987695	321	3	-0.87376	0.94811	0.94926	0.994139	620	1	-0.87376
FBgn0004919	10	0.35745	0.57378	0.987695	357	3	-0.1954	0.95027	0.95113	0.994139	621	1	-0.1954
FBgn0266347	9	0.26473	0.46381	0.987695	312	3	-0.38186	0.95116	0.94988	0.994139	622	0	-0.38186
FBgn0037074	10	0.2022	0.41501	0.987695	264	2	-0.29672	0.95205	0.95283	0.994139	623	1	-0.29672
FBgn0029117	10	0.12145	0.29183	0.987695	179	2	-0.65033	0.95781	0.95843	0.994139	624	0	-0.65033
FBgn0016930	10	0.049701	0.15296	0.987695	93	5	-0.51127	0.95781	0.95843	0.994139	625	0	-0.51127
FBgn0261858	10	0.32554	0.54347	0.987695	342	3	-0.28781	0.95956	0.96022	0.994139	626	0	-0.28781
FBgn0015039	10	0.019857	0.076474	0.981667	50	5	-0.35931	0.96171	0.96243	0.994139	627	0	-0.35931
FBgn0030992	10	0.98704	0.9877	0.987695	643	0	-0.072881	0.96179	0.96252	0.994139	628	0	-0.072881
FBgn0029834	10	0.0082618	0.036181	0.981667	21	6	-0.24413	0.96266	0.96333	0.994139	629	0	-0.24413
FBgn0262733	10	0.16373	0.35865	0.987695	232	4	-0.43262	0.96399	0.96475	0.994139	630	0	-0.43262
FBgn0263656	10	0.20661	0.42137	0.987695	268	4	-0.39139	0.96407	0.9648	0.994139	631	0	-0.39139
FBgn0052425	10	0.051774	0.15796	0.987695	96	3	-0.80149	0.96539	0.9661	0.994139	632	0	-0.80149
FBgn0003499	10	0.015857	0.062502	0.981667	39	4	-0.63901	0.96577	0.96644	0.994139	633	0	-0.63901
FBgn0028476	10	0.41383	0.62695	0.987695	389	3	-0.68282	0.96733	0.96805	0.994139	634	0	-0.68282
FBgn0034715	10	0.84352	0.88458	0.987695	581	1	-0.19469	0.96844	0.96902	0.994139	635	0	-0.19469
FBgn0086358	10	0.068338	0.19822	0.987695	122	2	-0.91802	0.97134	0.97192	0.994139	636	0	-0.91802
FBgn0003892	10	0.13844	0.31947	0.987695	202	4	-0.49135	0.97238	0.97297	0.994139	637	0	-0.49135
FBgn0026136	10	0.23531	0.45832	0.987695	288	3	-0.29772	0.97306	0.97357	0.994139	638	0	-0.29772
FBgn0085459	10	0.68719	0.80766	0.987695	523	2	-0.8621	0.97385	0.97432	0.994139	639	0	-0.8621
FBgn0015277	10	0.63972	0.77754	0.987695	503	2	-0.73055	0.97566	0.97632	0.994622	640	0	-0.73055
FBgn0031681	10	0.44137	0.65226	0.987695	407	3	-0.38814	0.98224	0.98275	0.99587	641	0	-0.38814
FBgn0260779	10	0.1353	0.31466	0.987695	195	3	-0.30018	0.9832	0.98379	0.99587	642	0	-0.30018
FBgn0003256	10	0.76774	0.85972	0.987695	553	1	-0.91802	0.98536	0.98609	0.99587	643	0	-0.91802
FBgn0031195	10	0.10053	0.25841	0.987695	156	4	-0.44943	0.98564	0.98635	0.99587	644	0	-0.44943
FBgn0002774	10	0.035692	0.11786	0.987695	73	5	-0.91802	0.98576	0.98651	0.99587	645	0	-0.91802
FBgn0031461	10	0.0063092	0.029017	0.981667	17	5	-0.34494	0.98596	0.98671	0.99587	646	0	-0.34494
FBgn0034317	10	0.024971	0.090337	0.981667	58	4	-0.77376	0.9885	0.98899	0.996635	647	0	-0.77376
FBgn0038830	10	0.61868	0.76462	0.987695	494	2	-0.64314	0.99258	0.99303	0.999159	648	0	-0.64314
FBgn0000464	10	0.42651	0.63833	0.987695	398	3	-0.80782	0.99686	0.997	0.999301	649	0	-0.80782
FBgn0038598	10	0.14537	0.32991	0.987695	208	4	-0.59601	0.99709	0.99721	0.999301	650	0	-0.59601
FBgn0035496	10	0.2043	0.41813	0.987695	266	4	-0.73182	0.99762	0.99777	0.999301	651	0	-0.73182
FBgn0024332	8	0.027219	0.09014	0.981667	60	4	-0.91802	0.99976	0.99971	0.999708	652	0	-0.91802

## Sheet: S1E-0.1 rapa-30d
id	num	neg|score	neg|p-value	neg|fdr	neg|rank	neg|goodsgrna	neg|lfc	pos|score	pos|p-value	pos|fdr	pos|rank	pos|goodsgrna	pos|lfc
FBgn0034783	10	0.94553	0.94752	0.994663	614	1	0.46645	5.0285e-05	0.00046012	0.13871	1	5	0.46645
FBgn0033913	10	0.53621	0.73839	0.98102	482	1	0.095102	5.5145e-05	0.00051949	0.13871	2	5	0.095102
FBgn0036451	10	0.37214	0.59756	0.98102	378	3	0.77177	7.0269e-05	0.00063823	0.13871	3	6	0.77177
FBgn0024740	10	0.30504	0.53967	0.98102	343	3	-0.4175	0.00078899	0.0047546	0.749628	4	4	-0.4175
FBgn0034356	10	0.92784	0.93444	0.994663	603	1	0.40359	0.0014454	0.0079804	0.749628	5	7	0.40359
FBgn0036118	10	0.42591	0.64376	0.98102	406	2	0.70147	0.0016004	0.0088611	0.749628	6	7	0.70147
FBgn0031662	10	0.99272	0.99314	0.994663	634	0	0.62948	0.0022785	0.012245	0.749628	7	7	0.62948
FBgn0051992	10	0.66277	0.80251	0.984068	526	2	0.24879	0.0023503	0.012601	0.749628	8	4	0.24879
FBgn0039726	10	0.52516	0.7305	0.98102	471	2	-0.045336	0.0023653	0.012661	0.749628	9	4	-0.045336
FBgn0037653	10	0.16807	0.37108	0.98102	233	1	0.16945	0.002507	0.013423	0.749628	10	5	0.16945
FBgn0001187	10	0.93146	0.9369	0.994663	606	1	0.42384	0.002532	0.01366	0.749628	11	5	0.42384
FBgn0024329	10	0.2571	0.49254	0.98102	321	2	0.36486	0.0027018	0.014491	0.749628	12	7	0.36486
FBgn0039584	10	0.11266	0.28903	0.98102	178	3	-0.46474	0.0028253	0.014947	0.749628	13	3	-0.46474
FBgn0004657	10	0.47161	0.6827	0.98102	440	2	-0.57756	0.0039393	0.020052	0.854234	14	3	-0.57756
FBgn0037140	10	0.51371	0.72015	0.98102	464	3	0.011245	0.0041305	0.020963	0.854234	15	5	0.011245
FBgn0022382	7	0.05132	0.14178	0.98102	101	1	0.22169	0.0044497	0.018608	0.854234	16	4	0.22169
FBgn0020236	10	0.94553	0.94752	0.994663	613	1	0.22144	0.0046115	0.02314	0.865881	17	7	0.22144
FBgn0034307	10	0.93431	0.93886	0.994663	608	1	0.14637	0.0055111	0.027276	0.865881	18	4	0.14637
FBgn0032934	10	0.053144	0.16434	0.98102	103	2	0.25207	0.0056117	0.027672	0.865881	19	6	0.25207
FBgn0030035	10	0.19444	0.40742	0.98102	260	3	0.12177	0.0057532	0.028147	0.865881	20	5	0.12177
FBgn0035574	8	0.98052	0.98015	0.994663	627	0	0.38033	0.0070291	0.030452	0.865881	21	4	0.38033
FBgn0033266	10	0.0020747	0.011236	0.687903	10	7	-0.42022	0.0070807	0.032946	0.865881	22	1	-0.42022
FBgn0004919	10	0.51199	0.71848	0.98102	463	2	0.17632	0.007134	0.033114	0.865881	23	5	0.17632
FBgn0003371	10	0.90189	0.92076	0.994663	595	1	0.037306	0.0071486	0.033134	0.865881	24	4	0.037306
FBgn0027570	10	0.64915	0.79539	0.984068	524	2	0.20244	0.0073302	0.033876	0.865881	25	5	0.20244
FBgn0003079	10	0.00050902	0.0033099	0.404839	5	4	0.089225	0.0075007	0.034529	0.865881	26	5	0.089225
FBgn0033315	10	0.5971	0.76821	0.981371	504	1	0.51856	0.0084738	0.038071	0.869522	27	6	0.51856
FBgn0020412	10	0.24379	0.4753	0.98102	311	2	0.39241	0.0085522	0.038398	0.869522	28	6	0.39241
FBgn0031040	10	0.95542	0.95589	0.994663	618	1	-0.27042	0.0086481	0.038675	0.869522	29	2	-0.27042
FBgn0028397	10	0.15388	0.35035	0.98102	220	4	0.043901	0.0090602	0.040159	0.872796	30	5	0.043901
FBgn0011300	10	0.0242	0.09103	0.98102	52	3	0.1167	0.010213	0.044266	0.894355	31	3	0.1167
FBgn0265089	10	0.59009	0.76468	0.981371	501	2	0.17021	0.010573	0.045691	0.894355	32	5	0.17021
FBgn0037647	10	0.028822	0.10521	0.98102	64	3	-0.2291	0.011419	0.048422	0.894355	33	4	-0.2291
FBgn0037678	10	0.22205	0.44576	0.98102	289	3	-0.16445	0.011776	0.049471	0.894355	34	3	-0.16445
FBgn0015010	10	0.68493	0.81503	0.984068	537	1	0.21111	0.011896	0.049847	0.894355	35	5	0.21111
FBgn0023213	10	0.35735	0.58494	0.98102	370	2	-0.76989	0.012474	0.051816	0.894355	36	4	-0.76989
FBgn0050046	10	0.30403	0.53888	0.98102	342	2	0.35624	0.013218	0.054458	0.894355	37	6	0.35624
FBgn0030071	10	0.4149	0.63469	0.98102	401	3	-0.069594	0.013337	0.054824	0.894355	38	4	-0.069594
FBgn0035143	9	0.25143	0.4637	0.98102	317	3	-0.07326	0.013416	0.054636	0.894355	39	2	-0.07326
FBgn0053159	10	0.39123	0.61456	0.98102	388	2	0.31311	0.014022	0.05705	0.894355	40	5	0.31311
FBgn0036827	10	0.0023653	0.012661	0.687903	12	1	0.35212	0.014117	0.057347	0.894355	41	5	0.35212
FBgn0034687	10	0.021107	0.080789	0.98102	47	2	0.27698	0.014537	0.058713	0.894355	42	5	0.27698
FBgn0038681	10	0.91456	0.92693	0.994663	599	1	0.097911	0.014716	0.059178	0.894355	43	4	0.097911
FBgn0061469	10	0.094391	0.2561	0.98102	159	2	0.1335	0.015059	0.060355	0.894355	44	4	0.1335
FBgn0030680	10	0.12567	0.3086	0.98102	197	2	-0.37184	0.016372	0.064759	0.896651	45	3	-0.37184
FBgn0259152	10	0.019557	0.075703	0.98102	45	4	-0.72434	0.016452	0.065036	0.896651	46	2	-0.72434
FBgn0046689	10	0.79841	0.886	0.990865	574	1	0.32555	0.016544	0.065332	0.896651	47	6	0.32555
FBgn0036671	10	0.58188	0.76078	0.981371	498	2	-0.088484	0.016861	0.066401	0.896651	48	2	-0.088484
FBgn0264357	10	0.093596	0.25439	0.98102	157	5	0.013398	0.017246	0.067846	0.896651	49	4	0.013398
FBgn0012058	10	0.99272	0.99314	0.994663	630	0	-0.10819	0.017767	0.069696	0.896651	50	4	-0.10819
FBgn0032372	10	0.074298	0.21263	0.98102	127	5	-0.44467	0.018006	0.070448	0.896651	51	3	-0.44467
FBgn0000039	10	0.99272	0.99314	0.994663	633	0	0.44772	0.019346	0.074891	0.896651	52	6	0.44772
FBgn0030964	10	0.47618	0.68671	0.98102	442	3	-0.38391	0.019401	0.075049	0.896651	53	3	-0.38391
FBgn0033574	10	0.63826	0.78974	0.984068	518	2	0.44786	0.01959	0.075861	0.896651	54	6	0.44786
FBgn0027101	10	0.75647	0.85819	0.990865	556	1	-0.63887	0.020664	0.079572	0.896651	55	4	-0.63887
FBgn0034249	10	0.20862	0.42735	0.98102	275	2	-0.12711	0.022677	0.086162	0.896651	56	3	-0.12711
FBgn0002773	10	0.40446	0.62588	0.98102	394	3	-0.076125	0.022933	0.086943	0.896651	57	2	-0.076125
FBgn0283536	10	0.3767	0.60161	0.98102	381	2	-0.97179	0.023427	0.088695	0.896651	58	3	-0.97179
FBgn0038167	10	0.46741	0.67906	0.98102	437	2	-0.68825	0.023427	0.088695	0.896651	59	3	-0.68825
FBgn0040871	10	0.92829	0.93485	0.994663	604	1	0.19519	0.02359	0.089209	0.896651	60	6	0.19519
FBgn0029979	10	0.43684	0.65324	0.98102	420	1	-0.85733	0.024214	0.09105	0.896651	61	2	-0.85733
FBgn0001179	10	0.29897	0.53456	0.98102	338	3	-0.39431	0.024214	0.09105	0.896651	62	4	-0.39431
FBgn0042711	10	0.085691	0.23739	0.98102	146	3	0.0017538	0.024214	0.09105	0.896651	63	3	0.0017538
FBgn0028530	10	0.38592	0.60984	0.98102	385	1	0.26638	0.024597	0.092326	0.896651	64	5	0.26638
FBgn0014859	10	0.99272	0.99314	0.994663	629	0	0.18342	0.025025	0.093662	0.896651	65	6	0.18342
FBgn0030305	10	0.99951	0.99956	0.99956	652	0	0.18922	0.025098	0.09385	0.896651	66	6	0.18922
FBgn0262870	10	0.81564	0.89052	0.992705	576	1	-0.075512	0.02582	0.096205	0.896651	67	4	-0.075512
FBgn0040234	10	0.040728	0.13496	0.98102	80	4	0.010107	0.02605	0.096898	0.896651	68	4	0.010107
FBgn0259168	10	0.045909	0.14778	0.98102	87	3	-0.68842	0.027283	0.10088	0.896651	69	2	-0.68842
FBgn0030505	10	0.1509	0.34583	0.98102	218	3	0.13813	0.02752	0.10155	0.896651	70	4	0.13813
FBgn0261524	9	0.76399	0.85118	0.990865	558	1	0.10358	0.028837	0.09762	0.896651	71	3	0.10358
FBgn0035082	10	0.008566	0.038467	0.98102	25	4	-0.95796	0.030358	0.10879	0.896651	72	1	-0.95796
FBgn0053100	10	0.12494	0.30747	0.98102	196	4	-0.039044	0.031377	0.11131	0.896651	73	4	-0.039044
FBgn0031830	10	0.25103	0.48486	0.98102	316	2	-0.2332	0.031425	0.11149	0.896651	74	5	-0.2332
FBgn0034964	10	0.15827	0.35643	0.98102	223	3	-0.20734	0.031934	0.11277	0.896651	75	4	-0.20734
FBgn0264298	10	0.77656	0.87152	0.990865	565	2	0.081954	0.032347	0.11396	0.896651	76	4	0.081954
FBgn0001108	10	0.7879	0.87903	0.990865	569	1	-0.97179	0.032673	0.11475	0.896651	77	3	-0.97179
FBgn0000565	10	0.68185	0.81312	0.984068	536	1	0.069728	0.032987	0.11551	0.896651	78	5	0.069728
FBgn0033272	10	0.47713	0.68768	0.98102	444	3	0.27779	0.033361	0.11656	0.896651	79	5	0.27779
FBgn0053169	10	0.71148	0.83062	0.990865	544	2	-0.29131	0.034277	0.11878	0.896651	80	3	-0.29131
FBgn0266411	10	0.010605	0.045809	0.98102	28	4	-0.31768	0.034744	0.11991	0.896651	81	4	-0.31768
FBgn0015828	10	0.78992	0.88051	0.990865	570	2	0.084387	0.036303	0.12393	0.896651	82	5	0.084387
FBgn0035769	10	0.81616	0.89069	0.992705	577	1	0.23017	0.037432	0.12671	0.896651	83	5	0.23017
FBgn0052633	10	0.41345	0.63342	0.98102	400	3	-0.37237	0.03877	0.13003	0.896651	84	3	-0.37237
FBgn0035522	10	0.35201	0.58057	0.98102	367	3	-0.57745	0.03877	0.13003	0.896651	85	1	-0.57745
FBgn0041094	10	0.90563	0.92245	0.994663	596	1	-0.11361	0.039288	0.13138	0.896651	86	5	-0.11361
FBgn0000489	10	0.99272	0.99314	0.994663	639	0	0.14802	0.03951	0.13186	0.896651	87	4	0.14802
FBgn0032820	10	0.96004	0.96065	0.994663	623	0	-0.93271	0.039823	0.13258	0.896651	88	3	-0.93271
FBgn0036962	10	0.78704	0.87852	0.990865	567	2	-0.1708	0.040177	0.13341	0.896651	89	3	-0.1708
FBgn0031897	10	0.45788	0.67098	0.98102	432	2	0.084253	0.041344	0.13615	0.896651	90	5	0.084253
FBgn0039153	10	0.34007	0.57021	0.98102	360	3	-0.14352	0.042907	0.14017	0.896651	91	3	-0.14352
FBgn0085384	10	0.28208	0.51947	0.98102	333	1	-0.1388	0.043532	0.14172	0.896651	92	4	-0.1388
FBgn0014011	10	0.86128	0.90423	0.994663	588	1	0.104	0.04356	0.14179	0.896651	93	5	0.104
FBgn0032700	10	0.20713	0.42505	0.98102	274	3	-0.098564	0.044088	0.14308	0.896651	94	3	-0.098564
FBgn0033199	10	0.036482	0.12464	0.98102	73	3	-0.76255	0.04416	0.14321	0.896651	95	3	-0.76255
FBgn0052311	10	0.53708	0.73877	0.98102	483	2	0.16386	0.044394	0.14386	0.896651	96	4	0.16386
FBgn0034179	8	0.85844	0.87203	0.990865	583	1	0.19268	0.044984	0.13472	0.896651	97	4	0.19268
FBgn0001217	10	0.53124	0.73574	0.98102	478	3	-0.12647	0.045603	0.14697	0.896651	98	2	-0.12647
FBgn0038332	10	0.31057	0.5445	0.98102	345	2	0.43008	0.046994	0.1502	0.896651	99	5	0.43008
FBgn0031463	10	0.073381	0.21053	0.98102	124	5	-0.38458	0.047846	0.15211	0.896651	100	4	-0.38458
FBgn0026379	10	0.0070807	0.032975	0.895833	24	4	-0.032199	0.047871	0.15214	0.896651	101	2	-0.032199
FBgn0036695	10	0.371	0.59639	0.98102	377	1	0.16924	0.047997	0.15233	0.896651	102	5	0.16924
FBgn0028983	10	0.00012005	0.00092519	0.201075	3	4	0.15025	0.04801	0.15234	0.896651	103	4	0.15025
FBgn0033917	10	0.95684	0.95741	0.994663	620	0	0.19098	0.048568	0.15348	0.896651	104	3	0.19098
FBgn0034350	9	0.63673	0.76914	0.981371	517	2	0.44933	0.049143	0.15088	0.896651	105	5	0.44933
FBgn0265193	10	0.59915	0.7691	0.981371	507	2	0.35602	0.049495	0.15563	0.896651	106	5	0.35602
FBgn0036932	10	0.14292	0.33405	0.98102	211	3	0.17286	0.049701	0.15613	0.896651	107	5	0.17286
FBgn0004784	10	0.24136	0.47198	0.98102	306	2	0.31755	0.050185	0.1572	0.896651	108	5	0.31755
FBgn0000036	10	0.17057	0.37464	0.98102	237	3	0.058275	0.051187	0.15965	0.896651	109	3	0.058275
FBgn0042137	10	0.51464	0.72102	0.98102	465	3	0.10777	0.05164	0.16066	0.896651	110	4	0.10777
FBgn0002174	10	0.68493	0.81503	0.984068	538	2	-0.21888	0.053144	0.16423	0.896651	111	3	-0.21888
FBgn0031006	2	0.85939	0.85991	0.990865	585	0	0.53986	0.053718	0.095275	0.896651	112	1	0.53986
FBgn0261858	10	0.99272	0.99314	0.994663	640	0	0.17344	0.054024	0.16674	0.896651	113	5	0.17344
FBgn0030342	10	0.26551	0.50313	0.98102	329	3	-0.18969	0.054646	0.16825	0.896651	114	4	-0.18969
FBgn0005775	10	0.072382	0.20831	0.98102	123	3	-0.079357	0.054949	0.16898	0.896651	115	2	-0.079357
FBgn0035469	10	0.17207	0.37664	0.98102	239	2	0.18208	0.054976	0.16908	0.896651	116	5	0.18208
FBgn0000382	10	0.14182	0.3326	0.98102	209	2	0.053885	0.056145	0.17189	0.896651	117	4	0.053885
FBgn0029147	10	0.2286	0.45473	0.98102	297	3	-0.32302	0.056386	0.17249	0.896651	118	5	-0.32302
FBgn0037156	9	0.14981	0.33283	0.98102	216	4	-0.17632	0.057437	0.1713	0.896651	119	3	-0.17632
FBgn0028476	10	0.70604	0.82733	0.990865	542	1	-0.40551	0.058815	0.17795	0.896651	120	5	-0.40551
FBgn0021742	10	0.045645	0.14716	0.98102	86	5	-0.48778	0.05943	0.17936	0.896651	121	3	-0.48778
FBgn0029999	7	0.96813	0.96849	0.994663	626	0	0.31112	0.059737	0.15992	0.896651	122	3	0.31112
FBgn0270928	10	0.016905	0.06653	0.98102	40	4	0.12587	0.059885	0.18048	0.896651	123	3	0.12587
FBgn0086359	10	0.40626	0.62752	0.98102	396	2	-0.53237	0.060012	0.1808	0.896651	124	4	-0.53237
FBgn0037081	10	0.57029	0.75498	0.981371	492	2	0.058452	0.06076	0.18257	0.896651	125	5	0.058452
FBgn0040368	10	0.040533	0.13441	0.98102	79	4	-0.23384	0.061339	0.18383	0.896651	126	4	-0.23384
FBgn0019990	10	0.95712	0.95764	0.994663	621	0	0.2138	0.062264	0.18601	0.896651	127	5	0.2138
FBgn0031875	10	0.19549	0.40879	0.98102	262	4	-0.17553	0.062274	0.18604	0.896651	128	3	-0.17553
FBgn0262866	9	0.024589	0.086617	0.98102	53	1	-0.97179	0.065638	0.19067	0.896651	129	2	-0.97179
FBgn0039064	10	0.79522	0.88436	0.990865	571	1	0.16024	0.066172	0.19505	0.896651	130	5	0.16024
FBgn0026179	10	0.54962	0.7444	0.981371	488	2	-0.059325	0.066583	0.19602	0.896651	131	4	-0.059325
FBgn0052202	10	0.96004	0.96065	0.994663	624	0	-0.50425	0.066607	0.19605	0.896651	132	3	-0.50425
FBgn0264959	10	0.10158	0.27125	0.98102	169	1	0.20091	0.067233	0.19747	0.896651	133	4	0.20091
FBgn0024326	10	0.28559	0.5226	0.98102	334	2	0.38011	0.067341	0.19763	0.896651	134	5	0.38011
FBgn0034029	10	0.004944	0.024664	0.893369	18	4	-0.29994	0.06747	0.19803	0.896651	135	2	-0.29994
FBgn0034700	10	0.27384	0.51276	0.98102	331	1	-0.032538	0.067622	0.19844	0.896651	136	4	-0.032538
FBgn0265268	10	0.01565	0.062463	0.98102	37	2	-0.31634	0.068338	0.19991	0.896651	137	2	-0.31634
FBgn0034187	10	0.70012	0.82404	0.990865	541	2	-0.57464	0.068806	0.20072	0.896651	138	3	-0.57464
FBgn0260398	10	0.17009	0.37398	0.98102	235	2	0.26845	0.069118	0.20137	0.896651	139	5	0.26845
FBgn0260646	10	0.065098	0.19267	0.98102	115	3	-0.059091	0.069429	0.20202	0.896651	140	3	-0.059091
FBgn0259166	9	0.85092	0.88127	0.990865	580	1	-0.97179	0.069532	0.1972	0.896651	141	3	-0.97179
FBgn0036346	10	0.16001	0.35926	0.98102	225	4	-0.27321	0.070086	0.20357	0.896651	142	4	-0.27321
FBgn0025626	10	0.64702	0.79436	0.984068	522	1	-0.11724	0.071282	0.20619	0.896651	143	4	-0.11724
FBgn0083141	10	0.61785	0.77859	0.984068	511	2	0.15152	0.071447	0.20647	0.896651	144	5	0.15152
FBgn0020224	9	0.35234	0.56376	0.98102	368	2	0.20978	0.072306	0.2022	0.896651	145	4	0.20978
FBgn0029522	10	0.61785	0.77859	0.984068	510	2	-0.057932	0.073974	0.21186	0.896651	146	4	-0.057932
FBgn0040297	10	0.85859	0.90347	0.994663	584	1	-0.022219	0.073974	0.21186	0.896651	147	2	-0.022219
FBgn0027356	8	0.57254	0.71448	0.98102	495	2	-0.16022	0.07424	0.19511	0.896651	148	3	-0.16022
FBgn0038715	10	0.1302	0.31544	0.98102	200	3	-0.97179	0.075421	0.21509	0.896651	149	3	-0.97179
FBgn0037538	10	0.88531	0.91341	0.994663	594	1	0.053537	0.075708	0.2158	0.896651	150	5	0.053537
FBgn0036659	10	0.016372	0.064778	0.98102	38	3	0.19819	0.076777	0.2181	0.896651	151	5	0.19819
FBgn0010015	10	0.081313	0.22837	0.98102	141	2	0.12352	0.077346	0.21929	0.896651	152	5	0.12352
FBgn0031195	10	0.69161	0.8188	0.986793	540	2	-0.16017	0.077392	0.21939	0.896651	153	4	-0.16017
FBgn0030293	10	0.023971	0.090436	0.98102	51	5	-0.47179	0.078005	0.22106	0.896651	154	3	-0.47179
FBgn0036876	10	0.99272	0.99314	0.994663	641	0	0.1349	0.079006	0.22319	0.896651	155	5	0.1349
FBgn0039277	10	0.050134	0.15716	0.98102	99	3	-0.38628	0.079564	0.22427	0.896651	156	5	-0.38628
FBgn0032187	10	0.99272	0.99314	0.994663	647	0	0.12835	0.079751	0.22475	0.896651	157	5	0.12835
FBgn0010340	10	0.11237	0.2885	0.98102	177	2	-0.1494	0.080371	0.22611	0.896651	158	4	-0.1494
FBgn0086384	9	0.054737	0.16468	0.98102	104	3	-0.46478	0.081423	0.21839	0.896651	159	3	-0.46478
FBgn0267698	10	0.99272	0.99314	0.994663	638	0	0.11751	0.082505	0.23083	0.896651	160	4	0.11751
FBgn0036908	10	0.75553	0.85761	0.990865	555	2	0.049163	0.082775	0.23133	0.896651	161	4	0.049163
FBgn0032664	10	0.071024	0.20558	0.98102	122	3	-0.25976	0.082946	0.23177	0.896651	162	3	-0.25976
FBgn0037714	10	0.99272	0.99314	0.994663	651	0	0.11284	0.086492	0.23917	0.896651	163	3	0.11284
FBgn0034202	10	0.52353	0.72899	0.98102	470	2	0.28419	0.086847	0.23992	0.896651	164	5	0.28419
FBgn0053098	10	0.92089	0.93056	0.994663	602	1	0.30002	0.086847	0.23992	0.896651	165	5	0.30002
FBgn0266696	10	0.14402	0.33561	0.98102	213	3	0.37886	0.086847	0.23992	0.896651	166	5	0.37886
FBgn0034730	10	0.46971	0.68108	0.98102	439	3	0.093553	0.086974	0.2401	0.896651	167	4	0.093553
FBgn0046692	10	0.76431	0.86339	0.990865	559	2	0.015516	0.087147	0.24052	0.896651	168	4	0.015516
FBgn0035887	10	0.75159	0.85547	0.990865	553	2	0.16611	0.087912	0.24201	0.896651	169	5	0.16611
FBgn0033706	9	0.10024	0.25194	0.98102	167	2	-0.73925	0.087989	0.22992	0.896651	170	2	-0.73925
FBgn0037679	10	0.4182	0.63732	0.98102	403	2	0.025101	0.089568	0.24582	0.896651	171	4	0.025101
FBgn0016081	10	0.95455	0.95505	0.994663	617	1	0.1359	0.090334	0.24742	0.896651	172	5	0.1359
FBgn0036044	10	0.46574	0.67783	0.98102	436	3	0.009213	0.090477	0.24772	0.896651	173	4	0.009213
FBgn0037492	10	0.32204	0.55453	0.98102	351	2	-0.019524	0.090785	0.24849	0.896651	174	3	-0.019524
FBgn0015277	10	0.37515	0.60004	0.98102	379	2	-0.67987	0.091401	0.24987	0.896651	175	3	-0.67987
FBgn0063495	10	0.99272	0.99314	0.994663	632	0	-0.36793	0.091714	0.25052	0.896651	176	4	-0.36793
FBgn0037688	10	0.11884	0.29797	0.98102	191	3	-0.10314	0.091714	0.25052	0.896651	177	4	-0.10314
FBgn0044047	10	0.069546	0.20241	0.98102	121	3	-0.0013172	0.091714	0.25052	0.896651	178	4	-0.0013172
FBgn0030686	10	0.20605	0.42362	0.98102	272	1	0.18005	0.092467	0.25216	0.896651	179	5	0.18005
FBgn0044826	10	0.78736	0.87867	0.990865	568	2	-0.16511	0.09294	0.25304	0.896651	180	2	-0.16511
FBgn0050156	10	0.24503	0.47695	0.98102	313	4	-0.19931	0.09294	0.25304	0.896651	181	2	-0.19931
FBgn0034858	10	0.23009	0.45676	0.98102	298	2	-0.3678	0.09294	0.25304	0.896651	182	4	-0.3678
FBgn0003719	10	0.032327	0.11411	0.98102	69	5	-0.45072	0.094391	0.25609	0.901509	183	3	-0.45072
FBgn0038247	10	0.77117	0.86809	0.990865	563	2	0.11505	0.094941	0.25718	0.901509	184	5	0.11505
FBgn0042710	10	0.64918	0.79542	0.984068	525	2	0.12071	0.098408	0.26431	0.920205	185	5	0.12071
FBgn0283472	10	0.5072	0.71456	0.98102	458	3	-0.0026179	0.099195	0.26609	0.920205	186	4	-0.0026179
FBgn0030789	8	0.59712	0.733	0.98102	505	1	-0.28879	0.10056	0.24593	0.896651	187	3	-0.28879
FBgn0033500	10	0.41578	0.63542	0.98102	402	2	0.11307	0.1013	0.27066	0.920205	188	5	0.11307
FBgn0041184	10	0.080892	0.22731	0.98102	138	3	-0.15868	0.10152	0.27113	0.920205	189	4	-0.15868
FBgn0030460	2	0.43649	0.43625	0.98102	418	1	0.88222	0.10177	0.14989	0.896651	190	1	0.88222
FBgn0030359	10	0.95777	0.95838	0.994663	622	0	-0.64031	0.10251	0.27318	0.920205	191	3	-0.64031
FBgn0041164	10	0.66366	0.80302	0.984068	528	1	0.15089	0.10301	0.27409	0.920205	192	4	0.15089
FBgn0263235	10	0.52158	0.72733	0.98102	467	3	-0.23286	0.10302	0.27409	0.920205	193	1	-0.23286
FBgn0023169	10	0.42839	0.6459	0.98102	411	3	-0.33273	0.10745	0.281	0.920205	194	3	-0.33273
FBgn0039623	10	0.073974	0.21193	0.98102	125	3	-0.31391	0.10779	0.28151	0.920205	195	3	-0.31391
FBgn0036970	10	0.75425	0.85692	0.990865	554	1	-0.021831	0.10944	0.28386	0.920205	196	4	-0.021831
FBgn0023512	10	0.016615	0.065619	0.98102	39	5	-0.26767	0.11058	0.28564	0.920205	197	3	-0.26767
FBgn0026317	10	0.58029	0.75985	0.981371	497	2	-0.12575	0.11121	0.28649	0.920205	198	4	-0.12575
FBgn0003091	10	0.44988	0.66417	0.98102	424	1	0.20855	0.11157	0.28691	0.920205	199	4	0.20855
FBgn0039782	10	0.3459	0.57513	0.98102	366	3	-0.26666	0.11198	0.28754	0.920205	200	4	-0.26666
FBgn0042712	10	0.26689	0.50492	0.98102	330	4	-0.25154	0.11212	0.28785	0.920205	201	2	-0.25154
FBgn0050293	10	0.27738	0.51574	0.98102	332	3	-0.1806	0.11299	0.28919	0.920205	202	4	-0.1806
FBgn0004108	10	0.91439	0.92685	0.994663	598	1	-0.017963	0.11308	0.28933	0.920205	203	4	-0.017963
FBgn0038438	9	0.76983	0.85312	0.990865	561	1	-0.97179	0.1132	0.2721	0.920205	204	3	-0.97179
FBgn0037606	10	0.6287	0.78423	0.984068	514	2	-0.13884	0.1147	0.29161	0.922972	205	4	-0.13884
FBgn0023023	10	0.04726	0.15091	0.98102	90	5	-0.49436	0.12005	0.2995	0.94084	206	3	-0.49436
FBgn0031183	10	0.063611	0.18917	0.98102	113	3	0.0095787	0.12073	0.30045	0.94084	207	4	0.0095787
FBgn0032519	10	0.11299	0.28949	0.98102	179	4	-0.5852	0.12145	0.30159	0.94084	208	4	-0.5852
FBgn0033685	10	0.31482	0.54825	0.98102	347	3	-0.066251	0.12496	0.30725	0.948372	209	1	-0.066251
FBgn0024222	10	0.22155	0.44502	0.98102	288	3	-0.0069208	0.12607	0.30886	0.948372	210	4	-0.0069208
FBgn0034715	10	0.59517	0.76736	0.981371	503	2	-0.47719	0.1262	0.30902	0.948372	211	3	-0.47719
FBgn0039747	10	0.059821	0.18039	0.98102	107	5	-0.20861	0.12673	0.30982	0.948372	212	3	-0.20861
FBgn0030620	10	0.08104	0.22762	0.98102	139	4	-0.35912	0.1298	0.31464	0.958622	213	4	-0.35912
FBgn0015039	10	0.22287	0.44686	0.98102	290	4	-0.17623	0.13263	0.31915	0.959985	214	1	-0.17623
FBgn0250823	10	0.40002	0.62215	0.98102	393	2	-0.12576	0.13421	0.32146	0.959985	215	3	-0.12576
FBgn0035709	10	0.25225	0.48641	0.98102	319	1	0.12999	0.13445	0.3218	0.959985	216	4	0.12999
FBgn0037855	10	0.014895	0.059831	0.98102	34	4	0.0027124	0.13584	0.32392	0.959985	217	3	0.0027124
FBgn0034650	10	0.092467	0.25218	0.98102	156	5	-0.011208	0.13584	0.32392	0.959985	218	3	-0.011208
FBgn0033980	10	0.29897	0.53456	0.98102	339	3	-0.76969	0.13855	0.32774	0.961044	219	2	-0.76969
FBgn0034317	10	0.1144	0.29151	0.98102	181	3	-0.29206	0.13863	0.3279	0.961044	220	3	-0.29206
FBgn0086442	10	0.20661	0.42431	0.98102	273	4	-0.34315	0.13919	0.3287	0.961044	221	4	-0.34315
FBgn0085447	10	0.2178	0.44006	0.98102	283	4	-0.1324	0.14155	0.33198	0.962477	222	2	-0.1324
FBgn0028978	10	0.26381	0.50092	0.98102	328	3	-0.127	0.14367	0.33495	0.962477	223	3	-0.127
FBgn0263782	8	0.49877	0.66285	0.98102	454	2	-0.15377	0.14407	0.32256	0.959985	224	2	-0.15377
FBgn0029114	10	0.99272	0.99314	0.994663	637	0	0.1236	0.14457	0.33625	0.962477	225	4	0.1236
FBgn0025549	10	0.2027	0.41883	0.98102	268	4	-0.63407	0.14505	0.33691	0.962477	226	2	-0.63407
FBgn0014135	10	0.4342	0.651	0.98102	415	3	-0.089901	0.14642	0.33894	0.962477	227	3	-0.089901
FBgn0030674	5	0.9147	0.915	0.994663	601	0	0.092057	0.14715	0.27691	0.920205	228	1	0.092057
FBgn0030449	10	0.67018	0.80654	0.984068	533	2	-0.27254	0.14732	0.34033	0.962477	229	2	-0.27254
FBgn0030855	10	0.027191	0.10055	0.98102	58	4	-0.11029	0.14732	0.34033	0.962477	230	4	-0.11029
FBgn0036271	10	0.50254	0.71038	0.98102	455	3	-0.20649	0.14778	0.341	0.962477	231	3	-0.20649
FBgn0004638	10	0.86768	0.90641	0.994663	590	1	-0.72733	0.15188	0.34728	0.968662	232	2	-0.72733
FBgn0262081	10	0.36026	0.58727	0.98102	371	2	-0.58205	0.15231	0.34785	0.968662	233	3	-0.58205
FBgn0030710	10	0.23048	0.45736	0.98102	299	2	-0.16117	0.15283	0.34864	0.968662	234	4	-0.16117
FBgn0035101	10	0.46336	0.67562	0.98102	433	3	-0.19401	0.15324	0.34913	0.968662	235	2	-0.19401
FBgn0002940	10	0.73987	0.84789	0.990865	550	2	-0.62989	0.15632	0.35356	0.968971	236	3	-0.62989
FBgn0040068	10	0.16405	0.36542	0.98102	228	1	-0.97179	0.15655	0.35386	0.968971	237	4	-0.97179
FBgn0034173	10	0.095834	0.25911	0.98102	161	2	0.11449	0.15827	0.35626	0.968971	238	4	0.11449
FBgn0010379	10	0.797	0.88556	0.990865	573	2	-0.18938	0.15866	0.35699	0.968971	239	3	-0.18938
FBgn0010549	10	0.3691	0.5947	0.98102	374	2	0.1383	0.15957	0.35841	0.968971	240	4	0.1383
FBgn0037039	10	0.14367	0.33518	0.98102	212	2	-0.59224	0.16129	0.361	0.968971	241	4	-0.59224
FBgn0039777	9	0.31094	0.52343	0.98102	346	3	-0.19599	0.16147	0.35116	0.968971	242	2	-0.19599
FBgn0052425	10	0.45177	0.66589	0.98102	427	2	-0.39916	0.1618	0.36178	0.968971	243	4	-0.39916
FBgn0040377	10	0.99272	0.99314	0.994663	644	0	-0.011378	0.16239	0.36262	0.968971	244	4	-0.011378
FBgn0023197	10	0.13416	0.32167	0.98102	203	4	-0.3535	0.1644	0.36581	0.971328	245	4	-0.3535
FBgn0029840	10	0.43655	0.65296	0.98102	419	2	-0.16478	0.16656	0.36887	0.971328	246	3	-0.16478
FBgn0027779	10	0.66866	0.80574	0.984068	531	2	-0.33413	0.16673	0.36907	0.971328	247	2	-0.33413
FBgn0010501	10	0.2437	0.47516	0.98102	310	2	0.13735	0.16816	0.37102	0.971328	248	4	0.13735
FBgn0003984	10	0.63552	0.7882	0.984068	516	2	0.17305	0.16893	0.37212	0.971328	249	4	0.17305
FBgn0030716	10	0.68102	0.81259	0.984068	535	2	-0.696	0.16936	0.37271	0.971328	250	3	-0.696
FBgn0024754	10	0.45047	0.66469	0.98102	425	3	-0.29774	0.17016	0.37393	0.971328	251	3	-0.29774
FBgn0000326	10	0.13124	0.31703	0.98102	202	3	-0.25806	0.17258	0.37732	0.976229	252	3	-0.25806
FBgn0260648	10	0.61149	0.77514	0.984068	508	1	-0.12159	0.17504	0.38044	0.980428	253	4	-0.12159
FBgn0031653	10	0.18135	0.38928	0.98102	249	3	-0.39638	0.17672	0.38269	0.982334	254	3	-0.39638
FBgn0001281	10	0.99272	0.99314	0.994663	643	0	0.12411	0.18016	0.38753	0.98716	255	4	0.12411
FBgn0030332	10	0.11798	0.29664	0.98102	188	4	0.0039509	0.18124	0.389	0.98716	256	4	0.0039509
FBgn0036038	10	0.87356	0.90867	0.994663	592	1	0.036846	0.18131	0.38911	0.98716	257	2	0.036846
FBgn0270924	10	0.50756	0.71489	0.98102	459	2	-0.37363	0.18463	0.394	0.98762	258	4	-0.37363
FBgn0051902	10	0.54405	0.74195	0.981241	485	2	-0.3943	0.18529	0.39482	0.98762	259	1	-0.3943
FBgn0031610	10	0.52987	0.73457	0.98102	476	3	-0.16642	0.18771	0.39827	0.98762	260	2	-0.16642
FBgn0032763	10	0.048626	0.1537	0.98102	94	4	-0.10587	0.18942	0.40084	0.98762	261	4	-0.10587
FBgn0037248	10	0.88282	0.91243	0.994663	593	1	-0.97179	0.18988	0.40141	0.98762	262	1	-0.97179
FBgn0025807	10	0.29774	0.53346	0.98102	337	2	-0.83911	0.19151	0.40351	0.988631	263	2	-0.83911
FBgn0037074	10	0.5915	0.76549	0.981371	502	1	-0.067461	0.19248	0.40485	0.988631	264	2	-0.067461
FBgn0010269	10	0.45382	0.66756	0.98102	430	3	-0.016453	0.19444	0.40729	0.990864	265	3	-0.016453
FBgn0050438	10	0.57493	0.75717	0.981371	496	2	-0.80098	0.19573	0.40902	0.991378	266	3	-0.80098
FBgn0000038	10	0.11728	0.29547	0.98102	186	4	-0.21917	0.20091	0.41617	0.992874	267	2	-0.21917
FBgn0030018	8	0.49008	0.65658	0.98102	450	2	-0.03546	0.20378	0.39208	0.98762	268	3	-0.03546
FBgn0003892	10	0.022974	0.087131	0.98102	50	5	-0.49761	0.20506	0.42213	0.992874	269	3	-0.49761
FBgn0050268	10	0.20038	0.41565	0.98102	264	4	-0.70851	0.20605	0.42352	0.992874	270	1	-0.70851
FBgn0038979	10	0.38544	0.60946	0.98102	384	3	0.014936	0.21019	0.42963	0.992874	271	4	0.014936
FBgn0017572	10	0.51194	0.7184	0.98102	462	1	0.086274	0.21091	0.43055	0.992874	272	4	0.086274
FBgn0000560	10	0.34206	0.5718	0.98102	362	3	-0.68214	0.21117	0.4309	0.992874	273	3	-0.68214
FBgn0029858	10	0.14537	0.33762	0.98102	215	4	-0.56307	0.21244	0.43273	0.992874	274	2	-0.56307
FBgn0283499	10	0.48653	0.69597	0.98102	448	2	-0.24273	0.21372	0.4344	0.992874	275	3	-0.24273
FBgn0029067	10	0.17353	0.37867	0.98102	243	2	0.040692	0.21487	0.43602	0.992874	276	2	0.040692
FBgn0021856	10	0.39394	0.61683	0.98102	390	3	-0.39443	0.21652	0.43816	0.992874	277	3	-0.39443
FBgn0033860	10	0.64391	0.79259	0.984068	521	1	0.0029185	0.2178	0.43998	0.992874	278	4	0.0029185
FBgn0262103	10	0.99272	0.99314	0.994663	642	0	-0.03955	0.21786	0.44008	0.992874	279	2	-0.03955
FBgn0027083	10	0.33089	0.56195	0.98102	354	1	0.14143	0.22036	0.44318	0.992874	280	4	0.14143
FBgn0033246	10	0.99272	0.99314	0.994663	649	0	-0.28917	0.22194	0.4455	0.992874	281	2	-0.28917
FBgn0263076	10	0.10003	0.26783	0.98102	166	4	-0.41259	0.22309	0.44715	0.992874	282	3	-0.41259
FBgn0264340	10	0.19573	0.40915	0.98102	263	1	0.10853	0.22403	0.44846	0.992874	283	4	0.10853
FBgn0039015	10	0.71606	0.83355	0.990865	546	2	-0.20927	0.22476	0.44934	0.992874	284	2	-0.20927
FBgn0004861	10	0.33309	0.56394	0.98102	356	3	0.25923	0.22477	0.44938	0.992874	285	4	0.25923
FBgn0036428	10	0.58258	0.76126	0.981371	499	2	-0.75552	0.22551	0.45028	0.992874	286	4	-0.75552
FBgn0020660	8	0.16779	0.3505	0.98102	232	3	-0.47127	0.22566	0.41671	0.992874	287	2	-0.47127
FBgn0038331	10	0.32053	0.55314	0.98102	350	3	-0.85307	0.22884	0.45505	0.992874	288	2	-0.85307
FBgn0000229	10	0.3767	0.60161	0.98102	380	2	-0.043278	0.23037	0.45712	0.992874	289	3	-0.043278
FBgn0031765	10	0.51475	0.72113	0.98102	466	2	-0.59485	0.23133	0.4584	0.992874	290	4	-0.59485
FBgn0031869	10	0.25148	0.48543	0.98102	318	3	-0.054465	0.23183	0.45901	0.992874	291	4	-0.054465
FBgn0035046	10	0.010845	0.046443	0.98102	29	4	-0.44242	0.23349	0.46124	0.992874	292	2	-0.44242
FBgn0053121	9	0.37091	0.58195	0.98102	376	3	-0.47122	0.23525	0.44693	0.992874	293	2	-0.47122
FBgn0030507	10	0.091093	0.24925	0.98102	155	3	-0.17062	0.23705	0.46591	0.992874	294	3	-0.17062
FBgn0032304	10	0.0015278	0.0084356	0.6319	8	4	-0.39013	0.23783	0.46688	0.992874	295	4	-0.39013
FBgn0034789	10	0.17305	0.37798	0.98102	240	4	-0.51779	0.23939	0.46917	0.992874	296	2	-0.51779
FBgn0038515	10	0.20164	0.41743	0.98102	267	4	-0.2158	0.24123	0.47172	0.992874	297	4	-0.2158
FBgn0266111	10	0.10302	0.27438	0.98102	171	2	-0.65383	0.24123	0.47172	0.992874	298	4	-0.65383
FBgn0039305	10	0.16539	0.36731	0.98102	230	2	0.091962	0.24154	0.47218	0.992874	299	3	0.091962
FBgn0035627	10	0.20348	0.4201	0.98102	270	2	-0.58828	0.24227	0.47305	0.992874	300	3	-0.58828
FBgn0028988	10	0.098071	0.26366	0.98102	163	4	-0.34865	0.24503	0.47689	0.992874	301	4	-0.34865
FBgn0264075	9	0.16967	0.36387	0.98102	234	2	-0.97179	0.24546	0.45728	0.992874	302	3	-0.97179
FBgn0003483	10	0.66289	0.8026	0.984068	527	2	-0.37651	0.2474	0.48018	0.992874	303	3	-0.37651
FBgn0039421	10	0.95566	0.95619	0.994663	619	1	0.077877	0.2479	0.48087	0.992874	304	4	0.077877
FBgn0014427	10	0.015618	0.062354	0.98102	36	3	0.10684	0.25239	0.48651	0.992874	305	3	0.10684
FBgn0069056	10	0.47692	0.68743	0.98102	443	2	0.064043	0.25444	0.48922	0.992874	306	3	0.064043
FBgn0037625	10	0.0069737	0.032679	0.895833	22	4	-0.33552	0.25951	0.49558	0.992874	307	2	-0.33552
FBgn0015300	10	0.12005	0.29978	0.98102	192	3	-0.61392	0.26243	0.49906	0.992874	308	3	-0.61392
FBgn0052383	10	0.52178	0.7275	0.98102	469	2	-0.97179	0.26335	0.50023	0.992874	309	3	-0.97179
FBgn0021796	10	0.46445	0.67653	0.98102	435	1	0.11315	0.26376	0.50082	0.992874	310	4	0.11315
FBgn0015008	10	0.99272	0.99314	0.994663	628	0	0.058484	0.26454	0.50181	0.992874	311	4	0.058484
FBgn0038870	10	0.17016	0.37408	0.98102	236	3	0.014426	0.26552	0.50312	0.992874	312	4	0.014426
FBgn0030761	10	0.047909	0.15232	0.98102	91	4	-0.072225	0.26757	0.50569	0.992874	313	3	-0.072225
FBgn0024992	10	0.58941	0.76433	0.981371	500	2	-0.23171	0.2679	0.50616	0.992874	314	2	-0.23171
FBgn0039532	10	0.76639	0.86503	0.990865	560	2	0.13643	0.26866	0.50709	0.992874	315	4	0.13643
FBgn0004118	10	0.45286	0.66678	0.98102	429	3	-0.23526	0.27028	0.50918	0.992874	316	2	-0.23526
FBgn0036489	4	0.86044	0.86164	0.990865	587	0	0.37733	0.27396	0.39801	0.98762	317	2	0.37733
FBgn0038197	4	0.21295	0.32626	0.98102	279	2	-0.1983	0.27556	0.40016	0.98762	318	1	-0.1983
FBgn0039734	10	0.00058142	0.0037255	0.404839	6	6	-0.71317	0.27856	0.51609	0.992874	319	2	-0.71317
FBgn0037828	10	0.23591	0.4645	0.98102	303	2	-0.22222	0.27973	0.51703	0.992874	320	2	-0.22222
FBgn0264078	10	0.30227	0.53733	0.98102	340	3	-0.07376	0.28045	0.51772	0.992874	321	3	-0.07376
FBgn0025469	10	0.1262	0.30929	0.98102	198	2	-0.25201	0.28466	0.52119	0.992874	322	3	-0.25201
FBgn0030384	10	0.11157	0.28721	0.98102	175	3	-0.60388	0.28792	0.52424	0.992874	323	3	-0.60388
FBgn0024332	8	0.47211	0.64478	0.98102	441	2	-0.97179	0.28814	0.48725	0.992874	324	1	-0.97179
FBgn0000289	10	0.12147	0.3019	0.98102	194	3	-0.97179	0.29151	0.52736	0.992874	325	2	-0.97179
FBgn0026090	10	0.1178	0.29622	0.98102	187	2	-0.29837	0.29371	0.52948	0.992874	326	3	-0.29837
FBgn0030538	8	0.074958	0.19669	0.98102	128	4	-0.41696	0.29464	0.49443	0.992874	327	2	-0.41696
FBgn0001250	10	0.21926	0.44208	0.98102	285	4	-0.26814	0.30156	0.53621	0.992874	328	3	-0.26814
FBgn0000273	10	0.23708	0.466	0.98102	304	4	-0.080522	0.30203	0.53664	0.992874	329	3	-0.080522
FBgn0053506	10	0.46337	0.67564	0.98102	434	2	-0.34112	0.3046	0.53893	0.992874	330	2	-0.34112
FBgn0039049	10	0.55636	0.74764	0.981371	489	2	-0.65919	0.30487	0.53909	0.992874	331	3	-0.65919
FBgn0030850	10	0.40766	0.62861	0.98102	397	3	-0.73339	0.3063	0.54024	0.992874	332	1	-0.73339
FBgn0260768	10	0.078579	0.22243	0.98102	134	4	-0.8342	0.30996	0.54352	0.992874	333	2	-0.8342
FBgn0000274	10	0.25462	0.48949	0.98102	320	4	-0.58962	0.3118	0.54496	0.992874	334	3	-0.58962
FBgn0005592	10	0.93987	0.94285	0.994663	610	1	-0.12852	0.3134	0.54647	0.992874	335	3	-0.12852
FBgn0014366	10	0.34505	0.57437	0.98102	363	2	0.094108	0.3159	0.54862	0.992874	336	3	0.094108
FBgn0063667	10	0.2486	0.48177	0.98102	314	2	-0.1693	0.3159	0.54862	0.992874	337	2	-0.1693
FBgn0031194	10	0.091013	0.24907	0.98102	154	2	-0.94746	0.3159	0.54862	0.992874	338	1	-0.94746
FBgn0033128	10	0.2004	0.41568	0.98102	266	4	-0.15281	0.31625	0.54902	0.992874	339	3	-0.15281
FBgn0029870	10	0.15051	0.34518	0.98102	217	2	-0.17871	0.31734	0.55	0.992874	340	2	-0.17871
FBgn0038448	10	0.018006	0.070468	0.98102	42	5	-0.3014	0.31791	0.55063	0.992874	341	3	-0.3014
FBgn0038876	10	0.010049	0.043761	0.98102	27	6	-0.47753	0.31857	0.55108	0.992874	342	2	-0.47753
FBgn0259977	10	0.1152	0.29263	0.98102	182	4	-0.5625	0.31857	0.55108	0.992874	343	3	-0.5625
FBgn0027342	10	0.50778	0.71509	0.98102	460	2	0.15372	0.32196	0.554	0.992874	344	3	0.15372
FBgn0033115	10	0.047115	0.15063	0.98102	89	4	-0.2863	0.32316	0.55497	0.992874	345	2	-0.2863
FBgn0042693	10	0.21244	0.43281	0.98102	278	2	-0.18031	0.32533	0.55706	0.992874	346	2	-0.18031
FBgn0033491	10	0.17654	0.38261	0.98102	246	4	-0.79265	0.32673	0.55812	0.992874	347	3	-0.79265
FBgn0262739	7	0.024599	0.080541	0.98102	54	3	-0.42353	0.32783	0.51411	0.992874	348	1	-0.42353
FBgn0039209	10	0.17989	0.38732	0.98102	248	4	-0.19419	0.32979	0.56063	0.992874	349	2	-0.19419
FBgn0040370	10	0.49583	0.70392	0.98102	453	2	0.11829	0.33086	0.56152	0.992874	350	3	0.11829
FBgn0034381	10	0.0045828	0.022952	0.880266	17	6	-0.70743	0.33199	0.56244	0.992874	351	2	-0.70743
FBgn0014141	10	0.0089448	0.039823	0.98102	26	3	-0.52029	0.33199	0.56244	0.992874	352	3	-0.52029
FBgn0010316	7	0.96813	0.96849	0.994663	625	0	0.0041219	0.33538	0.5197	0.992874	353	2	0.0041219
FBgn0003890	8	0.21365	0.40358	0.98102	280	2	-0.27502	0.33953	0.54434	0.992874	354	3	-0.27502
FBgn0015582	9	0.503	0.68954	0.98102	456	1	-0.14747	0.33989	0.55177	0.992874	355	2	-0.14747
FBgn0031126	10	0.6671	0.80488	0.984068	530	2	-0.0623	0.34072	0.57031	0.992874	356	2	-0.0623
FBgn0031972	10	0.9427	0.94531	0.994663	612	1	-0.13247	0.34397	0.57293	0.992874	357	1	-0.13247
FBgn0259189	10	0.066176	0.19512	0.98102	117	4	-0.50047	0.34686	0.57551	0.992874	358	3	-0.50047
FBgn0016984	10	0.77168	0.86842	0.990865	564	2	0.027831	0.34773	0.57642	0.992874	359	3	0.027831
FBgn0039188	10	0.002204	0.01183	0.687903	11	3	-0.63456	0.34773	0.57642	0.992874	360	2	-0.63456
FBgn0030956	10	0.28653	0.52344	0.98102	335	3	-0.97179	0.35042	0.5788	0.992874	361	1	-0.97179
FBgn0267033	8	0.036238	0.11583	0.98102	72	3	-0.13379	0.35144	0.55735	0.992874	362	2	-0.13379
FBgn0266347	9	0.13699	0.3116	0.98102	206	3	-0.43672	0.35282	0.56409	0.992874	363	1	-0.43672
FBgn0050424	5	0.22348	0.35721	0.98102	291	1	0.17826	0.35345	0.49498	0.992874	364	2	0.17826
FBgn0017561	10	0.3327	0.56356	0.98102	355	2	-0.93271	0.35363	0.58146	0.992874	365	3	-0.93271
FBgn0019940	10	0.088388	0.24318	0.98102	150	4	-0.27208	0.35469	0.58237	0.992874	366	1	-0.27208
FBgn0265137	10	0.15735	0.35502	0.98102	222	3	-0.97179	0.35504	0.58262	0.992874	367	3	-0.97179
FBgn0031187	10	0.49513	0.70321	0.98102	452	1	-0.10223	0.35788	0.58492	0.992874	368	1	-0.10223
FBgn0038705	10	0.34518	0.57453	0.98102	365	3	-0.4233	0.35937	0.58621	0.992874	369	3	-0.4233
FBgn0024542	10	0.49411	0.70244	0.98102	451	3	-0.28772	0.36368	0.58982	0.992874	370	1	-0.28772
FBgn0022800	10	0.10804	0.28215	0.98102	172	2	-0.64031	0.36735	0.5931	0.992874	371	2	-0.64031
FBgn0039650	10	0.3097	0.54375	0.98102	344	3	-0.16249	0.36944	0.59463	0.992874	372	3	-0.16249
FBgn0032871	10	0.22506	0.44984	0.98102	294	2	-0.060906	0.3695	0.5947	0.992874	373	3	-0.060906
FBgn0034142	6	0.54467	0.66627	0.98102	486	1	-0.73963	0.37031	0.51997	0.992874	374	1	-0.73963
FBgn0025115	10	0.31758	0.55071	0.98102	349	3	-0.59374	0.37256	0.59757	0.992874	375	3	-0.59374
FBgn0004507	10	0.22727	0.45278	0.98102	296	3	-0.24668	0.37457	0.59926	0.992874	376	3	-0.24668
FBgn0024996	10	0.11582	0.29349	0.98102	184	4	-0.34835	0.37843	0.60264	0.992874	377	3	-0.34835
FBgn0004463	10	0.066583	0.19609	0.98102	118	4	-0.78921	0.37876	0.60292	0.992874	378	2	-0.78921
FBgn0283649	10	0.045603	0.14708	0.98102	85	4	-0.74177	0.37978	0.60389	0.992874	379	2	-0.74177
FBgn0029131	7	0.026881	0.085954	0.98102	57	4	-0.27595	0.37987	0.55333	0.992874	380	1	-0.27595
FBgn0035336	10	0.075872	0.21628	0.98102	130	3	-0.37388	0.38155	0.60543	0.992874	381	2	-0.37388
FBgn0037327	9	0.85632	0.8841	0.990865	582	1	0.040678	0.38174	0.59274	0.992874	382	3	0.040678
FBgn0038952	10	0.0037878	0.01935	0.841075	15	5	-0.6862	0.38183	0.6057	0.992874	383	2	-0.6862
FBgn0032235	10	0.048093	0.15261	0.98102	92	4	-0.84069	0.38795	0.61154	0.992874	384	1	-0.84069
FBgn0036323	8	0.66869	0.78858	0.984068	532	2	-0.27264	0.39121	0.59142	0.992874	385	2	-0.27264
FBgn0032717	10	0.38592	0.60984	0.98102	386	3	-0.28202	0.392	0.615	0.992874	386	3	-0.28202
FBgn0050428	10	0.17654	0.38261	0.98102	244	4	-0.94212	0.39334	0.61605	0.992874	387	2	-0.94212
FBgn0003256	10	0.48826	0.69738	0.98102	449	1	-0.97179	0.39902	0.62106	0.992874	388	2	-0.97179
FBgn0039938	10	0.09809	0.26368	0.98102	164	5	-0.6812	0.40266	0.62403	0.992874	389	2	-0.6812
FBgn0011474	10	0.26005	0.49618	0.98102	323	4	-0.57564	0.40597	0.62701	0.992874	390	3	-0.57564
FBgn0024846	10	0.18266	0.39115	0.98102	250	3	-0.39384	0.40597	0.62701	0.992874	391	2	-0.39384
FBgn0034936	10	0.12046	0.30033	0.98102	193	4	-0.23582	0.40696	0.62774	0.992874	392	3	-0.23582
FBgn0030844	10	0.18702	0.39759	0.98102	253	4	-0.33003	0.40814	0.62886	0.992874	393	3	-0.33003
FBgn0051624	7	0.056997	0.15423	0.98102	105	4	-0.97179	0.40827	0.5741	0.992874	394	1	-0.97179
FBgn0039270	10	0.11864	0.29764	0.98102	190	2	0.027728	0.41007	0.63049	0.992874	395	3	0.027728
FBgn0051826	10	0.41909	0.638	0.98102	404	2	-0.60449	0.41433	0.63396	0.992874	396	2	-0.60449
FBgn0028538	10	0.94844	0.94972	0.994663	615	1	-0.25222	0.41529	0.63479	0.992874	397	1	-0.25222
FBgn0265784	10	0.23133	0.45847	0.98102	300	4	-0.27722	0.41909	0.63775	0.992874	398	2	-0.27722
FBgn0038279	10	0.15129	0.34653	0.98102	219	4	-0.31359	0.41999	0.6385	0.992874	399	2	-0.31359
FBgn0036018	10	0.19121	0.40335	0.98102	257	3	-0.73181	0.42207	0.64026	0.992874	400	2	-0.73181
FBgn0036206	10	0.06747	0.1981	0.98102	119	2	-0.77709	0.42255	0.64069	0.992874	401	2	-0.77709
FBgn0034491	10	0.39243	0.61561	0.98102	389	3	-0.29599	0.43021	0.6472	0.992874	402	2	-0.29599
FBgn0010389	10	0.44432	0.6596	0.98102	423	3	-0.20942	0.4332	0.64989	0.992874	403	3	-0.20942
FBgn0015269	10	0.23258	0.46005	0.98102	301	3	-0.64644	0.43778	0.65378	0.992874	404	2	-0.64644
FBgn0050429	10	0.4519	0.66594	0.98102	428	3	-0.30544	0.44041	0.6561	0.992874	405	3	-0.30544
FBgn0028717	10	0.064465	0.19119	0.98102	114	3	-0.48302	0.44246	0.65776	0.992874	406	1	-0.48302
FBgn0050378	10	0.11403	0.29104	0.98102	180	4	-0.42161	0.4436	0.65877	0.992874	407	2	-0.42161
FBgn0033473	10	0.93705	0.94086	0.994663	609	1	-0.087835	0.44711	0.66175	0.992874	408	2	-0.087835
FBgn0037889	10	0.32814	0.55976	0.98102	353	2	0.015555	0.44769	0.66217	0.992874	409	3	0.015555
FBgn0029722	10	0.26312	0.50003	0.98102	327	1	-0.97179	0.45172	0.66557	0.992874	410	3	-0.97179
FBgn0033569	10	0.027451	0.10133	0.98102	60	6	-0.28771	0.45177	0.66569	0.992874	411	2	-0.28771
FBgn0016930	10	0.2606	0.49687	0.98102	324	3	-0.75266	0.45238	0.66619	0.992874	412	3	-0.75266
FBgn0035995	10	0.24227	0.47311	0.98102	307	2	-0.18487	0.4541	0.66758	0.992874	413	2	-0.18487
FBgn0052105	10	0.70928	0.82917	0.990865	543	2	-0.15849	0.45811	0.67109	0.992874	414	3	-0.15849
FBgn0013672	10	0.059367	0.17938	0.98102	106	4	-0.79015	0.45817	0.6711	0.992874	415	2	-0.79015
FBgn0026136	10	8.8235e-05	0.00072729	0.201075	2	5	-0.6679	0.45903	0.67191	0.992874	416	2	-0.6679
FBgn0026323	10	0.85222	0.90145	0.994663	581	1	-0.55405	0.45903	0.67191	0.992874	417	2	-0.55405
FBgn0033504	10	0.17305	0.37798	0.98102	241	4	-0.24278	0.45931	0.67224	0.992874	418	3	-0.24278
FBgn0037536	10	0.53193	0.73629	0.98102	479	3	-0.28744	0.46145	0.6739	0.992874	419	3	-0.28744
FBgn0038541	10	0.99272	0.99314	0.994663	635	0	-0.01773	0.46383	0.67596	0.992874	420	3	-0.01773
FBgn0033113	10	0.22109	0.44432	0.98102	287	4	-0.5527	0.46395	0.67602	0.992874	421	2	-0.5527
FBgn0003140	10	0.06277	0.1872	0.98102	111	3	-0.97179	0.46535	0.67732	0.992874	422	2	-0.97179
FBgn0035508	10	0.090051	0.24682	0.98102	152	4	-0.034759	0.46626	0.67807	0.992874	423	2	-0.034759
FBgn0037579	10	0.035595	0.12223	0.98102	70	3	-0.62335	0.46712	0.67871	0.992874	424	2	-0.62335
FBgn0039941	10	0.029017	0.10562	0.98102	65	5	-0.31	0.46717	0.67877	0.992874	425	3	-0.31
FBgn0052333	10	0.52158	0.72733	0.98102	468	3	-0.5556	0.46859	0.68003	0.992874	426	3	-0.5556
FBgn0035823	10	0.079006	0.22324	0.98102	136	5	-0.27272	0.47072	0.68185	0.992874	427	2	-0.27272
FBgn0039796	10	0.4283	0.64582	0.98102	410	2	-0.077867	0.47073	0.68187	0.992874	428	3	-0.077867
FBgn0033471	10	0.412	0.63222	0.98102	399	3	-0.85781	0.47401	0.68456	0.992874	429	2	-0.85781
FBgn0028562	10	0.044088	0.14321	0.98102	84	4	-0.40726	0.47427	0.68475	0.992874	430	1	-0.40726
FBgn0031214	10	0.041052	0.13566	0.98102	81	3	-0.97179	0.47486	0.68534	0.992874	431	2	-0.97179
FBgn0004895	10	0.25877	0.49489	0.98102	322	4	-0.081293	0.47713	0.68754	0.992874	432	3	-0.081293
FBgn0015570	8	0.82549	0.85372	0.990865	578	1	-0.97179	0.47948	0.64893	0.992874	433	1	-0.97179
FBgn0050476	10	0.43032	0.6475	0.98102	412	3	-0.072145	0.48328	0.69296	0.992874	434	3	-0.072145
FBgn0036039	10	0.048793	0.15407	0.98102	95	4	-0.65189	0.48341	0.69306	0.992874	435	2	-0.65189
FBgn0050094	10	0.86405	0.90514	0.994663	589	1	-0.54333	0.48375	0.69335	0.992874	436	3	-0.54333
FBgn0259146	10	0.20594	0.42343	0.98102	271	2	-0.36345	0.48908	0.69803	0.992874	437	2	-0.36345
FBgn0025781	10	0.14505	0.33713	0.98102	214	3	-0.39395	0.48964	0.69853	0.992874	438	2	-0.39395
FBgn0034567	10	0.14073	0.33108	0.98102	208	2	0.016752	0.49598	0.70396	0.992874	439	3	0.016752
FBgn0038016	10	0.1311	0.31688	0.98102	201	4	-0.011631	0.49598	0.70396	0.992874	440	3	-0.011631
FBgn0003028	10	0.060674	0.18245	0.98102	108	3	-0.37724	0.49598	0.70396	0.992874	441	3	-0.37724
FBgn0000711	10	0.046772	0.14977	0.98102	88	4	0.048384	0.49752	0.70556	0.992874	442	2	0.048384
FBgn0032749	10	0.017356	0.068271	0.98102	41	3	-0.59923	0.50347	0.71123	0.992874	443	3	-0.59923
FBgn0036862	10	0.74191	0.84933	0.990865	551	2	-0.19577	0.50581	0.71326	0.992874	444	3	-0.19577
FBgn0051852	10	0.52924	0.73396	0.98102	475	2	-0.71172	0.50645	0.71388	0.992874	445	2	-0.71172
FBgn0267912	10	0.26239	0.49904	0.98102	326	4	-0.7723	0.50674	0.71415	0.992874	446	3	-0.7723
FBgn0030425	10	0.67324	0.80831	0.984068	534	2	-0.003742	0.50837	0.71536	0.992874	447	3	-0.003742
FBgn0029893	10	0.40794	0.62891	0.98102	398	2	-0.97179	0.50953	0.71644	0.992874	448	3	-0.97179
FBgn0003356	10	0.051303	0.16008	0.98102	100	5	-0.30605	0.51276	0.71921	0.992874	449	1	-0.30605
FBgn0039710	10	0.049441	0.1556	0.98102	97	2	-0.39837	0.51325	0.71967	0.992874	450	3	-0.39837
FBgn0015279	9	0.72475	0.82983	0.990865	548	1	-0.24151	0.51433	0.69546	0.992874	451	2	-0.24151
FBgn0038921	10	0.21936	0.44226	0.98102	286	2	0.078629	0.51557	0.72174	0.992874	452	3	0.078629
FBgn0004050	10	0.17654	0.38261	0.98102	245	4	-0.81041	0.5177	0.72374	0.992874	453	1	-0.81041
FBgn0019890	10	0.61216	0.77548	0.984068	509	2	-0.24775	0.51881	0.72477	0.992874	454	3	-0.24775
FBgn0266667	10	0.36315	0.58972	0.98102	372	3	-0.97179	0.51933	0.72533	0.992874	455	1	-0.97179
FBgn0002774	10	0.52824	0.73307	0.98102	472	2	-0.45045	0.52112	0.72683	0.992874	456	3	-0.45045
FBgn0283442	10	0.46893	0.68041	0.98102	438	1	-0.64358	0.52583	0.73106	0.992874	457	1	-0.64358
FBgn0035483	10	0.16135	0.3613	0.98102	226	4	-0.22802	0.52619	0.73135	0.992874	458	3	-0.22802
FBgn0038258	10	0.18887	0.40008	0.98102	255	2	0.072519	0.52619	0.73135	0.992874	459	3	0.072519
FBgn0036096	10	0.088862	0.24424	0.98102	151	4	-0.81072	0.5268	0.73182	0.992874	460	2	-0.81072
FBgn0263656	10	0.24866	0.48182	0.98102	315	4	-0.1917	0.52904	0.73374	0.992874	461	2	-0.1917
FBgn0029834	10	0.022921	0.086904	0.98102	49	5	-0.50584	0.53064	0.73523	0.992874	462	2	-0.50584
FBgn0035059	10	0.50511	0.71275	0.98102	457	3	-0.3927	0.53869	0.73893	0.992874	463	2	-0.3927
FBgn0039044	10	0.012181	0.050747	0.98102	31	6	-0.80052	0.54093	0.74005	0.992874	464	2	-0.80052
FBgn0263600	10	0.11723	0.29546	0.98102	185	4	-0.49762	0.54137	0.74024	0.992874	465	2	-0.49762
FBgn0033656	10	0.72611	0.83931	0.990865	549	1	-0.68621	0.54638	0.74243	0.992874	466	1	-0.68621
FBgn0029672	8	0.33795	0.54243	0.98102	359	3	-0.091152	0.54958	0.69807	0.992874	467	2	-0.091152
FBgn0035496	10	0.57205	0.75583	0.981371	494	1	-0.59475	0.55253	0.74519	0.992874	468	2	-0.59475
FBgn0262733	10	0.57107	0.75531	0.981371	493	2	-0.25661	0.55412	0.74584	0.992874	469	2	-0.25661
FBgn0038017	10	0.078929	0.22307	0.98102	135	4	-0.63623	0.5556	0.74665	0.992874	470	1	-0.63623
FBgn0029661	4	0.86044	0.86164	0.990865	586	0	0.057399	0.5583	0.58196	0.992874	471	1	0.057399
FBgn0040098	10	0.42591	0.64376	0.98102	407	1	-0.97179	0.56822	0.75329	0.992874	472	2	-0.97179
FBgn0011754	10	0.52924	0.73396	0.98102	474	2	-0.73204	0.57021	0.75441	0.992874	473	1	-0.73204
FBgn0052568	10	0.63388	0.78744	0.984068	515	2	-0.38093	0.57021	0.75441	0.992874	474	2	-0.38093
FBgn0015296	10	0.027294	0.10093	0.98102	59	6	-0.17251	0.57279	0.75565	0.992874	475	1	-0.17251
FBgn0053554	10	0.12253	0.30364	0.98102	195	3	-0.89815	0.5739	0.75612	0.992874	476	2	-0.89815
FBgn0038721	10	0.99272	0.99314	0.994663	645	0	-0.56429	0.57498	0.75669	0.992874	477	2	-0.56429
FBgn0036964	9	0.81546	0.86712	0.990865	575	1	-0.013199	0.57633	0.73205	0.992874	478	2	-0.013199
FBgn0027492	10	0.99272	0.99314	0.994663	646	0	-0.97179	0.57644	0.75735	0.992874	479	2	-0.97179
FBgn0031561	9	0.43264	0.64199	0.98102	414	2	-0.97179	0.57795	0.73294	0.992874	480	2	-0.97179
FBgn0031441	10	0.47955	0.68964	0.98102	445	1	0.052226	0.58296	0.76091	0.992874	481	2	0.052226
FBgn0038524	10	0.10089	0.26978	0.98102	168	4	-0.4931	0.58309	0.76102	0.992874	482	2	-0.4931
FBgn0266084	10	0.041997	0.13807	0.98102	82	4	-0.26089	0.58385	0.7614	0.992874	483	2	-0.26089
FBgn0031995	10	0.99272	0.99314	0.994663	631	0	-0.27849	0.5879	0.76319	0.992874	484	2	-0.27849
FBgn0039098	10	0.42791	0.64548	0.98102	409	3	-0.21859	0.58867	0.76355	0.992874	485	2	-0.21859
FBgn0264895	8	0.0070571	0.030611	0.895833	23	5	-0.30454	0.60057	0.73548	0.992874	486	2	-0.30454
FBgn0033086	10	0.93266	0.9378	0.994663	607	1	-0.15835	0.61351	0.77573	0.992874	487	1	-0.15835
FBgn0030992	10	0.10873	0.28312	0.98102	173	3	-0.62378	0.61579	0.7771	0.992874	488	2	-0.62378
FBgn0035425	10	0.43596	0.65236	0.98102	417	3	-0.17255	0.61627	0.77735	0.992874	489	2	-0.17255
FBgn0031681	10	0.11832	0.29714	0.98102	189	4	-0.67398	0.61785	0.77815	0.992874	490	2	-0.67398
FBgn0051199	10	0.99272	0.99314	0.994663	650	0	-0.57129	0.61885	0.77861	0.992874	491	2	-0.57129
FBgn0053096	10	0.019045	0.073892	0.98102	44	6	-0.72383	0.62395	0.78107	0.992874	492	2	-0.72383
FBgn0001089	10	0.76048	0.86086	0.990865	557	2	0.042499	0.62941	0.7842	0.992874	493	2	0.042499
FBgn0039797	10	0.2004	0.41568	0.98102	265	4	-0.46922	0.63529	0.78772	0.992874	494	2	-0.46922
FBgn0260634	10	0.13422	0.32173	0.98102	204	3	-0.21326	0.63636	0.78822	0.992874	495	1	-0.21326
FBgn0033397	10	0.061311	0.18385	0.98102	109	5	-0.822	0.637	0.78848	0.992874	496	1	-0.822
FBgn0011826	10	0.085245	0.2364	0.98102	145	4	-0.54213	0.63826	0.78938	0.992874	497	2	-0.54213
FBgn0086708	10	0.99272	0.99314	0.994663	648	0	0.078455	0.6389	0.78961	0.992874	498	2	0.078455
FBgn0028427	10	0.21598	0.43752	0.98102	281	4	-0.32599	0.64173	0.79108	0.992874	499	2	-0.32599
FBgn0005198	3	0.090659	0.15604	0.98102	153	2	-0.35835	0.6455	0.64406	0.992874	500	0	-0.35835
FBgn0030559	10	0.094636	0.25666	0.98102	160	4	-0.74327	0.64578	0.79325	0.992874	501	1	-0.74327
FBgn0000384	10	0.00093075	0.0054077	0.503687	7	6	-0.97179	0.64671	0.79387	0.992874	502	1	-0.97179
FBgn0039125	10	0.028186	0.10358	0.98102	61	5	-0.53426	0.64794	0.79445	0.992874	503	2	-0.53426
FBgn0033677	6	0.42102	0.56615	0.98102	405	1	-0.34195	0.64827	0.71178	0.992874	504	1	-0.34195
FBgn0030623	10	0.021819	0.083381	0.98102	48	6	-0.8342	0.6501	0.79562	0.992874	505	1	-0.8342
FBgn0265042	10	0.0045524	0.022813	0.880266	16	2	-0.49018	0.6546	0.798	0.992874	506	2	-0.49018
FBgn0039115	10	0.39802	0.6205	0.98102	391	3	-0.065885	0.6573	0.79946	0.992874	507	2	-0.065885
FBgn0003134	10	0.025743	0.095948	0.98102	56	3	-0.97179	0.66158	0.80158	0.992874	508	1	-0.97179
FBgn0035703	10	0.71487	0.83277	0.990865	545	2	-0.047118	0.66356	0.80267	0.992874	509	2	-0.047118
FBgn0034265	10	0.0037695	0.019261	0.841075	14	7	-0.45331	0.66489	0.80339	0.992874	510	2	-0.45331
FBgn0032405	10	0.074187	0.21238	0.98102	126	3	-0.23994	0.66513	0.80352	0.992874	511	1	-0.23994
FBgn0028500	10	0.076182	0.21681	0.98102	132	2	-0.97179	0.6682	0.80516	0.992874	512	2	-0.97179
FBgn0032223	10	0.3413	0.5711	0.98102	361	3	-0.16317	0.66866	0.80545	0.992874	513	2	-0.16317
FBgn0003132	10	0.35504	0.58301	0.98102	369	3	-0.37629	0.66886	0.80551	0.992874	514	2	-0.37629
FBgn0000259	9	0.74881	0.84629	0.990865	552	1	-0.017253	0.66921	0.79043	0.992874	515	2	-0.017253
FBgn0259190	10	0.16639	0.36872	0.98102	231	3	0.013182	0.67149	0.80698	0.992874	516	2	0.013182
FBgn0024248	8	0.075076	0.197	0.98102	129	3	-0.39978	0.67182	0.79113	0.992874	517	2	-0.39978
FBgn0024811	10	0.42735	0.64499	0.98102	408	1	-0.97179	0.6756	0.80937	0.992874	518	2	-0.97179
FBgn0032650	10	0.44232	0.65782	0.98102	422	3	-0.47185	0.6793	0.81141	0.992874	519	2	-0.47185
FBgn0046332	10	0.48568	0.69525	0.98102	447	2	-0.53642	0.68072	0.81222	0.992874	520	1	-0.53642
FBgn0027794	10	0.094319	0.25596	0.98102	158	5	-0.51952	0.68528	0.815	0.992874	521	2	-0.51952
FBgn0034363	10	0.065319	0.19323	0.98102	116	2	-0.97179	0.68744	0.81628	0.992874	522	1	-0.97179
FBgn0035090	10	0.086673	0.23958	0.98102	147	4	-0.51578	0.68951	0.81745	0.992874	523	2	-0.51578
FBgn0083961	10	0.013337	0.054844	0.98102	32	4	-0.97179	0.68965	0.81755	0.992874	524	1	-0.97179
FBgn0036274	10	0.45095	0.6651	0.98102	426	3	-0.57947	0.69293	0.81946	0.992874	525	1	-0.57947
FBgn0085459	10	0.53064	0.73523	0.98102	477	2	-0.54565	0.69495	0.82045	0.992874	526	2	-0.54565
FBgn0038830	10	0.062876	0.1874	0.98102	112	4	-0.89988	0.70135	0.82453	0.992874	527	2	-0.89988
FBgn0036165	9	1.1265e-05	8.4108e-05	0.054839	1	5	-0.90034	0.70522	0.8152	0.992874	528	2	-0.90034
FBgn0004864	10	0.13678	0.32547	0.98102	205	3	-0.97179	0.70735	0.82773	0.992874	529	1	-0.97179
FBgn0267339	10	0.95326	0.95395	0.994663	616	1	-0.97179	0.71088	0.83003	0.992874	530	2	-0.97179
FBgn0267435	10	0.038069	0.12862	0.98102	76	5	-0.73065	0.71407	0.83209	0.992874	531	1	-0.73065
FBgn0050495	10	0.0069538	0.032649	0.895833	21	5	-0.5906	0.71447	0.83232	0.992874	532	2	-0.5906
FBgn0052451	10	0.53462	0.73757	0.98102	481	2	-0.0016743	0.71527	0.83284	0.992874	533	2	-0.0016743
FBgn0033047	10	0.43965	0.65564	0.98102	421	1	-0.10696	0.71725	0.83401	0.992874	534	2	-0.10696
FBgn0051719	6	0.54956	0.66825	0.98102	487	1	-0.21021	0.71769	0.74902	0.992874	535	1	-0.21021
FBgn0030679	10	0.6487	0.79521	0.984068	523	2	-0.7411	0.71961	0.83541	0.992874	536	2	-0.7411
FBgn0026417	10	0.50907	0.71607	0.98102	461	3	0.048565	0.72078	0.83622	0.992874	537	2	0.048565
FBgn0001974	5	0.63921	0.67274	0.98102	519	1	0.0045192	0.72159	0.7289	0.992874	538	1	0.0045192
FBgn0020386	10	0.018105	0.070785	0.98102	43	6	-0.23538	0.72719	0.83978	0.992874	539	2	-0.23538
FBgn0033192	10	0.3695	0.59507	0.98102	375	3	-0.97179	0.72719	0.83978	0.992874	540	2	-0.97179
FBgn0031461	10	0.0058302	0.028443	0.895833	20	5	-0.77525	0.73196	0.84258	0.992874	541	1	-0.77525
FBgn0036187	10	0.18497	0.39461	0.98102	251	4	-0.5379	0.73244	0.84296	0.992874	542	1	-0.5379
FBgn0038598	10	0.37916	0.60368	0.98102	382	3	-0.36587	0.73481	0.84451	0.992874	543	2	-0.36587
FBgn0036717	10	0.91105	0.92534	0.994663	597	1	-0.11245	0.73651	0.84552	0.992874	544	2	-0.11245
FBgn0003448	10	0.23712	0.46604	0.98102	305	4	-0.11154	0.73769	0.84624	0.992874	545	1	-0.11154
FBgn0003499	10	0.078384	0.22203	0.98102	133	4	-0.45434	0.73875	0.84699	0.992874	546	2	-0.45434
FBgn0266721	10	0.72215	0.83701	0.990865	547	1	-0.050099	0.7395	0.84748	0.992874	547	2	-0.050099
FBgn0030793	10	0.5419	0.74104	0.981241	484	2	-0.30733	0.73958	0.84753	0.992874	548	2	-0.30733
FBgn0035533	10	0.08149	0.22865	0.98102	143	4	-0.97179	0.74029	0.84804	0.992874	549	1	-0.97179
FBgn0030234	10	0.94112	0.94405	0.994663	611	1	-0.18387	0.74146	0.84888	0.992874	550	1	-0.18387
FBgn0020440	10	0.78056	0.87401	0.990865	566	1	-0.97179	0.74541	0.85143	0.992874	551	2	-0.97179
FBgn0038584	10	0.088033	0.24228	0.98102	149	5	-0.46787	0.74651	0.85212	0.992874	552	2	-0.46787
FBgn0039043	10	0.33726	0.56784	0.98102	358	3	-0.28838	0.74688	0.85229	0.992874	553	2	-0.28838
FBgn0020621	10	0.030358	0.109	0.98102	67	4	-0.10309	0.74747	0.85267	0.992874	554	1	-0.10309
FBgn0031533	10	0.87283	0.90842	0.994663	591	1	-0.50631	0.74761	0.85278	0.992874	555	2	-0.50631
FBgn0000464	10	0.40452	0.62598	0.98102	395	3	-0.97179	0.7529	0.85594	0.994492	556	1	-0.97179
FBgn0260972	10	0.11015	0.28518	0.98102	174	2	-0.97179	0.7558	0.85766	0.994492	557	1	-0.97179
FBgn0016794	9	0.5327	0.70698	0.98102	480	2	-0.212	0.76142	0.84995	0.992874	558	1	-0.212
FBgn0052196	7	0.24318	0.43005	0.98102	309	3	-0.47257	0.76423	0.80014	0.992874	559	1	-0.47257
FBgn0041191	10	0.39902	0.62135	0.98102	392	2	-0.24873	0.76639	0.86493	0.994492	560	2	-0.24873
FBgn0038485	10	0.031893	0.11285	0.98102	68	5	-0.62244	0.76668	0.8651	0.994492	561	1	-0.62244
FBgn0010395	10	0.21196	0.43206	0.98102	276	4	-0.97179	0.76668	0.8651	0.994492	562	1	-0.97179
FBgn0041789	10	0.05164	0.16077	0.98102	102	2	-0.97179	0.76811	0.86594	0.994492	563	2	-0.97179
FBgn0030539	10	0.025287	0.094404	0.98102	55	5	-0.47704	0.77185	0.86841	0.994492	564	2	-0.47704
FBgn0038862	10	0.1915	0.40363	0.98102	258	4	-0.86467	0.77444	0.87009	0.994492	565	1	-0.86467
FBgn0030840	10	0.30298	0.5379	0.98102	341	3	-0.25572	0.77485	0.87033	0.994492	566	2	-0.25572
FBgn0260779	10	0.19183	0.40419	0.98102	259	3	-0.62531	0.77555	0.8708	0.994492	567	2	-0.62531
FBgn0035983	10	0.99272	0.99314	0.994663	636	0	0.070934	0.77589	0.87094	0.994492	568	2	0.070934
FBgn0033020	5	0.9147	0.915	0.994663	600	0	0.1007	0.77914	0.77969	0.992874	569	1	0.1007
FBgn0037880	10	0.035595	0.12223	0.98102	71	5	-0.91997	0.78992	0.8805	0.996779	570	2	-0.91997
FBgn0030812	10	0.075981	0.2165	0.98102	131	4	-0.21203	0.79043	0.88089	0.996779	571	1	-0.21203
FBgn0030805	4	0.31537	0.43478	0.98102	348	1	-0.76264	0.79465	0.79556	0.992874	572	0	-0.76264
FBgn0062412	10	0.43495	0.65161	0.98102	416	2	-0.74964	0.79654	0.8851	0.996779	573	1	-0.74964
FBgn0029648	10	0.26176	0.49825	0.98102	325	2	-0.97179	0.79916	0.88564	0.996779	574	1	-0.97179
FBgn0001965	8	0.83963	0.86131	0.990865	579	1	0.0084791	0.81057	0.84616	0.992874	575	1	0.0084791
FBgn0030518	10	0.68493	0.81503	0.984068	539	1	0.024919	0.82308	0.89217	0.996779	576	1	0.024919
FBgn0037764	10	0.019897	0.07685	0.98102	46	6	-0.33694	0.82572	0.89295	0.996779	577	1	-0.33694
FBgn0028902	10	0.62443	0.78179	0.984068	512	2	-0.20371	0.83468	0.89521	0.996779	578	1	-0.20371
FBgn0029117	10	0.039531	0.13209	0.98102	78	4	-0.97179	0.83839	0.89642	0.996779	579	1	-0.97179
FBgn0039924	10	0.56563	0.75223	0.981371	490	2	-0.90023	0.85571	0.90205	0.996779	580	1	-0.90023
FBgn0037657	10	0.52895	0.73366	0.98102	473	3	-0.86207	0.86154	0.90387	0.996779	581	1	-0.86207
FBgn0042627	10	0.15903	0.35775	0.98102	224	3	-0.21409	0.86326	0.90451	0.996779	582	1	-0.21409
FBgn0032691	8	0.22433	0.41562	0.98102	293	1	-0.97179	0.86471	0.87567	0.996779	583	1	-0.97179
FBgn0036398	10	0.20298	0.41934	0.98102	269	3	-0.49088	0.86626	0.90547	0.996779	584	1	-0.49088
FBgn0259228	10	0.062531	0.1867	0.98102	110	4	-0.71745	0.86958	0.90681	0.996779	585	1	-0.71745
FBgn0036480	7	0.59734	0.72841	0.98102	506	1	-0.97179	0.87892	0.8795	0.996779	586	1	-0.97179
FBgn0053116	7	0.77025	0.80364	0.984068	562	1	-0.63304	0.88346	0.88345	0.996779	587	1	-0.63304
FBgn0034996	10	0.212	0.43208	0.98102	277	4	-0.74878	0.88688	0.91372	0.996779	588	1	-0.74878
FBgn0032381	10	0.23304	0.46065	0.98102	302	3	-0.31994	0.89337	0.91647	0.996779	589	1	-0.31994
FBgn0039241	10	0.042571	0.13956	0.98102	83	4	-0.69649	0.89607	0.91767	0.996779	590	1	-0.69649
FBgn0037504	10	0.29638	0.53236	0.98102	336	3	-0.27322	0.9009	0.91997	0.996779	591	1	-0.27322
FBgn0024698	9	0.36407	0.57518	0.98102	373	3	-0.84798	0.90154	0.90789	0.996779	592	1	-0.84798
FBgn0032642	10	0.17339	0.37845	0.98102	242	4	-0.59213	0.90382	0.92146	0.996779	593	1	-0.59213
FBgn0033095	10	0.24465	0.47635	0.98102	312	4	-0.17537	0.90401	0.92156	0.996779	594	1	-0.17537
FBgn0035742	10	0.38851	0.61217	0.98102	387	2	-0.49706	0.9061	0.92246	0.996779	595	1	-0.49706
FBgn0263987	5	0.2267	0.36053	0.98102	295	2	-0.16355	0.90864	0.90828	0.996779	596	0	-0.16355
FBgn0028847	10	0.21879	0.44141	0.98102	284	2	-0.86847	0.9087	0.92376	0.996779	597	1	-0.86847
FBgn0015295	10	0.028469	0.10441	0.98102	63	5	-0.5009	0.90906	0.924	0.996779	598	1	-0.5009
FBgn0020299	10	0.099697	0.26722	0.98102	165	4	-0.36341	0.90961	0.92427	0.996779	599	1	-0.36341
FBgn0035249	10	0.38085	0.60524	0.98102	383	3	-0.39474	0.91778	0.9284	0.996779	600	1	-0.39474
FBgn0040391	10	0.00030519	0.0021423	0.349194	4	7	-0.71477	0.92041	0.92999	0.996779	601	1	-0.71477
FBgn0037516	10	0.43213	0.64904	0.98102	413	2	-0.29889	0.92057	0.93009	0.996779	602	1	-0.29889
FBgn0030087	10	0.068065	0.19943	0.98102	120	2	-0.78738	0.92073	0.9302	0.996779	603	1	-0.78738
FBgn0261854	8	0.17153	0.35482	0.98102	238	3	-0.30375	0.92088	0.92031	0.996779	604	0	-0.30375
FBgn0031216	6	0.62714	0.70257	0.98102	513	1	-0.93271	0.92227	0.92167	0.996779	605	0	-0.93271
FBgn0033935	10	0.037204	0.12638	0.98102	74	3	-0.50845	0.92265	0.93121	0.996779	606	1	-0.50845
FBgn0039357	10	0.15527	0.35228	0.98102	221	2	-0.97179	0.92429	0.93204	0.996779	607	1	-0.97179
FBgn0003731	10	0.014041	0.057159	0.98102	33	5	-0.57872	0.92814	0.93452	0.996779	608	1	-0.57872
FBgn0040001	10	0.048267	0.15298	0.98102	93	5	-0.55602	0.9296	0.93548	0.996779	609	1	-0.55602
FBgn0020258	10	0.13882	0.32841	0.98102	207	2	-0.5063	0.9304	0.93588	0.996779	610	1	-0.5063
FBgn0015586	10	0.79616	0.88493	0.990865	572	1	-0.045687	0.93757	0.94106	0.996779	611	1	-0.045687
FBgn0264574	10	0.66489	0.80371	0.984068	529	2	-0.32237	0.94124	0.94398	0.996779	612	1	-0.32237
FBgn0259243	10	0.11237	0.2885	0.98102	176	2	-0.017381	0.94276	0.94522	0.996779	613	1	-0.017381
FBgn0027620	10	0.011479	0.04863	0.98102	30	4	-0.4729	0.94621	0.94796	0.996779	614	1	-0.4729
FBgn0033733	10	0.92851	0.93499	0.994663	605	1	-0.36019	0.94644	0.94807	0.996779	615	1	-0.36019
FBgn0086358	10	0.33528	0.56606	0.98102	357	2	-0.97179	0.94723	0.9487	0.996779	616	1	-0.97179
FBgn0015765	10	0.087912	0.24204	0.98102	148	2	-0.36496	0.94888	0.95	0.996779	617	1	-0.36496
FBgn0267487	10	0.11572	0.29338	0.98102	183	4	-0.97179	0.94888	0.95	0.996779	618	1	-0.97179
FBgn0010808	10	0.34518	0.57453	0.98102	364	3	-0.50968	0.94985	0.95076	0.996779	619	1	-0.50968
FBgn0037592	10	0.17871	0.38566	0.98102	247	4	-0.29933	0.9521	0.95291	0.996779	620	1	-0.29933
FBgn0041627	10	0.0015861	0.0087225	0.6319	9	7	-0.6303	0.95435	0.95491	0.996779	621	1	-0.6303
FBgn0260935	10	0.45597	0.66949	0.98102	431	3	-0.97179	0.95581	0.9563	0.996779	622	1	-0.97179
FBgn0050020	10	0.049172	0.15487	0.98102	96	5	-0.65383	0.95628	0.95683	0.996779	623	1	-0.65383
FBgn0022213	10	0.081478	0.22863	0.98102	142	4	-0.5752	0.95694	0.95746	0.996779	624	0	-0.5752
FBgn0035604	10	0.082946	0.23181	0.98102	144	3	-0.71172	0.96	0.96062	0.996779	625	0	-0.71172
FBgn0028563	10	0.32537	0.55753	0.98102	352	2	-0.55041	0.96112	0.96176	0.996779	626	0	-0.55041
FBgn0266064	10	0.18839	0.39934	0.98102	254	4	-0.464	0.9612	0.96185	0.996779	627	0	-0.464
FBgn0039622	10	0.049827	0.15652	0.98102	98	3	-0.22221	0.96622	0.96695	0.996779	628	0	-0.22221
FBgn0031420	10	0.028234	0.10376	0.98102	62	4	-0.50602	0.96645	0.96722	0.996779	629	0	-0.50602
FBgn0031462	10	0.015569	0.062225	0.98102	35	6	-0.51079	0.96812	0.9688	0.996779	630	0	-0.51079
FBgn0036156	10	0.22383	0.44822	0.98102	292	2	-0.27524	0.9691	0.96988	0.996779	631	0	-0.27524
FBgn0033889	10	0.081064	0.22768	0.98102	140	5	-0.27479	0.97082	0.97143	0.996779	632	0	-0.27479
FBgn0037672	10	0.19053	0.40248	0.98102	256	4	-0.51892	0.97324	0.97372	0.996779	633	0	-0.51892
FBgn0031042	10	0.21707	0.43921	0.98102	282	4	-0.09987	0.97585	0.97657	0.996779	634	0	-0.09987
FBgn0250819	10	0.48523	0.69485	0.98102	446	2	-0.25725	0.97645	0.97715	0.996779	635	0	-0.25725
FBgn0261832	10	0.16309	0.36393	0.98102	227	4	-0.84766	0.97848	0.97921	0.996779	636	0	-0.84766
FBgn0002413	10	0.0055178	0.027315	0.895833	19	6	-0.63272	0.97936	0.97994	0.996779	637	0	-0.63272
FBgn0032499	10	0.038008	0.12842	0.98102	75	3	-0.30089	0.98039	0.98094	0.996779	638	0	-0.30089
FBgn0030530	8	0.56808	0.71132	0.98102	491	2	-0.4164	0.98129	0.98102	0.996779	639	0	-0.4164
FBgn0037325	10	0.079925	0.2252	0.98102	137	5	-0.40325	0.9817	0.98219	0.996779	640	0	-0.40325
FBgn0038890	10	0.038417	0.12944	0.98102	77	4	-0.77637	0.98249	0.983	0.996779	641	0	-0.77637
FBgn0260645	9	0.18559	0.38911	0.98102	252	3	-0.68329	0.98385	0.983	0.996779	642	0	-0.68329
FBgn0020622	10	0.24313	0.47436	0.98102	308	4	-0.31748	0.98445	0.98515	0.996779	643	0	-0.31748
FBgn0038466	10	0.12893	0.31365	0.98102	199	4	-0.97179	0.98663	0.98723	0.996779	644	0	-0.97179
FBgn0032042	10	0.16457	0.36622	0.98102	229	3	-0.54693	0.9869	0.98758	0.996779	645	0	-0.54693
FBgn0260945	10	0.097358	0.2622	0.98102	162	3	-0.76235	0.98695	0.98761	0.996779	646	0	-0.76235
FBgn0261560	10	0.19549	0.40879	0.98102	261	4	-0.73606	0.9912	0.9917	0.997241	647	0	-0.73606
FBgn0036282	8	0.64181	0.76753	0.981371	520	1	-0.97179	0.99211	0.99216	0.997241	648	0	-0.97179
FBgn0037370	8	0.0032972	0.014719	0.738213	13	6	-0.39086	0.99262	0.99265	0.997241	649	0	-0.39086
FBgn0265267	10	0.14219	0.33307	0.98102	210	4	-0.78023	0.99671	0.99688	0.998895	650	0	-0.78023
FBgn0025632	10	0.10159	0.27127	0.98102	170	4	-0.54506	0.99725	0.99736	0.998895	651	0	-0.54506
FBgn0037826	8	0.030108	0.098432	0.98102	66	5	-0.97179	0.99948	0.9994	0.999401	652	0	-0.97179

## Sheet: S1E-1 rapa-15d
id	num	neg|score	neg|p-value	neg|fdr	neg|rank	neg|goodsgrna	neg|lfc	pos|score	pos|p-value	pos|fdr	pos|rank	pos|goodsgrna	pos|lfc
FBgn0033913	10	0.99159	0.99211	0.995161	628	0	0.95373	3.8391e-10	4.9476e-06	0.003226	1	6	0.95373
FBgn0020386	10	0.29612	0.52396	0.986454	323	2	0.56346	0.00013427	0.00097467	0.317742	2	8	0.56346
FBgn0010808	10	0.99159	0.99211	0.995161	632	0	-0.089532	0.0006071	0.003864	0.749355	3	4	-0.089532
FBgn0038258	10	0.078579	0.2217	0.986454	138	4	-0.28889	0.00078899	0.0047348	0.749355	4	2	-0.28889
FBgn0033047	10	0.49256	0.70021	0.986454	452	1	0.095743	0.0010073	0.005754	0.749355	5	5	0.095743
FBgn0265042	10	0.8678	0.90058	0.994099	587	1	0.16355	0.0015018	0.0082377	0.749355	6	4	0.16355
FBgn0037764	10	0.78614	0.87435	0.993145	562	1	0.35177	0.0019871	0.010702	0.749355	7	7	0.35177
FBgn0029999	7	0.58916	0.71629	0.986454	493	1	0.53929	0.0020775	0.0097516	0.749355	8	4	0.53929
FBgn0015582	9	0.049165	0.15048	0.919053	106	4	-0.41402	0.002129	0.011147	0.749355	9	1	-0.41402
FBgn0050378	10	0.032673	0.11217	0.897734	81	2	0.4531	0.002147	0.011493	0.749355	10	7	0.4531
FBgn0028988	10	0.026664	0.097086	0.889289	68	5	-0.37606	0.0039393	0.020052	0.949715	11	3	-0.37606
FBgn0053098	10	0.73707	0.84359	0.993145	544	2	0.057009	0.0043518	0.021893	0.949715	12	5	0.057009
FBgn0019990	10	0.5164	0.71814	0.986454	464	2	0.36755	0.0046031	0.02308	0.949715	13	6	0.36755
FBgn0030071	10	0.49342	0.70091	0.986454	454	1	0.47163	0.0047495	0.023783	0.949715	14	7	0.47163
FBgn0050293	10	0.33089	0.555	0.986454	350	2	0.3872	0.0048093	0.02406	0.949715	15	7	0.3872
FBgn0030518	10	0.0915	0.2496	0.986454	157	2	0.26415	0.0049325	0.024594	0.949715	16	6	0.26415
FBgn0033491	10	0.45477	0.66597	0.986454	425	3	0.098935	0.0049635	0.024763	0.949715	17	5	0.098935
FBgn0033128	10	0.933	0.93578	0.995161	610	1	0.33601	0.0068659	0.032223	0.963049	18	6	0.33601
FBgn0036827	10	0.18565	0.39258	0.986454	238	4	-0.26435	0.0070807	0.032857	0.963049	19	3	-0.26435
FBgn0024992	10	0.28208	0.51054	0.986454	316	1	0.12505	0.0084738	0.037982	0.963049	20	4	0.12505
FBgn0038167	10	0.49035	0.6982	0.986454	449	3	-1.0409	0.0086481	0.038586	0.963049	21	2	-1.0409
FBgn0053096	10	0.17382	0.37581	0.986454	224	2	0.37945	0.0091308	0.040337	0.963049	22	6	0.37945
FBgn0038438	9	0.98644	0.98548	0.995161	624	0	-0.036765	0.0095761	0.040298	0.963049	23	4	-0.036765
FBgn0037370	8	0.97813	0.97762	0.995161	619	0	0.32515	0.0097869	0.038695	0.963049	24	5	0.32515
FBgn0042711	10	0.8564	0.89636	0.994099	582	1	0.53351	0.010248	0.044375	0.963049	25	6	0.53351
FBgn0034730	10	0.53621	0.72799	0.988851	472	1	0.31006	0.010986	0.046789	0.963049	26	5	0.31006
FBgn0024754	10	0.99159	0.99211	0.995161	644	0	0.38469	0.011171	0.047472	0.963049	27	6	0.38469
FBgn0035769	10	0.54638	0.73296	0.98933	474	1	0.22828	0.011307	0.047927	0.963049	28	5	0.22828
FBgn0069056	10	0.81633	0.88297	0.993145	571	1	0.3314	0.012652	0.052449	0.963049	29	6	0.3314
FBgn0030840	10	0.99894	0.99903	0.999025	652	0	0.20536	0.014135	0.057367	0.963049	30	5	0.20536
FBgn0267698	10	0.89524	0.91305	0.994099	597	1	0.18417	0.014229	0.057703	0.963049	31	5	0.18417
FBgn0028978	10	0.75942	0.85856	0.993145	555	2	0.23828	0.014345	0.058069	0.963049	32	6	0.23828
FBgn0030680	10	0.17321	0.37493	0.986454	223	4	0.095603	0.014655	0.059	0.963049	33	5	0.095603
FBgn0039532	10	0.04089	0.13294	0.905343	94	2	0.21852	0.015185	0.060791	0.963049	34	5	0.21852
FBgn0038584	10	0.80467	0.87929	0.993145	568	1	0.32911	0.01572	0.062582	0.963049	35	6	0.32911
FBgn0030018	8	0.30665	0.50589	0.986454	332	2	0.061469	0.017502	0.06184	0.963049	36	4	0.061469
FBgn0028397	10	0.28326	0.51177	0.986454	317	3	-0.078876	0.018006	0.070399	0.963049	37	3	-0.078876
FBgn0037606	10	0.32093	0.54614	0.986454	340	1	-0.1662	0.018366	0.071527	0.963049	38	4	-0.1662
FBgn0050476	10	0.74355	0.84824	0.993145	545	1	0.19565	0.018866	0.073318	0.963049	39	6	0.19565
FBgn0038681	10	0.12145	0.29665	0.986454	190	2	-0.040898	0.019928	0.07688	0.963049	40	5	-0.040898
FBgn0052311	10	0.60014	0.76179	0.991391	496	2	0.013804	0.019976	0.077048	0.963049	41	5	0.013804
FBgn0031662	10	0.40566	0.62282	0.986454	402	2	0.17187	0.020945	0.080225	0.963049	42	5	0.17187
FBgn0260634	10	0.99159	0.99211	0.995161	631	0	0.17064	0.021358	0.081838	0.963049	43	6	0.17064
FBgn0001250	10	0.49853	0.7059	0.986454	459	1	0.24889	0.022488	0.085548	0.963049	44	6	0.24889
FBgn0035101	10	0.59567	0.75946	0.991391	495	2	-0.17478	0.022652	0.086043	0.963049	45	4	-0.17478
FBgn0034249	10	0.48021	0.68889	0.986454	440	3	0.14031	0.022654	0.086053	0.963049	46	4	0.14031
FBgn0015010	10	0.85722	0.89671	0.994099	583	1	0.20405	0.023242	0.088032	0.963049	47	6	0.20405
FBgn0036044	10	0.19573	0.4067	0.986454	249	3	0.097505	0.023919	0.090219	0.963049	48	5	0.097505
FBgn0026379	10	0.10873	0.27725	0.986454	174	2	0.20351	0.024077	0.090654	0.963049	49	4	0.20351
FBgn0003079	10	0.83747	0.88957	0.993145	577	1	-0.098567	0.024971	0.093464	0.963049	50	2	-0.098567
FBgn0028983	10	0.44089	0.65375	0.986454	419	3	0.19403	0.024971	0.093464	0.963049	51	5	0.19403
FBgn0032700	10	0.22287	0.44564	0.986454	279	3	0.072572	0.025672	0.095671	0.963049	52	4	0.072572
FBgn0037653	10	0.60947	0.76636	0.992179	498	1	-0.022843	0.025741	0.095928	0.963049	53	3	-0.022843
FBgn0004784	10	0.63809	0.78305	0.99274	508	2	0.060969	0.027305	0.10094	0.963049	54	4	0.060969
FBgn0036323	8	0.5665	0.70636	0.986454	478	1	-0.1216	0.0288	0.094602	0.963049	55	4	-0.1216
FBgn0037647	10	0.31083	0.5369	0.986454	333	3	0.21733	0.028822	0.10445	0.963049	56	4	0.21733
FBgn0028427	10	0.75907	0.85838	0.993145	554	2	-0.090357	0.028852	0.10451	0.963049	57	3	-0.090357
FBgn0038862	10	0.49035	0.6982	0.986454	448	3	-0.091203	0.029025	0.10487	0.963049	58	4	-0.091203
FBgn0001179	10	0.031893	0.11001	0.897734	79	3	-0.38291	0.029163	0.10528	0.963049	59	3	-0.38291
FBgn0000464	10	0.74609	0.85005	0.993145	549	1	-0.24837	0.030358	0.10825	0.963049	60	2	-0.24837
FBgn0026417	10	0.091253	0.24926	0.986454	156	3	0.2001	0.030554	0.10869	0.963049	61	5	0.2001
FBgn0036695	10	0.02407	0.090585	0.889289	62	2	0.079506	0.031552	0.11131	0.963049	62	4	0.079506
FBgn0035742	10	0.49683	0.70414	0.986454	456	2	-0.16108	0.031992	0.11242	0.963049	63	4	-0.16108
FBgn0266721	10	0.99159	0.99211	0.995161	630	0	0.15336	0.032319	0.11336	0.963049	64	5	0.15336
FBgn0260645	9	0.98644	0.98548	0.995161	627	0	0.31734	0.032716	0.10796	0.963049	65	5	0.31734
FBgn0052202	10	0.28444	0.51274	0.986454	318	2	-0.94806	0.033425	0.11618	0.963049	66	4	-0.94806
FBgn0033504	10	0.087882	0.24156	0.986454	151	3	0.10772	0.034657	0.11918	0.963049	67	4	0.10772
FBgn0266111	10	0.57493	0.74818	0.98976	485	2	-0.17319	0.037171	0.12561	0.963049	68	4	-0.17319
FBgn0034783	10	0.072382	0.2073	0.986454	133	3	0.030848	0.037661	0.12686	0.963049	69	5	0.030848
FBgn0028500	10	0.2363	0.46428	0.986454	288	3	-0.72476	0.038008	0.12775	0.963049	70	2	-0.72476
FBgn0031653	10	0.36839	0.5887	0.986454	377	2	-0.26776	0.038069	0.12795	0.963049	71	4	-0.26776
FBgn0261858	10	0.25048	0.48298	0.986454	298	3	-0.15868	0.038942	0.12998	0.963049	72	4	-0.15868
FBgn0034173	10	0.3483	0.57104	0.986454	363	3	0.23576	0.039208	0.13077	0.963049	73	5	0.23576
FBgn0034789	10	0.41393	0.62992	0.986454	409	3	-0.10824	0.039531	0.13146	0.963049	74	2	-0.10824
FBgn0051624	7	0.15011	0.30227	0.986454	201	1	0.3739	0.040182	0.11744	0.963049	75	4	0.3739
FBgn0036018	10	0.010234	0.043791	0.854744	33	3	-0.97406	0.041052	0.13504	0.963049	76	3	-0.97406
FBgn0050495	10	0.31334	0.53917	0.986454	336	2	-0.052726	0.041249	0.1354	0.963049	77	3	-0.052726
FBgn0003091	10	0.43211	0.64578	0.986454	416	1	0.28388	0.042186	0.13798	0.963049	78	5	0.28388
FBgn0035508	10	0.36902	0.58916	0.986454	378	3	-0.19678	0.042695	0.13925	0.963049	79	3	-0.19678
FBgn0046692	10	0.99159	0.99211	0.995161	648	0	0.15277	0.0433	0.14065	0.963049	80	4	0.15277
FBgn0260945	10	0.99159	0.99211	0.995161	641	0	-0.11826	0.04416	0.14276	0.963049	81	3	-0.11826
FBgn0035995	10	0.48341	0.69191	0.986454	443	2	0.24816	0.044323	0.14322	0.963049	82	5	0.24816
FBgn0039777	9	0.050676	0.1543	0.922965	108	1	0.13864	0.044763	0.13947	0.963049	83	4	0.13864
FBgn0038197	4	0.53136	0.55748	0.986454	469	1	0.44552	0.045299	0.10677	0.963049	84	2	0.44552
FBgn0050020	10	0.34686	0.5696	0.986454	361	3	0.14505	0.045459	0.14616	0.963049	85	4	0.14505
FBgn0000036	10	0.0039393	0.020052	0.800312	14	3	-0.032192	0.045578	0.14644	0.963049	86	4	-0.032192
FBgn0030793	10	0.042571	0.13732	0.911861	98	4	-0.31586	0.045603	0.14653	0.963049	87	3	-0.31586
FBgn0026317	10	0.57535	0.74839	0.98976	486	1	0.029411	0.045613	0.14656	0.963049	88	5	0.029411
FBgn0001187	10	0.57029	0.74586	0.98976	481	2	-0.092362	0.047339	0.15056	0.963049	89	2	-0.092362
FBgn0037156	9	0.69025	0.80288	0.993145	530	1	0.32657	0.04792	0.14769	0.963049	90	5	0.32657
FBgn0033917	10	0.10445	0.27061	0.986454	167	3	0.26753	0.048175	0.15228	0.963049	91	4	0.26753
FBgn0005775	10	0.87791	0.90506	0.994099	589	1	0.40919	0.048538	0.15302	0.963049	92	5	0.40919
FBgn0039796	10	0.21308	0.4321	0.986454	263	4	-0.26051	0.049245	0.15458	0.963049	93	4	-0.26051
FBgn0022800	10	0.70261	0.8217	0.993145	535	1	-0.023415	0.049248	0.15458	0.963049	94	3	-0.023415
FBgn0260398	10	0.045223	0.14382	0.919053	100	5	-0.4321	0.049472	0.15518	0.963049	95	3	-0.4321
FBgn0035143	9	0.98644	0.98548	0.995161	626	0	0.019884	0.050223	0.15352	0.963049	96	4	0.019884
FBgn0023169	10	0.85529	0.89595	0.994099	581	1	0.26009	0.050602	0.15778	0.963049	97	5	0.26009
FBgn0003719	10	0.016401	0.064571	0.86129	46	4	-0.033503	0.050887	0.15851	0.963049	98	4	-0.033503
FBgn0267033	8	0.57851	0.71554	0.986454	487	2	0.099852	0.051421	0.14795	0.963049	99	4	0.099852
FBgn0035522	10	0.033425	0.11414	0.897734	82	2	-0.18777	0.051656	0.16038	0.963049	100	5	-0.18777
FBgn0030342	10	0.30629	0.53274	0.986454	330	3	-0.28121	0.054646	0.16793	0.963049	101	2	-0.28121
FBgn0063667	10	0.68993	0.81348	0.993145	529	2	0.038434	0.054755	0.1683	0.963049	102	5	0.038434
FBgn0052196	7	0.47703	0.6247	0.986454	435	2	-0.035884	0.055315	0.15033	0.963049	103	2	-0.035884
FBgn0036964	9	0.98644	0.98548	0.995161	625	0	-0.30463	0.056088	0.1679	0.963049	104	1	-0.30463
FBgn0029870	10	0.40101	0.61867	0.986454	398	2	-0.090571	0.056315	0.17201	0.963049	105	4	-0.090571
FBgn0033574	10	0.29028	0.51821	0.986454	322	2	-0.21013	0.056861	0.17313	0.963049	106	4	-0.21013
FBgn0035090	10	0.21879	0.44001	0.986454	272	2	-0.15461	0.060622	0.18202	0.963049	107	3	-0.15461
FBgn0024222	10	0.2891	0.5172	0.986454	321	3	-0.1219	0.060674	0.18208	0.963049	108	3	-0.1219
FBgn0026323	10	0.72685	0.83682	0.993145	539	1	-0.51915	0.061509	0.18397	0.963049	109	3	-0.51915
FBgn0029131	7	0.85757	0.85895	0.993145	584	1	0.27622	0.062112	0.16512	0.963049	110	4	0.27622
FBgn0034202	10	0.1627	0.35965	0.986454	214	2	0.023106	0.062122	0.18535	0.963049	111	3	0.023106
FBgn0037678	10	0.2098	0.42741	0.986454	260	3	-0.032681	0.062122	0.18535	0.963049	112	3	-0.032681
FBgn0030332	10	0.32779	0.55239	0.986454	346	3	0.12866	0.063874	0.18946	0.963049	113	5	0.12866
FBgn0004118	10	0.44008	0.65315	0.986454	418	2	-0.055094	0.064891	0.19182	0.963049	114	3	-0.055094
FBgn0259152	10	0.058146	0.1748	0.935663	120	4	-0.71424	0.065098	0.19236	0.963049	115	2	-0.71424
FBgn0037714	10	0.42639	0.6407	0.986454	414	1	0.0050051	0.065521	0.1934	0.963049	116	4	0.0050051
FBgn0037516	10	0.10569	0.27265	0.986454	169	4	-0.49004	0.066583	0.19577	0.963049	117	2	-0.49004
FBgn0038515	10	0.74541	0.84956	0.993145	547	2	-0.097776	0.067038	0.19675	0.963049	118	3	-0.097776
FBgn0038485	10	0.39317	0.61168	0.986454	394	3	0.20575	0.067622	0.1982	0.963049	119	4	0.20575
FBgn0259243	10	0.12147	0.29669	0.986454	191	3	-0.20546	0.068065	0.19912	0.963049	120	3	-0.20546
FBgn0027570	10	0.12005	0.29446	0.986454	188	2	0.25396	0.068523	0.19994	0.963049	121	5	0.25396
FBgn0028538	10	0.46625	0.67621	0.986454	430	1	0.08484	0.068523	0.19994	0.963049	122	5	0.08484
FBgn0044826	10	0.89145	0.91134	0.994099	594	1	-0.10983	0.068556	0.2	0.963049	123	3	-0.10983
FBgn0001281	10	0.3767	0.5963	0.986454	385	1	0.10417	0.069546	0.20212	0.963049	124	4	0.10417
FBgn0000273	10	0.13955	0.32502	0.986454	196	2	0.13867	0.070752	0.20467	0.963049	125	5	0.13867
FBgn0036346	10	0.46804	0.67779	0.986454	431	2	0.016726	0.071024	0.20531	0.963049	126	2	0.016726
FBgn0033095	10	0.036527	0.12215	0.899964	87	5	-0.2754	0.071849	0.20706	0.963049	127	3	-0.2754
FBgn0265268	10	0.31534	0.54107	0.986454	338	2	-0.1596	0.072382	0.20804	0.963049	128	4	-0.1596
FBgn0030425	10	0.3187	0.54416	0.986454	339	2	-0.067213	0.0725	0.20827	0.963049	129	3	-0.067213
FBgn0032405	10	0.40991	0.6266	0.986454	406	3	-0.17	0.073181	0.20977	0.963049	130	2	-0.17
FBgn0024326	10	0.39027	0.60905	0.986454	391	3	0.10069	0.073381	0.21028	0.963049	131	5	0.10069
FBgn0027342	10	0.99884	0.99896	0.999025	651	0	0.20783	0.073914	0.21148	0.963049	132	5	0.20783
FBgn0002174	10	0.79043	0.87554	0.993145	564	1	-0.093857	0.073974	0.21167	0.963049	133	2	-0.093857
FBgn0086708	10	0.020875	0.079918	0.889289	54	4	-0.25068	0.074051	0.21188	0.963049	134	4	-0.25068
FBgn0030359	10	0.27856	0.50755	0.986454	313	1	-0.74954	0.074075	0.2119	0.963049	135	3	-0.74954
FBgn0051826	10	0.92873	0.93254	0.995161	608	1	-0.24061	0.074971	0.21383	0.963049	136	4	-0.24061
FBgn0028847	10	0.89679	0.91388	0.994099	598	1	-0.075338	0.075647	0.21547	0.963049	137	2	-0.075338
FBgn0031463	10	0.62657	0.77604	0.992179	505	2	-0.019356	0.076916	0.2182	0.963049	138	2	-0.019356
FBgn0023512	10	0.013337	0.054408	0.86129	38	2	0.21285	0.077501	0.21961	0.963049	139	5	0.21285
FBgn0022382	7	0.012638	0.047224	0.86129	36	2	-0.033592	0.078443	0.19936	0.963049	140	1	-0.033592
FBgn0034567	10	0.49808	0.70544	0.986454	458	2	0.31799	0.07845	0.22199	0.963049	141	5	0.31799
FBgn0020236	10	0.77168	0.86765	0.993145	557	2	-0.023731	0.078597	0.22226	0.963049	142	3	-0.023731
FBgn0264357	10	0.0078003	0.035053	0.800312	25	4	0.057935	0.080022	0.22522	0.963049	143	4	0.057935
FBgn0003356	10	0.060631	0.18082	0.935663	125	3	-0.042072	0.080371	0.22598	0.963049	144	4	-0.042072
FBgn0033246	10	0.034955	0.11789	0.899964	85	2	-0.68274	0.080582	0.22642	0.963049	145	2	-0.68274
FBgn0030384	10	0.3472	0.57006	0.986454	362	2	-0.19295	0.080582	0.22642	0.963049	146	1	-0.19295
FBgn0283536	10	0.21906	0.44038	0.986454	273	3	-0.82759	0.081354	0.22827	0.963049	147	3	-0.82759
FBgn0021796	10	0.29946	0.52685	0.986454	326	2	0.087141	0.082582	0.23084	0.963049	148	5	0.087141
FBgn0034307	10	0.51832	0.71917	0.986454	465	2	0.030516	0.082745	0.23117	0.963049	149	4	0.030516
FBgn0034700	10	0.89188	0.91154	0.994099	595	1	0.032196	0.082773	0.23121	0.963049	150	5	0.032196
FBgn0004638	10	0.37359	0.59347	0.986454	384	2	-1.0409	0.083242	0.23221	0.963049	151	3	-1.0409
FBgn0030964	10	0.083834	0.23301	0.986454	146	4	-0.29743	0.085315	0.23645	0.963049	152	2	-0.29743
FBgn0052451	10	0.0067561	0.031214	0.800312	21	6	-0.46428	0.085315	0.23645	0.963049	153	2	-0.46428
FBgn0004657	10	0.99159	0.99211	0.995161	638	0	0.062821	0.085691	0.23724	0.963049	154	3	0.062821
FBgn0040368	10	0.16412	0.36205	0.986454	216	2	-0.06536	0.086221	0.23843	0.963049	155	3	-0.06536
FBgn0010549	10	0.37047	0.59048	0.986454	381	3	-0.068687	0.089339	0.24522	0.963049	156	4	-0.068687
FBgn0033569	10	0.73196	0.84009	0.993145	541	1	0.083029	0.090233	0.24717	0.963049	157	5	0.083029
FBgn0050424	5	0.62323	0.65584	0.986454	504	1	0.24242	0.092011	0.19838	0.963049	158	3	0.24242
FBgn0019890	10	0.83468	0.8886	0.993145	575	1	0.11358	0.092947	0.253	0.963049	159	3	0.11358
FBgn0030674	5	0.68567	0.69876	0.986454	526	1	-1.0409	0.093263	0.20081	0.963049	160	2	-1.0409
FBgn0038705	10	0.16373	0.36148	0.986454	215	4	0.11046	0.095149	0.25757	0.963049	161	5	0.11046
FBgn0041191	10	0.0086481	0.038052	0.800312	31	2	-0.13548	0.095301	0.25788	0.963049	162	3	-0.13548
FBgn0032519	10	0.40251	0.6199	0.986454	400	2	-0.26706	0.096555	0.26057	0.963049	163	3	-0.26706
FBgn0259166	9	0.98644	0.98548	0.995161	622	0	-1.0409	0.10068	0.25204	0.963049	164	3	-1.0409
FBgn0260646	10	0.10447	0.27065	0.986454	168	3	0.079065	0.10087	0.26935	0.963049	165	4	0.079065
FBgn0264078	10	0.18158	0.38657	0.986454	235	4	-0.25564	0.10302	0.2728	0.963049	166	1	-0.25564
FBgn0033706	9	0.91975	0.91888	0.994099	605	1	0.070544	0.10382	0.25696	0.963049	167	4	0.070544
FBgn0000560	10	0.065098	0.19135	0.967117	129	2	-0.60889	0.10612	0.27781	0.963049	168	3	-0.60889
FBgn0267487	10	0.79427	0.87669	0.993145	565	1	-0.80248	0.10801	0.28057	0.963049	169	4	-0.80248
FBgn0029522	10	0.09415	0.25379	0.986454	160	2	-0.31303	0.10801	0.28057	0.963049	170	2	-0.31303
FBgn0035046	10	0.49752	0.70487	0.986454	457	2	-0.036946	0.10962	0.28286	0.963049	171	4	-0.036946
FBgn0036165	9	0.6053	0.74414	0.98976	497	2	0.057673	0.10972	0.26623	0.963049	172	4	0.057673
FBgn0022213	10	0.82408	0.88551	0.993145	574	1	0.15566	0.11041	0.28419	0.963049	173	4	0.15566
FBgn0042693	10	0.64016	0.78414	0.99274	509	2	-0.32608	0.1111	0.2851	0.963049	174	3	-0.32608
FBgn0031441	10	0.3514	0.57389	0.986454	367	2	-4.5712e-05	0.11161	0.28579	0.963049	175	4	-4.5712e-05
FBgn0034265	10	0.082775	0.23084	0.986454	145	3	0.019782	0.11255	0.28733	0.963049	176	4	0.019782
FBgn0260768	10	0.99159	0.99211	0.995161	642	0	0.028893	0.1134	0.28863	0.963049	177	3	0.028893
FBgn0032304	10	0.24771	0.48024	0.986454	296	4	-0.03423	0.1144	0.29007	0.963049	178	4	-0.03423
FBgn0037039	10	0.88776	0.90948	0.994099	593	1	0.081889	0.11524	0.29124	0.963049	179	4	0.081889
FBgn0003890	8	0.65446	0.77679	0.992179	514	2	-0.30598	0.11556	0.27342	0.963049	180	2	-0.30598
FBgn0034936	10	0.33455	0.55855	0.986454	354	2	0.066099	0.11582	0.29206	0.963049	181	3	0.066099
FBgn0027356	8	0.97813	0.97762	0.995161	620	0	0.17714	0.11717	0.27637	0.963049	182	4	0.17714
FBgn0034356	10	0.035644	0.11972	0.899964	86	4	-0.083019	0.11723	0.29405	0.963049	183	3	-0.083019
FBgn0017561	10	0.20989	0.42755	0.986454	262	1	-0.38818	0.11729	0.29407	0.963049	184	4	-0.38818
FBgn0037826	8	0.56765	0.70723	0.986454	480	2	-0.56483	0.11863	0.27913	0.963049	185	3	-0.56483
FBgn0034029	10	0.0068547	0.03162	0.800312	22	4	-0.16014	0.11864	0.29623	0.963049	186	3	-0.16014
FBgn0030234	10	0.21499	0.43473	0.986454	266	2	-0.34599	0.11907	0.29694	0.963049	187	4	-0.34599
FBgn0023023	10	0.67324	0.80311	0.993145	520	2	-0.0085386	0.12005	0.29838	0.963049	188	4	-0.0085386
FBgn0259190	10	0.35256	0.57496	0.986454	369	2	0.15921	0.12198	0.30139	0.963049	189	3	0.15921
FBgn0032372	10	0.61579	0.77014	0.992179	502	2	-0.15496	0.12217	0.30172	0.963049	190	4	-0.15496
FBgn0038979	10	0.44243	0.65511	0.986454	420	2	-0.16459	0.12241	0.30208	0.963049	191	4	-0.16459
FBgn0283499	10	0.10015	0.26351	0.986454	165	2	-0.22495	0.12323	0.30345	0.963049	192	4	-0.22495
FBgn0030539	10	0.0083189	0.036805	0.800312	29	5	-0.6716	0.12426	0.30493	0.963049	193	1	-0.6716
FBgn0037855	10	0.063403	0.18725	0.961316	126	3	-0.15776	0.12435	0.30509	0.963049	194	3	-0.15776
FBgn0031995	10	0.49527	0.70255	0.986454	455	2	-0.94083	0.12522	0.30657	0.963049	195	4	-0.94083
FBgn0044047	10	0.41314	0.62922	0.986454	407	2	-0.05964	0.12536	0.30674	0.963049	196	3	-0.05964
FBgn0030850	10	0.99159	0.99211	0.995161	629	0	0.24633	0.12579	0.30744	0.963049	197	4	0.24633
FBgn0036489	4	0.4808	0.52199	0.986454	442	1	-0.84529	0.12643	0.22093	0.963049	198	1	-0.84529
FBgn0028562	10	0.33528	0.55929	0.986454	355	2	-0.10658	0.12706	0.3093	0.963049	199	3	-0.10658
FBgn0000565	10	0.015106	0.060147	0.86129	43	5	-0.69598	0.12845	0.31154	0.963049	200	2	-0.69598
FBgn0038870	10	0.16696	0.36609	0.986454	220	3	-0.1346	0.12951	0.31317	0.963049	201	4	-0.1346
FBgn0266696	10	0.24694	0.47923	0.986454	295	4	-0.041951	0.12985	0.31371	0.963049	202	3	-0.041951
FBgn0010501	10	0.29873	0.52614	0.986454	325	3	-0.45549	0.13111	0.31564	0.963049	203	4	-0.45549
FBgn0038016	10	0.23382	0.46089	0.986454	283	3	0.24664	0.13182	0.31689	0.963049	204	4	0.24664
FBgn0265137	10	0.010213	0.043692	0.854744	32	2	-0.99129	0.13401	0.32024	0.963049	205	2	-0.99129
FBgn0015300	10	0.38693	0.60602	0.986454	390	2	-0.23576	0.13592	0.32304	0.963049	206	4	-0.23576
FBgn0035059	10	0.20477	0.41984	0.986454	255	2	-0.21983	0.13609	0.32332	0.963049	207	2	-0.21983
FBgn0000039	10	0.41683	0.63234	0.986454	411	3	-0.017846	0.13651	0.32389	0.963049	208	4	-0.017846
FBgn0265193	10	0.00055139	0.0034682	0.555914	4	6	-0.49544	0.13801	0.32598	0.963049	209	2	-0.49544
FBgn0029661	4	0.23868	0.35591	0.986454	290	1	-0.036828	0.13948	0.23701	0.963049	210	1	-0.036828
FBgn0030293	10	0.16926	0.36943	0.986454	222	4	-0.17426	0.13964	0.32848	0.963049	211	3	-0.17426
FBgn0032871	10	0.21636	0.43663	0.986454	269	2	0.0077231	0.14218	0.33192	0.963049	212	3	0.0077231
FBgn0035983	10	0.34878	0.57148	0.986454	364	3	-0.014006	0.14457	0.33536	0.963049	213	4	-0.014006
FBgn0036038	10	0.90629	0.91887	0.994099	600	1	0.088646	0.14492	0.33586	0.963049	214	4	0.088646
FBgn0040001	10	0.11742	0.29018	0.986454	184	4	-0.44994	0.14505	0.33602	0.963049	215	2	-0.44994
FBgn0050268	10	0.053588	0.16388	0.929116	114	5	-0.98421	0.14505	0.33602	0.963049	216	1	-0.98421
FBgn0037679	10	0.25557	0.48751	0.986454	302	3	0.15422	0.14675	0.33864	0.963049	217	4	0.15422
FBgn0027101	10	0.99159	0.99211	0.995161	634	0	-0.57475	0.14732	0.33945	0.963049	218	3	-0.57475
FBgn0020622	10	0.46279	0.6731	0.986454	428	2	-0.23999	0.14778	0.34013	0.963049	219	2	-0.23999
FBgn0029147	10	0.11237	0.2828	0.986454	178	4	-0.32896	0.15045	0.34403	0.963049	220	4	-0.32896
FBgn0034350	9	0.98644	0.98548	0.995161	623	0	0.18625	0.15139	0.33504	0.963049	221	3	0.18625
FBgn0039421	10	0.059261	0.17753	0.935663	121	4	-0.76356	0.15167	0.34617	0.963049	222	3	-0.76356
FBgn0053169	10	0.2163	0.43651	0.986454	268	3	-0.40723	0.15188	0.34644	0.963049	223	3	-0.40723
FBgn0031875	10	0.04726	0.14888	0.919053	105	5	-0.45977	0.15244	0.34724	0.963049	224	4	-0.45977
FBgn0001965	8	0.053631	0.15083	0.919053	115	2	0.041879	0.15448	0.33376	0.963049	225	3	0.041879
FBgn0062412	10	0.11963	0.29386	0.986454	187	4	-0.62901	0.15459	0.35042	0.963049	226	2	-0.62901
FBgn0264340	10	0.75065	0.85304	0.993145	550	1	0.084663	0.15847	0.35594	0.963049	227	4	0.084663
FBgn0032749	10	0.0242	0.090921	0.889289	63	2	-0.48288	0.15957	0.35765	0.963049	228	4	-0.48288
FBgn0015279	9	0.14893	0.32995	0.986454	200	1	-0.073045	0.16009	0.34882	0.963049	229	4	-0.073045
FBgn0033656	10	0.79005	0.87545	0.993145	563	1	-0.22218	0.16135	0.36044	0.963049	230	2	-0.22218
FBgn0025469	10	0.1166	0.28912	0.986454	183	3	-0.16214	0.16185	0.36119	0.963049	231	3	-0.16214
FBgn0053100	10	0.48653	0.69484	0.986454	445	1	0.15219	0.16242	0.36194	0.963049	232	4	0.15219
FBgn0028717	10	0.69074	0.81389	0.993145	531	2	-0.072798	0.16716	0.36886	0.963049	233	3	-0.072798
FBgn0004108	10	0.65224	0.79106	0.993145	511	2	-0.27098	0.16867	0.37095	0.963049	234	2	-0.27098
FBgn0020258	10	0.096583	0.25774	0.986454	162	4	-0.67652	0.16936	0.37203	0.963049	235	3	-0.67652
FBgn0014427	10	0.018571	0.072081	0.889289	49	5	-0.16327	0.17057	0.37381	0.963049	236	4	-0.16327
FBgn0031610	10	0.61149	0.76757	0.992179	499	1	0.018075	0.1709	0.37421	0.963049	237	4	0.018075
FBgn0039357	10	0.15483	0.34781	0.986454	206	3	-1.0409	0.17095	0.37423	0.963049	238	2	-1.0409
FBgn0003028	10	0.16001	0.35561	0.986454	211	3	-0.39592	0.17097	0.37427	0.963049	239	3	-0.39592
FBgn0032381	10	0.10588	0.27302	0.986454	170	3	-0.17442	0.1714	0.37489	0.963049	240	2	-0.17442
FBgn0000711	10	0.039053	0.12848	0.900763	93	5	-0.21549	0.1714	0.37489	0.963049	241	1	-0.21549
FBgn0037688	10	0.536	0.72788	0.988851	470	2	0.010167	0.1714	0.37489	0.963049	242	3	0.010167
FBgn0037880	10	0.067723	0.19758	0.986454	130	4	-0.46939	0.1714	0.37489	0.963049	243	3	-0.46939
FBgn0063495	10	0.8634	0.89895	0.994099	586	1	-0.67149	0.1714	0.37489	0.963049	244	1	-0.67149
FBgn0014141	10	0.071836	0.20626	0.986454	132	4	-0.52704	0.17267	0.37677	0.963049	245	2	-0.52704
FBgn0031462	10	0.21798	0.43888	0.986454	271	4	-0.32885	0.17298	0.37709	0.963049	246	3	-0.32885
FBgn0030956	10	0.57132	0.74631	0.98976	482	2	-0.66508	0.17321	0.37737	0.963049	247	4	-0.66508
FBgn0030620	10	0.025525	0.094107	0.889289	66	4	-0.32909	0.17439	0.37893	0.963049	248	3	-0.32909
FBgn0061469	10	0.89441	0.91259	0.994099	596	1	0.052899	0.17554	0.38049	0.963049	249	4	0.052899
FBgn0032664	10	0.36735	0.58792	0.986454	376	1	0.0034103	0.17554	0.38049	0.963049	250	4	0.0034103
FBgn0027779	10	0.92249	0.92836	0.995161	606	1	0.029303	0.17554	0.38049	0.963049	251	4	0.029303
FBgn0083141	10	0.043059	0.13846	0.911861	99	4	-0.43416	0.17909	0.38546	0.963049	252	3	-0.43416
FBgn0051719	6	0.83817	0.83814	0.993145	578	0	0.012301	0.18006	0.33988	0.963049	253	2	0.012301
FBgn0024740	10	0.33199	0.55594	0.986454	352	3	-0.13258	0.18073	0.38773	0.963049	254	3	-0.13258
FBgn0036156	10	0.17471	0.37695	0.986454	227	4	-0.42835	0.18135	0.38852	0.963049	255	2	-0.42835
FBgn0039125	10	0.99159	0.99211	0.995161	645	0	-0.046754	0.18247	0.39011	0.963049	256	3	-0.046754
FBgn0030761	10	0.32817	0.55273	0.986454	347	3	-0.046287	0.18266	0.3904	0.963049	257	3	-0.046287
FBgn0052425	10	0.40893	0.6257	0.986454	404	2	-0.51539	0.18568	0.39482	0.963049	258	3	-0.51539
FBgn0262103	10	0.99159	0.99211	0.995161	633	0	0.062316	0.18775	0.39775	0.963049	259	4	0.062316
FBgn0023197	10	0.66749	0.79969	0.993145	519	2	0.054839	0.18805	0.39815	0.963049	260	4	0.054839
FBgn0030538	8	0.2364	0.42581	0.986454	289	3	-0.13017	0.18816	0.3728	0.963049	261	3	-0.13017
FBgn0262866	9	0.58612	0.73205	0.98933	490	1	-1.0409	0.18823	0.39283	0.963049	262	3	-1.0409
FBgn0035469	10	0.34494	0.56787	0.986454	359	3	-0.042572	0.189	0.39959	0.963049	263	3	-0.042572
FBgn0036659	10	0.1111	0.28086	0.986454	177	4	-0.0089762	0.19067	0.40197	0.963049	264	3	-0.0089762
FBgn0037325	10	0.39702	0.61519	0.986454	396	1	0.18671	0.19115	0.40252	0.963049	265	4	0.18671
FBgn0002413	10	0.01565	0.062087	0.86129	44	3	-0.3577	0.19118	0.40257	0.963049	266	2	-0.3577
FBgn0036932	10	0.28106	0.5097	0.986454	315	2	-0.05475	0.1941	0.40646	0.963049	267	4	-0.05475
FBgn0030805	4	0.85212	0.85341	0.993145	580	0	-0.41757	0.1949	0.30462	0.963049	268	2	-0.41757
FBgn0004861	10	0.5234	0.72169	0.986454	468	2	0.20097	0.19698	0.4103	0.963049	269	4	0.20097
FBgn0036118	10	0.060244	0.17995	0.935663	124	4	-0.10168	0.19776	0.41127	0.963049	270	4	-0.10168
FBgn0031533	10	0.028822	0.10225	0.889289	73	1	-0.42911	0.19812	0.4118	0.963049	271	4	-0.42911
FBgn0037579	10	0.99159	0.99211	0.995161	649	0	-0.10804	0.19825	0.412	0.963049	272	3	-0.10804
FBgn0033860	10	0.041862	0.13539	0.910043	97	4	-0.69337	0.19826	0.41201	0.963049	273	2	-0.69337
FBgn0052105	10	0.20984	0.42749	0.986454	261	4	-0.13935	0.19832	0.41211	0.963049	274	2	-0.13935
FBgn0085447	10	0.046019	0.14592	0.919053	102	3	-0.058172	0.19962	0.41391	0.963049	275	2	-0.058172
FBgn0040297	10	0.69245	0.81496	0.993145	533	2	-0.037074	0.20208	0.41758	0.963049	276	4	-0.037074
FBgn0027083	10	0.038808	0.12781	0.900763	92	4	-0.082616	0.20298	0.41875	0.963049	277	2	-0.082616
FBgn0050428	10	0.78337	0.87358	0.993145	561	1	-0.11581	0.20348	0.41951	0.963049	278	1	-0.11581
FBgn0040370	10	0.18074	0.38547	0.986454	233	3	-0.12198	0.20379	0.41987	0.963049	279	3	-0.12198
FBgn0000382	10	0.083925	0.23313	0.986454	147	5	-0.061332	0.20476	0.42129	0.963049	280	3	-0.061332
FBgn0024329	10	0.57425	0.74781	0.98976	484	1	-0.125	0.20605	0.42305	0.963049	281	3	-0.125
FBgn0031187	10	0.4778	0.68679	0.986454	438	1	-0.44704	0.20734	0.42479	0.963049	282	2	-0.44704
FBgn0053159	10	0.45095	0.66259	0.986454	424	3	-0.055163	0.20743	0.42495	0.963049	283	3	-0.055163
FBgn0039049	10	0.52107	0.72063	0.986454	466	2	-0.46263	0.20743	0.42495	0.963049	284	3	-0.46263
FBgn0003132	10	0.034022	0.11566	0.897734	84	4	-0.43166	0.2075	0.42508	0.963049	285	4	-0.43166
FBgn0029858	10	0.18874	0.39712	0.986454	244	4	-0.14197	0.20772	0.4254	0.963049	286	2	-0.14197
FBgn0028563	10	0.99159	0.99211	0.995161	637	0	-0.12538	0.21055	0.42967	0.963781	287	4	-0.12538
FBgn0016984	10	0.27265	0.50236	0.986454	309	2	0.032682	0.21189	0.43153	0.963781	288	2	0.032682
FBgn0032642	10	0.24469	0.4758	0.986454	292	3	-0.23085	0.21372	0.43406	0.963781	289	2	-0.23085
FBgn0263235	10	0.075449	0.21428	0.986454	136	3	-0.31017	0.21427	0.43481	0.963781	290	3	-0.31017
FBgn0032223	10	0.053144	0.16254	0.929116	113	2	0.0058297	0.21607	0.43722	0.963781	291	2	0.0058297
FBgn0260779	10	0.3134	0.53921	0.986454	337	3	-0.40096	0.21689	0.4385	0.963781	292	1	-0.40096
FBgn0034179	8	0.23497	0.42419	0.986454	285	3	-0.036565	0.21742	0.4067	0.963049	293	3	-0.036565
FBgn0031897	10	0.054548	0.16645	0.935567	116	5	-0.34632	0.22131	0.44431	0.963781	294	2	-0.34632
FBgn0024846	10	0.58915	0.75582	0.99134	492	2	-0.21282	0.22182	0.44502	0.963781	295	4	-0.21282
FBgn0037625	10	0.18398	0.39018	0.986454	236	3	0.036268	0.22375	0.44774	0.963781	296	3	0.036268
FBgn0000229	10	0.22221	0.44473	0.986454	278	3	-0.14734	0.22385	0.44791	0.963781	297	3	-0.14734
FBgn0039941	10	0.42544	0.63987	0.986454	413	3	0.024647	0.2244	0.44866	0.963781	298	4	0.024647
FBgn0033980	10	0.51475	0.71726	0.986454	463	2	-0.079022	0.22551	0.45	0.963781	299	4	-0.079022
FBgn0039188	10	0.19703	0.40863	0.986454	250	3	-0.59761	0.22661	0.45158	0.963781	300	3	-0.59761
FBgn0035082	10	0.90731	0.91939	0.994099	601	1	0.10676	0.22662	0.45158	0.963781	301	4	0.10676
FBgn0036428	10	0.40895	0.62572	0.986454	405	2	-0.41618	0.22821	0.4538	0.963781	302	2	-0.41618
FBgn0003371	10	0.10754	0.27551	0.986454	173	3	-0.21661	0.22821	0.4538	0.963781	303	1	-0.21661
FBgn0010269	10	0.37047	0.59048	0.986454	380	3	-0.27857	0.23258	0.45976	0.971781	304	2	-0.27857
FBgn0264959	10	0.27744	0.50665	0.986454	312	3	-0.29398	0.23379	0.46142	0.971781	305	2	-0.29398
FBgn0034687	10	0.0012335	0.0068425	0.555914	7	4	-0.077138	0.23708	0.46574	0.971781	306	4	-0.077138
FBgn0030844	10	0.81872	0.88363	0.993145	573	1	0.11033	0.23754	0.46636	0.971781	307	3	0.11033
FBgn0035703	10	0.019557	0.075495	0.889289	51	3	-0.11614	0.23885	0.46811	0.971781	308	4	-0.11614
FBgn0020224	9	0.26278	0.46821	0.986454	303	3	-0.082862	0.24178	0.45227	0.963781	309	3	-0.082862
FBgn0035425	10	0.62932	0.77761	0.992179	506	1	0.050564	0.24424	0.47562	0.971781	310	4	0.050564
FBgn0026090	10	0.77371	0.86905	0.993145	559	2	-0.0037951	0.24484	0.4764	0.971781	311	4	-0.0037951
FBgn0270928	10	0.48799	0.69614	0.986454	446	3	-0.032785	0.24493	0.47648	0.971781	312	3	-0.032785
FBgn0085459	10	0.37152	0.59152	0.986454	382	1	-0.6689	0.24591	0.47796	0.971781	313	3	-0.6689
FBgn0032820	10	0.69744	0.81811	0.993145	534	2	-1.0409	0.24926	0.48232	0.971781	314	2	-1.0409
FBgn0038247	10	0.27247	0.50213	0.986454	308	2	0.040061	0.24962	0.48274	0.971781	315	4	0.040061
FBgn0039622	10	0.18654	0.39398	0.986454	240	3	-0.077526	0.24966	0.48278	0.971781	316	3	-0.077526
FBgn0015765	10	0.77278	0.86841	0.993145	558	1	0.20496	0.24982	0.483	0.971781	317	3	0.20496
FBgn0030449	10	0.30403	0.53086	0.986454	328	2	-0.52142	0.24987	0.48306	0.971781	318	2	-0.52142
FBgn0000489	10	0.40251	0.6199	0.986454	401	3	-0.69185	0.25103	0.48468	0.971781	319	2	-0.69185
FBgn0039734	10	0.14505	0.33289	0.986454	198	2	0.066938	0.25116	0.48483	0.971781	320	4	0.066938
FBgn0036282	8	0.32927	0.53188	0.986454	349	1	-1.0409	0.2522	0.44672	0.963781	321	2	-1.0409
FBgn0039241	10	0.95623	0.95677	0.995161	617	0	-0.010404	0.25231	0.48627	0.971781	322	4	-0.010404
FBgn0030789	8	0.41384	0.59676	0.986454	408	2	-0.74913	0.2534	0.44782	0.963781	323	3	-0.74913
FBgn0037140	10	0.48375	0.69221	0.986454	444	3	-0.16784	0.25443	0.4891	0.971781	324	4	-0.16784
FBgn0033115	10	0.019205	0.074218	0.889289	50	4	-0.23018	0.25535	0.49007	0.971781	325	2	-0.23018
FBgn0039098	10	0.4927	0.70027	0.986454	453	3	-0.12259	0.25649	0.49165	0.971781	326	3	-0.12259
FBgn0053121	9	0.66372	0.78375	0.99274	517	2	-0.15926	0.2568	0.46754	0.971781	327	2	-0.15926
FBgn0265784	10	0.11742	0.29018	0.986454	185	4	-0.19697	0.2571	0.49241	0.971781	328	1	-0.19697
FBgn0015586	10	0.30517	0.53181	0.986454	329	3	-0.1735	0.2583	0.49411	0.971781	329	2	-0.1735
FBgn0036970	10	0.086749	0.23929	0.986454	149	5	-0.40775	0.26011	0.49617	0.971781	330	1	-0.40775
FBgn0085384	10	0.053058	0.16233	0.929116	112	3	-1.027	0.26023	0.49632	0.971781	331	2	-1.027
FBgn0038466	10	0.99159	0.99211	0.995161	640	0	-0.032256	0.26239	0.49899	0.972817	332	4	-0.032256
FBgn0036962	10	0.15045	0.34108	0.986454	202	4	-0.45808	0.26298	0.49984	0.972817	333	2	-0.45808
FBgn0039064	10	0.36105	0.58212	0.986454	373	2	-0.12792	0.26451	0.50177	0.97338	334	2	-0.12792
FBgn0039924	10	0.79578	0.87704	0.993145	567	1	-0.36586	0.26551	0.50311	0.97338	335	2	-0.36586
FBgn0030460	2	0.84644	0.84665	0.993145	579	0	0.62666	0.26909	0.28545	0.963049	336	1	0.62666
FBgn0031561	9	0.26764	0.47334	0.986454	306	2	-0.59595	0.26997	0.48092	0.971781	337	3	-0.59595
FBgn0039797	10	0.080892	0.2267	0.986454	141	3	-0.44265	0.27265	0.5096	0.977849	338	2	-0.44265
FBgn0031681	10	0.47761	0.68665	0.986454	436	3	-0.38503	0.2762	0.51265	0.977849	339	3	-0.38503
FBgn0040068	10	0.29831	0.52583	0.986454	324	1	-0.79392	0.28014	0.51588	0.977849	340	2	-0.79392
FBgn0267912	10	0.39635	0.61459	0.986454	395	3	-0.52976	0.28014	0.51588	0.977849	341	3	-0.52976
FBgn0039747	10	0.32595	0.55073	0.986454	345	2	0.084466	0.28046	0.5162	0.977849	342	3	0.084466
FBgn0027794	10	0.58867	0.75561	0.99134	491	1	-0.016854	0.28208	0.51742	0.977849	343	2	-0.016854
FBgn0038331	10	0.48869	0.69683	0.986454	447	2	-0.83554	0.28908	0.52379	0.979982	344	2	-0.83554
FBgn0030559	10	0.74578	0.84978	0.993145	548	2	-0.16759	0.29121	0.52573	0.979982	345	3	-0.16759
FBgn0035823	10	0.28733	0.51549	0.986454	319	3	-0.34787	0.29198	0.52637	0.979982	346	2	-0.34787
FBgn0033315	10	0.99159	0.99211	0.995161	636	0	0.10134	0.29826	0.53209	0.979982	347	3	0.10134
FBgn0263600	10	0.66425	0.79783	0.993145	518	1	-0.09255	0.29888	0.53259	0.979982	348	2	-0.09255
FBgn0019940	10	0.081253	0.22759	0.986454	142	5	-0.27405	0.3046	0.53759	0.979982	349	1	-0.27405
FBgn0283649	10	0.24982	0.48244	0.986454	297	2	-0.11749	0.3075	0.53991	0.979982	350	3	-0.11749
FBgn0001108	10	0.32316	0.54818	0.986454	342	1	-1.0409	0.30811	0.54043	0.979982	351	3	-1.0409
FBgn0004463	10	0.18131	0.38623	0.986454	234	2	-0.4709	0.31027	0.54251	0.979982	352	2	-0.4709
FBgn0002940	10	0.28908	0.51717	0.986454	320	3	-0.56956	0.31119	0.54318	0.979982	353	2	-0.56956
FBgn0016794	9	0.2256	0.42976	0.986454	281	3	-1.0409	0.31353	0.52496	0.979982	354	3	-1.0409
FBgn0037828	10	0.19812	0.41011	0.986454	251	4	-0.40774	0.3187	0.54991	0.979982	355	1	-0.40774
FBgn0041184	10	0.0083296	0.036844	0.800312	30	5	-0.51662	0.32864	0.55858	0.979982	356	3	-0.51662
FBgn0260935	10	0.45811	0.66899	0.986454	427	3	-0.83407	0.32871	0.55864	0.979982	357	2	-0.83407
FBgn0052383	10	0.3695	0.58962	0.986454	379	3	-0.94197	0.33025	0.55985	0.979982	358	2	-0.94197
FBgn0038279	10	0.80934	0.88074	0.993145	569	1	-0.041474	0.33086	0.56036	0.979982	359	3	-0.041474
FBgn0040871	10	0.31309	0.53891	0.986454	335	2	-0.16759	0.33309	0.56236	0.979982	360	2	-0.16759
FBgn0266347	9	0.44527	0.64711	0.986454	422	2	-0.28765	0.33376	0.54524	0.979982	361	2	-0.28765
FBgn0050046	10	0.10595	0.27312	0.986454	171	4	0.12836	0.33438	0.56367	0.979982	362	3	0.12836
FBgn0024698	9	0.40176	0.61078	0.986454	399	2	-0.030075	0.33673	0.54815	0.979982	363	1	-0.030075
FBgn0002773	10	0.3922	0.61093	0.986454	393	3	-0.068009	0.33746	0.5664	0.979982	364	3	-0.068009
FBgn0024248	8	0.063888	0.17264	0.935663	127	4	-0.28974	0.33894	0.5434	0.979982	365	2	-0.28974
FBgn0263656	10	0.021228	0.081125	0.889289	56	6	-0.25088	0.33966	0.56828	0.979982	366	3	-0.25088
FBgn0051992	10	0.079814	0.22434	0.986454	139	4	-0.15369	0.34072	0.56917	0.979982	367	2	-0.15369
FBgn0033685	10	0.35935	0.58074	0.986454	372	2	-0.049525	0.34446	0.57222	0.979982	368	3	-0.049525
FBgn0012058	10	0.35293	0.57517	0.986454	370	2	-0.74397	0.34494	0.57272	0.979982	369	3	-0.74397
FBgn0030992	10	0.045603	0.14495	0.919053	101	1	-0.081488	0.34505	0.57285	0.979982	370	1	-0.081488
FBgn0052633	10	0.22025	0.44186	0.986454	274	4	-0.37176	0.3472	0.57486	0.979982	371	2	-0.37176
FBgn0035709	10	0.47808	0.68707	0.986454	439	3	-0.15577	0.34834	0.57582	0.979982	372	3	-0.15577
FBgn0036271	10	0.67779	0.80599	0.993145	522	2	-0.0027576	0.34834	0.57582	0.979982	373	2	-0.0027576
FBgn0264895	8	0.0082129	0.033154	0.800312	26	5	-0.34429	0.34861	0.55388	0.979982	374	2	-0.34429
FBgn0015296	10	0.16696	0.36609	0.986454	219	4	-0.15815	0.35149	0.57858	0.979982	375	2	-0.15815
FBgn0039710	10	0.39966	0.61742	0.986454	397	2	-0.25611	0.35215	0.57921	0.979982	376	3	-0.25611
FBgn0283442	10	0.81736	0.88324	0.993145	572	1	-0.35266	0.35354	0.58036	0.979982	377	2	-0.35266
FBgn0266411	10	0.38397	0.60303	0.986454	388	3	-0.17075	0.35682	0.58299	0.979982	378	3	-0.17075
FBgn0023213	10	0.23878	0.46747	0.986454	291	1	-0.61696	0.36514	0.59008	0.979982	379	3	-0.61696
FBgn0033020	5	0.90829	0.90786	0.994099	602	0	-0.095835	0.36636	0.50866	0.977849	380	1	-0.095835
FBgn0267435	10	0.51194	0.71576	0.986454	462	1	0.17724	0.37032	0.59441	0.979982	381	3	0.17724
FBgn0040391	10	0.21489	0.43462	0.986454	265	4	-0.18137	0.37032	0.59441	0.979982	382	2	-0.18137
FBgn0259977	10	0.0725	0.20753	0.986454	134	4	-0.69197	0.37463	0.59834	0.979982	383	2	-0.69197
FBgn0036451	10	0.68909	0.81288	0.993145	528	1	0.02186	0.37698	0.60055	0.979982	384	3	0.02186
FBgn0041627	10	0.2523	0.48462	0.986454	299	2	-0.074581	0.37978	0.60294	0.979982	385	2	-0.074581
FBgn0051852	10	0.0070807	0.032303	0.800312	23	3	-1.0409	0.38081	0.60393	0.979982	386	2	-1.0409
FBgn0033266	10	0.085938	0.23755	0.986454	148	4	-0.31109	0.38109	0.60415	0.979982	387	3	-0.31109
FBgn0032042	10	0.2018	0.41552	0.986454	253	3	-0.54742	0.38286	0.60565	0.979982	388	1	-0.54742
FBgn0011826	10	0.0014125	0.0076737	0.555914	9	5	-0.73956	0.38388	0.60664	0.979982	389	2	-0.73956
FBgn0025781	10	0.5915	0.75719	0.99134	494	2	-0.093522	0.38496	0.60768	0.979982	390	3	-0.093522
FBgn0042710	10	0.11376	0.28501	0.986454	180	4	-0.15338	0.38713	0.60977	0.979982	391	3	-0.15338
FBgn0040234	10	0.0082618	0.036647	0.800312	27	6	-0.34725	0.39062	0.61281	0.979982	392	2	-0.34725
FBgn0261854	8	0.030619	0.099857	0.889289	78	5	-0.1859	0.39071	0.58926	0.979982	393	2	-0.1859
FBgn0036876	10	0.18596	0.3931	0.986454	239	3	-0.081351	0.39317	0.61505	0.979982	394	3	-0.081351
FBgn0250819	10	0.26431	0.49515	0.986454	304	1	-0.17846	0.39462	0.61623	0.979982	395	3	-0.17846
FBgn0264298	10	0.090738	0.24818	0.986454	155	5	-0.23635	0.39752	0.61899	0.979982	396	3	-0.23635
FBgn0034187	10	0.75766	0.85738	0.993145	552	2	-0.33418	0.39952	0.62058	0.979982	397	2	-0.33418
FBgn0037592	10	0.73444	0.84187	0.993145	542	2	-0.070831	0.4035	0.62395	0.979982	398	2	-0.070831
FBgn0002774	10	0.18771	0.39557	0.986454	243	2	-0.62445	0.40696	0.62695	0.979982	399	3	-0.62445
FBgn0039277	10	0.0022341	0.011899	0.716377	10	2	-0.51044	0.40991	0.62957	0.979982	400	2	-0.51044
FBgn0001974	5	0.77438	0.7746	0.992179	560	1	-0.23262	0.41158	0.55203	0.979982	401	1	-0.23262
FBgn0086359	10	0.49938	0.70665	0.986454	460	2	-0.21659	0.41224	0.63139	0.979982	402	2	-0.21659
FBgn0032763	10	0.19184	0.40161	0.986454	247	4	-0.037343	0.41538	0.63412	0.979982	403	3	-0.037343
FBgn0025807	10	0.62182	0.77339	0.992179	503	1	-1.0409	0.41675	0.63508	0.979982	404	3	-1.0409
FBgn0031042	10	0.18529	0.39203	0.986454	237	3	0.031051	0.41772	0.636	0.979982	405	3	0.031051
FBgn0039782	10	0.35215	0.57457	0.986454	368	3	-0.45925	0.41869	0.63673	0.979982	406	2	-0.45925
FBgn0260972	10	0.40694	0.62387	0.986454	403	3	-1.0409	0.41966	0.63752	0.979982	407	2	-1.0409
FBgn0031183	10	0.37214	0.59216	0.986454	383	2	-0.060155	0.42058	0.63832	0.979982	408	3	-0.060155
FBgn0029840	10	0.095834	0.25659	0.986454	161	3	-0.21552	0.42062	0.63836	0.979982	409	1	-0.21552
FBgn0011300	10	0.72968	0.83872	0.993145	540	2	0.0073775	0.42069	0.63841	0.979982	410	3	0.0073775
FBgn0004864	10	0.4563	0.66749	0.986454	426	2	-1.0143	0.42159	0.63925	0.979982	411	2	-1.0143
FBgn0032650	10	0.42159	0.63659	0.986454	412	1	-0.55962	0.42544	0.64245	0.979982	412	1	-0.55962
FBgn0264075	9	0.27946	0.48597	0.986454	314	3	-0.60729	0.42822	0.63764	0.979982	413	2	-0.60729
FBgn0038721	10	0.2341	0.46123	0.986454	284	2	-0.95431	0.42829	0.64495	0.979982	414	3	-0.95431
FBgn0039584	10	0.22383	0.44703	0.986454	280	2	-0.090081	0.42911	0.64558	0.979982	415	3	-0.090081
FBgn0024996	10	0.79578	0.87704	0.993145	566	1	-0.106	0.42947	0.64593	0.979982	416	3	-0.106
FBgn0031040	10	0.25407	0.48625	0.986454	300	1	-0.63864	0.43116	0.64744	0.979982	417	2	-0.63864
FBgn0015828	10	0.95027	0.95075	0.995161	615	1	0.082719	0.4342	0.65015	0.979982	418	2	0.082719
FBgn0263076	10	0.014895	0.059435	0.86129	42	3	-0.18182	0.43479	0.65068	0.979982	419	2	-0.18182
FBgn0039938	10	0.037375	0.12423	0.899964	90	5	-0.74485	0.43743	0.65285	0.979982	420	2	-0.74485
FBgn0031830	10	0.33964	0.56321	0.986454	358	2	-0.30861	0.43777	0.65318	0.979982	421	3	-0.30861
FBgn0031126	10	0.1746	0.37681	0.986454	225	3	-0.3809	0.4428	0.65755	0.979982	422	3	-0.3809
FBgn0037504	10	0.057226	0.1728	0.935663	117	4	-0.6292	0.44376	0.65834	0.979982	423	3	-0.6292
FBgn0259189	10	0.15419	0.34692	0.986454	204	4	-0.35984	0.4519	0.66523	0.979982	424	3	-0.35984
FBgn0050438	10	0.68409	0.8099	0.993145	525	1	-0.65215	0.45382	0.66689	0.979982	425	3	-0.65215
FBgn0038017	10	0.3375	0.56135	0.986454	356	3	-0.31994	0.45764	0.67016	0.979982	426	3	-0.31994
FBgn0014366	10	0.027887	0.10002	0.889289	71	4	-0.12329	0.4605	0.67278	0.979982	427	3	-0.12329
FBgn0038448	10	0.32869	0.55317	0.986454	348	3	-0.07294	0.4605	0.67278	0.979982	428	3	-0.07294
FBgn0033086	10	0.038451	0.12705	0.900763	91	4	-0.41645	0.46084	0.67301	0.979982	429	2	-0.41645
FBgn0265267	10	0.95132	0.95195	0.995161	616	0	-0.11445	0.46175	0.67377	0.979982	430	3	-0.11445
FBgn0003140	10	0.94633	0.94717	0.995161	613	1	-0.0084376	0.46337	0.67505	0.979982	431	2	-0.0084376
FBgn0030623	10	0.20832	0.42498	0.986454	258	2	-0.15215	0.46453	0.67606	0.979982	432	2	-0.15215
FBgn0030305	10	0.15983	0.35534	0.986454	210	3	0.014154	0.46455	0.67609	0.979982	433	3	0.014154
FBgn0020412	10	0.075421	0.21426	0.986454	135	4	-0.13403	0.47049	0.68127	0.979982	434	3	-0.13403
FBgn0041164	10	0.0077339	0.034786	0.800312	24	6	-0.27002	0.47161	0.6822	0.979982	435	2	-0.27002
FBgn0010340	10	0.11806	0.29132	0.986454	186	3	-0.1489	0.47832	0.68839	0.979982	436	3	-0.1489
FBgn0000326	10	0.32427	0.54927	0.986454	343	2	-0.088883	0.48	0.68967	0.979982	437	2	-0.088883
FBgn0270924	10	0.3063	0.53276	0.986454	331	3	-0.40184	0.48131	0.69085	0.979982	438	1	-0.40184
FBgn0000038	10	0.85872	0.89722	0.994099	585	1	0.10562	0.48281	0.69226	0.979982	439	3	0.10562
FBgn0015295	10	0.25474	0.48689	0.986454	301	3	-0.27756	0.48305	0.69249	0.979982	440	1	-0.27756
FBgn0036671	10	0.65437	0.79226	0.993145	513	2	-0.36189	0.48422	0.69349	0.979982	441	3	-0.36189
FBgn0017572	10	0.21707	0.43778	0.986454	270	4	-0.17773	0.48705	0.69599	0.979982	442	3	-0.17773
FBgn0032717	10	0.47604	0.68499	0.986454	434	3	-0.58235	0.48739	0.69623	0.979982	443	2	-0.58235
FBgn0035574	8	0.58382	0.7198	0.986454	489	2	-0.13053	0.48798	0.65348	0.979982	444	1	-0.13053
FBgn0004895	10	0.010424	0.044573	0.854744	34	6	-0.21361	0.48799	0.69684	0.979982	445	3	-0.21361
FBgn0014135	10	0.36516	0.58586	0.986454	375	3	-0.016359	0.48826	0.69706	0.979982	446	2	-0.016359
FBgn0039153	10	0.049172	0.15293	0.922965	107	5	-0.59037	0.48851	0.69728	0.979982	447	2	-0.59037
FBgn0032187	10	0.46455	0.67463	0.986454	429	3	-0.32108	0.49041	0.69897	0.979982	448	1	-0.32108
FBgn0028902	10	0.70847	0.82507	0.993145	537	2	-0.20904	0.4927	0.7009	0.979982	449	3	-0.20904
FBgn0260648	10	0.65315	0.79167	0.993145	512	1	-0.049678	0.49458	0.70251	0.979982	450	3	-0.049678
FBgn0029979	10	0.88699	0.90915	0.994099	592	1	-0.074989	0.4988	0.7067	0.979982	451	3	-0.074989
FBgn0031869	10	0.70525	0.82308	0.993145	536	1	-0.071354	0.50022	0.70804	0.979982	452	2	-0.071354
FBgn0030505	10	0.10912	0.27794	0.986454	175	3	-0.014171	0.50114	0.70901	0.979982	453	3	-0.014171
FBgn0266064	10	0.47772	0.68671	0.986454	437	2	-0.43112	0.50347	0.71105	0.979982	454	3	-0.43112
FBgn0000384	10	0.14161	0.32791	0.986454	197	4	-0.52698	0.5036	0.71118	0.979982	455	2	-0.52698
FBgn0011754	10	0.91447	0.92339	0.995161	603	1	-0.83407	0.50487	0.71231	0.979982	456	3	-0.83407
FBgn0039270	10	0.30073	0.52798	0.986454	327	3	-0.33334	0.50645	0.7137	0.979982	457	2	-0.33334
FBgn0030855	10	0.040961	0.13311	0.905343	95	5	-0.14417	0.50778	0.71487	0.979982	458	1	-0.14417
FBgn0266084	10	0.0886	0.24324	0.986454	152	3	0.037323	0.50907	0.71586	0.979982	459	3	0.037323
FBgn0016081	10	0.2679	0.49817	0.986454	307	2	-0.28188	0.51028	0.7168	0.979982	460	2	-0.28188
FBgn0031006	2	0.88196	0.88292	0.993145	590	0	0.099844	0.51133	0.51105	0.977849	461	0	0.099844
FBgn0262870	10	0.75691	0.85693	0.993145	551	1	-0.041241	0.514	0.72017	0.979982	462	2	-0.041241
FBgn0035627	10	0.090051	0.24656	0.986454	154	3	-0.68499	0.51789	0.72379	0.979982	463	3	-0.68499
FBgn0035483	10	0.11417	0.28565	0.986454	181	4	-0.31069	0.51933	0.72525	0.979982	464	2	-0.31069
FBgn0052568	10	0.32459	0.54965	0.986454	344	3	-0.63474	0.51933	0.72525	0.979982	465	1	-0.63474
FBgn0053116	7	0.17609	0.33788	0.986454	228	2	-1.0409	0.51994	0.66195	0.979982	466	1	-1.0409
FBgn0032499	10	0.041052	0.1333	0.905343	96	2	-0.19861	0.52066	0.72638	0.979982	467	3	-0.19861
FBgn0037081	10	0.00078899	0.0046458	0.555914	5	4	-0.47808	0.52134	0.72702	0.979982	468	2	-0.47808
FBgn0015008	10	0.392	0.61073	0.986454	392	2	-0.71721	0.52243	0.72806	0.979982	469	2	-0.71721
FBgn0036717	10	0.67388	0.80358	0.993145	521	2	0.032985	0.5234	0.72884	0.979982	470	2	0.032985
FBgn0033397	10	0.053058	0.16233	0.929116	111	4	-0.7812	0.52544	0.73078	0.979982	471	2	-0.7812
FBgn0039209	10	0.00024701	0.0017465	0.463441	2	5	-0.25653	0.52744	0.732	0.979982	472	1	-0.25653
FBgn0029117	10	0.17855	0.38235	0.986454	231	4	-0.67256	0.52904	0.73269	0.979982	473	1	-0.67256
FBgn0029114	10	0.03219	0.11083	0.897734	80	5	-0.44583	0.53224	0.73411	0.979982	474	2	-0.44583
FBgn0036480	7	0.96473	0.96519	0.995161	618	0	-0.10546	0.53275	0.67257	0.979982	475	1	-0.10546
FBgn0035336	10	0.013279	0.05428	0.86129	37	5	-0.41886	0.53384	0.73488	0.979982	476	2	-0.41886
FBgn0034491	10	0.14594	0.33416	0.986454	199	4	-0.36706	0.5366	0.7362	0.979982	477	1	-0.36706
FBgn0039015	10	0.91516	0.92373	0.995161	604	1	-0.11148	0.54137	0.73847	0.979982	478	2	-0.11148
FBgn0262739	7	0.23501	0.4181	0.986454	286	2	-0.15717	0.54686	0.68433	0.979982	479	2	-0.15717
FBgn0027492	10	0.38388	0.60297	0.986454	387	1	-1.0409	0.54947	0.74205	0.979982	480	1	-1.0409
FBgn0083961	10	0.092919	0.25182	0.986454	158	4	-0.46908	0.55095	0.74269	0.979982	481	2	-0.46908
FBgn0038541	10	0.57236	0.74687	0.98976	483	2	-0.37061	0.55407	0.74414	0.979982	482	2	-0.37061
FBgn0020440	10	0.4712	0.68058	0.986454	432	3	-0.64235	0.55937	0.74694	0.979982	483	2	-0.64235
FBgn0050094	10	0.63763	0.78275	0.99274	507	2	-0.80635	0.56089	0.74767	0.979982	484	2	-0.80635
FBgn0031420	10	0.19868	0.41089	0.986454	252	3	-0.2982	0.56464	0.74961	0.979982	485	2	-0.2982
FBgn0014011	10	0.17471	0.37695	0.986454	226	4	-0.37531	0.56613	0.75048	0.979982	486	2	-0.37531
FBgn0038921	10	0.15459	0.34756	0.986454	205	3	-0.16485	0.56693	0.75098	0.979982	487	2	-0.16485
FBgn0038715	10	0.56014	0.73993	0.98976	477	2	-0.29059	0.57352	0.75443	0.979982	488	1	-0.29059
FBgn0029893	10	0.27535	0.5048	0.986454	310	3	-1.0409	0.57425	0.75478	0.979982	489	2	-1.0409
FBgn0020621	10	0.20768	0.424	0.986454	257	4	-0.047568	0.57608	0.75567	0.979982	490	2	-0.047568
FBgn0030679	10	0.3118	0.53763	0.986454	334	3	-1.034	0.58582	0.76068	0.979982	491	1	-1.034
FBgn0038524	10	0.18736	0.39516	0.986454	242	4	-0.32604	0.58613	0.76087	0.979982	492	2	-0.32604
FBgn0038890	10	0.69203	0.81468	0.993145	532	2	-0.17391	0.59267	0.7641	0.979982	493	2	-0.17391
FBgn0037492	10	0.75779	0.85745	0.993145	553	1	0.0070736	0.59591	0.76578	0.979982	494	2	0.0070736
FBgn0029672	8	0.00302	0.013403	0.716377	13	6	-0.30571	0.59769	0.73274	0.979982	495	1	-0.30571
FBgn0037889	10	0.068065	0.19823	0.986454	131	3	-0.11276	0.60556	0.77054	0.979982	496	2	-0.11276
FBgn0001217	10	0.92359	0.92899	0.995161	607	1	-0.033683	0.60675	0.77087	0.979982	497	1	-0.033683
FBgn0030530	8	0.97813	0.97762	0.995161	621	0	-0.10355	0.61122	0.74299	0.979982	498	2	-0.10355
FBgn0261832	10	0.83499	0.8887	0.993145	576	1	-0.35098	0.61191	0.77357	0.979982	499	2	-0.35098
FBgn0013672	10	0.68273	0.80901	0.993145	524	2	-0.53143	0.6125	0.77385	0.979982	500	2	-0.53143
FBgn0003134	10	0.32204	0.54727	0.986454	341	2	-1.0409	0.61361	0.77448	0.979982	501	2	-1.0409
FBgn0037248	10	0.99159	0.99211	0.995161	643	0	-1.0409	0.61579	0.77575	0.979982	502	2	-1.0409
FBgn0053554	10	0.43401	0.64763	0.986454	417	2	-0.68038	0.61964	0.77768	0.979982	503	2	-0.68038
FBgn0263987	5	0.021631	0.063967	0.86129	57	3	-0.69195	0.61996	0.65879	0.979982	504	1	-0.69195
FBgn0028530	10	0.536	0.72788	0.988851	471	2	-0.25292	0.62252	0.77915	0.979982	505	2	-0.25292
FBgn0041789	10	0.99159	0.99211	0.995161	639	0	-0.10496	0.62411	0.77988	0.979982	506	2	-0.10496
FBgn0029648	10	0.35071	0.57326	0.986454	366	3	-0.44994	0.62609	0.78104	0.979982	507	2	-0.44994
FBgn0033500	10	0.81478	0.88237	0.993145	570	1	-0.18562	0.62728	0.78169	0.979982	508	2	-0.18562
FBgn0027620	10	0.38183	0.60103	0.986454	386	3	-0.088685	0.6287	0.78252	0.979982	509	2	-0.088685
FBgn0033473	10	0.33103	0.55515	0.986454	351	3	-0.30341	0.63509	0.7864	0.979982	510	2	-0.30341
FBgn0032934	10	0.12566	0.30352	0.986454	194	3	-0.19512	0.63669	0.78714	0.979982	511	2	-0.19512
FBgn0030686	10	0.10752	0.2755	0.986454	172	4	-0.38945	0.64391	0.79111	0.979982	512	1	-0.38945
FBgn0003892	10	0.12286	0.29898	0.986454	192	4	-0.33209	0.64411	0.79127	0.979982	513	2	-0.33209
FBgn0014859	10	0.014569	0.058426	0.86129	40	5	-0.60224	0.64702	0.79291	0.979982	514	1	-0.60224
FBgn0031195	10	0.027927	0.10011	0.889289	72	3	-0.26069	0.64709	0.79295	0.979982	515	2	-0.26069
FBgn0029722	10	0.16807	0.36772	0.986454	221	2	-0.89368	0.64825	0.7935	0.979982	516	2	-0.89368
FBgn0033935	10	0.077897	0.22012	0.986454	137	5	-0.73911	0.6504	0.7947	0.979982	517	1	-0.73911
FBgn0031461	10	0.0060393	0.028641	0.800312	16	6	-0.54517	0.65739	0.79851	0.979982	518	1	-0.54517
FBgn0038598	10	0.2762	0.5056	0.986454	311	3	-0.35376	0.65919	0.79933	0.979982	519	2	-0.35376
FBgn0039726	10	0.03042	0.10624	0.889289	76	4	-0.49869	0.65955	0.79954	0.979982	520	2	-0.49869
FBgn0020299	10	0.0063824	0.029898	0.800312	18	6	-0.62467	0.66098	0.80031	0.979982	521	1	-0.62467
FBgn0034996	10	0.16539	0.36384	0.986454	218	2	-0.88676	0.66217	0.80093	0.979982	522	1	-0.88676
FBgn0051902	10	0.22085	0.44271	0.986454	275	2	-0.55634	0.66223	0.80094	0.979982	523	2	-0.55634
FBgn0046689	10	0.046772	0.14773	0.919053	103	4	-0.59927	0.66223	0.80094	0.979982	524	2	-0.59927
FBgn0261560	10	0.022004	0.083856	0.889289	58	5	-0.7336	0.66513	0.80257	0.979982	525	2	-0.7336
FBgn0037538	10	0.24582	0.47749	0.986454	293	3	-0.3803	0.67388	0.80753	0.979982	526	2	-0.3803
FBgn0000259	9	0.61563	0.75085	0.990995	501	2	0.0089447	0.67543	0.79456	0.979982	527	2	0.0089447
FBgn0039623	10	0.12461	0.30178	0.986454	193	3	-0.26385	0.6756	0.80848	0.979982	528	1	-0.26385
FBgn0001089	10	0.011531	0.048273	0.86129	35	6	-0.35451	0.67617	0.8088	0.979982	529	1	-0.35451
FBgn0033889	10	0.082201	0.22962	0.986454	144	5	-0.45346	0.68144	0.81177	0.979982	530	2	-0.45346
FBgn0011474	10	0.9012	0.91614	0.994099	599	1	0.1771	0.68297	0.81275	0.979982	531	2	0.1771
FBgn0010379	10	0.4274	0.64167	0.986454	415	2	-0.20385	0.68613	0.81474	0.979982	532	2	-0.20385
FBgn0036206	10	0.025743	0.094691	0.889289	67	3	-0.87026	0.68656	0.81501	0.979982	533	2	-0.87026
FBgn0039043	10	0.025375	0.093702	0.889289	65	5	-0.60095	0.69308	0.81873	0.979982	534	2	-0.60095
FBgn0033677	6	0.74476	0.76109	0.991391	546	1	-0.25867	0.69324	0.73396	0.979982	535	1	-0.25867
FBgn0250823	10	0.48021	0.68889	0.986454	441	3	-0.50526	0.70115	0.82369	0.979982	536	2	-0.50526
FBgn0033113	10	0.55445	0.7368	0.98976	476	2	-0.28879	0.70155	0.82396	0.979982	537	1	-0.28879
FBgn0026179	10	0.027283	0.098719	0.889289	70	2	-0.075439	0.70604	0.82643	0.979982	538	2	-0.075439
FBgn0037327	9	0.19239	0.39587	0.986454	248	3	-0.34233	0.70709	0.81634	0.979982	539	2	-0.34233
FBgn0025632	10	0.15515	0.34827	0.986454	207	3	-0.25241	0.70891	0.82805	0.979982	540	2	-0.25241
FBgn0037536	10	0.016452	0.064729	0.86129	47	3	-0.20998	0.71407	0.83149	0.979982	541	2	-0.20998
FBgn0046332	10	0.99159	0.99211	0.995161	650	0	-0.10194	0.71447	0.83173	0.979982	542	2	-0.10194
FBgn0036908	10	0.54947	0.73441	0.98933	475	2	-0.26235	0.71509	0.83212	0.979982	543	2	-0.26235
FBgn0028476	10	0.052236	0.16031	0.929116	110	4	-0.90914	0.71585	0.83263	0.979982	544	1	-0.90914
FBgn0038830	10	0.66	0.79544	0.993145	515	2	-0.34298	0.71646	0.83298	0.979982	545	2	-0.34298
FBgn0037074	10	0.1866	0.39407	0.986454	241	1	-0.38117	0.71882	0.83444	0.979982	546	2	-0.38117
FBgn0032235	10	0.20605	0.42167	0.986454	256	2	-0.2067	0.72265	0.83654	0.979982	547	1	-0.2067
FBgn0259146	10	0.033659	0.11477	0.897734	83	3	-0.50465	0.73148	0.84182	0.979982	548	1	-0.50465
FBgn0036096	10	0.44424	0.65679	0.986454	421	3	-0.45957	0.73196	0.8421	0.979982	549	2	-0.45957
FBgn0042627	10	0.76118	0.85989	0.993145	556	2	0.082654	0.73197	0.84212	0.979982	550	2	0.082654
FBgn0039305	10	0.21598	0.43607	0.986454	267	4	-0.11775	0.7346	0.84389	0.979982	551	1	-0.11775
FBgn0039650	10	0.026865	0.0976	0.889289	69	3	-0.57076	0.73931	0.84688	0.979982	552	2	-0.57076
FBgn0030716	10	0.3849	0.60405	0.986454	389	2	-0.8267	0.74146	0.84844	0.979982	553	1	-0.8267
FBgn0040098	10	0.99159	0.99211	0.995161	635	0	-1.0409	0.74761	0.85241	0.979982	554	2	-1.0409
FBgn0042712	10	0.0064285	0.030066	0.800312	19	4	-0.57936	0.75015	0.85404	0.979982	555	2	-0.57936
FBgn0004050	10	0.051585	0.15881	0.929116	109	5	-0.72807	0.7511	0.85472	0.979982	556	1	-0.72807
FBgn0040377	10	0.68213	0.80861	0.993145	523	1	-0.12435	0.75195	0.85511	0.979982	557	2	-0.12435
FBgn0021856	10	0.10957	0.2785	0.986454	176	3	-0.58525	0.75303	0.85565	0.979982	558	2	-0.58525
FBgn0039044	10	0.23009	0.45577	0.986454	282	3	-0.29515	0.75425	0.85646	0.979982	559	1	-0.29515
FBgn0034715	10	0.61434	0.76936	0.992179	500	2	-0.26261	0.75647	0.85773	0.979982	560	1	-0.26261
FBgn0050429	10	0.72351	0.83473	0.993145	538	2	-0.19584	0.75867	0.85916	0.979982	561	1	-0.19584
FBgn0024332	8	0.56722	0.70686	0.986454	479	2	-0.7734	0.75999	0.82282	0.979982	562	1	-0.7734
FBgn0042137	10	0.0055111	0.026583	0.800312	15	4	-0.40297	0.76083	0.86064	0.979982	563	2	-0.40297
FBgn0039115	10	0.19053	0.39984	0.986454	246	2	0.038023	0.76742	0.86534	0.979982	564	2	0.038023
FBgn0021742	10	0.030489	0.10639	0.889289	77	4	-0.34754	0.76845	0.86599	0.979982	565	2	-0.34754
FBgn0033192	10	0.34881	0.57151	0.986454	365	2	-0.87781	0.76922	0.86647	0.979982	566	1	-0.87781
FBgn0259168	10	0.019682	0.07599	0.889289	52	5	-0.63976	0.77084	0.86754	0.979982	567	2	-0.63976
FBgn0000289	10	0.41538	0.63127	0.986454	410	3	-0.76727	0.77174	0.8682	0.979982	568	1	-0.76727
FBgn0029067	10	0.10223	0.26689	0.986454	166	4	-0.41025	0.77174	0.8682	0.979982	569	1	-0.41025
FBgn0005198	3	0.88282	0.88284	0.993145	591	0	-0.029461	0.77563	0.77418	0.979982	570	0	-0.029461
FBgn0010316	7	2.5467e-05	0.00017316	0.112903	1	4	-0.75317	0.78099	0.80799	0.979982	571	1	-0.75317
FBgn0036187	10	0.73556	0.84264	0.993145	543	1	-0.35937	0.78136	0.87435	0.979982	572	1	-0.35937
FBgn0034142	6	0.47468	0.61695	0.986454	433	1	-0.79512	0.78283	0.79081	0.979982	573	1	-0.79512
FBgn0020660	8	0.15803	0.33289	0.986454	209	3	-0.57141	0.78585	0.83353	0.979982	574	1	-0.57141
FBgn0086384	9	0.0012924	0.0071393	0.555914	8	4	-0.99157	0.78605	0.85586	0.979982	575	1	-0.99157
FBgn0034650	10	0.0061526	0.029027	0.800312	17	5	-0.18912	0.78653	0.87807	0.979982	576	1	-0.18912
FBgn0041094	10	0.030158	0.10562	0.889289	75	5	-0.4842	0.79135	0.88134	0.979982	577	2	-0.4842
FBgn0086442	10	0.58309	0.75284	0.99134	488	2	-0.028784	0.79135	0.88134	0.979982	578	2	-0.028784
FBgn0026136	10	0.0026688	0.014284	0.716377	12	7	-0.41476	0.79389	0.88309	0.979982	579	1	-0.41476
FBgn0261524	9	0.017066	0.063809	0.86129	48	5	-0.47306	0.7942	0.85859	0.979982	580	1	-0.47306
FBgn0038952	10	0.18977	0.3987	0.986454	245	4	-0.24965	0.79446	0.88329	0.979982	581	1	-0.24965
FBgn0034858	10	0.03664	0.12248	0.899964	88	5	-0.60521	0.79767	0.88402	0.979982	582	1	-0.60521
FBgn0024811	10	0.11582	0.28797	0.986454	182	2	-1.0409	0.7999	0.88452	0.979982	583	1	-1.0409
FBgn0265089	10	0.029319	0.10356	0.889289	74	4	-0.49221	0.80322	0.88526	0.979982	584	1	-0.49221
FBgn0032691	8	0.87489	0.87936	0.993145	588	1	-1.0409	0.82259	0.85111	0.979982	585	1	-1.0409
FBgn0034317	10	0.064141	0.18904	0.962928	128	5	-1.0409	0.83248	0.89343	0.979982	586	1	-1.0409
FBgn0035604	10	0.92917	0.93284	0.995161	609	1	-0.10322	0.83716	0.89493	0.979982	587	1	-0.10322
FBgn0050156	10	0.20876	0.42578	0.986454	259	4	-0.33185	0.83839	0.89536	0.979982	588	1	-0.33185
FBgn0259228	10	0.15169	0.34328	0.986454	203	4	-0.37895	0.839	0.89558	0.979982	589	1	-0.37895
FBgn0034381	10	0.1762	0.37903	0.986454	229	4	-0.23214	0.83976	0.89581	0.979982	590	1	-0.23214
FBgn0262081	10	0.17738	0.38075	0.986454	230	3	-0.86459	0.84082	0.89613	0.979982	591	1	-0.86459
FBgn0035249	10	0.35456	0.57656	0.986454	371	3	-0.16167	0.84113	0.89625	0.979982	592	1	-0.16167
FBgn0003256	10	0.54014	0.73002	0.98933	473	2	-1.0409	0.8453	0.89773	0.979982	593	1	-1.0409
FBgn0010015	10	0.096954	0.25824	0.986454	163	4	-0.27676	0.84559	0.89782	0.979982	594	1	-0.27676
FBgn0024542	10	0.059742	0.17861	0.935663	123	4	-0.93016	0.85193	0.89995	0.979982	595	1	-0.93016
FBgn0025115	10	0.17929	0.3834	0.986454	232	3	-0.4425	0.85612	0.90124	0.979982	596	1	-0.4425
FBgn0034363	10	0.16185	0.35849	0.986454	213	3	-1.0409	0.85695	0.9016	0.979982	597	1	-1.0409
FBgn0031972	10	0.025113	0.093088	0.889289	64	5	-0.59179	0.85859	0.90211	0.979982	598	1	-0.59179
FBgn0005592	10	0.33855	0.5622	0.986454	357	1	-0.10123	0.86234	0.90324	0.979982	599	1	-0.10123
FBgn0030812	10	0.23506	0.46261	0.986454	287	3	-0.083556	0.86445	0.9039	0.979982	600	1	-0.083556
FBgn0033199	10	0.20348	0.41802	0.986454	254	3	-0.51394	0.86946	0.9059	0.979982	601	1	-0.51394
FBgn0003499	10	0.092947	0.25187	0.986454	159	4	-0.34909	0.87034	0.90628	0.979982	602	1	-0.34909
FBgn0033471	10	0.49035	0.6982	0.986454	450	3	-0.68956	0.87258	0.90714	0.979982	603	1	-0.68956
FBgn0030035	10	0.037375	0.12423	0.899964	89	5	-0.31744	0.87588	0.90836	0.979982	604	1	-0.31744
FBgn0010389	10	0.022019	0.083935	0.889289	59	4	-1.0298	0.88004	0.9102	0.979982	605	1	-1.0298
FBgn0086358	10	0.4919	0.69964	0.986454	451	2	-0.9714	0.88688	0.913	0.979982	606	1	-0.9714
FBgn0025549	10	0.07985	0.22442	0.986454	140	1	-0.13788	0.88754	0.91325	0.979982	607	1	-0.13788
FBgn0035533	10	0.26551	0.4961	0.986454	305	3	-1.0137	0.88886	0.91385	0.979982	608	1	-1.0137
FBgn0015039	10	0.059542	0.17821	0.935663	122	5	-0.43051	0.90031	0.91899	0.983397	609	1	-0.43051
FBgn0003483	10	0.9492	0.94958	0.995161	614	1	-0.088168	0.90459	0.92113	0.983397	610	1	-0.088168
FBgn0031194	10	0.66044	0.79569	0.993145	516	2	-0.4941	0.90675	0.92216	0.983397	611	1	-0.4941
FBgn0038332	10	0.13314	0.31551	0.986454	195	4	-0.17303	0.91033	0.92401	0.983397	612	1	-0.17303
FBgn0004507	10	0.0011645	0.0064566	0.555914	6	5	-0.40777	0.91123	0.92457	0.983397	613	1	-0.40777
FBgn0283472	10	0.00030552	0.0021324	0.463441	3	6	-0.76089	0.92089	0.92977	0.987312	614	1	-0.76089
FBgn0036274	10	0.087125	0.2401	0.986454	150	3	-0.84519	0.92544	0.93224	0.988329	615	1	-0.84519
FBgn0052333	10	0.16135	0.35774	0.986454	212	3	-0.25392	0.92975	0.93512	0.989773	616	1	-0.25392
FBgn0033733	10	0.44535	0.65793	0.986454	423	2	-0.49111	0.93512	0.93892	0.990083	617	1	-0.49111
FBgn0035887	10	0.50394	0.71111	0.986454	461	3	-0.13621	0.93626	0.93972	0.990083	618	1	-0.13621
FBgn0037657	10	0.94167	0.94314	0.995161	612	1	-0.80635	0.93652	0.93997	0.990083	619	1	-0.80635
FBgn0036398	10	0.36275	0.58357	0.986454	374	3	-0.5014	0.9421	0.94444	0.990441	620	1	-0.5014
FBgn0030507	10	0.019712	0.076069	0.889289	53	6	-0.47628	0.94354	0.94544	0.990441	621	1	-0.47628
FBgn0033272	10	0.0065682	0.030502	0.800312	20	4	-0.68342	0.94401	0.94585	0.990441	622	1	-0.68342
FBgn0034964	10	0.023661	0.089437	0.889289	61	6	-0.45099	0.94466	0.94642	0.990441	623	1	-0.45099
FBgn0263782	8	0.21467	0.39989	0.986454	264	2	-0.75298	0.94859	0.94791	0.990441	624	0	-0.75298
FBgn0264574	10	0.12093	0.2958	0.986454	189	2	-0.73014	0.94953	0.95024	0.991293	625	1	-0.73014
FBgn0030087	10	0.11299	0.28381	0.986454	179	3	-0.89204	0.95542	0.95587	0.993049	626	1	-0.89204
FBgn0036862	10	0.15592	0.34943	0.986454	208	4	-0.5501	0.95684	0.95741	0.993049	627	0	-0.5501
FBgn0267339	10	0.99159	0.99211	0.995161	646	0	-1.0409	0.95712	0.95764	0.993049	628	0	-1.0409
FBgn0262733	10	0.021107	0.08062	0.889289	55	5	-0.8044	0.95867	0.95924	0.993049	629	0	-0.8044
FBgn0025626	10	0.52298	0.72153	0.986454	467	2	-0.27198	0.96026	0.96088	0.993049	630	0	-0.27198
FBgn0004919	10	0.013984	0.056516	0.86129	39	5	-0.51844	0.96162	0.96233	0.993049	631	0	-0.51844
FBgn0031765	10	0.33418	0.55822	0.986454	353	1	-0.85224	0.96212	0.96283	0.993049	632	0	-0.85224
FBgn0003448	10	0.081478	0.22806	0.986454	143	4	-0.2285	0.96462	0.96531	0.993049	633	0	-0.2285
FBgn0038876	10	0.022319	0.085024	0.889289	60	6	-0.43501	0.96615	0.96683	0.993049	634	0	-0.43501
FBgn0010395	10	0.01471	0.058772	0.86129	41	4	-1.0409	0.9684	0.969	0.993049	635	0	-1.0409
FBgn0003984	10	0.016356	0.064402	0.86129	45	6	-0.82846	0.96978	0.97066	0.993049	636	0	-0.82846
FBgn0031214	10	0.047115	0.1486	0.919053	104	3	-1.0409	0.97331	0.97377	0.993049	637	0	-1.0409
FBgn0003731	10	0.0083148	0.036795	0.800312	28	5	-0.67217	0.97343	0.97384	0.993049	638	0	-0.67217
FBgn0051199	10	0.93526	0.93758	0.995161	611	1	-0.6426	0.97396	0.9745	0.993049	639	0	-0.6426
FBgn0031216	6	0.22194	0.37981	0.986454	277	2	-1.0409	0.97496	0.97477	0.993049	640	0	-1.0409
FBgn0015277	10	0.99159	0.99211	0.995161	647	0	-0.1591	0.97769	0.97838	0.994095	641	0	-0.1591
FBgn0030710	10	0.24615	0.47801	0.986454	294	3	-0.3042	0.97878	0.9795	0.994095	642	0	-0.3042
FBgn0053506	10	0.22111	0.44302	0.986454	276	4	-0.84639	0.97979	0.98037	0.994095	643	0	-0.84639
FBgn0029834	10	0.0026038	0.013917	0.716377	11	7	-0.55471	0.98186	0.98232	0.994525	644	0	-0.55471
FBgn0015269	10	0.097275	0.25874	0.986454	164	4	-1.0409	0.98611	0.98683	0.994957	645	0	-1.0409
FBgn0036039	10	0.68698	0.81177	0.993145	527	2	-0.20971	0.98759	0.98819	0.994957	646	0	-0.20971
FBgn0016930	10	0.3459	0.5688	0.986454	360	3	-0.32033	0.98768	0.98829	0.994957	647	0	-0.32033
FBgn0000274	10	0.05741	0.17322	0.935663	119	4	-0.97009	0.9883	0.98885	0.994957	648	0	-0.97009
FBgn0037672	10	0.16422	0.36221	0.986454	217	4	-0.39241	0.99069	0.99101	0.995591	649	0	-0.39241
FBgn0035496	10	0.05729	0.17297	0.935663	118	5	-0.95392	0.99467	0.99497	0.996586	650	0	-0.95392
FBgn0266667	10	0.088862	0.24387	0.986454	153	3	-1.0409	0.99477	0.99506	0.996586	651	0	-1.0409
FBgn0015570	8	0.64931	0.77274	0.992179	510	2	-1.0409	0.99957	0.99948	0.999481	652	0	-1.0409

## Sheet: S1E-1 rapa-30d
id	num	neg|score	neg|p-value	neg|fdr	neg|rank	neg|goodsgrna	neg|lfc	pos|score	pos|p-value	pos|fdr	pos|rank	pos|goodsgrna	pos|lfc
FBgn0033913	10	0.96899	0.96976	0.981802	621	0	1.9004	4.1021e-10	4.9476e-06	0.003226	1	6	1.9004
FBgn0000036	10	0.66513	0.78207	0.981802	471	1	0.075121	0.0001058	0.00077677	0.253226	2	4	0.075121
FBgn0044047	10	0.30842	0.50854	0.981802	308	2	-0.32635	0.0004407	0.0026568	0.405069	3	3	-0.32635
FBgn0019990	10	0.82752	0.85013	0.981802	539	1	0.84274	0.00069597	0.0039432	0.405069	4	6	0.84274
FBgn0069056	10	0.061928	0.17062	0.981802	88	2	0.65519	0.00072104	0.0040916	0.405069	5	7	0.65519
FBgn0003499	10	0.070691	0.18709	0.981802	101	4	-0.63268	0.00078899	0.004339	0.405069	6	3	-0.63268
FBgn0036876	10	0.61719	0.74666	0.981802	460	1	0.64297	0.00079042	0.0043489	0.405069	7	7	0.64297
FBgn0038681	10	0.96899	0.96976	0.981802	619	0	-0.075238	0.0014466	0.007644	0.547419	8	3	-0.075238
FBgn0030964	10	0.10015	0.24273	0.981802	139	1	0.19032	0.0015022	0.0079111	0.547419	9	5	0.19032
FBgn0036827	10	0.29024	0.48832	0.981802	299	2	0.49789	0.0015831	0.008396	0.547419	10	5	0.49789
FBgn0033656	10	0.96899	0.96976	0.981802	607	0	-0.24104	0.0039393	0.018538	0.971198	11	2	-0.24104
FBgn0035143	9	0.61532	0.73063	0.981802	459	1	0.42787	0.0040513	0.018261	0.971198	12	6	0.42787
FBgn0029979	10	0.54405	0.69043	0.981802	436	1	0.01426	0.0041556	0.019459	0.971198	13	3	0.01426
FBgn0027570	10	0.0039393	0.018172	0.911414	13	4	0.22758	0.0045391	0.020854	0.971198	14	5	0.22758
FBgn0026417	10	0.8097	0.84002	0.981802	527	1	0.35173	0.0059148	0.026445	0.978621	15	5	0.35173
FBgn0020224	9	0.17204	0.33498	0.981802	212	2	0.3999	0.0078703	0.032421	0.978621	16	4	0.3999
FBgn0001187	10	0.81633	0.84365	0.981802	532	1	0.08328	0.0086481	0.036854	0.978621	17	4	0.08328
FBgn0264959	10	0.61014	0.74084	0.981802	457	1	0.51886	0.0086837	0.036973	0.978621	18	6	0.51886
FBgn0061469	10	0.4508	0.62515	0.981802	378	2	0.35677	0.0088336	0.037596	0.978621	19	6	0.35677
FBgn0041094	10	0.28675	0.48424	0.981802	296	2	0.24181	0.0090747	0.038487	0.978621	20	5	0.24181
FBgn0020440	10	0.96899	0.96976	0.981802	606	0	-0.3766	0.0093163	0.039496	0.978621	21	5	-0.3766
FBgn0038515	10	0.43361	0.61372	0.981802	365	2	-0.089486	0.0095096	0.040189	0.978621	22	3	-0.089486
FBgn0037764	10	0.99698	0.99713	0.999807	648	0	0.51463	0.0095758	0.040426	0.978621	23	5	0.51463
FBgn0020386	10	0.84836	0.86216	0.981802	548	1	0.34119	0.0098805	0.041515	0.978621	24	5	0.34119
FBgn0063667	10	0.67788	0.78617	0.981802	473	1	0.40204	0.010123	0.042346	0.978621	25	6	0.40204
FBgn0030761	10	0.065533	0.17789	0.981802	93	3	0.26864	0.010213	0.042722	0.978621	26	4	0.26864
FBgn0001965	8	0.54223	0.67096	0.981802	434	1	0.25331	0.010684	0.039773	0.978621	27	4	0.25331
FBgn0027779	10	0.96899	0.96976	0.981802	598	0	0.16844	0.011836	0.048392	0.978621	28	5	0.16844
FBgn0260398	10	0.061377	0.16948	0.981802	87	1	0.48131	0.011896	0.04859	0.978621	29	5	0.48131
FBgn0028983	10	0.016452	0.059465	0.981802	32	2	0.40744	0.013141	0.052301	0.978621	30	5	0.40744
FBgn0036451	10	0.3462	0.55162	0.981802	328	2	0.074361	0.013151	0.05236	0.978621	31	4	0.074361
FBgn0033504	10	0.74929	0.81185	0.981802	502	1	0.15754	0.015618	0.059247	0.978621	32	4	0.15754
FBgn0015010	10	0.99977	0.99981	0.999807	652	0	0.37262	0.015674	0.059425	0.978621	33	4	0.37262
FBgn0037081	10	0.16101	0.34073	0.981802	206	3	-0.52421	0.015674	0.059425	0.978621	34	1	-0.52421
FBgn0030359	10	0.96899	0.96976	0.981802	577	0	-0.70631	0.018006	0.066065	0.978621	35	1	-0.70631
FBgn0039777	9	0.61532	0.73063	0.981802	458	1	-0.19803	0.019105	0.066035	0.978621	36	2	-0.19803
FBgn0024740	10	0.027283	0.090753	0.981802	48	2	-0.41842	0.019557	0.070349	0.978621	37	1	-0.41842
FBgn0023169	10	0.27856	0.47476	0.981802	292	2	0.23108	0.019572	0.070448	0.978621	38	5	0.23108
FBgn0028397	10	0.24676	0.43925	0.981802	274	1	0.15477	0.020193	0.07219	0.978621	39	4	0.15477
FBgn0037714	10	0.96899	0.96976	0.981802	633	0	0.25184	0.02103	0.074505	0.978621	40	5	0.25184
FBgn0030035	10	0.19847	0.38368	0.981802	232	3	-0.031351	0.021107	0.074713	0.978621	41	3	-0.031351
FBgn0042137	10	0.066583	0.17974	0.981802	94	2	0.13014	0.021819	0.077048	0.978621	42	2	0.13014
FBgn0038705	10	0.040177	0.12619	0.981802	65	3	0.31206	0.022407	0.07882	0.978621	43	4	0.31206
FBgn0039153	10	0.52189	0.67466	0.981802	422	2	-0.24905	0.023427	0.081659	0.978621	44	2	-0.24905
FBgn0037688	10	0.0015278	0.0078815	0.844194	5	3	-0.25153	0.023427	0.081659	0.978621	45	3	-0.25153
FBgn0031662	10	0.4508	0.62515	0.981802	379	1	0.25921	0.024798	0.085152	0.978621	46	4	0.25921
FBgn0037653	10	0.36453	0.56871	0.981802	335	2	0.20279	0.024984	0.085746	0.978621	47	5	0.20279
FBgn0086708	10	0.41642	0.6025	0.981802	359	2	-0.066003	0.02605	0.088616	0.978621	48	4	-0.066003
FBgn0035101	10	0.20891	0.39576	0.981802	237	2	-0.40356	0.026541	0.089932	0.978621	49	3	-0.40356
FBgn0265042	10	0.025743	0.08633	0.981802	45	1	-0.24664	0.026619	0.090169	0.978621	50	5	-0.24664
FBgn0003079	10	0.2347	0.42557	0.981802	263	2	0.22032	0.027073	0.091535	0.978621	51	5	0.22032
FBgn0023213	10	0.055396	0.15783	0.981802	80	2	-1.0635	0.027283	0.092059	0.978621	52	4	-1.0635
FBgn0000711	10	0.71098	0.79734	0.981802	487	1	-0.20699	0.027283	0.092059	0.978621	53	2	-0.20699
FBgn0011754	10	0.96899	0.96976	0.981802	576	0	0.0076009	0.027283	0.092059	0.978621	54	2	0.0076009
FBgn0050046	10	0.99497	0.99522	0.999807	646	0	0.33558	0.027905	0.093454	0.978621	55	5	0.33558
FBgn0025781	10	0.96899	0.96976	0.981802	631	0	0.15051	0.029929	0.099055	0.978621	56	4	0.15051
FBgn0265268	10	0.62149	0.74996	0.981802	462	1	-0.18523	0.030358	0.10006	0.978621	57	3	-0.18523
FBgn0022382	7	0.51758	0.62077	0.981802	418	1	0.24691	0.031376	0.092346	0.978621	58	4	0.24691
FBgn0046692	10	0.65406	0.77617	0.981802	468	1	-0.051805	0.031635	0.10349	0.978621	59	4	-0.051805
FBgn0005775	10	0.031724	0.10278	0.981802	54	4	-0.51079	0.031893	0.10418	0.978621	60	3	-0.51079
FBgn0053098	10	0.51688	0.67092	0.981802	417	1	0.47465	0.031915	0.10424	0.978621	61	5	0.47465
FBgn0024992	10	0.0064064	0.028147	0.981802	17	4	-1.0151	0.032837	0.10684	0.978621	62	4	-1.0151
FBgn0053159	10	0.12894	0.29534	0.981802	169	3	0.14808	0.032968	0.10724	0.978621	63	4	0.14808
FBgn0003892	10	0.43773	0.6165	0.981802	368	2	0.43307	0.033476	0.10859	0.978621	64	5	0.43307
FBgn0264357	10	0.99539	0.99552	0.999807	647	0	0.36611	0.034184	0.11058	0.978621	65	5	0.36611
FBgn0086442	10	0.085785	0.21574	0.981802	122	2	-0.43417	0.03419	0.1106	0.978621	66	3	-0.43417
FBgn0004861	10	0.99754	0.99773	0.999807	649	0	0.40782	0.034437	0.11112	0.978621	67	5	0.40782
FBgn0001179	10	0.036403	0.11586	0.981802	59	4	-1.0635	0.037245	0.11889	0.978621	68	2	-1.0635
FBgn0029522	10	0.011429	0.045236	0.981802	21	4	-1.0635	0.037245	0.11889	0.978621	69	2	-1.0635
FBgn0032223	10	0.53761	0.68578	0.981802	428	2	0.21457	0.039053	0.12378	0.978621	70	5	0.21457
FBgn0037074	10	0.38911	0.58467	0.981802	347	2	-0.6507	0.039531	0.12505	0.978621	71	3	-0.6507
FBgn0028538	10	0.96899	0.96976	0.981802	629	0	0.26018	0.039758	0.12558	0.978621	72	5	0.26018
FBgn0052383	10	0.18069	0.36338	0.981802	219	1	-1.0635	0.040177	0.12663	0.978621	73	2	-1.0635
FBgn0010379	10	0.96899	0.96976	0.981802	615	0	0.2068	0.040533	0.12755	0.978621	74	5	0.2068
FBgn0033315	10	0.2673	0.46221	0.981802	287	1	0.27691	0.04072	0.12811	0.978621	75	5	0.27691
FBgn0015828	10	0.12426	0.28641	0.981802	161	1	0.30286	0.04072	0.12811	0.978621	76	5	0.30286
FBgn0037140	10	0.40597	0.59557	0.981802	353	1	0.055921	0.041052	0.1289	0.978621	77	5	0.055921
FBgn0027101	10	0.96899	0.96976	0.981802	614	0	-0.65163	0.041969	0.13147	0.978621	78	3	-0.65163
FBgn0037647	10	0.30744	0.50744	0.981802	306	1	-0.042996	0.042571	0.13317	0.978621	79	3	-0.042996
FBgn0004657	10	0.60947	0.74026	0.981802	456	1	-0.52574	0.044088	0.1371	0.978621	80	2	-0.52574
FBgn0037606	10	0.55254	0.69644	0.981802	443	1	-0.0045581	0.045603	0.1413	0.978621	81	3	-0.0045581
FBgn0020236	10	0.75425	0.81404	0.981802	505	1	0.31833	0.047461	0.14586	0.978621	82	5	0.31833
FBgn0033569	10	0.71201	0.79769	0.981802	488	1	0.17775	0.047672	0.14636	0.978621	83	3	0.17775
FBgn0032691	8	0.31125	0.4724	0.981802	311	1	-1.0635	0.047746	0.13035	0.978621	84	2	-1.0635
FBgn0031463	10	0.45721	0.62959	0.981802	382	1	0.28145	0.048626	0.14853	0.978621	85	4	0.28145
FBgn0063495	10	0.13817	0.31163	0.981802	179	2	-1.0635	0.049441	0.15061	0.978621	86	2	-1.0635
FBgn0034350	9	0.13194	0.28278	0.981802	172	3	-0.40466	0.051088	0.14442	0.978621	87	3	-0.40466
FBgn0038258	10	0.96899	0.96976	0.981802	571	0	0.0065266	0.05164	0.15619	0.978621	88	3	0.0065266
FBgn0039924	10	0.46279	0.63314	0.981802	385	2	-0.85231	0.052845	0.1591	0.978621	89	4	-0.85231
FBgn0034249	10	0.07985	0.20477	0.981802	113	1	0.030387	0.052957	0.15946	0.978621	90	3	0.030387
FBgn0038017	10	0.099758	0.24207	0.981802	136	3	-0.96285	0.053144	0.15995	0.978621	91	1	-0.96285
FBgn0037492	10	0.81304	0.84174	0.981802	529	1	0.11246	0.053353	0.16059	0.978621	92	3	0.11246
FBgn0046689	10	0.46084	0.63186	0.981802	384	1	0.12227	0.053458	0.16095	0.978621	93	4	0.12227
FBgn0264340	10	0.80881	0.83955	0.981802	525	1	0.25317	0.053634	0.16152	0.978621	94	4	0.25317
FBgn0037516	10	0.96899	0.96976	0.981802	587	0	-0.25885	0.05375	0.16182	0.978621	95	2	-0.25885
FBgn0039941	10	0.11598	0.27135	0.981802	153	3	-0.18378	0.054149	0.16262	0.978621	96	2	-0.18378
FBgn0000229	10	0.51282	0.66816	0.981802	416	2	-0.23254	0.05484	0.16397	0.978621	97	3	-0.23254
FBgn0030018	8	0.78021	0.7911	0.981802	515	1	0.31064	0.056035	0.14988	0.978621	98	4	0.31064
FBgn0011300	10	0.9987	0.99884	0.999807	651	0	-0.040651	0.056145	0.16656	0.978621	99	2	-0.040651
FBgn0035508	10	0.078384	0.20205	0.981802	111	3	0.0381	0.057755	0.16961	0.978621	100	3	0.0381
FBgn0036970	10	0.21499	0.4032	0.981802	244	2	-0.20749	0.058391	0.17076	0.978621	101	2	-0.20749
FBgn0260972	10	0.96899	0.96976	0.981802	608	0	-0.31555	0.0613	0.17627	0.978621	102	2	-0.31555
FBgn0031653	10	0.34038	0.54512	0.981802	324	2	0.079472	0.061636	0.17687	0.978621	103	3	0.079472
FBgn0259168	10	0.14642	0.32348	0.981802	188	2	-0.079997	0.061636	0.17687	0.978621	104	3	-0.079997
FBgn0016984	10	0.36697	0.57034	0.981802	338	2	0.26164	0.061636	0.17687	0.978621	105	4	0.26164
FBgn0024329	10	0.19193	0.37627	0.981802	225	3	-0.08141	0.062122	0.17782	0.978621	106	2	-0.08141
FBgn0031216	6	0.87559	0.87566	0.981802	554	0	-0.70819	0.064494	0.14784	0.978621	107	1	-0.70819
FBgn0000464	10	0.96899	0.96976	0.981802	625	0	0.15528	0.066583	0.18617	0.978621	108	4	0.15528
FBgn0034700	10	0.96899	0.96976	0.981802	616	0	0.01946	0.066583	0.18617	0.978621	109	2	0.01946
FBgn0036044	10	0.55253	0.69644	0.981802	441	2	0.072325	0.066702	0.18639	0.978621	110	3	0.072325
FBgn0004784	10	0.50422	0.66209	0.981802	409	2	0.23464	0.067521	0.18791	0.978621	111	4	0.23464
FBgn0028563	10	0.96899	0.96976	0.981802	581	0	0.038201	0.068338	0.18932	0.978621	112	3	0.038201
FBgn0029661	4	0.75079	0.75116	0.981802	504	0	0.36832	0.068387	0.13208	0.978621	113	2	0.36832
FBgn0262103	10	0.84022	0.85714	0.981802	545	1	0.029082	0.068569	0.18957	0.978621	114	4	0.029082
FBgn0034783	10	0.96899	0.96976	0.981802	594	0	-0.10253	0.069249	0.19076	0.978621	115	4	-0.10253
FBgn0086384	9	0.0092082	0.035321	0.981802	20	3	-1.0635	0.070914	0.1837	0.978621	116	2	-1.0635
FBgn0024754	10	0.56762	0.70819	0.981802	448	1	0.14512	0.071024	0.1939	0.978621	117	3	0.14512
FBgn0052568	10	0.31703	0.51861	0.981802	312	2	-0.59495	0.072292	0.19602	0.978621	118	3	-0.59495
FBgn0030505	10	0.11157	0.26347	0.981802	149	1	-0.23668	0.072382	0.19617	0.978621	119	4	-0.23668
FBgn0034307	10	0.96899	0.96976	0.981802	599	0	0.26855	0.0725	0.19634	0.978621	120	4	0.26855
FBgn0262739	7	0.19299	0.34343	0.981802	227	2	-0.26918	0.07265	0.17408	0.978621	121	3	-0.26918
FBgn0032372	10	0.069647	0.18532	0.981802	100	3	-0.4887	0.073974	0.19924	0.978621	122	3	-0.4887
FBgn0034567	10	0.52663	0.67801	0.981802	425	1	0.19174	0.074047	0.19941	0.978621	123	3	0.19174
FBgn0263782	8	0.78338	0.79351	0.981802	517	1	-0.24364	0.075076	0.19131	0.978621	124	1	-0.24364
FBgn0035522	10	0.13332	0.30344	0.981802	177	2	-0.53606	0.075446	0.20173	0.978621	125	3	-0.53606
FBgn0002174	10	0.015618	0.057169	0.981802	30	4	-0.84077	0.076916	0.20444	0.978621	126	1	-0.84077
FBgn0050293	10	0.96899	0.96976	0.981802	593	0	0.26367	0.077149	0.20485	0.978621	127	3	0.26367
FBgn0259166	9	0.95612	0.95513	0.981802	565	0	-1.0635	0.078745	0.19922	0.978621	128	3	-1.0635
FBgn0035769	10	0.96899	0.96976	0.981802	578	0	0.11521	0.079971	0.2103	0.978621	129	4	0.11521
FBgn0031040	10	0.55042	0.69497	0.981802	438	2	-0.75495	0.081313	0.21282	0.978621	130	3	-0.75495
FBgn0034029	10	0.17339	0.35518	0.981802	213	3	-0.02693	0.081715	0.21343	0.978621	131	4	-0.02693
FBgn0024248	8	0.93789	0.9372	0.981802	557	0	0.090266	0.082507	0.20734	0.978621	132	4	0.090266
FBgn0000273	10	0.24604	0.43832	0.981802	272	3	-0.23149	0.082652	0.21508	0.978621	133	4	-0.23149
FBgn0041164	10	0.99762	0.99777	0.999807	650	0	0.19559	0.083983	0.2173	0.978621	134	4	0.19559
FBgn0037504	10	0.074906	0.19495	0.981802	108	4	-0.7802	0.084234	0.21774	0.978621	135	2	-0.7802
FBgn0039532	10	0.55253	0.69644	0.981802	442	2	-0.043665	0.084441	0.21809	0.978621	136	4	-0.043665
FBgn0035425	10	0.44153	0.61896	0.981802	371	1	-0.36439	0.085691	0.22028	0.978621	137	4	-0.36439
FBgn0030855	10	0.32164	0.52387	0.981802	314	2	-0.3187	0.087147	0.2229	0.978621	138	3	-0.3187
FBgn0053554	10	0.38609	0.58266	0.981802	344	2	-0.58894	0.087438	0.22339	0.978621	139	2	-0.58894
FBgn0030620	10	0.25103	0.44415	0.981802	277	2	-0.12397	0.087684	0.22382	0.978621	140	4	-0.12397
FBgn0029893	10	0.96899	0.96976	0.981802	644	0	-0.31703	0.088489	0.22522	0.978621	141	4	-0.31703
FBgn0034202	10	0.38911	0.58467	0.981802	348	2	-0.061194	0.0886	0.2255	0.978621	142	3	-0.061194
FBgn0036908	10	0.30996	0.51039	0.981802	309	2	-0.15353	0.089404	0.22701	0.978621	143	4	-0.15353
FBgn0267339	10	0.96899	0.96976	0.981802	600	0	-1.0635	0.091093	0.23022	0.978621	144	3	-1.0635
FBgn0028717	10	0.125	0.28809	0.981802	164	3	-0.66234	0.092947	0.23346	0.978621	145	2	-0.66234
FBgn0033246	10	0.74929	0.81185	0.981802	501	1	-0.74092	0.092947	0.23346	0.978621	146	3	-0.74092
FBgn0040871	10	0.96899	0.96976	0.981802	626	0	-0.14529	0.092947	0.23346	0.978621	147	1	-0.14529
FBgn0033980	10	0.36315	0.56777	0.981802	334	1	-0.37062	0.093181	0.23386	0.978621	148	2	-0.37062
FBgn0036038	10	0.96899	0.96976	0.981802	592	0	0.32123	0.094375	0.23613	0.978621	149	4	0.32123
FBgn0050020	10	0.087918	0.21953	0.981802	125	4	-0.62626	0.094636	0.23664	0.978621	150	2	-0.62626
FBgn0033917	10	0.42563	0.60874	0.981802	363	2	0.13874	0.096723	0.24022	0.978621	151	4	0.13874
FBgn0039734	10	0.0034062	0.015887	0.911414	11	5	-0.82631	0.099822	0.24596	0.978621	152	4	-0.82631
FBgn0034356	10	0.79841	0.83422	0.981802	522	1	-0.062195	0.10015	0.24645	0.978621	153	4	-0.062195
FBgn0037327	9	0.95612	0.95513	0.981802	561	0	0.28086	0.10106	0.24295	0.978621	154	4	0.28086
FBgn0283536	10	0.065098	0.17693	0.981802	91	2	-1.0635	0.10158	0.24922	0.978621	155	2	-1.0635
FBgn0032763	10	0.3006	0.50033	0.981802	304	2	-0.16755	0.10302	0.25171	0.978621	156	3	-0.16755
FBgn0029858	10	0.14046	0.31555	0.981802	181	3	-0.27324	0.10351	0.25266	0.978621	157	3	-0.27324
FBgn0038466	10	0.80881	0.83955	0.981802	526	1	-0.40166	0.10401	0.25353	0.978621	158	2	-0.40166
FBgn0004919	10	0.96899	0.96976	0.981802	584	0	0.2062	0.10492	0.25507	0.978621	159	4	0.2062
FBgn0027356	8	0.93789	0.9372	0.981802	558	0	0.21078	0.10528	0.24052	0.978621	160	3	0.21078
FBgn0019890	10	0.48566	0.64883	0.981802	397	1	-0.39743	0.10602	0.25716	0.978621	161	3	-0.39743
FBgn0037156	9	0.36002	0.5351	0.981802	330	1	-0.031848	0.10652	0.25246	0.978621	162	3	-0.031848
FBgn0033685	10	0.96899	0.96976	0.981802	585	0	-0.12863	0.10804	0.26051	0.978621	163	3	-0.12863
FBgn0030071	10	0.96899	0.96976	0.981802	582	0	0.082612	0.10845	0.2612	0.978621	164	3	0.082612
FBgn0036271	10	0.83855	0.85619	0.981802	543	1	-0.3171	0.10962	0.2631	0.978621	165	4	-0.3171
FBgn0035469	10	0.24334	0.43529	0.981802	268	3	0.15755	0.11174	0.26672	0.978621	166	4	0.15755
FBgn0259243	10	0.024939	0.084074	0.981802	44	3	-0.35529	0.11215	0.26758	0.978621	167	3	-0.35529
FBgn0010015	10	0.7334	0.80566	0.981802	494	1	0.07889	0.11624	0.27431	0.978621	168	3	0.07889
FBgn0030384	10	0.37256	0.57389	0.981802	339	1	-0.39888	0.11676	0.27514	0.978621	169	3	-0.39888
FBgn0024846	10	0.96899	0.96976	0.981802	640	0	-0.02664	0.11728	0.27592	0.978621	170	3	-0.02664
FBgn0259152	10	0.0242	0.082174	0.981802	43	3	-0.67939	0.11864	0.27844	0.978621	171	3	-0.67939
FBgn0051992	10	0.12697	0.29169	0.981802	166	3	0.10676	0.11884	0.27884	0.978621	172	3	0.10676
FBgn0000039	10	0.76216	0.81743	0.981802	510	1	0.11797	0.12046	0.28163	0.978621	173	4	0.11797
FBgn0015582	9	0.44228	0.59601	0.981802	373	2	-0.1582	0.12083	0.27783	0.978621	174	1	-0.1582
FBgn0083141	10	0.84441	0.8596	0.981802	546	1	-0.030321	0.12093	0.28245	0.978621	175	2	-0.030321
FBgn0025626	10	0.81889	0.84497	0.981802	533	1	-0.41284	0.12182	0.28409	0.978621	176	3	-0.41284
FBgn0032871	10	0.4148	0.6015	0.981802	357	1	-0.13644	0.12198	0.28436	0.978621	177	3	-0.13644
FBgn0037678	10	0.017854	0.063799	0.981802	34	4	-0.39224	0.12496	0.29	0.978621	178	3	-0.39224
FBgn0270928	10	0.14505	0.32179	0.981802	187	2	0.05284	0.12496	0.29	0.978621	179	3	0.05284
FBgn0030539	10	0.073626	0.19261	0.981802	105	4	-0.34601	0.12496	0.29	0.978621	180	1	-0.34601
FBgn0038715	10	0.22759	0.41731	0.981802	254	1	-0.62552	0.12496	0.29	0.978621	181	3	-0.62552
FBgn0031897	10	0.32226	0.52446	0.981802	315	2	0.06299	0.12726	0.29404	0.978621	182	4	0.06299
FBgn0040068	10	0.96899	0.96976	0.981802	569	0	-0.70313	0.12726	0.29404	0.978621	183	2	-0.70313
FBgn0024222	10	0.73412	0.80594	0.981802	495	1	0.00048103	0.12822	0.29575	0.978621	184	3	0.00048103
FBgn0001089	10	0.66217	0.7812	0.981802	470	1	-0.1466	0.12966	0.2982	0.978621	185	3	-0.1466
FBgn0033128	10	0.014895	0.054953	0.981802	27	3	-0.21345	0.12992	0.29872	0.978621	186	3	-0.21345
FBgn0261858	10	0.11864	0.27605	0.981802	159	1	0.26147	0.13075	0.30009	0.978621	187	3	0.26147
FBgn0039796	10	0.15033	0.32814	0.981802	191	3	-0.4902	0.1327	0.30374	0.978621	188	4	-0.4902
FBgn0003890	8	0.2894	0.45495	0.981802	298	2	-0.7151	0.13299	0.27923	0.978621	189	1	-0.7151
FBgn0050094	10	0.96899	0.96976	0.981802	638	0	0.25835	0.13328	0.30478	0.978621	190	4	0.25835
FBgn0034173	10	0.44184	0.61911	0.981802	372	2	-0.35789	0.13402	0.30593	0.978621	191	3	-0.35789
FBgn0023512	10	0.66039	0.78065	0.981802	469	1	-0.16925	0.13476	0.30708	0.978621	192	3	-0.16925
FBgn0004463	10	0.57095	0.71094	0.981802	449	1	-0.48012	0.13584	0.30897	0.978621	193	4	-0.48012
FBgn0005592	10	0.96899	0.96976	0.981802	566	0	0.10061	0.13592	0.30905	0.978621	194	4	0.10061
FBgn0010549	10	0.96899	0.96976	0.981802	632	0	0.16831	0.13651	0.31002	0.978621	195	4	0.16831
FBgn0003256	10	0.96899	0.96976	0.981802	624	0	-1.0635	0.13678	0.31043	0.978621	196	2	-1.0635
FBgn0032700	10	0.28442	0.48143	0.981802	294	2	0.34947	0.13859	0.31344	0.978621	197	4	0.34947
FBgn0039421	10	0.96899	0.96976	0.981802	590	0	-0.37468	0.13886	0.31388	0.978621	198	2	-0.37468
FBgn0020660	8	0.083185	0.19927	0.981802	118	3	-0.7712	0.13907	0.28759	0.978621	199	3	-0.7712
FBgn0266411	10	0.2286	0.41848	0.981802	255	3	-0.36343	0.13993	0.31565	0.978621	200	3	-0.36343
FBgn0036695	10	0.24921	0.44202	0.981802	276	3	0.01762	0.14068	0.31673	0.978621	201	3	0.01762
FBgn0035046	10	0.033536	0.10786	0.981802	56	3	0.079395	0.14092	0.31713	0.978621	202	2	0.079395
FBgn0050378	10	0.52407	0.67622	0.981802	423	2	-0.045405	0.14128	0.31774	0.978621	203	4	-0.045405
FBgn0039938	10	0.013115	0.049955	0.981802	23	4	-0.93734	0.14367	0.32163	0.978621	204	3	-0.93734
FBgn0033047	10	0.69619	0.79228	0.981802	483	1	-0.15318	0.14368	0.32164	0.978621	205	3	-0.15318
FBgn0026179	10	0.19183	0.3762	0.981802	224	2	-0.15927	0.14457	0.32314	0.978621	206	2	-0.15927
FBgn0086359	10	0.16135	0.34124	0.981802	207	2	-0.31668	0.14642	0.32614	0.978621	207	2	-0.31668
FBgn0030793	10	0.58188	0.71934	0.981802	452	1	0.11909	0.1489	0.3305	0.978621	208	4	0.11909
FBgn0012058	10	0.96899	0.96976	0.981802	568	0	-0.51235	0.14915	0.33081	0.978621	209	3	-0.51235
FBgn0038524	10	0.02582	0.086538	0.981802	46	2	-0.6411	0.15014	0.33233	0.978621	210	3	-0.6411
FBgn0038332	10	0.55622	0.69919	0.981802	444	2	0.13255	0.15051	0.33291	0.978621	211	3	0.13255
FBgn0053100	10	0.25474	0.44832	0.981802	280	2	-0.029605	0.15076	0.33334	0.978621	212	4	-0.029605
FBgn0021856	10	0.020141	0.07027	0.981802	38	4	-1.0545	0.15107	0.33391	0.978621	213	4	-1.0545
FBgn0037538	10	0.96899	0.96976	0.981802	589	0	0.016832	0.15188	0.33546	0.978621	214	3	0.016832
FBgn0037679	10	0.22957	0.41957	0.981802	256	2	-0.26227	0.15287	0.33705	0.978621	215	3	-0.26227
FBgn0002940	10	0.33148	0.5347	0.981802	319	2	-1.0227	0.15399	0.33888	0.978621	216	3	-1.0227
FBgn0003483	10	0.96899	0.96976	0.981802	642	0	0.028733	0.15476	0.34006	0.978621	217	3	0.028733
FBgn0035995	10	0.29198	0.49035	0.981802	300	2	-0.16552	0.15595	0.34198	0.978621	218	3	-0.16552
FBgn0000038	10	0.145	0.32175	0.981802	186	3	-0.036968	0.15735	0.34405	0.978621	219	2	-0.036968
FBgn0034687	10	0.38911	0.58467	0.981802	346	2	-0.072274	0.15749	0.34424	0.978621	220	3	-0.072274
FBgn0030538	8	0.014431	0.050955	0.981802	26	2	-0.5457	0.15775	0.31306	0.978621	221	2	-0.5457
FBgn0035090	10	0.31083	0.51137	0.981802	310	2	-0.37101	0.16116	0.35062	0.978621	222	4	-0.37101
FBgn0034265	10	0.053144	0.15285	0.981802	78	2	0.0435	0.16309	0.35398	0.978621	223	4	0.0435
FBgn0052202	10	0.13332	0.30344	0.981802	175	2	-1.0635	0.16337	0.35455	0.978621	224	2	-1.0635
FBgn0053121	9	0.95612	0.95513	0.981802	562	0	0.047803	0.16359	0.33361	0.978621	225	2	0.047803
FBgn0040368	10	0.15903	0.33844	0.981802	203	2	0.052068	0.1647	0.35682	0.978621	226	4	0.052068
FBgn0001281	10	0.52096	0.67402	0.981802	421	1	0.047314	0.16497	0.35721	0.978621	227	3	0.047314
FBgn0032642	10	0.49895	0.65795	0.981802	407	1	-0.17334	0.16537	0.35773	0.978621	228	3	-0.17334
FBgn0033471	10	0.28659	0.48401	0.981802	295	2	-0.39275	0.166	0.35869	0.978621	229	4	-0.39275
FBgn0030674	5	0.53776	0.56499	0.981802	429	1	-1.0635	0.16734	0.27504	0.978621	230	2	-1.0635
FBgn0260648	10	0.49077	0.65229	0.981802	401	2	-0.3044	0.16756	0.3611	0.978621	231	3	-0.3044
FBgn0085447	10	0.41578	0.60214	0.981802	358	1	0.090076	0.16807	0.36198	0.978621	232	2	0.090076
FBgn0003371	10	0.113	0.26629	0.981802	151	3	-0.53336	0.16856	0.36268	0.978621	233	3	-0.53336
FBgn0267698	10	0.96899	0.96976	0.981802	634	0	0.20983	0.1694	0.36402	0.978621	234	3	0.20983
FBgn0042693	10	0.65406	0.77617	0.981802	467	1	-0.23373	0.17074	0.36614	0.978621	235	2	-0.23373
FBgn0020412	10	0.028822	0.094751	0.981802	49	2	0.14669	0.1714	0.36719	0.978621	236	4	0.14669
FBgn0030342	10	0.44525	0.62151	0.981802	375	2	-0.050259	0.17207	0.36823	0.978621	237	1	-0.050259
FBgn0037828	10	0.83057	0.85171	0.981802	541	1	-0.21254	0.17382	0.37006	0.978621	238	3	-0.21254
FBgn0266721	10	0.96899	0.96976	0.981802	595	0	-0.20378	0.17473	0.371	0.978621	239	2	-0.20378
FBgn0014427	10	0.25923	0.45333	0.981802	284	3	-0.14657	0.17672	0.37301	0.978621	240	3	-0.14657
FBgn0035823	10	0.15051	0.32833	0.981802	192	2	-0.04159	0.17868	0.37516	0.978621	241	3	-0.04159
FBgn0029999	7	0.71912	0.73413	0.981802	490	1	-0.68251	0.17945	0.33671	0.978621	242	3	-0.68251
FBgn0052425	10	0.15065	0.32852	0.981802	193	2	-0.71411	0.18003	0.37665	0.978621	243	3	-0.71411
FBgn0015295	10	0.29716	0.49647	0.981802	302	2	-0.49759	0.18155	0.37814	0.978621	244	3	-0.49759
FBgn0039064	10	0.40794	0.5968	0.981802	354	1	-0.09916	0.18266	0.37937	0.978621	245	2	-0.09916
FBgn0026090	10	0.09202	0.2276	0.981802	126	3	-0.48433	0.18392	0.38076	0.978621	246	3	-0.48433
FBgn0032934	10	0.82703	0.84982	0.981802	538	1	-0.32103	0.18398	0.38083	0.978621	247	2	-0.32103
FBgn0264574	10	0.96899	0.96976	0.981802	637	0	0.058075	0.1848	0.38175	0.978621	248	2	0.058075
FBgn0033491	10	0.15768	0.33652	0.981802	202	3	-0.53561	0.18596	0.38294	0.978621	249	3	-0.53561
FBgn0000326	10	0.96899	0.96976	0.981802	620	0	-0.16225	0.18791	0.38501	0.978621	250	2	-0.16225
FBgn0003984	10	0.034558	0.11063	0.981802	58	4	-0.75227	0.19118	0.38854	0.978621	251	2	-0.75227
FBgn0036346	10	0.0086481	0.036755	0.981802	19	2	-0.2896	0.19118	0.38854	0.978621	252	3	-0.2896
FBgn0039115	10	0.80756	0.83894	0.981802	524	1	-0.034409	0.19297	0.39047	0.978621	253	2	-0.034409
FBgn0262870	10	0.96899	0.96976	0.981802	573	0	-0.2961	0.19572	0.39315	0.978621	254	3	-0.2961
FBgn0034996	10	0.00078899	0.0043291	0.844194	3	2	-0.91554	0.19962	0.39738	0.978621	255	1	-0.91554
FBgn0035574	8	0.93789	0.9372	0.981802	559	0	-0.18969	0.20014	0.36944	0.978621	256	2	-0.18969
FBgn0011474	10	0.20477	0.39117	0.981802	236	2	-0.29353	0.2022	0.40037	0.978621	257	2	-0.29353
FBgn0004108	10	0.20477	0.39117	0.981802	234	1	-0.065835	0.20298	0.40116	0.978621	258	2	-0.065835
FBgn0030332	10	0.16337	0.34379	0.981802	209	2	-0.025031	0.20336	0.40159	0.978621	259	3	-0.025031
FBgn0034730	10	0.12939	0.29607	0.981802	170	2	-0.24549	0.20851	0.40709	0.978621	260	3	-0.24549
FBgn0250823	10	0.40794	0.5968	0.981802	355	1	-0.31068	0.20989	0.40882	0.978621	261	3	-0.31068
FBgn0030530	8	0.78272	0.793	0.981802	516	1	-0.0020026	0.21025	0.3827	0.978621	262	3	-0.0020026
FBgn0028500	10	0.1073	0.25603	0.981802	145	3	-0.89379	0.2104	0.40935	0.978621	263	2	-0.89379
FBgn0028530	10	0.23438	0.42519	0.981802	262	3	-0.61799	0.21244	0.41174	0.978621	264	2	-0.61799
FBgn0029672	8	0.2706	0.43984	0.981802	289	1	0.16031	0.21307	0.38621	0.978621	265	3	0.16031
FBgn0052451	10	0.2163	0.40475	0.981802	245	3	-0.031581	0.21372	0.41311	0.978621	266	3	-0.031581
FBgn0014011	10	0.79597	0.83311	0.981802	521	1	-0.23087	0.215	0.41452	0.978621	267	3	-0.23087
FBgn0036717	10	0.81181	0.84108	0.981802	528	1	-0.44394	0.21625	0.41588	0.978621	268	2	-0.44394
FBgn0033086	10	0.092216	0.22801	0.981802	127	3	-0.46391	0.21726	0.41703	0.978621	269	2	-0.46391
FBgn0264298	10	0.47458	0.64088	0.981802	389	2	-0.23149	0.21805	0.41789	0.978621	270	3	-0.23149
FBgn0038438	9	0.5743	0.70391	0.981802	451	1	-1.0483	0.21829	0.39882	0.978621	271	1	-1.0483
FBgn0036489	4	0.48022	0.49302	0.981802	393	1	-0.92676	0.21946	0.33052	0.978621	272	1	-0.92676
FBgn0039584	10	0.3849	0.58185	0.981802	343	1	-0.066338	0.22085	0.42053	0.978621	273	2	-0.066338
FBgn0032519	10	0.13099	0.29907	0.981802	171	3	-0.43533	0.22257	0.42257	0.978621	274	2	-0.43533
FBgn0265137	10	0.15321	0.33151	0.981802	198	3	-1.0022	0.22383	0.42389	0.978621	275	2	-1.0022
FBgn0036964	9	0.23388	0.41238	0.981802	261	2	-0.089985	0.22398	0.40566	0.978621	276	1	-0.089985
FBgn0004507	10	0.39099	0.58605	0.981802	349	2	-0.17927	0.22508	0.42514	0.978621	277	3	-0.17927
FBgn0040098	10	0.96899	0.96976	0.981802	567	0	-1.0635	0.22759	0.42768	0.978621	278	1	-1.0635
FBgn0036659	10	0.13256	0.30207	0.981802	173	3	-0.18153	0.22927	0.42949	0.978621	279	3	-0.18153
FBgn0033677	6	0.64727	0.66599	0.981802	465	1	-0.47874	0.23188	0.36437	0.978621	280	1	-0.47874
FBgn0029834	10	0.50695	0.664	0.981802	411	1	0.043016	0.23661	0.43746	0.978621	281	3	0.043016
FBgn0041627	10	0.54324	0.68979	0.981802	435	2	-0.35577	0.2375	0.4384	0.978621	282	3	-0.35577
FBgn0044826	10	0.74929	0.81185	0.981802	503	1	-0.77744	0.23939	0.44046	0.978621	283	2	-0.77744
FBgn0024698	9	0.48851	0.63182	0.981802	400	2	-0.44051	0.24027	0.42476	0.978621	284	1	-0.44051
FBgn0038485	10	0.020461	0.07127	0.981802	40	5	-0.59916	0.24409	0.44537	0.978621	285	2	-0.59916
FBgn0260646	10	0.70367	0.79487	0.981802	485	1	0.074498	0.24554	0.44687	0.978621	286	3	0.074498
FBgn0031195	10	0.96899	0.96976	0.981802	602	0	0.10799	0.24695	0.44855	0.978621	287	3	0.10799
FBgn0259190	10	0.016353	0.059237	0.981802	31	5	-0.20928	0.24876	0.45035	0.978621	288	3	-0.20928
FBgn0010340	10	0.39502	0.58867	0.981802	350	1	-0.042186	0.25012	0.45179	0.978621	289	3	-0.042186
FBgn0033266	10	0.11746	0.27369	0.981802	157	3	-0.16035	0.25048	0.45212	0.978621	290	2	-0.16035
FBgn0050495	10	0.0045392	0.020508	0.955069	14	4	-0.70133	0.25164	0.45347	0.978621	291	1	-0.70133
FBgn0004118	10	0.96899	0.96976	0.981802	612	0	-0.23466	0.2523	0.45418	0.978621	292	2	-0.23466
FBgn0053169	10	0.2363	0.42742	0.981802	265	1	-0.62802	0.25375	0.45572	0.978621	293	3	-0.62802
FBgn0004864	10	0.46804	0.63651	0.981802	387	1	-1.0635	0.25468	0.45673	0.978621	294	2	-1.0635
FBgn0038862	10	0.96899	0.96976	0.981802	583	0	-0.14783	0.2558	0.45785	0.978621	295	3	-0.14783
FBgn0038952	10	0.15343	0.33183	0.981802	199	3	-0.47252	0.25786	0.46016	0.978621	296	3	-0.47252
FBgn0033199	10	0.36209	0.56706	0.981802	333	2	-0.68912	0.2583	0.46066	0.978621	297	2	-0.68912
FBgn0042627	10	0.068556	0.18326	0.981802	97	2	-0.32289	0.25968	0.46206	0.978621	298	3	-0.32289
FBgn0031561	9	0.95612	0.95513	0.981802	564	0	-0.089985	0.26305	0.4519	0.978621	299	2	-0.089985
FBgn0036118	10	0.069045	0.18413	0.981802	98	4	-0.37917	0.26381	0.46621	0.978621	300	3	-0.37917
FBgn0050476	10	0.092947	0.2292	0.981802	129	2	-0.40895	0.26421	0.46661	0.978621	301	2	-0.40895
FBgn0002774	10	0.21045	0.39774	0.981802	238	3	-0.93165	0.26671	0.46901	0.978621	302	1	-0.93165
FBgn0031681	10	0.54947	0.69426	0.981802	437	1	-0.14248	0.2698	0.47243	0.978621	303	3	-0.14248
FBgn0028978	10	0.1423	0.31864	0.981802	184	2	0.037705	0.27072	0.47324	0.978621	304	3	0.037705
FBgn0035249	10	0.099758	0.24207	0.981802	138	3	-0.50369	0.27147	0.47395	0.978621	305	3	-0.50369
FBgn0034381	10	0.3187	0.52057	0.981802	313	2	0.20869	0.27304	0.47581	0.978621	306	3	0.20869
FBgn0039015	10	0.96899	0.96976	0.981802	605	0	-0.37395	0.27384	0.47661	0.978621	307	2	-0.37395
FBgn0030460	2	0.6903	0.69126	0.981802	480	0	0.27028	0.27985	0.2862	0.978621	308	1	0.27028
FBgn0036323	8	0.93789	0.9372	0.981802	560	0	-0.23368	0.28091	0.46494	0.978621	309	2	-0.23368
FBgn0035887	10	0.73958	0.80808	0.981802	497	1	-0.11601	0.28505	0.48829	0.978621	310	2	-0.11601
FBgn0015039	10	0.44339	0.62014	0.981802	374	2	-0.23765	0.28559	0.4889	0.978621	311	2	-0.23765
FBgn0041184	10	0.12005	0.27866	0.981802	160	2	-0.18806	0.28583	0.48916	0.978621	312	3	-0.18806
FBgn0025807	10	0.065533	0.17789	0.981802	92	2	-1.0635	0.28675	0.49022	0.978621	313	2	-1.0635
FBgn0038541	10	0.85612	0.86698	0.981802	551	1	-0.16931	0.28905	0.49277	0.978621	314	2	-0.16931
FBgn0040234	10	0.05241	0.15134	0.981802	76	4	-0.43047	0.28908	0.49278	0.978621	315	1	-0.43047
FBgn0038584	10	0.10301	0.24819	0.981802	142	2	0.13799	0.28966	0.49327	0.978621	316	2	0.13799
FBgn0000274	10	0.14046	0.31555	0.981802	183	3	-0.64019	0.2914	0.49533	0.978621	317	2	-0.64019
FBgn0037889	10	0.76389	0.81819	0.981802	511	1	-0.11068	0.29262	0.49677	0.978621	318	3	-0.11068
FBgn0034179	8	0.049884	0.13432	0.981802	72	3	-0.09644	0.29282	0.47402	0.978621	319	2	-0.09644
FBgn0031765	10	0.82572	0.84906	0.981802	536	1	0.16372	0.29371	0.49796	0.978621	320	3	0.16372
FBgn0052196	7	0.21317	0.36133	0.981802	241	2	-0.43313	0.29657	0.4504	0.978621	321	1	-0.43313
FBgn0030840	10	0.85404	0.8658	0.981802	549	1	0.087158	0.29716	0.50164	0.978621	322	2	0.087158
FBgn0038876	10	0.038312	0.12138	0.981802	63	3	-0.4848	0.29716	0.50164	0.978621	323	2	-0.4848
FBgn0027083	10	0.48479	0.6482	0.981802	396	1	-0.001219	0.30085	0.50551	0.978621	324	3	-0.001219
FBgn0033095	10	0.33792	0.54256	0.981802	322	2	0.30122	0.30135	0.50596	0.978621	325	3	0.30122
FBgn0010501	10	0.96899	0.96976	0.981802	628	0	0.22326	0.30289	0.50742	0.978621	326	3	0.22326
FBgn0019940	10	0.34505	0.55033	0.981802	327	2	-0.20391	0.30298	0.50755	0.978621	327	3	-0.20391
FBgn0029114	10	0.17379	0.35557	0.981802	214	3	-0.40209	0.3063	0.51092	0.978621	328	2	-0.40209
FBgn0265193	10	0.25891	0.45304	0.981802	283	1	0.15888	0.30818	0.51286	0.978621	329	3	0.15888
FBgn0259189	10	0.49808	0.65735	0.981802	403	2	-0.38878	0.30873	0.51344	0.978621	330	2	-0.38878
FBgn0039747	10	0.071732	0.18905	0.981802	103	4	-0.17012	0.31309	0.51817	0.978621	331	2	-0.17012
FBgn0030623	10	0.96899	0.96976	0.981802	588	0	-0.12874	0.3134	0.51851	0.978621	332	3	-0.12874
FBgn0260945	10	0.58188	0.71934	0.981802	453	1	-0.12179	0.31646	0.52193	0.978621	333	1	-0.12179
FBgn0085459	10	0.27028	0.46559	0.981802	288	1	-0.55227	0.3187	0.52443	0.978621	334	1	-0.55227
FBgn0034650	10	0.0013658	0.0070997	0.844194	4	4	0.044719	0.3191	0.52479	0.978621	335	3	0.044719
FBgn0038197	4	0.425	0.45057	0.981802	362	1	0.2394	0.32011	0.39174	0.978621	336	1	0.2394
FBgn0036671	10	0.8153	0.84301	0.981802	530	1	-0.28751	0.32292	0.52877	0.978621	337	3	-0.28751
FBgn0030234	10	0.51276	0.66808	0.981802	415	1	-0.44945	0.3241	0.53011	0.978621	338	3	-0.44945
FBgn0263235	10	0.020124	0.070211	0.981802	37	5	-0.89833	0.32595	0.53205	0.978621	339	2	-0.89833
FBgn0039049	10	0.96899	0.96976	0.981802	622	0	-0.61392	0.32626	0.53236	0.978621	340	3	-0.61392
FBgn0034858	10	0.50778	0.66465	0.981802	412	1	-0.34978	0.32721	0.53339	0.978621	341	3	-0.34978
FBgn0267435	10	0.96899	0.96976	0.981802	617	0	-0.20877	0.32759	0.53383	0.978621	342	2	-0.20877
FBgn0037325	10	0.96899	0.96976	0.981802	635	0	0.20559	0.32779	0.53408	0.978621	343	2	0.20559
FBgn0052333	10	0.4182	0.60376	0.981802	361	1	-0.71146	0.32924	0.5355	0.978621	344	2	-0.71146
FBgn0024326	10	0.071419	0.18857	0.981802	102	3	-0.18826	0.33025	0.53647	0.978621	345	2	-0.18826
FBgn0030956	10	0.21846	0.40723	0.981802	248	2	-1.0635	0.33089	0.5371	0.978621	346	2	-1.0635
FBgn0031875	10	0.96899	0.96976	0.981802	591	0	0.036973	0.33199	0.53821	0.978621	347	2	0.036973
FBgn0001217	10	0.19297	0.37744	0.981802	226	2	-0.46186	0.33309	0.53951	0.978621	348	2	-0.46186
FBgn0085384	10	0.33455	0.53862	0.981802	321	2	-0.55627	0.33363	0.54025	0.978621	349	2	-0.55627
FBgn0039043	10	0.12726	0.29221	0.981802	167	3	-0.71862	0.33455	0.54133	0.978621	350	2	-0.71862
FBgn0030679	10	0.44594	0.62194	0.981802	376	2	-1.0477	0.33746	0.54458	0.978621	351	3	-1.0477
FBgn0035533	10	0.22131	0.41025	0.981802	250	2	-0.65233	0.33823	0.54536	0.978621	352	2	-0.65233
FBgn0027794	10	0.96899	0.96976	0.981802	609	0	-0.18328	0.33918	0.54632	0.978621	353	3	-0.18328
FBgn0030293	10	0.059617	0.16608	0.981802	86	4	-0.46834	0.34072	0.54784	0.978621	354	1	-0.46834
FBgn0031995	10	0.85404	0.8658	0.981802	550	1	-0.6042	0.34343	0.55068	0.978621	355	3	-0.6042
FBgn0031830	10	0.14457	0.3213	0.981802	185	2	-0.6184	0.34436	0.55157	0.978621	356	2	-0.6184
FBgn0031461	10	0.8267	0.84962	0.981802	537	1	-0.0179	0.34681	0.5543	0.978621	357	2	-0.0179
FBgn0029870	10	0.96899	0.96976	0.981802	618	0	-0.076198	0.35071	0.55857	0.978621	358	3	-0.076198
FBgn0050428	10	0.23258	0.42296	0.981802	258	2	-0.71652	0.35171	0.55957	0.978621	359	2	-0.71652
FBgn0029067	10	0.29889	0.49829	0.981802	303	1	-0.22487	0.35359	0.5615	0.978621	360	3	-0.22487
FBgn0003140	10	0.49892	0.65794	0.981802	404	2	-0.63031	0.35363	0.56151	0.978621	361	2	-0.63031
FBgn0004895	10	0.4541	0.62747	0.981802	381	2	-0.032721	0.35363	0.56151	0.978621	362	2	-0.032721
FBgn0037536	10	0.74192	0.80903	0.981802	498	1	-0.13038	0.35415	0.56206	0.978621	363	3	-0.13038
FBgn0266111	10	0.1866	0.37012	0.981802	222	1	-0.84935	0.35782	0.56564	0.978621	364	2	-0.84935
FBgn0040391	10	0.0025215	0.012493	0.844194	8	6	-0.72848	0.35788	0.5657	0.978621	365	1	-0.72848
FBgn0033500	10	0.48826	0.65062	0.981802	399	1	0.036097	0.35793	0.56577	0.978621	366	3	0.036097
FBgn0032664	10	0.22383	0.41326	0.981802	252	2	-0.1147	0.35904	0.56706	0.978621	367	2	-0.1147
FBgn0039726	10	0.2486	0.44137	0.981802	275	2	-0.16248	0.36087	0.56878	0.978621	368	2	-0.16248
FBgn0039125	10	0.12461	0.28718	0.981802	162	2	-0.010597	0.36331	0.57113	0.978621	369	2	-0.010597
FBgn0029147	10	0.0025415	0.012601	0.844194	9	4	-0.97008	0.36371	0.57158	0.978621	370	3	-0.97008
FBgn0083961	10	0.17669	0.35871	0.981802	215	2	-0.94675	0.36421	0.57205	0.978621	371	2	-0.94675
FBgn0260634	10	0.96899	0.96976	0.981802	604	0	-0.059478	0.36468	0.57259	0.978621	372	3	-0.059478
FBgn0015277	10	0.96899	0.96976	0.981802	570	0	-0.50367	0.36526	0.57323	0.978621	373	2	-0.50367
FBgn0015586	10	0.75999	0.81647	0.981802	508	1	-0.14519	0.36575	0.57388	0.978621	374	2	-0.14519
FBgn0014141	10	0.0023653	0.011701	0.844194	7	2	-0.071001	0.36612	0.57427	0.978621	375	3	-0.071001
FBgn0260768	10	0.96899	0.96976	0.981802	636	0	-0.25577	0.36667	0.57475	0.978621	376	2	-0.25577
FBgn0016081	10	0.55937	0.70156	0.981802	445	2	-0.47435	0.36709	0.57519	0.978621	377	3	-0.47435
FBgn0010269	10	0.097275	0.23719	0.981802	134	2	-0.0086088	0.36757	0.57566	0.978621	378	3	-0.0086088
FBgn0030507	10	0.2437	0.43566	0.981802	269	1	0.030944	0.37062	0.57851	0.979715	379	2	0.030944
FBgn0260935	10	0.038008	0.12051	0.981802	62	2	-1.0635	0.37566	0.58386	0.985821	380	2	-1.0635
FBgn0034715	10	0.24186	0.43352	0.981802	267	1	-0.26239	0.3767	0.58514	0.985821	381	2	-0.26239
FBgn0030449	10	0.68241	0.7875	0.981802	475	1	-0.21098	0.38183	0.59073	0.98734	382	2	-0.21098
FBgn0033192	10	0.014364	0.053577	0.981802	25	2	-1.0635	0.3849	0.59421	0.98734	383	1	-1.0635
FBgn0039650	10	0.47458	0.64088	0.981802	390	2	-0.091832	0.38496	0.59426	0.98734	384	3	-0.091832
FBgn0033889	10	0.039812	0.12528	0.981802	64	3	-0.5591	0.38592	0.59528	0.98734	385	1	-0.5591
FBgn0003719	10	0.00019078	0.0012913	0.420968	2	6	-0.86679	0.38911	0.59872	0.98734	386	2	-0.86679
FBgn0033574	10	0.21761	0.4063	0.981802	247	3	0.11434	0.38979	0.59941	0.98734	387	3	0.11434
FBgn0033473	10	0.20477	0.39117	0.981802	235	1	-0.07963	0.392	0.60185	0.98734	388	3	-0.07963
FBgn0039622	10	0.77423	0.82268	0.981802	512	1	-0.096711	0.39317	0.60302	0.98734	389	3	-0.096711
FBgn0025469	10	0.79255	0.83128	0.981802	519	1	-0.0095039	0.39424	0.60403	0.98734	390	2	-0.0095039
FBgn0015765	10	0.53869	0.68649	0.981802	430	2	-0.72541	0.39602	0.60603	0.98734	391	1	-0.72541
FBgn0267033	8	0.24425	0.41842	0.981802	270	2	-0.01454	0.39646	0.55482	0.978621	392	1	-0.01454
FBgn0039188	10	0.67674	0.78579	0.981802	472	1	-0.54516	0.39655	0.60653	0.98734	393	3	-0.54516
FBgn0022800	10	0.015412	0.056516	0.981802	29	3	-1.0635	0.39702	0.60704	0.98734	394	2	-1.0635
FBgn0038279	10	0.80248	0.83631	0.981802	523	1	-0.25364	0.39845	0.60852	0.98734	395	2	-0.25364
FBgn0053116	7	0.51817	0.621	0.981802	420	1	-1.0635	0.39905	0.54315	0.978621	396	1	-1.0635
FBgn0032650	10	0.96899	0.96976	0.981802	574	0	-0.3485	0.40211	0.612	0.98734	397	3	-0.3485
FBgn0037855	10	0.040292	0.1265	0.981802	66	3	-0.23388	0.40211	0.612	0.98734	398	3	-0.23388
FBgn0040370	10	0.40052	0.5919	0.981802	351	1	-0.027736	0.40326	0.61314	0.98734	399	2	-0.027736
FBgn0034142	6	0.87559	0.87566	0.981802	555	0	-0.61441	0.40461	0.54334	0.978621	400	1	-0.61441
FBgn0031610	10	0.68965	0.78998	0.981802	479	1	-0.25584	0.40647	0.61518	0.98734	401	2	-0.25584
FBgn0031869	10	0.68325	0.7878	0.981802	476	1	-0.47501	0.40991	0.61722	0.98734	402	1	-0.47501
FBgn0031183	10	0.67845	0.78635	0.981802	474	1	-0.27888	0.41224	0.61852	0.98734	403	2	-0.27888
FBgn0035742	10	0.057869	0.16271	0.981802	83	4	-1.0635	0.41285	0.61893	0.98734	404	1	-1.0635
FBgn0037880	10	0.16185	0.34183	0.981802	208	3	-0.52281	0.41642	0.62101	0.98734	405	2	-0.52281
FBgn0025549	10	0.96899	0.96976	0.981802	623	0	0.067107	0.41772	0.62181	0.98734	406	2	0.067107
FBgn0041191	10	0.049245	0.14495	0.981802	71	3	-0.66427	0.42352	0.62531	0.988401	407	1	-0.66427
FBgn0030710	10	0.96899	0.96976	0.981802	586	0	-0.28689	0.42735	0.62742	0.988401	408	2	-0.28689
FBgn0000565	10	0.78849	0.82927	0.981802	518	1	-0.060154	0.43116	0.62952	0.988401	409	2	-0.060154
FBgn0023023	10	0.19053	0.37479	0.981802	223	1	-0.030662	0.43302	0.63068	0.988401	410	2	-0.030662
FBgn0033115	10	0.14842	0.32598	0.981802	189	3	-0.43954	0.43401	0.6312	0.988401	411	2	-0.43954
FBgn0032187	10	0.84471	0.85978	0.981802	547	1	-0.53082	0.43714	0.63304	0.988401	412	2	-0.53082
FBgn0035059	10	0.082044	0.20896	0.981802	116	3	-0.34572	0.43802	0.63367	0.988401	413	2	-0.34572
FBgn0031006	2	0.89111	0.89195	0.981802	556	0	0.21029	0.44051	0.4399	0.978621	414	0	0.21029
FBgn0051852	10	0.43919	0.61744	0.981802	369	1	-0.23298	0.44293	0.63656	0.98929	415	2	-0.23298
FBgn0014135	10	0.084611	0.21357	0.981802	120	2	0.23646	0.44757	0.63945	0.98929	416	2	0.23646
FBgn0042710	10	0.26665	0.4614	0.981802	285	2	-0.21661	0.45172	0.64185	0.98929	417	1	-0.21661
FBgn0000384	10	0.059138	0.16516	0.981802	84	2	-0.50942	0.45447	0.64361	0.98929	418	1	-0.50942
FBgn0010808	10	0.044717	0.1362	0.981802	69	3	-0.69618	0.45526	0.64417	0.98929	419	2	-0.69618
FBgn0036962	10	0.068033	0.18249	0.981802	96	4	-1.0151	0.4563	0.64478	0.98929	420	2	-1.0151
FBgn0266696	10	0.34436	0.54939	0.981802	326	2	-0.015489	0.45643	0.64486	0.98929	421	2	-0.015489
FBgn0266347	9	0.085463	0.21048	0.981802	121	3	-0.71526	0.46244	0.62239	0.98734	422	2	-0.71526
FBgn0030518	10	0.96899	0.96976	0.981802	613	0	0.012631	0.46654	0.65072	0.993683	423	2	0.012631
FBgn0024332	8	0.74871	0.76927	0.981802	500	1	-0.93012	0.46796	0.61371	0.98734	424	1	-0.93012
FBgn0033272	10	0.33332	0.53713	0.981802	320	2	-0.42742	0.4725	0.65409	0.993683	425	1	-0.42742
FBgn0036398	10	0.76129	0.817	0.981802	509	1	-0.54686	0.47601	0.6564	0.993683	426	2	-0.54686
FBgn0034363	10	0.011776	0.046077	0.981802	22	3	-1.0635	0.47658	0.65686	0.993683	427	2	-1.0635
FBgn0052311	10	0.15903	0.33844	0.981802	204	2	-0.13739	0.4778	0.65775	0.993683	428	2	-0.13739
FBgn0003028	10	0.13329	0.30339	0.981802	174	3	-0.62743	0.4778	0.65775	0.993683	429	1	-0.62743
FBgn0010389	10	0.96899	0.96976	0.981802	596	0	0.073775	0.47886	0.65843	0.993683	430	2	0.073775
FBgn0005198	3	0.29302	0.31757	0.981802	301	1	-0.7292	0.47977	0.48048	0.978621	431	1	-0.7292
FBgn0036932	10	0.79503	0.83264	0.981802	520	1	-0.21198	0.48566	0.66254	0.993683	432	1	-0.21198
FBgn0039782	10	0.96899	0.96976	0.981802	610	0	-0.21055	0.48653	0.66305	0.993683	433	1	-0.21055
FBgn0038016	10	0.031893	0.1032	0.981802	55	2	-0.17678	0.48851	0.66422	0.993683	434	2	-0.17678
FBgn0039305	10	0.043999	0.13471	0.981802	68	4	-0.2977	0.4933	0.66699	0.993683	435	2	-0.2977
FBgn0028988	10	0.082044	0.20896	0.981802	117	3	-0.33454	0.49427	0.6676	0.993683	436	2	-0.33454
FBgn0051826	10	0.25589	0.44943	0.981802	281	1	-1.0635	0.49808	0.67026	0.993683	437	2	-1.0635
FBgn0029840	10	0.96899	0.96976	0.981802	601	0	0.043888	0.50143	0.67268	0.993683	438	2	0.043888
FBgn0002773	10	0.1144	0.26868	0.981802	152	2	-0.2347	0.50275	0.67351	0.993683	439	1	-0.2347
FBgn0030850	10	0.17745	0.35964	0.981802	217	3	-1.0386	0.50778	0.67687	0.993683	440	1	-1.0386
FBgn0031420	10	0.15459	0.33325	0.981802	200	2	-0.30217	0.51199	0.67942	0.993683	441	2	-0.30217
FBgn0042711	10	0.080705	0.20627	0.981802	114	4	-0.3454	0.51524	0.6815	0.993683	442	2	-0.3454
FBgn0038830	10	0.057869	0.16271	0.981802	82	4	-0.99891	0.51933	0.6843	0.993683	443	1	-0.99891
FBgn0026136	10	0.0037929	0.017569	0.911414	12	5	-0.86737	0.523	0.68672	0.993683	444	1	-0.86737
FBgn0031972	10	0.053811	0.15448	0.981802	79	4	-0.81391	0.52434	0.68769	0.993683	445	2	-0.81391
FBgn0265089	10	0.46798	0.63646	0.981802	386	2	-0.53817	0.52625	0.68894	0.993683	446	2	-0.53817
FBgn0028902	10	0.68465	0.78824	0.981802	477	1	0.045683	0.52744	0.68963	0.993683	447	2	0.045683
FBgn0037657	10	0.21752	0.4062	0.981802	246	1	-1.0635	0.53168	0.69231	0.993683	448	2	-1.0635
FBgn0031042	10	0.21283	0.40065	0.981802	240	3	-0.016177	0.53276	0.69291	0.993683	449	2	-0.016177
FBgn0036187	10	0.96899	0.96976	0.981802	611	0	-0.43533	0.537	0.69576	0.993683	450	2	-0.43533
FBgn0283499	10	0.48398	0.64761	0.981802	395	2	-0.44987	0.53779	0.69626	0.993683	451	2	-0.44987
FBgn0030559	10	0.16468	0.34541	0.981802	210	2	-0.74848	0.53897	0.69697	0.993683	452	1	-0.74848
FBgn0033020	5	0.59264	0.60633	0.981802	455	1	-0.87268	0.53925	0.57637	0.978621	453	1	-0.87268
FBgn0022213	10	0.14843	0.326	0.981802	190	2	-0.15087	0.54638	0.70176	0.993683	454	2	-0.15087
FBgn0034317	10	0.050992	0.14854	0.981802	74	2	-0.75886	0.55063	0.70451	0.993683	455	2	-0.75886
FBgn0030716	10	0.49127	0.65256	0.981802	402	1	-0.61452	0.5557	0.7078	0.993683	456	2	-0.61452
FBgn0003132	10	0.36118	0.56651	0.981802	331	2	-0.61005	0.55712	0.70885	0.993683	457	1	-0.61005
FBgn0261560	10	0.11833	0.27545	0.981802	158	3	-0.86233	0.55832	0.70965	0.993683	458	2	-0.86233
FBgn0028847	10	0.21906	0.40791	0.981802	249	3	-1.0635	0.5624	0.71237	0.993683	459	2	-1.0635
FBgn0266084	10	0.0055111	0.024584	0.981802	16	3	-0.18763	0.56355	0.71315	0.993683	460	2	-0.18763
FBgn0038247	10	0.34072	0.5455	0.981802	325	2	-0.18894	0.56459	0.71398	0.993683	461	2	-0.18894
FBgn0039797	10	0.050134	0.14682	0.981802	73	3	-0.43179	0.56615	0.71514	0.993683	462	2	-0.43179
FBgn0051902	10	0.65406	0.77617	0.981802	466	1	-0.40437	0.57058	0.71859	0.993683	463	2	-0.40437
FBgn0262866	9	0.69125	0.75951	0.981802	481	1	-1.0635	0.57067	0.70456	0.993683	464	2	-1.0635
FBgn0042712	10	0.63381	0.76022	0.981802	464	1	-0.2615	0.57132	0.71901	0.993683	465	2	-0.2615
FBgn0039270	10	0.013292	0.050579	0.981802	24	3	-0.5735	0.57672	0.72262	0.993683	466	2	-0.5735
FBgn0038167	10	0.32869	0.53185	0.981802	317	2	-1.0635	0.57717	0.72293	0.993683	467	1	-1.0635
FBgn0028562	10	0.27983	0.47611	0.981802	293	2	-0.85053	0.5779	0.72334	0.993683	468	1	-0.85053
FBgn0016794	9	0.95612	0.95513	0.981802	563	0	-0.00025287	0.58007	0.71164	0.993683	469	2	-0.00025287
FBgn0015008	10	0.49895	0.65795	0.981802	406	1	-0.59732	0.58152	0.72633	0.993683	470	1	-0.59732
FBgn0003091	10	0.96899	0.96976	0.981802	575	0	-0.13292	0.58224	0.72686	0.993683	471	1	-0.13292
FBgn0265267	10	0.68577	0.78868	0.981802	478	1	-0.62319	0.58461	0.72861	0.993683	472	2	-0.62319
FBgn0050268	10	0.083413	0.21139	0.981802	119	4	-1.0006	0.58511	0.7289	0.993683	473	1	-1.0006
FBgn0003356	10	0.16576	0.34646	0.981802	211	3	-0.33216	0.58562	0.72916	0.993683	474	2	-0.33216
FBgn0034936	10	0.022825	0.078295	0.981802	42	3	-0.26241	0.59079	0.73276	0.993683	475	1	-0.26241
FBgn0036480	7	0.11191	0.23174	0.981802	150	2	-1.0635	0.5948	0.67623	0.993683	476	1	-1.0635
FBgn0004050	10	0.017335	0.062265	0.981802	33	3	-0.85635	0.6031	0.74085	0.993683	477	2	-0.85635
FBgn0032749	10	0.031057	0.10085	0.981802	53	2	-1.0635	0.6047	0.74238	0.993683	478	1	-1.0635
FBgn0034789	10	0.36158	0.56676	0.981802	332	2	-0.41854	0.60811	0.74445	0.993683	479	1	-0.41854
FBgn0017561	10	0.74355	0.80969	0.981802	499	1	-0.63174	0.61482	0.74939	0.993683	480	2	-0.63174
FBgn0035709	10	0.50589	0.66314	0.981802	410	2	-0.53665	0.61579	0.75011	0.993683	481	2	-0.53665
FBgn0038870	10	0.25596	0.4495	0.981802	282	2	-0.27975	0.61619	0.75042	0.993683	482	1	-0.27975
FBgn0020258	10	0.086054	0.21619	0.981802	123	4	-0.83102	0.61627	0.75049	0.993683	483	2	-0.83102
FBgn0261524	9	0.2671	0.45402	0.981802	286	1	-0.29095	0.61865	0.74258	0.993683	484	1	-0.29095
FBgn0263076	10	0.10302	0.24819	0.981802	143	3	-0.28253	0.62017	0.75317	0.993683	485	1	-0.28253
FBgn0021796	10	0.96899	0.96976	0.981802	641	0	-0.25569	0.62252	0.75485	0.993683	486	2	-0.25569
FBgn0030680	10	0.12845	0.29441	0.981802	168	2	-0.23945	0.63036	0.76061	0.993683	487	2	-0.23945
FBgn0052105	10	0.0026407	0.012948	0.844194	10	4	-0.4631	0.63093	0.7611	0.993683	488	1	-0.4631
FBgn0032381	10	0.079283	0.20361	0.981802	112	2	-0.227	0.63093	0.7611	0.993683	489	2	-0.227
FBgn0052633	10	0.72265	0.8015	0.981802	492	1	-0.10102	0.63093	0.7611	0.993683	490	1	-0.10102
FBgn0020621	10	0.081354	0.20768	0.981802	115	3	-0.11111	0.63341	0.76315	0.993683	491	2	-0.11111
FBgn0015279	9	0.41688	0.57678	0.981802	360	1	-0.46313	0.6348	0.7558	0.993683	492	2	-0.46313
FBgn0001108	10	0.82041	0.84598	0.981802	534	1	-1.0635	0.63972	0.7676	0.993683	493	2	-1.0635
FBgn0037625	10	0.037312	0.11848	0.981802	61	4	-0.30148	0.6418	0.76903	0.993683	494	2	-0.30148
FBgn0033860	10	0.23591	0.42696	0.981802	264	2	-0.43894	0.64226	0.76946	0.993683	495	2	-0.43894
FBgn0015296	10	0.77995	0.82523	0.981802	514	1	-0.069059	0.64266	0.76974	0.993683	496	1	-0.069059
FBgn0013672	10	0.097566	0.23779	0.981802	135	2	-1.0105	0.64503	0.77153	0.993683	497	2	-1.0105
FBgn0264078	10	0.064079	0.17484	0.981802	90	3	0.11185	0.65505	0.77884	0.993683	498	2	0.11185
FBgn0035703	10	0.11676	0.27262	0.981802	154	3	-0.41623	0.65919	0.78187	0.993683	499	1	-0.41623
FBgn0036274	10	0.045101	0.13694	0.981802	70	4	-1.0635	0.66039	0.78279	0.993683	500	1	-1.0635
FBgn0030992	10	0.27856	0.47476	0.981802	291	1	-0.015976	0.66158	0.78359	0.993683	501	1	-0.015976
FBgn0024996	10	0.96899	0.96976	0.981802	597	0	-0.21574	0.66217	0.78404	0.993683	502	1	-0.21574
FBgn0003731	10	0.1509	0.32883	0.981802	195	3	-0.69002	0.6669	0.78749	0.993683	503	1	-0.69002
FBgn0050156	10	0.83499	0.85405	0.981802	542	1	-0.1651	0.66842	0.78853	0.993683	504	2	-0.1651
FBgn0050424	5	0.6196	0.62788	0.981802	461	1	-0.30537	0.66859	0.67259	0.993683	505	1	-0.30537
FBgn0050429	10	0.34742	0.55314	0.981802	329	2	-0.51793	0.67149	0.79093	0.993683	506	2	-0.51793
FBgn0032717	10	0.75955	0.81622	0.981802	507	1	-0.38757	0.67346	0.79252	0.993683	507	2	-0.38757
FBgn0000489	10	0.25322	0.4467	0.981802	278	2	-0.60204	0.67476	0.79353	0.993683	508	2	-0.60204
FBgn0021742	10	0.036751	0.11698	0.981802	60	4	-0.50778	0.67476	0.79353	0.993683	509	2	-0.50778
FBgn0034187	10	0.96899	0.96976	0.981802	580	0	-0.22634	0.67503	0.79368	0.993683	510	1	-0.22634
FBgn0050438	10	0.62867	0.75559	0.981802	463	1	-1.0453	0.67674	0.79522	0.993683	511	1	-1.0453
FBgn0262733	10	0.19313	0.37756	0.981802	228	2	-0.72856	0.67757	0.79583	0.993683	512	2	-0.72856
FBgn0038721	10	0.54171	0.68871	0.981802	433	1	-1.0564	0.6793	0.79707	0.993683	513	2	-1.0564
FBgn0264895	8	0.51811	0.65442	0.981802	419	1	0.030206	0.67931	0.74667	0.993683	514	1	0.030206
FBgn0053506	10	0.96899	0.96976	0.981802	643	0	0.024814	0.67959	0.7973	0.993683	515	1	0.024814
FBgn0031441	10	0.13332	0.30344	0.981802	176	1	0.20845	0.68187	0.79915	0.993683	516	2	0.20845
FBgn0037248	10	0.96899	0.96976	0.981802	639	0	-1.0635	0.6823	0.79938	0.993683	517	2	-1.0635
FBgn0030805	4	0.50321	0.51238	0.981802	408	1	-0.81462	0.68326	0.68298	0.993683	518	0	-0.81462
FBgn0036428	10	0.074887	0.19493	0.981802	107	3	-0.91489	0.68592	0.80229	0.993683	519	2	-0.91489
FBgn0033397	10	0.15129	0.32942	0.981802	196	3	-0.82764	0.6874	0.80338	0.993683	520	2	-0.82764
FBgn0032304	10	0.0069538	0.030284	0.981802	18	4	-0.71316	0.68827	0.80404	0.993683	521	1	-0.71316
FBgn0264075	9	0.18634	0.35329	0.981802	221	1	-0.73009	0.69025	0.77674	0.993683	522	1	-0.73009
FBgn0023197	10	0.10121	0.24484	0.981802	140	3	-0.99172	0.69074	0.80598	0.993683	523	1	-0.99172
FBgn0033733	10	0.73532	0.80636	0.981802	496	1	-0.34315	0.69287	0.80771	0.993683	524	2	-0.34315
FBgn0033935	10	0.96899	0.96976	0.981802	572	0	-0.13002	0.6937	0.80831	0.993683	525	2	-0.13002
FBgn0025115	10	0.0051082	0.022823	0.981802	15	3	-1.0635	0.69834	0.81192	0.993683	526	1	-1.0635
FBgn0033706	9	0.30757	0.4977	0.981802	307	2	-1.0635	0.70808	0.78365	0.993683	527	1	-1.0635
FBgn0263987	5	0.42943	0.49443	0.981802	364	1	0.081605	0.7121	0.71252	0.993683	528	1	0.081605
FBgn0029722	10	0.51088	0.66667	0.981802	413	2	-0.88398	0.72165	0.81902	0.993683	529	1	-0.88398
FBgn0024542	10	0.076777	0.19863	0.981802	109	2	-0.6351	0.73051	0.82174	0.993683	530	1	-0.6351
FBgn0015269	10	0.47772	0.64343	0.981802	392	2	-0.71048	0.73958	0.82479	0.993683	531	1	-0.71048
FBgn0010395	10	0.52421	0.6763	0.981802	424	2	-0.68435	0.74471	0.82659	0.993683	532	1	-0.68435
FBgn0037370	8	0.19713	0.36302	0.981802	231	2	-0.058018	0.74682	0.77976	0.993683	533	1	-0.058018
FBgn0260779	10	0.38094	0.57912	0.981802	342	2	-0.67646	0.74792	0.82761	0.993683	534	1	-0.67646
FBgn0046332	10	0.83961	0.85682	0.981802	544	1	-0.56357	0.752	0.82915	0.993683	535	1	-0.56357
FBgn0017572	10	0.338	0.54265	0.981802	323	1	-0.16701	0.75245	0.82925	0.993683	536	1	-0.16701
FBgn0036206	10	0.33089	0.53411	0.981802	318	1	-0.78217	0.76774	0.83491	0.993683	537	1	-0.78217
FBgn0039357	10	0.11723	0.27339	0.981802	155	1	-1.0635	0.76858	0.83518	0.993683	538	1	-1.0635
FBgn0003448	10	0.034277	0.10995	0.981802	57	3	-0.32323	0.77236	0.83648	0.993683	539	1	-0.32323
FBgn0039623	10	0.015177	0.055794	0.981802	28	4	-0.80151	0.77278	0.83663	0.993683	540	1	-0.80151
FBgn0035983	10	0.36526	0.56923	0.981802	336	1	-0.083115	0.77608	0.83794	0.993683	541	1	-0.083115
FBgn0032042	10	0.18217	0.36487	0.981802	220	3	-0.85007	0.77975	0.83929	0.993683	542	1	-0.85007
FBgn0027492	10	0.96899	0.96976	0.981802	579	0	-1.0635	0.78217	0.84016	0.993683	543	1	-1.0635
FBgn0029131	7	0.99166	0.99185	0.999807	645	0	-0.10991	0.78234	0.78807	0.993683	544	1	-0.10991
FBgn0051719	6	0.87559	0.87566	0.981802	553	0	-0.13504	0.79475	0.7943	0.993683	545	0	-0.13504
FBgn0001250	10	0.1573	0.3362	0.981802	201	3	-0.64392	0.79541	0.84587	0.993683	546	1	-0.64392
FBgn0014859	10	0.12636	0.29063	0.981802	165	2	-0.90892	0.79916	0.84739	0.993683	547	1	-0.90892
FBgn0020622	10	0.14046	0.31555	0.981802	182	2	-0.71749	0.80827	0.85138	0.993683	548	1	-0.71749
FBgn0035627	10	0.094391	0.23205	0.981802	131	2	-0.67493	0.81111	0.85261	0.993683	549	1	-0.67493
FBgn0039209	10	0.58867	0.72444	0.981802	454	1	-0.04464	0.81252	0.85313	0.993683	550	1	-0.04464
FBgn0030425	10	0.54093	0.68818	0.981802	432	1	-0.075169	0.81356	0.85362	0.993683	551	1	-0.075169
FBgn0032820	10	0.82752	0.85013	0.981802	540	1	-0.97419	0.81973	0.85661	0.993683	552	1	-0.97419
FBgn0031187	10	0.45236	0.62629	0.981802	380	2	-0.7792	0.82507	0.85945	0.993683	553	1	-0.7792
FBgn0040377	10	0.75801	0.81554	0.981802	506	1	-0.052436	0.83655	0.86472	0.993683	554	1	-0.052436
FBgn0031214	10	0.067622	0.18176	0.981802	95	4	-0.9704	0.84007	0.86642	0.993683	555	1	-0.9704
FBgn0038598	10	0.06375	0.17414	0.981802	89	4	-0.6725	0.8453	0.8691	0.993683	556	1	-0.6725
FBgn0037826	8	0.11737	0.25029	0.981802	156	3	-1.0093	0.84711	0.84871	0.993683	557	1	-1.0093
FBgn0259146	10	0.11015	0.26102	0.981802	148	2	-0.73194	0.84763	0.87042	0.993683	558	1	-0.73194
FBgn0034964	10	0.10158	0.24557	0.981802	141	3	-0.63229	0.84879	0.87107	0.993683	559	1	-0.63229
FBgn0260645	9	0.45777	0.60799	0.981802	383	1	-0.30435	0.84934	0.8556	0.993683	560	1	-0.30435
FBgn0034491	10	0.44828	0.62331	0.981802	377	2	-0.58823	0.8508	0.87207	0.993683	561	1	-0.58823
FBgn0267912	10	0.028897	0.094919	0.981802	50	4	-1.0513	0.85222	0.87293	0.993683	562	1	-1.0513
FBgn0000382	10	0.23104	0.42125	0.981802	257	3	0.11407	0.85348	0.87364	0.993683	563	1	0.11407
FBgn0032405	10	0.27584	0.47188	0.981802	290	2	-0.71355	0.85777	0.87585	0.993683	564	1	-0.71355
FBgn0031462	10	0.43626	0.61537	0.981802	367	2	-0.34959	0.86074	0.87744	0.993683	565	1	-0.34959
FBgn0037592	10	0.36575	0.56959	0.981802	337	2	-0.16705	0.86207	0.87806	0.993683	566	1	-0.16705
FBgn0035496	10	0.074711	0.19468	0.981802	106	2	-1.0635	0.8634	0.87887	0.993683	567	1	-1.0635
FBgn0267487	10	0.22257	0.41182	0.981802	251	2	-1.0635	0.86418	0.87925	0.993683	568	1	-1.0635
FBgn0025632	10	0.25421	0.44776	0.981802	279	3	-0.49628	0.86497	0.87969	0.993683	569	1	-0.49628
FBgn0261832	10	0.71611	0.79934	0.981802	489	1	-0.64272	0.86549	0.88008	0.993683	570	1	-0.64272
FBgn0062412	10	0.21398	0.40198	0.981802	242	2	-0.75764	0.86729	0.88103	0.993683	571	1	-0.75764
FBgn0036096	10	0.16042	0.34011	0.981802	205	3	-0.72991	0.86755	0.88124	0.993683	572	1	-0.72991
FBgn0030305	10	0.47372	0.64028	0.981802	388	2	-0.081826	0.87134	0.884	0.993683	573	1	-0.081826
FBgn0027342	10	0.30289	0.50251	0.981802	305	2	-0.16416	0.87283	0.88492	0.993683	574	1	-0.16416
FBgn0035336	10	0.094201	0.23165	0.981802	130	3	-0.6656	0.87356	0.88535	0.993683	575	1	-0.6656
FBgn0041789	10	0.48738	0.64992	0.981802	398	2	-0.40679	0.87515	0.88621	0.993683	576	1	-0.40679
FBgn0038921	10	0.82142	0.8465	0.981802	535	1	-0.11441	0.876	0.88674	0.993683	577	1	-0.11441
FBgn0027620	10	0.051203	0.14893	0.981802	75	4	-0.50538	0.87767	0.88794	0.993683	578	1	-0.50538
FBgn0039044	10	0.44067	0.61835	0.981802	370	2	-0.50819	0.88143	0.89039	0.993683	579	1	-0.50819
FBgn0016930	10	0.81564	0.8432	0.981802	531	1	-0.74239	0.88464	0.89252	0.993683	580	1	-0.74239
FBgn0040001	10	0.069454	0.18491	0.981802	99	4	-0.7982	0.88554	0.89293	0.993683	581	1	-0.7982
FBgn0283442	10	0.96899	0.96976	0.981802	627	0	-0.292	0.88995	0.89621	0.993683	582	1	-0.292
FBgn0263600	10	0.85831	0.8686	0.981802	552	1	-0.24068	0.89038	0.89649	0.993683	583	1	-0.24068
FBgn0265784	10	0.43495	0.61455	0.981802	366	2	-0.28439	0.89156	0.89739	0.993683	584	1	-0.28439
FBgn0040297	10	0.19703	0.38205	0.981802	230	2	-0.14509	0.89315	0.89848	0.993683	585	1	-0.14509
FBgn0051624	7	0.10884	0.22672	0.981802	147	2	-1.0352	0.89429	0.89416	0.993683	586	0	-1.0352
FBgn0038979	10	0.15065	0.32852	0.981802	194	3	-0.25955	0.89607	0.90055	0.993683	587	1	-0.25955
FBgn0261854	8	0.12494	0.26116	0.981802	163	2	-0.046119	0.89729	0.89705	0.993683	588	0	-0.046119
FBgn0010316	7	0.57265	0.64767	0.981802	450	1	-0.1913	0.89856	0.89865	0.993683	589	0	-0.1913
FBgn0038448	10	0.37397	0.57477	0.981802	340	2	0.041506	0.9009	0.90415	0.993683	590	1	0.041506
FBgn0028427	10	0.21244	0.40024	0.981802	239	1	-0.24369	0.90247	0.90536	0.993683	591	1	-0.24369
FBgn0000259	9	0.17745	0.34235	0.981802	216	2	-0.22804	0.90431	0.902	0.993683	592	0	-0.22804
FBgn0035604	10	0.21456	0.40267	0.981802	243	3	-0.54827	0.90497	0.90735	0.993683	593	1	-0.54827
FBgn0000289	10	0.23258	0.42296	0.981802	259	2	-0.97208	0.90553	0.90774	0.993683	594	1	-0.97208
FBgn0283649	10	0.059223	0.16533	0.981802	85	3	-0.82214	0.90796	0.90988	0.993683	595	1	-0.82214
FBgn0036862	10	0.49895	0.65795	0.981802	405	2	-0.5181	0.90924	0.91092	0.993683	596	1	-0.5181
FBgn0024811	10	0.48398	0.64761	0.981802	394	2	-0.96301	0.91069	0.91208	0.993683	597	1	-0.96301
FBgn0001974	5	0.026593	0.066846	0.981802	47	3	-0.84438	0.91083	0.91081	0.993683	598	0	-0.84438
FBgn0030686	10	0.13845	0.31219	0.981802	180	3	-0.55634	0.91158	0.91291	0.993683	599	1	-0.55634
FBgn0263656	10	0.51199	0.66749	0.981802	414	2	-0.20218	0.91473	0.91545	0.994681	600	1	-0.20218
FBgn0038331	10	0.7204	0.80084	0.981802	491	1	-0.79742	0.91661	0.91688	0.994681	601	1	-0.79742
FBgn0032235	10	0.10873	0.2585	0.981802	146	2	-0.85921	0.91811	0.91852	0.994739	602	1	-0.85921
FBgn0086358	10	0.96899	0.96976	0.981802	603	0	-0.86802	0.9196	0.92001	0.994739	603	1	-0.86802
FBgn0026379	10	0.17827	0.3606	0.981802	218	3	-0.083068	0.92304	0.92337	0.994739	604	1	-0.083068
FBgn0036018	10	0.41045	0.59846	0.981802	356	2	-0.73006	0.92552	0.92562	0.994739	605	0	-0.73006
FBgn0030844	10	0.10316	0.24846	0.981802	144	3	-0.27853	0.92627	0.92629	0.994739	606	0	-0.27853
FBgn0011826	10	0.55178	0.69586	0.981802	439	1	-0.20472	0.92665	0.92668	0.994739	607	0	-0.20472
FBgn0031533	10	0.47604	0.64206	0.981802	391	1	-0.71397	0.93118	0.93127	0.994739	608	0	-0.71397
FBgn0004638	10	0.13678	0.30928	0.981802	178	2	-1.0635	0.93273	0.93302	0.994739	609	0	-1.0635
FBgn0262081	10	0.096098	0.23506	0.981802	133	2	-1.0635	0.93822	0.93865	0.994739	610	0	-1.0635
FBgn0015300	10	0.095122	0.23335	0.981802	132	3	-0.7883	0.93911	0.93967	0.994739	611	0	-0.7883
FBgn0014366	10	0.092641	0.22874	0.981802	128	3	-0.53081	0.94075	0.9413	0.994739	612	0	-0.53081
FBgn0036039	10	0.38911	0.58467	0.981802	345	2	-0.6644	0.94149	0.94206	0.994739	613	0	-0.6644
FBgn0036282	8	0.56376	0.67864	0.981802	447	1	-1.0635	0.94204	0.94115	0.994739	614	0	-1.0635
FBgn0259977	10	0.030358	0.098976	0.981802	52	4	-0.87755	0.94222	0.94305	0.994739	615	0	-0.87755
FBgn0266064	10	0.96899	0.96976	0.981802	630	0	-0.7424	0.94246	0.94328	0.994739	616	0	-0.7424
FBgn0030812	10	0.021107	0.073041	0.981802	41	2	-0.11462	0.94401	0.94463	0.994739	617	0	-0.11462
FBgn0000560	10	0.53184	0.68164	0.981802	427	1	-0.086072	0.94448	0.94515	0.994739	618	0	-0.086072
FBgn0283472	10	0.0001331	0.0009054	0.420968	1	7	-1.3005	0.9446	0.94531	0.994739	619	0	-1.3005
FBgn0035082	10	0.69239	0.79097	0.981802	482	1	-0.65842	0.94877	0.9492	0.994739	620	0	-0.65842
FBgn0031126	10	0.042837	0.13239	0.981802	67	4	-1.0635	0.94888	0.94933	0.994739	621	0	-1.0635
FBgn0030789	8	0.38087	0.53095	0.981802	341	1	-0.64603	0.95012	0.94967	0.994739	622	0	-0.64603
FBgn0037672	10	0.22656	0.41626	0.981802	253	2	-0.5101	0.95336	0.95385	0.994739	623	0	-0.5101
FBgn0037039	10	0.23833	0.42937	0.981802	266	2	-0.90076	0.95566	0.95618	0.994739	624	0	-0.90076
FBgn0250819	10	0.56014	0.70214	0.981802	446	1	-0.27884	0.95854	0.95908	0.994739	625	0	-0.27884
FBgn0036165	9	0.030133	0.094761	0.981802	51	2	-0.30807	0.95932	0.95823	0.994739	626	0	-0.30807
FBgn0270924	10	0.52897	0.67958	0.981802	426	2	-0.62996	0.95974	0.96038	0.994739	627	0	-0.62996
FBgn0026323	10	0.55253	0.69644	0.981802	440	2	-1.0325	0.9609	0.96154	0.994739	628	0	-1.0325
FBgn0033113	10	0.24649	0.43892	0.981802	273	3	-0.56382	0.96237	0.96305	0.994739	629	0	-0.56382
FBgn0038890	10	0.28905	0.48697	0.981802	297	2	-0.5515	0.96438	0.96507	0.994739	630	0	-0.5515
FBgn0020299	10	0.19444	0.37892	0.981802	229	2	-0.3827	0.96562	0.96633	0.994739	631	0	-0.3827
FBgn0051199	10	0.40086	0.59204	0.981802	352	2	-1.0529	0.9684	0.969	0.994739	632	0	-1.0529
FBgn0035483	10	0.020348	0.070933	0.981802	39	5	-0.73596	0.96861	0.96925	0.994739	633	0	-0.73596
FBgn0039277	10	0.0020372	0.010246	0.844194	6	6	-1.0508	0.97091	0.97153	0.994739	634	0	-1.0508
FBgn0259228	10	0.73026	0.80432	0.981802	493	1	-0.45486	0.97461	0.97518	0.994739	635	0	-0.45486
FBgn0026317	10	0.15188	0.33015	0.981802	197	2	-0.44523	0.97577	0.97644	0.994739	636	0	-0.44523
FBgn0032499	10	0.69942	0.79352	0.981802	484	1	-0.25737	0.97618	0.97686	0.994739	637	0	-0.25737
FBgn0053096	10	0.099758	0.24207	0.981802	137	3	-0.32353	0.97643	0.97711	0.994739	638	0	-0.32353
FBgn0039098	10	0.53922	0.68685	0.981802	431	2	-0.19384	0.97715	0.97785	0.994739	639	0	-0.19384
FBgn0002413	10	0.23349	0.42414	0.981802	260	2	-0.64141	0.97733	0.97805	0.994739	640	0	-0.64141
FBgn0028476	10	0.24514	0.43732	0.981802	271	3	-1.0635	0.97777	0.97842	0.994739	641	0	-1.0635
FBgn0039241	10	0.20123	0.38698	0.981802	233	3	-0.80573	0.97873	0.97948	0.994739	642	0	-0.80573
FBgn0037579	10	0.71047	0.79718	0.981802	486	1	-0.57339	0.98247	0.98299	0.995898	643	0	-0.57339
FBgn0036156	10	0.052933	0.15237	0.981802	77	4	-0.82563	0.98306	0.98368	0.995898	644	0	-0.82563
FBgn0015570	8	0.77887	0.79011	0.981802	513	1	-1.0635	0.9873	0.98723	0.997944	645	0	-1.0635
FBgn0039710	10	0.086983	0.21795	0.981802	124	4	-0.77173	0.98882	0.98939	0.998577	646	0	-0.77173
FBgn0031194	10	0.32759	0.53066	0.981802	316	1	-0.72	0.99477	0.99506	0.999708	647	0	-0.72
FBgn0029117	10	0.073181	0.19175	0.981802	104	3	-1.0635	0.99735	0.99745	0.999708	648	0	-1.0635
FBgn0003134	10	0.056158	0.15935	0.981802	81	3	-1.0635	0.99876	0.99889	0.999708	649	0	-1.0635
FBgn0029648	10	0.077611	0.20032	0.981802	110	4	-0.97008	0.99953	0.99957	0.999708	650	0	-0.97008
FBgn0030087	10	0.017878	0.063858	0.981802	35	5	-1.05	0.99966	0.99968	0.999708	651	0	-1.05
FBgn0266667	10	0.019557	0.068568	0.981802	36	3	-1.0635	0.99969	0.99971	0.999708	652	0	-1.0635

## Sheet: S1F-CG8468-15d
sgrna	Gene	DMSO LFC	rapa LFC
Doe2_3036	FBgn0033913	1.3126	2.3516
Doe2_3032	FBgn0033913	-1.1651	2.5735
Doe2_3034	FBgn0033913	-0.79784	-0.8189
Doe2_3033	FBgn0033913	-0.79784	-0.8189
Doe2_3029	FBgn0033913	-0.79784	-0.8189
Doe2_3028	FBgn0033913	-0.79784	-0.8189
Doe2_3031	FBgn0033913	0.278	1.1596
Doe2_3030	FBgn0033913	-0.42257	1.0978
Doe2_3035	FBgn0033913	-0.68591	2.7754
Doe2_3027	FBgn0033913	0.0068746	1.8392

[truncated: 1 more sheets: S1F-CG8468-30d]
