# Supplementary material for: Pooled genome-wide CRISPR activation screening for rapamycin resistance genes in Drosophila cells
Source: eLife journal article supplement (doi:10.7554/elife.85542), 2023-04-10
Supplement: fig2-figsupp2-data1 [file Figure 2-figure supplement2 Source Data.xlsx]

## Sheet: S2C reads
sgRNA	Gene	NGS reads
Doe7325	FBgn0004598	0
Doe48549	FBgn0020312	0
Doe82345	FBgn0033063	0
Doe59194	FBgn0031114	0
Doe39499	FBgn0039679	0
Doe38020	FBgn0029866	0
Doe3349	FBgn0038461	0
Doe77424	FBgn0031947	0
Doe68959	FBgn0051773	0
Doe33724	FBgn0016983	0
Doe27986	FBgn0052529	0
Doe21435	FBgn0034931	0
Doe34556	FBgn0027280	0
Doe7104	FBgn0267789	0
Doe69859	FBgn0052371	0
Doe16811	FBgn0036259	0
Doe29632	FBgn0262739	0
Doe41113	FBgn0040514	0
Doe25866	FBgn0035777	0
Doe903	FBgn0266836	0
Doe19319	FBgn0034152	0
Doe9497	FBgn0037241	0
Doe26396	FBgn0033616	0
Doe68801	FBgn0051201	0
Doe10372	FBgn0037498	0
Doe58283	FBgn0004179	0
Doe67725	FBgn0050288	0
Doe66774	FBgn0000412	0
Doe2992	FBgn0267659	0
Doe48119	FBgn0022768	0
Doe20407	FBgn0034748	0
Doe49965	FBgn0026760	0
Doe166	intergenic	0
Doe58123	FBgn0010452	0
Doe7293	FBgn0004368	0
Doe13318	FBgn0265271	0
Doe23263	FBgn0038006	0
Doe13965	FBgn0263866	0
Doe34668	FBgn0021895	0
Doe63372	FBgn0051122	0
Doe26347	FBgn0033599	0
Doe68809	FBgn0051202	0
Doe34897	FBgn0024273	0
Doe15637	FBgn0036083	0
Doe69537	FBgn0051679	0
Doe54444	FBgn0004839	0
Doe52881	FBgn0030170	0
Doe33543	FBgn0015521	0
Doe4529	FBgn0039341	0
Doe82747	FBgn0030443	0
Doe29153	FBgn0259099	0
Doe83801	FBgn0030624	0
Doe42631	FBgn0053202	0
Doe70351	FBgn0263451	0
Doe44403	FBgn0042119	0
Doe28511	FBgn0261278	0
Doe2808	FBgn0267916	0
Doe23027	FBgn0037918	0
Doe10492	FBgn0037619	0
Doe44043	FBgn0265051	0
Doe80480	FBgn0038598	0
Doe30820	FBgn0264894	0
Doe82681	FBgn0030484	0
Doe52965	FBgn0030280	0
Doe897	FBgn0266818	0
Doe43604	FBgn0265080	0
Doe32573	FBgn0028886	0
Doe8055	FBgn0036612	0
Doe1860	FBgn0267539	0
Doe31799	FBgn0260748	0
Doe35673	FBgn0035254	0
Doe78033	FBgn0032260	0
Doe77309	FBgn0031987	0
Doe28927	FBgn0004198	0
Doe277	intergenic	0
Doe69512	FBgn0051665	0
Doe58550	FBgn0267972	0
Doe63523	FBgn0086913	0
Doe48475	FBgn0023169	0
Doe42142	FBgn0053531	0
Doe68705	FBgn0051235	0
Doe29893	FBgn0260933	0
Doe25634	FBgn0035755	0
Doe24956	FBgn0035401	0
Doe73283	FBgn0037031	0
Doe4844	FBgn0000500	0
Doe33062	FBgn0031420	0
Doe32058	FBgn0029915	0
Doe23705	FBgn0265368	0
Doe77676	FBgn0031831	0
Doe59496	FBgn0029696	0
Doe33634	FBgn0014857	0
Doe27584	FBgn0033723	0
Doe2997	FBgn0267661	0
Doe22545	FBgn0038100	0
Doe26794	FBgn0033440	0
Doe55957	FBgn0261531	0
Doe33527	FBgn0015586	0
Doe4256	FBgn0039897	0
Doe13448	FBgn0265137	0
Doe80685	FBgn0038676	0
Doe62222	FBgn0266683	0
Doe34558	FBgn0027280	0
Doe21184	FBgn0035145	0
Doe38162	FBgn0039478	0
Doe36206	FBgn0036131	0
Doe23585	FBgn0265653	0
Doe10491	FBgn0037619	0
Doe44013	FBgn0264902	0
Doe27691	FBgn0033819	0
Doe10468	FBgn0037601	0
Doe72717	FBgn0038163	0
Doe4527	FBgn0039407	0
Doe39660	FBgn0040153	0
Doe82748	FBgn0030443	0
Doe18197	FBgn0266045	0
Doe44200	FBgn0265041	0
Doe13804	FBgn0260945	0
Doe81109	FBgn0032907	0
Doe23703	FBgn0265366	0
Doe30627	FBgn0263971	0
Doe59386	FBgn0023495	0
Doe71011	FBgn0263383	0
Doe31623	FBgn0266418	0
Doe32478	FBgn0027504	0
Doe10553	FBgn0037573	0
Doe55484	FBgn0259965	0
Doe17225	FBgn0264272	0
Doe14499	FBgn0038752	0
Doe71936	FBgn0034674	0
Doe21198	FBgn0035150	0
Doe12796	FBgn0086768	0
Doe57993	FBgn0262867	0
Doe69419	FBgn0051706	0
Doe68815	FBgn0051205	0
Doe59046	FBgn0030272	0
Doe81405	FBgn0032965	0
Doe13331	FBgn0265252	0
Doe56732	FBgn0262357	0
Doe44496	FBgn0044011	0
Doe22838	FBgn0038126	0
Doe17799	FBgn0002023	0
Doe35173	FBgn0035287	0
Doe35914	FBgn0036759	0
Doe53004	FBgn0030215	0
Doe43779	FBgn0265164	0
Doe40822	FBgn0040389	0
Doe78732	FBgn0032167	0
Doe54390	FBgn0004650	0
Doe77253	FBgn0031979	0
Doe81609	FBgn0032709	0
Doe31883	FBgn0031220	0
Doe47685	FBgn0017558	0
Doe83248	FBgn0030437	0
Doe77011	FBgn0031522	0
Doe71707	FBgn0263976	0
Doe30758	FBgn0264711	0
Doe42980	FBgn0264870	0
Doe16495	FBgn0036341	0
Doe69235	FBgn0051627	0
Doe27538	FBgn0033762	0
Doe26643	FBgn0033648	0
Doe18827	FBgn0034165	0
Doe22687	FBgn0038082	0
Doe64370	FBgn0032456	0
Doe65425	FBgn0033473	0
Doe11929	FBgn0085213	0
Doe28507	FBgn0037913	0
Doe54272	FBgn0004878	0
Doe36618	FBgn0030572	0
Doe43370	FBgn0264573	0
Doe32405	FBgn0028421	0
Doe35652	FBgn0035142	0
Doe59261	FBgn0027081	0
Doe30673	FBgn0263256	0
Doe17646	FBgn0034479	0
Doe64859	FBgn0032294	0
Doe2417	FBgn0267440	0
Doe82144	FBgn0033286	0
Doe39249	FBgn0039779	0
Doe13720	FBgn0261086	0
Doe73050	FBgn0036090	0
Doe48842	FBgn0020639	0
Doe67143	FBgn0038470	0
Doe41561	FBgn0052459	0
Doe9750	FBgn0037325	0
Doe69726	FBgn0052185	0
Doe68081	FBgn0051342	0
Doe43846	FBgn0265188	0
Doe2964	FBgn0267632	0
Doe73229	FBgn0037016	0
Doe408	FBgn0266978	0
Doe40077	FBgn0039862	0
Doe33733	FBgn0019890	0
Doe72556	FBgn0033457	0
Doe21487	FBgn0034884	0
Doe82513	FBgn0033140	0
Doe41114	FBgn0040514	0
Doe76315	FBgn0031317	0
Doe53341	FBgn0030050	0
Doe37880	FBgn0283469	0
Doe69499	FBgn0051676	0
Doe30592	FBgn0263582	0
Doe7776	FBgn0004087	0
Doe80753	FBgn0038505	0
Doe43949	FBgn0264896	0
Doe14357	FBgn0038942	0
Doe83037	FBgn0030330	0
Doe3635	FBgn0038603	0
Doe14042	FBgn0263249	0
Doe34785	FBgn0020307	0
Doe53818	FBgn0003896	0
Doe58490	FBgn0267959	0
Doe56837	FBgn0262583	0
Doe39471	FBgn0039685	0
Doe79025	FBgn0032682	0
Doe78376	FBgn0032304	0
Doe33468	FBgn0030776	0
Doe18588	FBgn0053987	0
Doe62265	FBgn0266639	0
Doe78684	FBgn0032153	0
Doe60147	FBgn0036731	0
Doe22297	FBgn0037653	0
Doe77027	FBgn0031515	0
Doe65485	FBgn0033313	0
Doe25711	FBgn0035675	0
Doe67883	FBgn0050383	0
Doe38630	FBgn0039288	0
Doe18344	FBgn0000479	0
Doe32850	FBgn0031081	0
Doe54719	FBgn0004436	0
Doe12667	FBgn0051690	0
Doe11475	FBgn0053703	0
Doe22738	FBgn0038149	0
Doe30701	FBgn0263220	0
Doe83750	FBgn0030854	0
Doe51301	FBgn0028894	0
Doe45167	FBgn0050008	0
Doe34444	FBgn0025571	0
Doe58816	FBgn0267990	0
Doe77015	FBgn0031523	0
Doe6003	FBgn0002863	0
Doe75310	FBgn0031129	0
Doe22456	FBgn0037712	0
Doe54995	FBgn0004580	0
Doe8692	FBgn0036569	0
Doe35427	FBgn0035754	0
Doe7481	FBgn0005558	0
Doe62282	FBgn0266654	0
Doe34257	FBgn0012034	0
Doe42072	FBgn0053289	0
Doe38072	FBgn0262976	0
Doe73408	FBgn0085486	0
Doe2385	FBgn0267428	0
Doe26600	FBgn0033686	0
Doe20846	FBgn0034726	0
Doe17160	FBgn0020622	0
Doe57888	FBgn0262647	0
Doe79395	FBgn0032490	0
Doe76568	FBgn0031651	0
Doe31747	FBgn0050058	0
Doe31166	FBgn0037669	0
Doe74428	FBgn0259794	0
Doe41606	FBgn0052462	0
Doe67591	FBgn0051008	0
Doe28978	FBgn0261836	0
Doe51956	FBgn0029809	0
Doe44782	FBgn0041087	0
Doe65607	FBgn0033761	0
Doe42697	FBgn0053180	0
Doe81148	FBgn0032916	0
Doe78239	FBgn0032339	0
Doe71336	FBgn0264373	0
Doe19269	FBgn0034137	0
Doe3571	FBgn0037339	0
Doe60131	FBgn0000568	0
Doe8589	FBgn0036603	0
Doe68098	FBgn0051344	0
Doe42826	FBgn0264606	0
Doe5934	FBgn0002773	0
Doe74710	FBgn0087040	0
Doe71524	FBgn0263778	0
Doe5982	FBgn0002732	0
Doe13271	FBgn0050424	0
Doe81114	FBgn0032906	0
Doe31179	FBgn0035266	0
Doe45765	FBgn0046685	0
Doe12125	FBgn0085261	0
Doe34032	FBgn0010412	0
Doe23995	FBgn0265423	0
Doe7926	FBgn0003525	0
Doe82793	FBgn0030477	0
Doe6244	FBgn0001978	0
Doe62029	FBgn0266625	0
Doe65663	FBgn0033885	0
Doe34374	FBgn0025360	0
Doe30905	FBgn0264493	0
Doe48573	FBgn0019985	0
Doe21256	FBgn0035152	0
Doe43449	FBgn0264513	0
Doe60831	FBgn0051407	0
Doe70174	FBgn0052121	0
Doe69703	FBgn0052185	0
Doe55732	FBgn0259982	0
Doe61562	FBgn0266225	0
Doe27679	FBgn0033828	0
Doe75125	FBgn0031155	0
Doe77533	FBgn0032021	0
Doe44854	FBgn0041775	0
Doe63088	FBgn0044051	0
Doe60048	FBgn0036116	0
Doe61350	FBgn0266157	0
Doe80872	FBgn0038447	0
Doe70893	FBgn0263114	0
Doe20496	FBgn0034860	0
Doe50331	FBgn0026252	0
Doe50120	FBgn0025820	0
Doe37730	FBgn0025628	0
Doe84125	FBgn0030679	0
Doe70661	FBgn0263507	0
Doe39847	FBgn0040337	0
Doe25031	FBgn0035501	0
Doe13786	FBgn0250862	0
Doe66887	FBgn0267028	0
Doe45320	FBgn0050065	0
Doe26781	FBgn0033454	0
Doe56483	FBgn0261445	0
Doe39168	FBgn0039770	0
Doe38019	FBgn0029864	0
Doe58436	FBgn0014028	0
Doe53214	FBgn0029924	0
Doe13594	FBgn0265864	0
Doe46477	FBgn0010313	0
Doe42897	FBgn0264696	0
Doe1537	FBgn0266988	0
Doe34923	FBgn0024947	0
Doe1265	FBgn0267213	0
Doe15183	FBgn0039228	0
Doe31185	FBgn0034728	0
Doe31787	FBgn0036967	0
Doe17253	FBgn0022361	0
Doe55506	FBgn0259961	0
Doe23143	FBgn0038012	0
Doe25196	FBgn0035359	0
Doe53950	FBgn0003132	0
Doe9591	FBgn0037195	0
Doe54986	FBgn0004510	0
Doe35343	FBgn0035708	0
Doe5304	FBgn0000084	0
Doe112	scrambled	0
Doe66917	FBgn0032420	0
Doe43021	FBgn0264776	0
Doe45900	FBgn0010441	0
Doe51362	FBgn0028935	0
Doe4425	FBgn0040554	0
Doe23012	FBgn0037918	0
Doe66500	FBgn0278608	0
Doe69489	FBgn0051679	0
Doe24742	FBgn0265754	0
Doe43622	FBgn0265104	0
Doe1417	FBgn0267200	0
Doe13768	FBgn0262007	0
Doe34239	FBgn0013305	0
Doe60956	FBgn0000723	0
Doe79912	FBgn0038385	0
Doe13047	FBgn0039404	0
Doe69478	FBgn0051735	0
Doe71575	FBgn0263838	0
Doe29748	FBgn0262519	0
Doe76851	FBgn0031538	0
Doe55488	FBgn0259966	0
Doe79575	FBgn0038339	0
Doe71123	FBgn0264325	0
Doe1599	FBgn0267004	0
Doe66741	FBgn0030734	0
Doe32366	FBgn0029662	0
Doe17212	FBgn0015872	0
Doe78635	FBgn0032200	0
Doe47127	FBgn0013334	0
Doe8006	FBgn0036686	0
Doe62746	FBgn0051935	0
Doe72790	FBgn0037574	0
Doe242	scrambled	0
Doe56679	FBgn0262150	0
Doe35100	FBgn0035620	0
Doe76019	FBgn0031426	0
Doe11566	FBgn0053644	0
Doe47209	FBgn0013432	0
Doe3056	FBgn0267604	0
Doe77813	FBgn0031888	0
Doe56664	FBgn0262476	0
Doe17046	FBgn0036277	0
Doe49901	FBgn0027330	0
Doe23864	FBgn0265496	0
Doe287	intergenic	0
Doe72906	FBgn0039233	0
Doe35338	FBgn0035704	0
Doe930	FBgn0266829	0
Doe24559	FBgn0265701	0
Doe72406	FBgn0032373	0
Doe29438	FBgn0261954	0
Doe58561	FBgn0267982	0
Doe14656	FBgn0038845	0
Doe68855	FBgn0051803	0
Doe21715	FBgn0034964	0
Doe66570	FBgn0250788	0
Doe67667	FBgn0051017	0
Doe48060	FBgn0015591	0
Doe18251	FBgn0032399	0
Doe77030	FBgn0031515	0
Doe72055	FBgn0034061	0
Doe45003	FBgn0050044	0
Doe76903	FBgn0031554	0
Doe24089	FBgn0265851	0
Doe76118	FBgn0031239	0
Doe39149	FBgn0039804	0
Doe35740	FBgn0035049	0
Doe35544	FBgn0034691	0
Doe47890	FBgn0015295	0
Doe54536	FBgn0005771	0
Doe8547	FBgn0036587	0
Doe9	intergenic	0
Doe64678	FBgn0032010	0
Doe74033	FBgn0085430	0
Doe50738	FBgn0028474	0
Doe6574	FBgn0000479	0
Doe11500	FBgn0053641	0
Doe58398	FBgn0014455	0
Doe3013	FBgn0267645	0
Doe23153	FBgn0038042	0
Doe65337	FBgn0034408	0
Doe39841	FBgn0040337	0
Doe25795	FBgn0035800	0
Doe11516	FBgn0053641	0
Doe41626	FBgn0052499	0
Doe53692	FBgn0004055	0
Doe63198	FBgn0041789	0
Doe54956	FBgn0004514	0
Doe62597	FBgn0266431	0
Doe23120	FBgn0038017	0
Doe44149	FBgn0264995	0
Doe79800	FBgn0038422	0
Doe37173	FBgn0025637	0
Doe57682	FBgn0263020	0
Doe57876	FBgn0262621	0
Doe55918	FBgn0261523	0
Doe62370	FBgn0266328	0
Doe15977	FBgn0036145	0
Doe39252	FBgn0039779	0
Doe19378	FBgn0034099	0
Doe7995	FBgn0036686	0
Doe31682	FBgn0052529	0
Doe68918	FBgn0051774	0
Doe57380	FBgn0262951	0
Doe32409	FBgn0028473	0
Doe66635	FBgn0039784	0
Doe31789	FBgn0266195	0
Doe84	scrambled	0
Doe38904	FBgn0039736	0
Doe48616	FBgn0019968	0
Doe54975	FBgn0004463	0
Doe62916	FBgn0052681	0
Doe35639	FBgn0035211	0
Doe8467	FBgn0036490	0
Doe26243	FBgn0035598	0
Doe55771	FBgn0260007	0
Doe50039	FBgn0026079	0
Doe46962	FBgn0011737	0
Doe78666	FBgn0032198	0
Doe53932	FBgn0003169	0
Doe53087	FBgn0030170	0
Doe58236	FBgn0003396	0
Doe22235	FBgn0037696	0
Doe6071	FBgn0001254	0
Doe54764	FBgn0004360	0
Doe19845	FBgn0034346	0
Doe2092	FBgn0267551	0
Doe16038	FBgn0035931	0
Doe65976	FBgn0001404	0
Doe71267	FBgn0264271	0
Doe37274	FBgn0086913	0
Doe53063	FBgn0030230	0
Doe40454	FBgn0040747	0
Doe33459	FBgn0030788	0
Doe59742	FBgn0037093	0
Doe14177	FBgn0038878	0
Doe54113	FBgn0003330	0
Doe72856	FBgn0038827	0
Doe51158	FBgn0027602	0
Doe27031	FBgn0033465	0
Doe36729	FBgn0027873	0
Doe26247	FBgn0035598	0
Doe18034	FBgn0265045	0
Doe25428	FBgn0035343	0
Doe51077	FBgn0027841	0
Doe8519	FBgn0036499	0
Doe44698	FBgn0041225	0
Doe48485	FBgn0020391	0
Doe56595	FBgn0262467	0
Doe55205	FBgn0260645	0
Doe63097	FBgn0044047	0
Doe25258	FBgn0035204	0
Doe66641	FBgn0045035	0
Doe37908	FBgn0267152	0
Doe3849	FBgn0037517	0
Doe42205	FBgn0053557	0
Doe13742	FBgn0262020	0
Doe79403	FBgn0032490	0
Doe63155	FBgn0046222	0
Doe65081	FBgn0034121	0
Doe80401	FBgn0038590	0
Doe9627	FBgn0037199	0
Doe15477	FBgn0039125	0
Doe29975	FBgn0260026	0
Doe55336	FBgn0260798	0
Doe21247	FBgn0035159	0
Doe74897	FBgn0250845	0
Doe5669	FBgn0002638	0
Doe68748	FBgn0051265	0
Doe53082	FBgn0030224	0
Doe69613	FBgn0052221	0
Doe50768	FBgn0028504	0
Doe56261	FBgn0261279	0
Doe51835	FBgn0028879	0
Doe54479	FBgn0005696	0
Doe66449	FBgn0267828	0
Doe76985	FBgn0031496	0
Doe30039	FBgn0261573	0
Doe57648	FBgn0262998	0
Doe82715	FBgn0030449	0
Doe75143	FBgn0031157	0
Doe5042	FBgn0000826	0
Doe40457	FBgn0040763	0
Doe36696	FBgn0015756	0
Doe33382	FBgn0031708	0
Doe36890	FBgn0003885	0
Doe50887	FBgn0027572	0
Doe70997	FBgn0263380	0
Doe6661	FBgn0266737	0
Doe56622	FBgn0262364	0
Doe54372	FBgn0004777	0
Doe28050	FBgn0083956	0
Doe78146	FBgn0032235	0
Doe21296	FBgn0035107	0
Doe11918	FBgn0085198	0
Doe64377	FBgn0032481	0
Doe62479	FBgn0266318	0
Doe24339	FBgn0265884	0
Doe77104	FBgn0031640	0
Doe66354	FBgn0283521	0
Doe37578	FBgn0030744	0
Doe4627	FBgn0039137	0
Doe34661	FBgn0026418	0
Doe46337	FBgn0010052	0
Doe81313	FBgn0033055	0
Doe13903	FBgn0263290	0
Doe30575	FBgn0263663	0
Doe14700	FBgn0038866	0
Doe29364	FBgn0034031	0
Doe33434	FBgn0030674	0
Doe18487	FBgn0053181	0
Doe73355	FBgn0036655	0
Doe58574	FBgn0267946	0
Doe2593	FBgn0267753	0
Doe64428	FBgn0033113	0
Doe34197	FBgn0011785	0
Doe61017	FBgn0001234	0
Doe83152	FBgn0030316	0
Doe29222	FBgn0032707	0
Doe33859	FBgn0016926	0
Doe40543	FBgn0040725	0
Doe33224	FBgn0030344	0
Doe39735	FBgn0040234	0
Doe81668	FBgn0032827	0
Doe66397	FBgn0003028	0
Doe14876	FBgn0039163	0
Doe25185	FBgn0035480	0
Doe36282	FBgn0036173	0
Doe31640	FBgn0264299	0
Doe14230	FBgn0038890	0
Doe50223	FBgn0026373	0
Doe10954	FBgn0037421	0
Doe69807	FBgn0052319	0
Doe5178	FBgn0000591	0
Doe81526	FBgn0032763	0
Doe29303	FBgn0029761	0
Doe69563	FBgn0051680	0
Doe74881	FBgn0250831	0
Doe17790	FBgn0263663	0
Doe71948	FBgn0034493	0
Doe65027	FBgn0034068	0
Doe68634	FBgn0051229	0
Doe72949	FBgn0038304	0
Doe48448	FBgn0023212	0
Doe9919	FBgn0037110	0
Doe33234	FBgn0030357	0
Doe20567	FBgn0034833	0
Doe52381	FBgn0029643	0
Doe9948	FBgn0037109	0
Doe45702	FBgn0046258	0
Doe14223	FBgn0038889	0
Doe20988	FBgn0034681	0
Doe56063	FBgn0261830	0
Doe38239	FBgn0039429	0
Doe62427	FBgn0266303	0
Doe27585	FBgn0033715	0
Doe75532	FBgn0031008	0
Doe5949	FBgn0002735	0
Doe34206	FBgn0011661	0
Doe75566	FBgn0031033	0
Doe28515	FBgn0037912	0
Doe35404	FBgn0035770	0
Doe3172	FBgn0267717	0
Doe10455	FBgn0037612	0
Doe30439	FBgn0266757	0
Doe9849	FBgn0037292	0
Doe75010	FBgn0031092	0
Doe9895	FBgn0037082	0
Doe68447	FBgn0051145	0
Doe49397	FBgn0023550	0
Doe60357	FBgn0001248	0
Doe12027	FBgn0085293	0
Doe25976	FBgn0035563	0
Doe46140	FBgn0011294	0
Doe78815	FBgn0032551	0
Doe40379	FBgn0039924	0
Doe31	intergenic	0
Doe2855	FBgn0267790	0
Doe20680	FBgn0034639	0
Doe6115	FBgn0001138	0
Doe59751	FBgn0052451	0
Doe56226	FBgn0261061	0
Doe66480	FBgn0278598	0
Doe36314	FBgn0035959	0
Doe68618	FBgn0051106	0
Doe10382	FBgn0037501	0
Doe20038	FBgn0034426	0
Doe54977	FBgn0004507	0
Doe10604	FBgn0037594	0
Doe74646	FBgn0086907	0
Doe44458	FBgn0043783	0
Doe82950	FBgn0030543	0
Doe65491	FBgn0033320	0
Doe53059	FBgn0030237	0
Doe30572	FBgn0263659	0
Doe19102	FBgn0034045	0
Doe80992	FBgn0038523	0
Doe66944	FBgn0031257	0
Doe60879	FBgn0086687	0
Doe11399	FBgn0053690	0
Doe30667	FBgn0263237	0
Doe76736	FBgn0031752	0
Doe26971	FBgn0033541	0
Doe79337	FBgn0032391	0
Doe42229	FBgn0053544	0
Doe61703	FBgn0265942	0
Doe76380	FBgn0031288	0
Doe73303	FBgn0037163	0
Doe63489	FBgn0086708	0
Doe50387	FBgn0026255	0
Doe5729	FBgn0002431	0
Doe41933	FBgn0052557	0
Doe35221	FBgn0035397	0
Doe22256	FBgn0037645	0
Doe22832	FBgn0038136	0
Doe76634	FBgn0031675	0
Doe80598	FBgn0038658	0
Doe63663	FBgn0259241	0
Doe10020	FBgn0037064	0
Doe63233	FBgn0042693	0
Doe7857	FBgn0003475	0
Doe82275	FBgn0033129	0
Doe17808	FBgn0026086	0
Doe41153	FBgn0040629	0
Doe65927	FBgn0003870	0
Doe64968	FBgn0032202	0
Doe2149	FBgn0267567	0
Doe12603	FBgn0053494	0
Doe74234	FBgn0259244	0
Doe52724	FBgn0030120	0
Doe49407	FBgn0024184	0
Doe33356	FBgn0030839	0
Doe46042	FBgn0011566	0
Doe1646	FBgn0267097	0
Doe55138	FBgn0260750	0
Doe50494	FBgn0028424	0
Doe59161	FBgn0031251	0
Doe66185	FBgn0267246	0
Doe4800	FBgn0039594	0
Doe79964	FBgn0038207	0
Doe27904	FBgn0085207	0
Doe58665	FBgn0267934	0
Doe76199	FBgn0031208	0
Doe53302	FBgn0030029	0
Doe6809	FBgn0267249	0
Doe15271	FBgn0039059	0
Doe49574	FBgn0024364	0
Doe60411	FBgn0052423	0
Doe6117	FBgn0001138	0
Doe72013	FBgn0034159	0
Doe56433	FBgn0261399	0
Doe55000	FBgn0004581	0
Doe44785	FBgn0041087	0
Doe16863	FBgn0036207	0
Doe32190	FBgn0030121	0
Doe59907	FBgn0010300	0
Doe18509	FBgn0259228	0
Doe67811	FBgn0050169	0
Doe37868	FBgn0263490	0
Doe29242	FBgn0086655	0
Doe28647	FBgn0261570	0
Doe16222	FBgn0035987	0
Doe53774	FBgn0004118	0
Doe44098	FBgn0265073	0
Doe40504	FBgn0040778	0
Doe50002	FBgn0027052	0
Doe31487	FBgn0266377	0
Doe30897	FBgn0264255	0
Doe36044	FBgn0037182	0
Doe24960	FBgn0035413	0
Doe18820	FBgn0034162	0
Doe10059	FBgn0037156	0
Doe15227	FBgn0039041	0
Doe22290	FBgn0037654	0
Doe77050	FBgn0031623	0
Doe20572	FBgn0034834	0
Doe52036	FBgn0029816	0
Doe56723	FBgn0262358	0
Doe42448	FBgn0053082	0
Doe65444	FBgn0033526	0
Doe39676	FBgn0040099	0
Doe3107	FBgn0267624	0
Doe36397	FBgn0036570	0
Doe70121	FBgn0052006	0
Doe11514	FBgn0053643	0
Doe10517	FBgn0037615	0
Doe41631	FBgn0052488	0
Doe44368	FBgn0042102	0
Doe38039	FBgn0025613	0
Doe71274	FBgn0264269	0
Doe812	FBgn0266729	0
Doe47508	FBgn0019809	0
Doe23715	FBgn0265366	0
Doe72522	FBgn0002872	0
Doe48619	FBgn0019972	0
Doe75061	FBgn0031042	0
Doe41955	FBgn0053349	0
Doe82734	FBgn0030440	0
Doe54096	FBgn0003310	0
Doe51852	FBgn0028836	0
Doe34387	FBgn0025390	0
Doe32638	FBgn0029525	0
Doe71445	FBgn0264363	0
Doe18930	FBgn0034290	0
Doe77816	FBgn0031888	0
Doe18712	FBgn0034187	0
Doe26968	FBgn0033542	0
Doe81856	FBgn0033259	0
Doe46540	FBgn0010341	0
Doe56882	FBgn0262530	0
Doe33895	FBgn0011241	0
Doe58723	FBgn0283467	0
Doe61314	FBgn0266124	0
Doe34022	FBgn0010473	0
Doe20628	FBgn0034612	0
Doe67413	FBgn0050401	0
Doe17951	FBgn0033584	0
Doe55357	FBgn0260771	0
Doe10989	FBgn0037454	0
Doe34861	FBgn0024315	0
Doe80451	FBgn0038606	0
Doe21485	FBgn0034884	0
Doe68327	FBgn0051495	0
Doe19150	FBgn0034058	0
Doe15581	FBgn0039085	0
Doe10872	FBgn0037460	0
Doe53621	FBgn0003460	0
Doe58705	FBgn0283476	0
Doe27130	FBgn0033880	0
Doe43878	FBgn0264941	0
Doe67043	FBgn0011277	0
Doe53592	FBgn0003462	0
Doe1735	FBgn0267067	0
Doe51214	FBgn0028965	0
Doe2847	FBgn0267811	0
Doe76671	FBgn0031745	0
Doe36126	FBgn0037023	0
Doe24010	FBgn0265451	0
Doe28582	FBgn0264855	0
Doe2107	FBgn0267542	0
Doe59782	FBgn0004865	0
Doe72349	FBgn0032305	0
Doe53143	FBgn0029951	0
Doe61204	FBgn0266179	0
Doe59473	FBgn0029705	0
Doe84131	FBgn0030684	0
Doe41731	FBgn0052418	0
Doe22200	FBgn0037700	0
Doe53688	FBgn0004053	0
Doe5764	FBgn0002306	0
Doe27174	FBgn0033912	0
Doe12716	FBgn0052086	0
Doe41655	FBgn0052463	0
Doe77578	FBgn0032032	0
Doe34806	FBgn0020622	0
Doe67242	FBgn0036250	0
Doe5450	FBgn0000276	0
Doe27434	FBgn0033925	0
Doe5399	FBgn0000061	0
Doe39296	FBgn0039620	0
Doe65490	FBgn0033309	0
Doe63244	FBgn0043455	0
Doe16062	FBgn0035921	0
Doe23363	FBgn0265614	0
Doe11934	FBgn0085210	0
Doe24107	FBgn0265870	0
Doe38518	FBgn0039315	0
Doe16987	FBgn0036318	0
Doe31739	FBgn0032721	0
Doe73494	FBgn0085638	0
Doe52162	FBgn0029858	0
Doe77241	FBgn0031974	0
Doe33185	FBgn0030670	0
Doe57268	FBgn0262017	0
Doe67756	FBgn0050284	0
Doe25862	FBgn0035779	0
Doe196	intergenic	0
Doe53843	FBgn0004034	0
Doe51792	FBgn0028878	0
Doe43088	FBgn0264477	0
Doe75050	FBgn0031055	0
Doe10724	FBgn0037415	0
Doe39688	FBgn0040104	0
Doe24100	FBgn0265869	0
Doe6212	FBgn0001983	0
Doe35997	FBgn0036821	0
Doe66436	FBgn0267792	0
Doe26958	FBgn0033507	0
Doe49799	FBgn0026533	0
Doe5234	FBgn0000119	0
Doe9285	FBgn0036768	0
Doe66438	FBgn0267793	0
Doe57194	FBgn0262101	0
Doe48276	FBgn0022359	0
Doe19203	FBgn0033995	0
Doe59913	FBgn0032666	0
Doe11027	FBgn0054030	0
Doe68151	FBgn0051278	0
Doe8597	FBgn0036594	0
Doe27867	FBgn0033806	0
Doe31901	FBgn0043536	0
Doe34291	FBgn0025809	0
Doe64194	FBgn0085309	0
Doe56965	FBgn0261976	0
Doe44393	FBgn0042137	0
Doe4088	FBgn0040009	0
Doe7066	FBgn0000256	0
Doe13169	FBgn0051548	0
Doe77947	FBgn0031849	0
Doe15778	FBgn0036044	0
Doe13585	FBgn0266582	0
Doe39341	FBgn0039629	0
Doe8942	FBgn0036990	0
Doe57481	FBgn0262889	0
Doe51600	FBgn0028675	0
Doe855	FBgn0266823	0
Doe24542	FBgn0265700	0
Doe56935	FBgn0262541	0
Doe56740	FBgn0262360	0
Doe64730	FBgn0031799	0
Doe83174	FBgn0030310	0
Doe3649	FBgn0038738	0
Doe29028	FBgn0039908	0
Doe12013	FBgn0085282	0
Doe57766	FBgn0262683	0
Doe6824	FBgn0267249	0
Doe44594	FBgn0043470	0
Doe63687	FBgn0087039	0
Doe79904	FBgn0038377	0
Doe54563	FBgn0005322	0
Doe40526	FBgn0040723	0
Doe57092	FBgn0261835	0
Doe61973	FBgn0266587	0
Doe39318	FBgn0039636	0
Doe79100	FBgn0032625	0
Doe80345	FBgn0038619	0
Doe35052	FBgn0035517	0
Doe59518	FBgn0030034	0
Doe21318	FBgn0035092	0
Doe16923	FBgn0036221	0
Doe26994	FBgn0033539	0
Doe17032	FBgn0036302	0
Doe41084	FBgn0040553	0
Doe83341	FBgn0030385	0
Doe49202	FBgn0025674	0
Doe31242	FBgn0264962	0
Doe71967	FBgn0033749	0
Doe71457	FBgn0264366	0
Doe45573	FBgn0045038	0
Doe44584	FBgn0043575	0
Doe30881	FBgn0263995	0
Doe20303	FBgn0034785	0
Doe81378	FBgn0032971	0
Doe17525	FBgn0031738	0
Doe59345	FBgn0027527	0
Doe20530	FBgn0034824	0
Doe82421	FBgn0033174	0
Doe61777	FBgn0266071	0
Doe73390	FBgn0036483	0
Doe27817	FBgn0033781	0
Doe83362	FBgn0030377	0
Doe33463	FBgn0030791	0
Doe26989	FBgn0033529	0
Doe70611	FBgn0263608	0
Doe43182	FBgn0264481	0
Doe56440	FBgn0261502	0
Doe31732	FBgn0266488	0
Doe50137	FBgn0025830	0
Doe6937	FBgn0267020	0
Doe57016	FBgn0261997	0
Doe80718	FBgn0038458	0
Doe12566	FBgn0052666	0
Doe10722	FBgn0037415	0
Doe51972	FBgn0029799	0
Doe82545	FBgn0033135	0
Doe40632	FBgn0040849	0
Doe19400	FBgn0034095	0
Doe42018	FBgn0053458	0
Doe6102	FBgn0001229	0
Doe27816	FBgn0033778	0
Doe80445	FBgn0038585	0
Doe16557	FBgn0036354	0
Doe21060	FBgn0035011	0
Doe17544	FBgn0262636	0
Doe19202	FBgn0034011	0
Doe45194	FBgn0050104	0
Doe44822	FBgn0041710	0
Doe80330	FBgn0038651	0
Doe69058	FBgn0051907	0
Doe43372	FBgn0264568	0
Doe18946	FBgn0034293	0
Doe65962	FBgn0029800	0
Doe78246	FBgn0032364	0
Doe81087	FBgn0032911	0
Doe31618	FBgn0266438	0
Doe59368	FBgn0024997	0
Doe9253	FBgn0036769	0
Doe5060	FBgn0000715	0
Doe10708	FBgn0037411	0
Doe17562	FBgn0031759	0
Doe37939	FBgn0050389	0
Doe69745	FBgn0052206	0
Doe72768	FBgn0037332	0
Doe79617	FBgn0038354	0
Doe15448	FBgn0039111	0
Doe60564	FBgn0263236	0
Doe70140	FBgn0051989	0
Doe1718	FBgn0267074	0
Doe62437	FBgn0266307	0
Doe15668	FBgn0036121	0
Doe1301	FBgn0267235	0
Doe75258	FBgn0031108	0
Doe43201	FBgn0264435	0
Doe72038	FBgn0033953	0
Doe28131	FBgn0030769	0
Doe39283	FBgn0039628	0
Doe9465	FBgn0036826	0
Doe16740	FBgn0036433	0
Doe27423	FBgn0033921	0
Doe31182	FBgn0035608	0
Doe15609	FBgn0036091	0
Doe34216	FBgn0011676	0
Doe73745	FBgn0086442	0
Doe1950	FBgn0267476	0
Doe82775	FBgn0030482	0
Doe64715	FBgn0031813	0
Doe57546	FBgn0263026	0
Doe40895	FBgn0040361	0
Doe11292	FBgn0063670	0
Doe51603	FBgn0028675	0
Doe2231	FBgn0267293	0
Doe38080	FBgn0011661	0
Doe72464	FBgn0002633	0
Doe23308	FBgn0265611	0
Doe475	FBgn0266863	0
Doe69039	FBgn0051872	0
Doe72580	FBgn0033226	0
Doe44115	FBgn0265063	0
Doe6603	FBgn0002566	0
Doe71831	FBgn0263968	0
Doe50522	FBgn0028331	0
Doe28570	FBgn0005427	0
Doe83628	FBgn0030897	0
Doe61423	FBgn0266242	0
Doe34238	FBgn0013576	0
Doe50980	FBgn0027512	0
Doe56093	FBgn0261813	0
Doe57343	FBgn0262024	0
Doe67265	FBgn0036368	0
Doe34685	FBgn0021979	0
Doe71627	FBgn0263662	0
Doe50808	FBgn0027560	0
Doe16911	FBgn0036221	0
Doe76605	FBgn0031646	0
Doe1415	FBgn0267198	0
Doe66839	FBgn0265003	0
Doe52527	FBgn0029710	0
Doe43609	FBgn0265103	0
Doe8072	FBgn0036606	0
Doe12953	FBgn0040279	0
Doe37632	FBgn0030418	0
Doe56923	FBgn0262539	0
Doe36057	FBgn0037305	0
Doe29652	FBgn0262871	0
Doe59547	FBgn0028426	0
Doe69386	FBgn0051561	0
Doe72590	FBgn0000147	0
Doe51622	FBgn0028704	0
Doe40485	FBgn0040763	0
Doe43172	FBgn0264482	0
Doe26819	FBgn0033375	0
Doe61455	FBgn0266252	0
Doe32541	FBgn0027598	0
Doe80761	FBgn0038486	0
Doe170	FBgn0264291	0
Doe46308	FBgn0010043	0
Doe42865	FBgn0264702	0
Doe59559	FBgn0028499	0
Doe78521	FBgn0032082	0
Doe40272	FBgn0039993	0
Doe57702	FBgn0262999	0
Doe62423	FBgn0266302	0
Doe43018	FBgn0264775	0
Doe22848	FBgn0038136	0
Doe25630	FBgn0035751	0
Doe4354	FBgn0041096	0
Doe64169	FBgn0067779	0
Doe1553	FBgn0266982	0
Doe3883	FBgn0037468	0
Doe70230	FBgn0052137	0
Doe34647	FBgn0026411	0
Doe5769	FBgn0002561	0
Doe41566	FBgn0052452	0
Doe46978	FBgn0011762	0
Doe42124	FBgn0053307	0
Doe63085	FBgn0052479	0
Doe17967	FBgn0029843	0
Doe7836	FBgn0004108	0
Doe66893	FBgn0267172	0
Doe34172	FBgn0014018	0
Doe24464	FBgn0265730	0
Doe28848	FBgn0262475	0
Doe34054	FBgn0010830	0
Doe70224	FBgn0052181	0
Doe83886	FBgn0030592	0
Doe6092	FBgn0001230	0
Doe42672	FBgn0053234	0
Doe28662	FBgn0261625	0
Doe31071	FBgn0267219	0
Doe78455	FBgn0032209	0
Doe83360	FBgn0030374	0
Doe58904	FBgn0030578	0
Doe2940	FBgn0267638	0
Doe14990	FBgn0039154	0
Doe7076	FBgn0283651	0
Doe19675	FBgn0034537	0
Doe5432	FBgn0000326	0
Doe33313	FBgn0030890	0
Doe37276	FBgn0261550	0
Doe11333	FBgn0058198	0
Doe13999	FBgn0262353	0
Doe2543	FBgn0267317	0
Doe31517	FBgn0267034	0
Doe3589	FBgn0038974	0
Doe46260	FBgn0010039	0
Doe51481	FBgn0028997	0
Doe9736	FBgn0037356	0
Doe22567	FBgn0038089	0
Doe9457	FBgn0036834	0
Doe31336	FBgn0010300	0
Doe34411	FBgn0024993	0
Doe28612	FBgn0053513	0
Doe49100	FBgn0025684	0
Doe2924	FBgn0267802	0
Doe84044	FBgn0030729	0
Doe50652	FBgn0028544	0
Doe13739	FBgn0262020	0
Doe30486	FBgn0266217	0
Doe70792	FBgn0263247	0
Doe72777	FBgn0037351	0
Doe37003	FBgn0265991	0
Doe19694	FBgn0034563	0
Doe45499	FBgn0044812	0
Doe28517	FBgn0034518	0
Doe70990	FBgn0263381	0
Doe76129	FBgn0031238	0
Doe79356	FBgn0032479	0
Doe29018	FBgn0261811	0
Doe73193	FBgn0035816	0
Doe57253	FBgn0262008	0
Doe12321	FBgn0067312	0
Doe43450	FBgn0264513	0
Doe16075	FBgn0035928	0
Doe52180	FBgn0029861	0
Doe17997	FBgn0033382	0
Doe2711	FBgn0267746	0
Doe54310	FBgn0004863	0
Doe68792	FBgn0051217	0
Doe45402	FBgn0045487	0
Doe69390	FBgn0051561	0
Doe10426	FBgn0037514	0
Doe45324	FBgn0050067	0
Doe74391	FBgn0259715	0
Doe12740	FBgn0085454	0
Doe35178	FBgn0035334	0
Doe68730	FBgn0051191	0
Doe38420	FBgn0039511	0
Doe14298	FBgn0038966	0
Doe16405	FBgn0036374	0
Doe41452	FBgn0053012	0
Doe16343	FBgn0035980	0
Doe54681	FBgn0004395	0
Doe55260	FBgn0260768	0
Doe36805	FBgn0051948	0
Doe81486	FBgn0032724	0
Doe46033	FBgn0011327	0
Doe28772	FBgn0034145	0
Doe30258	FBgn0265877	0
Doe38079	FBgn0011661	0
Doe64199	FBgn0085277	0
Doe30549	FBgn0266282	0
Doe6368	FBgn0001961	0
Doe81271	FBgn0033041	0
Doe61383	FBgn0266246	0
Doe26660	FBgn0033633	0
Doe79685	FBgn0038327	0
Doe27665	FBgn0033729	0
Doe5831	FBgn0002930	0
Doe68797	FBgn0051200	0
Doe40852	FBgn0040506	0
Doe4768	FBgn0039635	0
Doe72745	FBgn0037429	0
Doe80812	FBgn0038427	0
Doe21401	FBgn0034906	0
Doe32399	FBgn0027948	0
Doe74748	FBgn0250904	0
Doe79878	FBgn0038388	0
Doe17773	FBgn0259896	0
Doe66187	FBgn0267252	0
Doe81794	FBgn0032790	0
Doe66263	FBgn0266929	0
Doe59651	FBgn0031692	0
Doe82471	FBgn0033194	0
Doe14377	FBgn0038942	0
Doe62443	FBgn0266304	0
Doe46942	FBgn0011741	0
Doe33979	FBgn0011576	0
Doe62272	FBgn0266638	0
Doe38540	FBgn0039319	0
Doe64863	FBgn0032398	0
Doe71193	FBgn0264330	0
Doe44166	FBgn0264987	0
Doe16655	FBgn0036471	0
Doe21405	FBgn0034907	0
Doe83817	FBgn0030660	0
Doe57701	FBgn0263001	0
Doe63589	FBgn0086357	0
Doe77495	FBgn0032075	0
Doe29415	FBgn0262009	0
Doe44950	FBgn0041588	0
Doe11708	FBgn0053766	0
Doe66661	FBgn0039742	0
Doe26381	FBgn0033601	0
Doe46271	FBgn0010043	0
Doe2776	FBgn0267818	0
Doe83991	FBgn0030715	0
Doe80850	FBgn0038453	0
Doe41055	FBgn0040694	0
Doe28554	FBgn0261618	0
Doe1171	FBgn0267126	0
Doe49894	FBgn0027376	0
Doe36326	FBgn0036000	0
Doe33844	FBgn0016756	0
Doe1446	FBgn0267013	0
Doe37066	FBgn0039774	0
Doe4374	FBgn0040373	0
Doe39982	FBgn0040273	0
Doe19101	FBgn0034045	0
Doe82610	FBgn0030500	0
Doe57418	FBgn0262967	0
Doe72810	FBgn0037456	0
Doe78673	FBgn0032153	0
Doe74553	FBgn0250746	0
Doe38245	FBgn0039431	0
Doe62476	FBgn0266317	0
Doe23920	FBgn0265529	0
Doe61098	FBgn0027657	0
Doe36782	FBgn0050075	0
Doe31169	FBgn0037878	0
Doe54402	FBgn0004657	0
Doe67584	FBgn0051004	0
Doe49798	FBgn0026533	0
Doe30967	FBgn0003042	0
Doe72214	FBgn0035165	0
Doe69791	FBgn0052354	0
Doe33866	FBgn0016977	0
Doe59119	FBgn0031971	0
Doe6558	FBgn0000567	0
Doe48872	FBgn0025456	0
Doe41986	FBgn0053341	0
Doe38573	FBgn0039326	0
Doe36331	FBgn0035964	0
Doe79146	FBgn0032638	0
Doe52325	FBgn0029851	0
Doe33935	FBgn0011217	0
Doe46122	FBgn0011300	0
Doe2221	FBgn0267284	0
Doe9949	FBgn0037106	0
Doe7279	FBgn0004379	0
Doe33363	FBgn0030995	0
Doe37143	FBgn0001319	0
Doe67884	FBgn0050369	0
Doe33754	FBgn0020277	0
Doe28013	FBgn0032957	0
Doe12163	FBgn0069913	0
Doe13600	FBgn0265875	0
Doe24753	FBgn0265765	0
Doe47620	FBgn0017456	0
Doe31771	FBgn0261625	0
Doe27961	FBgn0085447	0
Doe44943	FBgn0041242	0
Doe39634	FBgn0039564	0
Doe72927	FBgn0038449	0
Doe22924	FBgn0037956	0
Doe64574	FBgn0032921	0
Doe70032	FBgn0052074	0
Doe63872	FBgn0054021	0
Doe25640	FBgn0035736	0
Doe1555	FBgn0266983	0
Doe28122	FBgn0039367	0
Doe81260	FBgn0032882	0
Doe83339	FBgn0030384	0
Doe50351	FBgn0026192	0
Doe21161	FBgn0035033	0
Doe24007	FBgn0265450	0
Doe62431	FBgn0266321	0
Doe39792	FBgn0040089	0
Doe54336	FBgn0004854	0
Doe44222	FBgn0265001	0
Doe18698	FBgn0034196	0
Doe9069	FBgn0036979	0
Doe5811	FBgn0002552	0
Doe70612	FBgn0263625	0
Doe10930	FBgn0037430	0
Doe75316	FBgn0031126	0
Doe46053	FBgn0011570	0
Doe56285	FBgn0261267	0
Doe64559	FBgn0032858	0
Doe35182	FBgn0035294	0
Doe67104	FBgn0037670	0
Doe64170	FBgn0067779	0
Doe58803	FBgn0267985	0
Doe78254	FBgn0032365	0
Doe248	scrambled	0
Doe77261	FBgn0031959	0
Doe35186	FBgn0035295	0
Doe44479	FBgn0044046	0
Doe21027	FBgn0035047	0
Doe71119	FBgn0264295	0
Doe37983	FBgn0000405	0
Doe24449	FBgn0265724	0
Doe71508	FBgn0263829	0
Doe27805	FBgn0033775	0
Doe76548	FBgn0031701	0
Doe65728	FBgn0033724	0
Doe67478	FBgn0050423	0
Doe10168	FBgn0037127	0
Doe29423	FBgn0261990	0
Doe26904	FBgn0033395	0
Doe4854	FBgn0000499	0
Doe37588	FBgn0031030	0
Doe12694	FBgn0052523	0
Doe23282	FBgn0037999	1
Doe61320	FBgn0266142	1
Doe13150	FBgn0051115	1
Doe2511	FBgn0267323	1
Doe71813	FBgn0263850	1
Doe1956	FBgn0267478	1
Doe70519	FBgn0263407	1
Doe13612	FBgn0265925	1
Doe28673	FBgn0261555	1
Doe55171	FBgn0260450	1
Doe11316	FBgn0061492	1
Doe12757	FBgn0085273	1
Doe29659	FBgn0263110	1
Doe3733	FBgn0037592	1
Doe44069	FBgn0265046	1
Doe58634	FBgn0267944	1
Doe33669	FBgn0015372	1
Doe32716	FBgn0028646	1
Doe37303	FBgn0265003	1
Doe78060	FBgn0032286	1
Doe72116	FBgn0035585	1
Doe671	FBgn0266745	1
Doe82041	FBgn0033341	1
Doe37471	FBgn0028497	1
Doe14593	FBgn0038730	1
Doe48864	FBgn0025463	1
Doe45025	FBgn0050036	1
Doe25113	FBgn0035473	1
Doe6282	FBgn0001995	1
Doe53581	FBgn0003462	1
Doe54460	FBgn0005642	1
Doe16704	FBgn0036419	1
Doe59291	FBgn0026575	1
Doe2125	FBgn0267548	1
Doe65902	FBgn0261791	1
Doe7265	FBgn0004864	1
Doe76855	FBgn0031535	1
Doe10484	FBgn0037606	1
Doe52375	FBgn0029596	1
Doe145	FBgn0264291	1
Doe15840	FBgn0036159	1
Doe50821	FBgn0027538	1
Doe59778	FBgn0037057	1
Doe46288	FBgn0010038	1
Doe68405	FBgn0051454	1
Doe17079	FBgn0036271	1
Doe78688	FBgn0032154	1
Doe7883	FBgn0003447	1
Doe36856	FBgn0054010	1
Doe14556	FBgn0038732	1
Doe16342	FBgn0035980	1
Doe40065	FBgn0039852	1
Doe78829	FBgn0032595	1
Doe61668	FBgn0265945	1
Doe49975	FBgn0027073	1
Doe23944	FBgn0265512	1
Doe22391	FBgn0037760	1
Doe7541	FBgn0005619	1
Doe2968	FBgn0267633	1
Doe79792	FBgn0038424	1
Doe1457	FBgn0267018	1
Doe41503	FBgn0052786	1
Doe62674	FBgn0266404	1
Doe15866	FBgn0035851	1
Doe11445	FBgn0053752	1
Doe41426	FBgn0053052	1
Doe24270	FBgn0265905	1
Doe56493	FBgn0261289	1
Doe59995	FBgn0000114	1
Doe48105	FBgn0022893	1
Doe35138	FBgn0035590	1
Doe51521	FBgn0029091	1
Doe15129	FBgn0039200	1
Doe60095	FBgn0011206	1
Doe26553	FBgn0033667	1
Doe11580	FBgn0053653	1
Doe25628	FBgn0035743	1
Doe19366	FBgn0034097	1
Doe53160	FBgn0029979	1
Doe38421	FBgn0039491	1
Doe21101	FBgn0035027	1
Doe82531	FBgn0033141	1
Doe70397	FBgn0263456	1
Doe11778	FBgn0053783	1
Doe65670	FBgn0033889	1
Doe27205	FBgn0033865	1
Doe30096	FBgn0261112	1
Doe16376	FBgn0036381	1
Doe44644	FBgn0041160	1
Doe69400	FBgn0051717	1
Doe12192	FBgn0067864	1
Doe1549	FBgn0266981	1
Doe74650	FBgn0086900	1
Doe10053	FBgn0037061	1
Doe428	FBgn0266848	1
Doe10234	FBgn0037130	1
Doe62273	FBgn0266638	1
Doe27065	FBgn0033497	1
Doe64161	FBgn0085196	1
Doe55919	FBgn0261526	1
Doe51089	FBgn0027592	1
Doe39343	FBgn0039630	1
Doe43968	FBgn0264885	1
Doe44964	FBgn0041623	1
Doe45382	FBgn0045486	1
Doe32295	FBgn0029992	1
Doe66861	FBgn0266986	1
Doe53584	FBgn0003480	1
Doe20776	FBgn0034585	1
Doe10357	FBgn0037503	1
Doe82146	FBgn0033287	1
Doe62526	FBgn0266429	1
Doe59196	FBgn0031114	1
Doe72368	FBgn0032229	1
Doe65504	FBgn0033296	1
Doe44521	FBgn0043043	1
Doe41307	FBgn0052647	1
Doe29655	FBgn0262976	1
Doe5700	FBgn0002629	1
Doe11189	FBgn0054011	1
Doe75642	FBgn0030979	1
Doe34049	FBgn0010750	1
Doe20979	FBgn0034671	1
Doe45845	FBgn0011207	1
Doe64181	FBgn0082582	1
Doe68091	FBgn0051343	1
Doe36552	FBgn0036449	1
Doe40654	FBgn0040931	1
Doe71062	FBgn0263322	1
Doe16550	FBgn0036359	1
Doe65760	FBgn0033698	1
Doe77240	FBgn0031974	1
Doe13946	FBgn0264512	1
Doe60987	FBgn0261552	1
Doe22728	FBgn0038156	1
Doe39272	FBgn0039620	1
Doe22682	FBgn0038080	1
Doe13514	FBgn0266329	1
Doe76633	FBgn0031716	1
Doe14564	FBgn0038733	1
Doe56277	FBgn0261258	1
Doe19386	FBgn0034084	1
Doe19519	FBgn0034502	1
Doe49044	FBgn0025185	1
Doe52692	FBgn0029689	1
Doe29656	FBgn0263108	1
Doe15854	FBgn0036191	1
Doe68501	FBgn0051161	1
Doe20288	FBgn0034804	1
Doe2075	FBgn0267589	1
Doe4652	FBgn0039665	1
Doe10569	FBgn0037566	1
Doe52851	FBgn0030066	1
Doe14623	FBgn0038735	1
Doe63354	FBgn0051075	1
Doe56481	FBgn0261456	1
Doe64111	FBgn0085446	1
Doe43686	FBgn0265253	1
Doe57549	FBgn0263034	1
Doe26312	FBgn0035617	1
Doe27313	FBgn0033973	1
Doe57775	FBgn0262741	1
Doe25211	FBgn0035205	1
Doe53600	FBgn0003483	1
Doe42100	FBgn0053325	1
Doe5642	FBgn0002609	1
Doe31215	FBgn0265630	1
Doe42583	FBgn0053286	1
Doe53882	FBgn0003124	1
Doe68156	FBgn0051281	1
Doe15110	FBgn0039271	1
Doe52359	FBgn0029588	1
Doe46746	FBgn0014868	1
Doe41531	FBgn0052850	1
Doe62943	FBgn0052626	1
Doe20161	FBgn0034382	1
Doe45708	FBgn0046294	1
Doe29442	FBgn0261934	1
Doe57842	FBgn0262679	1
Doe6050	FBgn0001189	1
Doe35452	FBgn0034925	1
Doe40040	FBgn0039857	1
Doe69648	FBgn0052250	1
Doe73377	FBgn0036868	1
Doe53307	FBgn0030029	1
Doe4754	FBgn0039487	1
Doe59408	FBgn0025808	1
Doe12864	FBgn0062442	1
Doe20153	FBgn0034381	1
Doe340	FBgn0266900	1
Doe19983	FBgn0034312	1
Doe65685	FBgn0033636	1
Doe56324	FBgn0260969	1
Doe8500	FBgn0036496	1
Doe78488	FBgn0032085	1
Doe63475	FBgn0086695	1
Doe71919	FBgn0034572	1
Doe2743	FBgn0267821	1
Doe80012	FBgn0038221	1
Doe43458	FBgn0264515	1
Doe75699	FBgn0030994	1
Doe30044	FBgn0261625	1
Doe42856	FBgn0264700	1
Doe36996	FBgn0003435	1
Doe15811	FBgn0036176	1
Doe50977	FBgn0027512	1
Doe13843	FBgn0260643	1
Doe33010	FBgn0031628	1
Doe8643	FBgn0036553	1
Doe60137	FBgn0036764	1
Doe41330	FBgn0052693	1
Doe53546	FBgn0003886	1
Doe28643	FBgn0261625	1
Doe12878	FBgn0083121	1
Doe3449	FBgn0038257	1
Doe64862	FBgn0032388	1
Doe2519	FBgn0267330	1
Doe54427	FBgn0004852	1
Doe40118	FBgn0039868	1
Doe80881	FBgn0038551	1
Doe29545	FBgn0261703	1
Doe57696	FBgn0263022	1
Doe51050	FBgn0027868	1
Doe19878	FBgn0034330	1
Doe65651	FBgn0033846	1
Doe13513	FBgn0266329	1
Doe20063	FBgn0034419	1
Doe22324	FBgn0037650	1
Doe43886	FBgn0264943	1
Doe62821	FBgn0051460	1
Doe47244	FBgn0011787	1
Doe39190	FBgn0039766	1
Doe81415	FBgn0032997	1
Doe2579	FBgn0267749	1
Doe50396	FBgn0026313	1
Doe56146	FBgn0261631	1
Doe62925	FBgn0052590	1
Doe38969	FBgn0039755	1
Doe257	intergenic	1
Doe34431	FBgn0025633	1
Doe64393	FBgn0032643	1
Doe4230	FBgn0039938	1
Doe37834	FBgn0265536	1
Doe34046	FBgn0010607	1
Doe17044	FBgn0036282	1
Doe55058	FBgn0260744	1
Doe60763	FBgn0010611	1
Doe9986	FBgn0037027	1
Doe22713	FBgn0038074	1
Doe76229	FBgn0031208	1
Doe11462	FBgn0053757	1
Doe15874	FBgn0036181	1
Doe15445	FBgn0039102	1
Doe16548	FBgn0036352	1
Doe4775	FBgn0039411	1
Doe41670	FBgn0052412	1
Doe78192	FBgn0032244	1
Doe31017	FBgn0040396	1
Doe54692	FBgn0004397	1
Doe74737	FBgn0087013	1
Doe30037	FBgn0261550	1
Doe6959	FBgn0266897	1
Doe40071	FBgn0039854	1
Doe15363	FBgn0039006	1
Doe34337	FBgn0026176	1
Doe74491	FBgn0259701	1
Doe54520	FBgn0008651	1
Doe10233	FBgn0037130	1
Doe69770	FBgn0052199	1
Doe42115	FBgn0053306	1
Doe9879	FBgn0037094	1
Doe12797	FBgn0086768	1
Doe78627	FBgn0032200	1
Doe34156	FBgn0013983	1
Doe40310	FBgn0039970	1
Doe64058	FBgn0085419	1
Doe842	FBgn0266725	1
Doe55356	FBgn0260771	1
Doe617	FBgn0266937	1
Doe27421	FBgn0033921	1
Doe59634	FBgn0028871	1
Doe9956	FBgn0037107	1
Doe78483	FBgn0032084	1
Doe25731	FBgn0035703	1
Doe81844	FBgn0033257	1
Doe69417	FBgn0051661	1
Doe33699	FBgn0017561	1
Doe53047	FBgn0030191	1
Doe53856	FBgn0003983	1
Doe31283	FBgn0013678	1
Doe6675	FBgn0002774	1
Doe14093	FBgn0038893	1
Doe53850	FBgn0003979	1
Doe33808	FBgn0016070	1
Doe39053	FBgn0039726	1
Doe65457	FBgn0033437	1
Doe27343	FBgn0033988	1
Doe65778	FBgn0027079	1
Doe47295	FBgn0011836	1
Doe74004	FBgn0085383	1
Doe67898	FBgn0050383	1
Doe75765	FBgn0031419	1
Doe44558	FBgn0043005	1
Doe15882	FBgn0036184	1
Doe31898	FBgn0259238	1
Doe63182	FBgn0045469	1
Doe39569	FBgn0039656	1
Doe42035	FBgn0053461	1
Doe76094	FBgn0031239	1
Doe75723	FBgn0031399	1
Doe50196	FBgn0025835	1
Doe23607	FBgn0265649	1
Doe55656	FBgn0260226	1
Doe82735	FBgn0030440	1
Doe82588	FBgn0033149	1
Doe59696	FBgn0040299	1
Doe38741	FBgn0039419	1
Doe54504	FBgn0005642	1
Doe29404	FBgn0033362	1
Doe23102	FBgn0038013	1
Doe20187	FBgn0034413	1
Doe45803	FBgn0011204	1
Doe58449	FBgn0015359	2
Doe55664	FBgn0260233	2
Doe43457	FBgn0264515	2
Doe80957	FBgn0038565	2
Doe18832	FBgn0034180	2
Doe44883	FBgn0041712	2
Doe73611	FBgn0086680	2
Doe1085	FBgn0267153	2
Doe80189	FBgn0038279	2
Doe54522	FBgn0008651	2
Doe10421	FBgn0037513	2
Doe11876	FBgn0085199	2
Doe12121	FBgn0085265	2
Doe57869	FBgn0262610	2
Doe35405	FBgn0035268	2
Doe46491	FBgn0010313	2
Doe49939	FBgn0026874	2
Doe44727	FBgn0040996	2
Doe29348	FBgn0037655	2
Doe80707	FBgn0038478	2
Doe40514	FBgn0040718	2
Doe26495	FBgn0033581	2
Doe2758	FBgn0267821	2
Doe8398	FBgn0036550	2
Doe54774	FBgn0004181	2
Doe2497	FBgn0267305	2
Doe50696	FBgn0028481	2
Doe83202	FBgn0030421	2
Doe37869	FBgn0263490	2
Doe5141	FBgn0000594	2
Doe62376	FBgn0266363	2
Doe36752	FBgn0024957	2
Doe79278	FBgn0032372	2
Doe60574	FBgn0024273	2
Doe12114	FBgn0085254	2
Doe56130	FBgn0261627	2
Doe82783	FBgn0030468	2
Doe57508	FBgn0262944	2
Doe83755	FBgn0030855	2
Doe46165	FBgn0010238	2
Doe57694	FBgn0263022	2
Doe4471	FBgn0039249	2
Doe32838	FBgn0031068	2
Doe62887	FBgn0051547	2
Doe56319	FBgn0260968	2
Doe48024	FBgn0015546	2
Doe40593	FBgn0040729	2
Doe77746	FBgn0031769	2
Doe62691	FBgn0266400	2
Doe41895	FBgn0052507	2
Doe78382	FBgn0032311	2
Doe22132	FBgn0037855	2
Doe39865	FBgn0040323	2
Doe55128	FBgn0260756	2
Doe73294	FBgn0036882	2
Doe38054	FBgn0263987	2
Doe27978	FBgn0052269	2
Doe55750	FBgn0259971	2
Doe78744	FBgn0032167	2
Doe8676	FBgn0036581	2
Doe36683	FBgn0013323	2
Doe32283	FBgn0030037	2
Doe10694	FBgn0037418	2
Doe12523	FBgn0083962	2
Doe67234	FBgn0035247	2
Doe14347	FBgn0038980	2
Doe81070	FBgn0038531	2
Doe2313	FBgn0267244	2
Doe35964	FBgn0036844	2
Doe43362	FBgn0264569	2
Doe42934	FBgn0264841	2
Doe13543	FBgn0266722	2
Doe32343	FBgn0030060	2
Doe16910	FBgn0036219	2
Doe41711	FBgn0052441	2
Doe67323	FBgn0050443	2
Doe75703	FBgn0031398	2
Doe82139	FBgn0033283	2
Doe68538	FBgn0051098	2
Doe79003	FBgn0032652	2
Doe72641	FBgn0037916	2
Doe27563	FBgn0033751	2
Doe9114	FBgn0036787	2
Doe66982	FBgn0032886	2
Doe36324	FBgn0035975	2
Doe19347	FBgn0034143	2
Doe22053	FBgn0037846	2
Doe70268	FBgn0052091	2
Doe70599	FBgn0263653	2
Doe52244	FBgn0029835	2
Doe29264	FBgn0066101	2
Doe62530	FBgn0266421	2
Doe18249	FBgn0028956	2
Doe64417	FBgn0032587	2
Doe3617	FBgn0038686	2
Doe56450	FBgn0261506	2
Doe26448	FBgn0033570	2
Doe26570	FBgn0033677	2
Doe27078	FBgn0033498	2
Doe20386	FBgn0034761	2
Doe12945	FBgn0040602	2
Doe24978	FBgn0035393	2
Doe51358	FBgn0028986	2
Doe64861	FBgn0032388	2
Doe79313	FBgn0032400	2
Doe18534	FBgn0264895	2
Doe13115	FBgn0051198	2
Doe2732	FBgn0267736	2
Doe65423	FBgn0033473	2
Doe9530	FBgn0037255	2
Doe78551	FBgn0032109	2
Doe7306	FBgn0004368	2
Doe82054	FBgn0033347	2
Doe5415	FBgn0000045	2
Doe51136	FBgn0027616	2
Doe60178	FBgn0036608	2
Doe50539	FBgn0027930	2
Doe6601	FBgn0002566	2
Doe13153	FBgn0051053	2
Doe52671	FBgn0029694	2
Doe8701	FBgn0036579	2
Doe27018	FBgn0033471	2
Doe48426	FBgn0023090	2
Doe67500	FBgn0051055	2
Doe5979	FBgn0002887	2
Doe23639	FBgn0265669	2
Doe76710	FBgn0031760	2
Doe8305	FBgn0036712	2
Doe14371	FBgn0038941	2
Doe63544	FBgn0086784	2
Doe13090	FBgn0040064	2
Doe9263	FBgn0036780	2
Doe46303	FBgn0010100	2
Doe38661	FBgn0039310	2
Doe72655	FBgn0038035	2
Doe81535	FBgn0032748	2
Doe51634	FBgn0028704	2
Doe2879	FBgn0267782	2
Doe62097	FBgn0266568	2
Doe41705	FBgn0052413	2
Doe46531	FBgn0010342	2
Doe49441	FBgn0023534	2
Doe1826	FBgn0267482	2
Doe63470	FBgn0050259	2
Doe47204	FBgn0013469	2
Doe16137	FBgn0035880	2
Doe22837	FBgn0038049	2
Doe83799	FBgn0030624	2
Doe26444	FBgn0033569	2
Doe14778	FBgn0038806	2
Doe39435	FBgn0039591	2
Doe40484	FBgn0040736	2
Doe16644	FBgn0036467	2
Doe83285	FBgn0030366	2
Doe46161	FBgn0010238	2
Doe34958	FBgn0023441	2
Doe2552	FBgn0267322	2
Doe4513	FBgn0039341	2
Doe80853	FBgn0038455	2
Doe44573	FBgn0043458	2
Doe32980	FBgn0031661	2
Doe7451	FBgn0010288	2
Doe78251	FBgn0032362	2
Doe5732	FBgn0002524	2
Doe22701	FBgn0038071	2
Doe25619	FBgn0035750	2
Doe17619	FBgn0283473	2
Doe55738	FBgn0259977	2
Doe18476	FBgn0036451	2
Doe8103	FBgn0036624	2
Doe1199	FBgn0267146	2
Doe56313	FBgn0260995	2
Doe43331	FBgn0264598	2
Doe77217	FBgn0031597	2
Doe58706	FBgn0283461	2
Doe74269	FBgn0259166	2
Doe50849	FBgn0027574	2
Doe18668	FBgn0262582	2
Doe10687	FBgn0037417	2
Doe84015	FBgn0030737	2
Doe11786	FBgn0085227	2
Doe81914	FBgn0033261	2
Doe51031	FBgn0027784	2
Doe17939	FBgn0265313	2
Doe36750	FBgn0024362	2
Doe36821	FBgn0085512	2
Doe66378	FBgn0283477	2
Doe40932	FBgn0040360	2
Doe43404	FBgn0264496	2
Doe29845	FBgn0260657	2
Doe80800	FBgn0038439	2
Doe79938	FBgn0038213	2
Doe56530	FBgn0261286	2
Doe41142	FBgn0040623	2
Doe50611	FBgn0028531	2
Doe19296	FBgn0034136	2
Doe74844	FBgn0250833	2
Doe65569	FBgn0033372	2
Doe13977	FBgn0262622	2
Doe9900	FBgn0037087	2
Doe34817	FBgn0020622	2
Doe54707	FBgn0004430	2
Doe8457	FBgn0036484	2
Doe30145	FBgn0261479	2
Doe2710	FBgn0267746	2
Doe8350	FBgn0036527	2
Doe68937	FBgn0051776	2
Doe2017	FBgn0267570	2
Doe7544	FBgn0005632	2
Doe19590	FBgn0034455	2
Doe36472	FBgn0036663	2
Doe36404	FBgn0036576	2
Doe9058	FBgn0036970	2
Doe2045	FBgn0267599	2
Doe83813	FBgn0030658	2
Doe35163	FBgn0035385	2
Doe44025	FBgn0264899	2
Doe56890	FBgn0262513	2
Doe14933	FBgn0039141	2
Doe38264	FBgn0039443	2
Doe57524	FBgn0262898	2
Doe36857	FBgn0054010	2
Doe5455	FBgn0000277	2
Doe29754	FBgn0262734	2
Doe14268	FBgn0038972	2
Doe47195	FBgn0013347	2
Doe68525	FBgn0051156	2
Doe1178	FBgn0267125	2
Doe18965	FBgn0034288	2
Doe71281	FBgn0264261	2
Doe58681	FBgn0267935	2
Doe8914	FBgn0036996	2
Doe25939	FBgn0035789	2
Doe49534	FBgn0024956	2
Doe48574	FBgn0020312	2
Doe79507	FBgn0032470	2
Doe18151	FBgn0052772	2
Doe18301	FBgn0264562	2
Doe74520	FBgn0259712	2
Doe83096	FBgn0030297	2
Doe27492	FBgn0033741	2
Doe40540	FBgn0040699	2
Doe14650	FBgn0038846	2
Doe32777	FBgn0031247	2
Doe54959	FBgn0004552	2
Doe43639	FBgn0265089	2
Doe66319	FBgn0266933	2
Doe6835	FBgn0267740	2
Doe23690	FBgn0265418	2
Doe46630	FBgn0014033	2
Doe77285	FBgn0031998	2
Doe9083	FBgn0036959	2
Doe78149	FBgn0032251	2
Doe44790	FBgn0041102	2
Doe50850	FBgn0027578	2
Doe67037	FBgn0010549	2
Doe83110	FBgn0030319	2
Doe14152	FBgn0038915	2
Doe68889	FBgn0051816	2
Doe35194	FBgn0035410	2
Doe65666	FBgn0033886	2
Doe55469	FBgn0259954	2
Doe13729	FBgn0261059	2
Doe46819	FBgn0015011	2
Doe60370	FBgn0031148	2
Doe26763	FBgn0033422	2
Doe34122	FBgn0013759	2
Doe18925	FBgn0034274	2
Doe25583	FBgn0035733	2
Doe57155	FBgn0262106	2
Doe734	FBgn0266780	2
Doe44908	FBgn0041245	2
Doe3637	FBgn0038603	2
Doe30457	FBgn0266696	2
Doe61222	FBgn0266162	2
Doe66432	FBgn0283658	2
Doe17084	FBgn0036274	2
Doe74381	FBgn0259714	2
Doe62391	FBgn0266365	2
Doe63646	FBgn0086443	2
Doe9998	FBgn0037039	2
Doe79962	FBgn0038207	2
Doe23023	FBgn0037922	2
Doe55405	FBgn0260817	2
Doe54756	FBgn0004237	2
Doe80381	FBgn0038638	2
Doe68609	FBgn0051104	2
Doe16294	FBgn0035954	2
Doe13280	FBgn0051643	2
Doe44126	FBgn0265065	2
Doe45516	FBgn0044452	2
Doe66533	FBgn0259838	2
Doe13805	FBgn0259099	2
Doe24438	FBgn0265736	2
Doe43366	FBgn0264572	2
Doe11307	FBgn0061200	2
Doe9046	FBgn0036948	2
Doe47358	FBgn0016122	2
Doe46637	FBgn0013755	2
Doe51373	FBgn0029121	2
Doe11259	FBgn0064766	2
Doe4183	FBgn0039858	2
Doe4685	FBgn0039640	2
Doe34796	FBgn0020370	2
Doe37577	FBgn0030744	2
Doe75600	FBgn0031031	2
Doe37985	FBgn0000405	2
Doe80398	FBgn0038643	2
Doe14054	FBgn0262840	2
Doe46008	FBgn0011582	2
Doe16449	FBgn0036396	2
Doe75546	FBgn0031003	2
Doe60819	FBgn0017581	2
Doe65959	FBgn0029713	2
Doe54383	FBgn0004780	2
Doe75674	FBgn0031000	2
Doe76128	FBgn0031238	2
Doe79814	FBgn0038416	2
Doe83430	FBgn0030826	2
Doe56413	FBgn0261393	2
Doe52327	FBgn0029851	2
Doe58649	FBgn0267944	2
Doe25661	FBgn0035743	2
Doe33618	FBgn0015024	3
Doe60823	FBgn0003651	3
Doe66559	FBgn0085434	3
Doe63728	FBgn0259749	3
Doe73478	FBgn0085505	3
Doe33686	FBgn0015239	3
Doe10754	FBgn0037359	3
Doe21994	FBgn0037879	3
Doe29369	FBgn0029939	3
Doe62390	FBgn0266365	3
Doe44758	FBgn0041102	3
Doe51348	FBgn0028920	3
Doe33071	FBgn0031434	3
Doe12317	FBgn0067311	3
Doe49880	FBgn0027359	3
Doe47432	FBgn0015834	3
Doe9820	FBgn0037296	3
Doe46647	FBgn0013749	3
Doe23757	FBgn0265382	3
Doe71930	FBgn0034664	3
Doe33357	FBgn0030839	3
Doe63701	FBgn0259219	3
Doe64684	FBgn0032029	3
Doe83383	FBgn0030804	3
Doe53081	FBgn0030224	3
Doe14733	FBgn0038853	3
Doe55222	FBgn0260482	3
Doe3049	FBgn0267606	3
Doe35084	FBgn0035505	3
Doe14108	FBgn0038897	3
Doe29810	FBgn0260742	3
Doe23806	FBgn0265310	3
Doe8916	FBgn0036996	3
Doe77667	FBgn0031818	3
Doe11106	FBgn0054052	3
Doe65122	FBgn0033252	3
Doe63989	FBgn0053094	3
Doe16833	FBgn0036246	3
Doe54303	FBgn0004867	3
Doe25480	FBgn0035263	3
Doe5948	FBgn0002736	3
Doe49520	FBgn0024944	3
Doe74313	FBgn0259189	3
Doe914	FBgn0266835	3
Doe79134	FBgn0032635	3
Doe81362	FBgn0032972	3
Doe83520	FBgn0030790	3
Doe36522	FBgn0036272	3
Doe8510	FBgn0036498	3
Doe79447	FBgn0032449	3
Doe27133	FBgn0033883	3
Doe56512	FBgn0261283	3
Doe31641	FBgn0264298	3
Doe25644	FBgn0035735	3
Doe66111	FBgn0026751	3
Doe6722	FBgn0001235	3
Doe36635	FBgn0033327	3
Doe9681	FBgn0037313	3
Doe60376	FBgn0031117	3
Doe25546	FBgn0035272	3
Doe23478	FBgn0265640	3
Doe5285	FBgn0000158	3
Doe58752	FBgn0023197	3
Doe10758	FBgn0037363	3
Doe21834	FBgn0037826	3
Doe38396	FBgn0039552	3
Doe52246	FBgn0029834	3
Doe47164	FBgn0013308	3
Doe9695	FBgn0037322	3
Doe56519	FBgn0261285	3
Doe18919	FBgn0034275	3
Doe68262	FBgn0051477	3
[truncated: 82,139 more rows]

## Sheet: S2C fraction
Row Labels	Count of sgRNA	fraction	sum
0	1282	0.0152369	0.0152369
1	322	0.00382705	0.0190639
2	323	0.00383893	0.0229029
3	326	0.00387459	0.0267774
4	331	0.00393401	0.0307115
5	362	0.00430246	0.0350139
6	363	0.00431434	0.0393282
7	380	0.00451639	0.0438446
8	379	0.0045045	0.0483491
9	394	0.00468278	0.0530319
10	381	0.00452827	0.0575602
11	392	0.00465901	0.0622192
12	428	0.00508688	0.0673061
13	409	0.00486106	0.0721672
14	407	0.00483729	0.0770044
15	425	0.00505123	0.0820557
16	417	0.00495614	0.0870118
17	443	0.00526516	0.092277
18	459	0.00545532	0.0977323
19	435	0.00517008	0.102902
20	464	0.00551475	0.108417
21	451	0.00536024	0.113777
22	429	0.00509877	0.118876
23	463	0.00550286	0.124379
24	459	0.00545532	0.129834
25	430	0.00511065	0.134945
26	465	0.00552663	0.140472
27	465	0.00552663	0.145998
28	452	0.00537213	0.15137
29	447	0.0053127	0.156683
30	440	0.0052295	0.161913
31	468	0.00556229	0.167475
32	451	0.00536024	0.172835
33	462	0.00549098	0.178326
34	453	0.00538401	0.18371
35	454	0.0053959	0.189106
36	478	0.00568114	0.194787
37	475	0.00564549	0.200433
38	497	0.00590696	0.20634
39	456	0.00541967	0.211759
40	496	0.00589508	0.217654
41	499	0.00593073	0.223585
42	449	0.00533647	0.228922
43	440	0.0052295	0.234151
44	491	0.00583565	0.239987
45	461	0.00547909	0.245466
46	456	0.00541967	0.250885
47	465	0.00552663	0.256412
48	435	0.00517008	0.261582
49	473	0.00562172	0.267204
50	467	0.00555041	0.272754
51	438	0.00520573	0.27796
52	489	0.00581188	0.283772
53	470	0.00558606	0.289358
54	466	0.00553852	0.294896
55	481	0.0057168	0.300613
56	454	0.0053959	0.306009
57	398	0.00473032	0.310739
58	470	0.00558606	0.316326
59	430	0.00511065	0.321436
60	433	0.00514631	0.326583
61	475	0.00564549	0.332228
62	443	0.00526516	0.337493
63	449	0.00533647	0.34283
64	415	0.00493237	0.347762
65	436	0.00518196	0.352944
66	402	0.00477786	0.357722
67	413	0.0049086	0.36263
68	460	0.00546721	0.368098
69	369	0.00438565	0.372483
70	422	0.00501557	0.377499
71	430	0.00511065	0.38261
72	396	0.00470655	0.387316
73	413	0.0049086	0.392225
74	415	0.00493237	0.397157
75	419	0.00497991	0.402137
76	439	0.00521762	0.407355
77	435	0.00517008	0.412525
78	434	0.00515819	0.417683
79	439	0.00521762	0.4229
80	376	0.00446885	0.427369
81	440	0.0052295	0.432599
82	384	0.00456393	0.437163
83	402	0.00477786	0.441941
84	418	0.00496803	0.446909
85	371	0.00440942	0.451318
86	349	0.00414795	0.455466
87	378	0.00449262	0.459959
88	379	0.0045045	0.464463
89	357	0.00424303	0.468706
90	378	0.00449262	0.473199
91	357	0.00424303	0.477442
92	352	0.0041836	0.481625
93	381	0.00452827	0.486154
94	367	0.00436188	0.490516
95	357	0.00424303	0.494759
96	354	0.00420737	0.498966
97	341	0.00405287	0.503019
98	324	0.00385082	0.50687
99	315	0.00374385	0.510614
100	334	0.00396967	0.514583
101	336	0.00399344	0.518577
102	324	0.00385082	0.522427
103	336	0.00399344	0.526421
104	305	0.003625	0.530046
105	343	0.00407664	0.534123
106	301	0.00357746	0.5377
107	330	0.00392213	0.541622
108	333	0.00395778	0.54558
109	299	0.00355369	0.549134
110	302	0.00358934	0.552723
111	307	0.00364877	0.556372
112	321	0.00381516	0.560187
113	321	0.00381516	0.564002
114	311	0.00369631	0.567698
115	314	0.00373196	0.57143
116	323	0.00383893	0.575269
117	301	0.00357746	0.578847
118	298	0.0035418	0.582388
119	301	0.00357746	0.585966
120	283	0.00336352	0.589329
121	285	0.00338729	0.592717
122	275	0.00326844	0.595985
123	298	0.0035418	0.599527
124	286	0.00339918	0.602926
125	286	0.00339918	0.606325
126	252	0.00299508	0.60932
127	272	0.00323278	0.612553
128	274	0.00325655	0.61581
129	266	0.00316147	0.618971
130	272	0.00323278	0.622204
131	254	0.00301885	0.625223
132	258	0.00306639	0.628289
133	250	0.00297131	0.631261
134	227	0.00269795	0.633958
135	267	0.00317336	0.637132
136	267	0.00317336	0.640305
137	250	0.00297131	0.643277
138	258	0.00306639	0.646343
139	245	0.00291188	0.649255
140	266	0.00316147	0.652416
141	240	0.00285246	0.655269
142	242	0.00287623	0.658145
143	237	0.0028168	0.660962
144	240	0.00285246	0.663814
145	245	0.00291188	0.666726
146	229	0.00272172	0.669448
147	237	0.0028168	0.672265
148	234	0.00278115	0.675046
149	202	0.00240082	0.677447
150	211	0.00250778	0.679954
151	221	0.00262664	0.682581
152	213	0.00253156	0.685113
153	213	0.00253156	0.687644
154	213	0.00253156	0.690176
155	230	0.0027336	0.692909
156	215	0.00255533	0.695465
157	240	0.00285246	0.698317
158	214	0.00254344	0.70086
159	221	0.00262664	0.703487
160	208	0.00247213	0.705959
161	207	0.00246024	0.70842
162	211	0.00250778	0.710927
163	217	0.0025791	0.713506
164	191	0.00227008	0.715776
165	203	0.0024127	0.718189
166	184	0.00218688	0.720376
167	189	0.00224631	0.722622
168	176	0.0020918	0.724714
169	202	0.00240082	0.727115
170	202	0.00240082	0.729516
171	209	0.00248401	0.732
172	185	0.00219877	0.734199
173	179	0.00212746	0.736326
174	182	0.00216311	0.738489
175	186	0.00221065	0.7407
176	175	0.00207992	0.74278
177	178	0.00211557	0.744895
178	182	0.00216311	0.747058
179	168	0.00199672	0.749055
180	204	0.00242459	0.75148
181	164	0.00194918	0.753429
182	174	0.00206803	0.755497
183	171	0.00203238	0.757529
184	175	0.00207992	0.759609
185	164	0.00194918	0.761558
186	177	0.00210369	0.763662
187	151	0.00179467	0.765457
188	174	0.00206803	0.767525
189	179	0.00212746	0.769652
190	160	0.00190164	0.771554
191	177	0.00210369	0.773658
192	162	0.00192541	0.775583
193	161	0.00191352	0.777496
194	146	0.00173524	0.779232
195	136	0.00161639	0.780848
196	147	0.00174713	0.782595
197	160	0.00190164	0.784497
198	162	0.00192541	0.786422
199	146	0.00173524	0.788158
200	161	0.00191352	0.790071
201	146	0.00173524	0.791806
202	138	0.00164016	0.793446
203	141	0.00167582	0.795122
204	125	0.00148565	0.796608
205	145	0.00172336	0.798331
206	138	0.00164016	0.799971
207	135	0.00160451	0.801576
208	123	0.00146188	0.803038
209	137	0.00162828	0.804666
210	140	0.00166393	0.80633
211	122	0.00145	0.80778
212	109	0.00129549	0.809076
213	137	0.00162828	0.810704
214	145	0.00172336	0.812427
215	135	0.00160451	0.814032
216	109	0.00129549	0.815327
217	114	0.00135492	0.816682
218	124	0.00147377	0.818156
219	135	0.00160451	0.81976
220	122	0.00145	0.82121
221	118	0.00140246	0.822613
222	124	0.00147377	0.824087
223	155	0.00184221	0.825929
224	123	0.00146188	0.827391
225	123	0.00146188	0.828853
226	110	0.00130738	0.83016
227	103	0.00122418	0.831384
228	123	0.00146188	0.832846
229	119	0.00141434	0.83426
230	107	0.00127172	0.835532
231	116	0.00137869	0.836911
232	119	0.00141434	0.838325
233	96	0.00114098	0.839466
234	101	0.00120041	0.840667
235	122	0.00145	0.842117
236	102	0.00121229	0.843329
237	98	0.00116475	0.844494
238	101	0.00120041	0.845694
239	94	0.00111721	0.846811
240	114	0.00135492	0.848166
241	101	0.00120041	0.849367
242	105	0.00124795	0.850614
243	105	0.00124795	0.851862
244	117	0.00139057	0.853253
245	108	0.00128361	0.854537
246	108	0.00128361	0.85582
247	100	0.00118852	0.857009
248	115	0.0013668	0.858376
249	80	0.000950819	0.859326
250	86	0.00102213	0.860348
251	97	0.00115287	0.861501
252	87	0.00103402	0.862535
253	101	0.00120041	0.863736
254	72	0.000855737	0.864592
255	77	0.000915163	0.865507
256	86	0.00102213	0.866529
257	83	0.000986475	0.867515
258	122	0.00145	0.868965
259	79	0.000938934	0.869904
260	88	0.0010459	0.87095
261	88	0.0010459	0.871996
262	93	0.00110533	0.873101
263	84	0.00099836	0.8741
264	80	0.000950819	0.875051
265	82	0.000974589	0.876025
266	89	0.00105779	0.877083
267	65	0.00077254	0.877855
268	93	0.00110533	0.878961
269	87	0.00103402	0.879995
270	70	0.000831967	0.880827
271	75	0.000891393	0.881718
272	79	0.000938934	0.882657
273	76	0.000903278	0.88356
274	85	0.00101025	0.884571
275	90	0.00106967	0.88564
276	76	0.000903278	0.886544
277	64	0.000760655	0.887304
278	53	0.000629918	0.887934
279	59	0.000701229	0.888635
280	59	0.000701229	0.889337
281	79	0.000938934	0.890275
282	80	0.000950819	0.891226
283	72	0.000855737	0.892082
284	80	0.000950819	0.893033
285	72	0.000855737	0.893889
286	66	0.000784426	0.894673
287	76	0.000903278	0.895576
288	78	0.000927048	0.896503
289	60	0.000713114	0.897216
290	67	0.000796311	0.898013
291	70	0.000831967	0.898845
292	71	0.000843852	0.899689
293	57	0.000677458	0.900366
294	73	0.000867622	0.901234
295	60	0.000713114	0.901947
296	65	0.00077254	0.902719
297	60	0.000713114	0.903432
298	65	0.00077254	0.904205
299	57	0.000677458	0.904882
300	55	0.000653688	0.905536
301	62	0.000736885	0.906273
302	60	0.000713114	0.906986
303	59	0.000701229	0.907687
304	68	0.000808196	0.908496
305	46	0.000546721	0.909042
306	72	0.000855737	0.909898
307	59	0.000701229	0.910599
308	56	0.000665573	0.911265
309	64	0.000760655	0.912025
310	56	0.000665573	0.912691
311	52	0.000618032	0.913309
312	52	0.000618032	0.913927
313	39	0.000463524	0.914391
314	47	0.000558606	0.914949
315	49	0.000582377	0.915532
316	63	0.00074877	0.91628
317	52	0.000618032	0.916898
318	47	0.000558606	0.917457
319	56	0.000665573	0.918123
320	49	0.000582377	0.918705
321	50	0.000594262	0.919299
322	57	0.000677458	0.919977
323	43	0.000511065	0.920488
324	56	0.000665573	0.921153
325	42	0.00049918	0.921653
326	57	0.000677458	0.92233
327	53	0.000629918	0.92296
328	47	0.000558606	0.923519
329	42	0.00049918	0.924018
330	64	0.000760655	0.924778
331	54	0.000641803	0.92542
332	43	0.000511065	0.925931
333	50	0.000594262	0.926525
334	44	0.00052295	0.927048
335	48	0.000570491	0.927619
336	54	0.000641803	0.928261
337	44	0.00052295	0.928784
338	32	0.000380328	0.929164
339	46	0.000546721	0.929711
340	31	0.000368442	0.930079
341	41	0.000487295	0.930566
342	35	0.000415983	0.930982
343	39	0.000463524	0.931446
344	42	0.00049918	0.931945
345	29	0.000344672	0.93229
346	42	0.00049918	0.932789
347	50	0.000594262	0.933383
348	35	0.000415983	0.933799
349	41	0.000487295	0.934287
350	34	0.000404098	0.934691
351	35	0.000415983	0.935107
352	35	0.000415983	0.935523
353	36	0.000427869	0.93595
354	46	0.000546721	0.936497
355	29	0.000344672	0.936842
356	39	0.000463524	0.937305
357	42	0.00049918	0.937805
358	45	0.000534836	0.938339
359	39	0.000463524	0.938803
360	37	0.000439754	0.939243
361	41	0.000487295	0.93973
362	48	0.000570491	0.9403
363	30	0.000356557	0.940657
364	34	0.000404098	0.941061
365	32	0.000380328	0.941441
366	32	0.000380328	0.941822
367	46	0.000546721	0.942368
368	47	0.000558606	0.942927
369	35	0.000415983	0.943343
370	25	0.000297131	0.94364
371	22	0.000261475	0.943902
372	32	0.000380328	0.944282
373	29	0.000344672	0.944627
374	40	0.000475409	0.945102
375	31	0.000368442	0.945471
376	27	0.000320901	0.945791
377	30	0.000356557	0.946148
378	20	0.000237705	0.946386
379	33	0.000392213	0.946778
380	28	0.000332787	0.947111
381	38	0.000451639	0.947562
382	23	0.00027336	0.947836
383	32	0.000380328	0.948216
384	24	0.000285246	0.948501
385	31	0.000368442	0.94887
386	21	0.00024959	0.949119
387	31	0.000368442	0.949488
388	30	0.000356557	0.949844
389	22	0.000261475	0.950106
390	24	0.000285246	0.950391
391	30	0.000356557	0.950748
392	26	0.000309016	0.951057
393	22	0.000261475	0.951318
394	25	0.000297131	0.951615
395	23	0.00027336	0.951889
396	24	0.000285246	0.952174
397	20	0.000237705	0.952412
398	26	0.000309016	0.952721
399	31	0.000368442	0.953089
400	26	0.000309016	0.953398
401	19	0.000225819	0.953624
402	24	0.000285246	0.953909
403	30	0.000356557	0.954266
404	24	0.000285246	0.954551
405	23	0.00027336	0.954824
406	16	0.000190164	0.955014
407	18	0.000213934	0.955228
408	27	0.000320901	0.955549
409	26	0.000309016	0.955858
410	33	0.000392213	0.95625
411	25	0.000297131	0.956548
412	27	0.000320901	0.956868
413	30	0.000356557	0.957225
414	26	0.000309016	0.957534
415	20	0.000237705	0.957772
416	24	0.000285246	0.958057
417	24	0.000285246	0.958342
418	13	0.000154508	0.958497
419	32	0.000380328	0.958877
420	23	0.00027336	0.95915
421	22	0.000261475	0.959412
422	31	0.000368442	0.95978
423	18	0.000213934	0.959994
424	16	0.000190164	0.960184
425	20	0.000237705	0.960422
426	20	0.000237705	0.96066
427	15	0.000178279	0.960838
428	18	0.000213934	0.961052
429	15	0.000178279	0.96123
430	23	0.00027336	0.961504
431	25	0.000297131	0.961801
432	19	0.000225819	0.962027
433	14	0.000166393	0.962193
434	18	0.000213934	0.962407
435	25	0.000297131	0.962704
436	20	0.000237705	0.962942
437	18	0.000213934	0.963156
438	19	0.000225819	0.963382
439	18	0.000213934	0.963596
440	16	0.000190164	0.963786
441	17	0.000202049	0.963988
442	18	0.000213934	0.964202
443	17	0.000202049	0.964404
444	17	0.000202049	0.964606
445	24	0.000285246	0.964891
446	14	0.000166393	0.965057
447	16	0.000190164	0.965248
448	19	0.000225819	0.965473
449	15	0.000178279	0.965652
450	15	0.000178279	0.96583
451	18	0.000213934	0.966044
452	23	0.00027336	0.966317
453	16	0.000190164	0.966507
454	21	0.00024959	0.966757
455	15	0.000178279	0.966935
456	16	0.000190164	0.967125
457	11	0.000130738	0.967256
458	14	0.000166393	0.967423
459	13	0.000154508	0.967577
460	20	0.000237705	0.967815
461	12	0.000142623	0.967957
462	20	0.000237705	0.968195
463	17	0.000202049	0.968397
464	15	0.000178279	0.968575
465	18	0.000213934	0.968789
466	16	0.000190164	0.96898
467	18	0.000213934	0.969193
468	16	0.000190164	0.969384
469	13	0.000154508	0.969538
470	13	0.000154508	0.969693
471	15	0.000178279	0.969871
472	14	0.000166393	0.970037
473	14	0.000166393	0.970204
474	11	0.000130738	0.970334
475	21	0.00024959	0.970584
476	9	0.000106967	0.970691
477	17	0.000202049	0.970893
478	12	0.000142623	0.971036
479	14	0.000166393	0.971202
480	15	0.000178279	0.97138
481	10	0.000118852	0.971499
482	14	0.000166393	0.971666
483	10	0.000118852	0.971784
484	12	0.000142623	0.971927
485	10	0.000118852	0.972046
486	15	0.000178279	0.972224
487	10	0.000118852	0.972343
488	6	7.13114e-05	0.972414
489	13	0.000154508	0.972569
490	17	0.000202049	0.972771
491	12	0.000142623	0.972914
492	12	0.000142623	0.973056
493	14	0.000166393	0.973223
494	11	0.000130738	0.973353
495	19	0.000225819	0.973579
496	15	0.000178279	0.973757
497	14	0.000166393	0.973924
498	14	0.000166393	0.97409
499	14	0.000166393	0.974257
500	11	0.000130738	0.974387
501	10	0.000118852	0.974506
502	8	9.50819e-05	0.974601
503	12	0.000142623	0.974744
504	19	0.000225819	0.97497
505	10	0.000118852	0.975089
506	11	0.000130738	0.975219
507	16	0.000190164	0.975409
508	10	0.000118852	0.975528
509	16	0.000190164	0.975718
510	11	0.000130738	0.975849
511	19	0.000225819	0.976075
512	4	4.75409e-05	0.976123
513	14	0.000166393	0.976289
514	13	0.000154508	0.976443
515	15	0.000178279	0.976622
516	14	0.000166393	0.976788
517	13	0.000154508	0.976943
518	8	9.50819e-05	0.977038
519	11	0.000130738	0.977168
520	5	5.94262e-05	0.977228
521	13	0.000154508	0.977382
522	6	7.13114e-05	0.977454
523	7	8.31967e-05	0.977537
524	12	0.000142623	0.97768
525	10	0.000118852	0.977798
526	16	0.000190164	0.977989
527	8	9.50819e-05	0.978084
528	12	0.000142623	0.978226
529	8	9.50819e-05	0.978321
530	8	9.50819e-05	0.978416
531	10	0.000118852	0.978535
532	7	8.31967e-05	0.978618
533	10	0.000118852	0.978737
534	10	0.000118852	0.978856
535	13	0.000154508	0.979011
536	7	8.31967e-05	0.979094
537	9	0.000106967	0.979201
538	10	0.000118852	0.97932
539	10	0.000118852	0.979439
540	12	0.000142623	0.979581
541	18	0.000213934	0.979795
542	11	0.000130738	0.979926
543	8	9.50819e-05	0.980021
544	8	9.50819e-05	0.980116
545	10	0.000118852	0.980235
546	7	8.31967e-05	0.980318
547	12	0.000142623	0.980461
548	9	0.000106967	0.980568
549	9	0.000106967	0.980675
550	6	7.13114e-05	0.980746
551	6	7.13114e-05	0.980817
552	13	0.000154508	0.980972
553	6	7.13114e-05	0.981043
554	11	0.000130738	0.981174
555	8	9.50819e-05	0.981269
556	6	7.13114e-05	0.98134
557	5	5.94262e-05	0.9814
558	8	9.50819e-05	0.981495
559	16	0.000190164	0.981685
560	15	0.000178279	0.981863
561	10	0.000118852	0.981982
562	5	5.94262e-05	0.982041
563	8	9.50819e-05	0.982136
564	10	0.000118852	0.982255
565	12	0.000142623	0.982398
566	10	0.000118852	0.982517
567	3	3.56557e-05	0.982552
568	6	7.13114e-05	0.982624
569	9	0.000106967	0.982731
570	5	5.94262e-05	0.98279
571	7	8.31967e-05	0.982873
572	5	5.94262e-05	0.982933
573	6	7.13114e-05	0.983004
574	13	0.000154508	0.983159
575	5	5.94262e-05	0.983218
576	6	7.13114e-05	0.983289
577	5	5.94262e-05	0.983349
578	4	4.75409e-05	0.983396
579	2	2.37705e-05	0.98342
580	10	0.000118852	0.983539
581	6	7.13114e-05	0.98361
582	3	3.56557e-05	0.983646
583	2	2.37705e-05	0.98367
584	7	8.31967e-05	0.983753
585	6	7.13114e-05	0.983824
586	6	7.13114e-05	0.983896
587	4	4.75409e-05	0.983943
588	11	0.000130738	0.984074
589	5	5.94262e-05	0.984133
590	6	7.13114e-05	0.984205
591	6	7.13114e-05	0.984276
592	10	0.000118852	0.984395
593	4	4.75409e-05	0.984442
594	10	0.000118852	0.984561
595	5	5.94262e-05	0.984621
596	5	5.94262e-05	0.98468
597	8	9.50819e-05	0.984775
598	12	0.000142623	0.984918
599	3	3.56557e-05	0.984953
600	6	7.13114e-05	0.985025
601	2	2.37705e-05	0.985048
602	8	9.50819e-05	0.985143
603	7	8.31967e-05	0.985227
604	6	7.13114e-05	0.985298
605	2	2.37705e-05	0.985322
606	5	5.94262e-05	0.985381
607	2	2.37705e-05	0.985405
608	9	0.000106967	0.985512
609	1	1.18852e-05	0.985524
610	5	5.94262e-05	0.985583
611	3	3.56557e-05	0.985619
612	6	7.13114e-05	0.98569
613	5	5.94262e-05	0.98575
614	5	5.94262e-05	0.985809
615	5	5.94262e-05	0.985868
616	12	0.000142623	0.986011
617	2	2.37705e-05	0.986035
618	5	5.94262e-05	0.986094
619	5	5.94262e-05	0.986154
620	1	1.18852e-05	0.986166
621	8	9.50819e-05	0.986261
622	4	4.75409e-05	0.986308
623	1	1.18852e-05	0.98632
624	3	3.56557e-05	0.986356
625	4	4.75409e-05	0.986403
626	5	5.94262e-05	0.986463
627	7	8.31967e-05	0.986546
628	7	8.31967e-05	0.986629
629	4	4.75409e-05	0.986677
630	9	0.000106967	0.986784
631	3	3.56557e-05	0.986819
632	2	2.37705e-05	0.986843
633	4	4.75409e-05	0.986891
634	7	8.31967e-05	0.986974
635	3	3.56557e-05	0.987009
636	6	7.13114e-05	0.987081
637	4	4.75409e-05	0.987128
638	5	5.94262e-05	0.987188
639	4	4.75409e-05	0.987235
640	3	3.56557e-05	0.987271
641	6	7.13114e-05	0.987342
642	4	4.75409e-05	0.98739
643	5	5.94262e-05	0.987449
644	3	3.56557e-05	0.987485
645	3	3.56557e-05	0.987521
646	5	5.94262e-05	0.98758
647	8	9.50819e-05	0.987675
648	9	0.000106967	0.987782
649	4	4.75409e-05	0.98783
650	2	2.37705e-05	0.987853
651	7	8.31967e-05	0.987936
652	4	4.75409e-05	0.987984
653	6	7.13114e-05	0.988055
654	4	4.75409e-05	0.988103
655	4	4.75409e-05	0.98815
656	5	5.94262e-05	0.98821
657	5	5.94262e-05	0.988269
658	3	3.56557e-05	0.988305
659	2	2.37705e-05	0.988329
660	4	4.75409e-05	0.988376
661	2	2.37705e-05	0.9884
662	4	4.75409e-05	0.988448
663	7	8.31967e-05	0.988531
664	6	7.13114e-05	0.988602
665	4	4.75409e-05	0.98865
666	3	3.56557e-05	0.988685
667	2	2.37705e-05	0.988709
668	2	2.37705e-05	0.988733
669	4	4.75409e-05	0.98878
670	4	4.75409e-05	0.988828
671	5	5.94262e-05	0.988887
672	5	5.94262e-05	0.988947
673	6	7.13114e-05	0.989018
674	5	5.94262e-05	0.989077
675	2	2.37705e-05	0.989101
677	2	2.37705e-05	0.989125
678	4	4.75409e-05	0.989173
679	4	4.75409e-05	0.98922
681	3	3.56557e-05	0.989256
682	3	3.56557e-05	0.989291
683	4	4.75409e-05	0.989339
684	4	4.75409e-05	0.989386
685	4	4.75409e-05	0.989434
686	2	2.37705e-05	0.989458
687	4	4.75409e-05	0.989505
688	5	5.94262e-05	0.989565
689	2	2.37705e-05	0.989589
690	8	9.50819e-05	0.989684
691	5	5.94262e-05	0.989743
692	5	5.94262e-05	0.989802
693	8	9.50819e-05	0.989898
694	4	4.75409e-05	0.989945
695	7	8.31967e-05	0.990028
696	1	1.18852e-05	0.99004
697	3	3.56557e-05	0.990076
698	2	2.37705e-05	0.9901
699	8	9.50819e-05	0.990195
701	4	4.75409e-05	0.990242
702	4	4.75409e-05	0.99029
703	2	2.37705e-05	0.990314
704	3	3.56557e-05	0.990349
705	4	4.75409e-05	0.990397
706	3	3.56557e-05	0.990432
708	6	7.13114e-05	0.990504
709	2	2.37705e-05	0.990527
710	6	7.13114e-05	0.990599
711	1	1.18852e-05	0.990611
712	7	8.31967e-05	0.990694
713	2	2.37705e-05	0.990718
714	3	3.56557e-05	0.990753
715	3	3.56557e-05	0.990789
716	3	3.56557e-05	0.990825
717	4	4.75409e-05	0.990872
718	2	2.37705e-05	0.990896
719	4	4.75409e-05	0.990943
720	4	4.75409e-05	0.990991
721	2	2.37705e-05	0.991015
722	3	3.56557e-05	0.99105
723	2	2.37705e-05	0.991074
724	4	4.75409e-05	0.991122
725	5	5.94262e-05	0.991181
726	2	2.37705e-05	0.991205
727	4	4.75409e-05	0.991252
728	7	8.31967e-05	0.991336
730	2	2.37705e-05	0.991359
731	2	2.37705e-05	0.991383
732	1	1.18852e-05	0.991395
733	5	5.94262e-05	0.991455
734	2	2.37705e-05	0.991478
735	4	4.75409e-05	0.991526
736	1	1.18852e-05	0.991538
737	1	1.18852e-05	0.99155
738	1	1.18852e-05	0.991561
739	3	3.56557e-05	0.991597
740	3	3.56557e-05	0.991633
741	3	3.56557e-05	0.991668
742	2	2.37705e-05	0.991692
744	5	5.94262e-05	0.991752
745	2	2.37705e-05	0.991775
746	3	3.56557e-05	0.991811
747	3	3.56557e-05	0.991847
748	3	3.56557e-05	0.991882
749	4	4.75409e-05	0.99193
750	3	3.56557e-05	0.991966
752	2	2.37705e-05	0.991989
753	2	2.37705e-05	0.992013
754	1	1.18852e-05	0.992025
755	2	2.37705e-05	0.992049
756	4	4.75409e-05	0.992096
757	1	1.18852e-05	0.992108
758	1	1.18852e-05	0.99212
759	2	2.37705e-05	0.992144
760	2	2.37705e-05	0.992168
761	5	5.94262e-05	0.992227
762	2	2.37705e-05	0.992251
763	1	1.18852e-05	0.992263
764	5	5.94262e-05	0.992322
765	4	4.75409e-05	0.99237
766	2	2.37705e-05	0.992393
769	2	2.37705e-05	0.992417
771	3	3.56557e-05	0.992453
772	3	3.56557e-05	0.992489
773	1	1.18852e-05	0.9925
774	3	3.56557e-05	0.992536
775	2	2.37705e-05	0.99256
776	4	4.75409e-05	0.992607
777	3	3.56557e-05	0.992643
778	1	1.18852e-05	0.992655
779	1	1.18852e-05	0.992667
780	2	2.37705e-05	0.992691
781	1	1.18852e-05	0.992702
782	1	1.18852e-05	0.992714
783	2	2.37705e-05	0.992738
784	1	1.18852e-05	0.99275
786	2	2.37705e-05	0.992774
787	2	2.37705e-05	0.992798
789	5	5.94262e-05	0.992857
790	2	2.37705e-05	0.992881
791	1	1.18852e-05	0.992893
792	5	5.94262e-05	0.992952
793	4	4.75409e-05	0.993
797	2	2.37705e-05	0.993023
798	2	2.37705e-05	0.993047
799	1	1.18852e-05	0.993059
800	1	1.18852e-05	0.993071
801	4	4.75409e-05	0.993118
802	1	1.18852e-05	0.99313
803	1	1.18852e-05	0.993142
804	4	4.75409e-05	0.99319
805	3	3.56557e-05	0.993225
806	1	1.18852e-05	0.993237
807	3	3.56557e-05	0.993273
808	1	1.18852e-05	0.993285
809	2	2.37705e-05	0.993309
810	2	2.37705e-05	0.993332
811	1	1.18852e-05	0.993344
812	2	2.37705e-05	0.993368
813	4	4.75409e-05	0.993416
814	3	3.56557e-05	0.993451
815	1	1.18852e-05	0.993463
816	1	1.18852e-05	0.993475
817	3	3.56557e-05	0.993511
819	2	2.37705e-05	0.993534
820	1	1.18852e-05	0.993546
822	2	2.37705e-05	0.99357
823	1	1.18852e-05	0.993582
824	2	2.37705e-05	0.993606
825	1	1.18852e-05	0.993618
826	1	1.18852e-05	0.99363
828	4	4.75409e-05	0.993677
829	1	1.18852e-05	0.993689
830	1	1.18852e-05	0.993701
832	1	1.18852e-05	0.993713
833	3	3.56557e-05	0.993748
834	2	2.37705e-05	0.993772
835	3	3.56557e-05	0.993808
837	3	3.56557e-05	0.993843
838	2	2.37705e-05	0.993867
839	2	2.37705e-05	0.993891
840	1	1.18852e-05	0.993903
841	3	3.56557e-05	0.993939
842	1	1.18852e-05	0.99395
843	5	5.94262e-05	0.99401
844	2	2.37705e-05	0.994034
845	1	1.18852e-05	0.994045
846	3	3.56557e-05	0.994081
847	2	2.37705e-05	0.994105
848	1	1.18852e-05	0.994117
849	1	1.18852e-05	0.994129
850	3	3.56557e-05	0.994164
851	1	1.18852e-05	0.994176
852	4	4.75409e-05	0.994224
853	2	2.37705e-05	0.994248
854	1	1.18852e-05	0.994259
855	2	2.37705e-05	0.994283
856	2	2.37705e-05	0.994307
859	1	1.18852e-05	0.994319
860	1	1.18852e-05	0.994331
861	1	1.18852e-05	0.994343
862	1	1.18852e-05	0.994355
865	3	3.56557e-05	0.99439
866	3	3.56557e-05	0.994426
867	2	2.37705e-05	0.99445
868	2	2.37705e-05	0.994473
869	1	1.18852e-05	0.994485
870	4	4.75409e-05	0.994533
871	4	4.75409e-05	0.99458
873	3	3.56557e-05	0.994616
874	1	1.18852e-05	0.994628
875	3	3.56557e-05	0.994664
876	2	2.37705e-05	0.994687
877	1	1.18852e-05	0.994699
878	2	2.37705e-05	0.994723
879	5	5.94262e-05	0.994782
883	2	2.37705e-05	0.994806
884	1	1.18852e-05	0.994818
885	2	2.37705e-05	0.994842
887	1	1.18852e-05	0.994854
888	1	1.18852e-05	0.994866
889	1	1.18852e-05	0.994877
890	2	2.37705e-05	0.994901
891	2	2.37705e-05	0.994925
893	3	3.56557e-05	0.994961
894	3	3.56557e-05	0.994996
895	1	1.18852e-05	0.995008
897	1	1.18852e-05	0.99502
898	2	2.37705e-05	0.995044
899	3	3.56557e-05	0.99508
900	1	1.18852e-05	0.995091
901	2	2.37705e-05	0.995115
902	1	1.18852e-05	0.995127
903	1	1.18852e-05	0.995139
904	1	1.18852e-05	0.995151
905	1	1.18852e-05	0.995163
907	1	1.18852e-05	0.995175
909	1	1.18852e-05	0.995186
910	1	1.18852e-05	0.995198
912	2	2.37705e-05	0.995222
913	1	1.18852e-05	0.995234
914	2	2.37705e-05	0.995258
916	1	1.18852e-05	0.99527
917	5	5.94262e-05	0.995329
918	2	2.37705e-05	0.995353
919	2	2.37705e-05	0.995377
920	1	1.18852e-05	0.995389
921	1	1.18852e-05	0.9954
924	1	1.18852e-05	0.995412
926	2	2.37705e-05	0.995436
927	3	3.56557e-05	0.995472
928	2	2.37705e-05	0.995495
929	2	2.37705e-05	0.995519
930	1	1.18852e-05	0.995531
931	3	3.56557e-05	0.995567
933	3	3.56557e-05	0.995602
934	2	2.37705e-05	0.995626
935	2	2.37705e-05	0.99565
937	1	1.18852e-05	0.995662
938	1	1.18852e-05	0.995674
939	1	1.18852e-05	0.995686
941	1	1.18852e-05	0.995698
942	1	1.18852e-05	0.995709
945	1	1.18852e-05	0.995721
946	1	1.18852e-05	0.995733
948	1	1.18852e-05	0.995745
949	1	1.18852e-05	0.995757
950	1	1.18852e-05	0.995769
952	1	1.18852e-05	0.995781
953	2	2.37705e-05	0.995805
954	1	1.18852e-05	0.995816
955	1	1.18852e-05	0.995828
957	1	1.18852e-05	0.99584
959	2	2.37705e-05	0.995864
961	2	2.37705e-05	0.995888
962	1	1.18852e-05	0.9959
963	1	1.18852e-05	0.995911
964	1	1.18852e-05	0.995923
965	1	1.18852e-05	0.995935
971	2	2.37705e-05	0.995959
972	1	1.18852e-05	0.995971
975	1	1.18852e-05	0.995983
976	2	2.37705e-05	0.996007
979	1	1.18852e-05	0.996018
980	1	1.18852e-05	0.99603
981	1	1.18852e-05	0.996042
982	1	1.18852e-05	0.996054
984	1	1.18852e-05	0.996066
985	1	1.18852e-05	0.996078
987	3	3.56557e-05	0.996114
988	1	1.18852e-05	0.996125
990	1	1.18852e-05	0.996137
993	2	2.37705e-05	0.996161
994	1	1.18852e-05	0.996173
995	1	1.18852e-05	0.996185
996	2	2.37705e-05	0.996209
997	1	1.18852e-05	0.99622
998	1	1.18852e-05	0.996232
1000	1	1.18852e-05	0.996244
1002	3	3.56557e-05	0.99628
1005	2	2.37705e-05	0.996304
1007	2	2.37705e-05	0.996327
1008	1	1.18852e-05	0.996339
1009	2	2.37705e-05	0.996363
1010	1	1.18852e-05	0.996375
1012	1	1.18852e-05	0.996387
1018	1	1.18852e-05	0.996399
1021	2	2.37705e-05	0.996423
1024	2	2.37705e-05	0.996446
1025	1	1.18852e-05	0.996458
1026	2	2.37705e-05	0.996482
1029	3	3.56557e-05	0.996518
1030	1	1.18852e-05	0.99653
1032	2	2.37705e-05	0.996553
1034	1	1.18852e-05	0.996565
1037	1	1.18852e-05	0.996577
1040	1	1.18852e-05	0.996589
1042	1	1.18852e-05	0.996601
1043	1	1.18852e-05	0.996613
1048	1	1.18852e-05	0.996625
1051	2	2.37705e-05	0.996648
1054	1	1.18852e-05	0.99666
1055	1	1.18852e-05	0.996672
1057	1	1.18852e-05	0.996684
1058	1	1.18852e-05	0.996696
1060	1	1.18852e-05	0.996708
1061	1	1.18852e-05	0.99672
1063	1	1.18852e-05	0.996732
1066	2	2.37705e-05	0.996755
1071	2	2.37705e-05	0.996779
1074	1	1.18852e-05	0.996791
1076	1	1.18852e-05	0.996803
1077	1	1.18852e-05	0.996815
1078	1	1.18852e-05	0.996827
1083	1	1.18852e-05	0.996839
1084	2	2.37705e-05	0.996862
1088	1	1.18852e-05	0.996874
1090	1	1.18852e-05	0.996886
1092	1	1.18852e-05	0.996898
1094	2	2.37705e-05	0.996922
1095	1	1.18852e-05	0.996934
1100	1	1.18852e-05	0.996945
1101	1	1.18852e-05	0.996957
1103	1	1.18852e-05	0.996969
1104	2	2.37705e-05	0.996993
1105	1	1.18852e-05	0.997005
1112	1	1.18852e-05	0.997017
1117	2	2.37705e-05	0.997041
1118	1	1.18852e-05	0.997052
1119	1	1.18852e-05	0.997064
1122	1	1.18852e-05	0.997076
1127	1	1.18852e-05	0.997088
1129	1	1.18852e-05	0.9971
1131	1	1.18852e-05	0.997112
1132	1	1.18852e-05	0.997124
1134	1	1.18852e-05	0.997136
1135	2	2.37705e-05	0.997159
1143	1	1.18852e-05	0.997171
1147	1	1.18852e-05	0.997183
1149	1	1.18852e-05	0.997195
1150	1	1.18852e-05	0.997207
1155	1	1.18852e-05	0.997219
1156	1	1.18852e-05	0.997231
1158	2	2.37705e-05	0.997255
1162	2	2.37705e-05	0.997278
1163	1	1.18852e-05	0.99729
1166	1	1.18852e-05	0.997302
1168	1	1.18852e-05	0.997314
1169	1	1.18852e-05	0.997326
1171	1	1.18852e-05	0.997338
1172	1	1.18852e-05	0.99735
1174	1	1.18852e-05	0.997361
1175	1	1.18852e-05	0.997373
1177	1	1.18852e-05	0.997385
1183	1	1.18852e-05	0.997397
1190	1	1.18852e-05	0.997409
1194	1	1.18852e-05	0.997421
1195	1	1.18852e-05	0.997433
1197	1	1.18852e-05	0.997445
1200	1	1.18852e-05	0.997457
1202	2	2.37705e-05	0.99748
1207	1	1.18852e-05	0.997492
1210	1	1.18852e-05	0.997504
1213	1	1.18852e-05	0.997516
1217	1	1.18852e-05	0.997528
1227	1	1.18852e-05	0.99754
1228	1	1.18852e-05	0.997552
1232	1	1.18852e-05	0.997564
1239	1	1.18852e-05	0.997575
1240	1	1.18852e-05	0.997587
1246	1	1.18852e-05	0.997599
1251	1	1.18852e-05	0.997611
1259	1	1.18852e-05	0.997623
1260	1	1.18852e-05	0.997635
1261	1	1.18852e-05	0.997647
1262	1	1.18852e-05	0.997659
1263	1	1.18852e-05	0.99767
1264	1	1.18852e-05	0.997682
1272	1	1.18852e-05	0.997694
1274	1	1.18852e-05	0.997706
1276	1	1.18852e-05	0.997718
1277	3	3.56557e-05	0.997754
1283	1	1.18852e-05	0.997766
1298	2	2.37705e-05	0.997789
1299	1	1.18852e-05	0.997801
1302	1	1.18852e-05	0.997813
1306	1	1.18852e-05	0.997825
1312	1	1.18852e-05	0.997837
1313	1	1.18852e-05	0.997849
1314	1	1.18852e-05	0.997861
1316	2	2.37705e-05	0.997884
1318	1	1.18852e-05	0.997896
1322	1	1.18852e-05	0.997908
1324	2	2.37705e-05	0.997932
1327	1	1.18852e-05	0.997944
1331	1	1.18852e-05	0.997956
1338	2	2.37705e-05	0.99798
1343	1	1.18852e-05	0.997991
1344	1	1.18852e-05	0.998003
1347	2	2.37705e-05	0.998027
1352	1	1.18852e-05	0.998039
1353	2	2.37705e-05	0.998063
1354	1	1.18852e-05	0.998075
1359	1	1.18852e-05	0.998086
1370	1	1.18852e-05	0.998098
1371	1	1.18852e-05	0.99811
1376	1	1.18852e-05	0.998122
1384	1	1.18852e-05	0.998134
1388	1	1.18852e-05	0.998146
1398	1	1.18852e-05	0.998158
1401	2	2.37705e-05	0.998182
1405	1	1.18852e-05	0.998193
1408	1	1.18852e-05	0.998205
1409	1	1.18852e-05	0.998217
1413	1	1.18852e-05	0.998229
1421	1	1.18852e-05	0.998241
1451	1	1.18852e-05	0.998253
1453	1	1.18852e-05	0.998265
1455	2	2.37705e-05	0.998289
1456	1	1.18852e-05	0.9983
1461	1	1.18852e-05	0.998312
1464	1	1.18852e-05	0.998324
1472	1	1.18852e-05	0.998336
1478	1	1.18852e-05	0.998348
1481	1	1.18852e-05	0.99836
1494	1	1.18852e-05	0.998372
1497	1	1.18852e-05	0.998384
1499	2	2.37705e-05	0.998407
1500	1	1.18852e-05	0.998419
1501	1	1.18852e-05	0.998431
1518	1	1.18852e-05	0.998443
1528	1	1.18852e-05	0.998455
1533	1	1.18852e-05	0.998467
1536	1	1.18852e-05	0.998479
1554	1	1.18852e-05	0.998491
1566	2	2.37705e-05	0.998514
1568	1	1.18852e-05	0.998526
1586	1	1.18852e-05	0.998538
1595	1	1.18852e-05	0.99855
1603	1	1.18852e-05	0.998562
1604	1	1.18852e-05	0.998574
1606	1	1.18852e-05	0.998586
1612	2	2.37705e-05	0.998609
1617	1	1.18852e-05	0.998621
1622	1	1.18852e-05	0.998633
1626	1	1.18852e-05	0.998645
1631	2	2.37705e-05	0.998669
1632	1	1.18852e-05	0.998681
1633	2	2.37705e-05	0.998705
1635	1	1.18852e-05	0.998716
1642	1	1.18852e-05	0.998728
1643	1	1.18852e-05	0.99874
1644	1	1.18852e-05	0.998752
1649	1	1.18852e-05	0.998764
1651	1	1.18852e-05	0.998776
1652	1	1.18852e-05	0.998788
1657	1	1.18852e-05	0.9988
1676	1	1.18852e-05	0.998811
1686	1	1.18852e-05	0.998823
1696	1	1.18852e-05	0.998835
1702	1	1.18852e-05	0.998847
1704	1	1.18852e-05	0.998859
1720	1	1.18852e-05	0.998871
1722	1	1.18852e-05	0.998883
1738	1	1.18852e-05	0.998895
1746	1	1.18852e-05	0.998907
1747	1	1.18852e-05	0.998918
1756	1	1.18852e-05	0.99893
1759	1	1.18852e-05	0.998942
1763	1	1.18852e-05	0.998954
1764	1	1.18852e-05	0.998966
1773	1	1.18852e-05	0.998978
1775	1	1.18852e-05	0.99899
1776	1	1.18852e-05	0.999002
1790	1	1.18852e-05	0.999014
1796	1	1.18852e-05	0.999025
1805	1	1.18852e-05	0.999037
1808	2	2.37705e-05	0.999061
1815	1	1.18852e-05	0.999073
1822	1	1.18852e-05	0.999085
1854	2	2.37705e-05	0.999109
1860	1	1.18852e-05	0.99912
1862	1	1.18852e-05	0.999132
1864	1	1.18852e-05	0.999144
1869	1	1.18852e-05	0.999156
1886	1	1.18852e-05	0.999168
1907	1	1.18852e-05	0.99918
1909	1	1.18852e-05	0.999192
1923	1	1.18852e-05	0.999204
1947	1	1.18852e-05	0.999216
1949	1	1.18852e-05	0.999227
1950	1	1.18852e-05	0.999239
1952	1	1.18852e-05	0.999251
1975	1	1.18852e-05	0.999263
2014	1	1.18852e-05	0.999275
2015	1	1.18852e-05	0.999287
2028	1	1.18852e-05	0.999299
2031	1	1.18852e-05	0.999311
2032	1	1.18852e-05	0.999323
2033	1	1.18852e-05	0.999334
2044	1	1.18852e-05	0.999346
2073	1	1.18852e-05	0.999358
2094	1	1.18852e-05	0.99937
2106	1	1.18852e-05	0.999382
2119	1	1.18852e-05	0.999394
2147	1	1.18852e-05	0.999406
2159	1	1.18852e-05	0.999418
2172	1	1.18852e-05	0.99943
2189	1	1.18852e-05	0.999441
2212	1	1.18852e-05	0.999453
2219	1	1.18852e-05	0.999465
2223	1	1.18852e-05	0.999477
2256	1	1.18852e-05	0.999489
2303	1	1.18852e-05	0.999501
2318	1	1.18852e-05	0.999513
2425	1	1.18852e-05	0.999525
2471	1	1.18852e-05	0.999536
2491	1	1.18852e-05	0.999548
2512	1	1.18852e-05	0.99956
2549	1	1.18852e-05	0.999572
2591	1	1.18852e-05	0.999584
2681	1	1.18852e-05	0.999596
2688	1	1.18852e-05	0.999608
2790	1	1.18852e-05	0.99962
2799	1	1.18852e-05	0.999632
2803	1	1.18852e-05	0.999643
2837	1	1.18852e-05	0.999655
2839	1	1.18852e-05	0.999667
2855	1	1.18852e-05	0.999679
2874	1	1.18852e-05	0.999691
2988	1	1.18852e-05	0.999703
2996	1	1.18852e-05	0.999715
3035	1	1.18852e-05	0.999727
3080	1	1.18852e-05	0.999739
3132	1	1.18852e-05	0.99975
3141	1	1.18852e-05	0.999762
3222	1	1.18852e-05	0.999774
3340	1	1.18852e-05	0.999786
3341	1	1.18852e-05	0.999798
3405	1	1.18852e-05	0.99981
3662	1	1.18852e-05	0.999822
3871	1	1.18852e-05	0.999834
3894	1	1.18852e-05	0.999845
3989	1	1.18852e-05	0.999857
4007	1	1.18852e-05	0.999869
4030	1	1.18852e-05	0.999881
4112	1	1.18852e-05	0.999893
4338	1	1.18852e-05	0.999905
4358	1	1.18852e-05	0.999917
4945	1	1.18852e-05	0.999929
5064	1	1.18852e-05	0.999941
5407	1	1.18852e-05	0.999952
6025	1	1.18852e-05	0.999964
6645	1	1.18852e-05	0.999976
7549	1	1.18852e-05	0.999988
11306	1	1.18852e-05	1
