# Supplementary material for: Pooled genome-wide CRISPR activation screening for rapamycin resistance genes in Drosophila cells
Source: eLife journal article supplement (doi:10.7554/elife.85542), 2023-04-10
Supplement: fig2-figsupp3-data1 [file Figure 2-figure supplement3 Source Data.xlsx]

## Sheet: S3A rep1
id	num	neg|score	neg|p-value	neg|fdr	neg|rank	neg|goodsgrna	neg|lfc	pos|score	pos|p-value	pos|fdr	pos|rank	pos|goodsgrna	pos|lfc
FBgn0259789	5	2.2608e-08	3.1679e-07	0.00165	1	3	-1.4635	0.21868	0.37982	0.995008	5951	2	-1.4635
FBgn0026439	6	8.9504e-08	3.1679e-07	0.00165	2	4	-0.53069	0.43834	0.60048	0.996647	9044	2	-0.53069
FBgn0265798	4	1.6168e-07	3.1679e-07	0.00165	3	4	-2.6917	1	1	0.999999	15627	0	-2.6917
FBgn0015754	8	6.1764e-07	4.7519e-06	0.012376	4	5	-1.0474	0.54969	0.73039	0.99876	10382	2	-1.0474
FBgn0041094	6	7.9182e-07	3.4847e-06	0.012376	5	5	-0.98485	0.39854	0.56931	0.996647	8609	1	-0.98485
FBgn0003886	6	1.0719e-06	4.7519e-06	0.012376	6	2	-0.55813	0.62	0.74489	0.999611	11173	1	-0.55813
FBgn0003129	6	1.601e-06	9.1869e-06	0.019183	7	2	-0.07464	0.80576	0.82725	0.999611	12798	1	-0.07464
FBgn0000157	6	2.1004e-06	9.8205e-06	0.019183	8	3	-0.42999	0.9695	0.96961	0.999611	15141	0	-0.42999
FBgn0025687	6	3.2976e-06	1.7107e-05	0.029703	9	6	-1.1348	0.99967	0.99969	0.999981	15622	0	-1.1348
FBgn0028993	6	5.2323e-06	2.7561e-05	0.043069	10	6	-1.0548	0.99999	1	0.999999	15626	0	-1.0548
FBgn0263118	6	1.9875e-05	9.282e-05	0.131863	11	3	-0.19892	0.58178	0.71762	0.996911	10776	2	-0.19892
FBgn0037936	5	2.2537e-05	0.00010486	0.136551	12	2	0.064558	0.077358	0.17848	0.995008	2895	2	0.064558
FBgn0033051	6	2.6403e-05	0.0001302	0.156512	13	5	-1.0417	0.95358	0.95352	0.999611	14880	0	-1.0417
FBgn0085376	6	3.5655e-05	0.00018596	0.207567	14	1	0.17365	0.38806	0.56119	0.996647	8490	2	0.17365
FBgn0029896	9	3.7489e-05	0.00028289	0.257151	15	5	-0.55247	0.34393	0.58651	0.996647	7952	3	-0.55247
FBgn0038098	6	5.2889e-05	0.00028226	0.257151	16	5	-0.80793	0.52643	0.67106	0.996647	10103	1	-0.80793
FBgn0013765	6	5.4983e-05	0.00029303	0.257151	17	3	0.15009	0.01064	0.040811	0.98853	589	3	0.15009
FBgn0027795	6	5.5813e-05	0.0002962	0.257151	18	6	-0.71073	0.99977	0.99979	0.999981	15624	0	-0.71073
FBgn0028491	6	6.4475e-05	0.00034055	0.280094	19	4	-0.9136	0.74967	0.79719	0.999611	12228	1	-0.9136
FBgn0085279	6	9.2897e-05	0.00050021	0.37223	20	5	-0.86735	0.97766	0.97775	0.999611	15256	0	-0.86735
FBgn0003257	6	0.00010696	0.00057498	0.408416	21	2	-0.21441	0.54257	0.68455	0.996647	10296	2	-0.21441
FBgn0267079	4	0.00010746	0.00038997	0.304703	22	4	-0.5863	0.99989	0.99989	0.999999	15625	0	-0.5863
FBgn0002931	6	0.00011199	0.00060666	0.412183	23	4	-1.1039	0.78504	0.81531	0.999611	12574	1	-1.1039
FBgn0034059	6	0.00016061	0.00088987	0.519069	24	5	-0.51792	0.52584	0.67056	0.996647	10094	1	-0.51792
FBgn0062412	6	0.00016236	0.0008962	0.519069	25	4	-1.6421	0.98054	0.98057	0.999611	15311	0	-1.6421
FBgn0035246	6	0.0001629	0.00089684	0.519069	26	2	0.0050431	0.044197	0.12574	0.995008	1848	1	0.0050431
FBgn0035258	6	0.0001709	0.00094562	0.527758	27	5	-0.52358	0.52072	0.66637	0.996647	10024	1	-0.52358
FBgn0265075	4	0.00021021	0.00077329	0.503507	28	2	-0.747	0.89067	0.89016	0.999611	13891	0	-0.747
FBgn0263246	6	0.00023249	0.0012751	0.575462	29	5	-0.94228	0.91326	0.91297	0.999611	14234	0	-0.94228
FBgn0032031	6	0.00023779	0.0013144	0.575462	30	5	-0.61437	0.6321	0.74912	0.999611	11259	1	-0.61437
FBgn0032433	6	0.00024302	0.0013334	0.575462	31	4	-0.58127	0.87205	0.87397	0.999611	13617	1	-0.58127
FBgn0030204	6	0.00024663	0.0013543	0.575462	32	5	-0.61628	0.91588	0.91557	0.999611	14265	0	-0.61628
FBgn0051549	6	0.00024874	0.0013625	0.575462	33	5	-0.79819	0.93449	0.93434	0.999611	14575	0	-0.79819
FBgn0050456	8	0.0002712	0.0016977	0.613419	34	3	0.024584	0.051436	0.15859	0.995008	2077	3	0.024584
FBgn0050009	4	0.00027633	0.00099441	0.535848	35	4	-0.51432	0.99972	0.99973	0.999981	15623	0	-0.51432
FBgn0011272	5	0.00029656	0.0013625	0.575462	36	4	-0.65089	0.45164	0.59715	0.996647	9219	1	-0.65089
FBgn0266414	4	0.00029823	0.0010704	0.557591	37	3	-2.0204	0.62003	0.64968	0.996647	11175	1	-2.0204
FBgn0053772	6	0.00032628	0.0017864	0.613419	38	4	-0.73315	0.88352	0.88393	0.999611	13789	1	-0.73315
FBgn0036775	6	0.00032944	0.0018029	0.613419	39	5	-0.90508	0.97013	0.97025	0.999611	15158	0	-0.90508
FBgn0265835	6	0.00033112	0.0018149	0.613419	40	5	-0.63109	0.11954	0.26386	0.995008	3868	1	-0.63109
FBgn0036411	6	0.00034765	0.0018941	0.613419	41	4	-1.0598	0.096692	0.23088	0.995008	3412	2	-1.0598
FBgn0026314	6	0.00034832	0.0018966	0.613419	42	4	-0.89362	0.50671	0.65498	0.996647	9859	2	-0.89362
FBgn0037935	6	0.00035243	0.0019213	0.613419	43	4	-0.74383	0.076469	0.19759	0.995008	2861	2	-0.74383
FBgn0259209	8	0.00035709	0.0021748	0.613419	44	4	-0.75607	0.92109	0.92688	0.999611	14343	1	-0.75607
FBgn0041229	6	0.000368	0.0020081	0.613419	45	5	-1.0418	0.23774	0.42461	0.996647	6316	1	-1.0418
FBgn0032163	4	0.0003736	0.0013391	0.575462	46	4	-0.66347	0.99963	0.99964	0.999981	15621	0	-0.66347
FBgn0037217	6	0.00039215	0.0021393	0.613419	47	2	-0.052556	0.29218	0.4889	0.996647	7249	2	-0.052556
FBgn0264344	6	0.00039635	0.0021583	0.613419	48	3	-0.23959	0.10071	0.23668	0.995008	3482	1	-0.23959
FBgn0032291	6	0.00040443	0.0021982	0.613419	49	6	-0.79188	0.9996	0.99961	0.999981	15620	0	-0.79188
FBgn0266094	4	0.00043678	0.0015551	0.613419	50	3	-0.74329	0.98194	0.98193	0.999611	15339	0	-0.74329
FBgn0036575	6	0.00043693	0.0023648	0.615924	51	4	-0.68943	0.98754	0.98754	0.999763	15433	0	-0.68943
FBgn0267236	6	0.0004371	0.0023648	0.615924	52	3	-1.0957	0.47965	0.63309	0.996647	9530	2	-1.0957
FBgn0028371	8	0.00043806	0.0026252	0.618094	53	6	-0.71054	0.30175	0.52305	0.996647	7376	1	-0.71054
FBgn0259682	6	0.00047333	0.002541	0.618094	54	5	-0.61632	0.05537	0.15121	0.995008	2213	1	-0.61632
FBgn0261613	6	0.00047388	0.0025416	0.618094	55	4	-0.37603	0.96463	0.96468	0.999611	15066	0	-0.37603
FBgn0000412	7	0.00047535	0.0026474	0.618094	56	3	-0.82417	0.073257	0.19437	0.995008	2759	1	-0.82417
FBgn0260965	6	0.0004968	0.0026512	0.618094	57	4	-0.41115	0.79579	0.82141	0.999611	12685	1	-0.41115
FBgn0027348	6	0.00050815	0.0027032	0.618094	58	3	-0.56644	0.81953	0.83573	0.999611	12957	1	-0.56644
FBgn0028519	6	0.00051436	0.0027292	0.618094	59	3	-0.61235	0.14932	0.30543	0.995008	4523	1	-0.61235
FBgn0001142	6	0.00053472	0.0028413	0.6343	60	4	-1.1293	0.98673	0.98677	0.999763	15421	0	-1.1293
FBgn0011837	3	0.00055256	0.0016198	0.613419	61	2	-0.32897	0.44902	0.48799	0.996647	9179	1	-0.32897
FBgn0266388	4	0.00055574	0.0019993	0.613419	62	3	-0.90318	0.92558	0.9252	0.999611	14430	0	-0.90318
FBgn0038706	6	0.00057004	0.003032	0.667341	63	3	-0.33025	0.4678	0.62366	0.996647	9393	2	-0.33025
FBgn0265339	4	0.00057004	0.0020493	0.613419	64	2	-0.33286	0.59697	0.63465	0.996647	10974	1	-0.33286
FBgn0031254	4	0.0006026	0.0021608	0.613419	65	3	-0.91376	0.95772	0.95755	0.999611	14947	0	-0.91376
FBgn0039452	6	0.00060599	0.0032183	0.684306	66	2	-0.053315	0.13216	0.2816	0.995008	4153	2	-0.053315
FBgn0261618	9	0.00063717	0.0039501	0.730313	67	6	-0.79333	0.98474	0.98466	0.999611	15390	0	-0.79333
FBgn0267827	4	0.00064165	0.002299	0.615924	68	3	-0.92217	0.70015	0.70794	0.99676	11787	1	-0.92217
FBgn0267688	4	0.00064643	0.0023154	0.615924	69	4	-0.62998	0.99935	0.99936	0.999874	15619	0	-0.62998
FBgn0264695	8	0.000652	0.0038322	0.730313	70	6	-0.71065	0.72735	0.83709	0.999611	12011	2	-0.71065
FBgn0039467	6	0.00066327	0.0035097	0.722074	71	6	-0.74611	0.99934	0.99935	0.999874	15618	0	-0.74611
FBgn0022772	6	0.0006731	0.0035585	0.722074	72	6	-0.54942	0.99933	0.99934	0.999874	15617	0	-0.54942
FBgn0038595	6	0.00068197	0.0036041	0.722074	73	5	-1.3908	0.97305	0.9731	0.999611	15199	0	-1.3908
FBgn0267983	4	0.00068213	0.0024459	0.618094	74	4	-0.7525	0.99932	0.99931	0.999874	15616	0	-0.7525
FBgn0267730	4	0.00068726	0.0024637	0.618094	75	2	-0.30639	0.34393	0.48296	0.996647	7953	2	-0.30639
FBgn0034330	6	0.00069406	0.0036567	0.723336	76	4	-0.99491	0.23825	0.42527	0.996647	6322	1	-0.99491
FBgn0030420	3	0.0007061	0.0020493	0.613419	77	3	-1.5024	0.99506	0.99516	0.999874	15540	0	-1.5024
FBgn0035137	5	0.00070876	0.0032145	0.684306	78	4	-0.88852	0.98275	0.98283	0.999611	15359	0	-0.88852
FBgn0051288	6	0.00072147	0.0037929	0.730313	79	3	-0.57429	0.84857	0.85555	0.999611	13328	1	-0.57429
FBgn0040318	6	0.00074854	0.0039247	0.730313	80	4	-0.58034	0.96282	0.96288	0.999611	15030	0	-0.58034
FBgn0036654	6	0.00075946	0.0039754	0.730313	81	5	-0.52439	0.90231	0.90208	0.999611	14065	0	-0.52439
FBgn0039523	6	0.00076865	0.0040191	0.730313	82	4	-0.65242	0.8142	0.8324	0.999611	12888	1	-0.65242
FBgn0031315	6	0.00077768	0.0040717	0.731365	83	4	-0.63134	0.96861	0.96872	0.999611	15126	0	-0.63134
FBgn0266163	6	0.00081014	0.004239	0.747414	84	3	-0.42316	0.93164	0.93148	0.999611	14531	0	-0.42316
FBgn0037356	6	0.00083212	0.0043378	0.75319	85	3	-1.0343	0.9813	0.98132	0.999611	15326	0	-1.0343
FBgn0036496	6	0.00084864	0.0043993	0.75519	86	5	-0.84695	0.9991	0.99911	0.999874	15613	0	-0.84695
FBgn0038504	6	0.0008722	0.0044943	0.75519	87	4	-0.61832	0.7749	0.80987	0.999611	12471	1	-0.61832
FBgn0010909	6	0.00088363	0.0045523	0.756794	88	3	-0.18487	0.89443	0.89425	0.999611	13947	1	-0.18487
FBgn0034246	6	0.00090176	0.0046223	0.757168	89	5	-0.94936	0.5444	0.68615	0.996647	10312	1	-0.94936
FBgn0267553	4	0.00090417	0.0032405	0.684306	90	4	-0.80189	0.9991	0.99908	0.999874	15609	0	-0.80189
FBgn0050413	6	0.00091033	0.0046514	0.757168	91	3	-0.36331	0.085562	0.21453	0.995008	3110	1	-0.36331
FBgn0034622	6	0.00097132	0.0048998	0.776419	92	4	-0.40684	0.97678	0.97685	0.999611	15248	0	-0.40684
FBgn0261953	9	0.00098901	0.0057932	0.815761	93	3	-0.18029	0.63372	0.79935	0.999611	11268	2	-0.18029
FBgn0031708	4	0.00099147	0.0035344	0.722074	94	2	-0.82952	0.91946	0.91913	0.999611	14319	0	-0.82952
FBgn0028490	6	0.0010183	0.0051019	0.776419	95	4	-0.77261	0.98116	0.98119	0.999611	15323	0	-0.77261
FBgn0031548	6	0.0010323	0.005164	0.776419	96	5	-0.26616	0.91674	0.91639	0.999611	14277	0	-0.26616
FBgn0000500	6	0.0010326	0.0051646	0.776419	97	4	-0.706	0.9797	0.97971	0.999611	15297	0	-0.706
FBgn0036150	6	0.0010336	0.0051672	0.776419	98	4	-0.39982	0.58016	0.71625	0.996911	10755	1	-0.39982
FBgn0262737	7	0.0010514	0.0054618	0.790292	99	2	-0.15843	0.53598	0.69518	0.996647	10213	1	-0.15843
FBgn0050067	6	0.0010622	0.0052673	0.782318	100	3	-0.84508	0.26417	0.45884	0.996647	6804	1	-0.84508
FBgn0028942	6	0.0010987	0.0054143	0.790292	101	5	-0.46548	0.22318	0.40536	0.995008	6037	1	-0.46548
FBgn0000212	4	0.0011114	0.0039875	0.730313	102	4	-0.80254	0.99889	0.99886	0.999874	15606	0	-0.80254
FBgn0028422	6	0.0011715	0.0057032	0.815761	103	3	-0.077176	0.48667	0.6388	0.996647	9609	2	-0.077176
FBgn0051840	4	0.0011842	0.0042567	0.747414	104	3	-0.80286	0.87799	0.87759	0.999611	13722	0	-0.80286
FBgn0085316	6	0.0011938	0.0057944	0.815761	105	3	-0.94369	0.17312	0.33829	0.995008	5012	1	-0.94369
FBgn0038583	4	0.0012362	0.0044493	0.75519	106	4	-0.55399	0.99876	0.99873	0.999874	15604	0	-0.55399
FBgn0037371	6	0.0012473	0.006013	0.838976	107	2	0.059356	0.70264	0.77606	0.999611	11803	1	0.059356
FBgn0265368	4	0.0013428	0.0048257	0.776419	108	3	-0.87155	0.99067	0.99071	0.999763	15474	0	-0.87155
FBgn0037008	4	0.0013817	0.0049568	0.776419	109	3	-0.82167	0.83248	0.83195	0.999611	13127	0	-0.82167
FBgn0036990	6	0.0013898	0.0065763	0.879369	110	2	-0.53405	0.5806	0.71664	0.996911	10759	2	-0.53405
FBgn0011281	6	0.0014049	0.0066498	0.880643	111	4	-0.68015	0.16625	0.3288	0.995008	4890	1	-0.68015
FBgn0030200	4	0.0014105	0.0050512	0.776419	112	4	-0.52071	0.99859	0.99857	0.999874	15597	0	-0.52071
FBgn0017457	1	0.0014203	0.0014018	0.576472	113	1	-1.7142	0.99858	0.99865	0.999874	15596	0	-1.7142
FBgn0030053	5	0.0014497	0.0064223	0.879369	114	2	0.053895	0.74577	0.76603	0.999611	12189	1	0.053895
FBgn0037295	6	0.0014497	0.0068335	0.895512	115	4	-0.51924	0.98876	0.98879	0.999763	15447	0	-0.51924
FBgn0033252	6	0.0014832	0.0069742	0.895512	116	3	-0.67862	0.98995	0.98997	0.999763	15461	0	-0.67862
FBgn0029727	6	0.0015266	0.0071509	0.903585	117	2	-0.11209	0.18812	0.35865	0.995008	5315	2	-0.11209
FBgn0037614	6	0.0015322	0.0071699	0.903585	118	1	-0.053196	0.2004	0.37526	0.995008	5572	2	-0.053196
FBgn0032658	5	0.0016642	0.0073264	0.904459	119	5	-0.46713	0.99834	0.99834	0.999874	15592	0	-0.46713
FBgn0024249	6	0.0016746	0.0077205	0.932178	120	2	-0.21147	0.63766	0.75111	0.999611	11299	1	-0.21147
FBgn0053463	6	0.0016789	0.0077338	0.932178	121	3	-0.19457	0.52494	0.6698	0.996647	10084	2	-0.19457
FBgn0033985	6	0.001684	0.0077547	0.932178	122	5	-0.73207	0.9991	0.99911	0.999874	15615	0	-0.73207
FBgn0039075	6	0.0017436	0.0079689	0.936984	123	3	-0.22439	0.17834	0.34543	0.995008	5125	3	-0.22439
FBgn0015544	6	0.0017459	0.0079746	0.936984	124	1	0.1865	0.15985	0.3201	0.995008	4758	3	0.1865
FBgn0031768	6	0.0018171	0.0082603	0.956179	125	3	-0.38502	0.18777	0.35821	0.995008	5313	1	-0.38502
FBgn0265694	4	0.0018264	0.0065357	0.879369	126	3	-0.6242	0.70591	0.71251	0.996911	11829	1	-0.6242
FBgn0034510	5	0.0018647	0.0082008	0.956179	127	5	-0.73619	0.99814	0.99813	0.999874	15589	0	-0.73619
FBgn0036660	3	0.0018708	0.0053066	0.782318	128	1	0.12828	0.11576	0.19681	0.995008	3788	1	0.12828
FBgn0038799	6	0.0018883	0.0085442	0.960574	129	1	0.062739	0.47924	0.63277	0.996647	9527	2	0.062739
FBgn0034614	4	0.0019375	0.0069279	0.895512	130	3	-0.70461	0.88422	0.88378	0.999611	13799	0	-0.70461
FBgn0053158	5	0.0019405	0.0085112	0.960574	131	5	-1.0028	0.99806	0.99807	0.999874	15587	0	-1.0028
FBgn0013576	24	0.0019407	0.015465	0.989383	132	11	-0.27511	0.69181	0.9203	0.999611	11726	5	-0.27511
FBgn0026386	6	0.0019515	0.0088134	0.976792	133	3	-0.10822	0.26565	0.46079	0.996647	6828	3	-0.10822
FBgn0267529	4	0.0019555	0.0069913	0.895512	134	3	-0.74907	0.93118	0.93079	0.999611	14525	0	-0.74907
FBgn0030500	6	0.0020307	0.0091416	0.982402	135	2	-0.21735	0.23774	0.42461	0.996647	6314	1	-0.21735
FBgn0036716	6	0.0020398	0.0091784	0.982402	136	5	-0.36352	0.6321	0.74912	0.999611	11260	1	-0.36352
FBgn0267631	4	0.0020402	0.0072916	0.904459	137	3	-0.48951	0.92866	0.9283	0.999611	14485	0	-0.48951
FBgn0010497	5	0.0020485	0.0089636	0.982402	138	3	-0.93677	0.83795	0.83864	0.999611	13197	1	-0.93677
FBgn0034572	5	0.0020986	0.0091676	0.982402	139	4	-1.4731	0.89226	0.89259	0.999611	13919	0	-1.4731
FBgn0030720	6	0.0021075	0.0094274	0.989383	140	4	-0.801	0.59723	0.731	0.998969	10977	1	-0.801
FBgn0010388	4	0.0021949	0.007839	0.935115	141	4	-0.90114	0.99781	0.99781	0.999874	15584	0	-0.90114
FBgn0265042	14	0.0022301	0.014549	0.989383	142	9	-0.56074	0.55256	0.80016	0.999611	10426	1	-0.56074
FBgn0283479	6	0.00227	0.010088	0.989383	143	4	-0.5722	0.58441	0.71994	0.996911	10807	2	-0.5722
FBgn0003382	7	0.0022912	0.011259	0.989383	144	4	-0.63588	0.61306	0.74911	0.999611	11126	2	-0.63588
FBgn0264077	6	0.0022967	0.010184	0.989383	145	5	-0.46246	0.99387	0.99387	0.999874	15521	0	-0.46246
FBgn0264865	4	0.0023428	0.0083731	0.958264	146	3	-0.39477	0.96854	0.96831	0.999611	15122	0	-0.39477
FBgn0267581	4	0.0023512	0.008401	0.958264	147	2	-0.52575	0.81673	0.81622	0.999611	12920	0	-0.52575
FBgn0034997	6	0.0023866	0.010535	0.989383	148	2	0.16987	0.25245	0.44385	0.996647	6585	3	0.16987
FBgn0036590	6	0.0024087	0.010624	0.989383	149	4	-0.63449	0.81357	0.832	0.999611	12879	1	-0.63449
FBgn0040092	6	0.0024278	0.0107	0.989383	150	5	-0.44569	0.99348	0.99349	0.999874	15516	0	-0.44569
FBgn0264467	4	0.0024461	0.0087387	0.975424	151	4	-0.65817	0.99345	0.99348	0.999874	15515	0	-0.65817
FBgn0026874	6	0.002453	0.01081	0.989383	152	3	-0.35854	0.38701	0.56035	0.996647	8477	1	-0.35854
FBgn0085293	6	0.0024906	0.010963	0.989383	153	3	-0.96996	0.2947	0.49074	0.996647	7279	2	-0.96996
FBgn0267408	6	0.0024906	0.010963	0.989383	154	4	-0.79167	0.99685	0.99682	0.999874	15569	0	-0.79167
FBgn0031252	6	0.0025336	0.011136	0.989383	155	3	-0.254	0.40548	0.5747	0.996647	8697	2	-0.254
FBgn0031144	6	0.0026	0.011415	0.989383	156	3	-0.125	0.52828	0.67263	0.996647	10122	2	-0.125
FBgn0031000	6	0.0026062	0.011442	0.989383	157	5	-1.1048	0.99731	0.99727	0.999874	15575	0	-1.1048
FBgn0003651	3	0.0026184	0.0073505	0.904459	158	1	-0.9996	0.609	0.6135	0.996647	11095	1	-0.9996
FBgn0050391	6	0.0026401	0.011571	0.989383	159	5	-0.46378	0.94101	0.94091	0.999611	14672	0	-0.46378
FBgn0002855	6	0.0026421	0.01158	0.989383	160	5	-0.46167	0.9988	0.99876	0.999874	15605	0	-0.46167
FBgn0037000	6	0.0026712	0.011696	0.989383	161	3	-0.2357	0.82325	0.83813	0.999611	13003	1	-0.2357
FBgn0036806	6	0.0026842	0.011751	0.989383	162	5	-0.33956	0.71026	0.77922	0.999611	11874	1	-0.33956
FBgn0036147	6	0.0026898	0.011768	0.989383	163	3	-0.4579	0.24249	0.43082	0.996647	6400	2	-0.4579
FBgn0051954	5	0.0027034	0.011735	0.989383	164	4	-0.65277	0.30834	0.46234	0.996647	7470	1	-0.65277
FBgn0259878	6	0.0027075	0.01184	0.989383	165	4	-0.66916	0.82951	0.84229	0.999611	13085	1	-0.66916
FBgn0033788	6	0.0027085	0.011846	0.989383	166	5	-0.56613	0.99824	0.99818	0.999874	15590	0	-0.56613
FBgn0025549	6	0.0027424	0.011991	0.989383	167	3	-0.26788	0.94778	0.9476	0.999611	14788	0	-0.26788
FBgn0004860	6	0.0027456	0.012001	0.989383	168	3	-0.039645	0.91845	0.91812	0.999611	14301	0	-0.039645
FBgn0261648	5	0.0027603	0.011922	0.989383	169	1	-0.11913	0.74987	0.76875	0.999611	12231	1	-0.11913
FBgn0031655	4	0.0027939	0.0098943	0.989383	170	4	-1.0123	0.99721	0.99721	0.999874	15573	0	-1.0123
FBgn0267256	4	0.0027994	0.0099159	0.989383	171	3	-0.62871	0.95772	0.95755	0.999611	14944	0	-0.62871
FBgn0005536	6	0.0028037	0.012229	0.989383	172	5	-0.76321	0.79929	0.8235	0.999611	12725	1	-0.76321
FBgn0024288	6	0.0028491	0.012383	0.989383	173	4	-0.68643	0.18064	0.34856	0.995008	5164	2	-0.68643
FBgn0033627	6	0.0028491	0.012383	0.989383	174	2	-0.15886	0.039276	0.11421	0.995008	1692	3	-0.15886
FBgn0001180	6	0.00286	0.012426	0.989383	175	5	-0.40242	0.97129	0.97142	0.999611	15173	0	-0.40242
FBgn0005624	6	0.002863	0.012434	0.989383	176	3	-0.8724	0.39136	0.56379	0.996647	8531	2	-0.8724
FBgn0267283	4	0.0029086	0.010314	0.989383	177	4	-0.83507	0.99709	0.99708	0.999874	15572	0	-0.83507
FBgn0038115	6	0.0029199	0.012652	0.989383	178	5	-0.60058	0.88999	0.88996	0.999611	13878	1	-0.60058
FBgn0033122	6	0.0029207	0.012657	0.989383	179	3	-0.27089	0.50363	0.65248	0.996647	9816	1	-0.27089
FBgn0037720	6	0.002938	0.012723	0.989383	180	3	-0.18235	0.053793	0.14765	0.995008	2164	3	-0.18235
FBgn0032184	6	0.0029558	0.012791	0.989383	181	1	-0.056587	0.92247	0.92221	0.999611	14377	0	-0.056587
FBgn0046113	6	0.0030115	0.01302	0.989383	182	4	-0.65965	0.98629	0.98631	0.999763	15415	0	-0.65965
FBgn0037191	6	0.0030119	0.013024	0.989383	183	3	-0.42571	0.003347	0.014404	0.980433	199	1	-0.42571
FBgn0031791	6	0.0030269	0.013078	0.989383	184	3	-0.10191	0.10482	0.24265	0.995008	3571	2	-0.10191
FBgn0043534	6	0.0030449	0.013147	0.989383	185	3	-0.41473	0.42598	0.59068	0.996647	8913	2	-0.41473
FBgn0265899	4	0.0030598	0.010823	0.989383	186	2	-1.013	0.62823	0.65519	0.996647	11231	1	-1.013
FBgn0028703	6	0.0030636	0.013222	0.989383	187	4	-0.50228	0.13039	0.27917	0.995008	4117	1	-0.50228
FBgn0035207	5	0.0030639	0.012862	0.989383	188	3	-0.46142	0.71227	0.74499	0.999611	11890	1	-0.46142
FBgn0052986	5	0.0030933	0.012967	0.989383	189	3	-0.62233	0.97338	0.97345	0.999611	15205	0	-0.62233
FBgn0053194	6	0.0030936	0.013349	0.989383	190	4	-0.53854	0.31512	0.50579	0.996647	7568	1	-0.53854
FBgn0050047	6	0.003098	0.013363	0.989383	191	3	-0.12927	0.28461	0.48337	0.996647	7150	2	-0.12927
FBgn0264358	4	0.0031116	0.010996	0.989383	192	3	-0.60108	0.98694	0.98695	0.999763	15425	0	-0.60108
FBgn0033751	6	0.0031157	0.013425	0.989383	193	5	-0.83834	0.99829	0.99823	0.999874	15591	0	-0.83834
FBgn0052107	6	0.0031157	0.013425	0.989383	194	5	-0.62867	0.99866	0.99861	0.999874	15602	0	-0.62867
FBgn0033787	4	0.0031168	0.011021	0.989383	195	3	-0.66567	0.9825	0.98249	0.999611	15350	0	-0.66567
FBgn0043364	5	0.0031176	0.013041	0.989383	196	3	-0.99594	0.82458	0.82629	0.999611	13031	1	-0.99594
FBgn0259716	6	0.0031271	0.013472	0.989383	197	3	-0.47784	0.90566	0.90538	0.999611	14129	0	-0.47784
FBgn0036663	9	0.0031511	0.016496	0.989383	198	5	-0.18511	0.89288	0.92481	0.999611	13925	1	-0.18511
FBgn0265526	4	0.0031599	0.011166	0.989383	199	4	-0.5212	0.99684	0.99683	0.999874	15568	0	-0.5212
FBgn0039637	3	0.0032224	0.0090029	0.982402	200	3	-1.6069	0.99678	0.99682	0.999874	15566	0	-1.6069
FBgn0037206	5	0.0032271	0.013384	0.989383	201	3	-0.29075	0.86205	0.86236	0.999611	13489	0	-0.29075
FBgn0267918	4	0.0032289	0.011413	0.989383	202	3	-0.87924	0.974	0.9738	0.999611	15210	0	-0.87924
FBgn0040354	5	0.0032308	0.013397	0.989383	203	4	-0.54592	0.86236	0.86267	0.999611	13498	0	-0.54592
FBgn0040236	6	0.0032315	0.013876	0.989383	204	4	-0.71143	0.71879	0.78296	0.999611	11943	1	-0.71143
FBgn0260860	6	0.0032992	0.014145	0.989383	205	3	-0.13623	0.12938	0.27777	0.995008	4091	3	-0.13623
FBgn0014006	6	0.0033243	0.014253	0.989383	206	4	-0.68203	0.8733	0.87502	0.999611	13632	1	-0.68203
FBgn0029929	5	0.0033747	0.013842	0.989383	207	2	0.041398	0.11893	0.24773	0.995008	3857	2	0.041398
FBgn0011766	10	0.00338	0.017912	0.989383	208	4	0.054755	0.22851	0.47014	0.996647	6123	4	0.054755
FBgn0034269	6	0.0033843	0.014494	0.989383	209	5	-0.65333	0.58542	0.72077	0.996911	10828	1	-0.65333
FBgn0038653	6	0.0033872	0.014505	0.989383	210	3	-0.58402	0.83032	0.84283	0.999611	13095	1	-0.58402
FBgn0035025	6	0.0034085	0.014574	0.989383	211	5	-0.89809	0.99282	0.99286	0.999874	15506	0	-0.89809
FBgn0043043	6	0.0034085	0.014574	0.989383	212	5	-0.91456	0.99499	0.99502	0.999874	15539	0	-0.91456
FBgn0267261	4	0.0034364	0.01207	0.989383	213	3	-1.0526	0.98087	0.98084	0.999611	15319	0	-1.0526
FBgn0261680	2	0.0034521	0.0065839	0.879369	214	2	-2.0034	0.99655	0.99646	0.999874	15563	0	-2.0034
FBgn0029959	6	0.0034536	0.01475	0.989383	215	2	0.078601	0.52234	0.66766	0.996647	10042	1	0.078601
FBgn0038395	6	0.0035244	0.015021	0.989383	216	5	-0.40878	0.55772	0.69723	0.996647	10490	1	-0.40878
FBgn0005694	4	0.0035444	0.012431	0.989383	217	4	-0.53188	0.99646	0.99648	0.999874	15562	0	-0.53188
FBgn0010235	6	0.0035451	0.0151	0.989383	218	4	-0.8366	0.93511	0.93499	0.999611	14590	0	-0.8366
FBgn0050016	4	0.0035728	0.012514	0.989383	219	4	-0.38553	0.99643	0.99645	0.999874	15559	0	-0.38553
FBgn0034282	6	0.003607	0.015346	0.989383	220	5	-0.97237	0.97407	0.9741	0.999611	15211	0	-0.97237
FBgn0037687	3	0.0036147	0.010045	0.989383	221	1	0.15956	0.22881	0.34701	0.995008	6130	2	0.15956
FBgn0004644	6	0.003634	0.015455	0.989383	222	4	-0.40328	0.60329	0.73635	0.999611	11029	2	-0.40328
FBgn0260720	4	0.0036364	0.012726	0.989383	223	3	-0.88614	0.635	0.65979	0.996647	11276	1	-0.88614
FBgn0003612	6	0.0036658	0.015564	0.989383	224	5	-0.90872	0.99061	0.99064	0.999763	15472	0	-0.90872
FBgn0035299	6	0.0036759	0.015598	0.989383	225	3	-0.53258	0.3863	0.5598	0.996647	8464	1	-0.53258
FBgn0036805	6	0.003699	0.015688	0.989383	226	5	-0.52749	0.91054	0.91025	0.999611	14189	0	-0.52749
FBgn0267242	4	0.0037742	0.013189	0.989383	227	2	-0.094596	0.40061	0.5277	0.996647	8634	1	-0.094596
FBgn0034295	6	0.0037834	0.016009	0.989383	228	5	-0.35223	0.98413	0.98418	0.999611	15379	0	-0.35223
FBgn0086655	9	0.0037909	0.019566	0.989383	229	4	-0.50526	0.13034	0.32313	0.995008	4112	2	-0.50526
FBgn0267210	4	0.0038216	0.013355	0.989383	230	2	-0.30999	0.049998	0.11807	0.995008	2027	1	-0.30999
FBgn0266209	4	0.0038994	0.013613	0.989383	231	3	-0.87774	0.57822	0.62287	0.996647	10733	1	-0.87774
FBgn0031829	4	0.0038994	0.013613	0.989383	232	3	-0.63619	0.93037	0.92997	0.999611	14514	0	-0.63619
FBgn0039286	6	0.0039049	0.016479	0.989383	233	5	-0.44195	0.95378	0.95371	0.999611	14883	0	-0.44195
FBgn0036916	6	0.0039135	0.016505	0.989383	234	5	-0.44086	0.31629	0.50663	0.996647	7585	1	-0.44086
FBgn0032430	6	0.0039214	0.016536	0.989383	235	4	-0.54424	0.85361	0.85922	0.999611	13385	1	-0.54424
FBgn0003410	6	0.0039255	0.016551	0.989383	236	5	-0.53385	0.95065	0.95052	0.999611	14832	0	-0.53385
FBgn0036187	4	0.0039376	0.013747	0.989383	237	2	-0.27626	0.9361	0.9358	0.999611	14605	0	-0.27626
FBgn0032586	7	0.0039452	0.018619	0.989383	238	5	-0.57606	0.94959	0.94953	0.999611	14813	0	-0.57606
FBgn0052304	6	0.0039475	0.016632	0.989383	239	4	-0.37598	0.94798	0.94781	0.999611	14792	0	-0.37598
FBgn0058053	4	0.0039552	0.013804	0.989383	240	3	-0.83697	0.5363	0.59801	0.996647	10217	1	-0.83697
FBgn0015561	6	0.0040106	0.016882	0.989383	241	5	-0.74988	0.99676	0.99673	0.999874	15565	0	-0.74988
FBgn0026143	4	0.0040112	0.01399	0.989383	242	2	-0.34506	0.71426	0.7194	0.996911	11911	1	-0.34506
FBgn0039461	6	0.0040223	0.016926	0.989383	243	1	0.058856	0.52019	0.66594	0.996647	10013	2	0.058856
FBgn0031970	6	0.0040278	0.01694	0.989383	244	2	-0.22419	0.51482	0.66155	0.996647	9949	2	-0.22419
FBgn0037172	6	0.0040317	0.016957	0.989383	245	5	-0.55564	0.56019	0.69931	0.996647	10521	1	-0.55564
FBgn0243514	6	0.0040507	0.01703	0.989383	246	3	-0.94676	0.91845	0.91812	0.999611	14300	0	-0.94676
FBgn0037933	6	0.0040772	0.017125	0.989383	247	4	-0.61678	0.96088	0.96092	0.999611	14996	0	-0.61678
FBgn0000274	6	0.0040934	0.017198	0.989383	248	2	-0.17071	0.76578	0.8052	0.999611	12390	1	-0.17071
FBgn0037765	6	0.0040968	0.017209	0.989383	249	5	-0.32711	0.41044	0.57856	0.996647	8752	1	-0.32711
FBgn0001612	4	0.004106	0.014305	0.989383	250	3	-0.67003	0.88321	0.88277	0.999611	13780	0	-0.67003
FBgn0032188	6	0.0041645	0.017447	0.989383	251	3	-0.14882	0.20221	0.37773	0.995008	5614	2	-0.14882
FBgn0265444	4	0.0041773	0.014551	0.989383	252	2	-0.31494	0.89438	0.89393	0.999611	13944	0	-0.31494
FBgn0037798	4	0.0042007	0.014633	0.989383	253	3	-1.0787	0.94196	0.94171	0.999611	14688	0	-1.0787
FBgn0264815	12	0.0042226	0.023537	0.994442	254	8	-0.37985	0.1051	0.29972	0.995008	3574	1	-0.37985
FBgn0259735	8	0.0042233	0.01969	0.989383	255	5	-0.51506	0.65634	0.79155	0.999611	11441	2	-0.51506
FBgn0039085	6	0.0042355	0.017723	0.989383	256	1	0.27736	0.067872	0.17901	0.995008	2609	3	0.27736
FBgn0051028	6	0.0042924	0.017947	0.989383	257	5	-0.30661	0.99056	0.9906	0.999763	15471	0	-0.30661
FBgn0038558	6	0.0043066	0.018003	0.989383	258	2	-0.163	0.74967	0.79719	0.999611	12227	1	-0.163
FBgn0028669	5	0.0043288	0.016798	0.989383	259	4	-0.47409	0.63348	0.70187	0.99676	11266	1	-0.47409
FBgn0016917	6	0.0043522	0.018167	0.989383	260	5	-0.60794	0.99566	0.99569	0.999874	15553	0	-0.60794
FBgn0038180	6	0.0043594	0.018194	0.989383	261	3	0.052169	0.011576	0.04412	0.98853	638	3	0.052169
FBgn0264890	4	0.0043613	0.015168	0.989383	262	4	-0.38111	0.99564	0.99565	0.999874	15551	0	-0.38111
FBgn0263027	6	0.0043676	0.01822	0.989383	263	3	-0.29521	0.33749	0.52266	0.996647	7858	1	-0.29521
FBgn0051882	6	0.0043776	0.018254	0.989383	264	2	-0.048978	0.90743	0.90711	0.999611	14153	0	-0.048978
FBgn0085465	5	0.0044131	0.01704	0.989383	265	4	-0.70459	0.13297	0.27032	0.995008	4170	1	-0.70459
FBgn0037270	6	0.004419	0.018404	0.989383	266	3	-0.2029	0.15789	0.31732	0.995008	4712	3	-0.2029
FBgn0036639	6	0.0044714	0.018597	0.989383	267	3	-0.27304	0.45295	0.61188	0.996647	9231	1	-0.27304
FBgn0265156	4	0.0044762	0.015552	0.989383	268	2	-0.38004	0.86413	0.86379	0.999611	13520	0	-0.38004
FBgn0033468	6	0.0044952	0.01869	0.989383	269	3	-0.43971	0.59559	0.72955	0.998569	10954	1	-0.43971
FBgn0036750	6	0.0045013	0.018714	0.989383	270	5	-0.57402	0.52321	0.66841	0.996647	10060	1	-0.57402
FBgn0033873	6	0.0045197	0.018793	0.989383	271	1	0.65515	0.051748	0.14298	0.995008	2090	4	0.65515
FBgn0051974	4	0.0045285	0.015723	0.989383	272	3	-1.152	0.98342	0.98342	0.999611	15370	0	-1.152
FBgn0030274	5	0.00455	0.017487	0.989383	273	3	-0.973	0.96113	0.96131	0.999611	14999	0	-0.973
FBgn0261932	4	0.0045799	0.015898	0.989383	274	2	-0.65871	0.9845	0.98451	0.999611	15387	0	-0.65871
FBgn0010316	6	0.0045908	0.01905	0.989383	275	2	-0.4499	0.38725	0.56053	0.996647	8480	2	-0.4499
FBgn0037988	6	0.0045924	0.019052	0.989383	276	3	-0.25134	0.87082	0.87294	0.999611	13603	1	-0.25134
FBgn0030286	6	0.0046077	0.01911	0.989383	277	2	0.052542	0.1895	0.36056	0.995008	5347	3	0.052542
FBgn0031275	7	0.0046184	0.02133	0.992993	278	5	-0.27394	0.5626	0.71329	0.996911	10543	1	-0.27394
FBgn0083960	6	0.0046251	0.019185	0.989383	279	5	-0.33295	0.57484	0.7117	0.996911	10690	1	-0.33295
FBgn0038592	6	0.0046315	0.019211	0.989383	280	4	-0.45033	0.48081	0.63402	0.996647	9545	2	-0.45033
FBgn0052708	6	0.0046567	0.019301	0.989383	281	4	-0.64177	0.48341	0.63615	0.996647	9574	2	-0.64177
FBgn0000166	6	0.0046567	0.019301	0.989383	282	4	-0.83053	0.016319	0.057909	0.990489	839	2	-0.83053
FBgn0265188	6	0.0046618	0.019318	0.989383	283	3	-0.5278	0.9516	0.95148	0.999611	14849	0	-0.5278
FBgn0015279	4	0.0046829	0.016256	0.989383	284	2	-0.52727	0.42566	0.53965	0.996647	8904	1	-0.52727
FBgn0004778	6	0.0047094	0.019477	0.989383	285	2	0.057379	0.090501	0.2218	0.995008	3236	3	0.057379
FBgn0035533	4	0.0047161	0.016368	0.989383	286	4	-0.79275	0.99528	0.9953	0.999874	15545	0	-0.79275
FBgn0263981	4	0.0047161	0.016368	0.989383	287	4	-0.99911	0.99528	0.9953	0.999874	15544	0	-0.99911
FBgn0265253	4	0.0047194	0.016382	0.989383	288	2	-0.61066	0.91946	0.91913	0.999611	14317	0	-0.61066
FBgn0265719	4	0.0047219	0.016394	0.989383	289	3	-1.7552	0.912	0.91174	0.999611	14223	0	-1.7552
FBgn0039010	6	0.0047403	0.01959	0.989383	290	5	-0.59093	0.96165	0.96169	0.999611	15008	0	-0.59093
FBgn0053002	6	0.0047403	0.01959	0.989383	291	5	-0.71923	0.98949	0.98951	0.999763	15454	0	-0.71923
FBgn0036258	5	0.0047534	0.018166	0.989383	292	3	-0.25031	0.75208	0.77023	0.999611	12258	1	-0.25031
FBgn0003423	9	0.0048565	0.024455	0.994442	293	2	0.14474	0.099248	0.26805	0.995008	3454	5	0.14474
FBgn0266846	4	0.004864	0.01688	0.989383	294	3	-1.0289	0.7066	0.71312	0.996911	11837	1	-1.0289
FBgn0263608	6	0.0049459	0.020356	0.992993	295	3	-0.72251	0.26549	0.46059	0.996647	6825	1	-0.72251
FBgn0034838	6	0.0049818	0.020483	0.992993	296	5	-0.60067	0.93253	0.93237	0.999611	14543	0	-0.60067
FBgn0261274	6	0.0049818	0.020483	0.992993	297	5	-0.51348	0.99442	0.99443	0.999874	15532	0	-0.51348
FBgn0264500	4	0.0050061	0.017326	0.989383	298	2	-0.47427	0.34547	0.48468	0.996647	7974	1	-0.47427
FBgn0030844	6	0.0050395	0.020695	0.992993	299	3	-0.34595	0.98759	0.9876	0.999763	15434	0	-0.34595
FBgn0037960	5	0.0050706	0.019166	0.989383	300	3	-0.55817	0.98274	0.98281	0.999611	15358	0	-0.55817
FBgn0005638	6	0.0050828	0.020847	0.992993	301	4	-0.70179	0.88674	0.88687	0.999611	13824	1	-0.70179
FBgn0003278	6	0.0050879	0.020867	0.992993	302	3	-0.39029	0.44019	0.60189	0.996647	9069	1	-0.39029
FBgn0267303	4	0.0051009	0.017653	0.989383	303	2	-0.04334	0.50874	0.5826	0.996647	9879	1	-0.04334
FBgn0051693	6	0.0051037	0.020924	0.992993	304	3	-0.58653	0.92371	0.92352	0.999611	14393	0	-0.58653
FBgn0036342	6	0.005126	0.021009	0.992993	305	4	-0.82543	0.37823	0.55362	0.996647	8359	1	-0.82543
FBgn0032382	6	0.0051355	0.021038	0.992993	306	4	-0.33427	0.69776	0.77404	0.999611	11761	1	-0.33427
FBgn0001983	6	0.0051399	0.021056	0.992993	307	4	-0.51527	0.80302	0.82562	0.999611	12758	1	-0.51527
FBgn0261991	6	0.0051551	0.021122	0.992993	308	3	-0.33846	0.51825	0.66436	0.996647	9988	2	-0.33846
FBgn0267579	6	0.005159	0.021133	0.992993	309	1	-0.033221	0.2939	0.49018	0.996647	7263	2	-0.033221
FBgn0000592	6	0.0052086	0.021335	0.992993	310	2	-0.22851	0.16466	0.32664	0.995008	4865	2	-0.22851
FBgn0027505	6	0.00521	0.021343	0.992993	311	4	-0.55353	0.92154	0.92128	0.999611	14358	0	-0.55353
FBgn0265891	4	0.0052107	0.018014	0.989383	312	3	-0.64445	0.33588	0.47404	0.996647	7842	1	-0.64445
FBgn0040372	4	0.0052121	0.018018	0.989383	313	2	-0.33869	0.05363	0.12546	0.995008	2158	2	-0.33869
FBgn0267659	4	0.0052121	0.018018	0.989383	314	2	-0.92176	0.96473	0.96454	0.999611	15071	0	-0.92176
FBgn0028514	6	0.0052497	0.02149	0.99357	315	2	-0.09141	0.0093763	0.036355	0.980433	528	2	-0.09141
FBgn0027793	6	0.005301	0.021698	0.994442	316	1	0.22163	0.012987	0.049	0.98853	716	5	0.22163
FBgn0265714	6	0.0053019	0.021701	0.994442	317	5	-0.57565	0.99298	0.993	0.999874	15509	0	-0.57565
FBgn0038646	6	0.0053039	0.021708	0.994442	318	5	-0.64831	0.84315	0.85167	0.999611	13261	1	-0.64831
FBgn0029885	6	0.0053525	0.021871	0.994442	319	5	-0.40118	0.99859	0.99854	0.999874	15598	0	-0.40118
FBgn0267145	4	0.0053626	0.018502	0.989383	320	3	-0.59759	0.34733	0.4867	0.996647	8004	1	-0.59759
FBgn0038533	3	0.0053911	0.014904	0.989383	321	2	-1.5754	0.95895	0.95922	0.999611	14968	0	-1.5754
FBgn0051140	6	0.0053968	0.022051	0.994442	322	3	-0.26406	0.64581	0.75399	0.999611	11359	1	-0.26406
FBgn0003731	7	0.0054124	0.024104	0.994442	323	4	-0.91831	0.81806	0.85672	0.999611	12936	1	-0.91831
FBgn0030440	6	0.0054429	0.022205	0.994442	324	4	-0.58832	0.98982	0.98985	0.999763	15458	0	-0.58832
FBgn0037516	6	0.0054542	0.02225	0.994442	325	2	-0.067509	0.54467	0.68638	0.996647	10317	2	-0.067509
FBgn0036926	6	0.005468	0.022307	0.994442	326	4	-0.40789	0.0028135	0.012344	0.980433	177	1	-0.40789
FBgn0039439	6	0.0054923	0.022389	0.994442	327	4	-0.51297	0.98602	0.98606	0.999763	15411	0	-0.51297
FBgn0037574	5	0.0055001	0.020535	0.992993	328	2	-0.9996	0.73636	0.75984	0.999611	12090	1	-0.9996
FBgn0030283	6	0.0055139	0.022477	0.994442	329	2	-0.13794	0.36825	0.54593	0.996647	8249	2	-0.13794
FBgn0034061	5	0.0055323	0.020634	0.992993	330	3	-0.65454	0.70512	0.74071	0.999611	11824	1	-0.65454
FBgn0031749	6	0.0055657	0.022664	0.994442	331	5	-0.30345	0.92812	0.92793	0.999611	14477	0	-0.30345
FBgn0035193	6	0.0055849	0.022739	0.994442	332	1	-0.086347	0.52397	0.66902	0.996647	10075	2	-0.086347
FBgn0267245	4	0.0055938	0.019275	0.989383	333	2	-0.16739	0.24382	0.37148	0.995008	6423	2	-0.16739
FBgn0052528	6	0.0056035	0.022805	0.994442	334	2	-0.37066	0.039597	0.11498	0.995008	1708	2	-0.37066
FBgn0050345	6	0.0056934	0.023152	0.994442	335	4	-0.33429	0.58986	0.72454	0.996911	10885	1	-0.33429
FBgn0265830	4	0.0057059	0.019681	0.989383	336	4	-0.57677	0.99429	0.99433	0.999874	15530	0	-0.57677
FBgn0085438	6	0.0057503	0.023351	0.994442	337	3	-0.258	0.79781	0.82263	0.999611	12705	1	-0.258
FBgn0038331	6	0.0057503	0.023351	0.994442	338	3	-0.28735	0.92314	0.92291	0.999611	14386	0	-0.28735
FBgn0010407	6	0.0057503	0.023351	0.994442	339	4	-0.70459	0.85238	0.85831	0.999611	13375	1	-0.70459
FBgn0260794	5	0.0057822	0.021414	0.992993	340	3	-0.43381	0.79419	0.80077	0.999611	12670	1	-0.43381
FBgn0030575	6	0.0057978	0.023531	0.994442	341	3	-0.1827	0.49152	0.64266	0.996647	9681	2	-0.1827
FBgn0014269	6	0.0058343	0.023669	0.994442	342	3	-0.46898	0.079039	0.203	0.995008	2940	2	-0.46898
FBgn0267634	4	0.0058368	0.020105	0.992993	343	4	-0.51766	0.99416	0.9942	0.999874	15529	0	-0.51766
FBgn0041225	6	0.0058688	0.023789	0.994442	344	3	-0.61441	0.91674	0.91639	0.999611	14278	0	-0.61441
FBgn0037828	6	0.0058733	0.023807	0.994442	345	5	-0.5882	0.83256	0.84433	0.999611	13129	1	-0.5882
FBgn0038795	4	0.0058743	0.020236	0.992993	346	3	-0.55187	0.2625	0.39228	0.995008	6775	1	-0.55187
FBgn0266000	8	0.0058778	0.026317	0.994442	347	5	-0.66436	0.44523	0.66001	0.996647	9140	2	-0.66436
FBgn0267912	8	0.0059072	0.026435	0.994442	348	4	-0.31686	0.97121	0.97137	0.999611	15172	0	-0.31686
FBgn0040227	6	0.005909	0.023942	0.994442	349	4	-0.45532	0.22437	0.40693	0.995008	6053	2	-0.45532
FBgn0027602	6	0.0059397	0.024064	0.994442	350	1	-0.16805	0.89982	0.89959	0.999611	14032	0	-0.16805
FBgn0086707	6	0.0059458	0.024085	0.994442	351	3	-0.18038	0.079489	0.20397	0.995008	2950	1	-0.18038
FBgn0033547	3	0.0059461	0.016358	0.989383	352	3	-0.78201	0.99405	0.99413	0.999874	15526	0	-0.78201
FBgn0039872	6	0.0059686	0.024166	0.994442	353	5	-0.58444	0.99794	0.99789	0.999874	15586	0	-0.58444
FBgn0066304	2	0.0059719	0.011319	0.989383	354	2	-0.78737	0.99403	0.99388	0.999874	15524	0	-0.78737
FBgn0011829	6	0.0060143	0.024327	0.994442	355	3	-0.64756	0.25241	0.4438	0.996647	6580	1	-0.64756
FBgn0037778	6	0.0060189	0.024346	0.994442	356	5	-0.6053	0.96146	0.9615	0.999611	15005	0	-0.6053
FBgn0262903	4	0.0060477	0.020786	0.992993	357	1	-0.10928	0.43835	0.5459	0.996647	9045	1	-0.10928
FBgn0030954	6	0.0060525	0.024465	0.994442	358	3	-0.25817	0.9797	0.97971	0.999611	15293	0	-0.25817
FBgn0265979	4	0.0060736	0.020883	0.992993	359	3	-0.39622	0.77267	0.77208	0.999611	12444	1	-0.39622
FBgn0038242	6	0.0060921	0.0246	0.994442	360	5	-0.28139	0.71463	0.78115	0.999611	11916	1	-0.28139
FBgn0033065	6	0.0061205	0.024698	0.994442	361	2	-0.022738	0.95471	0.95466	0.999611	14892	0	-0.022738
FBgn0267105	6	0.0061205	0.024698	0.994442	362	3	-0.33345	0.31953	0.50907	0.996647	7636	1	-0.33345
FBgn0265011	6	0.0061526	0.024816	0.994442	363	4	-0.29974	0.96239	0.96245	0.999611	15023	0	-0.29974
FBgn0000568	16	0.0061625	0.036204	0.994442	364	6	-0.22244	0.22395	0.52211	0.996647	6042	5	-0.22244
FBgn0037428	6	0.0061789	0.024919	0.994442	365	3	-0.017166	0.079023	0.20297	0.995008	2939	3	-0.017166
FBgn0261994	4	0.006233	0.021384	0.992993	366	3	-0.37982	0.95507	0.95483	0.999611	14897	0	-0.37982
FBgn0004854	6	0.0063056	0.025382	0.994442	367	2	-0.63423	0.15689	0.3159	0.995008	4686	2	-0.63423
FBgn0033158	6	0.0063056	0.025382	0.994442	368	2	-0.053034	0.29095	0.48802	0.996647	7234	2	-0.053034
FBgn0039219	3	0.0063084	0.017313	0.989383	369	3	-1.2444	0.99369	0.99379	0.999874	15519	0	-1.2444
FBgn0051105	6	0.0063654	0.025602	0.994442	370	3	-0.48196	0.043991	0.12527	0.995008	1841	1	-0.48196
FBgn0266357	4	0.0063851	0.021888	0.994442	371	4	-0.51759	0.99361	0.99364	0.999874	15518	0	-0.51759
FBgn0046302	6	0.0064043	0.025765	0.994442	372	5	-0.36709	0.58943	0.72417	0.996911	10880	1	-0.36709
FBgn0265991	9	0.0064245	0.030458	0.994442	373	6	-0.57774	0.92557	0.93849	0.999611	14426	1	-0.57774
FBgn0022029	6	0.006427	0.025849	0.994442	374	2	-0.10431	0.50884	0.6567	0.996647	9884	2	-0.10431
FBgn0030940	6	0.0064364	0.025882	0.994442	375	1	0.42124	0.097794	0.23248	0.995008	3429	3	0.42124
FBgn0031130	6	0.0064444	0.025907	0.994442	376	4	-0.43271	0.55966	0.69885	0.996647	10513	2	-0.43271
FBgn0004595	10	0.0064485	0.031463	0.994442	377	6	-0.60755	0.96603	0.96805	0.999611	15088	1	-0.60755
FBgn0060296	6	0.0064547	0.025942	0.994442	378	5	-0.62847	0.96414	0.96422	0.999611	15053	0	-0.62847
FBgn0039858	6	0.0064547	0.025942	0.994442	379	5	-0.68616	0.99869	0.99864	0.999874	15603	0	-0.68616
FBgn0002023	15	0.0064738	0.036699	0.994442	380	8	-0.28615	0.9991	0.9991	0.999874	15610	0	-0.28615
FBgn0267087	4	0.0064874	0.022219	0.994442	381	2	-0.10351	0.31211	0.44756	0.996647	7520	2	-0.10351
FBgn0030300	6	0.0065095	0.026126	0.994442	382	4	-0.37352	0.64241	0.75277	0.999611	11331	1	-0.37352
FBgn0033021	6	0.0065338	0.026207	0.994442	383	4	-0.45029	0.98433	0.98438	0.999611	15384	0	-0.45029
FBgn0003733	6	0.0065469	0.026252	0.994442	384	5	-0.50444	0.95082	0.95068	0.999611	14833	0	-0.50444
FBgn0266372	4	0.0065682	0.022465	0.994442	385	3	-0.73073	0.97576	0.97566	0.999611	15231	0	-0.73073
FBgn0004870	6	0.0066099	0.026462	0.994442	386	5	-0.3521	0.81977	0.83588	0.999611	12961	1	-0.3521
FBgn0011745	6	0.0066137	0.02647	0.994442	387	2	-0.092614	0.47415	0.62873	0.996647	9469	2	-0.092614
FBgn0003308	6	0.0066137	0.02647	0.994442	388	3	-0.65476	0.76294	0.80379	0.999611	12366	1	-0.65476
FBgn0036349	6	0.0066194	0.02648	0.994442	389	4	-0.48403	0.96842	0.96853	0.999611	15121	0	-0.48403
FBgn0024986	1	0.006626	0.0065794	0.879369	390	1	-3.2134	0.99337	0.99344	0.999874	15514	0	-3.2134
FBgn0265836	6	0.0066315	0.026518	0.994442	391	4	-0.31949	0.58863	0.7235	0.996911	10870	1	-0.31949
FBgn0039770	6	0.00672	0.026859	0.994442	392	2	-0.36701	0.35451	0.53548	0.996647	8089	2	-0.36701
FBgn0267722	4	0.0067337	0.022964	0.994442	393	3	-0.3051	0.83063	0.8301	0.999611	13102	0	-0.3051
FBgn0011455	4	0.006772	0.023096	0.994442	394	3	-0.55507	0.96443	0.96424	0.999611	15062	0	-0.55507
FBgn0033090	6	0.0067909	0.027137	0.994442	395	3	-0.22267	0.058833	0.15904	0.995008	2326	2	-0.22267
FBgn0261617	9	0.0067971	0.031906	0.994442	396	5	-0.58628	0.57546	0.77318	0.999611	10698	1	-0.58628
FBgn0043791	6	0.0068099	0.027202	0.994442	397	5	-0.50399	0.83102	0.84331	0.999611	13109	1	-0.50399
FBgn0267366	6	0.0068694	0.027399	0.994442	398	2	-0.14944	0.22736	0.41091	0.995697	6106	2	-0.14944
FBgn0001233	5	0.0068763	0.024681	0.994442	399	3	-0.91341	0.22224	0.38316	0.995008	6015	2	-0.91341
FBgn0037414	6	0.0068855	0.027464	0.994442	400	4	-0.34045	0.99613	0.99613	0.999874	15555	0	-0.34045
FBgn0019809	6	0.0068973	0.027502	0.994442	401	1	-0.065466	0.0070187	0.027978	0.980433	396	3	-0.065466
FBgn0031878	4	0.0069011	0.023488	0.994442	402	2	-0.2908	0.19684	0.31924	0.995008	5491	2	-0.2908
FBgn0265964	4	0.0069136	0.023529	0.994442	403	4	-0.41106	0.99309	0.99311	0.999874	15511	0	-0.41106
FBgn0263452	4	0.0069199	0.023552	0.994442	404	3	-0.46665	0.84432	0.84382	0.999611	13271	0	-0.46665
FBgn0010263	8	0.0069454	0.030603	0.994442	405	5	-0.44754	0.91961	0.92587	0.999611	14321	1	-0.44754
FBgn0040309	8	0.0069464	0.030605	0.994442	406	4	-0.51286	0.74541	0.84964	0.999611	12183	2	-0.51286
FBgn0035852	6	0.0069531	0.027692	0.994442	407	4	-0.34809	0.76578	0.8052	0.999611	12389	1	-0.34809
FBgn0266053	5	0.0069662	0.024936	0.994442	408	3	-1.0669	0.38996	0.53828	0.996647	8513	1	-1.0669
FBgn0085285	6	0.007011	0.027908	0.994442	409	4	-0.6827	0.5411	0.68333	0.996647	10279	2	-0.6827
FBgn0030686	2	0.0070369	0.013251	0.989383	410	2	-1.807	0.99296	0.99281	0.999874	15507	0	-1.807
FBgn0259711	6	0.0070408	0.028023	0.994442	411	4	-0.47811	0.047112	0.1324	0.995008	1930	2	-0.47811
FBgn0261799	6	0.0070502	0.028054	0.994442	412	4	-0.35462	0.76536	0.80497	0.999611	12385	1	-0.35462
FBgn0038238	6	0.0070566	0.028076	0.994442	413	3	-0.3002	0.28462	0.48338	0.996647	7153	2	-0.3002
FBgn0037570	6	0.0071216	0.028325	0.994442	414	4	-0.47278	0.97593	0.97598	0.999611	15233	0	-0.47278
FBgn0001313	6	0.0071524	0.028456	0.994442	415	3	-0.1601	0.95422	0.95416	0.999611	14889	0	-0.1601
FBgn0038903	6	0.0071524	0.028456	0.994442	416	2	-0.1239	0.93449	0.93434	0.999611	14577	0	-0.1239
FBgn0034663	6	0.0071624	0.028486	0.994442	417	5	-0.51674	0.99257	0.99261	0.999874	15503	0	-0.51674
FBgn0035009	6	0.0072367	0.028745	0.994442	418	3	-0.37949	0.64809	0.75478	0.999611	11381	1	-0.37949
FBgn0038438	6	0.0072672	0.028854	0.994442	419	4	-0.80889	0.99331	0.99333	0.999874	15513	0	-0.80889
FBgn0030833	6	0.0072672	0.028854	0.994442	420	5	-0.60421	0.77718	0.8111	0.999611	12494	1	-0.60421
FBgn0029740	6	0.0072885	0.028916	0.994442	421	2	0.045139	0.15125	0.30808	0.995008	4571	1	0.045139
FBgn0283535	5	0.0072952	0.02588	0.994442	422	3	-0.30095	0.14161	0.2843	0.995008	4372	2	-0.30095
FBgn0020379	6	0.0073208	0.029037	0.994442	423	5	-0.57466	0.99464	0.99465	0.999874	15536	0	-0.57466
FBgn0037057	9	0.0073558	0.033991	0.994442	424	5	-0.38359	0.62348	0.79464	0.999611	11199	1	-0.38359
FBgn0038727	6	0.0073581	0.029166	0.994442	425	4	-0.37187	0.34897	0.53131	0.996647	8030	2	-0.37187
FBgn0002862	4	0.0074194	0.025181	0.994442	426	1	0.20991	0.55037	0.60617	0.996647	10390	1	0.20991
FBgn0000233	6	0.0074289	0.029428	0.994442	427	3	-0.27894	0.53626	0.67919	0.996647	10216	2	-0.27894
FBgn0265377	4	0.0074366	0.025246	0.994442	428	2	-0.72504	0.7991	0.79864	0.999611	12721	0	-0.72504
FBgn0029887	5	0.0074906	0.026468	0.994442	429	2	-0.38781	0.6889	0.73132	0.99899	11688	1	-0.38781
FBgn0033875	6	0.0075197	0.029789	0.994442	430	5	-0.37922	0.71745	0.78237	0.999611	11931	1	-0.37922
FBgn0032647	6	0.0075456	0.02989	0.994442	431	2	-0.081094	0.46232	0.61938	0.996647	9327	2	-0.081094
FBgn0037758	6	0.0075642	0.02996	0.994442	432	4	-0.62219	0.89923	0.89905	0.999611	14024	0	-0.62219
FBgn0037486	6	0.0075642	0.02996	0.994442	433	4	-0.82114	0.88655	0.88669	0.999611	13821	1	-0.82114
FBgn0031047	6	0.0075707	0.029986	0.994442	434	3	-0.3574	0.52711	0.67161	0.996647	10113	2	-0.3574
FBgn0260793	2	0.0075802	0.014233	0.989383	435	1	-0.67178	0.27774	0.30432	0.995008	7048	1	-0.67178
FBgn0025627	6	0.0076134	0.030156	0.994442	436	2	-0.029726	0.44977	0.60937	0.996647	9192	1	-0.029726
FBgn0039519	6	0.0076277	0.030215	0.994442	437	4	-0.48176	0.7173	0.78231	0.999611	11929	1	-0.48176
FBgn0033778	6	0.0076404	0.030263	0.994442	438	3	-0.55151	0.34836	0.53085	0.996647	8022	2	-0.55151
FBgn0046696	4	0.0076812	0.026025	0.994442	439	3	-0.69658	0.94489	0.94463	0.999611	14743	0	-0.69658
FBgn0031598	6	0.0077124	0.030505	0.994442	440	1	0.17697	0.1886	0.3593	0.995008	5326	3	0.17697
FBgn0038057	4	0.0077454	0.026243	0.994442	441	4	-1.0218	0.99225	0.99231	0.999874	15501	0	-1.0218
FBgn0011576	6	0.0077497	0.030654	0.994442	442	2	-0.29255	0.05012	0.13926	0.995008	2032	3	-0.29255
FBgn0041252	6	0.007803	0.030848	0.994442	443	3	-0.3058	0.53394	0.67727	0.996647	10192	1	-0.3058
FBgn0036449	4	0.0078041	0.026437	0.994442	444	2	-1.0211	0.79536	0.79481	0.999611	12682	0	-1.0211
FBgn0020765	5	0.0078083	0.027417	0.994442	445	3	-0.73166	0.74361	0.76455	0.999611	12169	1	-0.73166
FBgn0032744	4	0.0078448	0.02657	0.994442	446	2	0.25242	0.086259	0.18889	0.995008	3125	2	0.25242
FBgn0027342	6	0.0079249	0.031282	0.994442	447	4	-0.3378	0.58441	0.71994	0.996911	10808	2	-0.3378
FBgn0260933	4	0.0079394	0.026869	0.994442	448	1	-0.46181	0.75026	0.75094	0.999611	12237	1	-0.46181
FBgn0026433	6	0.0079958	0.031556	0.994442	449	3	-0.062206	0.853	0.85878	0.999611	13380	1	-0.062206
FBgn0036180	4	0.0080102	0.02709	0.994442	450	1	0.079061	0.16796	0.28677	0.995008	4920	2	0.079061
FBgn0015522	6	0.0080234	0.031653	0.994442	451	4	-0.48004	0.9382	0.93812	0.999611	14631	0	-0.48004
FBgn0024251	8	0.008058	0.035051	0.994442	452	2	-0.043183	0.73929	0.84536	0.999611	12116	2	-0.043183
FBgn0033204	6	0.0080666	0.031787	0.994442	453	4	-0.60692	0.54957	0.69045	0.996647	10376	2	-0.60692
FBgn0025683	6	0.0080683	0.031793	0.994442	454	4	-0.44535	0.62568	0.74684	0.999611	11211	1	-0.44535
FBgn0051230	6	0.0081093	0.031937	0.994442	455	5	-0.36283	0.85865	0.86316	0.999611	13449	1	-0.36283
FBgn0016034	6	0.0081093	0.031937	0.994442	456	5	-1.0514	0.9991	0.99911	0.999874	15612	0	-1.0514
FBgn0030528	6	0.0081093	0.031937	0.994442	457	5	-0.44213	0.61623	0.74358	0.999611	11145	1	-0.44213
FBgn0259917	6	0.0081188	0.031967	0.994442	458	3	-0.58739	0.79369	0.82016	0.999611	12665	1	-0.58739
FBgn0267431	6	0.0081749	0.032167	0.994442	459	4	-0.42208	0.95854	0.95855	0.999611	14965	0	-0.42208
FBgn0053533	6	0.0081786	0.032178	0.994442	460	5	-0.51267	0.69286	0.7721	0.999611	11731	1	-0.51267
FBgn0267447	4	0.0081925	0.027663	0.994442	461	2	-0.23224	0.4119	0.53299	0.996647	8768	1	-0.23224
FBgn0265595	6	0.0082083	0.032283	0.994442	462	3	-0.19405	0.91116	0.91089	0.999611	14201	0	-0.19405
FBgn0038450	6	0.0082084	0.032285	0.994442	463	4	-0.63686	0.77718	0.8111	0.999611	12496	1	-0.63686
FBgn0036008	4	0.0082229	0.027761	0.994442	464	2	-0.38941	0.83032	0.82978	0.999611	13097	0	-0.38941
FBgn0002932	7	0.0082328	0.03359	0.994442	465	3	-0.059408	0.59101	0.73326	0.999526	10905	2	-0.059408
FBgn0265266	5	0.0082331	0.028706	0.994442	466	4	-0.43797	0.36433	0.51437	0.996647	8198	1	-0.43797
FBgn0033330	6	0.0082358	0.032378	0.994442	467	3	-0.22789	0.55329	0.69353	0.996647	10436	2	-0.22789
FBgn0027291	6	0.008246	0.032413	0.994442	468	5	-0.49293	0.99775	0.9977	0.999874	15582	0	-0.49293
FBgn0266441	6	0.0083063	0.032599	0.994442	469	4	-0.38505	0.97228	0.97237	0.999611	15188	0	-0.38505
FBgn0039509	6	0.0083096	0.032616	0.994442	470	5	-0.36969	0.8287	0.8417	0.999611	13078	1	-0.36969
FBgn0003525	6	0.0083096	0.032616	0.994442	471	5	-0.44008	0.92562	0.92545	0.999611	14440	0	-0.44008
FBgn0020270	6	0.0083499	0.032744	0.994442	472	2	0.066035	0.26417	0.45884	0.996647	6806	3	0.066035
FBgn0033139	6	0.0083688	0.032812	0.994442	473	5	-0.47338	0.92761	0.92742	0.999611	14467	0	-0.47338
FBgn0260439	6	0.0083688	0.032812	0.994442	474	5	-0.44257	0.929	0.92882	0.999611	14491	0	-0.44257
FBgn0062440	6	0.0083732	0.032828	0.994442	475	2	0.53405	0.019817	0.066926	0.990489	962	4	0.53405
FBgn0265912	3	0.0084044	0.022846	0.994442	476	3	-0.92602	0.9916	0.99172	0.999874	15498	0	-0.92602
FBgn0034242	6	0.0084142	0.032973	0.994442	477	4	-0.51195	0.14482	0.29916	0.995008	4441	2	-0.51195
FBgn0039321	6	0.0084207	0.032996	0.994442	478	3	-0.77163	0.5871	0.72221	0.996911	10850	2	-0.77163
FBgn0051072	4	0.0084591	0.028494	0.994442	479	2	-0.64103	0.90623	0.90589	0.999611	14133	0	-0.64103
FBgn0051174	6	0.0085355	0.033413	0.994442	480	5	-0.47804	0.38725	0.56053	0.996647	8482	1	-0.47804
FBgn0036566	6	0.0086153	0.033678	0.994442	481	2	0.15737	0.064195	0.17099	0.995008	2491	3	0.15737
FBgn0265138	6	0.0086233	0.033708	0.994442	482	4	-0.37005	0.45341	0.61227	0.996647	9238	2	-0.37005
FBgn0030961	6	0.0086331	0.033737	0.994442	483	1	0.12027	0.14365	0.29753	0.995008	4416	2	0.12027
FBgn0265191	4	0.008648	0.029107	0.994442	484	2	0.03177	0.27799	0.40955	0.995594	7058	2	0.03177
FBgn0036833	6	0.0087016	0.033969	0.994442	485	3	-0.28667	0.43264	0.596	0.996647	8978	2	-0.28667
FBgn0036947	6	0.0087371	0.034101	0.994442	486	5	-0.38716	0.97714	0.97722	0.999611	15252	0	-0.38716
FBgn0260011	6	0.0087436	0.034123	0.994442	487	3	-0.20196	0.11446	0.25659	0.995008	3758	2	-0.20196
FBgn0004623	6	0.0087747	0.03423	0.994442	488	4	-0.45282	0.364	0.54277	0.996647	8195	2	-0.45282
FBgn0263449	4	0.0087808	0.029544	0.994442	489	3	-0.71233	0.74408	0.74528	0.999611	12172	1	-0.71233
FBgn0027066	8	0.0087851	0.037856	0.994442	490	4	-0.2396	0.97131	0.97148	0.999611	15174	0	-0.2396
FBgn0037942	6	0.0088345	0.034451	0.994442	491	4	-0.47633	0.70774	0.77818	0.999611	11851	1	-0.47633
FBgn0000382	8	0.0088352	0.038043	0.994442	492	5	-0.43121	0.85708	0.89473	0.999611	13431	1	-0.43121
FBgn0085377	6	0.0088356	0.034451	0.994442	493	3	-0.27283	0.69841	0.77431	0.999611	11769	1	-0.27283
FBgn0264720	4	0.0088369	0.029721	0.994442	494	1	-0.077964	0.50192	0.57893	0.996647	9799	1	-0.077964
FBgn0029121	6	0.0088455	0.034484	0.994442	495	3	-0.16418	0.57037	0.7079	0.99676	10617	2	-0.16418
FBgn0031948	6	0.008889	0.034637	0.994442	496	3	-0.32703	0.60459	0.73748	0.999611	11047	1	-0.32703
FBgn0034724	6	0.0089163	0.034729	0.994442	497	4	-0.38944	0.20179	0.37717	0.995008	5607	2	-0.38944
FBgn0003053	6	0.0089533	0.034857	0.994442	498	4	-0.74797	0.44905	0.60881	0.996647	9180	1	-0.74797
FBgn0263768	4	0.0090338	0.03021	0.994442	499	3	-0.73801	0.93457	0.93425	0.999611	14580	0	-0.73801
FBgn0050277	6	0.0090871	0.035319	0.994442	500	5	-0.55721	0.54929	0.69023	0.996647	10374	1	-0.55721
FBgn0040900	6	0.009098	0.035363	0.994442	501	3	-0.20641	0.019907	0.067146	0.990489	964	3	-0.20641
FBgn0052815	4	0.0091126	0.030385	0.994442	502	3	-0.54284	0.98596	0.98595	0.999763	15409	0	-0.54284
FBgn0264381	4	0.0091324	0.030436	0.994442	503	2	-0.36249	0.93508	0.93477	0.999611	14587	0	-0.36249
FBgn0267636	4	0.0091355	0.030441	0.994442	504	3	-0.52083	0.73011	0.73295	0.999526	12032	1	-0.52083
FBgn0053310	6	0.0091419	0.035524	0.994442	505	3	-0.22208	0.031907	0.096707	0.990489	1434	1	-0.22208
FBgn0032734	6	0.0091419	0.035524	0.994442	506	2	-0.298	0.59499	0.72902	0.998541	10947	2	-0.298
FBgn0036790	6	0.009164	0.035598	0.994442	507	1	0.4082	0.010213	0.039287	0.98853	576	5	0.4082
FBgn0267690	6	0.0091762	0.035636	0.994442	508	4	-0.54487	0.7635	0.80405	0.999611	12372	1	-0.54487
FBgn0033636	10	0.0091823	0.043069	0.994442	509	2	0.28599	0.031804	0.11704	0.995008	1429	6	0.28599
FBgn0004783	6	0.0092242	0.035804	0.994442	510	3	-0.1296	0.14322	0.29694	0.995008	4397	3	-0.1296
FBgn0267786	4	0.0092275	0.030649	0.994442	511	2	-0.67468	0.70091	0.70852	0.996911	11792	1	-0.67468
FBgn0053985	6	0.0092412	0.035872	0.994442	512	4	-0.41491	0.79974	0.82375	0.999611	12731	1	-0.41491
FBgn0266031	4	0.0092619	0.030737	0.994442	513	2	-0.19376	0.50908	0.58278	0.996647	9886	1	-0.19376
FBgn0037167	6	0.0092709	0.035973	0.994442	514	5	-0.73793	0.9991	0.99911	0.999874	15611	0	-0.73793
FBgn0039498	6	0.0093106	0.036106	0.994442	515	3	-0.21688	0.44121	0.60267	0.996647	9084	2	-0.21688
FBgn0264479	4	0.0094288	0.031128	0.994442	516	3	-1.5285	0.93121	0.93082	0.999611	14527	0	-1.5285
FBgn0030836	6	0.0094398	0.036538	0.994442	517	2	0.1233	0.26356	0.45804	0.996647	6793	3	0.1233
FBgn0051729	10	0.0094776	0.044298	0.994442	518	5	-0.44209	0.77645	0.88236	0.999611	12488	2	-0.44209
FBgn0267791	8	0.0094783	0.040527	0.994442	519	2	-0.0065717	0.12927	0.30414	0.995008	4090	3	-0.0065717
FBgn0266674	3	0.0094813	0.025633	0.994442	520	3	-0.75132	0.99052	0.99064	0.999763	15469	0	-0.75132
FBgn0016920	6	0.0094824	0.03669	0.994442	521	1	0.22869	0.16423	0.32608	0.995008	4857	2	0.22869
FBgn0004569	6	0.0094975	0.036732	0.994442	522	5	-0.65743	0.9728	0.97289	0.999611	15196	0	-0.65743
FBgn0265087	4	0.0095261	0.031358	0.994442	523	2	-0.31914	0.94271	0.94247	0.999611	14699	0	-0.31914
FBgn0032597	4	0.0096281	0.031582	0.994442	524	3	-0.59402	0.37923	0.51762	0.996647	8368	1	-0.59402
FBgn0029987	6	0.0096363	0.037232	0.994442	525	4	-0.6132	0.098917	0.23411	0.995008	3447	1	-0.6132
FBgn0051204	5	0.0096698	0.032949	0.994442	526	4	-1.6773	0.32707	0.47969	0.996647	7735	1	-1.6773
FBgn0025393	6	0.0096914	0.03743	0.994442	527	3	-0.54592	0.75576	0.80015	0.999611	12294	1	-0.54592
FBgn0032086	6	0.0096946	0.037443	0.994442	528	4	-0.76331	0.55577	0.69562	0.996647	10463	2	-0.76331
FBgn0036520	6	0.0097237	0.037543	0.994442	529	3	-0.55324	0.39176	0.56409	0.996647	8538	2	-0.55324
FBgn0259173	6	0.0097237	0.037543	0.994442	530	3	-0.61127	0.38665	0.56008	0.996647	8470	1	-0.61127
FBgn0046689	6	0.0097653	0.037695	0.994442	531	4	-0.63807	0.59038	0.725	0.996911	10896	2	-0.63807
FBgn0030763	6	0.0097718	0.037726	0.994442	532	2	-0.043569	0.38688	0.56026	0.996647	8473	2	-0.043569
FBgn0267957	4	0.0097811	0.031947	0.994442	533	3	-0.77781	0.12758	0.2413	0.995008	4056	1	-0.77781
FBgn0029963	6	0.0097923	0.037796	0.994442	534	4	-0.75037	0.99026	0.9903	0.999763	15465	0	-0.75037
FBgn0037012	6	0.0097923	0.037796	0.994442	535	4	-0.58472	0.65487	0.75734	0.999611	11427	1	-0.58472
FBgn0264678	6	0.0098184	0.037881	0.994442	536	3	-0.20427	0.338	0.52308	0.996647	7869	2	-0.20427
FBgn0040291	6	0.009846	0.037972	0.994442	537	4	-0.50511	0.99665	0.99662	0.999874	15564	0	-0.50511
FBgn0034666	6	0.0098515	0.03799	0.994442	538	4	-0.32684	0.17108	0.33538	0.995008	4972	1	-0.32684
FBgn0038946	6	0.0098612	0.038027	0.994442	539	3	-0.16825	0.24225	0.43051	0.996647	6394	2	-0.16825
FBgn0033339	6	0.0098961	0.038148	0.994442	540	4	-0.40305	0.92727	0.92707	0.999611	14460	0	-0.40305
FBgn0032415	6	0.0098961	0.038148	0.994442	541	4	-0.36348	0.92276	0.92253	0.999611	14382	0	-0.36348
FBgn0035203	6	0.0099036	0.038173	0.994442	542	4	-0.29518	0.96067	0.96072	0.999611	14993	0	-0.29518
FBgn0032100	6	0.009922	0.038235	0.994442	543	5	-0.50713	0.99731	0.99727	0.999874	15574	0	-0.50713
FBgn0033497	6	0.0099333	0.038274	0.994442	544	3	-0.7411	0.35427	0.5353	0.996647	8084	1	-0.7411
FBgn0030990	6	0.0099775	0.038432	0.994442	545	4	-0.43068	0.97692	0.97698	0.999611	15249	0	-0.43068
FBgn0014851	6	0.0099843	0.03846	0.994442	546	4	-0.37393	0.86649	0.86944	0.999611	13554	1	-0.37393
FBgn0264862	2	0.01006	0.018905	0.989383	547	2	-1.7758	0.98994	0.98978	0.999763	15460	0	-1.7758
FBgn0035238	6	0.010072	0.038772	0.994442	548	4	-0.44992	0.94643	0.94624	0.999611	14763	0	-0.44992
FBgn0032801	6	0.010072	0.038772	0.994442	549	5	-0.95161	0.48972	0.6412	0.996647	9651	1	-0.95161
FBgn0013767	6	0.010122	0.038954	0.994442	550	5	-0.7116	0.97634	0.9764	0.999611	15238	0	-0.7116
FBgn0033463	6	0.010131	0.038981	0.994442	551	3	-0.13771	0.57037	0.7079	0.99676	10621	2	-0.13771
FBgn0264830	6	0.010184	0.039179	0.994442	552	4	-0.55153	0.45845	0.61623	0.996647	9293	1	-0.55153
FBgn0037645	6	0.01019	0.039198	0.994442	553	1	-0.00074547	0.95333	0.95325	0.999611	14875	0	-0.00074547
FBgn0036941	6	0.010208	0.039258	0.994442	554	4	-0.28657	0.91702	0.91667	0.999611	14280	0	-0.28657
FBgn0035679	4	0.010263	0.033001	0.994442	555	3	-0.54597	0.95507	0.95483	0.999611	14898	0	-0.54597
FBgn0037835	6	0.010277	0.039478	0.994442	556	5	-0.49443	0.87114	0.8732	0.999611	13609	1	-0.49443
FBgn0034959	6	0.010287	0.039515	0.994442	557	3	-0.32478	0.98153	0.98155	0.999611	15333	0	-0.32478
FBgn0031374	9	0.010288	0.044732	0.994442	558	5	-0.38396	0.99895	0.99897	0.999874	15608	0	-0.38396
FBgn0031494	6	0.010329	0.039681	0.994442	559	4	-0.71171	0.41578	0.58265	0.996647	8810	2	-0.71171
FBgn0032482	4	0.010347	0.033184	0.994442	560	1	0.04519	0.67312	0.68707	0.996647	11560	1	0.04519
FBgn0266464	6	0.010386	0.039891	0.994442	561	4	-0.50981	0.61634	0.74361	0.999611	11146	1	-0.50981
FBgn0262686	6	0.010402	0.039938	0.994442	562	2	-0.21432	0.13039	0.27917	0.995008	4116	2	-0.21432
FBgn0265575	7	0.010407	0.040877	0.994442	563	5	-0.9996	0.54675	0.7025	0.99676	10346	1	-0.9996
FBgn0036837	12	0.010419	0.051512	0.994442	564	3	0.049972	0.049637	0.17838	0.995008	2022	5	0.049972
FBgn0030241	6	0.010478	0.040223	0.994442	565	3	-0.14732	0.1943	0.367	0.995008	5445	3	-0.14732
FBgn0085230	6	0.010543	0.04044	0.994442	566	3	-0.17624	0.13039	0.27917	0.995008	4115	1	-0.17624
FBgn0003748	14	0.010547	0.054624	0.994442	567	6	-0.25752	0.50603	0.77236	0.999611	9851	4	-0.25752
FBgn0003507	4	0.010576	0.033673	0.994442	568	2	-0.37111	0.2632	0.3931	0.995008	6787	1	-0.37111
FBgn0052603	6	0.010614	0.040688	0.994442	569	3	-0.33536	0.87596	0.87725	0.999611	13677	1	-0.33536
FBgn0013681	2	0.010657	0.020027	0.992993	570	2	-0.68002	0.98934	0.9892	0.999763	15452	0	-0.68002
FBgn0036808	6	0.010663	0.040875	0.994442	571	3	-0.0055977	0.11368	0.25545	0.995008	3737	3	-0.0055977
FBgn0040066	6	0.010678	0.040946	0.994442	572	4	-0.42643	0.45639	0.61463	0.996647	9276	1	-0.42643
FBgn0037027	6	0.010697	0.04101	0.994442	573	2	-0.12567	0.38838	0.56144	0.996647	8491	1	-0.12567
FBgn0265632	6	0.01071	0.041064	0.994442	574	4	-0.64323	0.40525	0.57454	0.996647	8693	2	-0.64323
FBgn0031106	4	0.01072	0.034008	0.994442	575	3	-0.74286	0.97248	0.97224	0.999611	15191	0	-0.74286
FBgn0053667	6	0.010755	0.041228	0.994442	576	3	-0.40971	0.77457	0.80969	0.999611	12466	1	-0.40971
FBgn0031773	6	0.010771	0.041279	0.994442	577	4	-0.48455	0.98116	0.98119	0.999611	15324	0	-0.48455
FBgn0267207	4	0.01079	0.034167	0.994442	578	3	-0.3923	0.79862	0.79814	0.999611	12715	0	-0.3923
FBgn0045064	6	0.010826	0.041477	0.994442	579	2	0.2421	0.13402	0.28426	0.995008	4193	3	0.2421
FBgn0051634	6	0.010834	0.041506	0.994442	580	4	-0.36068	0.56019	0.69931	0.996647	10520	1	-0.36068
FBgn0039654	6	0.010849	0.04156	0.994442	581	3	-0.11381	0.2093	0.38704	0.995008	5754	3	-0.11381
FBgn0004832	4	0.01096	0.034535	0.994442	582	3	-0.51379	0.98198	0.98197	0.999611	15341	0	-0.51379
FBgn0038924	6	0.010961	0.041941	0.994442	583	4	-0.68631	0.42598	0.59068	0.996647	8910	2	-0.68631
FBgn0020633	6	0.010995	0.04206	0.994442	584	4	-0.31087	0.58324	0.7189	0.996911	10798	2	-0.31087
FBgn0030657	4	0.011008	0.034642	0.994442	585	1	0.36383	0.022695	0.061226	0.990489	1078	2	0.36383
FBgn0034906	6	0.011013	0.04213	0.994442	586	3	-0.69033	0.50903	0.65687	0.996647	9885	2	-0.69033
FBgn0038460	8	0.011024	0.046409	0.994442	587	5	-0.34442	0.96199	0.96215	0.999611	15014	0	-0.34442
FBgn0032797	6	0.011038	0.042217	0.994442	588	2	-0.22224	0.51357	0.66057	0.996647	9934	1	-0.22224
FBgn0051119	6	0.011057	0.04228	0.994442	589	3	-0.34666	0.40036	0.57071	0.996647	8627	2	-0.34666
FBgn0283501	4	0.011084	0.034825	0.994442	590	3	-0.50719	0.1056	0.21671	0.995008	3584	1	-0.50719
FBgn0003388	6	0.011118	0.042512	0.994442	591	4	-0.6714	0.92575	0.92561	0.999611	14444	0	-0.6714
FBgn0036105	6	0.011118	0.042512	0.994442	592	3	-0.45094	0.025539	0.081179	0.990489	1189	2	-0.45094
FBgn0042111	4	0.011149	0.034982	0.994442	593	3	-0.42634	0.69946	0.70739	0.99676	11777	1	-0.42634
FBgn0024921	4	0.01118	0.035052	0.994442	594	3	-0.92745	0.97872	0.97867	0.999611	15278	0	-0.92745
FBgn0029937	6	0.011233	0.042927	0.994442	595	4	-0.83918	0.85912	0.8635	0.999611	13455	1	-0.83918
FBgn0033588	6	0.011233	0.042927	0.994442	596	3	-0.34921	0.59266	0.72701	0.997369	10924	1	-0.34921
FBgn0013531	6	0.011286	0.043107	0.994442	597	4	-0.47739	0.88057	0.8813	0.999611	13750	1	-0.47739
FBgn0265681	4	0.01129	0.035306	0.994442	598	1	-0.2655	0.95091	0.95073	0.999611	14838	0	-0.2655
FBgn0032122	6	0.01132	0.043223	0.994442	599	3	-0.22359	0.89538	0.8952	0.999611	13965	1	-0.22359
FBgn0033699	6	0.011328	0.043255	0.994442	600	4	-0.57936	0.21864	0.39946	0.995008	5948	1	-0.57936
FBgn0035824	5	0.011349	0.037887	0.994442	601	3	-0.33763	0.98536	0.98545	0.999716	15405	0	-0.33763
FBgn0040239	6	0.011391	0.04349	0.994442	602	1	-0.0083953	0.20607	0.38281	0.995008	5695	2	-0.0083953
FBgn0040377	5	0.0114	0.038028	0.994442	603	4	-0.59929	0.77291	0.7848	0.999611	12448	1	-0.59929
FBgn0034428	6	0.011409	0.043551	0.994442	604	4	-0.4611	0.65897	0.75889	0.999611	11464	1	-0.4611
FBgn0004888	6	0.011537	0.043975	0.994442	605	4	-1.6034	0.77424	0.80953	0.999611	12460	1	-1.6034
FBgn0263987	6	0.01168	0.044489	0.994442	606	3	-0.41887	0.87789	0.87894	0.999611	13710	1	-0.41887
FBgn0023542	6	0.011699	0.044537	0.994442	607	4	-0.60329	0.94402	0.94385	0.999611	14730	0	-0.60329
FBgn0030707	6	0.011705	0.044558	0.994442	608	3	-0.31134	0.57749	0.71399	0.996911	10722	2	-0.31134
FBgn0266492	3	0.01172	0.031266	0.994442	609	2	-0.54106	0.87973	0.87967	0.999611	13737	0	-0.54106
FBgn0262738	6	0.011759	0.044749	0.994442	610	4	-0.6294	0.74653	0.79563	0.999611	12196	1	-0.6294
FBgn0264562	6	0.011815	0.044936	0.994442	611	4	-0.52706	0.45145	0.61072	0.996647	9214	2	-0.52706
FBgn0260874	7	0.01182	0.045415	0.994442	612	4	-0.31695	0.0065221	0.028252	0.980433	371	3	-0.31695
FBgn0263607	6	0.011943	0.04539	0.994442	613	2	0.45044	0.0099577	0.038375	0.981486	566	4	0.45044
FBgn0038054	6	0.011946	0.045397	0.994442	614	3	-0.55317	0.24739	0.43719	0.996647	6476	1	-0.55317
FBgn0011701	6	0.011991	0.045555	0.994442	615	4	-1.0183	0.67033	0.76319	0.999611	11545	1	-1.0183
FBgn0267066	4	0.011997	0.036842	0.994442	616	2	-0.31088	0.48767	0.57128	0.996647	9617	1	-0.31088
FBgn0267211	4	0.012057	0.036971	0.994442	617	3	-0.58285	0.77754	0.77689	0.999611	12502	1	-0.58285
FBgn0052085	6	0.012097	0.045917	0.994442	618	3	-0.22583	0.69286	0.7721	0.999611	11732	1	-0.22583
FBgn0028980	6	0.012172	0.046182	0.994442	619	4	-0.52558	0.024875	0.079535	0.990489	1163	2	-0.52558
FBgn0085213	6	0.012172	0.046182	0.994442	620	4	-0.99126	0.44098	0.60249	0.996647	9082	1	-0.99126
FBgn0267927	4	0.012186	0.037252	0.994442	621	2	-0.05369	0.6374	0.66143	0.996647	11297	1	-0.05369
FBgn0036734	6	0.012203	0.046282	0.994442	622	1	0.20938	0.037429	0.10985	0.995008	1622	3	0.20938
FBgn0000276	6	0.012203	0.046282	0.994442	623	1	-0.1015	0.22397	0.40639	0.995008	6043	2	-0.1015
FBgn0025625	6	0.012211	0.046302	0.994442	624	3	-0.34753	0.67643	0.76559	0.999611	11587	1	-0.34753
FBgn0264472	6	0.01226	0.046438	0.994442	625	3	-0.24645	0.52397	0.66902	0.996647	10067	2	-0.24645
FBgn0001319	9	0.012307	0.051856	0.994442	626	5	-0.49127	0.11287	0.29568	0.995008	3718	2	-0.49127
FBgn0036670	6	0.012379	0.046749	0.994442	627	3	-0.30851	0.99548	0.99553	0.999874	15549	0	-0.30851
FBgn0050499	6	0.012414	0.046842	0.994442	628	3	-0.27608	0.5793	0.71554	0.996911	10745	2	-0.27608
FBgn0266347	6	0.012449	0.046936	0.994442	629	4	-0.68425	0.098165	0.23302	0.995008	3434	2	-0.68425
FBgn0037387	6	0.01245	0.04694	0.994442	630	3	-0.12362	0.15198	0.30914	0.995008	4582	2	-0.12362
FBgn0266909	4	0.012453	0.037865	0.994442	631	3	-0.51054	0.86851	0.86808	0.999611	13583	0	-0.51054
FBgn0034307	6	0.012461	0.04697	0.994442	632	3	-0.21961	0.14054	0.29331	0.995008	4351	2	-0.21961
FBgn0037222	6	0.012492	0.047062	0.994442	633	4	-0.30552	0.92276	0.92253	0.999611	14380	0	-0.30552
FBgn0030122	4	0.012496	0.037958	0.994442	634	2	-0.29502	0.50175	0.57883	0.996647	9792	1	-0.29502
FBgn0004620	6	0.012516	0.047121	0.994442	635	3	-0.31183	0.83084	0.8432	0.999611	13106	1	-0.31183
FBgn0029712	6	0.012521	0.047134	0.994442	636	1	0.13067	0.53998	0.68237	0.996647	10263	2	0.13067
FBgn0264983	4	0.012563	0.038102	0.994442	637	2	-1.3809	0.86919	0.86877	0.999611	13587	0	-1.3809
FBgn0032017	6	0.012591	0.047325	0.994442	638	2	0.40312	0.027395	0.085743	0.990489	1258	4	0.40312
FBgn0038092	6	0.012608	0.047374	0.994442	639	4	-0.6001	0.90202	0.90178	0.999611	14058	0	-0.6001
FBgn0051612	6	0.012608	0.047374	0.994442	640	4	-0.53814	0.83343	0.84493	0.999611	13139	1	-0.53814
FBgn0260400	7	0.012626	0.048028	0.994442	641	4	-0.56585	0.86209	0.87897	0.999611	13493	1	-0.56585
FBgn0039190	4	0.012657	0.03833	0.994442	642	1	0.046637	0.2824	0.41443	0.995916	7121	1	0.046637
FBgn0267692	4	0.012845	0.038752	0.994442	643	1	0.17484	0.32038	0.45675	0.996647	7650	2	0.17484
FBgn0030114	6	0.01285	0.047998	0.994442	644	2	0.049097	0.21443	0.39383	0.995008	5849	3	0.049097
FBgn0054027	6	0.012873	0.048065	0.994442	645	1	0.19277	0.135	0.28565	0.995008	4222	3	0.19277
FBgn0000078	2	0.012878	0.024205	0.994442	646	2	-0.71572	0.97459	0.97452	0.999611	15219	0	-0.71572
FBgn0024944	6	0.012933	0.048229	0.994442	647	4	-0.70586	0.24663	0.43622	0.996647	6468	2	-0.70586
FBgn0031659	6	0.012933	0.048229	0.994442	648	4	-0.41656	0.80707	0.82805	0.999611	12815	1	-0.41656
FBgn0029856	6	0.012933	0.048229	0.994442	649	4	-0.54283	0.32892	0.51623	0.996647	7758	1	-0.54283
FBgn0027619	6	0.012951	0.048278	0.994442	650	2	0.11564	0.83805	0.84817	0.999611	13198	1	0.11564
FBgn0265705	4	0.012986	0.039091	0.994442	651	2	-0.28573	0.43602	0.54475	0.996647	9019	1	-0.28573
FBgn0266407	4	0.013033	0.039195	0.994442	652	3	-0.38261	0.47246	0.56332	0.996647	9445	1	-0.38261
FBgn0040682	5	0.013094	0.042981	0.994442	653	2	0.041192	0.32668	0.47931	0.996647	7729	2	0.041192
FBgn0034221	5	0.0131	0.042996	0.994442	654	3	-0.41525	0.90882	0.9091	0.999611	14168	0	-0.41525
FBgn0037688	6	0.013156	0.048813	0.994442	655	3	-0.22805	0.92695	0.92676	0.999611	14455	0	-0.22805
FBgn0038218	6	0.013193	0.048917	0.994442	656	2	0.19422	0.22471	0.40736	0.995008	6063	2	0.19422
FBgn0265744	4	0.013213	0.039599	0.994442	657	3	-0.50935	0.90114	0.90073	0.999611	14050	0	-0.50935
FBgn0025697	6	0.01329	0.049161	0.994442	658	3	-0.37032	0.48265	0.63551	0.996647	9566	2	-0.37032
FBgn0000659	5	0.013294	0.043577	0.994442	659	3	-0.49095	0.98491	0.98501	0.999611	15398	0	-0.49095
FBgn0054045	6	0.013312	0.04922	0.994442	660	4	-0.68624	0.08672	0.21625	0.995008	3141	2	-0.68624
FBgn0035886	6	0.01336	0.049351	0.994442	661	3	-0.12304	0.16904	0.3326	0.995008	4935	3	-0.12304
FBgn0041111	10	0.013367	0.05924	0.994442	662	4	-0.066401	0.27326	0.52179	0.996647	6976	3	-0.066401
FBgn0030141	6	0.013367	0.04937	0.994442	663	4	-0.17253	0.95038	0.95025	0.999611	14828	0	-0.17253
FBgn0034132	6	0.013393	0.049446	0.994442	664	4	-0.37077	0.47258	0.62746	0.996647	9448	2	-0.37077
FBgn0264952	4	0.013397	0.04001	0.994442	665	3	-0.94737	0.67553	0.6888	0.996647	11580	1	-0.94737
FBgn0036116	8	0.013422	0.05494	0.994442	666	3	-0.37149	0.43249	0.64804	0.996647	8975	2	-0.37149
FBgn0033680	6	0.013429	0.049543	0.994442	667	3	-0.20296	0.2265	0.40973	0.995594	6096	2	-0.20296
FBgn0004066	6	0.013438	0.049564	0.994442	668	3	-0.22096	0.32645	0.51433	0.996647	7726	2	-0.22096
FBgn0052483	1	0.013448	0.013336	0.989383	669	1	-0.54652	0.98655	0.98663	0.999763	15417	0	-0.54652
FBgn0024807	6	0.013482	0.049669	0.994442	670	3	-0.6732	0.51266	0.65983	0.996647	9923	2	-0.6732
FBgn0051855	6	0.013575	0.04993	0.994442	671	3	-0.17608	0.036121	0.10682	0.994904	1576	3	-0.17608
FBgn0029891	6	0.013619	0.050048	0.994442	672	3	-0.17686	0.84127	0.85039	0.999611	13238	1	-0.17686
FBgn0261928	6	0.013649	0.050124	0.994442	673	3	-0.1436	0.46288	0.61981	0.996647	9336	1	-0.1436
FBgn0263929	7	0.013681	0.051384	0.994442	674	4	-0.67743	0.6594	0.7837	0.999611	11471	1	-0.67743
FBgn0038123	6	0.01371	0.050286	0.994442	675	4	-0.48509	0.090703	0.22208	0.995008	3242	2	-0.48509
FBgn0031209	6	0.01372	0.050314	0.994442	676	4	-0.56381	0.38072	0.55553	0.996647	8398	1	-0.56381
FBgn0038168	4	0.013738	0.040764	0.994442	677	2	-0.55637	0.86181	0.8615	0.999611	13485	0	-0.55637
FBgn0034467	6	0.013743	0.050368	0.994442	678	4	-0.43667	0.93238	0.93221	0.999611	14541	0	-0.43667
FBgn0037591	6	0.013782	0.050476	0.994442	679	3	-0.47994	0.96575	0.96583	0.999611	15081	0	-0.47994
FBgn0030441	6	0.01379	0.050497	0.994442	680	4	-0.275	0.32232	0.51121	0.996647	7677	1	-0.275
FBgn0028427	6	0.013828	0.050594	0.994442	681	4	-0.38854	0.76902	0.80684	0.999611	12411	1	-0.38854
FBgn0005616	6	0.013885	0.050737	0.994442	682	4	-0.5566	0.41126	0.57918	0.996647	8759	1	-0.5566
FBgn0035707	4	0.013927	0.041205	0.994442	683	1	0.019666	0.43472	0.54411	0.996647	8999	1	0.019666
FBgn0262719	6	0.013932	0.050847	0.994442	684	3	-0.077487	0.26849	0.46441	0.996647	6875	2	-0.077487
FBgn0053474	6	0.013947	0.05089	0.994442	685	2	-0.12846	0.30019	0.49474	0.996647	7355	1	-0.12846
FBgn0263617	6	0.013947	0.05089	0.994442	686	3	-0.39939	0.39765	0.56866	0.996647	8602	1	-0.39939
FBgn0038897	6	0.013966	0.050943	0.994442	687	3	-0.41593	0.45421	0.61292	0.996647	9245	2	-0.41593
FBgn0265062	4	0.013975	0.041308	0.994442	688	1	0.33844	0.0087517	0.029445	0.980433	490	2	0.33844
FBgn0267243	4	0.013976	0.041312	0.994442	689	3	-0.53479	0.50506	0.58062	0.996647	9833	1	-0.53479
FBgn0032449	6	0.013997	0.05103	0.994442	690	3	-0.2461	0.73783	0.79158	0.999611	12098	1	-0.2461
FBgn0041342	11	0.014001	0.062182	0.994442	691	7	-0.26871	0.039286	0.1422	0.995008	1693	4	-0.26871
FBgn0083990	4	0.014035	0.041447	0.994442	692	2	-0.29414	0.84499	0.84448	0.999611	13279	0	-0.29414
FBgn0261065	4	0.014048	0.04148	0.994442	693	2	-0.16573	0.73031	0.73314	0.999526	12036	1	-0.16573
FBgn0085337	6	0.014091	0.051273	0.994442	694	3	-0.42035	0.5945	0.72858	0.998199	10942	1	-0.42035
FBgn0261638	4	0.014098	0.041597	0.994442	695	3	-0.57294	0.73031	0.73314	0.999526	12035	1	-0.57294
FBgn0037920	6	0.014182	0.051499	0.994442	696	2	0.10595	0.10579	0.244	0.995008	3587	1	0.10595
FBgn0030512	6	0.014207	0.051568	0.994442	697	4	-0.50779	0.19732	0.37111	0.995008	5500	1	-0.50779
FBgn0028381	6	0.014213	0.051583	0.994442	698	2	-0.022766	0.23935	0.42666	0.996647	6343	3	-0.022766
FBgn0030067	6	0.014232	0.051632	0.994442	699	3	0.1015	0.15547	0.314	0.995008	4658	3	0.1015
FBgn0035623	5	0.014232	0.046323	0.994442	700	3	-0.91404	0.95791	0.95807	0.999611	14950	0	-0.91404
FBgn0024189	6	0.014267	0.05173	0.994442	701	4	-0.59955	0.97453	0.97456	0.999611	15218	0	-0.59955
FBgn0260750	6	0.014283	0.051777	0.994442	702	2	-0.29504	0.87342	0.87514	0.999611	13635	1	-0.29504
FBgn0261244	6	0.014354	0.051953	0.994442	703	3	-0.40747	0.58989	0.72457	0.996911	10889	2	-0.40747
FBgn0050431	6	0.014373	0.051993	0.994442	704	4	-0.39774	0.97351	0.97358	0.999611	15206	0	-0.39774
FBgn0264950	4	0.014398	0.042291	0.994442	705	2	-0.32248	0.13918	0.25456	0.995008	4315	1	-0.32248
FBgn0002940	6	0.014424	0.052147	0.994442	706	3	-0.53137	0.89237	0.89227	0.999611	13921	1	-0.53137
FBgn0039250	6	0.014472	0.052268	0.994442	707	3	-0.26444	0.96228	0.96235	0.999611	15019	0	-0.26444
FBgn0033538	6	0.014495	0.052327	0.994442	708	2	-0.064659	0.25607	0.44844	0.996647	6652	1	-0.064659
FBgn0038890	6	0.014495	0.052327	0.994442	709	3	-0.80437	0.30452	0.49795	0.996647	7422	2	-0.80437
FBgn0265865	4	0.014499	0.042545	0.994442	710	3	-0.48169	0.98527	0.98526	0.999611	15403	0	-0.48169
FBgn0262057	5	0.014502	0.047093	0.994442	711	2	0.056307	0.45523	0.60065	0.996647	9259	1	0.056307
FBgn0028913	5	0.014561	0.047259	0.994442	712	4	-0.36986	0.59857	0.68524	0.996647	10991	1	-0.36986
FBgn0039760	6	0.014603	0.052605	0.994442	713	3	-0.40513	0.81863	0.83515	0.999611	12943	1	-0.40513
FBgn0262896	6	0.01465	0.05274	0.994442	714	3	-0.39492	0.27517	0.47307	0.996647	7010	1	-0.39492
FBgn0038224	4	0.01466	0.042901	0.994442	715	3	-0.38192	0.25106	0.37947	0.995008	6558	1	-0.38192
FBgn0037662	6	0.014688	0.052831	0.994442	716	4	-0.41406	0.8752	0.87664	0.999611	13658	1	-0.41406
FBgn0263237	4	0.014695	0.042968	0.994442	717	3	-0.95731	0.99067	0.99071	0.999763	15478	0	-0.95731
FBgn0265044	6	0.014759	0.053022	0.994442	718	3	-0.30099	0.60142	0.73474	0.999611	11015	2	-0.30099
FBgn0017572	6	0.014777	0.053066	0.994442	719	2	0.00089175	0.41238	0.58005	0.996647	8776	2	0.00089175
FBgn0039932	8	0.014808	0.059024	0.994442	720	4	-0.25935	0.72543	0.83578	0.999611	11994	2	-0.25935
FBgn0027334	6	0.014822	0.053205	0.994442	721	3	0.097208	0.11845	0.26235	0.995008	3848	3	0.097208
FBgn0035859	6	0.014836	0.053235	0.994442	722	3	-0.15184	0.061474	0.16491	0.995008	2413	1	-0.15184
FBgn0263623	4	0.014837	0.043296	0.994442	723	3	-0.50523	0.88899	0.88847	0.999611	13861	0	-0.50523
FBgn0085460	6	0.014847	0.053277	0.994442	724	2	-0.028995	0.71132	0.77966	0.999611	11883	1	-0.028995
FBgn0034725	6	0.014847	0.053277	0.994442	725	2	-0.20138	0.38767	0.56087	0.996647	8487	2	-0.20138
FBgn0085442	7	0.014852	0.055055	0.994442	726	5	-0.47316	0.60364	0.74226	0.999611	11030	1	-0.47316
FBgn0264075	6	0.014877	0.053357	0.994442	727	3	-0.024407	0.11528	0.25782	0.995008	3777	3	-0.024407
FBgn0038398	6	0.014877	0.053357	0.994442	728	2	-0.017387	0.068184	0.17971	0.995008	2622	2	-0.017387
FBgn0264494	6	0.014899	0.053418	0.994442	729	3	-0.16274	0.24448	0.43344	0.996647	6434	2	-0.16274
FBgn0267254	6	0.01491	0.053443	0.994442	730	4	-0.59669	0.95545	0.9554	0.999611	14908	0	-0.59669
FBgn0267019	4	0.014915	0.043493	0.994442	731	2	-0.38208	0.3194	0.45568	0.996647	7633	1	-0.38208
FBgn0085486	6	0.014929	0.053482	0.994442	732	2	-0.1017	0.44825	0.60815	0.996647	9173	2	-0.1017
FBgn0052944	7	0.014987	0.05547	0.994442	733	4	-0.28794	0.2875	0.4917	0.996647	7188	2	-0.28794
FBgn0283473	6	0.014988	0.053628	0.994442	734	1	0.33067	0.061975	0.16604	0.995008	2426	4	0.33067
FBgn0262518	7	0.014992	0.055488	0.994442	735	3	-0.19908	0.46818	0.65073	0.996647	9399	1	-0.19908
FBgn0036072	6	0.015025	0.0537	0.994442	736	4	-0.49746	0.27691	0.4753	0.996647	7036	2	-0.49746
FBgn0037892	6	0.015025	0.0537	0.994442	737	4	-0.58036	0.96206	0.96212	0.999611	15017	0	-0.58036
FBgn0036469	3	0.015033	0.039458	0.994442	738	2	-1.8401	0.92002	0.9201	0.999611	14329	0	-1.8401
FBgn0039440	6	0.015058	0.053785	0.994442	739	2	0.10776	0.37568	0.55168	0.996647	8337	2	0.10776
FBgn0039644	6	0.015068	0.053814	0.994442	740	3	-0.28888	0.57707	0.71364	0.996911	10716	1	-0.28888
FBgn0261788	9	0.015078	0.061659	0.994442	741	4	-0.013311	0.3685	0.60645	0.996647	8252	3	-0.013311
FBgn0052061	3	0.015139	0.039747	0.994442	742	3	-0.66622	0.98486	0.98501	0.999611	15396	0	-0.66622
FBgn0052105	6	0.015182	0.054098	0.994442	743	4	-0.81813	0.99044	0.99046	0.999763	15468	0	-0.81813
FBgn0264560	6	0.015182	0.054099	0.994442	744	4	-0.41375	0.7889	0.81746	0.999611	12620	1	-0.41375
FBgn0263445	4	0.015197	0.044108	0.994442	745	1	-0.13224	0.69993	0.7078	0.99676	11781	1	-0.13224
FBgn0264960	4	0.015268	0.044261	0.994442	746	2	-0.69622	0.79992	0.79945	0.999611	12734	0	-0.69622
FBgn0034144	6	0.01527	0.054315	0.994442	747	3	-0.20713	0.11935	0.26361	0.995008	3862	1	-0.20713
FBgn0265874	4	0.015304	0.044358	0.994442	748	2	-0.42212	0.42656	0.54008	0.996647	8919	1	-0.42212
FBgn0040651	6	0.01534	0.054474	0.994442	749	1	0.25674	0.057147	0.15521	0.995008	2266	3	0.25674
FBgn0003116	6	0.015403	0.054645	0.994442	750	3	-0.10894	0.091867	0.22374	0.995008	3279	3	-0.10894
FBgn0032387	6	0.01541	0.054659	0.994442	751	2	-0.20352	0.84412	0.85236	0.999611	13270	1	-0.20352
FBgn0010612	4	0.015472	0.044741	0.994442	752	2	-0.17498	0.07668	0.17086	0.995008	2869	1	-0.17498
FBgn0036913	6	0.015551	0.055009	0.994442	753	4	-0.28344	0.78603	0.8159	0.999611	12582	1	-0.28344
FBgn0261881	5	0.015589	0.050168	0.994442	754	4	-0.78177	0.2447	0.40381	0.995008	6440	1	-0.78177
FBgn0264552	6	0.015592	0.055099	0.994442	755	3	-0.48165	0.30452	0.49795	0.996647	7423	2	-0.48165
FBgn0035425	5	0.015647	0.050312	0.994442	756	4	-0.54365	0.2392	0.39881	0.995008	6341	1	-0.54365
FBgn0083986	6	0.015725	0.055432	0.994442	757	4	-0.41159	0.853	0.85878	0.999611	13379	1	-0.41159
FBgn0261862	6	0.015727	0.055438	0.994442	758	3	-0.19907	0.17666	0.34319	0.995008	5091	3	-0.19907
FBgn0031531	5	0.015731	0.050552	0.994442	759	2	0.027442	0.92812	0.92833	0.999611	14476	0	0.027442
FBgn0034939	6	0.015741	0.055479	0.994442	760	3	0.10425	0.0093859	0.036389	0.980433	532	3	0.10425
FBgn0004244	8	0.015753	0.061738	0.994442	761	5	-0.37078	0.55994	0.73592	0.999611	10517	1	-0.37078
FBgn0024732	6	0.015762	0.055542	0.994442	762	2	0.12017	0.8888	0.8888	0.999611	13858	1	0.12017
FBgn0261444	6	0.015763	0.055544	0.994442	763	4	-0.62119	0.99442	0.99443	0.999874	15534	0	-0.62119
FBgn0027579	7	0.015804	0.058038	0.994442	764	4	-0.25551	0.35788	0.56964	0.996647	8137	1	-0.25551
FBgn0030001	4	0.015808	0.045499	0.994442	765	1	0.048177	0.0075612	0.025641	0.980433	431	2	0.048177
FBgn0038388	6	0.015833	0.055706	0.994442	766	2	-0.42504	0.065154	0.17307	0.995008	2527	1	-0.42504
FBgn0032048	6	0.015835	0.05571	0.994442	767	4	-0.3778	0.94943	0.9493	0.999611	14810	0	-0.3778
FBgn0262599	6	0.015835	0.05571	0.994442	768	4	-0.50949	0.94054	0.94045	0.999611	14666	0	-0.50949
FBgn0024184	6	0.015835	0.055711	0.994442	769	2	-0.51503	0.31939	0.50896	0.996647	7630	2	-0.51503
FBgn0263507	4	0.015902	0.045704	0.994442	770	2	-0.63639	0.96493	0.96474	0.999611	15072	0	-0.63639
FBgn0035932	6	0.015903	0.055892	0.994442	771	1	0.38309	0.052668	0.14506	0.995008	2124	3	0.38309
FBgn0002626	4	0.015946	0.04581	0.994442	772	3	-0.25333	0.96763	0.96743	0.999611	15113	0	-0.25333
FBgn0038484	5	0.015949	0.051192	0.994442	773	4	-0.61484	0.84622	0.84659	0.999611	13291	1	-0.61484
FBgn0037707	6	0.015967	0.056053	0.994442	774	4	-0.51304	0.91987	0.91955	0.999611	14326	0	-0.51304
FBgn0052758	6	0.015967	0.056053	0.994442	775	4	-0.53332	0.81243	0.83134	0.999611	12871	1	-0.53332
FBgn0031703	6	0.015973	0.056071	0.994442	776	2	0.35573	0.048961	0.13664	0.995008	1993	4	0.35573
FBgn0036181	6	0.015981	0.05609	0.994442	777	4	-0.49564	0.95038	0.95025	0.999611	14826	0	-0.49564
FBgn0037276	6	0.016031	0.056235	0.994442	778	3	-0.68271	0.59838	0.73201	0.99931	10990	1	-0.68271
FBgn0086917	6	0.016031	0.056235	0.994442	779	2	-0.061928	0.064143	0.17088	0.995008	2488	3	-0.061928
FBgn0032919	6	0.01609	0.056382	0.994442	780	4	-0.535	0.65487	0.75734	0.999611	11428	1	-0.535
FBgn0262574	6	0.016095	0.056396	0.994442	781	4	-0.21841	0.74554	0.79518	0.999611	12188	1	-0.21841
FBgn0000723	6	0.016114	0.05645	0.994442	782	2	-0.1652	0.12478	0.27123	0.995008	3988	3	-0.1652
FBgn0034433	6	0.016124	0.056476	0.994442	783	4	-0.45222	0.99746	0.99741	0.999874	15577	0	-0.45222
FBgn0004611	4	0.016184	0.046362	0.994442	784	2	-0.45275	0.5135	0.58515	0.996647	9933	1	-0.45275
FBgn0034982	2	0.016235	0.030257	0.994442	785	2	-0.61656	0.98377	0.98367	0.999611	15376	0	-0.61656
FBgn0039577	6	0.016255	0.056812	0.994442	786	2	-0.36863	0.92495	0.92478	0.999611	14418	0	-0.36863
FBgn0003499	6	0.016303	0.056933	0.994442	787	4	-0.37331	0.47155	0.62667	0.996647	9441	1	-0.37331
FBgn0035445	6	0.016303	0.056933	0.994442	788	2	-0.059464	0.72715	0.78663	0.999611	12005	1	-0.059464
FBgn0013953	6	0.016303	0.056933	0.994442	789	3	-0.18782	0.27025	0.4667	0.996647	6919	3	-0.18782
FBgn0016054	4	0.016325	0.04669	0.994442	790	2	-0.42775	0.77357	0.77295	0.999611	12455	1	-0.42775
FBgn0028692	6	0.016325	0.05699	0.994442	791	3	-0.14327	0.18163	0.34993	0.995008	5186	3	-0.14327
FBgn0029931	6	0.01636	0.057076	0.994442	792	4	-0.4104	0.42588	0.5906	0.996647	8909	1	-0.4104
FBgn0035348	6	0.016501	0.05745	0.994442	793	4	-0.4716	0.98476	0.98479	0.999611	15391	0	-0.4716
FBgn0029932	6	0.016534	0.05754	0.994442	794	3	-0.23714	0.88665	0.88679	0.999611	13823	1	-0.23714
FBgn0266702	4	0.016564	0.047199	0.994442	795	3	-0.60337	0.74272	0.74406	0.999611	12155	1	-0.60337
FBgn0011573	6	0.016606	0.057748	0.994442	796	2	-0.18415	0.14946	0.30566	0.995008	4528	2	-0.18415
FBgn0010391	6	0.016631	0.057819	0.994442	797	3	-0.081499	0.10839	0.24773	0.995008	3638	2	-0.081499
FBgn0265721	4	0.016653	0.047388	0.994442	798	3	-0.31385	0.95738	0.95721	0.999611	14937	0	-0.31385
FBgn0015765	4	0.016668	0.047417	0.994442	799	3	-0.39277	0.96433	0.96414	0.999611	15060	0	-0.39277
FBgn0026430	4	0.0167	0.047493	0.994442	800	1	0.11028	0.1187	0.23144	0.995008	3854	2	0.11028
FBgn0038744	6	0.016747	0.058108	0.994442	801	3	-0.30944	0.83964	0.84926	0.999611	13223	1	-0.30944
FBgn0027616	6	0.016817	0.058285	0.994442	802	4	-0.96262	0.9599	0.95992	0.999611	14979	0	-0.96262
FBgn0261501	4	0.016841	0.047798	0.994442	803	3	-0.53962	0.922	0.92167	0.999611	14369	0	-0.53962
FBgn0030847	6	0.016845	0.05835	0.994442	804	4	-0.44083	0.72295	0.78478	0.999611	11974	1	-0.44083
FBgn0037254	6	0.016885	0.058449	0.994442	805	3	-0.24585	0.25882	0.45204	0.996647	6706	2	-0.24585
FBgn0041236	6	0.016933	0.058561	0.994442	806	4	-0.38395	0.97528	0.97535	0.999611	15228	0	-0.38395
FBgn0036801	6	0.016958	0.058619	0.994442	807	4	-0.38024	0.91905	0.9187	0.999611	14311	0	-0.38024
FBgn0035831	4	0.017029	0.048215	0.994442	808	1	0.43889	0.048431	0.11487	0.995008	1974	3	0.43889
FBgn0032706	6	0.017044	0.058845	0.994442	809	3	-0.34477	0.096135	0.23005	0.995008	3391	2	-0.34477
FBgn0029646	6	0.017098	0.058977	0.994442	810	2	0.24027	0.0493	0.1374	0.995008	2007	3	0.24027
FBgn0266814	4	0.017162	0.048525	0.994442	811	2	-0.21112	0.8783	0.87788	0.999611	13724	0	-0.21112
FBgn0033539	6	0.017169	0.059153	0.994442	812	2	-0.22042	0.18469	0.35409	0.995008	5244	2	-0.22042
FBgn0033236	6	0.017169	0.059154	0.994442	813	3	-0.55284	0.59775	0.73145	0.99899	10979	1	-0.55284
FBgn0004882	9	0.01719	0.068942	0.994442	814	6	-0.29404	0.82512	0.9047	0.999611	13035	1	-0.29404
FBgn0033048	6	0.017194	0.059218	0.994442	815	4	-0.44139	0.97822	0.97827	0.999611	15267	0	-0.44139
FBgn0031952	2	0.017204	0.031997	0.994442	816	2	-2.2809	0.9828	0.9827	0.999611	15361	0	-2.2809
FBgn0030798	7	0.017226	0.062527	0.994442	817	4	-0.51935	0.99849	0.99851	0.999874	15594	0	-0.51935
FBgn0264260	6	0.017235	0.059333	0.994442	818	2	-0.12043	0.7197	0.78334	0.999611	11948	1	-0.12043
FBgn0040650	6	0.017239	0.059345	0.994442	819	3	-0.22576	0.27577	0.47383	0.996647	7021	2	-0.22576
FBgn0267945	4	0.017263	0.048745	0.994442	820	1	0.3758	0.047733	0.11353	0.995008	1949	3	0.3758
FBgn0028550	6	0.017284	0.059467	0.994442	821	3	-0.22666	0.20548	0.38203	0.995008	5682	1	-0.22666
FBgn0033810	6	0.01734	0.059616	0.994442	822	4	-0.42878	0.099571	0.23505	0.995008	3461	2	-0.42878
FBgn0050416	6	0.01734	0.059616	0.994442	823	4	-0.4026	0.051354	0.14207	0.995008	2073	2	-0.4026
FBgn0267435	6	0.01738	0.059721	0.994442	824	2	0.33682	0.037335	0.10964	0.995008	1618	4	0.33682
FBgn0020279	8	0.017409	0.066582	0.994442	825	3	-0.10407	0.75133	0.85375	0.999611	12253	2	-0.10407
FBgn0000370	6	0.017438	0.059873	0.994442	826	2	-0.22991	0.97864	0.9787	0.999611	15274	0	-0.22991
FBgn0262479	6	0.017472	0.059951	0.994442	827	4	-0.37533	0.41874	0.585	0.996647	8834	2	-0.37533
FBgn0262611	6	0.017485	0.059982	0.994442	828	1	-0.071523	0.14648	0.30149	0.995008	4471	2	-0.071523
FBgn0261403	6	0.017488	0.059991	0.994442	829	3	-0.087955	0.025294	0.080575	0.990489	1183	3	-0.087955
FBgn0034157	6	0.017558	0.060159	0.994442	830	4	-0.54862	0.32266	0.51145	0.996647	7681	1	-0.54862
FBgn0053725	4	0.017564	0.049406	0.994442	831	2	-0.26102	0.23951	0.36676	0.995008	6346	1	-0.26102
FBgn0039767	3	0.017567	0.045734	0.994442	832	3	-0.34099	0.98243	0.98255	0.999611	15349	0	-0.34099
FBgn0038722	2	0.017619	0.032739	0.994442	833	1	-0.051023	0.5105	0.51046	0.996647	9908	1	-0.051023
FBgn0036138	6	0.017661	0.06045	0.994442	834	2	-0.076616	0.92714	0.92695	0.999611	14459	0	-0.076616
FBgn0264261	4	0.017686	0.049666	0.994442	835	1	0.20024	0.13757	0.25272	0.995008	4277	2	0.20024
FBgn0262033	4	0.017707	0.049717	0.994442	836	2	-0.23548	0.58066	0.62438	0.996647	10771	1	-0.23548
FBgn0033115	7	0.01771	0.064007	0.994442	837	4	-0.34845	0.03787	0.12175	0.995008	1642	3	-0.34845
FBgn0050054	6	0.017715	0.060601	0.994442	838	2	0.094691	0.90208	0.90184	0.999611	14059	0	0.094691
FBgn0038007	2	0.017757	0.033	0.994442	839	2	-0.36876	0.98224	0.98217	0.999611	15345	0	-0.36876
FBgn0031247	4	0.017779	0.049878	0.994442	840	1	0.15911	0.0012355	0.0044462	0.980433	82	2	0.15911
FBgn0264836	6	0.017801	0.060834	0.994442	841	1	0.31593	0.063045	0.16834	0.995008	2455	3	0.31593
FBgn0008636	6	0.017843	0.060943	0.994442	842	3	-0.65363	0.75657	0.80053	0.999611	12307	1	-0.65363
FBgn0266238	4	0.017867	0.050085	0.994442	843	3	-0.59606	0.43627	0.54488	0.996647	9023	1	-0.59606
FBgn0037405	6	0.017872	0.061016	0.994442	844	1	0.01768	0.1713	0.33569	0.995008	4976	1	0.01768
FBgn0029945	6	0.018	0.061366	0.994442	845	4	-0.63481	0.5516	0.69212	0.996647	10410	2	-0.63481
FBgn0040336	6	0.018	0.061366	0.994442	846	4	-0.75072	0.15014	0.30656	0.995008	4544	2	-0.75072
FBgn0086604	6	0.018	0.061366	0.994442	847	4	-0.42535	0.44339	0.6043	0.996647	9122	1	-0.42535
FBgn0267586	4	0.018009	0.050404	0.994442	848	3	-0.76135	0.69845	0.70656	0.99676	11770	1	-0.76135
FBgn0261674	6	0.018012	0.061401	0.994442	849	3	-0.19917	0.70748	0.77806	0.999611	11846	1	-0.19917
FBgn0040967	6	0.018014	0.061406	0.994442	850	3	-0.33935	0.89114	0.89108	0.999611	13896	1	-0.33935
FBgn0033313	6	0.018103	0.061626	0.994442	851	3	-0.44801	0.30061	0.49505	0.996647	7360	1	-0.44801
FBgn0032791	4	0.018144	0.050696	0.994442	852	3	-0.87704	0.96509	0.96489	0.999611	15075	0	-0.87704
FBgn0033794	3	0.018149	0.047154	0.994442	853	3	-0.68583	0.98185	0.98196	0.999611	15338	0	-0.68583
FBgn0267218	4	0.018155	0.050717	0.994442	854	2	-0.65298	0.73646	0.73844	0.999611	12092	1	-0.65298
FBgn0013672	3	0.018157	0.04717	0.994442	855	2	-0.77986	0.44255	0.48347	0.996647	9101	1	-0.77986
FBgn0033544	8	0.018192	0.068841	0.994442	856	5	-0.60498	0.61609	0.76748	0.999611	11144	1	-0.60498
FBgn0011596	6	0.018214	0.061932	0.994442	857	3	-0.17401	0.42173	0.58736	0.996647	8865	1	-0.17401
FBgn0032889	11	0.018247	0.077861	0.994442	858	6	-0.24737	0.37597	0.63724	0.996647	8341	4	-0.24737
FBgn0041626	1	0.01825	0.018194	0.989383	859	1	-0.94858	0.98175	0.9819	0.999611	15336	0	-0.94858
FBgn0265736	4	0.018301	0.051048	0.994442	860	3	-0.59726	0.97671	0.97663	0.999611	15245	0	-0.59726
FBgn0053530	6	0.018311	0.062188	0.994442	861	4	-0.40396	0.73796	0.79163	0.999611	12099	1	-0.40396
FBgn0034938	6	0.018311	0.062188	0.994442	862	4	-0.39159	0.99693	0.99691	0.999874	15570	0	-0.39159
FBgn0039936	5	0.018345	0.057954	0.994442	863	3	-0.35648	0.42617	0.57276	0.996647	8916	2	-0.35648
FBgn0054006	4	0.018422	0.051314	0.994442	864	3	-0.68385	0.80549	0.80498	0.999611	12795	0	-0.68385
FBgn0011207	6	0.018423	0.062463	0.994442	865	4	-0.57957	0.90096	0.90075	0.999611	14049	0	-0.57957
FBgn0025739	4	0.018426	0.05132	0.994442	866	3	-0.39951	0.85685	0.85645	0.999611	13426	0	-0.39951
FBgn0259986	6	0.018433	0.062491	0.994442	867	3	-0.49191	0.30434	0.49782	0.996647	7418	2	-0.49191
FBgn0261858	6	0.018437	0.062501	0.994442	868	4	-0.46698	0.4186	0.58487	0.996647	8833	2	-0.46698
FBgn0037051	6	0.018475	0.062601	0.994442	869	3	-0.17759	0.91937	0.91904	0.999611	14316	0	-0.17759
FBgn0011836	6	0.018481	0.062614	0.994442	870	4	-0.73712	0.99399	0.99398	0.999874	15523	0	-0.73712
FBgn0085436	4	0.018483	0.051449	0.994442	871	2	-0.25424	0.67814	0.69081	0.996647	11600	1	-0.25424
FBgn0039503	6	0.018504	0.062681	0.994442	872	3	-0.27684	0.97871	0.97876	0.999611	15276	0	-0.27684
FBgn0036406	6	0.018512	0.062702	0.994442	873	3	-0.12821	0.49251	0.64348	0.996647	9690	1	-0.12821
FBgn0267757	4	0.018518	0.051528	0.994442	874	2	-0.06452	0.088853	0.19373	0.995008	3199	2	-0.06452
FBgn0262140	6	0.018574	0.062859	0.994442	875	3	-0.17841	0.87213	0.87403	0.999611	13618	1	-0.17841
FBgn0036279	6	0.018575	0.062859	0.994442	876	3	-0.13095	0.483	0.6358	0.996647	9569	2	-0.13095
FBgn0086611	6	0.018576	0.062864	0.994442	877	4	-0.39967	0.91171	0.91143	0.999611	14213	0	-0.39967
FBgn0052590	4	0.018582	0.051668	0.994442	878	3	-0.82335	0.52278	0.59041	0.996647	10051	1	-0.82335
FBgn0266828	4	0.018623	0.051752	0.994442	879	2	-0.12637	0.51629	0.58677	0.996647	9962	1	-0.12637
FBgn0040493	2	0.018655	0.034602	0.994442	880	2	-1.2722	0.98134	0.9813	0.999611	15328	0	-1.2722
FBgn0029877	6	0.018676	0.063127	0.994442	881	4	-0.40308	0.047382	0.13304	0.995008	1933	2	-0.40308
FBgn0260858	6	0.018738	0.063292	0.994442	882	3	-0.8536	0.86649	0.86944	0.999611	13555	1	-0.8536
FBgn0266206	4	0.018764	0.052069	0.994442	883	1	0.30413	0.23384	0.36047	0.995008	6236	2	0.30413
FBgn0033738	10	0.01877	0.076654	0.994442	884	4	-0.14098	0.97635	0.97655	0.999611	15241	1	-0.14098
FBgn0035405	4	0.018813	0.052187	0.994442	885	3	-0.43913	0.93905	0.93878	0.999611	14642	0	-0.43913
FBgn0265089	6	0.018844	0.063571	0.994442	886	4	-0.71546	0.9707	0.97083	0.999611	15164	0	-0.71546
FBgn0031296	6	0.018855	0.063604	0.994442	887	3	-0.24663	0.8473	0.85462	0.999611	13304	1	-0.24663
FBgn0265937	4	0.018858	0.052285	0.994442	888	2	0.006208	0.048353	0.1147	0.995008	1970	2	0.006208
FBgn0039488	4	0.018868	0.052306	0.994442	889	3	-0.39956	0.89711	0.89669	0.999611	13990	0	-0.39956
FBgn0029994	6	0.018875	0.063653	0.994442	890	4	-0.61216	0.49835	0.64818	0.996647	9761	1	-0.61216
FBgn0000044	6	0.018904	0.063731	0.994442	891	4	-0.33685	0.19878	0.37307	0.995008	5545	1	-0.33685
FBgn0267725	4	0.018905	0.052382	0.994442	892	1	0.014306	0.017592	0.05006	0.98853	895	1	0.014306
FBgn0038879	6	0.018963	0.063889	0.994442	893	3	-0.17987	0.96464	0.96469	0.999611	15067	0	-0.17987
FBgn0264817	6	0.019059	0.064122	0.994442	894	3	-0.51002	0.82393	0.83859	0.999611	13014	1	-0.51002
FBgn0003527	4	0.019092	0.052844	0.994442	895	1	-0.17035	0.8276	0.82709	0.999611	13064	0	-0.17035
FBgn0033031	6	0.01911	0.064263	0.994442	896	3	-1.0205	0.95647	0.95642	0.999611	14922	0	-1.0205
FBgn0037307	6	0.01911	0.064263	0.994442	897	2	-0.16252	0.32877	0.51612	0.996647	7755	2	-0.16252
FBgn0265920	4	0.019126	0.052913	0.994442	898	2	-0.56452	0.4287	0.54115	0.996647	8941	1	-0.56452
FBgn0261588	6	0.019135	0.064321	0.994442	899	2	0.10424	0.43121	0.59484	0.996647	8960	2	0.10424
FBgn0031683	6	0.019178	0.064445	0.994442	900	3	-0.43549	0.78449	0.81503	0.999611	12570	1	-0.43549
FBgn0263080	6	0.019231	0.064586	0.994442	901	3	-0.078544	0.28921	0.48675	0.996647	7210	2	-0.078544
FBgn0033855	6	0.019231	0.064586	0.994442	902	3	-0.31911	0.622	0.74557	0.999611	11191	1	-0.31911
FBgn0050073	1	0.019248	0.019239	0.989383	903	1	-1.4089	0.98075	0.98088	0.999611	15316	0	-1.4089
FBgn0040601	5	0.019252	0.060516	0.994442	904	3	-0.53355	0.015121	0.048977	0.98853	794	1	-0.53355
FBgn0085263	6	0.019299	0.064767	0.994442	905	4	-0.51358	0.50838	0.65634	0.996647	9876	1	-0.51358
FBgn0039065	3	0.01931	0.049941	0.994442	906	2	-0.76938	0.16227	0.25968	0.995008	4808	1	-0.76938
FBgn0034154	6	0.019311	0.064796	0.994442	907	3	-0.25108	0.033023	0.099403	0.991936	1478	2	-0.25108
FBgn0046296	6	0.01934	0.064867	0.994442	908	2	0.049213	0.32388	0.51241	0.996647	7699	2	0.049213
FBgn0003268	6	0.019398	0.064991	0.994442	909	3	-0.66776	0.81881	0.83525	0.999611	12946	1	-0.66776
FBgn0033195	6	0.019456	0.065142	0.994442	910	3	-0.27573	0.7495	0.7971	0.999611	12225	1	-0.27573
FBgn0036510	4	0.019467	0.0537	0.994442	911	1	0.22441	0.22182	0.3471	0.995008	6005	2	0.22441
FBgn0263506	4	0.019467	0.0537	0.994442	912	2	-0.42718	0.69442	0.70338	0.99676	11742	1	-0.42718
FBgn0040079	2	0.019517	0.036104	0.994442	913	2	-0.95691	0.98048	0.98038	0.999611	15310	0	-0.95691
FBgn0004629	6	0.019519	0.065291	0.994442	914	3	-0.11963	0.74248	0.79375	0.999611	12151	1	-0.11963
FBgn0035443	6	0.019547	0.065359	0.994442	915	3	-0.4033	0.88855	0.88856	0.999611	13855	1	-0.4033
FBgn0037762	6	0.019556	0.065378	0.994442	916	1	0.15734	0.13023	0.27893	0.995008	4110	3	0.15734
FBgn0032131	6	0.01956	0.065385	0.994442	917	4	-0.54395	0.41505	0.58207	0.996647	8800	2	-0.54395
FBgn0036836	6	0.019572	0.065425	0.994442	918	4	-0.52592	0.9725	0.97258	0.999611	15192	0	-0.52592
FBgn0052133	6	0.019626	0.065566	0.994442	919	2	-0.20434	0.36713	0.54512	0.996647	8237	2	-0.20434
FBgn0000077	4	0.019631	0.054039	0.994442	920	1	-0.26798	0.65596	0.67453	0.996647	11438	1	-0.26798
FBgn0267781	4	0.019631	0.054039	0.994442	921	2	0.17382	0.027829	0.072326	0.990489	1281	2	0.17382
FBgn0053500	6	0.019776	0.065947	0.994442	922	4	-0.77467	0.16315	0.32457	0.995008	4827	1	-0.77467
FBgn0039150	1	0.019795	0.019811	0.992273	923	1	-3.2028	0.98021	0.98032	0.999611	15305	0	-3.2028
FBgn0033423	6	0.019837	0.066106	0.994442	924	1	0.31283	0.050988	0.14122	0.995008	2061	3	0.31283
FBgn0263773	6	0.019879	0.066203	0.994442	925	3	-0.16644	0.084546	0.21302	0.995008	3085	2	-0.16644
FBgn0034692	6	0.019886	0.066222	0.994442	926	2	-0.041177	0.87789	0.87894	0.999611	13699	1	-0.041177
FBgn0038043	6	0.019933	0.066342	0.994442	927	4	-0.36256	0.96811	0.9682	0.999611	15120	0	-0.36256
FBgn0266038	4	0.019984	0.054804	0.994442	928	2	-0.96027	0.85789	0.85755	0.999611	13440	0	-0.96027
FBgn0054057	6	0.01999	0.066475	0.994442	929	3	-0.064995	0.08404	0.21227	0.995008	3070	3	-0.064995
FBgn0035346	8	0.020001	0.073992	0.994442	930	5	-0.4264	0.56688	0.7396	0.999611	10592	2	-0.4264
FBgn0038880	6	0.02004	0.066617	0.994442	931	3	-0.71958	0.99396	0.99395	0.999874	15522	0	-0.71958
FBgn0039938	6	0.020047	0.066636	0.994442	932	2	-0.67623	0.98982	0.98985	0.999763	15459	0	-0.67623
FBgn0033379	4	0.020096	0.055057	0.994442	933	3	-0.61763	0.93905	0.93878	0.999611	14644	0	-0.61763
FBgn0035546	6	0.020187	0.067002	0.994442	934	2	-0.12001	0.35111	0.53292	0.996647	8051	1	-0.12001
FBgn0085313	6	0.020191	0.067008	0.994442	935	4	-0.30103	0.99155	0.99158	0.999874	15497	0	-0.30103
FBgn0265701	4	0.02024	0.055362	0.994442	936	1	-0.52231	0.93003	0.92964	0.999611	14508	0	-0.52231
FBgn0033033	6	0.020339	0.067371	0.994442	937	2	-0.22246	0.86267	0.86632	0.999611	13503	1	-0.22246
FBgn0053514	6	0.02034	0.067372	0.994442	938	4	-0.35408	0.973	0.97306	0.999611	15198	0	-0.35408
FBgn0041588	6	0.020347	0.067387	0.994442	939	3	-0.48234	0.21508	0.39469	0.995008	5862	2	-0.48234
FBgn0001085	6	0.020364	0.067428	0.994442	940	4	-0.47236	0.9912	0.99121	0.999786	15493	0	-0.47236
FBgn0051542	1	0.020383	0.020373	0.992993	941	1	-1.1539	0.97962	0.97976	0.999611	15288	0	-1.1539
FBgn0264711	6	0.020438	0.067608	0.994442	942	3	-0.80554	0.56261	0.70133	0.99676	10545	1	-0.80554
FBgn0263114	6	0.020471	0.067698	0.994442	943	4	-0.48125	0.74497	0.79491	0.999611	12179	1	-0.48125
FBgn0259685	6	0.020538	0.067847	0.994442	944	2	0.26064	0.065929	0.17471	0.995008	2548	3	0.26064
FBgn0266994	4	0.020552	0.05607	0.994442	945	3	-0.43592	0.94704	0.94686	0.999611	14778	0	-0.43592
FBgn0038016	6	0.020566	0.067925	0.994442	946	4	-0.32947	0.26512	0.46011	0.996647	6819	2	-0.32947
FBgn0032189	6	0.020608	0.068029	0.994442	947	2	-0.033601	0.89792	0.89772	0.999611	14001	0	-0.033601
FBgn0040368	6	0.020633	0.068088	0.994442	948	4	-0.34159	0.1755	0.34159	0.995008	5065	2	-0.34159
FBgn0000179	7	0.020634	0.073105	0.994442	949	3	0.083975	0.83711	0.86575	0.999611	13188	1	0.083975
FBgn0265995	3	0.020652	0.053278	0.994442	950	3	-0.39488	0.97935	0.97948	0.999611	15285	0	-0.39488
FBgn0058263	6	0.020678	0.068211	0.994442	951	1	0.16666	0.56475	0.70314	0.99676	10569	2	0.16666
FBgn0046225	6	0.020679	0.068212	0.994442	952	4	-0.34526	0.20268	0.37836	0.995008	5625	2	-0.34526
FBgn0039473	6	0.020748	0.068372	0.994442	953	2	-0.038919	0.24516	0.43431	0.996647	6453	1	-0.038919
FBgn0035287	6	0.020803	0.068531	0.994442	954	4	-0.62521	0.88422	0.88457	0.999611	13801	1	-0.62521
FBgn0028789	6	0.020807	0.068536	0.994442	955	4	-0.63391	0.96342	0.9635	0.999611	15039	0	-0.63391
FBgn0019830	6	0.020807	0.068536	0.994442	956	4	-0.24427	0.95816	0.95816	0.999611	14957	0	-0.24427
FBgn0053995	2	0.020844	0.038537	0.994442	957	1	-0.19892	0.3125	0.3328	0.995008	7526	1	-0.19892
FBgn0038872	6	0.020861	0.068694	0.994442	958	3	-0.44432	0.92314	0.92291	0.999611	14384	0	-0.44432
FBgn0265545	2	0.020896	0.03863	0.994442	959	2	-0.69815	0.9791	0.97901	0.999611	15283	0	-0.69815
FBgn0262524	4	0.020914	0.056835	0.994442	960	2	-0.93339	0.22934	0.35549	0.995008	6140	1	-0.93339
FBgn0037310	6	0.020975	0.06897	0.994442	961	2	0.043458	0.40159	0.57168	0.996647	8642	2	0.043458
FBgn0267617	4	0.021014	0.057048	0.994442	962	3	-1.2309	0.96936	0.96911	0.999611	15139	0	-1.2309
FBgn0265930	4	0.021014	0.057048	0.994442	963	3	-0.70397	0.87948	0.87901	0.999611	13735	0	-0.70397
FBgn0034270	4	0.021014	0.057048	0.994442	964	3	-0.53184	0.98417	0.98418	0.999611	15380	0	-0.53184
FBgn0032259	6	0.021028	0.069102	0.994442	965	3	-0.4434	0.87789	0.87894	0.999611	13709	1	-0.4434
FBgn0051777	6	0.021043	0.069142	0.994442	966	3	-0.37961	0.59075	0.72535	0.996911	10897	2	-0.37961
FBgn0037200	6	0.021099	0.069289	0.994442	967	3	-0.10468	0.28628	0.48455	0.996647	7171	2	-0.10468
FBgn0085324	6	0.0211	0.069293	0.994442	968	3	-0.33293	0.26109	0.45492	0.996647	6760	2	-0.33293
FBgn0028926	5	0.021151	0.065741	0.994442	969	3	-0.59785	0.93077	0.93093	0.999611	14520	0	-0.59785
FBgn0033608	4	0.021178	0.057423	0.994442	970	2	-0.081362	0.69832	0.70648	0.99676	11768	1	-0.081362
FBgn0011725	6	0.021227	0.069605	0.994442	971	2	-0.24543	0.023967	0.077268	0.990489	1131	2	-0.24543
FBgn0085451	4	0.021236	0.057529	0.994442	972	3	-0.83115	0.95821	0.95805	0.999611	14960	0	-0.83115
FBgn0011703	6	0.021239	0.069639	0.994442	973	2	0.0015325	0.25059	0.44144	0.996647	6549	2	0.0015325
FBgn0032922	4	0.021293	0.057653	0.994442	974	1	-0.15945	0.46321	0.5585	0.996647	9340	1	-0.15945
FBgn0031657	6	0.021305	0.069801	0.994442	975	4	-0.56145	0.23478	0.42069	0.996492	6255	1	-0.56145
FBgn0039255	6	0.021309	0.069808	0.994442	976	1	0.097971	0.30231	0.49633	0.996647	7383	2	0.097971
FBgn0037184	4	0.021345	0.057765	0.994442	977	2	-0.2324	0.92558	0.9252	0.999611	14428	0	-0.2324
FBgn0035140	4	0.021386	0.057839	0.994442	978	1	-0.10447	0.13794	0.25315	0.995008	4284	2	-0.10447
FBgn0266250	4	0.021413	0.057899	0.994442	979	3	-0.47613	0.52278	0.59041	0.996647	10049	1	-0.47613
FBgn0040942	6	0.021439	0.070168	0.994442	980	3	-0.32334	0.9516	0.95148	0.999611	14850	0	-0.32334
FBgn0026391	6	0.021449	0.070197	0.994442	981	2	-0.024661	0.7227	0.78466	0.999611	11973	1	-0.024661
FBgn0029778	6	0.021488	0.070293	0.994442	982	4	-0.32781	0.42504	0.58993	0.996647	8900	2	-0.32781
FBgn0039332	6	0.021488	0.070293	0.994442	983	4	-1.209	0.17862	0.34581	0.995008	5131	2	-1.209
FBgn0035588	4	0.021506	0.058111	0.994442	984	2	-0.30173	0.099988	0.21038	0.995008	3471	1	-0.30173
FBgn0266100	8	0.021521	0.078284	0.994442	985	3	-0.14505	0.72404	0.83486	0.999611	11984	2	-0.14505
FBgn0026713	6	0.021554	0.070467	0.994442	986	4	-0.709	0.99566	0.99569	0.999874	15552	0	-0.709
FBgn0054054	6	0.021583	0.070536	0.994442	987	2	-0.19385	0.88182	0.88243	0.999611	13766	1	-0.19385
FBgn0032079	6	0.021625	0.070646	0.994442	988	3	-0.36274	0.46783	0.62368	0.996647	9396	1	-0.36274
FBgn0266830	4	0.021665	0.058465	0.994442	989	3	-0.57993	0.6244	0.65265	0.996647	11205	1	-0.57993
FBgn0024689	6	0.021717	0.070872	0.994442	990	3	-0.30959	0.41609	0.58286	0.996647	8812	2	-0.30959
FBgn0027081	7	0.021799	0.076721	0.994442	991	3	-0.55975	0.51724	0.68273	0.996647	9979	2	-0.55975
FBgn0266395	4	0.0218	0.058778	0.994442	992	3	-0.5656	0.2173	0.34214	0.995008	5913	1	-0.5656
FBgn0263654	2	0.021808	0.040256	0.994442	993	1	-0.35633	0.62302	0.62279	0.996647	11196	0	-0.35633
FBgn0051718	2	0.021816	0.040268	0.994442	994	2	-1.5256	0.97818	0.97809	0.999611	15264	0	-1.5256
FBgn0040068	2	0.021816	0.040268	0.994442	995	2	-1.8678	0.97818	0.97809	0.999611	15265	0	-1.8678
FBgn0035815	2	0.021816	0.040268	0.994442	996	2	-1.284	0.97818	0.97809	0.999611	15266	0	-1.284
FBgn0262483	6	0.021819	0.071117	0.994442	997	4	-0.53815	0.84689	0.85432	0.999611	13299	1	-0.53815
FBgn0000426	6	0.021819	0.071117	0.994442	998	4	-0.35308	0.52946	0.67359	0.996647	10135	1	-0.35308
FBgn0053919	6	0.021834	0.071155	0.994442	999	2	0.051754	0.099379	0.23478	0.995008	3455	2	0.051754
FBgn0038590	6	0.021834	0.071155	0.994442	1000	4	-0.45943	0.95059	0.95046	0.999611	14831	0	-0.45943
FBgn0014877	6	0.021856	0.071197	0.994442	1001	3	-0.23217	0.39086	0.56342	0.996647	8522	1	-0.23217
FBgn0032906	6	0.021881	0.071261	0.994442	1002	3	-0.64042	0.90566	0.90538	0.999611	14128	0	-0.64042
FBgn0033278	6	0.021921	0.071352	0.994442	1003	4	-0.41298	0.24739	0.43719	0.996647	6482	2	-0.41298
FBgn0001137	6	0.021921	0.071352	0.994442	1004	4	-0.55343	0.22477	0.40744	0.995008	6066	2	-0.55343
FBgn0267221	4	0.021946	0.059077	0.994442	1005	2	-0.33927	0.92955	0.92916	0.999611	14502	0	-0.33927
FBgn0036951	6	0.021974	0.07148	0.994442	1006	3	-0.221	0.91364	0.91334	0.999611	14236	0	-0.221
FBgn0267680	4	0.022028	0.059248	0.994442	1007	3	-0.9677	0.49203	0.57358	0.996647	9682	1	-0.9677
FBgn0034976	4	0.022028	0.059248	0.994442	1008	3	-0.58737	0.87545	0.87497	0.999611	13669	0	-0.58737
FBgn0031390	6	0.022039	0.071652	0.994442	1009	3	0.031421	0.17226	0.33708	0.995008	4990	3	0.031421
FBgn0003023	4	0.022045	0.059284	0.994442	1010	2	-0.56885	0.88022	0.87976	0.999611	13747	0	-0.56885
FBgn0041180	6	0.022058	0.071695	0.994442	1011	2	-0.2909	0.97653	0.9766	0.999611	15244	0	-0.2909
FBgn0034909	6	0.022079	0.071748	0.994442	1012	3	-0.22387	0.75648	0.8005	0.999611	12306	1	-0.22387
FBgn0004554	6	0.022088	0.071767	0.994442	1013	4	-0.31562	0.79579	0.82141	0.999611	12686	1	-0.31562
FBgn0037067	6	0.022113	0.071834	0.994442	1014	2	-0.12579	0.0068619	0.027417	0.980433	387	1	-0.12579
FBgn0040929	4	0.022128	0.059466	0.994442	1015	2	-0.18225	0.23495	0.36174	0.995008	6257	1	-0.18225
FBgn0033816	4	0.022158	0.059527	0.994442	1016	1	0.031238	0.45544	0.55452	0.996647	9261	1	0.031238
FBgn0002868	4	0.022176	0.059569	0.994442	1017	3	-0.57468	0.41408	0.534	0.996647	8792	1	-0.57468
FBgn0263488	4	0.022176	0.05957	0.994442	1018	3	-0.2771	0.75387	0.75435	0.999611	12284	1	-0.2771
FBgn0263051	5	0.022177	0.06856	0.994442	1019	3	-0.27915	0.92899	0.9292	0.999611	14490	0	-0.27915
FBgn0037422	6	0.022207	0.072079	0.994442	1020	3	-0.32278	0.4289	0.59297	0.996647	8945	2	-0.32278
FBgn0034265	6	0.022207	0.072079	0.994442	1021	3	-0.49943	0.84072	0.85	0.999611	13235	1	-0.49943
FBgn0039045	6	0.022207	0.072079	0.994442	1022	4	-0.72894	0.99644	0.99643	0.999874	15561	0	-0.72894
FBgn0030746	6	0.022262	0.072213	0.994442	1023	4	-0.47626	0.95358	0.95352	0.999611	14882	0	-0.47626
FBgn0038811	2	0.022273	0.041139	0.994442	1024	2	-2.0738	0.97773	0.97764	0.999611	15258	0	-2.0738
FBgn0030930	4	0.022275	0.059796	0.994442	1025	1	-0.0047481	0.79832	0.79783	0.999611	12709	0	-0.0047481
FBgn0259705	1	0.022279	0.02224	0.994442	1026	1	-0.35254	0.97772	0.97783	0.999611	15257	0	-0.35254
FBgn0003866	5	0.022408	0.069186	0.994442	1027	3	-0.33696	0.44284	0.58862	0.996647	9106	1	-0.33696
FBgn0033905	6	0.022419	0.072637	0.994442	1028	4	-0.42945	0.57456	0.71147	0.996911	10681	1	-0.42945
FBgn0038447	6	0.022429	0.072657	0.994442	1029	2	-0.23619	0.21155	0.39003	0.995008	5799	1	-0.23619
FBgn0030587	5	0.022466	0.069339	0.994442	1030	2	0.086122	0.35105	0.50208	0.996647	8050	2	0.086122
FBgn0024294	6	0.022479	0.072769	0.994442	1031	3	-0.87544	0.29743	0.49278	0.996647	7320	1	-0.87544
FBgn0267186	4	0.022528	0.060315	0.994442	1032	3	-0.66085	0.74398	0.74519	0.999611	12171	1	-0.66085
FBgn0262106	4	0.022528	0.060315	0.994442	1033	3	-0.91919	0.99067	0.99071	0.999763	15483	0	-0.91919
FBgn0261811	10	0.022529	0.088407	0.994442	1034	4	-0.23435	0.49051	0.71618	0.996911	9665	2	-0.23435
FBgn0040251	5	0.022647	0.069833	0.994442	1035	4	-0.51203	0.84684	0.84718	0.999611	13298	1	-0.51203
FBgn0036141	6	0.022665	0.073228	0.994442	1036	3	-0.23667	0.78138	0.81334	0.999611	12537	1	-0.23667
FBgn0030099	6	0.022665	0.073228	0.994442	1037	3	-0.53127	0.37612	0.55202	0.996647	8343	1	-0.53127
FBgn0034275	6	0.022697	0.07331	0.994442	1038	4	-0.36115	0.91421	0.91389	0.999611	14245	0	-0.36115
FBgn0267451	4	0.022742	0.060798	0.994442	1039	1	0.047094	0.21661	0.34135	0.995008	5891	1	0.047094
FBgn0033708	6	0.022781	0.073526	0.994442	1040	4	-0.54422	0.99682	0.9968	0.999874	15567	0	-0.54422
FBgn0036225	6	0.022814	0.073611	0.994442	1041	2	0.20933	0.15708	0.31617	0.995008	4691	3	0.20933
FBgn0265417	6	0.022842	0.073676	0.994442	1042	4	-0.6309	0.56163	0.7005	0.99676	10536	1	-0.6309
FBgn0015038	6	0.022909	0.073849	0.994442	1043	3	-0.27115	0.0066491	0.02663	0.980433	375	2	-0.27115
FBgn0036920	6	0.022919	0.073882	0.994442	1044	4	-0.19714	0.26937	0.46554	0.996647	6903	1	-0.19714
FBgn0035087	8	0.022933	0.082263	0.994442	1045	4	-0.22834	0.39171	0.60946	0.996647	8534	2	-0.22834
FBgn0031397	6	0.022985	0.074055	0.994442	1046	3	-0.24002	0.50554	0.65402	0.996647	9843	2	-0.24002
FBgn0034345	6	0.022989	0.074067	0.994442	1047	2	-0.050665	0.047687	0.13372	0.995008	1948	2	-0.050665
FBgn0003256	4	0.023037	0.061428	0.994442	1048	3	-0.40217	0.30946	0.44457	0.996647	7482	1	-0.40217
FBgn0085483	6	0.023093	0.074333	0.994442	1049	3	-0.2894	0.13346	0.28346	0.995008	4181	3	-0.2894
FBgn0045759	6	0.023093	0.074333	0.994442	1050	2	0.32959	0.061975	0.16604	0.995008	2425	4	0.32959
FBgn0032656	6	0.023152	0.074475	0.994442	1051	4	-0.34667	0.24787	0.4378	0.996647	6516	2	-0.34667
FBgn0260743	6	0.023171	0.074517	0.994442	1052	3	-0.27911	0.65793	0.75849	0.999611	11456	1	-0.27911
FBgn0035204	6	0.023198	0.074585	0.994442	1053	2	-0.11948	0.55107	0.69168	0.996647	10403	2	-0.11948
FBgn0038704	4	0.023231	0.061875	0.994442	1054	2	-0.34953	0.21014	0.33402	0.995008	5766	1	-0.34953
FBgn0264699	6	0.023303	0.074842	0.994442	1055	2	0.022237	0.41031	0.57845	0.996647	8751	2	0.022237
FBgn0261461	10	0.023343	0.090931	0.994442	1056	3	-0.1379	0.44181	0.6828	0.996647	9092	3	-0.1379
FBgn0032850	4	0.023349	0.062136	0.994442	1057	1	0.40823	0.041295	0.10053	0.994224	1754	2	0.40823
FBgn0037063	4	0.023398	0.062251	0.994442	1058	3	-0.42321	0.79382	0.79326	0.999611	12668	0	-0.42321
FBgn0004363	8	0.023401	0.083551	0.994442	1059	5	-0.77586	0.78831	0.87232	0.999611	12616	1	-0.77586
FBgn0263596	6	0.023408	0.075088	0.994442	1060	1	0.15828	0.07345	0.19108	0.995008	2763	3	0.15828
FBgn0036285	6	0.023416	0.075102	0.994442	1061	3	-0.30221	0.4086	0.5771	0.996647	8739	2	-0.30221
FBgn0036085	6	0.023513	0.075355	0.994442	1062	2	-0.19271	0.052715	0.14517	0.995008	2130	1	-0.19271
FBgn0027084	4	0.023559	0.062594	0.994442	1063	1	0.054199	0.82161	0.8211	0.999611	12979	0	0.054199
FBgn0033160	6	0.023598	0.075557	0.994442	1064	4	-0.60606	0.27083	0.46744	0.996647	6923	2	-0.60606
FBgn0016053	2	0.023624	0.043594	0.994442	1065	2	-1.2734	0.97638	0.97628	0.999611	15242	0	-1.2734
FBgn0036560	6	0.023642	0.075659	0.994442	1066	4	-0.49651	0.23845	0.42553	0.996647	6327	1	-0.49651
FBgn0011274	6	0.023688	0.075786	0.994442	1067	2	0.20579	0.0064364	0.025925	0.980433	368	4	0.20579
FBgn0034834	6	0.023693	0.075804	0.994442	1068	3	-0.74712	0.83775	0.84797	0.999611	13195	1	-0.74712
FBgn0267119	4	0.023774	0.063056	0.994442	1069	3	-0.54222	0.97872	0.97867	0.999611	15279	0	-0.54222
FBgn0052811	6	0.023795	0.076042	0.994442	1070	3	-0.26063	0.2805	0.4799	0.996647	7092	1	-0.26063
FBgn0051501	6	0.023816	0.076094	0.994442	1071	4	-0.64222	0.92636	0.92618	0.999611	14448	0	-0.64222
FBgn0024191	6	0.023816	0.076094	0.994442	1072	4	-0.77699	0.001014	0.0051678	0.980433	66	2	-0.77699
FBgn0265303	4	0.023951	0.063431	0.994442	1073	3	-0.50963	0.93237	0.93198	0.999611	14540	0	-0.50963
FBgn0033353	6	0.024011	0.076578	0.994442	1074	4	-0.31679	0.98526	0.98528	0.999611	15402	0	-0.31679
FBgn0038569	6	0.024011	0.076578	0.994442	1075	4	-0.58546	0.99621	0.99621	0.999874	15557	0	-0.58546
FBgn0015572	6	0.024066	0.076728	0.994442	1076	4	-0.74301	0.93918	0.93909	0.999611	14647	0	-0.74301
FBgn0032408	6	0.024066	0.076728	0.994442	1077	4	-0.43405	0.96861	0.96872	0.999611	15125	0	-0.43405
FBgn0261278	4	0.024096	0.063756	0.994442	1078	1	-0.40068	0.30032	0.43445	0.996647	7357	1	-0.40068
FBgn0052240	6	0.024107	0.076823	0.994442	1079	2	-0.19838	0.14507	0.29953	0.995008	4449	1	-0.19838
FBgn0035771	5	0.024123	0.073858	0.994442	1080	4	-0.76829	0.79802	0.80378	0.999611	12707	1	-0.76829
FBgn0259185	6	0.024136	0.076901	0.994442	1081	4	-0.43084	0.94136	0.94126	0.999611	14680	0	-0.43084
FBgn0030900	6	0.024229	0.077143	0.994442	1082	4	-0.36074	0.90208	0.90184	0.999611	14060	0	-0.36074
FBgn0028671	4	0.024318	0.064218	0.994442	1083	3	-0.43691	0.7837	0.78315	0.999611	12561	0	-0.43691
FBgn0001087	6	0.024373	0.07751	0.994442	1084	2	0.08864	0.24283	0.4313	0.996647	6406	2	0.08864
FBgn0039066	6	0.024373	0.07751	0.994442	1085	2	0.18502	0.10291	0.23983	0.995008	3541	3	0.18502
FBgn0265988	6	0.02443	0.077653	0.994442	1086	3	-0.45071	0.24739	0.43719	0.996647	6479	1	-0.45071
FBgn0053110	6	0.024456	0.077719	0.994442	1087	3	0.05659	0.049149	0.13707	0.995008	2000	3	0.05659
FBgn0030293	6	0.024469	0.077753	0.994442	1088	4	-0.25417	0.2336	0.41912	0.996197	6229	2	-0.25417
FBgn0016119	5	0.024506	0.074904	0.994442	1089	4	-0.37643	0.97885	0.97893	0.999611	15280	0	-0.37643
FBgn0050280	6	0.024526	0.077901	0.994442	1090	2	0.035645	0.065323	0.17341	0.995008	2532	2	0.035645
FBgn0020371	6	0.024547	0.077949	0.994442	1091	4	-0.5277	0.088405	0.21875	0.995008	3187	2	-0.5277
FBgn0004425	6	0.024547	0.077949	0.994442	1092	4	-0.52571	0.33387	0.5199	0.996647	7819	1	-0.52571
FBgn0037292	6	0.024565	0.077989	0.994442	1093	3	-0.56821	0.72407	0.78527	0.999611	11985	1	-0.56821
FBgn0035068	3	0.024577	0.062752	0.994442	1094	2	-0.58778	0.031137	0.077793	0.990489	1409	1	-0.58778
FBgn0035619	4	0.024591	0.064828	0.994442	1095	3	-0.25625	0.70858	0.71474	0.996911	11861	1	-0.25625
FBgn0000524	6	0.024666	0.078265	0.994442	1096	1	0.1445	0.17758	0.34442	0.995008	5112	3	0.1445
FBgn0038642	5	0.024741	0.075525	0.994442	1097	4	-0.25733	0.98366	0.98375	0.999611	15374	0	-0.25733
FBgn0261396	4	0.02475	0.065182	0.994442	1098	1	-0.11221	0.2919	0.42504	0.996647	7245	1	-0.11221
FBgn0037710	5	0.024798	0.075669	0.994442	1099	2	-0.22199	0.77859	0.78896	0.999611	12507	1	-0.22199
FBgn0020306	6	0.024806	0.078588	0.994442	1100	3	-0.13897	0.77156	0.80817	0.999611	12436	1	-0.13897
FBgn0037999	6	0.024842	0.078684	0.994442	1101	4	-0.957	0.99206	0.9921	0.999874	15500	0	-0.957
FBgn0264826	4	0.024881	0.06546	0.994442	1102	3	-0.70508	0.0049114	0.017048	0.980433	298	1	-0.70508
FBgn0266202	4	0.02489	0.065474	0.994442	1103	1	0.46866	0.092876	0.20121	0.995008	3313	3	0.46866
FBgn0011277	3	0.02491	0.063533	0.994442	1104	1	-0.57966	0.25973	0.36796	0.995008	6727	1	-0.57966
FBgn0263664	4	0.024936	0.065574	0.994442	1105	1	0.15888	0.16203	0.28022	0.995008	4803	2	0.15888
FBgn0024973	6	0.024992	0.079038	0.994442	1106	4	-0.43378	0.97845	0.97851	0.999611	15272	0	-0.43378
FBgn0261565	17	0.025005	0.1151	0.994442	1107	9	-0.31864	0.52757	0.80603	0.999611	10114	4	-0.31864
FBgn0032451	6	0.025015	0.079104	0.994442	1108	3	-0.18671	0.17986	0.3475	0.995008	5154	1	-0.18671
FBgn0050487	6	0.025021	0.079118	0.994442	1109	4	-0.34644	0.90566	0.90538	0.999611	14127	0	-0.34644
FBgn0034259	6	0.025085	0.079276	0.994442	1110	3	-0.22832	0.87615	0.87743	0.999611	13678	1	-0.22832
FBgn0052227	6	0.025101	0.079318	0.994442	1111	3	-0.30444	0.70387	0.77656	0.999611	11817	1	-0.30444
FBgn0037203	8	0.025116	0.088443	0.994442	1112	5	-0.58815	0.68221	0.80747	0.999611	11634	2	-0.58815
FBgn0038515	4	0.025216	0.066182	0.994442	1113	3	-0.29975	0.93376	0.93346	0.999611	14564	0	-0.29975
FBgn0263392	7	0.025223	0.087197	0.994442	1114	3	-0.24664	0.054745	0.15711	0.995008	2195	2	-0.24664
FBgn0033592	6	0.025294	0.079807	0.994442	1115	3	-0.19839	0.70177	0.77569	0.999611	11800	1	-0.19839
FBgn0267192	4	0.025298	0.066371	0.994442	1116	3	-0.92553	0.7991	0.79864	0.999611	12720	0	-0.92553
FBgn0028646	8	0.025314	0.088993	0.994442	1117	4	-0.090501	0.38419	0.60226	0.996647	8437	3	-0.090501
FBgn0263742	6	0.025327	0.079899	0.994442	1118	4	-0.39475	0.29071	0.48784	0.996647	7232	1	-0.39475
FBgn0030054	6	0.025364	0.079991	0.994442	1119	2	0.07935	0.44071	0.60228	0.996647	9078	2	0.07935
FBgn0037130	6	0.025419	0.080136	0.994442	1120	4	-0.45353	0.96471	0.96477	0.999611	15069	0	-0.45353
FBgn0051463	6	0.025457	0.080223	0.994442	1121	2	-0.17409	0.5512	0.69178	0.996647	10405	1	-0.17409
FBgn0039554	5	0.025462	0.077454	0.994442	1122	3	-0.33396	0.96961	0.96972	0.999611	15142	0	-0.33396
FBgn0003444	6	0.025504	0.08033	0.994442	1123	2	0.21075	0.24298	0.43149	0.996647	6407	3	0.21075
FBgn0032414	5	0.025555	0.077723	0.994442	1124	3	-0.15735	0.84367	0.84408	0.999611	13263	1	-0.15735
FBgn0086266	6	0.025562	0.080477	0.994442	1125	3	-0.46446	0.97053	0.97065	0.999611	15162	0	-0.46446
FBgn0005427	6	0.025573	0.080503	0.994442	1126	4	-0.55384	0.79316	0.81984	0.999611	12658	1	-0.55384
FBgn0266709	6	0.025573	0.080503	0.994442	1127	4	-0.75801	0.33681	0.5221	0.996647	7854	1	-0.75801
FBgn0034158	6	0.025573	0.080503	0.994442	1128	4	-0.55891	0.5794	0.71562	0.996911	10749	1	-0.55891
FBgn0020377	6	0.025574	0.080504	0.994442	1129	1	0.39343	0.015843	0.056677	0.990489	816	4	0.39343
FBgn0263495	4	0.025589	0.066981	0.994442	1130	1	0.11	0.66807	0.68333	0.996647	11523	1	0.11
FBgn0033953	5	0.025596	0.077856	0.994442	1131	2	-0.71196	0.79633	0.80247	0.999611	12691	1	-0.71196
FBgn0265955	4	0.025653	0.067121	0.994442	1132	3	-0.62918	0.49136	0.57323	0.996647	9676	1	-0.62918
FBgn0051633	6	0.025655	0.080699	0.994442	1133	4	-0.48893	0.59266	0.72701	0.997369	10923	1	-0.48893
FBgn0031738	8	0.025664	0.090005	0.994442	1134	4	-0.33907	0.98226	0.98228	0.999611	15346	0	-0.33907
FBgn0035498	6	0.025713	0.080849	0.994442	1135	1	0.24157	0.25524	0.44741	0.996647	6637	3	0.24157
FBgn0028530	4	0.025729	0.06727	0.994442	1136	2	-0.19122	0.84196	0.84141	0.999611	13247	0	-0.19122
FBgn0039737	6	0.02574	0.08092	0.994442	1137	4	-0.29861	0.95358	0.95352	0.999611	14879	0	-0.29861
FBgn0022981	6	0.02574	0.08092	0.994442	1138	4	-0.39283	0.47536	0.62966	0.996647	9486	2	-0.39283
FBgn0267109	4	0.025784	0.067375	0.994442	1139	2	-0.75716	0.9732	0.97298	0.999611	15201	0	-0.75716
FBgn0045469	4	0.025784	0.067375	0.994442	1140	2	-0.73281	0.93689	0.93662	0.999611	14615	0	-0.73281
FBgn0265578	6	0.025927	0.081381	0.994442	1141	3	-0.40651	0.9797	0.97971	0.999611	15290	0	-0.40651
FBgn0037388	6	0.025927	0.081381	0.994442	1142	3	-0.16325	0.67491	0.76501	0.999611	11576	1	-0.16325
FBgn0030291	6	0.025982	0.081524	0.994442	1143	4	-0.44112	0.80436	0.8264	0.999611	12775	1	-0.44112
FBgn0052407	6	0.026	0.081573	0.994442	1144	3	-0.65202	0.9789	0.97895	0.999611	15281	0	-0.65202
FBgn0038938	2	0.026018	0.047781	0.994442	1145	2	-1.6886	0.97398	0.97391	0.999611	15209	0	-1.6886
FBgn0033222	6	0.026062	0.081732	0.994442	1146	3	-0.33728	0.70283	0.77614	0.999611	11804	1	-0.33728
FBgn0034902	6	0.026075	0.081753	0.994442	1147	4	-0.48966	0.76104	0.80277	0.999611	12350	1	-0.48966
FBgn0034276	6	0.026132	0.081881	0.994442	1148	2	0.060223	0.85994	0.86412	0.999611	13461	1	0.060223
FBgn0031208	6	0.026211	0.082063	0.994442	1149	2	-0.67757	0.60448	0.73739	0.999611	11046	1	-0.67757
FBgn0266234	4	0.026236	0.068353	0.994442	1150	3	-0.24686	0.24989	0.37817	0.995008	6535	1	-0.24686
FBgn0051759	6	0.026236	0.082132	0.994442	1151	3	-0.18396	0.86423	0.8676	0.999611	13522	1	-0.18396
FBgn0037454	6	0.026249	0.082156	0.994442	1152	3	-0.72524	0.75036	0.79751	0.999611	12243	1	-0.72524
FBgn0036118	4	0.026266	0.068404	0.994442	1153	2	-0.3068	0.58208	0.62524	0.996647	10784	1	-0.3068
FBgn0261587	5	0.026289	0.079768	0.994442	1154	2	-0.36698	0.2475	0.40636	0.995008	6491	1	-0.36698
FBgn0267312	4	0.02629	0.06845	0.994442	1155	3	-0.2949	0.96332	0.96309	0.999611	15037	0	-0.2949
FBgn0039464	5	0.026428	0.080179	0.994442	1156	2	-0.43856	0.92973	0.92992	0.999611	14506	0	-0.43856
FBgn0266786	4	0.026455	0.068807	0.994442	1157	3	-1.067	0.11464	0.2269	0.995008	3765	1	-1.067
FBgn0024897	6	0.02648	0.082732	0.994442	1158	2	0.061806	0.1091	0.24873	0.995008	3656	3	0.061806
FBgn0036605	6	0.026488	0.082755	0.994442	1159	2	0.15024	0.11433	0.2564	0.995008	3755	3	0.15024
FBgn0032796	6	0.026491	0.082761	0.994442	1160	4	-0.42963	0.36217	0.5414	0.996647	8179	2	-0.42963
FBgn0266236	4	0.026514	0.068926	0.994442	1161	3	-0.41178	0.96324	0.963	0.999611	15035	0	-0.41178
FBgn0263663	6	0.02655	0.082898	0.994442	1162	4	-0.82771	0.9991	0.99911	0.999874	15614	0	-0.82771
FBgn0033713	5	0.026557	0.08051	0.994442	1163	3	-0.42404	0.79834	0.80405	0.999611	12710	1	-0.42404
FBgn0038131	6	0.02662	0.08307	0.994442	1164	2	-0.0061043	0.86703	0.86988	0.999611	13560	1	-0.0061043
FBgn0261805	6	0.026736	0.083363	0.994442	1165	3	-0.40679	0.23797	0.42491	0.996647	6319	1	-0.40679
FBgn0003373	6	0.026736	0.083363	0.994442	1166	3	-0.50211	0.065694	0.17419	0.995008	2544	2	-0.50211
FBgn0028415	6	0.026736	0.083363	0.994442	1167	3	-0.20156	0.018995	0.064861	0.990489	930	3	-0.20156
FBgn0033789	6	0.026736	0.083363	0.994442	1168	4	-0.70362	0.87552	0.8769	0.999611	13670	1	-0.70362
FBgn0264617	4	0.026764	0.069473	0.994442	1169	3	-0.61114	0.87462	0.87416	0.999611	13648	0	-0.61114
FBgn0030362	8	0.02677	0.093039	0.994442	1170	5	-0.63279	0.013751	0.056696	0.990489	755	2	-0.63279
FBgn0038627	5	0.026773	0.081117	0.994442	1171	4	-0.50526	0.88286	0.88326	0.999611	13777	0	-0.50526
FBgn0036740	4	0.026802	0.069561	0.994442	1172	3	-0.35548	0.98013	0.9801	0.999611	15304	0	-0.35548
FBgn0283494	6	0.026847	0.08363	0.994442	1173	3	-0.36594	0.55151	0.69204	0.996647	10408	1	-0.36594
FBgn0028847	6	0.026847	0.08363	0.994442	1174	2	0.2078	0.032254	0.097558	0.990489	1444	3	0.2078
FBgn0004406	6	0.026847	0.08363	0.994442	1175	3	-0.33803	0.19887	0.37319	0.995008	5549	2	-0.33803
FBgn0260635	17	0.026864	0.12164	0.994442	1176	5	0.078715	0.277	0.59544	0.996647	7043	6	0.078715
FBgn0031786	6	0.026869	0.083693	0.994442	1177	4	-0.79662	0.32933	0.51654	0.996647	7768	1	-0.79662
FBgn0085474	6	0.026869	0.083693	0.994442	1178	4	-0.72681	0.85462	0.85999	0.999611	13404	1	-0.72681
FBgn0036880	6	0.026869	0.083693	0.994442	1179	4	-0.71129	0.045432	0.12857	0.995008	1879	1	-0.71129
FBgn0264994	4	0.026931	0.069839	0.994442	1180	3	-0.57817	0.98469	0.9847	0.999611	15389	0	-0.57817
FBgn0029895	6	0.026994	0.083981	0.994442	1181	3	-0.2634	0.9396	0.93951	0.999611	14654	0	-0.2634
FBgn0050265	6	0.027121	0.084276	0.994442	1182	3	-0.16566	0.95089	0.95075	0.999611	14834	0	-0.16566
FBgn0259851	1	0.027176	0.027111	0.994442	1183	1	-0.50049	0.97282	0.97293	0.999611	15197	0	-0.50049
FBgn0001269	6	0.027178	0.084423	0.994442	1184	2	0.014272	0.39315	0.56513	0.996647	8554	2	0.014272
FBgn0030921	6	0.027188	0.084447	0.994442	1185	3	-0.48439	0.16208	0.32311	0.995008	4804	2	-0.48439
FBgn0004397	6	0.027247	0.084602	0.994442	1186	2	-0.18484	0.90247	0.90224	0.999611	14068	0	-0.18484
FBgn0033972	4	0.027266	0.070592	0.994442	1187	3	-1.0839	0.87084	0.87043	0.999611	13608	0	-1.0839
FBgn0035568	6	0.027317	0.084789	0.994442	1188	2	0.13752	0.10763	0.24666	0.995008	3626	3	0.13752
FBgn0262579	12	0.02739	0.11036	0.994442	1189	7	-0.34729	0.41234	0.67943	0.996647	8775	3	-0.34729
FBgn0263049	4	0.02743	0.070949	0.994442	1190	2	-0.1766	0.12662	0.24019	0.995008	4029	1	-0.1766
FBgn0052192	6	0.027456	0.085168	0.994442	1191	2	0.029438	0.67033	0.76319	0.999611	11537	1	0.029438
FBgn0035581	6	0.027567	0.085448	0.994442	1192	3	-0.43082	0.21106	0.38937	0.995008	5793	2	-0.43082
FBgn0011481	6	0.027596	0.085512	0.994442	1193	1	0.13719	0.23004	0.41445	0.995916	6154	3	0.13719
FBgn0266249	4	0.027674	0.071487	0.994442	1194	3	-0.82608	0.98685	0.98686	0.999763	15422	0	-0.82608
FBgn0032509	4	0.027674	0.071487	0.994442	1195	3	-0.97297	0.4371	0.54529	0.996647	9031	1	-0.97297
FBgn0000448	8	0.027675	0.095569	0.994442	1196	2	-0.021601	0.45662	0.67065	0.996647	9279	1	-0.021601
FBgn0266987	4	0.027706	0.071566	0.994442	1197	2	-0.012148	0.095588	0.20537	0.995008	3385	2	-0.012148
FBgn0040228	6	0.027735	0.085855	0.994442	1198	1	0.14933	0.17292	0.33799	0.995008	5007	3	0.14933
FBgn0003891	3	0.027799	0.070349	0.994442	1199	2	-0.61431	0.57681	0.58576	0.996647	10713	1	-0.61431
FBgn0031174	6	0.027808	0.086032	0.994442	1200	3	-0.072567	0.14515	0.29964	0.995008	4450	3	-0.072567
FBgn0034463	5	0.027823	0.083989	0.994442	1201	2	0.044764	0.70356	0.73975	0.999611	11811	1	0.044764
FBgn0039609	6	0.027828	0.08608	0.994442	1202	3	-0.1615	0.19518	0.36819	0.995008	5460	2	-0.1615
FBgn0037073	6	0.027862	0.086174	0.994442	1203	3	-0.36065	0.64973	0.75539	0.999611	11396	1	-0.36065
FBgn0267796	6	0.027862	0.086174	0.994442	1204	2	-0.35559	0.32299	0.51169	0.996647	7686	2	-0.35559
FBgn0039860	6	0.027874	0.086202	0.994442	1205	2	-0.25936	0.081949	0.2092	0.995008	3021	2	-0.25936
FBgn0264975	6	0.027944	0.086365	0.994442	1206	1	-0.050784	0.40178	0.57183	0.996647	8644	2	-0.050784
FBgn0267313	4	0.027945	0.07207	0.994442	1207	3	-0.53655	0.39453	0.5248	0.996647	8572	1	-0.53655
FBgn0085219	6	0.027969	0.086439	0.994442	1208	4	-0.50437	0.79066	0.8184	0.999611	12632	1	-0.50437
FBgn0026323	6	0.027969	0.086439	0.994442	1209	4	-0.71661	0.98356	0.98359	0.999611	15372	0	-0.71661
FBgn0039004	6	0.027969	0.086439	0.994442	1210	4	-0.67257	0.98044	0.98047	0.999611	15309	0	-0.67257
FBgn0020429	6	0.027969	0.086439	0.994442	1211	4	-0.41689	0.43712	0.5995	0.996647	9032	2	-0.41689
FBgn0025835	6	0.027969	0.086439	0.994442	1212	4	-1.0223	0.95618	0.95615	0.999611	14917	0	-1.0223
FBgn0035703	6	0.027969	0.086439	0.994442	1213	4	-0.98053	0.4236	0.58881	0.996647	8877	1	-0.98053
FBgn0266410	6	0.027969	0.086439	0.994442	1214	4	-0.61165	0.052953	0.14571	0.995008	2137	1	-0.61165
FBgn0265192	6	0.027969	0.086439	0.994442	1215	4	-0.60179	0.98141	0.98144	0.999611	15329	0	-0.60179
FBgn0036255	6	0.027969	0.086439	0.994442	1216	4	-0.47214	0.80496	0.82677	0.999611	12781	1	-0.47214
FBgn0052115	6	0.027969	0.086439	0.994442	1217	4	-0.83979	0.9953	0.99533	0.999874	15546	0	-0.83979
FBgn0083973	6	0.027969	0.086439	0.994442	1218	4	-0.4719	0.8298	0.84249	0.999611	13088	1	-0.4719
FBgn0029979	6	0.027969	0.086439	0.994442	1219	4	-0.64866	0.25434	0.44621	0.996647	6622	1	-0.64866
FBgn0053217	6	0.028004	0.086529	0.994442	1220	3	-0.44647	0.9632	0.96327	0.999611	15033	0	-0.44647
FBgn0052452	6	0.028046	0.086628	0.994442	1221	3	-0.42322	0.95269	0.95263	0.999611	14862	0	-0.42322
FBgn0031442	6	0.028072	0.086691	0.994442	1222	2	0.18699	0.10618	0.24454	0.995008	3593	2	0.18699
FBgn0034104	6	0.028083	0.086713	0.994442	1223	3	-0.12667	0.33606	0.52155	0.996647	7844	2	-0.12667
FBgn0266251	4	0.028151	0.072502	0.994442	1224	1	-0.13806	0.82372	0.8232	0.999611	13011	0	-0.13806
FBgn0003028	8	0.028251	0.097125	0.994442	1225	3	-0.15335	0.29477	0.5164	0.996647	7282	3	-0.15335
FBgn0267163	6	0.028263	0.087153	0.994442	1226	3	-0.2346	0.70692	0.77784	0.999611	11839	1	-0.2346
FBgn0267297	4	0.028299	0.0728	0.994442	1227	3	-0.32675	0.84134	0.84078	0.999611	13241	0	-0.32675
FBgn0031049	7	0.02833	0.096234	0.994442	1228	3	-0.34897	0.081301	0.21005	0.995008	3004	3	-0.34897
FBgn0038341	8	0.028403	0.097551	0.994442	1229	4	-0.30306	0.93262	0.93511	0.999611	14544	1	-0.30306
FBgn0030775	4	0.028407	0.07303	0.994442	1230	2	-0.61726	0.5409	0.60059	0.996647	10270	1	-0.61726
FBgn0031344	6	0.028431	0.087574	0.994442	1231	3	-0.19878	0.85686	0.86173	0.999611	13427	1	-0.19878
FBgn0265740	4	0.028491	0.07321	0.994442	1232	3	-0.53093	0.94865	0.9485	0.999611	14800	0	-0.53093
FBgn0028884	6	0.028516	0.087784	0.994442	1233	2	0.041387	0.9311	0.93092	0.999611	14524	0	0.041387
FBgn0034770	6	0.028571	0.087923	0.994442	1234	2	6.6542e-05	0.12947	0.27789	0.995008	4095	2	6.6542e-05
FBgn0266148	4	0.028621	0.073491	0.994442	1235	3	-0.79275	0.28971	0.42256	0.996647	7217	1	-0.79275
FBgn0039955	6	0.02864	0.088098	0.994442	1236	2	0.016885	0.55065	0.69133	0.996647	10396	1	0.016885
FBgn0036305	4	0.028651	0.073574	0.994442	1237	3	-0.39716	0.96804	0.96782	0.999611	15119	0	-0.39716
FBgn0262475	13	0.028659	0.11763	0.994442	1238	5	-0.82412	0.56663	0.80306	0.999611	10587	4	-0.82412
FBgn0265276	12	0.02868	0.11455	0.994442	1239	6	-0.18757	0.89505	0.95002	0.999611	13958	2	-0.18757
FBgn0015774	6	0.028735	0.088354	0.994442	1240	4	-0.26582	0.15597	0.31466	0.995008	4667	1	-0.26582
FBgn0051081	6	0.028742	0.08837	0.994442	1241	3	-0.11842	0.91391	0.91358	0.999611	14240	0	-0.11842
FBgn0039930	6	0.028745	0.088377	0.994442	1242	2	-0.1256	0.31363	0.50471	0.996647	7539	2	-0.1256
FBgn0037676	6	0.028745	0.088377	0.994442	1243	2	-0.077171	0.255	0.44711	0.996647	6633	2	-0.077171
FBgn0047038	6	0.0288	0.088523	0.994442	1244	3	-0.35382	0.82619	0.84005	0.999611	13051	1	-0.35382
FBgn0004895	6	0.028817	0.088567	0.994442	1245	3	-0.2413	0.91364	0.91334	0.999611	14238	0	-0.2413
FBgn0085487	6	0.028824	0.088583	0.994442	1246	4	-0.43131	0.94377	0.9436	0.999611	14724	0	-0.43131
FBgn0030222	3	0.028831	0.072765	0.994442	1247	2	-0.26414	0.31586	0.40115	0.995008	7578	1	-0.26414
FBgn0050464	6	0.028849	0.088645	0.994442	1248	4	-0.30977	0.69063	0.77121	0.999611	11711	1	-0.30977
FBgn0030711	6	0.028856	0.088665	0.994442	1249	3	-0.31246	0.17747	0.34427	0.995008	5111	2	-0.31246
FBgn0029942	6	0.028882	0.088722	0.994442	1250	3	-0.27631	0.93392	0.93377	0.999611	14568	0	-0.27631
FBgn0267917	4	0.028921	0.074178	0.994442	1251	3	-0.39018	0.98599	0.98598	0.999763	15410	0	-0.39018
FBgn0065092	4	0.028964	0.074267	0.994442	1252	2	-0.20013	0.92129	0.92094	0.999611	14345	0	-0.20013
FBgn0032219	4	0.029013	0.074367	0.994442	1253	3	-0.54149	0.98693	0.98694	0.999763	15423	0	-0.54149
FBgn0038531	6	0.029038	0.089128	0.994442	1254	2	0.1824	0.24767	0.43754	0.996647	6499	3	0.1824
FBgn0031258	6	0.029038	0.089128	0.994442	1255	4	-0.49648	0.98408	0.98413	0.999611	15378	0	-0.49648
FBgn0039137	8	0.029066	0.099376	0.994442	1256	3	-0.23881	0.14342	0.32692	0.995008	4408	1	-0.23881
FBgn0263236	6	0.029118	0.089297	0.994442	1257	4	-0.44894	0.9698	0.96992	0.999611	15146	0	-0.44894
FBgn0266147	4	0.029166	0.074699	0.994442	1258	3	-0.51285	0.28747	0.42002	0.996197	7186	1	-0.51285
FBgn0032514	4	0.029221	0.074822	0.994442	1259	1	0.21015	0.31458	0.45024	0.996647	7559	2	0.21015
FBgn0052507	6	0.029266	0.089673	0.994442	1260	2	-0.38657	0.4464	0.60666	0.996647	9156	1	-0.38657
FBgn0261556	6	0.029328	0.089822	0.994442	1261	2	0.27183	0.23828	0.42529	0.996647	6324	3	0.27183
FBgn0265267	5	0.029342	0.088066	0.994442	1262	3	-0.39538	0.88743	0.88777	0.999611	13837	0	-0.39538
FBgn0036156	6	0.029357	0.089894	0.994442	1263	4	-0.33772	0.84759	0.85482	0.999611	13313	1	-0.33772
FBgn0036522	6	0.029397	0.090007	0.994442	1264	3	-0.24642	0.1529	0.31043	0.995008	4602	2	-0.24642
FBgn0038307	6	0.029425	0.090077	0.994442	1265	2	-0.21403	0.50557	0.65405	0.996647	9845	2	-0.21403
FBgn0042179	6	0.029442	0.090118	0.994442	1266	3	-0.36681	0.62142	0.74536	0.999611	11186	1	-0.36681
FBgn0029795	6	0.029442	0.090118	0.994442	1267	3	-0.70136	0.027665	0.086413	0.990489	1272	2	-0.70136
FBgn0022027	6	0.029442	0.090118	0.994442	1268	4	-0.59554	0.80707	0.82805	0.999611	12814	1	-0.59554
FBgn0265101	6	0.029442	0.090118	0.994442	1269	3	-0.9996	0.99775	0.9977	0.999874	15583	0	-0.9996
FBgn0031031	6	0.029442	0.090118	0.994442	1270	4	-0.28664	0.34376	0.52738	0.996647	7947	2	-0.28664
FBgn0004584	4	0.029546	0.0755	0.994442	1271	1	0.70926	0.043686	0.10546	0.994904	1828	2	0.70926
FBgn0042098	6	0.029564	0.090421	0.994442	1272	2	0.12373	0.722	0.78435	0.999611	11968	1	0.12373
FBgn0265713	4	0.029594	0.07558	0.994442	1273	2	-0.4346	0.86064	0.86027	0.999611	13467	0	-0.4346
FBgn0052806	3	0.0296	0.073974	0.994442	1274	2	-0.23839	0.43376	0.47747	0.996647	8993	1	-0.23839
FBgn0031894	6	0.029604	0.090517	0.994442	1275	4	-0.41734	0.95521	0.95516	0.999611	14901	0	-0.41734
FBgn0026379	6	0.029604	0.090517	0.994442	1276	4	-0.46456	0.5346	0.67781	0.996647	10197	2	-0.46456
FBgn0264543	6	0.029682	0.090718	0.994442	1277	2	0.022075	0.79066	0.8184	0.999611	12634	1	0.022075
FBgn0037921	4	0.02971	0.07585	0.994442	1278	3	-0.64536	0.78771	0.78718	0.999611	12606	0	-0.64536
FBgn0030409	6	0.029717	0.090798	0.994442	1279	3	-0.25068	0.50982	0.6575	0.996647	9898	2	-0.25068
FBgn0004228	8	0.029722	0.1012	0.994442	1280	4	-0.34642	0.63824	0.78061	0.999611	11306	2	-0.34642
FBgn0034740	6	0.029733	0.090828	0.994442	1281	4	-0.51618	0.97389	0.97394	0.999611	15207	0	-0.51618
FBgn0051730	6	0.029753	0.090891	0.994442	1282	2	0.027288	0.87789	0.87894	0.999611	13719	1	0.027288
FBgn0004957	5	0.029765	0.08919	0.994442	1283	3	-0.26656	0.67516	0.72366	0.996911	11577	1	-0.26656
FBgn0038461	4	0.029788	0.076026	0.994442	1284	2	-0.91444	0.61818	0.64842	0.996647	11161	1	-0.91444
FBgn0000287	6	0.0298	0.091007	0.994442	1285	3	-0.31672	0.86313	0.86671	0.999611	13505	1	-0.31672
FBgn0033907	4	0.029872	0.076207	0.994442	1286	1	-0.42541	0.76039	0.76037	0.999611	12344	1	-0.42541
FBgn0035906	6	0.029907	0.091272	0.994442	1287	4	-0.60893	0.36019	0.53982	0.996647	8166	1	-0.60893
FBgn0052718	6	0.029907	0.091272	0.994442	1288	4	-0.47971	0.054009	0.14814	0.995008	2172	1	-0.47971
FBgn0029747	6	0.029927	0.091327	0.994442	1289	2	0.18429	0.19322	0.36557	0.995008	5425	3	0.18429
FBgn0034576	6	0.029927	0.091327	0.994442	1290	3	-0.26958	0.92972	0.92955	0.999611	14505	0	-0.26958
FBgn0265834	6	0.029954	0.091391	0.994442	1291	2	-0.25254	0.29549	0.49134	0.996647	7295	1	-0.25254
FBgn0028897	6	0.029966	0.091415	0.994442	1292	3	-0.014694	0.19607	0.36937	0.995008	5474	2	-0.014694
FBgn0001079	5	0.029971	0.089736	0.994442	1293	3	-0.33518	0.15506	0.30561	0.995008	4649	1	-0.33518
FBgn0039677	6	0.030031	0.09157	0.994442	1294	1	0.19955	0.084006	0.21223	0.995008	3067	3	0.19955
FBgn0029974	6	0.030066	0.091647	0.994442	1295	3	-0.26741	0.94101	0.94091	0.999611	14670	0	-0.26741
FBgn0019929	6	0.030066	0.091647	0.994442	1296	3	-0.38978	0.58318	0.71885	0.996911	10796	1	-0.38978
FBgn0035384	6	0.030101	0.091727	0.994442	1297	1	-0.016164	0.3375	0.52266	0.996647	7861	2	-0.016164
FBgn0034970	4	0.030111	0.076721	0.994442	1298	2	-0.57803	0.85481	0.85435	0.999611	13406	0	-0.57803
FBgn0035553	6	0.030198	0.091959	0.994442	1299	4	-0.88949	0.29993	0.49454	0.996647	7350	1	-0.88949
FBgn0031190	6	0.030199	0.091959	0.994442	1300	4	-0.21328	0.33944	0.52412	0.996647	7883	2	-0.21328
FBgn0038371	6	0.030205	0.09197	0.994442	1301	2	0.022069	0.4005	0.57083	0.996647	8630	1	0.022069
FBgn0035023	10	0.030302	0.11201	0.994442	1302	4	-0.25567	0.47278	0.70397	0.99676	9451	2	-0.25567
FBgn0032376	6	0.03031	0.092237	0.994442	1303	3	-0.30439	0.96269	0.96274	0.999611	15028	0	-0.30439
FBgn0023527	4	0.03036	0.077254	0.994442	1304	2	-0.28525	0.16337	0.28168	0.995008	4831	2	-0.28525
FBgn0261872	6	0.030361	0.092366	0.994442	1305	4	-0.26121	0.76238	0.80347	0.999611	12362	1	-0.26121
FBgn0029837	6	0.030379	0.092411	0.994442	1306	1	0.014779	0.43513	0.59796	0.996647	9007	2	0.014779
FBgn0031607	6	0.030401	0.092469	0.994442	1307	3	-0.36054	0.16809	0.33133	0.995008	4921	1	-0.36054
FBgn0035286	6	0.030424	0.092528	0.994442	1308	3	-0.47058	0.86064	0.86468	0.999611	13470	1	-0.47058
FBgn0032886	5	0.030464	0.091041	0.994442	1309	3	-0.46316	0.92928	0.92948	0.999611	14497	0	-0.46316
FBgn0034394	6	0.030546	0.092845	0.994442	1310	4	-0.2822	0.44588	0.60622	0.996647	9149	1	-0.2822
FBgn0034091	8	0.030571	0.10361	0.994442	1311	2	0.61917	0.004777	0.022064	0.980433	291	5	0.61917
FBgn0016684	6	0.030627	0.093034	0.994442	1312	3	-0.025865	0.039032	0.11366	0.995008	1685	3	-0.025865
FBgn0085257	6	0.030663	0.093124	0.994442	1313	2	0.1781	0.3292	0.51644	0.996647	7764	2	0.1781
FBgn0000307	2	0.030856	0.056208	0.994442	1314	2	-1.8245	0.96914	0.96912	0.999611	15135	0	-1.8245
FBgn0030659	5	0.030856	0.09211	0.994442	1315	2	0.42559	0.0086912	0.030306	0.980433	485	3	0.42559
FBgn0032646	4	0.030871	0.078321	0.994442	1316	2	-0.3964	0.87318	0.87278	0.999611	13629	0	-0.3964
FBgn0036732	6	0.030881	0.093608	0.994442	1317	4	-0.45141	0.030796	0.094096	0.990489	1398	1	-0.45141
FBgn0038783	6	0.0309	0.093643	0.994442	1318	3	-0.52945	0.98742	0.98744	0.999763	15432	0	-0.52945
FBgn0004052	6	0.031004	0.093872	0.994442	1319	2	-0.18393	0.94953	0.9494	0.999611	14812	0	-0.18393
FBgn0264383	4	0.031033	0.078672	0.994442	1320	2	-0.26133	0.91138	0.91111	0.999611	14205	0	-0.26133
FBgn0260755	3	0.031067	0.076056	0.994442	1321	1	0.32597	0.23001	0.34853	0.995008	6152	2	0.32597
FBgn0029989	6	0.031074	0.094036	0.994442	1322	2	0.048155	0.079922	0.20491	0.995008	2959	2	0.048155
FBgn0033628	6	0.031143	0.094204	0.994442	1323	2	-0.06157	0.49152	0.64266	0.996647	9678	2	-0.06157
FBgn0031471	4	0.031172	0.078982	0.994442	1324	1	0.32296	0.34063	0.47929	0.996647	7902	2	0.32296
FBgn0032634	6	0.031194	0.094303	0.994442	1325	4	-0.45947	0.65678	0.75804	0.999611	11446	1	-0.45947
FBgn0266051	4	0.031244	0.079123	0.994442	1326	3	-0.36546	0.97864	0.97859	0.999611	15273	0	-0.36546
FBgn0031493	4	0.031244	0.079123	0.994442	1327	3	-0.61904	0.6583	0.6762	0.996647	11458	1	-0.61904
FBgn0038586	4	0.031265	0.079167	0.994442	1328	1	0.11486	0.26148	0.39113	0.995008	6766	2	0.11486
FBgn0031562	6	0.031282	0.094514	0.994442	1329	1	-0.16209	0.31017	0.50217	0.996647	7496	1	-0.16209
FBgn0283450	6	0.031304	0.094562	0.994442	1330	4	-0.56065	0.46513	0.62158	0.996647	9364	2	-0.56065
FBgn0266405	4	0.031312	0.079259	0.994442	1331	2	-0.14198	0.39205	0.5236	0.996647	8542	1	-0.14198
FBgn0001145	6	0.03133	0.094625	0.994442	1332	2	0.081743	0.48594	0.63821	0.996647	9599	2	0.081743
FBgn0039034	6	0.031366	0.094713	0.994442	1333	4	-0.3988	0.92575	0.92561	0.999611	14443	0	-0.3988
FBgn0265061	4	0.031404	0.079469	0.994442	1334	1	0.24612	0.1321	0.24646	0.995008	4151	2	0.24612
FBgn0037848	6	0.031421	0.094844	0.994442	1335	1	0.20004	0.038827	0.11317	0.995008	1675	2	0.20004
FBgn0031910	6	0.031421	0.094844	0.994442	1336	2	-0.13831	0.45774	0.61567	0.996647	9291	2	-0.13831
FBgn0040931	6	0.031438	0.094881	0.994442	1337	4	-0.7181	0.99617	0.99617	0.999874	15556	0	-0.7181
FBgn0037549	6	0.031572	0.095215	0.994442	1338	4	-0.71824	0.9662	0.96627	0.999611	15090	0	-0.71824
FBgn0029999	5	0.031578	0.094017	0.994442	1339	2	-0.13889	0.21613	0.37749	0.995008	5886	1	-0.13889
FBgn0031940	6	0.031588	0.095254	0.994442	1340	3	-0.38963	0.80302	0.82562	0.999611	12759	1	-0.38963
FBgn0051952	6	0.031588	0.095254	0.994442	1341	3	-0.20463	0.77314	0.809	0.999611	12451	1	-0.20463
FBgn0029672	6	0.031588	0.095254	0.994442	1342	3	-0.26615	0.075021	0.19445	0.995008	2811	2	-0.26615
FBgn0037985	6	0.031601	0.095292	0.994442	1343	2	0.28318	0.052355	0.14431	0.995008	2117	3	0.28318
FBgn0027359	6	0.031601	0.095292	0.994442	1344	2	-0.47167	0.13977	0.29227	0.995008	4329	2	-0.47167
FBgn0039937	6	0.031698	0.095515	0.994442	1345	4	-0.34057	0.0039513	0.016712	0.980433	238	1	-0.34057
FBgn0035272	6	0.031699	0.095517	0.994442	1346	2	0.30349	0.067067	0.17721	0.995008	2584	4	0.30349
FBgn0265842	4	0.031799	0.080261	0.994442	1347	1	-0.15481	0.4505	0.55201	0.996647	9200	1	-0.15481
FBgn0037654	6	0.031852	0.095894	0.994442	1348	2	-0.053022	0.085065	0.21377	0.995008	3093	3	-0.053022
FBgn0050375	6	0.031852	0.095894	0.994442	1349	2	-0.075243	0.88057	0.8813	0.999611	13748	1	-0.075243
FBgn0035689	4	0.031905	0.080475	0.994442	1350	3	-1.2568	0.44255	0.54798	0.996647	9103	1	-1.2568
FBgn0265427	4	0.031915	0.080503	0.994442	1351	1	-0.050801	0.64324	0.66559	0.996647	11342	1	-0.050801
FBgn0032517	6	0.031976	0.096217	0.994442	1352	2	0.025849	0.55006	0.69084	0.996647	10385	1	0.025849
FBgn0027496	6	0.032065	0.096429	0.994442	1353	4	-0.35311	0.20256	0.37821	0.995008	5622	1	-0.35311
FBgn0037293	6	0.032139	0.096611	0.994442	1354	3	-0.27641	0.22084	0.40229	0.995008	5986	2	-0.27641
FBgn0028476	6	0.032185	0.096729	0.994442	1355	2	-0.11502	0.19107	0.36265	0.995008	5378	2	-0.11502
FBgn0260959	6	0.032185	0.096729	0.994442	1356	3	-0.18614	0.0073581	0.029205	0.980433	420	1	-0.18614
FBgn0262739	8	0.032198	0.10807	0.994442	1357	2	0.010942	0.29713	0.51864	0.996647	7318	3	0.010942
FBgn0020224	6	0.032206	0.096779	0.994442	1358	3	-0.44613	0.83865	0.84859	0.999611	13208	1	-0.44613
FBgn0265265	6	0.032206	0.096779	0.994442	1359	3	-0.55134	0.59075	0.72535	0.996911	10899	2	-0.55134
FBgn0021895	4	0.03224	0.081195	0.994442	1360	1	-0.18748	0.79135	0.79079	0.999611	12639	0	-0.18748
FBgn0025355	1	0.032251	0.0322	0.994442	1361	1	-1.5525	0.96775	0.96802	0.999611	15115	0	-1.5525
FBgn0266005	4	0.032304	0.08132	0.994442	1362	3	-0.60357	0.82785	0.82735	0.999611	13065	0	-0.60357
FBgn0040679	6	0.032323	0.097061	0.994442	1363	1	0.46176	0.010955	0.041933	0.98853	605	4	0.46176
FBgn0035374	5	0.032341	0.096001	0.994442	1364	3	-0.46221	0.44006	0.586	0.996647	9067	1	-0.46221
FBgn0265734	4	0.032356	0.08143	0.994442	1365	2	-0.38656	0.96307	0.96282	0.999611	15032	0	-0.38656
FBgn0030871	4	0.032425	0.081577	0.994442	1366	2	-0.18912	0.61452	0.64595	0.996647	11133	1	-0.18912
FBgn0035552	6	0.032462	0.097417	0.994442	1367	2	-0.088346	0.27345	0.47081	0.996647	6978	2	-0.088346
FBgn0036817	6	0.032462	0.097417	0.994442	1368	4	-0.21649	0.87006	0.87234	0.999611	13597	1	-0.21649
FBgn0034262	6	0.032518	0.097554	0.994442	1369	4	-0.62563	0.72981	0.78785	0.999611	12027	1	-0.62563
FBgn0032702	4	0.032552	0.081844	0.994442	1370	3	-0.78723	0.41658	0.53527	0.996647	8817	1	-0.78723
FBgn0029754	4	0.032564	0.081871	0.994442	1371	2	0.78239	0.0006255	0.0022413	0.980433	41	2	0.78239
FBgn0261609	6	0.032565	0.097675	0.994442	1372	2	0.52446	0.032373	0.097853	0.990489	1448	4	0.52446
FBgn0041174	6	0.032595	0.097739	0.994442	1373	3	-0.39873	0.89196	0.89186	0.999611	13909	1	-0.39873
FBgn0036839	6	0.032601	0.09775	0.994442	1374	3	-0.23416	0.9941	0.99409	0.999874	15528	0	-0.23416
FBgn0085241	2	0.032626	0.059319	0.994442	1375	2	-0.54953	0.96737	0.96733	0.999611	15111	0	-0.54953
FBgn0250844	6	0.032659	0.097875	0.994442	1376	3	-0.10668	0.076235	0.1971	0.995008	2858	2	-0.10668
FBgn0053964	1	0.032673	0.032631	0.994442	1377	1	-1.3878	0.96733	0.96761	0.999611	15109	0	-1.3878
FBgn0265152	4	0.03268	0.082114	0.994442	1378	1	0.15018	0.1079	0.21937	0.995008	3629	2	0.15018
FBgn0050110	6	0.032689	0.097952	0.994442	1379	4	-0.23685	0.20983	0.38776	0.995008	5763	1	-0.23685
FBgn0052549	6	0.032695	0.097969	0.994442	1380	2	0.10697	0.094386	0.22743	0.995008	3358	3	0.10697
FBgn0031504	6	0.032695	0.097969	0.994442	1381	4	-0.54151	0.3027	0.4966	0.996647	7392	2	-0.54151
FBgn0265841	4	0.03272	0.082199	0.994442	1382	3	-0.81341	0.56762	0.61636	0.996647	10597	1	-0.81341
FBgn0266619	4	0.032773	0.082306	0.994442	1383	1	-0.019596	0.54045	0.60035	0.996647	10267	1	-0.019596
FBgn0050495	6	0.032809	0.098249	0.994442	1384	1	0.42712	0.0521	0.14375	0.995008	2100	4	0.42712
FBgn0085440	6	0.032878	0.098409	0.994442	1385	2	0.028273	0.028849	0.089359	0.990489	1323	2	0.028273
FBgn0030365	6	0.032929	0.098536	0.994442	1386	4	-0.42747	0.34376	0.52738	0.996647	7946	2	-0.42747
FBgn0030030	6	0.032948	0.098581	0.994442	1387	1	-0.094234	0.92314	0.92291	0.999611	14383	0	-0.094234
FBgn0052203	6	0.033023	0.098759	0.994442	1388	4	-0.47777	0.86349	0.867	0.999611	13509	1	-0.47777
FBgn0262482	6	0.033023	0.098759	0.994442	1389	4	-0.63078	0.45519	0.6137	0.996647	9258	2	-0.63078
FBgn0033767	4	0.033028	0.082864	0.994442	1390	2	-0.094323	0.091528	0.19871	0.995008	3272	2	-0.094323
FBgn0262486	6	0.033052	0.098828	0.994442	1391	3	-0.64332	0.7435	0.79424	0.999611	12166	1	-0.64332
FBgn0052451	10	0.033073	0.12024	0.994442	1392	3	-0.17102	0.452	0.68978	0.996647	9221	2	-0.17102
FBgn0032088	6	0.03309	0.098915	0.994442	1393	4	-0.47412	0.18059	0.34849	0.995008	5163	2	-0.47412
FBgn0043471	6	0.033156	0.099051	0.994442	1394	3	-0.27095	0.3547	0.53563	0.996647	8093	2	-0.27095
FBgn0267472	4	0.033157	0.083116	0.994442	1395	3	-0.6058	0.9796	0.97956	0.999611	15287	0	-0.6058
FBgn0029524	6	0.03316	0.09906	0.994442	1396	3	-0.21054	0.18687	0.35698	0.995008	5284	2	-0.21054
FBgn0040001	6	0.03316	0.09906	0.994442	1397	4	-0.53201	0.68355	0.76839	0.999611	11649	1	-0.53201
FBgn0000409	6	0.03316	0.09906	0.994442	1398	3	-0.43224	0.73611	0.79079	0.999611	12085	1	-0.43224
FBgn0038909	6	0.03322	0.099212	0.994442	1399	4	-0.30718	0.077838	0.20044	0.995008	2912	2	-0.30718
FBgn0032294	4	0.033234	0.083272	0.994442	1400	3	-0.97382	0.99067	0.99071	0.999763	15480	0	-0.97382
FBgn0032520	5	0.03333	0.098643	0.994442	1401	2	-0.18434	0.092029	0.20333	0.995008	3283	1	-0.18434
FBgn0265805	4	0.033333	0.083487	0.994442	1402	2	-0.32422	0.59784	0.63522	0.996647	10984	1	-0.32422
FBgn0013764	4	0.033352	0.083526	0.994442	1403	1	0.0027255	0.26654	0.39681	0.995008	6846	1	0.0027255
FBgn0030723	6	0.033364	0.099555	0.994442	1404	2	-0.31109	0.81783	0.83466	0.999611	12933	1	-0.31109
FBgn0037901	4	0.033381	0.083595	0.994442	1405	2	-0.26284	0.88909	0.88859	0.999611	13864	0	-0.26284
FBgn0030790	6	0.033396	0.099625	0.994442	1406	4	-0.49191	0.99768	0.99764	0.999874	15581	0	-0.49191
FBgn0052521	6	0.033433	0.099717	0.994442	1407	2	0.21231	0.077763	0.20028	0.995008	2911	4	0.21231
FBgn0036843	4	0.033508	0.083872	0.994442	1408	3	-0.39264	0.9432	0.94299	0.999611	14711	0	-0.39264
FBgn0266898	4	0.033515	0.083883	0.994442	1409	3	-0.48004	0.95303	0.95284	0.999611	14870	0	-0.48004
FBgn0038078	6	0.033563	0.10005	0.994442	1410	4	-0.35907	0.99352	0.99352	0.999874	15517	0	-0.35907
FBgn0025790	6	0.033563	0.10005	0.994442	1411	3	-0.74794	0.75713	0.80081	0.999611	12314	1	-0.74794
FBgn0011569	6	0.033572	0.10007	0.994442	1412	2	0.29019	0.22095	0.40245	0.995008	5991	3	0.29019
FBgn0015799	6	0.033634	0.10023	0.994442	1413	4	-0.44647	0.69518	0.77301	0.999611	11751	1	-0.44647
FBgn0036782	6	0.033634	0.10023	0.994442	1414	4	-0.81433	0.99314	0.99316	0.999874	15512	0	-0.81433
FBgn0041097	6	0.033641	0.10024	0.994442	1415	1	-0.11409	0.9149	0.91456	0.999611	14256	0	-0.11409
FBgn0039595	5	0.033678	0.099387	0.994442	1416	3	-0.58419	0.82458	0.82629	0.999611	13030	1	-0.58419
FBgn0264922	6	0.03371	0.1004	0.994442	1417	2	-0.11036	0.13039	0.27917	0.995008	4121	1	-0.11036
FBgn0029800	3	0.033735	0.079979	0.994442	1418	2	-0.9996	0.96997	0.97014	0.999611	15153	0	-0.9996
FBgn0036203	6	0.03378	0.10058	0.994442	1419	2	-0.090935	0.48011	0.63348	0.996647	9536	2	-0.090935
FBgn0262685	5	0.033793	0.099582	0.994442	1420	1	0.324	0.35018	0.50128	0.996647	8043	2	0.324
FBgn0260767	5	0.033793	0.099582	0.994442	1421	3	-0.71128	0.98388	0.98398	0.999611	15377	0	-0.71128
FBgn0031143	6	0.033839	0.10072	0.994442	1422	4	-0.49894	0.2805	0.4799	0.996647	7095	1	-0.49894
FBgn0039835	6	0.033843	0.10073	0.994442	1423	4	-0.58131	0.56983	0.70743	0.99676	10613	1	-0.58131
FBgn0038055	6	0.033843	0.10073	0.994442	1424	2	-0.1137	0.042513	0.12177	0.995008	1785	2	-0.1137
FBgn0265902	4	0.033864	0.084627	0.994442	1425	2	-0.12267	0.05666	0.13154	0.995008	2255	2	-0.12267
FBgn0030369	6	0.033896	0.10087	0.994442	1426	3	-0.29904	0.9012	0.90099	0.999611	14051	0	-0.29904
FBgn0016032	6	0.03392	0.10092	0.994442	1427	4	-0.38862	0.99517	0.99519	0.999874	15543	0	-0.38862
FBgn0037491	4	0.033984	0.084876	0.994442	1428	2	-0.24347	0.76374	0.76351	0.999611	12377	1	-0.24347
FBgn0034076	6	0.034022	0.10116	0.994442	1429	2	-0.34325	0.57429	0.71126	0.996911	10677	2	-0.34325
FBgn0028871	5	0.034053	0.10006	0.994442	1430	1	0.13136	0.2501	0.40869	0.995594	6537	1	0.13136
FBgn0025682	6	0.034068	0.10128	0.994442	1431	3	-0.011273	0.21219	0.39088	0.995008	5810	3	-0.011273
FBgn0038373	6	0.034071	0.10128	0.994442	1432	2	-0.21643	0.49748	0.64751	0.996647	9752	2	-0.21643
FBgn0261568	6	0.034126	0.10142	0.994442	1433	2	0.45771	0.011855	0.045091	0.98853	656	4	0.45771
FBgn0036240	6	0.034158	0.1015	0.994442	1434	4	-0.51421	0.15736	0.31658	0.995008	4702	2	-0.51421
FBgn0040941	6	0.034158	0.10151	0.994442	1435	4	-0.52811	0.88106	0.88175	0.999611	13753	1	-0.52811
FBgn0267978	8	0.034167	0.1134	0.994442	1436	5	-0.35989	0.98845	0.98836	0.999763	15444	0	-0.35989
FBgn0267011	4	0.03421	0.085367	0.994442	1437	2	-0.38908	0.7593	0.75933	0.999611	12335	1	-0.38908
FBgn0016031	7	0.034262	0.11175	0.994442	1438	2	0.1392	0.19818	0.39006	0.995008	5527	3	0.1392
FBgn0037998	6	0.034265	0.10177	0.994442	1439	3	-0.055544	0.25059	0.44144	0.996647	6551	2	-0.055544
FBgn0036945	6	0.034334	0.10194	0.994442	1440	2	0.0099665	0.064195	0.17099	0.995008	2490	3	0.0099665
FBgn0266569	6	0.034338	0.10195	0.994442	1441	3	-0.16419	0.87789	0.87894	0.999611	13703	1	-0.16419
FBgn0038147	6	0.034417	0.10215	0.994442	1442	4	-0.51035	0.39447	0.56619	0.996647	8571	1	-0.51035
FBgn0005592	6	0.034417	0.10215	0.994442	1443	4	-0.24888	0.91993	0.91961	0.999611	14328	0	-0.24888
FBgn0038565	6	0.034472	0.10228	0.994442	1444	3	-0.465	0.3902	0.56289	0.996647	8514	2	-0.465
FBgn0266722	5	0.034515	0.10093	0.994442	1445	1	0.044795	0.13939	0.28077	0.995008	4319	2	0.044795
FBgn0031093	6	0.03452	0.10241	0.994442	1446	4	-0.32841	0.93449	0.93434	0.999611	14576	0	-0.32841
FBgn0035977	6	0.03452	0.10241	0.994442	1447	4	-0.54351	0.99369	0.9937	0.999874	15520	0	-0.54351
FBgn0259150	6	0.034542	0.10246	0.994442	1448	2	0.1568	0.1902	0.36149	0.995008	5362	2	0.1568
FBgn0264790	4	0.034567	0.086095	0.994442	1449	3	-0.54808	0.017498	0.049845	0.98853	887	1	-0.54808
FBgn0034440	6	0.034604	0.1026	0.994442	1450	2	-0.053223	0.63642	0.75065	0.999611	11291	1	-0.053223
FBgn0034681	6	0.034611	0.10262	0.994442	1451	2	-0.41936	0.55437	0.69442	0.996647	10449	2	-0.41936
FBgn0035057	6	0.034634	0.10268	0.994442	1452	3	-0.31085	0.7053	0.77714	0.999611	11826	1	-0.31085
FBgn0267687	4	0.034673	0.086297	0.994442	1453	1	0.081279	0.0011465	0.0041123	0.980433	74	2	0.081279
FBgn0265381	4	0.034673	0.086297	0.994442	1454	1	-0.029209	0.80503	0.80451	0.999611	12783	0	-0.029209
FBgn0039830	7	0.034713	0.11272	0.994442	1455	3	-0.24439	0.093984	0.23439	0.995008	3344	1	-0.24439
FBgn0086558	5	0.034718	0.10129	0.994442	1456	1	0.47466	0.008735	0.03044	0.980433	488	3	0.47466
FBgn0262530	6	0.034749	0.10294	0.994442	1457	3	-0.49864	0.91744	0.9171	0.999611	14286	0	-0.49864
FBgn0265048	6	0.034764	0.10298	0.994442	1458	4	-0.32214	0.9198	0.91948	0.999611	14325	0	-0.32214
FBgn0052581	3	0.034769	0.08148	0.994442	1459	2	-0.57863	0.92743	0.92757	0.999611	14465	0	-0.57863
FBgn0266207	4	0.034775	0.086506	0.994442	1460	2	-0.34508	0.55728	0.61021	0.996647	10484	1	-0.34508
FBgn0036999	6	0.034811	0.10308	0.994442	1461	4	-0.32074	0.2805	0.4799	0.996647	7093	2	-0.32074
FBgn0038490	5	0.034833	0.10149	0.994442	1462	2	0.46814	0.060292	0.14931	0.995008	2379	3	0.46814
FBgn0262598	3	0.034833	0.081589	0.994442	1463	1	0.087194	0.29102	0.38627	0.995008	7235	1	0.087194
FBgn0267982	4	0.034835	0.086627	0.994442	1464	3	-0.79763	0.99067	0.99071	0.999763	15479	0	-0.79763
FBgn0039342	6	0.034857	0.1032	0.994442	1465	2	-0.12875	0.1606	0.32111	0.995008	4774	1	-0.12875
FBgn0039178	6	0.034922	0.10336	0.994442	1466	3	-0.1983	0.98261	0.98262	0.999611	15353	0	-0.1983
FBgn0033815	6	0.034928	0.10337	0.994442	1467	4	-0.72577	0.92791	0.92772	0.999611	14470	0	-0.72577
FBgn0262636	8	0.034966	0.11557	0.994442	1468	3	-0.26196	0.16656	0.36314	0.995008	4898	2	-0.26196
FBgn0010411	4	0.034997	0.086956	0.994442	1469	2	-0.028103	0.37069	0.51247	0.996647	8275	2	-0.028103
FBgn0035761	4	0.035016	0.086996	0.994442	1470	3	-1.0889	0.88348	0.88304	0.999611	13786	0	-1.0889
FBgn0267695	4	0.035089	0.087149	0.994442	1471	2	-0.35777	0.97996	0.97994	0.999611	15302	0	-0.35777
FBgn0267686	4	0.035104	0.087174	0.994442	1472	3	-0.28376	0.87121	0.8708	0.999611	13610	0	-0.28376
FBgn0036804	6	0.035123	0.10383	0.994442	1473	3	-1.046	0.94282	0.94269	0.999611	14702	0	-1.046
FBgn0010414	6	0.035201	0.104	0.994442	1474	3	-0.49394	0.33962	0.52426	0.996647	7889	1	-0.49394
FBgn0032870	6	0.035201	0.104	0.994442	1475	3	-0.16498	0.36604	0.54429	0.996647	8221	1	-0.16498
FBgn0004581	6	0.035269	0.10417	0.994442	1476	2	-0.37629	0.064379	0.17138	0.995008	2496	2	-0.37629
FBgn0265342	6	0.035269	0.10417	0.994442	1477	4	-0.48616	0.37624	0.55211	0.996647	8344	1	-0.48616
FBgn0001970	6	0.035326	0.10432	0.994442	1478	4	-0.33308	0.2941	0.49031	0.996647	7265	2	-0.33308
FBgn0046692	6	0.035365	0.10441	0.994442	1479	4	-0.39962	0.42666	0.59122	0.996647	8925	2	-0.39962
FBgn0014033	6	0.03544	0.10458	0.994442	1480	2	-0.50567	0.87162	0.87359	0.999611	13613	1	-0.50567
FBgn0033214	6	0.035442	0.10458	0.994442	1481	2	-0.13596	0.80537	0.82702	0.999611	12793	1	-0.13596
FBgn0262107	4	0.035463	0.087999	0.994442	1482	3	-0.81851	0.55274	0.60756	0.996647	10430	1	-0.81851
FBgn0267616	4	0.035486	0.088045	0.994442	1483	2	-0.44263	0.91512	0.91484	0.999611	14259	0	-0.44263
FBgn0030616	6	0.035498	0.10472	0.994442	1484	4	-0.40117	0.077358	0.1994	0.995008	2892	1	-0.40117
FBgn0037543	6	0.035498	0.10472	0.994442	1485	4	-0.50289	0.5019	0.65104	0.996647	9794	2	-0.50289
FBgn0000337	6	0.035498	0.10472	0.994442	1486	4	-0.53498	0.96749	0.96756	0.999611	15112	0	-0.53498
FBgn0030697	6	0.035498	0.10472	0.994442	1487	4	-0.3867	0.64794	0.75472	0.999611	11378	1	-0.3867
FBgn0030348	6	0.03558	0.10493	0.994442	1488	2	0.34856	0.16484	0.32687	0.995008	4870	3	0.34856
FBgn0024945	6	0.035591	0.10496	0.994442	1489	3	-0.22491	0.70014	0.77504	0.999611	11785	1	-0.22491
FBgn0037621	4	0.035604	0.088277	0.994442	1490	2	-0.47492	0.94669	0.94648	0.999611	14770	0	-0.47492
FBgn0035034	6	0.035684	0.10519	0.994442	1491	3	-0.67599	0.93745	0.93739	0.999611	14622	0	-0.67599
FBgn0033955	6	0.035684	0.10519	0.994442	1492	2	-0.15894	0.95291	0.95283	0.999611	14866	0	-0.15894
FBgn0264727	2	0.03575	0.064701	0.994442	1493	2	-0.50278	0.96425	0.96422	0.999611	15058	0	-0.50278
FBgn0034940	4	0.035754	0.088593	0.994442	1494	3	-0.85881	0.53884	0.59948	0.996647	10248	1	-0.85881
FBgn0265082	6	0.035788	0.10544	0.994442	1495	2	-0.025701	0.85627	0.86127	0.999611	13425	1	-0.025701
FBgn0033869	6	0.035864	0.10563	0.994442	1496	4	-0.44876	0.48972	0.6412	0.996647	9650	1	-0.44876
FBgn0033186	6	0.035864	0.10563	0.994442	1497	4	-0.4455	0.99169	0.99174	0.999874	15499	0	-0.4455
FBgn0034131	6	0.035877	0.10565	0.994442	1498	2	-0.29782	0.23287	0.41816	0.996165	6203	2	-0.29782
FBgn0267085	4	0.035883	0.088875	0.994442	1499	2	-0.19524	0.077135	0.17172	0.995008	2881	2	-0.19524
FBgn0259204	3	0.035984	0.083256	0.994442	1500	2	-1.0606	0.83055	0.8302	0.999611	13100	0	-1.0606
FBgn0036757	6	0.035995	0.10594	0.994442	1501	4	-0.46476	0.2778	0.4765	0.996647	7054	2	-0.46476
FBgn0052071	6	0.036031	0.10602	0.994442	1502	4	-0.30028	0.93284	0.93266	0.999611	14546	0	-0.30028
FBgn0034126	6	0.036064	0.1061	0.994442	1503	3	-0.24766	0.58788	0.72286	0.996911	10854	1	-0.24766
FBgn0033374	1	0.036072	0.036013	0.994442	1504	1	-1.239	0.96393	0.96422	0.999611	15050	0	-1.239
FBgn0037724	6	0.036081	0.10614	0.994442	1505	3	-0.34823	0.72557	0.78593	0.999611	11995	1	-0.34823
FBgn0040257	6	0.036096	0.10618	0.994442	1506	3	-0.54477	0.73889	0.79205	0.999611	12114	1	-0.54477
FBgn0031853	6	0.036096	0.10618	0.994442	1507	4	-0.43755	0.98145	0.98148	0.999611	15331	0	-0.43755
FBgn0052447	6	0.036133	0.10626	0.994442	1508	1	0.28139	0.03088	0.094283	0.990489	1403	4	0.28139
FBgn0266981	4	0.036223	0.089589	0.994442	1509	2	-1.0568	0.9605	0.96029	0.999611	14990	0	-1.0568
FBgn0259975	6	0.036232	0.10649	0.994442	1510	3	-0.37972	0.19878	0.37307	0.995008	5546	1	-0.37972
FBgn0031176	6	0.036237	0.1065	0.994442	1511	2	0.10298	0.43476	0.59768	0.996647	9001	2	0.10298
FBgn0058191	6	0.036341	0.10674	0.994442	1512	3	-0.062739	0.27144	0.46825	0.996647	6933	2	-0.062739
FBgn0034774	6	0.036353	0.10676	0.994442	1513	2	-0.17215	0.16397	0.32573	0.995008	4853	2	-0.17215
FBgn0027655	6	0.036376	0.10681	0.994442	1514	3	-0.24796	0.89343	0.89328	0.999611	13934	1	-0.24796
FBgn0004618	4	0.036395	0.089941	0.994442	1515	3	-0.43869	0.34814	0.4876	0.996647	8021	1	-0.43869
FBgn0054044	4	0.0365	0.090176	0.994442	1516	1	0.046734	0.21503	0.3396	0.995008	5861	1	0.046734
FBgn0264301	6	0.03652	0.10715	0.994442	1517	3	-0.065524	0.00021392	0.0011756	0.835059	19	3	-0.065524
FBgn0259164	6	0.036548	0.10722	0.994442	1518	3	-0.097905	0.16279	0.32408	0.995008	4817	3	-0.097905
FBgn0261479	4	0.036599	0.090387	0.994442	1519	2	-0.79379	0.21958	0.34467	0.995008	5968	1	-0.79379
FBgn0259956	6	0.036604	0.10735	0.994442	1520	4	-0.47821	0.85723	0.86203	0.999611	13433	1	-0.47821
FBgn0051477	6	0.036617	0.10739	0.994442	1521	2	0.35226	0.10445	0.24211	0.995008	3565	3	0.35226
FBgn0039277	6	0.036664	0.10751	0.994442	1522	3	-0.26741	0.48932	0.64088	0.996647	9642	1	-0.26741
FBgn0039070	6	0.036688	0.10757	0.994442	1523	3	-0.24085	0.91039	0.91009	0.999611	14185	0	-0.24085
FBgn0039590	6	0.036688	0.10757	0.994442	1524	2	-0.034429	0.23371	0.41927	0.996197	6231	3	-0.034429
FBgn0033058	4	0.036719	0.090615	0.994442	1525	2	0.10262	0.063775	0.14568	0.995008	2482	2	0.10262
FBgn0266904	2	0.036761	0.066477	0.994442	1526	1	0.12809	0.091191	0.15638	0.995008	3263	1	0.12809
FBgn0024361	7	0.03677	0.11725	0.994442	1527	4	-0.35536	0.15963	0.3449	0.995008	4752	2	-0.35536
FBgn0033696	4	0.036818	0.090805	0.994442	1528	3	-0.54892	0.69769	0.70594	0.99676	11760	1	-0.54892
FBgn0037183	6	0.036825	0.1079	0.994442	1529	3	-0.29266	0.0821	0.20943	0.995008	3025	3	-0.29266
FBgn0243511	6	0.036855	0.10796	0.994442	1530	2	-0.10769	0.79467	0.82072	0.999611	12673	1	-0.10769
FBgn0052056	7	0.036933	0.1176	0.994442	1531	3	0.11747	0.13843	0.31606	0.995008	4299	3	0.11747
FBgn0029817	5	0.03694	0.10538	0.994442	1532	1	0.029615	0.33171	0.48402	0.996647	7794	1	0.029615
FBgn0053349	6	0.036963	0.10822	0.994442	1533	2	-0.29974	0.81506	0.8329	0.999611	12902	1	-0.29974
FBgn0011722	6	0.036993	0.10829	0.994442	1534	4	-0.57493	0.90493	0.90465	0.999611	14115	0	-0.57493
FBgn0050000	6	0.036993	0.10829	0.994442	1535	4	-0.48071	0.4732	0.62797	0.996647	9459	1	-0.48071
FBgn0001259	4	0.037032	0.091244	0.994442	1536	1	0.53985	0.0059531	0.020486	0.980433	339	2	0.53985
FBgn0039031	6	0.037032	0.10838	0.994442	1537	2	0.52844	0.0059784	0.024247	0.980433	340	4	0.52844
FBgn0037712	6	0.037046	0.10841	0.994442	1538	2	-0.41548	0.30967	0.5018	0.996647	7487	2	-0.41548
FBgn0029514	6	0.037223	0.1088	0.994442	1539	4	-0.57045	0.67491	0.76501	0.999611	11575	1	-0.57045
FBgn0050148	6	0.037239	0.10885	0.994442	1540	2	-0.14903	0.58642	0.7216	0.996911	10839	1	-0.14903
FBgn0267160	4	0.03724	0.091696	0.994442	1541	2	-0.32542	0.70795	0.71422	0.996911	11853	1	-0.32542
FBgn0037846	6	0.037242	0.10885	0.994442	1542	3	-0.29687	0.59387	0.72804	0.997904	10938	2	-0.29687
FBgn0259168	6	0.037242	0.10885	0.994442	1543	3	-0.27366	0.69044	0.77113	0.999611	11710	1	-0.27366
FBgn0036911	3	0.037272	0.085087	0.994442	1544	2	-0.36956	0.94308	0.94331	0.999611	14706	0	-0.36956
FBgn0261456	6	0.037308	0.109	0.994442	1545	3	-0.33849	0.15937	0.31939	0.995008	4745	1	-0.33849
FBgn0038597	6	0.037345	0.10909	0.994442	1546	3	-0.09875	0.67697	0.76579	0.999611	11591	1	-0.09875
FBgn0266045	8	0.037368	0.12188	0.994442	1547	5	-0.42822	0.68208	0.80739	0.999611	11630	2	-0.42822
FBgn0283531	6	0.037429	0.10928	0.994442	1548	2	-0.056298	0.89507	0.89488	0.999611	13960	1	-0.056298
FBgn0026722	6	0.037481	0.1094	0.994442	1549	2	-0.0096348	0.16055	0.32104	0.995008	4772	2	-0.0096348
FBgn0259994	6	0.037482	0.1094	0.994442	1550	4	-0.31616	0.13965	0.2921	0.995008	4326	1	-0.31616
FBgn0264502	5	0.037536	0.10645	0.994442	1551	3	-0.7127	0.35252	0.50336	0.996647	8062	1	-0.7127
FBgn0266840	4	0.037563	0.092385	0.994442	1552	1	-0.064986	0.13667	0.2517	0.995008	4259	1	-0.064986
FBgn0263869	4	0.037647	0.092544	0.994442	1553	2	-0.24631	0.36638	0.50774	0.996647	8228	2	-0.24631
FBgn0034850	6	0.037654	0.10982	0.994442	1554	2	-0.097571	0.39933	0.56993	0.996647	8616	2	-0.097571
FBgn0024992	1	0.037664	0.037621	0.994442	1555	1	-1.9992	0.96234	0.96265	0.999611	15020	0	-1.9992
FBgn0034105	1	0.037664	0.037621	0.994442	1556	1	-1.9992	0.96234	0.96265	0.999611	15021	0	-1.9992
FBgn0033272	6	0.037691	0.10992	0.994442	1557	4	-0.65615	0.98464	0.98467	0.999611	15388	0	-0.65615
FBgn0052259	6	0.037704	0.10995	0.994442	1558	4	-0.44815	0.67469	0.76491	0.999611	11572	1	-0.44815
FBgn0262143	6	0.037745	0.11007	0.994442	1559	3	0.0054414	0.23434	0.42013	0.996197	6243	3	0.0054414
FBgn0038692	6	0.037745	0.11007	0.994442	1560	2	-0.17444	0.080383	0.20588	0.995008	2974	2	-0.17444
FBgn0263005	6	0.037757	0.1101	0.994442	1561	2	0.22773	0.15836	0.31797	0.995008	4719	3	0.22773
FBgn0038815	5	0.037764	0.10688	0.994442	1562	3	-0.37643	0.41952	0.56643	0.996647	8848	2	-0.37643
FBgn0083961	6	0.03778	0.11016	0.994442	1563	4	-0.41039	0.98313	0.98313	0.999611	15366	0	-0.41039
FBgn0265376	4	0.037794	0.092863	0.994442	1564	1	0.0295	0.14835	0.26472	0.995008	4504	2	0.0295
FBgn0042126	6	0.037839	0.11029	0.994442	1565	4	-0.335	0.96193	0.96199	0.999611	15013	0	-0.335
FBgn0037448	10	0.037846	0.13414	0.994442	1566	5	-0.28918	0.072404	0.21954	0.995008	2730	3	-0.28918
FBgn0026702	6	0.037861	0.11035	0.994442	1567	2	-0.20269	0.98339	0.9834	0.999611	15369	0	-0.20269
FBgn0037131	6	0.03793	0.11051	0.994442	1568	3	-0.072476	0.132	0.2814	0.995008	4147	3	-0.072476
FBgn0026616	6	0.037984	0.11064	0.994442	1569	4	-0.37216	0.99629	0.99628	0.999874	15558	0	-0.37216
FBgn0026207	6	0.037984	0.11064	0.994442	1570	4	-0.4491	0.8465	0.85404	0.999611	13294	1	-0.4491
FBgn0038584	6	0.037991	0.11065	0.994442	1571	4	-0.38346	0.94352	0.94336	0.999611	14718	0	-0.38346
FBgn0036030	6	0.037991	0.11065	0.994442	1572	3	-0.21554	0.52916	0.67334	0.996647	10132	1	-0.21554
FBgn0036593	6	0.03803	0.11076	0.994442	1573	3	-0.16932	0.54898	0.68998	0.996647	10368	2	-0.16932
FBgn0038113	6	0.03803	0.11076	0.994442	1574	2	-0.15477	0.84879	0.8557	0.999611	13331	1	-0.15477
FBgn0037826	6	0.038137	0.111	0.994442	1575	1	0.070448	0.17613	0.34244	0.995008	5083	2	0.070448
FBgn0038135	6	0.038235	0.11121	0.994442	1576	3	-0.20533	0.47215	0.62713	0.996647	9443	2	-0.20533
FBgn0034328	6	0.038275	0.11131	0.994442	1577	2	-0.13225	0.64768	0.75463	0.999611	11373	1	-0.13225
FBgn0265893	4	0.038282	0.093884	0.994442	1578	2	-0.13349	0.82431	0.8238	0.999611	13020	0	-0.13349
FBgn0051436	6	0.038309	0.11138	0.994442	1579	2	-0.14716	0.83066	0.84306	0.999611	13103	1	-0.14716
FBgn0264518	4	0.038353	0.09405	0.994442	1580	2	-0.20266	0.54478	0.60285	0.996647	10320	1	-0.20266
FBgn0265204	4	0.038362	0.09407	0.994442	1581	3	-0.43005	0.41658	0.53527	0.996647	8816	1	-0.43005
FBgn0033400	6	0.038441	0.11169	0.994442	1582	3	-0.22314	0.38857	0.5616	0.996647	8494	1	-0.22314
FBgn0028475	4	0.038506	0.094371	0.994442	1583	3	-0.39764	0.028547	0.073818	0.990489	1310	1	-0.39764
FBgn0035325	1	0.038526	0.038466	0.994442	1584	1	-0.66305	0.96147	0.9618	0.999611	15006	0	-0.66305
FBgn0267336	6	0.038528	0.11189	0.994442	1585	3	-0.28447	0.87205	0.87397	0.999611	13616	1	-0.28447
FBgn0052219	6	0.038528	0.11189	0.994442	1586	4	-0.53098	0.90608	0.90581	0.999611	14132	0	-0.53098
FBgn0085203	6	0.038551	0.11193	0.994442	1587	2	-0.038075	0.032115	0.097222	0.990489	1442	2	-0.038075
FBgn0259708	2	0.038592	0.069708	0.994442	1588	1	-0.62258	0.87978	0.87944	0.999611	13738	0	-0.62258
FBgn0262827	6	0.038604	0.11206	0.994442	1589	2	0.04463	0.27446	0.47212	0.996647	6996	3	0.04463
FBgn0010341	6	0.038676	0.11224	0.994442	1590	4	-0.67887	0.68232	0.76789	0.999611	11637	1	-0.67887
FBgn0028504	6	0.038758	0.11245	0.994442	1591	3	-0.64073	0.929	0.92882	0.999611	14493	0	-0.64073
FBgn0026324	6	0.038758	0.11245	0.994442	1592	2	-0.14636	0.081584	0.20848	0.995008	3010	2	-0.14636
FBgn0021856	6	0.038758	0.11245	0.994442	1593	2	-0.10621	0.13302	0.28284	0.995008	4171	1	-0.10621
FBgn0031250	6	0.038769	0.11248	0.994442	1594	4	-0.28398	0.31046	0.50239	0.996647	7498	2	-0.28398
FBgn0032362	6	0.038817	0.11259	0.994442	1595	4	-0.23919	0.22145	0.4031	0.995008	5997	1	-0.23919
FBgn0014000	6	0.038845	0.11266	0.994442	1596	3	-0.17871	0.95754	0.95752	0.999611	14942	0	-0.17871
FBgn0028670	6	0.038896	0.11279	0.994442	1597	4	-0.74011	0.39432	0.56607	0.996647	8570	2	-0.74011
FBgn0030679	6	0.038965	0.11295	0.994442	1598	2	-0.098419	0.17434	0.34002	0.995008	5040	3	-0.098419
FBgn0263653	4	0.03898	0.095363	0.994442	1599	3	-0.69481	0.94032	0.94004	0.999611	14663	0	-0.69481
FBgn0036317	4	0.03898	0.095363	0.994442	1600	3	-1.0038	0.67998	0.69219	0.996647	11620	1	-1.0038
FBgn0003206	6	0.038984	0.113	0.994442	1601	4	-0.7613	0.068184	0.17971	0.995008	2625	1	-0.7613
FBgn0034356	6	0.039034	0.11311	0.994442	1602	2	-0.30011	0.37421	0.55055	0.996647	8314	2	-0.30011
FBgn0022160	8	0.03906	0.12627	0.994442	1603	4	-0.4631	0.39404	0.61167	0.996647	8566	2	-0.4631
FBgn0263082	4	0.039064	0.095538	0.994442	1604	1	0.19158	0.17429	0.29391	0.995008	5039	2	0.19158
FBgn0037324	6	0.039172	0.11341	0.994442	1605	2	0.13369	0.066435	0.17583	0.995008	2561	2	0.13369
FBgn0267817	4	0.039238	0.095879	0.994442	1606	2	-0.2502	0.65795	0.67595	0.996647	11457	1	-0.2502
FBgn0010265	6	0.039335	0.11381	0.994442	1607	4	-0.51766	0.86471	0.86799	0.999611	13528	1	-0.51766
FBgn0052413	6	0.039369	0.11389	0.994442	1608	3	-0.67305	0.93918	0.93909	0.999611	14646	0	-0.67305
FBgn0034915	6	0.039379	0.11391	0.994442	1609	2	0.0035799	0.3789	0.55414	0.996647	8365	1	0.0035799
FBgn0034858	4	0.039433	0.096268	0.994442	1610	1	-0.027116	0.71647	0.72125	0.996911	11924	1	-0.027116
FBgn0004649	6	0.039448	0.11409	0.994442	1611	3	-0.29852	0.31466	0.50545	0.996647	7564	2	-0.29852
FBgn0030864	2	0.039512	0.071314	0.994442	1612	1	-0.72105	0.58938	0.58911	0.996647	10879	0	-0.72105
FBgn0034135	6	0.039526	0.11426	0.994442	1613	3	-0.44997	0.30125	0.49553	0.996647	7368	1	-0.44997
FBgn0034837	6	0.039526	0.11426	0.994442	1614	2	-0.053225	0.40221	0.57219	0.996647	8650	2	-0.053225
FBgn0037147	6	0.039552	0.11433	0.994442	1615	2	-0.50886	0.57573	0.71248	0.996911	10703	1	-0.50886
FBgn0264914	1	0.039602	0.039528	0.994442	1616	1	-0.70582	0.9604	0.96071	0.999611	14988	0	-0.70582
FBgn0030018	6	0.039602	0.11444	0.994442	1617	3	-0.331	0.87324	0.87496	0.999611	13631	1	-0.331
FBgn0030927	6	0.039636	0.11452	0.994442	1618	4	-0.70158	0.98698	0.98702	0.999763	15426	0	-0.70158
FBgn0010423	6	0.039636	0.11453	0.994442	1619	2	0.23518	0.22752	0.41111	0.995721	6110	3	0.23518
FBgn0085491	6	0.039636	0.11453	0.994442	1620	3	-0.35001	0.81883	0.83527	0.999611	12947	1	-0.35001
FBgn0266756	14	0.039653	0.15576	0.994442	1621	4	0.12596	0.18425	0.4474	0.996647	5235	5	0.12596
FBgn0027603	6	0.039758	0.1148	0.994442	1622	3	-0.70388	0.92727	0.92707	0.999611	14461	0	-0.70388
FBgn0000615	6	0.039825	0.11496	0.994442	1623	3	-0.24978	0.91127	0.91098	0.999611	14203	0	-0.24978
FBgn0053640	6	0.039904	0.11514	0.994442	1624	2	-0.030148	0.011532	0.043965	0.98853	636	2	-0.030148
FBgn0032476	6	0.039931	0.11519	0.994442	1625	4	-0.53311	0.72715	0.78663	0.999611	12004	1	-0.53311
FBgn0262028	4	0.03994	0.097343	0.994442	1626	1	0.048695	0.78812	0.78758	0.999611	12614	0	0.048695
FBgn0263998	6	0.039961	0.11526	0.994442	1627	4	-0.27562	0.078525	0.20192	0.995008	2927	2	-0.27562
FBgn0265587	4	0.040009	0.097495	0.994442	1628	2	-0.0098423	0.64916	0.66973	0.996647	11392	1	-0.0098423
FBgn0051475	6	0.040069	0.11551	0.994442	1629	2	0.17098	0.26748	0.46311	0.996647	6865	2	0.17098
FBgn0010052	6	0.040125	0.11563	0.994442	1630	3	-1.1961	0.95269	0.95263	0.999611	14864	0	-1.1961
FBgn0034715	6	0.040125	0.11563	0.994442	1631	3	-0.51363	0.42504	0.58993	0.996647	8901	2	-0.51363
FBgn0031844	6	0.040125	0.11563	0.994442	1632	3	-0.15998	0.11089	0.25133	0.995008	3687	3	-0.15998
FBgn0029827	6	0.040134	0.11564	0.994442	1633	4	-0.58025	0.010465	0.040192	0.98853	580	2	-0.58025
FBgn0037822	4	0.040228	0.097964	0.994442	1634	3	-1.0987	0.17594	0.29575	0.995008	5078	1	-1.0987
FBgn0261112	4	0.040228	0.097964	0.994442	1635	3	-1.0656	0.93698	0.93671	0.999611	14617	0	-1.0656
FBgn0032223	6	0.040275	0.11598	0.994442	1636	2	0.25507	0.28526	0.48382	0.996647	7158	2	0.25507
FBgn0032072	6	0.040315	0.11608	0.994442	1637	4	-0.39666	0.80788	0.82853	0.999611	12828	1	-0.39666
FBgn0032549	6	0.040315	0.11608	0.994442	1638	4	-0.35431	0.95903	0.95903	0.999611	14970	0	-0.35431
FBgn0259226	6	0.040344	0.11614	0.994442	1639	3	-0.31479	0.33506	0.52079	0.996647	7834	2	-0.31479
FBgn0030039	6	0.04037	0.11619	0.994442	1640	3	-0.30328	0.59094	0.72553	0.996911	10902	1	-0.30328
FBgn0044048	6	0.040384	0.11622	0.994442	1641	4	-0.25754	0.54856	0.68962	0.996647	10362	1	-0.25754
FBgn0001083	8	0.040391	0.12968	0.994442	1642	2	-0.058477	0.30327	0.52453	0.996647	7398	2	-0.058477
FBgn0035512	5	0.040392	0.11176	0.994442	1643	2	-0.11001	0.23488	0.39489	0.995008	6256	2	-0.11001
FBgn0259745	8	0.040393	0.12969	0.994442	1644	4	-0.36027	0.37857	0.59688	0.996647	8361	2	-0.36027
FBgn0052296	6	0.040397	0.11625	0.994442	1645	4	-0.204	0.93994	0.93985	0.999611	14659	0	-0.204
FBgn0043530	4	0.040401	0.098315	0.994442	1646	2	-0.42201	0.72049	0.72464	0.996911	11957	1	-0.42201
FBgn0051852	6	0.040481	0.11645	0.994442	1647	2	0.15063	0.053069	0.14598	0.995008	2143	3	0.15063
FBgn0084001	6	0.040481	0.11645	0.994442	1648	3	-0.33222	0.061237	0.16437	0.995008	2408	2	-0.33222
FBgn0027074	6	0.040481	0.11645	0.994442	1649	3	-0.40241	0.81357	0.832	0.999611	12880	1	-0.40241
FBgn0031324	6	0.040481	0.11645	0.994442	1650	3	-0.20822	0.79467	0.82072	0.999611	12671	1	-0.20822
FBgn0260003	14	0.040564	0.1582	0.994442	1651	2	0.082093	0.17036	0.42606	0.996647	4952	6	0.082093
FBgn0051080	6	0.040584	0.11669	0.994442	1652	4	-0.3997	0.55551	0.6954	0.996647	10459	1	-0.3997
FBgn0003124	6	0.040594	0.11672	0.994442	1653	4	-0.59835	0.99866	0.99861	0.999874	15601	0	-0.59835
FBgn0010194	6	0.040594	0.11672	0.994442	1654	3	-0.32717	0.55904	0.69832	0.996647	10503	2	-0.32717
FBgn0023517	4	0.040654	0.098823	0.994442	1655	2	-0.41118	0.4801	0.56733	0.996647	9534	1	-0.41118
FBgn0035915	6	0.040796	0.1172	0.994442	1656	4	-0.38101	0.70387	0.77656	0.999611	11819	1	-0.38101
FBgn0039965	6	0.040861	0.11738	0.994442	1657	2	-0.1416	0.37193	0.54875	0.996647	8288	2	-0.1416
FBgn0036979	6	0.040862	0.11738	0.994442	1658	4	-0.49192	0.99101	0.99101	0.999763	15490	0	-0.49192
FBgn0083946	6	0.04096	0.11761	0.994442	1659	3	-0.23142	0.38915	0.56205	0.996647	8503	2	-0.23142
FBgn0004507	6	0.041033	0.11779	0.994442	1660	2	-0.51671	0.12341	0.26929	0.995008	3953	2	-0.51671
FBgn0003016	6	0.041038	0.1178	0.994442	1661	2	0.066008	0.46573	0.62206	0.996647	9372	2	0.066008
FBgn0039522	6	0.041038	0.1178	0.994442	1662	2	-0.17753	0.94555	0.94539	0.999611	14754	0	-0.17753
FBgn0030829	6	0.041044	0.11782	0.994442	1663	4	-0.36636	0.3526	0.53407	0.996647	8064	1	-0.36636
FBgn0042711	6	0.041044	0.11782	0.994442	1664	4	-0.43389	0.99146	0.99147	0.999874	15495	0	-0.43389
FBgn0034127	6	0.041044	0.11782	0.994442	1665	4	-0.48505	0.43851	0.6006	0.996647	9048	2	-0.48505
FBgn0026181	4	0.041115	0.099783	0.994442	1666	1	0.028019	0.10509	0.21613	0.995008	3573	2	0.028019
FBgn0038158	6	0.041171	0.11813	0.994442	1667	2	0.25417	0.074251	0.19278	0.995008	2786	4	0.25417
FBgn0264842	4	0.04119	0.09994	0.994442	1668	3	-0.5141	0.038487	0.094715	0.990489	1662	1	-0.5141
FBgn0039338	8	0.041346	0.13221	0.994442	1669	3	0.15327	0.00062595	0.0036859	0.980433	42	3	0.15327
FBgn0036537	6	0.041377	0.11862	0.994442	1670	1	0.29518	0.023377	0.075828	0.990489	1102	4	0.29518
FBgn0259961	6	0.041401	0.11868	0.994442	1671	4	-0.68341	0.4276	0.59198	0.996647	8931	1	-0.68341
FBgn0027560	6	0.041446	0.11878	0.994442	1672	3	-0.33719	0.15712	0.31624	0.995008	4695	2	-0.33719
FBgn0034481	6	0.041501	0.11891	0.994442	1673	4	-0.30427	0.95626	0.95621	0.999611	14918	0	-0.30427
FBgn0039254	4	0.04153	0.10063	0.994442	1674	3	-0.75243	0.99067	0.99071	0.999763	15473	0	-0.75243
FBgn0267078	4	0.041576	0.10073	0.994442	1675	1	0.30882	0.06237	0.14287	0.995008	2437	2	0.30882
FBgn0031183	6	0.041584	0.11912	0.994442	1676	2	0.065523	0.57603	0.71275	0.996911	10705	2	0.065523
FBgn0051391	5	0.04163	0.11407	0.994442	1677	1	0.37386	0.030487	0.091131	0.990489	1389	4	0.37386
FBgn0035663	5	0.041652	0.11411	0.994442	1678	2	0.025555	0.046359	0.12462	0.995008	1903	2	0.025555
FBgn0010383	6	0.041806	0.11963	0.994442	1679	3	-0.3823	0.52234	0.66766	0.996647	10040	1	-0.3823
FBgn0030103	6	0.041843	0.11972	0.994442	1680	4	-0.60618	0.49586	0.64621	0.996647	9724	1	-0.60618
FBgn0085447	14	0.041844	0.16164	0.994442	1681	4	0.015079	0.25814	0.5527	0.996647	6693	5	0.015079
FBgn0037533	2	0.041873	0.075362	0.994442	1682	2	-0.43803	0.95813	0.95805	0.999611	14955	0	-0.43803
FBgn0267232	2	0.041873	0.075362	0.994442	1683	2	-1.3917	0.95813	0.95805	0.999611	14956	0	-1.3917
FBgn0024365	6	0.041997	0.12008	0.994442	1684	3	-0.14809	0.03862	0.11267	0.995008	1667	2	-0.14809
FBgn0024285	6	0.042035	0.12017	0.994442	1685	4	-0.70103	0.86617	0.86919	0.999611	13549	1	-0.70103
FBgn0262813	6	0.042035	0.12017	0.994442	1686	4	-0.31497	0.33053	0.51742	0.996647	7778	2	-0.31497
FBgn0037110	6	0.042035	0.12017	0.994442	1687	4	-0.51925	0.25059	0.44144	0.996647	6550	1	-0.51925
FBgn0051788	6	0.042035	0.12017	0.994442	1688	4	-0.34133	0.91198	0.91168	0.999611	14220	0	-0.34133
FBgn0052772	6	0.042066	0.12024	0.994442	1689	1	-0.23092	0.55382	0.69398	0.996647	10439	1	-0.23092
FBgn0261833	4	0.042169	0.10192	0.994442	1690	3	-0.41097	0.40592	0.53017	0.996647	8703	1	-0.41097
FBgn0010412	4	0.042358	0.10232	0.994442	1691	1	-0.33736	0.22217	0.34751	0.995008	6013	2	-0.33736
FBgn0034093	6	0.042384	0.12096	0.994442	1692	4	-0.40212	0.39046	0.5631	0.996647	8518	2	-0.40212
FBgn0005658	6	0.042394	0.12098	0.994442	1693	4	-0.32778	0.89552	0.89532	0.999611	13970	0	-0.32778
FBgn0038499	6	0.042524	0.12129	0.994442	1694	4	-0.34355	0.42438	0.5894	0.996647	8886	2	-0.34355
FBgn0259795	6	0.042547	0.12134	0.994442	1695	1	0.33136	0.062625	0.16746	0.995008	2446	4	0.33136
FBgn0002413	6	0.042581	0.12141	0.994442	1696	4	-0.39324	0.94843	0.94828	0.999611	14793	0	-0.39324
FBgn0032132	6	0.042616	0.12149	0.994442	1697	2	-0.12444	0.31239	0.50385	0.996647	7525	2	-0.12444
FBgn0267925	4	0.042647	0.10293	0.994442	1698	2	-0.35162	0.95525	0.95501	0.999611	14903	0	-0.35162
FBgn0266421	6	0.042676	0.12165	0.994442	1699	4	-0.96424	0.95302	0.95294	0.999611	14868	0	-0.96424
FBgn0040355	6	0.042676	0.12165	0.994442	1700	4	-0.43607	0.99856	0.99851	0.999874	15595	0	-0.43607
FBgn0053483	6	0.042688	0.12167	0.994442	1701	3	-0.38518	0.62262	0.74576	0.999611	11193	1	-0.38518
FBgn0032914	6	0.042688	0.12167	0.994442	1702	3	-0.17014	0.31095	0.50273	0.996647	7508	2	-0.17014
FBgn0030082	4	0.04269	0.10302	0.994442	1703	3	-0.30325	0.81673	0.81622	0.999611	12914	0	-0.30325
FBgn0031021	4	0.042756	0.10316	0.994442	1704	3	-0.45382	0.81177	0.81129	0.999611	12864	0	-0.45382
FBgn0032094	6	0.042913	0.12223	0.994442	1705	2	0.33947	0.056482	0.15367	0.995008	2249	4	0.33947
FBgn0034700	6	0.04296	0.12233	0.994442	1706	3	-0.37018	0.85839	0.86292	0.999611	13446	1	-0.37018
FBgn0053494	5	0.042979	0.11659	0.994442	1707	1	0.2151	0.58792	0.68031	0.996647	10856	1	0.2151
FBgn0015582	6	0.043028	0.1225	0.994442	1708	3	-0.24051	0.7523	0.79847	0.999611	12259	1	-0.24051
FBgn0085412	6	0.043117	0.12271	0.994442	1709	4	-0.36762	0.9008	0.9006	0.999611	14043	0	-0.36762
FBgn0053795	6	0.043117	0.12271	0.994442	1710	3	-0.37641	0.28461	0.48337	0.996647	7149	1	-0.37641
FBgn0040007	6	0.043117	0.12271	0.994442	1711	2	-0.085723	0.64069	0.75217	0.999611	11319	1	-0.085723
FBgn0039778	6	0.043132	0.12275	0.994442	1712	1	0.37668	0.023596	0.076351	0.990489	1114	4	0.37668
FBgn0085256	6	0.043132	0.12275	0.994442	1713	1	0.35838	0.0040172	0.01697	0.980433	242	4	0.35838
FBgn0052152	6	0.043136	0.12276	0.994442	1714	3	-0.34736	0.1698	0.33366	0.995008	4944	1	-0.34736
FBgn0004053	6	0.043235	0.12299	0.994442	1715	2	-0.39235	0.59559	0.72955	0.998569	10956	1	-0.39235
FBgn0030455	4	0.043237	0.10416	0.994442	1716	2	-0.38824	0.75632	0.75659	0.999611	12303	1	-0.38824
FBgn0051481	6	0.043271	0.12308	0.994442	1717	3	-0.066048	0.35563	0.53633	0.996647	8107	1	-0.066048
FBgn0010549	3	0.043287	0.09395	0.994442	1718	2	-1.2701	0.92903	0.92921	0.999611	14495	0	-1.2701
FBgn0003882	6	0.043303	0.12316	0.994442	1719	1	0.12352	0.19952	0.37408	0.995008	5563	2	0.12352
FBgn0027951	6	0.043361	0.12329	0.994442	1720	3	-0.38452	0.85332	0.85902	0.999611	13383	1	-0.38452
FBgn0036128	6	0.043361	0.12329	0.994442	1721	2	-0.075953	0.66097	0.75962	0.999611	11484	1	-0.075953
FBgn0011603	6	0.043372	0.12332	0.994442	1722	4	-0.61518	0.00064163	0.0034071	0.980433	45	1	-0.61518
FBgn0034769	4	0.043492	0.10472	0.994442	1723	3	-0.5029	0.94692	0.94672	0.999611	14775	0	-0.5029
FBgn0014849	4	0.043492	0.10472	0.994442	1724	3	-0.78991	0.24095	0.36835	0.995008	6369	1	-0.78991
FBgn0034248	6	0.043647	0.12396	0.994442	1725	4	-0.30687	0.033572	0.1007	0.994224	1491	2	-0.30687
FBgn0039481	6	0.043652	0.12397	0.994442	1726	3	-0.37061	0.41609	0.58286	0.996647	8815	2	-0.37061
FBgn0000256	12	0.043671	0.16118	0.994442	1727	6	-0.28765	0.052004	0.18397	0.995008	2097	5	-0.28765
FBgn0267776	4	0.043738	0.10519	0.994442	1728	2	-0.10881	0.75387	0.75435	0.999611	12281	1	-0.10881
FBgn0027844	6	0.043755	0.12421	0.994442	1729	3	-0.028076	0.01475	0.053963	0.990489	780	3	-0.028076
FBgn0032074	6	0.043759	0.12421	0.994442	1730	4	-0.35411	0.56245	0.70119	0.99676	10542	1	-0.35411
FBgn0024179	5	0.04379	0.11806	0.994442	1731	3	-0.24103	0.92484	0.92511	0.999611	14416	0	-0.24103
FBgn0053796	5	0.043829	0.11811	0.994442	1732	3	-0.41602	0.9041	0.90437	0.999611	14098	0	-0.41602
FBgn0030506	4	0.043831	0.1054	0.994442	1733	3	-1.1059	0.11483	0.22712	0.995008	3769	1	-1.1059
FBgn0261841	2	0.043871	0.078805	0.994442	1734	2	-0.40404	0.95613	0.95605	0.999611	14915	0	-0.40404
FBgn0024995	6	0.043887	0.12453	0.994442	1735	1	0.17914	0.081673	0.20867	0.995008	3013	4	0.17914
FBgn0039008	6	0.043887	0.12453	0.994442	1736	3	-0.69209	0.90442	0.90414	0.999611	14105	0	-0.69209
FBgn0039251	6	0.043894	0.12455	0.994442	1737	4	-0.43223	0.86064	0.86468	0.999611	13469	1	-0.43223
FBgn0026432	6	0.043958	0.12471	0.994442	1738	2	0.12744	0.5459	0.6874	0.996647	10334	1	0.12744
FBgn0037994	4	0.044021	0.10576	0.994442	1739	3	-0.48758	0.95992	0.95971	0.999611	14980	0	-0.48758
FBgn0266649	4	0.044101	0.10592	0.994442	1740	3	-0.39076	0.81458	0.81408	0.999611	12895	0	-0.39076
FBgn0015574	6	0.044162	0.12519	0.994442	1741	2	-0.049153	0.20746	0.38466	0.995008	5726	2	-0.049153
FBgn0027552	6	0.044188	0.12524	0.994442	1742	3	-0.26962	0.62964	0.74824	0.999611	11245	1	-0.26962
FBgn0034139	6	0.044188	0.12524	0.994442	1743	2	0.33214	0.050361	0.13982	0.995008	2040	4	0.33214
FBgn0030683	5	0.044212	0.11881	0.994442	1744	3	-0.40058	0.222	0.38293	0.995008	6009	1	-0.40058
FBgn0265948	4	0.044244	0.10621	0.994442	1745	2	-0.14139	0.16314	0.28143	0.995008	4826	2	-0.14139
FBgn0264380	4	0.044248	0.10622	0.994442	1746	3	-0.75959	0.90997	0.90967	0.999611	14182	0	-0.75959
FBgn0033727	6	0.0443	0.1255	0.994442	1747	2	0.048545	0.17352	0.33884	0.995008	5022	3	0.048545
FBgn0030186	6	0.044319	0.12554	0.994442	1748	4	-0.48156	0.95521	0.95516	0.999611	14899	0	-0.48156
FBgn0037014	6	0.044403	0.12572	0.994442	1749	2	-0.10752	0.82454	0.83898	0.999611	13022	1	-0.10752
FBgn0265926	4	0.044427	0.10656	0.994442	1750	2	-0.19757	0.80256	0.80203	0.999611	12754	0	-0.19757
FBgn0266391	4	0.044427	0.10656	0.994442	1751	3	-0.52273	0.75387	0.75435	0.999611	12283	1	-0.52273
FBgn0040729	6	0.044432	0.12579	0.994442	1752	3	-0.54541	0.27497	0.47281	0.996647	7006	3	-0.54541
FBgn0261529	6	0.044432	0.12579	0.994442	1753	3	-0.39226	0.9605	0.96054	0.999611	14991	0	-0.39226
FBgn0033460	6	0.044432	0.12579	0.994442	1754	3	-0.47233	0.27218	0.4692	0.996647	6954	2	-0.47233
FBgn0027080	4	0.044482	0.10667	0.994442	1755	3	-0.68945	0.49867	0.57714	0.996647	9765	1	-0.68945
FBgn0037408	6	0.044493	0.12593	0.994442	1756	3	-0.27674	0.52584	0.67056	0.996647	10095	1	-0.27674
FBgn0045482	6	0.044493	0.12593	0.994442	1757	2	-0.22119	0.25523	0.4474	0.996647	6634	1	-0.22119
FBgn0261363	2	0.044508	0.079923	0.994442	1758	2	-0.51603	0.95549	0.95539	0.999611	14909	0	-0.51603
FBgn0031547	6	0.044574	0.12612	0.994442	1759	1	0.060536	0.722	0.78435	0.999611	11967	1	0.060536
FBgn0027095	6	0.044574	0.12612	0.994442	1760	2	-0.18551	0.98252	0.98253	0.999611	15351	0	-0.18551
FBgn0264979	6	0.044584	0.12615	0.994442	1761	3	-0.29442	0.67692	0.76577	0.999611	11590	1	-0.29442
FBgn0265877	4	0.044612	0.10694	0.994442	1762	3	-0.59438	0.84934	0.84882	0.999611	13336	0	-0.59438
FBgn0260940	6	0.044677	0.12638	0.994442	1763	4	-0.57423	0.87491	0.87641	0.999611	13652	1	-0.57423
FBgn0039444	5	0.044686	0.11967	0.994442	1764	3	-0.38413	0.81925	0.82165	0.999611	12953	1	-0.38413
FBgn0032974	6	0.044749	0.12654	0.994442	1765	2	-0.16856	0.9149	0.91456	0.999611	14255	0	-0.16856
FBgn0037716	6	0.044814	0.1267	0.994442	1766	1	0.3997	0.037795	0.11076	0.995008	1639	4	0.3997
FBgn0259098	6	0.044814	0.1267	0.994442	1767	3	-0.25481	0.89302	0.89288	0.999611	13928	1	-0.25481
FBgn0031988	6	0.044835	0.12675	0.994442	1768	4	-0.38118	0.80537	0.82702	0.999611	12791	1	-0.38118
FBgn0004049	5	0.044894	0.12005	0.994442	1769	3	-0.55868	0.8902	0.89051	0.999611	13880	0	-0.55868
FBgn0031098	6	0.045018	0.12715	0.994442	1770	4	-0.2979	0.99019	0.99022	0.999763	15464	0	-0.2979
FBgn0038697	6	0.045018	0.12715	0.994442	1771	4	-0.39245	0.99106	0.99106	0.999763	15491	0	-0.39245
FBgn0032600	6	0.045055	0.12725	0.994442	1772	1	0.24149	0.1807	0.34864	0.995008	5166	3	0.24149
FBgn0034978	6	0.045055	0.12725	0.994442	1773	3	-0.2498	0.32969	0.51679	0.996647	7771	1	-0.2498
FBgn0003719	6	0.045096	0.12734	0.994442	1774	4	-0.34991	0.87789	0.87894	0.999611	13705	1	-0.34991
FBgn0002924	4	0.045209	0.10816	0.994442	1775	2	-0.35028	0.80813	0.80761	0.999611	12830	0	-0.35028
FBgn0023489	6	0.045229	0.12765	0.994442	1776	2	0.074239	0.15057	0.30715	0.995008	4557	3	0.074239
FBgn0033440	6	0.045287	0.12779	0.994442	1777	4	-0.76315	0.54257	0.68455	0.996647	10299	2	-0.76315
FBgn0010051	6	0.045287	0.12779	0.994442	1778	4	-0.34771	0.11308	0.25455	0.995008	3722	2	-0.34771
FBgn0038009	6	0.045287	0.12779	0.994442	1779	4	-0.36811	0.58607	0.72131	0.996911	10835	1	-0.36811
FBgn0010014	6	0.045287	0.12779	0.994442	1780	4	-0.51846	0.04351	0.12412	0.995008	1823	2	-0.51846
FBgn0010453	6	0.045287	0.12779	0.994442	1781	4	-0.41581	0.9392	0.93911	0.999611	14648	0	-0.41581
FBgn0265956	4	0.045289	0.10831	0.994442	1782	3	-0.47924	0.93376	0.93346	0.999611	14563	0	-0.47924
FBgn0039929	4	0.045346	0.10843	0.994442	1783	2	-0.54488	0.58363	0.6262	0.996647	10802	1	-0.54488
FBgn0053926	6	0.045362	0.12796	0.994442	1784	3	-0.44159	0.44738	0.60747	0.996647	9164	1	-0.44159
FBgn0052544	6	0.045404	0.12804	0.994442	1785	2	-0.12474	0.8799	0.88069	0.999611	13741	1	-0.12474
FBgn0015230	5	0.045417	0.12103	0.994442	1786	3	-0.68012	0.040136	0.11328	0.995008	1725	1	-0.68012
FBgn0032085	6	0.045456	0.12817	0.994442	1787	3	-1.3385	0.99131	0.99131	0.999824	15494	0	-1.3385
FBgn0037592	6	0.045456	0.12817	0.994442	1788	3	-0.68074	0.11386	0.25572	0.995008	3743	2	-0.68074
FBgn0054040	6	0.045456	0.12817	0.994442	1789	3	-0.18599	0.048757	0.13619	0.995008	1984	3	-0.18599
FBgn0039078	6	0.045456	0.12817	0.994442	1790	3	-0.17844	0.083472	0.2114	0.995008	3053	2	-0.17844
FBgn0025676	6	0.045456	0.12817	0.994442	1791	3	-0.48041	0.95223	0.95214	0.999611	14854	0	-0.48041
FBgn0033887	6	0.045456	0.12817	0.994442	1792	3	-0.39823	0.74653	0.79563	0.999611	12197	1	-0.39823
FBgn0266801	6	0.045456	0.12817	0.994442	1793	4	-0.40906	0.78539	0.81552	0.999611	12577	1	-0.40906
FBgn0261015	6	0.045456	0.12817	0.994442	1794	3	-0.18211	0.35563	0.53633	0.996647	8110	2	-0.18211
FBgn0263622	4	0.045486	0.10873	0.994442	1795	3	-0.36066	0.011809	0.037047	0.980433	653	1	-0.36066
FBgn0039109	6	0.045512	0.1283	0.994442	1796	3	-0.59027	0.9243	0.92409	0.999611	14406	0	-0.59027
FBgn0032843	6	0.045568	0.12844	0.994442	1797	4	-0.3923	0.72481	0.78561	0.999611	11988	1	-0.3923
FBgn0034497	7	0.045573	0.13627	0.994442	1798	3	-0.19198	0.29925	0.50485	0.996647	7343	2	-0.19198
FBgn0265961	4	0.045622	0.10898	0.994442	1799	2	-0.56572	0.9466	0.9464	0.999611	14767	0	-0.56572
FBgn0032900	6	0.045741	0.12884	0.994442	1800	2	-0.15652	0.2898	0.48719	0.996647	7221	1	-0.15652
FBgn0040801	6	0.045757	0.12888	0.994442	1801	4	-0.3824	0.86239	0.8661	0.999611	13501	1	-0.3824
FBgn0265312	4	0.045758	0.10927	0.994442	1802	3	-0.32231	0.96883	0.96861	0.999611	15130	0	-0.32231
FBgn0267455	4	0.045837	0.10945	0.994442	1803	3	-0.41369	0.38104	0.51847	0.996647	8402	1	-0.41369
FBgn0262858	6	0.045867	0.12914	0.994442	1804	4	-0.30198	0.98715	0.98719	0.999763	15428	0	-0.30198
FBgn0039042	6	0.045867	0.12914	0.994442	1805	4	-0.33289	0.11749	0.26098	0.995008	3825	2	-0.33289
FBgn0031523	6	0.045878	0.12917	0.994442	1806	3	-0.65806	0.97171	0.97184	0.999611	15179	0	-0.65806
FBgn0039536	6	0.045878	0.12917	0.994442	1807	1	0.16082	0.13781	0.28954	0.995008	4282	3	0.16082
FBgn0015075	4	0.045915	0.1096	0.994442	1808	3	-0.39899	0.55816	0.61072	0.996647	10493	1	-0.39899
FBgn0051368	6	0.045917	0.12929	0.994442	1809	4	-0.27921	0.89883	0.89862	0.999611	14018	0	-0.27921
FBgn0051202	6	0.045981	0.12943	0.994442	1810	1	-0.087435	0.27209	0.46907	0.996647	6951	1	-0.087435
FBgn0033059	2	0.045997	0.082398	0.994442	1811	2	-1.0469	0.954	0.95387	0.999611	14886	0	-1.0469
FBgn0034942	4	0.046081	0.10995	0.994442	1812	1	-0.019472	0.11343	0.22555	0.995008	3729	2	-0.019472
FBgn0034196	6	0.046087	0.12965	0.994442	1813	3	-0.80018	0.83838	0.84842	0.999611	13204	1	-0.80018
FBgn0040965	4	0.04626	0.11028	0.994442	1814	2	-0.31122	0.63784	0.66173	0.996647	11303	1	-0.31122
FBgn0035830	4	0.04626	0.11028	0.994442	1815	2	-0.36128	0.55955	0.61151	0.996647	10510	1	-0.36128
FBgn0011746	7	0.046284	0.13775	0.994442	1816	3	0.078715	0.67353	0.7944	0.999611	11564	2	0.078715
FBgn0036195	6	0.046324	0.13019	0.994442	1817	2	0.42303	0.0097737	0.037754	0.980433	552	4	0.42303
FBgn0029521	6	0.046333	0.13021	0.994442	1818	3	-0.30886	0.18912	0.36004	0.995008	5336	2	-0.30886
FBgn0050410	6	0.046333	0.13021	0.994442	1819	3	-0.19098	0.4999	0.64942	0.996647	9779	2	-0.19098
FBgn0036677	6	0.046333	0.13021	0.994442	1820	3	-0.68177	0.78205	0.81374	0.999611	12543	1	-0.68177
FBgn0267217	4	0.046356	0.11048	0.994442	1821	1	0.27617	0.037748	0.093148	0.990489	1635	2	0.27617
FBgn0052694	6	0.046395	0.13037	0.994442	1822	4	-0.18913	0.7301	0.78797	0.999611	12031	1	-0.18913
FBgn0030669	6	0.046431	0.13044	0.994442	1823	2	-0.22944	0.052504	0.14467	0.995008	2120	2	-0.22944
FBgn0005561	7	0.046433	0.13806	0.994442	1824	4	-0.46251	0.76238	0.83455	0.999611	12361	1	-0.46251
FBgn0051126	5	0.046446	0.12289	0.994442	1825	2	-0.16879	0.77447	0.78589	0.999611	12465	1	-0.16879
FBgn0034023	6	0.046461	0.13051	0.994442	1826	1	0.24541	0.13518	0.28591	0.995008	4228	3	0.24541
FBgn0035720	4	0.046509	0.11076	0.994442	1827	3	-0.99876	0.977	0.97693	0.999611	15250	0	-0.99876
FBgn0032705	6	0.046523	0.13066	0.994442	1828	3	-0.19758	0.60149	0.7348	0.999611	11017	2	-0.19758
FBgn0083984	6	0.046532	0.13068	0.994442	1829	4	-0.34273	0.98995	0.98997	0.999763	15462	0	-0.34273
FBgn0026598	4	0.046585	0.11093	0.994442	1830	2	-0.139	0.55661	0.60979	0.996647	10477	1	-0.139
FBgn0021995	8	0.046597	0.14595	0.994442	1831	3	0.050473	0.25331	0.47627	0.996647	6605	3	0.050473
FBgn0000360	6	0.046615	0.13087	0.994442	1832	2	-0.052304	0.19682	0.37041	0.995008	5490	2	-0.052304
FBgn0034052	6	0.046657	0.13097	0.994442	1833	4	-0.41731	0.94252	0.94244	0.999611	14697	0	-0.41731
FBgn0035538	6	0.046666	0.13099	0.994442	1834	2	0.23734	0.010104	0.038907	0.98847	570	3	0.23734
FBgn0264346	4	0.046666	0.11109	0.994442	1835	2	-0.45457	0.84846	0.84797	0.999611	13326	0	-0.45457
FBgn0262008	6	0.046713	0.13108	0.994442	1836	3	-0.69561	0.49235	0.64336	0.996647	9684	2	-0.69561
FBgn0031700	6	0.046713	0.13108	0.994442	1837	4	-0.60096	0.67851	0.76638	0.999611	11605	1	-0.60096
FBgn0015570	6	0.046713	0.13108	0.994442	1838	3	-0.2886	0.14307	0.29673	0.995008	4396	1	-0.2886
FBgn0001235	6	0.046758	0.13119	0.994442	1839	3	-0.23826	0.28267	0.48196	0.996647	7125	1	-0.23826
FBgn0029606	6	0.046803	0.13127	0.994442	1840	3	0.068955	0.36909	0.54655	0.996647	8257	2	0.068955
FBgn0032053	6	0.046835	0.13136	0.994442	1841	4	-0.3937	0.49644	0.6467	0.996647	9733	2	-0.3937
FBgn0034733	6	0.046835	0.13136	0.994442	1842	4	-0.38344	0.97082	0.97095	0.999611	15167	0	-0.38344
FBgn0259227	5	0.046846	0.12359	0.994442	1843	3	-0.2962	0.11412	0.2399	0.995008	3750	1	-0.2962
FBgn0266790	4	0.046849	0.11149	0.994442	1844	3	-0.32029	0.36675	0.50815	0.996647	8231	1	-0.32029
FBgn0031554	6	0.046872	0.13144	0.994442	1845	2	-0.9996	0.74082	0.79299	0.999611	12133	1	-0.9996
FBgn0036019	6	0.04694	0.13159	0.994442	1846	3	-0.1131	0.37936	0.55448	0.996647	8373	2	-0.1131
FBgn0267679	4	0.046942	0.11167	0.994442	1847	2	-0.37764	0.92265	0.92234	0.999611	14378	0	-0.37764
FBgn0051016	6	0.047009	0.13174	0.994442	1848	2	0.034502	0.81121	0.83061	0.999611	12861	1	0.034502
FBgn0266324	2	0.04702	0.0841	0.994442	1849	2	-1.2643	0.95298	0.95282	0.999611	14867	0	-1.2643
FBgn0033979	6	0.047202	0.13218	0.994442	1850	4	-0.38622	0.55641	0.69618	0.996647	10473	2	-0.38622
FBgn0052199	6	0.047202	0.13218	0.994442	1851	4	-0.67519	0.82754	0.84093	0.999611	13062	1	-0.67519
FBgn0031602	6	0.047202	0.13218	0.994442	1852	4	-0.63138	0.92154	0.92128	0.999611	14355	0	-0.63138
FBgn0000463	6	0.047202	0.13218	0.994442	1853	4	-0.26603	0.60794	0.74034	0.999611	11085	2	-0.26603
FBgn0040371	6	0.047213	0.13221	0.994442	1854	3	-0.2235	0.88999	0.88996	0.999611	13877	1	-0.2235
FBgn0265161	4	0.047222	0.1122	0.994442	1855	3	-0.39251	0.98057	0.98054	0.999611	15313	0	-0.39251
FBgn0035601	4	0.047273	0.11229	0.994442	1856	1	0.06251	0.11407	0.22629	0.995008	3749	2	0.06251
FBgn0033679	6	0.047289	0.1324	0.994442	1857	3	-0.18361	0.14617	0.30107	0.995008	4465	1	-0.18361
FBgn0033358	6	0.047366	0.13257	0.994442	1858	3	-0.066596	0.15928	0.31927	0.995008	4742	2	-0.066596
FBgn0053510	6	0.047366	0.13257	0.994442	1859	3	-0.4167	0.70823	0.77838	0.999611	11858	1	-0.4167
FBgn0260766	6	0.047417	0.13268	0.994442	1860	4	-0.32482	0.77877	0.81197	0.999611	12508	1	-0.32482
FBgn0033980	6	0.047469	0.1328	0.994442	1861	4	-0.33504	0.82565	0.8397	0.999611	13040	1	-0.33504
FBgn0039009	6	0.047509	0.13289	0.994442	1862	3	-0.24724	0.87403	0.87564	0.999611	13641	1	-0.24724
FBgn0037504	6	0.047571	0.13304	0.994442	1863	4	-0.31381	0.7534	0.79895	0.999611	12271	1	-0.31381
FBgn0260856	6	0.047571	0.13304	0.994442	1864	4	-0.33503	0.055471	0.15144	0.995008	2217	2	-0.33503
FBgn0266411	8	0.047594	0.1485	0.994442	1865	4	-0.17734	0.19773	0.41083	0.995697	5514	2	-0.17734
FBgn0037664	6	0.047613	0.13313	0.994442	1866	4	-0.33577	0.89131	0.89125	0.999611	13899	1	-0.33577
FBgn0003326	6	0.047625	0.13316	0.994442	1867	2	-0.073804	0.18312	0.35202	0.995008	5212	2	-0.073804
FBgn0029663	4	0.04763	0.11299	0.994442	1868	3	-0.48768	0.77817	0.77753	0.999611	12506	0	-0.48768
FBgn0265706	4	0.04764	0.11301	0.994442	1869	1	0.46727	0.043517	0.10513	0.994904	1824	3	0.46727
FBgn0266008	4	0.04764	0.11301	0.994442	1870	1	0.17848	0.32568	0.46268	0.996647	7720	2	0.17848
FBgn0039970	6	0.047694	0.13331	0.994442	1871	2	-0.10134	0.17039	0.33447	0.995008	4953	2	-0.10134
FBgn0001124	6	0.047727	0.1334	0.994442	1872	3	-0.25441	0.29669	0.49222	0.996647	7309	2	-0.25441
FBgn0243486	6	0.047762	0.13348	0.994442	1873	3	-0.21382	0.94941	0.94928	0.999611	14809	0	-0.21382
FBgn0267759	4	0.047823	0.11338	0.994442	1874	1	-0.056149	0.73878	0.74051	0.999611	12107	1	-0.056149
intergenic	100	0.047885	0.28781	0.994442	1875	28	-0.11233	0.74611	0.98241	0.999611	12192	26	-0.11233
FBgn0050285	4	0.047913	0.11355	0.994442	1876	3	-0.44397	0.98487	0.98486	0.999611	15397	0	-0.44397
FBgn0046885	6	0.047971	0.13398	0.994442	1877	4	-0.61556	0.95925	0.95924	0.999611	14975	0	-0.61556
FBgn0030814	6	0.047971	0.13398	0.994442	1878	4	-0.37311	0.97096	0.9711	0.999611	15169	0	-0.37311
FBgn0265919	4	0.048033	0.11377	0.994442	1879	3	-0.47107	0.71812	0.72263	0.996911	11937	1	-0.47107
FBgn0035331	5	0.048096	0.12587	0.994442	1880	2	-0.27013	0.11422	0.24009	0.995008	3753	1	-0.27013
FBgn0266235	4	0.048098	0.11389	0.994442	1881	1	0.32407	0.018941	0.05305	0.990489	929	2	0.32407
FBgn0037577	6	0.048138	0.13435	0.994442	1882	2	0.030744	0.17962	0.34719	0.995008	5151	3	0.030744
FBgn0035793	6	0.048138	0.13435	0.994442	1883	2	-0.032958	0.48019	0.63355	0.996647	9538	2	-0.032958
FBgn0001125	2	0.048229	0.086098	0.994442	1884	1	-0.28907	0.23705	0.2721	0.995008	6301	1	-0.28907
FBgn0025352	6	0.048229	0.13457	0.994442	1885	4	-0.32867	0.49011	0.64154	0.996647	9658	2	-0.32867
FBgn0036621	6	0.048233	0.13458	0.994442	1886	3	-0.44528	0.062375	0.1669	0.995008	2438	2	-0.44528
FBgn0259166	6	0.048233	0.13458	0.994442	1887	3	-0.44593	0.98223	0.98225	0.999611	15344	0	-0.44593
FBgn0029686	6	0.048233	0.13458	0.994442	1888	3	-0.15475	0.036617	0.10797	0.994904	1596	2	-0.15475
FBgn0033658	6	0.048378	0.1349	0.994442	1889	2	-0.08062	0.011179	0.042763	0.98853	618	2	-0.08062
FBgn0038449	5	0.048386	0.12638	0.994442	1890	2	-0.9996	0.20368	0.36628	0.995008	5645	2	-0.9996
FBgn0036727	6	0.048436	0.13503	0.994442	1891	4	-0.28259	0.65897	0.75889	0.999611	11465	1	-0.28259
FBgn0034420	6	0.048442	0.13505	0.994442	1892	3	-0.23852	0.10563	0.24376	0.995008	3586	2	-0.23852
FBgn0051015	3	0.048454	0.10148	0.994442	1893	1	0.27642	0.0074513	0.020308	0.980433	427	2	0.27642
FBgn0030642	4	0.048529	0.11475	0.994442	1894	3	-0.47849	0.98837	0.98836	0.999763	15443	0	-0.47849
FBgn0001992	2	0.048565	0.086678	0.994442	1895	1	-0.33091	0.63556	0.63529	0.996647	11280	0	-0.33091
FBgn0036873	1	0.048569	0.048618	0.994442	1896	1	-0.81027	0.95143	0.95166	0.999611	14845	0	-0.81027
FBgn0264305	6	0.048602	0.13543	0.994442	1897	3	-0.37509	0.51927	0.66518	0.996647	10000	1	-0.37509
FBgn0085488	6	0.048618	0.13546	0.994442	1898	3	-0.12071	0.34649	0.52944	0.996647	7993	2	-0.12071
FBgn0264001	10	0.048634	0.16472	0.994442	1899	5	-0.21122	0.99893	0.9989	0.999874	15607	0	-0.21122
FBgn0266907	4	0.048644	0.11496	0.994442	1900	2	-0.70502	0.024983	0.066185	0.990489	1169	1	-0.70502
FBgn0031860	6	0.048674	0.1356	0.994442	1901	4	-0.31361	0.038551	0.11249	0.995008	1665	2	-0.31361
FBgn0004687	6	0.048674	0.1356	0.994442	1902	4	-0.30529	0.74497	0.79491	0.999611	12178	1	-0.30529
FBgn0004516	6	0.048823	0.13593	0.994442	1903	3	-0.5447	0.72131	0.78404	0.999611	11964	1	-0.5447
FBgn0028945	6	0.048846	0.13598	0.994442	1904	2	0.11766	0.51687	0.66324	0.996647	9973	2	0.11766
FBgn0267598	4	0.048924	0.11555	0.994442	1905	3	-0.63711	0.5734	0.61992	0.996647	10669	1	-0.63711
FBgn0050275	6	0.048949	0.13621	0.994442	1906	4	-0.88142	0.71332	0.78057	0.999611	11903	1	-0.88142
FBgn0004419	6	0.048949	0.13621	0.994442	1907	4	-0.37459	0.99813	0.99806	0.999874	15588	0	-0.37459
FBgn0030622	6	0.048949	0.13621	0.994442	1908	4	-0.35368	0.49438	0.64501	0.996647	9709	2	-0.35368
FBgn0266710	6	0.049028	0.1364	0.994442	1909	1	0.33201	0.0015029	0.0071433	0.980433	102	5	0.33201
FBgn0015001	6	0.049028	0.1364	0.994442	1910	2	-0.15668	0.32047	0.50978	0.996647	7651	2	-0.15668
FBgn0263992	4	0.049037	0.11577	0.994442	1911	2	-0.18936	0.44255	0.54798	0.996647	9102	1	-0.18936
FBgn0003279	3	0.049068	0.10235	0.994442	1912	2	-1.3074	0.15743	0.25318	0.995008	4705	1	-1.3074
FBgn0030012	6	0.049095	0.13654	0.994442	1913	4	-0.32327	0.85262	0.8585	0.999611	13378	1	-0.32327
FBgn0031318	6	0.049099	0.13655	0.994442	1914	3	0.074767	0.11496	0.25732	0.995008	3771	3	0.074767
FBgn0267814	4	0.049106	0.11592	0.994442	1915	1	-0.25998	0.84008	0.8395	0.999611	13225	0	-0.25998
FBgn0050356	6	0.049129	0.13662	0.994442	1916	4	-0.40263	0.76755	0.80609	0.999611	12398	1	-0.40263
FBgn0030584	6	0.049149	0.13667	0.994442	1917	3	-0.20926	0.19096	0.36251	0.995008	5374	2	-0.20926
FBgn0031801	6	0.049185	0.13674	0.994442	1918	4	-0.25635	0.10342	0.24057	0.995008	3546	1	-0.25635
FBgn0025802	6	0.049263	0.13692	0.994442	1919	4	-0.5758	0.31414	0.50507	0.996647	7552	2	-0.5758
FBgn0262572	6	0.049263	0.13692	0.994442	1920	4	-0.29573	0.94771	0.94754	0.999611	14787	0	-0.29573
FBgn0030269	5	0.049279	0.12799	0.994442	1921	3	-1.4385	0.70951	0.74329	0.999611	11870	1	-1.4385
FBgn0035145	6	0.04932	0.13703	0.994442	1922	3	-0.84057	0.90722	0.9069	0.999611	14149	0	-0.84057
FBgn0261054	6	0.04932	0.13703	0.994442	1923	3	-0.34888	0.58894	0.72376	0.996911	10872	1	-0.34888
FBgn0031474	6	0.049368	0.13715	0.994442	1924	4	-0.39025	0.88106	0.88175	0.999611	13754	1	-0.39025
FBgn0016076	8	0.049378	0.15309	0.994442	1925	5	-0.48818	0.99446	0.99441	0.999874	15535	0	-0.48818
FBgn0050108	6	0.049404	0.13724	0.994442	1926	1	0.38004	0.038015	0.11128	0.995008	1646	3	0.38004
FBgn0037520	6	0.049438	0.13732	0.994442	1927	3	-0.092243	0.16394	0.32566	0.995008	4850	3	-0.092243
FBgn0034964	6	0.049438	0.13732	0.994442	1928	2	-0.7165	0.88106	0.88175	0.999611	13756	1	-0.7165
FBgn0035575	6	0.049438	0.13732	0.994442	1929	2	-0.12012	0.87162	0.87359	0.999611	13611	1	-0.12012
FBgn0000499	6	0.049438	0.13732	0.994442	1930	2	-0.12445	0.10622	0.2446	0.995008	3596	3	-0.12445
FBgn0267220	4	0.049455	0.11666	0.994442	1931	3	-0.27663	0.90332	0.90292	0.999611	14084	0	-0.27663
FBgn0037358	6	0.049472	0.1374	0.994442	1932	2	-0.019901	0.7197	0.78334	0.999611	11949	1	-0.019901
FBgn0037040	6	0.049522	0.13752	0.994442	1933	4	-0.35709	0.60533	0.73813	0.999611	11058	1	-0.35709
FBgn0267365	5	0.04953	0.12845	0.994442	1934	2	0.17578	0.19749	0.36069	0.995008	5507	2	0.17578
FBgn0015037	6	0.049541	0.13756	0.994442	1935	2	-0.091228	0.55421	0.69429	0.996647	10446	2	-0.091228
FBgn0011666	10	0.049567	0.16736	0.994442	1936	2	0.084656	0.56969	0.77144	0.999611	10612	3	0.084656
FBgn0263454	4	0.049609	0.11698	0.994442	1937	2	-0.11647	0.11412	0.22636	0.995008	3751	2	-0.11647
FBgn0000591	6	0.049658	0.13783	0.994442	1938	4	-0.41826	0.99749	0.99744	0.999874	15578	0	-0.41826
FBgn0053348	6	0.049658	0.13783	0.994442	1939	4	-0.51427	0.38725	0.56053	0.996647	8483	1	-0.51427
FBgn0265974	6	0.049848	0.13826	0.994442	1940	1	0.17585	0.080544	0.20622	0.995008	2985	3	0.17585
FBgn0034402	6	0.049869	0.13831	0.994442	1941	3	-0.19192	0.12546	0.27223	0.995008	4006	2	-0.19192
FBgn0035312	6	0.049895	0.13837	0.994442	1942	4	-0.42867	0.4044	0.57391	0.996647	8681	1	-0.42867
FBgn0031848	6	0.049895	0.13837	0.994442	1943	4	-0.69474	0.86313	0.86671	0.999611	13507	1	-0.69474
FBgn0026375	8	0.049907	0.1544	0.994442	1944	5	-0.18908	0.25067	0.47369	0.996647	6553	1	-0.18908
FBgn0034232	5	0.049958	0.12923	0.994442	1945	2	-0.51821	0.84473	0.84511	0.999611	13275	1	-0.51821
FBgn0046323	6	0.049973	0.13854	0.994442	1946	3	0.019845	0.10726	0.24614	0.995008	3617	3	0.019845
FBgn0035010	6	0.050019	0.13865	0.994442	1947	1	0.2399	0.78563	0.81566	0.999611	12580	1	0.2399
FBgn0261709	4	0.050067	0.11788	0.994442	1948	3	-0.37338	0.92558	0.9252	0.999611	14437	0	-0.37338
FBgn0037671	6	0.050096	0.13883	0.994442	1949	4	-0.28708	0.57484	0.7117	0.996911	10689	1	-0.28708
FBgn0030945	5	0.050101	0.12947	0.994442	1950	2	-0.16735	0.42208	0.56887	0.996647	8867	2	-0.16735
FBgn0002856	6	0.05012	0.13888	0.994442	1951	3	-0.07547	0.29289	0.4894	0.996647	7255	2	-0.07547
FBgn0040261	6	0.05012	0.13888	0.994442	1952	2	0.60415	0.054799	0.14995	0.995008	2201	4	0.60415
FBgn0265693	4	0.050135	0.11801	0.994442	1953	3	-0.28411	0.28305	0.41514	0.995916	7130	1	-0.28411
FBgn0028936	3	0.050143	0.10387	0.994442	1954	1	-0.1879	0.76235	0.76226	0.999611	12360	0	-0.1879
FBgn0267481	4	0.050166	0.11807	0.994442	1955	2	-0.47479	0.36589	0.50717	0.996647	8218	1	-0.47479
FBgn0046706	6	0.050187	0.13902	0.994442	1956	4	-0.48125	0.73611	0.79079	0.999611	12088	1	-0.48125
FBgn0265308	4	0.050204	0.11816	0.994442	1957	2	-0.39524	0.82854	0.828	0.999611	13074	0	-0.39524
FBgn0043010	6	0.050292	0.13928	0.994442	1958	2	0.029412	0.27347	0.47083	0.996647	6979	3	0.029412
FBgn0267330	6	0.050384	0.13948	0.994442	1959	4	-0.36522	0.52828	0.67263	0.996647	10121	2	-0.36522
FBgn0052319	6	0.050462	0.13967	0.994442	1960	3	-0.58374	0.92276	0.92253	0.999611	14381	0	-0.58374
FBgn0028870	6	0.050462	0.13967	0.994442	1961	3	-0.58483	0.48473	0.63723	0.996647	9587	2	-0.58483
FBgn0028533	6	0.050462	0.13967	0.994442	1962	3	-0.36173	0.18266	0.35139	0.995008	5200	1	-0.36173
FBgn0263776	12	0.050462	0.17757	0.994442	1963	3	0.026735	0.55478	0.79162	0.999611	10453	3	0.026735
FBgn0052053	6	0.050497	0.13974	0.994442	1964	2	0.10194	0.7435	0.79424	0.999611	12167	1	0.10194
FBgn0264818	4	0.050531	0.11883	0.994442	1965	3	-0.65508	0.98571	0.9857	0.999763	15408	0	-0.65508
FBgn0263338	4	0.05057	0.1189	0.994442	1966	1	-0.27641	0.89795	0.89756	0.999611	14003	0	-0.27641
FBgn0266651	4	0.05057	0.1189	0.994442	1967	2	-0.82754	0.080478	0.17805	0.995008	2983	2	-0.82754
FBgn0033388	3	0.050593	0.10452	0.994442	1968	2	-0.43849	0.8987	0.89884	0.999611	14015	0	-0.43849
FBgn0016919	6	0.0506	0.13998	0.994442	1969	3	-0.51843	0.80341	0.82586	0.999611	12765	1	-0.51843
FBgn0038695	6	0.0506	0.13998	0.994442	1970	2	0.29176	0.68355	0.76839	0.999611	11648	1	0.29176
FBgn0032360	6	0.050623	0.14004	0.994442	1971	3	-0.073939	0.19303	0.36531	0.995008	5424	2	-0.073939
FBgn0035944	4	0.050661	0.11908	0.994442	1972	1	0.14351	0.19844	0.32094	0.995008	5536	2	0.14351
FBgn0003366	6	0.050692	0.14019	0.994442	1973	3	0.0051215	0.033285	0.099997	0.993883	1482	2	0.0051215
FBgn0033866	6	0.050696	0.1402	0.994442	1974	4	-0.39817	0.87789	0.87894	0.999611	13704	1	-0.39817
FBgn0267317	4	0.050751	0.11927	0.994442	1975	3	-0.65334	0.99067	0.99071	0.999763	15481	0	-0.65334
FBgn0053523	10	0.050798	0.17079	0.994442	1976	3	-0.14547	0.68183	0.8415	0.999611	11627	2	-0.14547
FBgn0065084	4	0.050867	0.11952	0.994442	1977	2	-0.1491	0.40344	0.52903	0.996647	8668	1	-0.1491
FBgn0036191	6	0.050872	0.14059	0.994442	1978	4	-0.44705	0.9986	0.99854	0.999874	15599	0	-0.44705
FBgn0035934	6	0.050873	0.1406	0.994442	1979	2	0.25993	0.18163	0.34993	0.995008	5185	3	0.25993
FBgn0038741	6	0.050873	0.1406	0.994442	1980	3	0.025244	0.19113	0.36274	0.995008	5379	3	0.025244
FBgn0086608	6	0.050873	0.1406	0.994442	1981	1	-0.011495	0.2131	0.39211	0.995008	5829	1	-0.011495
FBgn0032846	5	0.050904	0.13093	0.994442	1982	2	-0.078661	0.68272	0.7279	0.997904	11642	1	-0.078661
FBgn0266666	6	0.05091	0.14068	0.994442	1983	2	0.29016	0.064379	0.17138	0.995008	2495	3	0.29016
FBgn0261446	6	0.050953	0.14078	0.994442	1984	3	-0.2682	0.49845	0.64824	0.996647	9764	2	-0.2682
FBgn0034399	2	0.051032	0.090815	0.994442	1985	2	-0.50461	0.94897	0.94876	0.999611	14805	0	-0.50461
FBgn0037514	6	0.05118	0.14129	0.994442	1986	2	-0.19765	0.9698	0.96992	0.999611	15147	0	-0.19765
FBgn0023129	6	0.05118	0.14129	0.994442	1987	2	-0.0043484	0.48324	0.63601	0.996647	9573	1	-0.0043484
FBgn0004862	6	0.051184	0.14131	0.994442	1988	3	-0.36594	0.92575	0.92561	0.999611	14441	0	-0.36594
FBgn0025457	4	0.051193	0.12016	0.994442	1989	3	-0.59431	0.98762	0.98761	0.999763	15435	0	-0.59431
FBgn0052194	4	0.051193	0.12016	0.994442	1990	3	-0.3763	0.89711	0.89669	0.999611	13991	0	-0.3763
FBgn0038981	6	0.051231	0.14141	0.994442	1991	3	-0.16998	0.68217	0.76783	0.999611	11631	1	-0.16998
FBgn0038601	6	0.051298	0.14158	0.994442	1992	4	-0.31664	0.38604	0.5596	0.996647	8462	2	-0.31664
FBgn0026619	9	0.051344	0.16181	0.994442	1993	4	-0.20448	0.37478	0.61152	0.996647	8320	1	-0.20448
FBgn0035014	6	0.051351	0.14169	0.994442	1994	2	0.029895	0.036043	0.10664	0.994904	1572	2	0.029895
FBgn0259196	6	0.051398	0.14181	0.994442	1995	4	-0.24903	0.32958	0.51672	0.996647	7770	2	-0.24903
FBgn0262361	6	0.051421	0.14187	0.994442	1996	3	-0.054403	0.92552	0.92536	0.999611	14425	0	-0.054403
FBgn0036545	4	0.051429	0.12064	0.994442	1997	3	-0.62574	0.94063	0.94035	0.999611	14667	0	-0.62574
FBgn0039705	8	0.051429	0.15829	0.994442	1998	3	-0.014767	0.24994	0.47299	0.996647	6536	2	-0.014767
FBgn0032078	6	0.051453	0.14194	0.994442	1999	2	0.44405	0.058316	0.1579	0.995008	2311	3	0.44405
[truncated: 13,628 more rows]

## Sheet: S3A rep2
id	num	neg|score	neg|p-value	neg|fdr	neg|rank	neg|goodsgrna	neg|lfc	pos|score	pos|p-value	pos|fdr	pos|rank	pos|goodsgrna	pos|lfc
FBgn0015754	8	5.4532e-08	9.5037e-07	0.007426	1	5	-0.89861	0.33609	0.55367	0.993966	7748	1	-0.89861
FBgn0265798	4	1.0283e-07	3.1679e-07	0.00495	2	4	-2.3384	1	1	1	15627	0	-2.3384
FBgn0028491	6	6.3938e-07	2.8511e-06	0.013614	3	5	-1.4829	0.46235	0.6171	0.993966	9296	1	-1.4829
FBgn0000157	6	7.2476e-07	3.4847e-06	0.013614	4	2	0.046899	0.57033	0.70731	0.994741	10608	2	0.046899
FBgn0029896	9	1.9127e-06	1.8057e-05	0.040311	5	5	-0.66331	0.43316	0.65623	0.993966	8952	2	-0.66331
FBgn0003129	6	2.5192e-06	1.4256e-05	0.040311	6	4	-0.34316	0.029336	0.090024	0.986319	1306	1	-0.34316
FBgn0026439	6	3.1369e-06	1.679e-05	0.040311	7	4	-0.68202	0.96257	0.96262	0.999406	15037	0	-0.68202
FBgn0003886	6	4.7735e-06	2.566e-05	0.050124	8	3	-0.87945	0.59483	0.72872	0.99601	10877	1	-0.87945
FBgn0259789	5	8.7455e-06	4.0232e-05	0.065842	9	3	-0.84423	0.086466	0.19306	0.986319	3184	2	-0.84423
FBgn0260011	6	9.9208e-06	4.2133e-05	0.065842	10	4	-1.8233	0.95957	0.95961	0.999406	14984	0	-1.8233
FBgn0025687	6	1.6269e-05	7.5713e-05	0.107561	11	4	-1.0729	0.9135	0.91322	0.999406	14260	0	-1.0729
FBgn0085376	6	3.5655e-05	0.00018596	0.228104	12	2	0.17264	0.13231	0.27985	0.989381	4186	3	0.17264
FBgn0033051	6	3.6109e-05	0.00018976	0.228104	13	5	-1.3976	0.65022	0.75047	0.99601	11350	1	-1.3976
FBgn0062412	6	5.884e-05	0.00030634	0.320462	14	6	-1.6729	0.99994	0.99995	1	15626	0	-1.6729
FBgn0015544	6	5.9133e-05	0.0003076	0.320462	15	2	0.13132	0.11719	0.25836	0.989381	3871	3	0.13132
FBgn0263246	6	6.3566e-05	0.00033485	0.327042	16	6	-1.1563	0.99989	0.9999	1	15624	0	-1.1563
FBgn0004052	6	9.1101e-05	0.00048818	0.423817	17	4	-1.0412	0.7456	0.79159	0.997841	12219	1	-1.0412
FBgn0037936	5	9.1655e-05	0.00043052	0.395748	18	2	-0.19006	0.096257	0.20958	0.986319	3420	2	-0.19006
FBgn0029885	6	0.0001028	0.0005528	0.454664	19	6	-0.61239	0.9999	0.99991	1	15625	0	-0.61239
FBgn0004882	9	0.00011788	0.00079673	0.541326	20	6	-0.37975	0.5242	0.73172	0.99601	10044	1	-0.37975
FBgn0036102	6	0.00011799	0.0006339	0.471711	21	4	-0.65074	0.14994	0.30461	0.989381	4552	2	-0.65074
FBgn0037645	6	0.00014589	0.00078659	0.541326	22	2	-0.53001	0.96184	0.96189	0.999406	15020	0	-0.53001
FBgn0034394	6	0.00015701	0.00086642	0.541584	23	6	-0.35159	0.99984	0.99986	1	15623	0	-0.35159
FBgn0262479	6	0.00016481	0.00090887	0.546268	24	4	-0.69489	0.186	0.35463	0.992402	5310	1	-0.69489
FBgn0051840	4	0.0001661	0.00061236	0.471711	25	4	-0.86744	0.998	0.99801	0.999537	15595	0	-0.86744
FBgn0037217	6	0.00017827	0.00098617	0.570774	26	4	-0.44662	0.36954	0.54313	0.993966	8231	2	-0.44662
FBgn0052816	8	0.00018593	0.0012	0.646637	27	6	-0.59705	0.98365	0.98365	0.999406	15359	0	-0.59705
FBgn0011276	6	0.00019078	0.001059	0.591054	28	4	-0.6374	0.14024	0.29107	0.989381	4370	2	-0.6374
FBgn0265721	4	0.00023026	0.00084805	0.541584	29	4	-0.8093	0.99686	0.99685	0.999537	15575	0	-0.8093
FBgn0003257	6	0.00024956	0.0013657	0.706902	30	2	-0.30405	0.075121	0.19463	0.986319	2875	2	-0.30405
FBgn0041094	6	0.0002757	0.0015114	0.706902	31	5	-0.70209	0.97149	0.97161	0.999406	15181	0	-0.70209
FBgn0001180	6	0.00027748	0.0015184	0.706902	32	4	-0.62215	0.8982	0.89799	0.999406	14040	0	-0.62215
FBgn0035246	6	0.00030309	0.0016635	0.742716	33	4	-0.68212	0.94945	0.94933	0.999406	14824	0	-0.68212
FBgn0051361	8	0.00033334	0.0020338	0.811757	34	7	-0.67103	0.81686	0.87705	0.998831	12950	1	-0.67103
FBgn0039255	6	0.00037057	0.0020221	0.811757	35	2	0.17693	0.032464	0.097583	0.986319	1417	3	0.17693
FBgn0014179	6	0.00037057	0.0020221	0.811757	36	2	0.079034	0.1293	0.27566	0.989381	4136	3	0.079034
FBgn0027074	6	0.00038078	0.0020778	0.811757	37	5	-0.79597	0.99872	0.99868	0.999537	15613	0	-0.79597
FBgn0039452	6	0.00039215	0.0021393	0.815383	38	1	0.029932	0.51025	0.6563	0.993966	9864	2	0.029932
FBgn0261994	4	0.00042204	0.0015114	0.706902	39	3	-0.46159	0.85502	0.85456	0.998831	13419	0	-0.46159
FBgn0263118	6	0.00042955	0.0023275	0.84506	40	2	0.10088	0.11409	0.25382	0.989381	3803	2	0.10088
FBgn0003507	4	0.00043019	0.001538	0.706902	41	3	-0.88141	0.32796	0.46489	0.993966	7635	1	-0.88141
FBgn0036150	6	0.00046343	0.0024884	0.84506	42	2	-0.086746	0.94795	0.94778	0.999406	14798	0	-0.086746
FBgn0038460	8	0.00046444	0.0027494	0.876844	43	3	-0.41895	0.79421	0.86996	0.998831	12679	1	-0.41895
FBgn0035546	6	0.00047332	0.002541	0.84506	44	4	-0.55563	0.12175	0.26479	0.989381	3979	1	-0.55563
FBgn0037200	6	0.00047363	0.0025416	0.84506	45	4	-0.73454	0.90993	0.9096	0.999406	14201	0	-0.73454
FBgn0051703	6	0.0005114	0.0027197	0.876844	46	3	-0.44749	0.80553	0.8247	0.998831	12811	1	-0.44749
FBgn0024288	6	0.00053472	0.0028413	0.882644	47	3	-0.55478	0.9446	0.94442	0.999406	14728	0	-0.55478
FBgn0038583	4	0.00053589	0.0019175	0.811757	48	4	-0.54078	0.99946	0.99946	0.999781	15622	0	-0.54078
FBgn0031174	6	0.00054208	0.0028806	0.882644	49	4	-0.76544	0.073617	0.19136	0.986319	2836	2	-0.76544
FBgn0039358	6	0.00058079	0.0030738	0.906314	50	4	-0.67961	0.96317	0.96325	0.999406	15045	0	-0.67961
FBgn0010786	6	0.00061541	0.0032728	0.906663	51	3	-0.24801	0.023178	0.074739	0.986319	1066	2	-0.24801
FBgn0266254	4	0.00062184	0.0022299	0.829679	52	3	-0.83515	0.65549	0.67194	0.993966	11392	1	-0.83515
FBgn0265434	4	0.000685	0.0024535	0.84506	53	2	-0.66001	0.18926	0.30882	0.989381	5364	1	-0.66001
FBgn0053463	6	0.00070818	0.0037264	0.906663	54	3	-0.1989	0.94061	0.94053	0.999406	14668	0	-0.1989
FBgn0032024	6	0.00073243	0.0038303	0.906663	55	2	0.17578	0.27072	0.46724	0.993966	6874	3	0.17578
FBgn0032433	6	0.00074854	0.0039013	0.906663	56	4	-0.60084	0.95957	0.95961	0.999406	14989	0	-0.60084
FBgn0003525	6	0.00079735	0.0041066	0.906663	57	4	-0.46516	0.55006	0.68993	0.993966	10367	1	-0.46516
FBgn0041229	6	0.00081916	0.0041934	0.906663	58	4	-0.92518	0.34209	0.52195	0.993966	7843	2	-0.92518
FBgn0000212	4	0.00083171	0.0029712	0.892898	59	2	-0.67955	0.19133	0.31127	0.989381	5401	1	-0.67955
FBgn0013765	6	0.00085176	0.0043112	0.906663	60	3	-0.23064	0.67305	0.75948	0.996486	11540	1	-0.23064
FBgn0262623	6	0.00085925	0.0043385	0.906663	61	4	-0.64104	0.99061	0.99064	0.999406	15475	0	-0.64104
FBgn0000287	6	0.0008622	0.0043492	0.906663	62	5	-0.6468	0.50569	0.65256	0.993966	9805	1	-0.6468
FBgn0014465	6	0.00087945	0.0044272	0.906663	63	5	-0.59849	0.67048	0.75844	0.996486	11515	1	-0.59849
FBgn0036890	6	0.00088632	0.0044652	0.906663	64	3	-0.37303	0.81472	0.83051	0.998831	12919	1	-0.37303
FBgn0034718	10	0.00090924	0.0057374	0.906663	65	8	-0.37889	0.16453	0.38897	0.993966	4870	2	-0.37889
FBgn0267100	4	0.00091116	0.0032601	0.906663	66	3	-0.63915	0.5477	0.60081	0.993966	10327	1	-0.63915
FBgn0054015	6	0.00095155	0.0047148	0.906663	67	4	-0.6506	0.8712	0.87255	0.998831	13659	1	-0.6506
FBgn0039403	5	0.00095508	0.0042827	0.906663	68	4	-1.0266	0.63071	0.69622	0.993966	11186	1	-1.0266
FBgn0040318	6	0.00096443	0.0047769	0.906663	69	4	-0.71635	0.85329	0.85779	0.998831	13397	1	-0.71635
FBgn0267027	4	0.00097718	0.0034888	0.906663	70	4	-1.0526	0.99902	0.999	0.999544	15618	0	-1.0526
FBgn0265339	4	0.00098338	0.0035059	0.906663	71	3	-0.91745	0.89595	0.89553	0.999406	13993	0	-0.91745
FBgn0030313	6	0.00098553	0.0048574	0.906663	72	5	-0.61227	0.87787	0.8784	0.998831	13752	1	-0.61227
FBgn0035025	6	0.0010058	0.0049486	0.906663	73	4	-1.1127	0.58953	0.72402	0.99601	10816	1	-1.1127
FBgn0053144	6	0.0010089	0.0049606	0.906663	74	5	-0.45683	0.22538	0.40761	0.993966	6046	1	-0.45683
FBgn0033186	6	0.0010298	0.0050557	0.906663	75	4	-0.53421	0.84727	0.85322	0.998831	13317	1	-0.53421
FBgn0001142	6	0.0010501	0.0051254	0.906663	76	3	-0.95642	0.71349	0.77649	0.996486	11932	1	-0.95642
FBgn0053993	6	0.001076	0.0052236	0.906663	77	3	-0.61144	0.073149	0.19034	0.986319	2809	1	-0.61144
FBgn0041111	10	0.0010836	0.0067277	0.906663	78	7	-0.74409	0.53134	0.74256	0.99601	10138	1	-0.74409
FBgn0034829	6	0.0010964	0.0053091	0.906663	79	5	-0.9501	0.95308	0.953	0.999406	14882	0	-0.9501
FBgn0045468	6	0.0010964	0.0053091	0.906663	80	4	-1.2678	0.039793	0.11502	0.986319	1654	1	-1.2678
FBgn0038418	6	0.0010964	0.0053091	0.906663	81	4	-0.79004	0.96571	0.96578	0.999406	15087	0	-0.79004
FBgn0029959	6	0.0011048	0.0053395	0.906663	82	2	-0.0019344	0.46077	0.6158	0.993966	9282	2	-0.0019344
FBgn0036072	6	0.0011055	0.0053408	0.906663	83	5	-0.81239	0.71664	0.77793	0.996486	11959	1	-0.81239
FBgn0265705	4	0.0011167	0.0040039	0.906663	84	1	0.084642	0.23851	0.36435	0.993966	6291	2	0.084642
FBgn0029813	6	0.0011379	0.0054618	0.906663	85	4	-0.7232	0.83128	0.84168	0.998831	13100	1	-0.7232
FBgn0035529	6	0.0011384	0.0054624	0.906663	86	5	-0.79236	0.999	0.99899	0.999544	15617	0	-0.79236
FBgn0032163	4	0.0011623	0.0041858	0.906663	87	3	-0.71111	0.71324	0.71736	0.99601	11927	1	-0.71111
FBgn0040496	6	0.0011643	0.0055777	0.906663	88	5	-0.60999	0.95246	0.95237	0.999406	14871	0	-0.60999
FBgn0085313	6	0.0011894	0.0056772	0.906663	89	4	-0.54515	0.33494	0.51638	0.993966	7734	1	-0.54515
FBgn0032945	6	0.0012648	0.0059959	0.906663	90	4	-0.61911	0.62719	0.74197	0.99601	11160	1	-0.61911
FBgn0029105	6	0.0012768	0.0060377	0.906663	91	3	-0.18863	0.69733	0.76945	0.996486	11771	1	-0.18863
FBgn0259682	6	0.001284	0.0060669	0.906663	92	5	-0.70488	0.99844	0.99838	0.999537	15604	0	-0.70488
FBgn0265177	6	0.001284	0.0060669	0.906663	93	5	-0.63671	0.99357	0.99357	0.999537	15530	0	-0.63671
FBgn0032897	6	0.0013264	0.0062303	0.906663	94	5	-0.53974	0.99805	0.99799	0.999537	15597	0	-0.53974
FBgn0035872	6	0.0013582	0.0063608	0.906663	95	3	-0.23885	0.61716	0.73836	0.99601	11072	1	-0.23885
FBgn0085303	6	0.0013849	0.0064603	0.906663	96	4	-0.96078	0.96735	0.96741	0.999406	15115	0	-0.96078
FBgn0043364	5	0.0013893	0.0061613	0.906663	97	4	-0.83021	0.81639	0.81841	0.998831	12944	1	-0.83021
FBgn0265956	4	0.0013915	0.0049853	0.906663	98	4	-0.74713	0.99861	0.99859	0.999537	15610	0	-0.74713
FBgn0031560	4	0.0013924	0.0049872	0.906663	99	2	-0.59049	0.97728	0.97721	0.999406	15264	0	-0.59049
FBgn0266929	4	0.0014255	0.0051159	0.906663	100	3	-0.77348	0.99187	0.99193	0.999406	15501	0	-0.77348
FBgn0046696	4	0.0014569	0.0052147	0.906663	101	3	-0.80447	0.9042	0.9038	0.999406	14117	0	-0.80447
FBgn0263023	6	0.0014617	0.0067853	0.906663	102	4	-0.50318	0.23487	0.4203	0.993966	6221	1	-0.50318
FBgn0004554	6	0.0014712	0.006831	0.906663	103	4	-0.5362	0.46926	0.62267	0.993966	9390	2	-0.5362
FBgn0265575	7	0.0014925	0.0075526	0.906663	104	5	-0.99644	0.71601	0.81441	0.998831	11956	1	-0.99644
FBgn0261709	4	0.0014945	0.0053617	0.906663	105	3	-0.79645	0.17099	0.28817	0.989381	5005	1	-0.79645
FBgn0051157	6	0.0015084	0.0069856	0.906663	106	3	-0.59539	0.53537	0.67731	0.993966	10178	2	-0.59539
FBgn0036160	6	0.0015197	0.0070337	0.906663	107	3	-0.30495	0.33712	0.51808	0.993966	7758	2	-0.30495
FBgn0264827	4	0.0015282	0.0054916	0.906663	108	4	-0.62287	0.99847	0.99847	0.999537	15606	0	-0.62287
FBgn0267752	4	0.0015282	0.0054916	0.906663	109	4	-0.64654	0.99847	0.99847	0.999537	15607	0	-0.64654
FBgn0261554	8	0.0015431	0.008318	0.928465	110	4	-0.0055282	0.10875	0.26854	0.989381	3695	4	-0.0055282
FBgn0003423	9	0.00155	0.0085822	0.92849	111	2	0.17636	0.12744	0.3156	0.989381	4089	4	0.17636
FBgn0002524	6	0.0015583	0.0071782	0.906663	112	4	-0.6646	0.53405	0.6762	0.993966	10169	2	-0.6646
FBgn0031275	7	0.0015618	0.0078789	0.906663	113	3	-0.32271	0.98675	0.98676	0.999406	15413	0	-0.32271
FBgn0031768	6	0.0016034	0.0073511	0.906663	114	2	-0.064215	0.17689	0.34221	0.992402	5116	2	-0.064215
FBgn0267192	4	0.0016143	0.0057773	0.906663	115	2	-1.2052	0.90059	0.90019	0.999406	14070	0	-1.2052
FBgn0262109	4	0.0016267	0.0058185	0.906663	116	3	-0.48185	0.65592	0.67228	0.993966	11395	1	-0.48185
FBgn0039429	6	0.0016624	0.0075748	0.906663	117	2	-0.45681	0.0069682	0.027758	0.986319	394	2	-0.45681
FBgn0261618	9	0.0016762	0.0092297	0.92849	118	5	-0.49983	0.8099	0.8945	0.999406	12858	2	-0.49983
FBgn0259209	8	0.0016955	0.0089839	0.92849	119	4	-0.2883	0.13072	0.30512	0.989381	4159	1	-0.2883
FBgn0031430	6	0.0016973	0.0077116	0.906663	120	3	-0.48319	0.60515	0.73417	0.99601	10983	1	-0.48319
FBgn0050377	6	0.0016978	0.0077142	0.906663	121	5	-0.64387	0.0055849	0.022752	0.986319	319	1	-0.64387
FBgn0052296	6	0.0017405	0.0078624	0.906663	122	5	-0.44023	0.67425	0.75999	0.996486	11553	1	-0.44023
FBgn0002522	6	0.0017457	0.0078846	0.906663	123	5	-0.64668	0.98235	0.98237	0.999406	15342	0	-0.64668
FBgn0030053	5	0.0017617	0.0077484	0.906663	124	5	-0.52888	0.99824	0.99824	0.999537	15600	0	-0.52888
FBgn0267236	6	0.0017623	0.0079486	0.906663	125	3	-0.57887	0.87678	0.87742	0.998831	13735	1	-0.57887
FBgn0002775	4	0.0017814	0.0063881	0.906663	126	3	-0.63913	0.90986	0.90955	0.999406	14198	0	-0.63913
FBgn0005638	6	0.0018068	0.0081311	0.920756	127	5	-0.61897	0.98732	0.98733	0.999406	15421	0	-0.61897
FBgn0037130	6	0.0018437	0.0082787	0.928465	128	5	-0.57896	0.92965	0.92948	0.999406	14501	0	-0.57896
FBgn0264383	4	0.0018615	0.0066612	0.906663	129	3	-0.64087	0.28162	0.41272	0.993966	7039	1	-0.64087
FBgn0026577	3	0.0018785	0.0053332	0.906663	130	3	-0.73781	0.99812	0.99816	0.999537	15599	0	-0.73781
FBgn0036990	6	0.0018883	0.0084561	0.92849	131	1	-0.16918	0.87615	0.87687	0.998831	13724	1	-0.16918
FBgn0265736	4	0.0018921	0.0067644	0.906663	132	4	-1.3128	0.99767	0.99766	0.999537	15588	0	-1.3128
FBgn0038799	6	0.0019595	0.0087615	0.92849	133	4	-0.29688	0.98267	0.98268	0.999406	15345	0	-0.29688
FBgn0266249	4	0.0019853	0.0070914	0.906663	134	3	-0.93716	0.96473	0.96454	0.999406	15067	0	-0.93716
FBgn0259150	6	0.0019953	0.0089142	0.92849	135	3	-0.26809	0.015973	0.056305	0.986319	795	2	-0.26809
FBgn0000071	6	0.0020307	0.0090548	0.92849	136	1	0.16283	0.12301	0.26658	0.989381	4006	3	0.16283
FBgn0029067	6	0.0020608	0.0091556	0.92849	137	3	-0.13804	0.82233	0.83554	0.998831	13005	1	-0.13804
FBgn0264494	6	0.0020716	0.0092012	0.92849	138	4	-0.56117	0.58645	0.72133	0.99601	10782	1	-0.56117
FBgn0050145	6	0.0020769	0.009224	0.92849	139	3	-0.40541	0.03413	0.10159	0.986319	1465	2	-0.40541
FBgn0004244	8	0.0020827	0.010643	0.937309	140	6	-0.4532	0.28164	0.50023	0.993966	7040	2	-0.4532
FBgn0037371	6	0.0021018	0.0093216	0.92849	141	3	-0.49498	0.57695	0.71307	0.99601	10669	2	-0.49498
FBgn0029932	6	0.002115	0.0093723	0.92849	142	5	-0.43732	0.99747	0.99743	0.999537	15584	0	-0.43732
FBgn0020269	6	0.0021416	0.0094812	0.92849	143	4	-0.52768	0.8482	0.85393	0.998831	13326	1	-0.52768
FBgn0265793	4	0.0021498	0.0076806	0.906663	144	3	-0.60781	0.38826	0.51616	0.993966	8429	1	-0.60781
FBgn0267160	4	0.0021614	0.0077212	0.906663	145	2	-0.33134	0.61235	0.64161	0.993966	11032	1	-0.33134
FBgn0039481	6	0.002173	0.0096168	0.92849	146	2	-0.17232	0.31532	0.50134	0.993966	7469	2	-0.17232
FBgn0027539	4	0.0021738	0.0077699	0.906663	147	3	-0.88626	0.98442	0.98442	0.999406	15368	0	-0.88626
FBgn0039402	3	0.0021782	0.0061404	0.906663	148	2	-0.74598	0.38775	0.44322	0.993966	8419	1	-0.74598
FBgn0264890	4	0.002186	0.0078086	0.906663	149	4	-0.40558	0.99781	0.99782	0.999537	15591	0	-0.40558
FBgn0062440	6	0.0021943	0.0096998	0.92849	150	2	-0.20328	0.37739	0.54935	0.993966	8320	1	-0.20328
FBgn0040260	6	0.0022068	0.0097524	0.92849	151	4	-0.66482	0.32513	0.50889	0.993966	7591	2	-0.66482
FBgn0266414	4	0.0022168	0.0079277	0.906663	152	2	-1.3665	0.79906	0.7986	0.998502	12740	0	-1.3665
FBgn0001250	6	0.0022215	0.0098056	0.92849	153	3	-0.48794	0.14914	0.30349	0.989381	4541	3	-0.48794
FBgn0030114	6	0.0022254	0.0098272	0.92849	154	4	-0.62732	0.70659	0.77341	0.996486	11856	1	-0.62732
FBgn0010497	5	0.0022265	0.0097093	0.92849	155	4	-0.63918	0.70115	0.73524	0.99601	11815	1	-0.63918
FBgn0016687	3	0.0022825	0.006416	0.906663	156	3	-0.48776	0.99772	0.99775	0.999537	15590	0	-0.48776
FBgn0004592	6	0.0022867	0.010061	0.92849	157	4	-0.49699	0.64812	0.74966	0.99601	11330	1	-0.49699
FBgn0085447	14	0.0022869	0.014583	0.937309	158	5	-0.14787	0.54265	0.7916	0.997841	10260	3	-0.14787
FBgn0039311	6	0.0022971	0.010101	0.92849	159	3	-0.041271	0.054191	0.14828	0.986319	2176	3	-0.041271
FBgn0053483	6	0.0023079	0.010141	0.92849	160	4	-0.54619	0.50823	0.65466	0.993966	9842	1	-0.54619
FBgn0031258	6	0.0023154	0.010168	0.92849	161	2	0.19942	0.089936	0.21825	0.986319	3279	2	0.19942
FBgn0017551	5	0.0023215	0.010108	0.92849	162	4	-0.38485	0.94566	0.94585	0.999406	14757	0	-0.38485
FBgn0011774	6	0.0023619	0.010347	0.929242	163	5	-0.8318	0.89453	0.89436	0.999406	13970	0	-0.8318
FBgn0050456	8	0.0023659	0.011829	0.937309	164	3	-0.24111	0.064749	0.19142	0.986319	2531	3	-0.24111
FBgn0267210	4	0.0023987	0.0085657	0.92849	165	1	0.056006	0.093601	0.20016	0.986319	3365	1	0.056006
FBgn0010263	8	0.002422	0.012047	0.937309	166	4	-0.36629	0.072915	0.20619	0.986319	2808	2	-0.36629
FBgn0264878	4	0.0024461	0.0087387	0.92849	167	1	-0.033126	0.19846	0.31924	0.989381	5538	2	-0.033126
FBgn0038490	5	0.0024602	0.010636	0.937309	168	2	0.2534	0.052522	0.13422	0.986319	2120	3	0.2534
FBgn0041225	6	0.0024726	0.01081	0.937309	169	4	-0.92052	0.9446	0.94442	0.999406	14729	0	-0.92052
FBgn0267768	4	0.002494	0.0088838	0.92849	170	4	-0.49644	0.99751	0.99752	0.999537	15585	0	-0.49644
FBgn0026144	6	0.002515	0.010981	0.937309	171	5	-1.406	0.84018	0.84806	0.998831	13219	1	-1.406
FBgn0036654	6	0.0025289	0.011034	0.937309	172	4	-0.48546	0.87711	0.87772	0.998831	13745	1	-0.48546
FBgn0038737	6	0.002533	0.011051	0.937309	173	5	-0.70428	0.31001	0.49738	0.993966	7397	1	-0.70428
FBgn0035702	6	0.002533	0.011051	0.937309	174	4	-0.66349	0.82186	0.83521	0.998831	12998	1	-0.66349
FBgn0005640	9	0.0025355	0.01353	0.937309	175	6	-0.40314	0.066865	0.19761	0.986319	2594	1	-0.40314
FBgn0036732	6	0.0025526	0.011134	0.937309	176	4	-0.86352	0.24191	0.42963	0.993966	6361	1	-0.86352
FBgn0040989	6	0.0025751	0.011229	0.937309	177	4	-0.39494	0.15967	0.31829	0.989381	4770	1	-0.39494
FBgn0052660	4	0.0025843	0.0091778	0.92849	178	3	-0.45403	0.76955	0.76894	0.996486	12439	1	-0.45403
FBgn0035286	6	0.0026444	0.011507	0.937309	179	5	-0.85212	0.52576	0.66919	0.993966	10066	1	-0.85212
FBgn0030499	6	0.0026444	0.011507	0.937309	180	3	-0.58389	0.1781	0.34383	0.992402	5137	2	-0.58389
FBgn0037778	6	0.0026668	0.011598	0.937309	181	5	-0.62253	0.20165	0.37603	0.993966	5599	1	-0.62253
FBgn0033638	7	0.0026814	0.013073	0.937309	182	6	-0.589	0.95316	0.95311	0.999406	14887	0	-0.589
FBgn0011837	3	0.0026896	0.0075406	0.906663	183	1	0.25459	0.20142	0.31138	0.989381	5595	2	0.25459
FBgn0267555	3	0.0027253	0.0076445	0.906663	184	3	-0.41557	0.99727	0.99731	0.999537	15581	0	-0.41557
FBgn0260453	2	0.002746	0.005285	0.906663	185	2	-1.5278	0.99725	0.99719	0.999537	15580	0	-1.5278
FBgn0000360	6	0.0027562	0.011963	0.937309	186	4	-0.4753	0.14219	0.2937	0.989381	4405	1	-0.4753
FBgn0015797	6	0.00279	0.012097	0.937309	187	2	0.0013356	0.36347	0.53852	0.993966	8156	1	0.0013356
FBgn0036920	6	0.0028042	0.012152	0.937309	188	3	-0.33116	0.46077	0.6158	0.993966	9280	1	-0.33116
FBgn0052602	6	0.0028296	0.01224	0.937309	189	5	-0.39254	0.90118	0.90097	0.999406	14077	0	-0.39254
FBgn0030576	6	0.0028612	0.01235	0.937309	190	4	-1.3661	0.54975	0.68969	0.993966	10359	2	-1.3661
FBgn0053795	6	0.0028795	0.012413	0.937309	191	4	-0.60932	0.654	0.75196	0.99601	11378	1	-0.60932
FBgn0265955	4	0.0028941	0.010259	0.92849	192	3	-0.88932	0.11845	0.2285	0.98878	3898	1	-0.88932
FBgn0033996	4	0.0028979	0.010271	0.92849	193	4	-0.54359	0.9971	0.99709	0.999537	15578	0	-0.54359
FBgn0265200	4	0.0028997	0.010279	0.92849	194	4	-1.0992	0.9971	0.99709	0.999537	15577	0	-1.0992
FBgn0003415	6	0.0029259	0.012602	0.937309	195	5	-0.89108	0.99927	0.99929	0.999671	15620	0	-0.89108
FBgn0039010	6	0.0029259	0.012602	0.937309	196	5	-0.43066	0.17571	0.34055	0.992402	5099	1	-0.43066
FBgn0262081	8	0.0029463	0.014315	0.937309	197	5	-0.52583	0.60907	0.76039	0.996486	11015	2	-0.52583
FBgn0032632	6	0.0029859	0.012844	0.937309	198	5	-1.2095	0.8982	0.89799	0.999406	14037	0	-1.2095
FBgn0040794	6	0.0030684	0.013163	0.937309	199	5	-0.46309	0.74344	0.79056	0.997775	12199	1	-0.46309
FBgn0029965	5	0.0030767	0.0126	0.937309	200	3	-0.64131	0.46589	0.61057	0.993966	9339	1	-0.64131
FBgn0259986	6	0.0030926	0.013267	0.937309	201	3	-0.21616	0.16139	0.32063	0.989381	4807	2	-0.21616
FBgn0260940	6	0.003098	0.013287	0.937309	202	4	-0.60516	0.72744	0.78284	0.996699	12054	1	-0.60516
FBgn0063649	7	0.0031311	0.015054	0.937309	203	3	-0.2252	0.48194	0.65578	0.993966	9541	2	-0.2252
FBgn0034152	6	0.0031692	0.013551	0.937309	204	2	-0.47255	0.54738	0.68767	0.993966	10324	1	-0.47255
FBgn0033702	6	0.0032272	0.013782	0.937309	205	4	-0.54345	0.44428	0.60241	0.993966	9084	1	-0.54345
FBgn0263967	4	0.0032448	0.011475	0.937309	206	3	-1.5333	0.98842	0.98844	0.999406	15440	0	-1.5333
FBgn0029723	6	0.0032533	0.013888	0.937309	207	3	-0.0052991	0.11051	0.24843	0.989381	3731	3	-0.0052991
FBgn0265654	4	0.0032563	0.011508	0.937309	208	3	-0.58628	0.8485	0.84802	0.998831	13332	0	-0.58628
FBgn0262530	6	0.0032857	0.014012	0.937309	209	4	-0.80081	0.84491	0.85146	0.998831	13284	1	-0.80081
FBgn0267827	4	0.0033	0.011648	0.937309	210	2	-0.30907	0.32635	0.46304	0.993966	7607	1	-0.30907
FBgn0034946	6	0.0033114	0.014127	0.937309	211	3	-0.67791	0.8769	0.87754	0.998831	13739	1	-0.67791
FBgn0260795	6	0.0033475	0.014262	0.937309	212	4	-0.63741	0.022079	0.071961	0.986319	1024	1	-0.63741
FBgn0265865	4	0.0033601	0.011837	0.937309	213	3	-0.52596	0.70397	0.70956	0.99601	11839	1	-0.52596
FBgn0031575	6	0.0033688	0.014359	0.937309	214	5	-0.50664	0.99856	0.99851	0.999537	15609	0	-0.50664
FBgn0051813	6	0.0033688	0.014359	0.937309	215	5	-0.44367	0.41595	0.57976	0.993966	8774	1	-0.44367
FBgn0023526	5	0.0033957	0.013599	0.937309	216	4	-0.58943	0.9248	0.92505	0.999406	14428	0	-0.58943
FBgn0263452	4	0.003401	0.011957	0.937309	217	3	-0.72577	0.59021	0.62715	0.993966	10820	1	-0.72577
FBgn0027348	6	0.0034101	0.014509	0.937309	218	5	-0.49749	0.99791	0.99786	0.999537	15593	0	-0.49749
FBgn0261841	2	0.0034319	0.006549	0.906663	219	2	-0.7773	0.98609	0.98599	0.999406	15403	0	-0.7773
FBgn0051288	6	0.0034536	0.014679	0.937309	220	2	-0.074919	0.32989	0.51257	0.993966	7664	2	-0.074919
FBgn0261058	6	0.0034644	0.014717	0.937309	221	2	-0.15523	0.50476	0.65175	0.993966	9791	2	-0.15523
FBgn0029529	4	0.0035196	0.012365	0.937309	222	4	-0.87374	0.99539	0.9954	0.999537	15557	0	-0.87374
FBgn0011576	6	0.0035269	0.014966	0.937309	223	4	-0.90852	0.97366	0.97373	0.999406	15216	0	-0.90852
FBgn0000719	6	0.0035277	0.014969	0.937309	224	5	-0.82545	0.96396	0.96404	0.999406	15057	0	-0.82545
FBgn0039071	6	0.0035277	0.014969	0.937309	225	5	-0.99108	0.99854	0.99849	0.999537	15608	0	-0.99108
FBgn0011722	6	0.003541	0.015012	0.937309	226	3	-0.52327	0.38048	0.55177	0.993966	8348	2	-0.52327
FBgn0267809	4	0.0035521	0.012455	0.937309	227	2	-0.82092	0.91185	0.91158	0.999406	14235	0	-0.82092
FBgn0261387	6	0.0035665	0.015115	0.937309	228	3	-0.22276	0.42035	0.58336	0.993966	8814	2	-0.22276
FBgn0000489	6	0.0035958	0.015236	0.937309	229	5	-0.49506	0.20002	0.37377	0.993966	5572	1	-0.49506
FBgn0030931	6	0.0035958	0.015236	0.937309	230	5	-0.47182	0.054826	0.14977	0.986319	2196	1	-0.47182
FBgn0260439	6	0.0035958	0.015236	0.937309	231	5	-0.46327	0.80822	0.82639	0.998831	12832	1	-0.46327
FBgn0264865	4	0.0036084	0.01263	0.937309	232	4	-0.46249	0.99639	0.99641	0.999537	15571	0	-0.46249
FBgn0053129	10	0.0036219	0.018794	0.937309	233	6	-0.32733	0.99058	0.99079	0.999406	15470	0	-0.32733
FBgn0261953	9	0.0036225	0.018728	0.937309	234	6	-0.48598	0.6342	0.79574	0.997902	11219	1	-0.48598
FBgn0264830	6	0.0036233	0.015347	0.937309	235	5	-0.69309	0.51157	0.65739	0.993966	9881	1	-0.69309
FBgn0264431	4	0.0036793	0.012873	0.937309	236	2	-0.37816	0.63356	0.65625	0.993966	11212	1	-0.37816
FBgn0028993	6	0.0037122	0.015681	0.937309	237	5	-0.42317	0.99889	0.99887	0.999544	15615	0	-0.42317
FBgn0036723	6	0.0037122	0.015681	0.937309	238	5	-0.70748	0.814	0.83008	0.998831	12906	1	-0.70748
FBgn0031609	4	0.003715	0.013001	0.937309	239	2	-0.51796	0.8123	0.81182	0.998831	12885	0	-0.51796
FBgn0038651	6	0.003738	0.015777	0.937309	240	1	0.16917	0.13651	0.28584	0.989381	4273	3	0.16917
FBgn0037574	5	0.003739	0.014666	0.937309	241	4	-0.68892	0.99756	0.99755	0.999537	15586	0	-0.68892
FBgn0263449	4	0.0037631	0.013154	0.937309	242	2	-0.68748	0.95383	0.95364	0.999406	14896	0	-0.68748
FBgn0037147	6	0.003775	0.015911	0.937309	243	5	-1.1195	0.99927	0.99929	0.999671	15621	0	-1.1195
FBgn0039420	6	0.003775	0.015911	0.937309	244	5	-0.62612	0.95348	0.95341	0.999406	14889	0	-0.62612
FBgn0033945	6	0.0038067	0.016026	0.937309	245	5	-0.37906	0.51157	0.65739	0.993966	9883	1	-0.37906
FBgn0004430	6	0.0038091	0.016034	0.937309	246	2	-0.17653	0.19393	0.36543	0.993966	5459	1	-0.17653
FBgn0033079	6	0.0038483	0.016194	0.937309	247	4	-0.79884	0.45076	0.6077	0.993966	9151	1	-0.79884
FBgn0005677	5	0.0038544	0.015016	0.937309	248	4	-0.36291	0.92069	0.92091	0.999406	14357	0	-0.36291
FBgn0027795	6	0.0038866	0.016342	0.937309	249	4	-0.44082	0.8991	0.8989	0.999406	14049	0	-0.44082
FBgn0033627	6	0.0038921	0.016359	0.937309	250	2	0.26316	0.10696	0.2433	0.989381	3655	3	0.26316
FBgn0039020	6	0.0038971	0.016383	0.937309	251	5	-0.54239	0.9946	0.99462	0.999537	15549	0	-0.54239
FBgn0036311	6	0.0038971	0.016383	0.937309	252	5	-0.43345	0.21924	0.39953	0.993966	5930	1	-0.43345
FBgn0039380	6	0.0039094	0.016425	0.937309	253	3	-0.62748	0.58377	0.71904	0.99601	10748	2	-0.62748
FBgn0030251	6	0.0039169	0.016453	0.937309	254	3	0.036692	0.11517	0.2554	0.989381	3825	3	0.036692
FBgn0039767	3	0.0039348	0.010926	0.937309	255	2	-0.66588	0.92504	0.92512	0.999406	14434	0	-0.66588
FBgn0032266	6	0.0039513	0.016581	0.937309	256	4	-0.63229	0.5683	0.70556	0.994741	10587	2	-0.63229
FBgn0037815	6	0.0039543	0.016595	0.937309	257	4	-1.3215	0.43283	0.59339	0.993966	8949	2	-1.3215
FBgn0061197	4	0.0039762	0.013869	0.937309	258	3	-1.064	0.38328	0.51376	0.993966	8375	1	-1.064
FBgn0032870	6	0.0039819	0.016707	0.937309	259	3	-0.44759	0.3529	0.53025	0.993966	8015	2	-0.44759
FBgn0266817	4	0.0039871	0.013905	0.937309	260	2	-0.31361	0.65549	0.67194	0.993966	11394	1	-0.31361
FBgn0031287	6	0.0040083	0.016804	0.937309	261	2	0.13501	0.46825	0.62181	0.993966	9372	1	0.13501
FBgn0038733	6	0.0040223	0.016862	0.937309	262	1	-0.16345	0.58431	0.71952	0.99601	10753	2	-0.16345
FBgn0016726	6	0.0040586	0.017002	0.937309	263	3	-0.34448	0.13363	0.28176	0.989381	4216	2	-0.34448
FBgn0013771	3	0.0040622	0.011292	0.937309	264	3	-1.1764	0.99594	0.99601	0.999537	15565	0	-1.1764
FBgn0032086	6	0.0040934	0.017134	0.937309	265	3	-0.30281	0.51157	0.65739	0.993966	9882	1	-0.30281
FBgn0266402	4	0.0041882	0.014591	0.937309	266	3	-1.4418	0.45738	0.55062	0.993966	9244	1	-1.4418
FBgn0260936	6	0.0042148	0.01759	0.937309	267	5	-0.48708	0.99846	0.9984	0.999537	15605	0	-0.48708
FBgn0039045	6	0.0042167	0.017598	0.937309	268	5	-1.4066	0.98502	0.98504	0.999406	15376	0	-1.4066
FBgn0033692	6	0.0042293	0.017634	0.937309	269	5	-0.52497	0.77746	0.80823	0.998831	12522	1	-0.52497
FBgn0035238	6	0.0042355	0.01766	0.937309	270	3	-0.41921	0.654	0.75196	0.99601	11381	1	-0.41921
FBgn0039609	6	0.0042469	0.017709	0.937309	271	3	-0.3891	0.64022	0.74676	0.99601	11280	1	-0.3891
FBgn0086681	4	0.0042518	0.014801	0.937309	272	3	-0.84859	0.26384	0.3928	0.993966	6750	1	-0.84859
FBgn0263657	4	0.0042518	0.014801	0.937309	273	3	-1.1049	0.65813	0.6739	0.993966	11409	1	-1.1049
FBgn0039177	6	0.0042849	0.017852	0.937309	274	3	-0.62781	0.7519	0.79478	0.997841	12288	1	-0.62781
FBgn0000180	6	0.0042886	0.017872	0.937309	275	3	-0.29755	0.23831	0.42488	0.993966	6287	2	-0.29755
FBgn0030836	6	0.0042886	0.017872	0.937309	276	2	-0.43606	0.93409	0.93393	0.999406	14569	0	-0.43606
FBgn0026386	6	0.0043066	0.01794	0.937309	277	2	-0.021072	0.46832	0.62187	0.993966	9380	2	-0.021072
FBgn0053548	8	0.0043089	0.019868	0.937309	278	3	-0.25907	0.12357	0.29347	0.989381	4014	3	-0.25907
FBgn0038476	8	0.0043113	0.019876	0.937309	279	5	-0.48686	0.99273	0.99274	0.999516	15521	0	-0.48686
FBgn0283651	7	0.0043352	0.019851	0.937309	280	3	-0.55707	0.97252	0.97258	0.999406	15202	0	-0.55707
FBgn0262984	6	0.0043359	0.018045	0.937309	281	5	-0.64089	0.99834	0.99829	0.999537	15602	0	-0.64089
FBgn0052194	4	0.0043459	0.015111	0.937309	282	3	-0.66157	0.4846	0.56507	0.993966	9566	1	-0.66157
FBgn0028527	6	0.0043776	0.018192	0.937309	283	2	0.61151	0.0067905	0.027146	0.986319	384	4	0.61151
FBgn0031399	6	0.0044027	0.018275	0.937309	284	4	-0.81626	0.027038	0.084267	0.986319	1219	1	-0.81626
FBgn0003882	6	0.0044487	0.018462	0.937309	285	1	0.2617	0.077038	0.19872	0.986319	2945	4	0.2617
FBgn0037098	6	0.0045064	0.018673	0.937309	286	5	-1.688	0.8769	0.87754	0.998831	13741	1	-1.688
FBgn0043002	6	0.0045107	0.01869	0.937309	287	4	-0.24286	0.9358	0.9357	0.999406	14590	0	-0.24286
FBgn0028561	6	0.0045681	0.018903	0.937309	288	5	-0.55892	0.99347	0.99348	0.999537	15528	0	-0.55892
FBgn0038539	6	0.004569	0.018907	0.937309	289	3	-0.31681	0.14382	0.29598	0.989381	4430	1	-0.31681
FBgn0053182	3	0.0045901	0.012733	0.937309	290	2	-1.0542	0.92478	0.92487	0.999406	14424	0	-1.0542
FBgn0011661	14	0.0046067	0.026618	0.954966	291	5	-0.55983	0.41921	0.70735	0.994741	8800	3	-0.55983
FBgn0262167	6	0.0046136	0.019075	0.937309	292	3	-0.39718	0.59483	0.72872	0.99601	10879	1	-0.39718
FBgn0015615	6	0.0046449	0.019195	0.937309	293	4	-0.76191	0.44062	0.59957	0.993966	9045	1	-0.76191
FBgn0262569	6	0.0046449	0.019195	0.937309	294	4	-0.80559	0.97149	0.97161	0.999406	15179	0	-0.80559
FBgn0038115	6	0.004647	0.019206	0.937309	295	4	-0.49561	0.5967	0.7304	0.99601	10904	1	-0.49561
FBgn0032943	6	0.0046927	0.019368	0.937309	296	5	-0.53826	0.97766	0.97775	0.999406	15274	0	-0.53826
FBgn0011706	16	0.0047093	0.028439	0.954966	297	6	-0.03238	0.32052	0.63028	0.993966	7536	6	-0.03238
FBgn0267580	4	0.0047219	0.016394	0.937309	298	1	-0.1567	0.15439	0.26935	0.989381	4652	1	-0.1567
FBgn0264516	6	0.0047328	0.019494	0.937309	299	4	-0.49378	0.5984	0.73183	0.99601	10927	1	-0.49378
FBgn0002838	6	0.0047328	0.019494	0.937309	300	3	-0.40656	0.030325	0.092447	0.986319	1341	2	-0.40656
FBgn0030925	6	0.0047328	0.019494	0.937309	301	4	-0.80325	0.19381	0.36529	0.993966	5457	1	-0.80325
FBgn0264374	4	0.0047693	0.016559	0.937309	302	2	-0.61542	0.77882	0.77818	0.996486	12542	0	-0.61542
FBgn0038584	6	0.0047728	0.019664	0.937309	303	4	-0.49965	0.9857	0.98572	0.999406	15391	0	-0.49965
FBgn0085386	6	0.0047988	0.019757	0.937309	304	4	-0.49832	0.14029	0.29113	0.989381	4371	2	-0.49832
FBgn0037672	6	0.0048039	0.019781	0.937309	305	2	-0.083293	0.89926	0.89907	0.999406	14052	0	-0.083293
FBgn0047038	6	0.0048304	0.019878	0.937309	306	2	-0.17748	0.5268	0.67008	0.993966	10083	2	-0.17748
FBgn0001967	6	0.004832	0.019884	0.937309	307	3	-0.32535	0.16628	0.32738	0.989381	4905	2	-0.32535
FBgn0031144	6	0.0048507	0.019959	0.937309	308	3	-0.03228	0.54947	0.68947	0.993966	10342	1	-0.03228
FBgn0028496	6	0.0048539	0.019973	0.937309	309	4	-0.4926	0.044506	0.12608	0.986319	1826	2	-0.4926
FBgn0054054	6	0.0048883	0.020089	0.939897	310	4	-0.6469	0.91956	0.91924	0.999406	14341	0	-0.6469
FBgn0027950	4	0.0049461	0.017162	0.937309	311	4	-0.28002	0.99505	0.99506	0.999537	15555	0	-0.28002
FBgn0003527	4	0.0050061	0.017326	0.937309	312	2	-0.55835	0.67571	0.68706	0.993966	11564	1	-0.55835
FBgn0003862	6	0.0050169	0.020557	0.950739	313	3	-0.19954	0.26715	0.46258	0.993966	6810	1	-0.19954
FBgn0031876	6	0.0050342	0.02062	0.950739	314	4	-0.40913	0.52626	0.66961	0.993966	10076	1	-0.40913
FBgn0039008	6	0.0050427	0.020647	0.950739	315	3	-0.24701	0.24519	0.43399	0.993966	6425	2	-0.24701
FBgn0051373	6	0.0050483	0.020673	0.950739	316	3	-0.35922	0.66006	0.7543	0.996319	11428	1	-0.35922
FBgn0036663	9	0.0050664	0.024753	0.954966	317	5	-0.26541	0.98082	0.98075	0.999406	15323	0	-0.26541
FBgn0262787	6	0.0050956	0.020838	0.950739	318	3	0.036312	0.07442	0.19309	0.986319	2860	3	0.036312
FBgn0033112	6	0.005096	0.020839	0.950739	319	5	-0.65925	0.76832	0.80331	0.998831	12430	1	-0.65925
FBgn0037206	5	0.0051164	0.019028	0.937309	320	2	-0.030391	0.67137	0.71796	0.99601	11526	1	-0.030391
FBgn0038168	4	0.0051239	0.017727	0.937309	321	3	-0.90969	0.90271	0.90231	0.999406	14102	0	-0.90969
FBgn0029131	6	0.0051264	0.020954	0.950739	322	5	-0.31586	0.97983	0.97986	0.999406	15302	0	-0.31586
FBgn0037550	6	0.0051373	0.02099	0.950739	323	3	-0.12555	0.028919	0.088996	0.986319	1289	3	-0.12555
FBgn0266250	4	0.0051818	0.017924	0.937309	324	2	-0.41846	0.62794	0.65236	0.993966	11162	1	-0.41846
FBgn0037203	8	0.0052173	0.02357	0.954966	325	6	-0.5709	0.12388	0.294	0.989381	4021	2	-0.5709
FBgn0025635	3	0.0052294	0.014459	0.937309	326	2	-0.57199	0.0963	0.16951	0.986319	3421	1	-0.57199
FBgn0261270	6	0.0052379	0.021392	0.953581	327	5	-0.36603	0.99489	0.99491	0.999537	15553	0	-0.36603
FBgn0037227	6	0.0052672	0.021514	0.953581	328	5	-0.43201	0.79715	0.81962	0.998831	12719	1	-0.43201
FBgn0033855	6	0.0052782	0.021557	0.953581	329	5	-0.78021	0.99101	0.99101	0.999406	15483	0	-0.78021
FBgn0037577	6	0.005326	0.02173	0.953581	330	3	-0.45618	0.26348	0.45779	0.993966	6740	2	-0.45618
FBgn0038772	6	0.0053338	0.021754	0.953581	331	4	-0.75285	0.69887	0.77013	0.996486	11787	1	-0.75285
FBgn0053725	4	0.0053343	0.018407	0.937309	332	4	-0.50722	0.99467	0.9947	0.999537	15551	0	-0.50722
FBgn0266147	4	0.0053343	0.018407	0.937309	333	4	-0.76208	0.99467	0.9947	0.999537	15550	0	-0.76208
FBgn0050285	4	0.0053376	0.018417	0.937309	334	1	0.041678	0.54239	0.59759	0.993966	10258	1	0.041678
FBgn0030853	6	0.0053595	0.021851	0.953581	335	3	-0.29595	0.63298	0.74411	0.99601	11208	1	-0.29595
FBgn0034766	6	0.0053728	0.021901	0.953581	336	3	-0.46613	0.79657	0.81926	0.998831	12710	1	-0.46613
FBgn0031853	6	0.0053764	0.021919	0.953581	337	5	-0.41976	0.96021	0.96026	0.999406	15000	0	-0.41976
FBgn0267126	4	0.005385	0.018572	0.937309	338	2	-0.70465	0.98736	0.98736	0.999406	15422	0	-0.70465
FBgn0026394	6	0.0054062	0.022029	0.953581	339	3	-0.57985	0.072546	0.18904	0.986319	2795	1	-0.57985
FBgn0001085	6	0.0054542	0.022199	0.954966	340	4	-0.63491	0.9613	0.96133	0.999406	15015	0	-0.63491
FBgn0036142	4	0.0054712	0.018856	0.937309	341	4	-0.53946	0.99453	0.99456	0.999537	15548	0	-0.53946
FBgn0039738	3	0.005473	0.015119	0.937309	342	3	-0.79561	0.99453	0.9946	0.999537	15547	0	-0.79561
FBgn0024897	6	0.005516	0.022434	0.954966	343	4	-0.512	0.07207	0.18806	0.986319	2782	2	-0.512
FBgn0003380	14	0.0055447	0.031271	0.9707	344	6	-0.072716	0.83424	0.9384	0.999406	13144	3	-0.072716
FBgn0036451	8	0.0055488	0.024867	0.954966	345	3	-0.074957	0.63832	0.77813	0.996486	11265	1	-0.074957
FBgn0034576	6	0.0055576	0.022586	0.954966	346	5	-0.4465	0.9749	0.97494	0.999406	15232	0	-0.4465
FBgn0002525	4	0.0055709	0.019199	0.937309	347	3	-0.88737	0.16868	0.28555	0.989381	4957	1	-0.88737
FBgn0052107	6	0.0055814	0.022679	0.954966	348	5	-0.56406	0.99834	0.99829	0.999537	15603	0	-0.56406
FBgn0267313	4	0.0055951	0.019278	0.937309	349	4	-0.59978	0.9944	0.99444	0.999537	15542	0	-0.59978
FBgn0004584	4	0.0056217	0.019373	0.937309	350	2	-0.8998	0.17099	0.28817	0.989381	5002	1	-0.8998
FBgn0052432	6	0.0056559	0.022952	0.954966	351	1	-0.033921	0.31351	0.49999	0.993966	7447	2	-0.033921
FBgn0034614	4	0.0056576	0.019491	0.937309	352	4	-0.42887	0.99434	0.99438	0.999537	15540	0	-0.42887
FBgn0032824	6	0.005662	0.02298	0.954966	353	5	-0.32818	0.98057	0.98061	0.999406	15321	0	-0.32818
FBgn0263855	6	0.0056766	0.023046	0.954966	354	5	-0.42163	0.99715	0.99712	0.999537	15579	0	-0.42163
FBgn0262607	6	0.0057034	0.023138	0.954966	355	4	-0.84803	0.9908	0.99083	0.999406	15480	0	-0.84803
FBgn0265979	4	0.0057164	0.019712	0.937309	356	3	-0.42655	0.97195	0.9717	0.999406	15187	0	-0.42655
FBgn0262127	6	0.0057269	0.023208	0.954966	357	1	0.03231	0.23719	0.42342	0.993966	6271	2	0.03231
FBgn0013762	6	0.0057496	0.023297	0.954966	358	5	-0.32017	0.84967	0.85503	0.998831	13348	1	-0.32017
FBgn0024973	6	0.0057547	0.023316	0.954966	359	4	-0.51448	0.98779	0.98781	0.999406	15429	0	-0.51448
FBgn0033065	6	0.0057547	0.023316	0.954966	360	3	-0.088803	0.2737	0.47003	0.993966	6928	2	-0.088803
FBgn0086655	9	0.0058146	0.027647	0.954966	361	3	-0.38741	0.10078	0.27104	0.989381	3520	4	-0.38741
FBgn0052264	12	0.0058265	0.03099	0.9707	362	7	-0.42973	0.96218	0.9736	0.999406	15028	1	-0.42973
FBgn0000140	6	0.0058511	0.02368	0.954966	363	4	-0.36036	0.4499	0.60699	0.993966	9137	1	-0.36036
FBgn0032101	4	0.0058664	0.020208	0.942678	364	4	-0.43694	0.99413	0.99417	0.999537	15535	0	-0.43694
FBgn0040239	6	0.0058688	0.02374	0.954966	365	2	-0.55333	0.44183	0.6005	0.993966	9059	1	-0.55333
FBgn0050467	6	0.0058694	0.023741	0.954966	366	4	-0.37192	0.55428	0.69353	0.993966	10421	1	-0.37192
FBgn0030191	6	0.0058849	0.023801	0.954966	367	4	-0.61262	0.99417	0.99418	0.999537	15536	0	-0.61262
FBgn0260460	6	0.00589	0.02382	0.954966	368	4	-0.50469	0.99061	0.99064	0.999406	15474	0	-0.50469
FBgn0086444	6	0.0058959	0.023843	0.954966	369	5	-0.51593	0.47178	0.6247	0.993966	9412	1	-0.51593
FBgn0260794	5	0.0058969	0.021514	0.953581	370	3	-0.50601	0.42991	0.57548	0.993966	8918	1	-0.50601
FBgn0038744	6	0.0059211	0.023936	0.954966	371	3	-0.44828	0.57231	0.70902	0.995689	10627	2	-0.44828
FBgn0265637	3	0.0059249	0.016307	0.937309	372	1	-0.12792	0.85096	0.85076	0.998831	13364	0	-0.12792
FBgn0033809	6	0.0059274	0.023957	0.954966	373	5	-0.64324	0.97062	0.97074	0.999406	15170	0	-0.64324
FBgn0027607	6	0.0059316	0.023976	0.954966	374	4	-0.73561	0.9498	0.94966	0.999406	14829	0	-0.73561
FBgn0034269	6	0.00601	0.024263	0.954966	375	5	-0.44589	0.99127	0.99128	0.999406	15490	0	-0.44589
FBgn0033179	6	0.0060107	0.024264	0.954966	376	2	-0.52982	0.89651	0.89631	0.999406	14001	0	-0.52982
FBgn0011766	10	0.0060996	0.029814	0.966298	377	4	0.15572	0.051705	0.17332	0.986319	2086	5	0.15572
FBgn0031132	6	0.0061166	0.02464	0.954966	378	4	-0.31049	0.018258	0.062271	0.986319	876	2	-0.31049
FBgn0051632	6	0.0061526	0.024771	0.954966	379	1	-0.10767	0.024072	0.076943	0.986319	1113	1	-0.10767
FBgn0034622	6	0.0061819	0.024884	0.954966	380	3	-0.13048	0.58588	0.72084	0.99601	10773	2	-0.13048
FBgn0037105	3	0.0062228	0.017089	0.937309	381	2	-0.79491	0.32468	0.40257	0.993966	7589	1	-0.79491
FBgn0050197	6	0.0062235	0.025038	0.954966	382	2	0.0067116	0.46659	0.62049	0.993966	9345	2	0.0067116
FBgn0032693	6	0.0062315	0.025067	0.954966	383	4	-0.3963	0.30869	0.49637	0.993966	7384	2	-0.3963
FBgn0266864	4	0.006237	0.021401	0.953581	384	1	-0.18458	0.56158	0.60916	0.993966	10500	1	-0.18458
FBgn0037000	6	0.0062539	0.025148	0.954966	385	4	-0.32235	0.47317	0.62581	0.993966	9435	2	-0.32235
FBgn0030440	6	0.0062945	0.025292	0.954966	386	3	-0.55478	0.87925	0.87964	0.998915	13770	1	-0.55478
FBgn0010407	6	0.0062971	0.025304	0.954966	387	5	-0.41239	0.99892	0.9989	0.999544	15616	0	-0.41239
FBgn0037759	6	0.0063045	0.025333	0.954966	388	4	-0.64939	0.91076	0.91048	0.999406	14219	0	-0.64939
FBgn0034389	8	0.0063055	0.027944	0.954966	389	2	0.14532	0.31159	0.52966	0.993966	7422	3	0.14532
FBgn0039304	4	0.0063439	0.021744	0.953581	390	4	-0.53009	0.99366	0.99367	0.999537	15531	0	-0.53009
FBgn0010097	6	0.0063537	0.025505	0.954966	391	3	-0.36013	0.16873	0.33076	0.989381	4958	2	-0.36013
FBgn0026056	6	0.0063537	0.025505	0.954966	392	3	-0.55939	0.44428	0.60241	0.993966	9085	1	-0.55939
FBgn0011701	6	0.0063654	0.025559	0.954966	393	4	-1.169	0.082006	0.20644	0.986319	3074	2	-1.169
FBgn0045476	6	0.0063789	0.025613	0.954966	394	5	-0.4564	0.9902	0.99023	0.999406	15463	0	-0.4564
FBgn0264262	4	0.0063803	0.021875	0.953581	395	2	-0.16292	0.014022	0.041569	0.986319	727	2	-0.16292
FBgn0050384	6	0.0063806	0.025618	0.954966	396	4	-0.74436	0.52783	0.67098	0.993966	10097	1	-0.74436
FBgn0032680	6	0.0063806	0.025618	0.954966	397	4	-0.4175	0.66322	0.75557	0.996486	11453	1	-0.4175
FBgn0031786	6	0.0063876	0.025652	0.954966	398	5	-0.84645	0.99791	0.99786	0.999537	15594	0	-0.84645
FBgn0267087	4	0.0064263	0.022021	0.953581	399	2	-0.51927	0.21257	0.33525	0.990735	5809	1	-0.51927
FBgn0267336	6	0.0064364	0.02584	0.954966	400	3	-0.18118	0.31718	0.50274	0.993966	7485	1	-0.18118
FBgn0035390	5	0.0064818	0.023245	0.954966	401	4	-0.51048	0.99492	0.99494	0.999537	15554	0	-0.51048
FBgn0038262	5	0.0064818	0.023245	0.954966	402	4	-0.62006	0.82045	0.822	0.998831	12983	1	-0.62006
FBgn0036279	6	0.0064838	0.026013	0.954966	403	5	-0.34454	0.99031	0.99034	0.999406	15465	0	-0.34454
FBgn0034920	6	0.0064933	0.026042	0.954966	404	2	-0.39947	0.47893	0.63048	0.993966	9507	2	-0.39947
FBgn0266964	4	0.0064941	0.022241	0.954966	405	2	-0.17529	0.3377	0.47572	0.993966	7776	2	-0.17529
FBgn0038789	6	0.00653	0.026153	0.954966	406	3	-0.20216	0.25917	0.45227	0.993966	6658	3	-0.20216
FBgn0083981	6	0.0065427	0.026194	0.954966	407	3	-0.213	0.0069682	0.027758	0.986319	397	2	-0.213
FBgn0030812	6	0.0065427	0.026194	0.954966	408	3	-0.1723	0.5984	0.73183	0.99601	10928	1	-0.1723
FBgn0001978	6	0.00656	0.026252	0.954966	409	3	-0.3318	0.94047	0.94038	0.999406	14663	0	-0.3318
FBgn0031047	6	0.0066491	0.026547	0.954966	410	3	-0.28378	0.91076	0.91048	0.999406	14218	0	-0.28378
FBgn0026598	4	0.0066573	0.022731	0.954966	411	4	-0.36571	0.99334	0.99337	0.999537	15526	0	-0.36571
FBgn0036496	6	0.0066837	0.026681	0.954966	412	3	-0.036456	0.78864	0.81452	0.998831	12626	1	-0.036456
FBgn0265276	12	0.0067047	0.03501	0.991081	413	8	-0.44366	0.3693	0.64045	0.993966	8228	3	-0.44366
FBgn0039697	4	0.0067481	0.023015	0.954966	414	4	-0.39711	0.99325	0.99328	0.999537	15525	0	-0.39711
FBgn0035078	6	0.0067662	0.027005	0.954966	415	3	-0.36187	0.58617	0.7211	0.99601	10777	2	-0.36187
FBgn0037828	6	0.006769	0.027013	0.954966	416	4	-0.56079	0.99238	0.99243	0.999406	15517	0	-0.56079
FBgn0039644	6	0.0067804	0.027054	0.954966	417	5	-0.30973	0.98511	0.98513	0.999406	15381	0	-0.30973
FBgn0030417	6	0.0067909	0.027097	0.954966	418	3	-0.44066	0.67663	0.76094	0.996486	11573	1	-0.44066
FBgn0085316	6	0.0068407	0.027262	0.954966	419	3	-0.57635	0.4917	0.64099	0.993966	9643	2	-0.57635
FBgn0024249	6	0.0068619	0.027337	0.954966	420	2	0.046169	0.78864	0.81452	0.998831	12637	1	0.046169
FBgn0262486	6	0.0068664	0.02735	0.954966	421	4	-0.81764	0.50014	0.64794	0.993966	9744	1	-0.81764
FBgn0010226	8	0.0069007	0.030324	0.967094	422	2	0.27304	0.12451	0.29499	0.989381	4037	4	0.27304
FBgn0032647	6	0.0069328	0.027586	0.954966	423	2	0.056228	0.50424	0.65133	0.993966	9790	2	0.056228
FBgn0034910	6	0.0069531	0.027654	0.954966	424	4	-0.26856	0.3185	0.50376	0.993966	7506	1	-0.26856
FBgn0039135	6	0.0069561	0.027664	0.954966	425	4	-0.57923	0.066973	0.1769	0.986319	2597	2	-0.57923
FBgn0034784	6	0.0070036	0.027838	0.954966	426	3	-0.26228	0.48614	0.63646	0.993966	9588	2	-0.26228
FBgn0033104	6	0.0070219	0.027914	0.954966	427	4	-0.38491	0.92997	0.92982	0.999406	14506	0	-0.38491
FBgn0036427	6	0.0070752	0.028107	0.954966	428	5	-0.38374	0.18456	0.35273	0.992402	5272	1	-0.38374
FBgn0015609	6	0.0070757	0.028108	0.954966	429	2	0.49585	0.0012742	0.0061492	0.969686	88	4	0.49585
FBgn0016059	6	0.0070851	0.028143	0.954966	430	3	-0.16156	0.32036	0.50518	0.993966	7530	2	-0.16156
FBgn0033980	6	0.0070851	0.028143	0.954966	431	3	-0.35384	0.8338	0.84346	0.998831	13133	1	-0.35384
FBgn0053309	6	0.0070868	0.028148	0.954966	432	5	-0.26955	0.99787	0.99782	0.999537	15592	0	-0.26955
FBgn0038975	7	0.0070976	0.029325	0.960718	433	4	-0.47166	0.26174	0.46099	0.993966	6705	2	-0.47166
FBgn0034515	6	0.0071189	0.028278	0.954966	434	4	-0.97631	0.96735	0.96741	0.999406	15105	0	-0.97631
FBgn0035439	6	0.0071189	0.028278	0.954966	435	4	-0.63586	0.41252	0.57709	0.993966	8722	1	-0.63586
FBgn0259247	6	0.0071362	0.028357	0.954966	436	5	-0.55553	0.72094	0.77986	0.996486	11998	1	-0.55553
FBgn0001145	6	0.0071891	0.028545	0.954966	437	2	0.06719	0.017109	0.059232	0.986319	841	3	0.06719
FBgn0001233	5	0.0071995	0.025366	0.954966	438	1	-0.063554	0.85603	0.8563	0.998831	13430	0	-0.063554
FBgn0039283	6	0.0072014	0.028589	0.954966	439	4	-0.54775	0.75203	0.79486	0.997841	12291	1	-0.54775
FBgn0035699	6	0.0072163	0.028634	0.954966	440	1	0.31459	0.10458	0.23987	0.989381	3606	3	0.31459
FBgn0036494	6	0.0072627	0.028805	0.954966	441	3	-0.32891	0.45483	0.61098	0.993966	9205	2	-0.32891
FBgn0052988	6	0.0072872	0.028878	0.954966	442	2	0.030548	0.16469	0.32518	0.989381	4872	3	0.030548
FBgn0031155	6	0.0072922	0.028891	0.954966	443	3	-0.10669	0.64236	0.74754	0.99601	11293	1	-0.10669
FBgn0000052	8	0.0073042	0.031977	0.977709	444	5	-0.23926	0.95936	0.95946	0.999406	14981	0	-0.23926
FBgn0034663	6	0.007319	0.028994	0.954966	445	3	-0.33604	0.18723	0.3563	0.993728	5330	2	-0.33604
FBgn0040607	6	0.007328	0.029027	0.954966	446	4	-0.50671	0.50615	0.65295	0.993966	9811	1	-0.50671
FBgn0005624	6	0.0073515	0.029108	0.955602	447	2	0.20229	0.080487	0.20418	0.986319	3032	2	0.20229
FBgn0261503	4	0.007402	0.025119	0.954966	448	3	-0.70687	0.98065	0.98063	0.999406	15322	0	-0.70687
FBgn0052847	6	0.0074475	0.029466	0.963306	449	3	-0.38855	0.71113	0.7754	0.996486	11896	1	-0.38855
FBgn0023083	5	0.0074599	0.026125	0.954966	450	3	-0.32966	0.09431	0.20631	0.986319	3378	1	-0.32966
FBgn0034335	6	0.0074947	0.029649	0.966298	451	5	-0.61229	0.80083	0.82186	0.998831	12756	1	-0.61229
FBgn0026738	6	0.007558	0.029903	0.966298	452	4	-0.83374	0.86966	0.87125	0.998831	13635	1	-0.83374
FBgn0004390	6	0.0075658	0.029934	0.966298	453	3	-0.58837	0.86367	0.86621	0.998831	13554	1	-0.58837
FBgn0029134	6	0.0075707	0.029954	0.966298	454	2	-0.092046	0.25359	0.44497	0.993966	6571	2	-0.092046
FBgn0266396	4	0.0075891	0.025735	0.954966	455	3	-0.45164	0.98391	0.98389	0.999406	15362	0	-0.45164
FBgn0038134	6	0.0075974	0.030055	0.966298	456	5	-0.53155	0.90157	0.90134	0.999406	14083	0	-0.53155
FBgn0267463	4	0.0076085	0.0258	0.954966	457	2	-0.2829	0.10894	0.21777	0.986319	3698	1	-0.2829
FBgn0259708	2	0.0076276	0.014322	0.937309	458	2	-0.92113	0.94368	0.94346	0.999406	14713	0	-0.92113
FBgn0266410	6	0.007636	0.030217	0.966298	459	4	-1.2118	0.30776	0.49569	0.993966	7371	1	-1.2118
FBgn0028425	6	0.007641	0.030235	0.966298	460	5	-0.60498	0.89893	0.89872	0.999406	14048	0	-0.60498
FBgn0034739	6	0.0076415	0.030237	0.966298	461	3	-0.20673	0.77519	0.80697	0.998831	12502	1	-0.20673
FBgn0037533	2	0.0076998	0.014454	0.937309	462	2	-0.67277	0.9923	0.99216	0.999406	15514	0	-0.67277
FBgn0262577	6	0.0077124	0.030473	0.967275	463	5	-0.57039	0.94195	0.94185	0.999406	14683	0	-0.57039
FBgn0035947	6	0.0077171	0.030496	0.967275	464	3	-0.22861	0.18425	0.35229	0.992402	5265	2	-0.22861
FBgn0264296	6	0.0077231	0.030516	0.967275	465	3	-0.41307	0.98511	0.98513	0.999406	15382	0	-0.41307
FBgn0028738	6	0.0077421	0.030585	0.967299	466	5	-0.45522	0.6208	0.73966	0.99601	11102	1	-0.45522
FBgn0042098	6	0.0077832	0.03074	0.967299	467	1	-0.12692	0.38198	0.5529	0.993966	8366	2	-0.12692
FBgn0020307	6	0.007784	0.030743	0.967299	468	3	-0.82949	0.90835	0.90801	0.999406	14167	0	-0.82949
FBgn0039126	6	0.0077895	0.030764	0.967299	469	5	-0.4607	0.28485	0.47846	0.993966	7076	1	-0.4607
FBgn0267581	4	0.0077976	0.026415	0.954966	470	2	-0.45762	0.87825	0.87782	0.998831	13760	0	-0.45762
FBgn0044048	6	0.0078718	0.031073	0.9707	471	3	-0.19308	0.37543	0.54782	0.993966	8297	2	-0.19308
FBgn0003116	6	0.0079173	0.03123	0.9707	472	5	-0.62595	0.98739	0.9874	0.999406	15423	0	-0.62595
FBgn0026315	6	0.0079173	0.03123	0.9707	473	5	-0.3202	0.98353	0.98356	0.999406	15357	0	-0.3202
FBgn0029521	6	0.0079249	0.031252	0.9707	474	2	0.1326	0.23862	0.42526	0.993966	6292	2	0.1326
FBgn0266049	3	0.0079344	0.021609	0.953581	475	3	-1.4308	0.99207	0.99219	0.999406	15508	0	-1.4308
FBgn0002945	6	0.0079409	0.031307	0.9707	476	4	-0.69873	0.18714	0.35619	0.993728	5329	1	-0.69873
FBgn0036417	5	0.0080213	0.027813	0.954966	477	3	-0.24701	0.15069	0.29842	0.989381	4575	2	-0.24701
FBgn0033539	6	0.0080219	0.031619	0.97638	478	3	-0.51729	0.87615	0.87687	0.998831	13720	1	-0.51729
FBgn0035886	6	0.0080406	0.031678	0.97638	479	3	-0.5487	0.7635	0.80077	0.998831	12391	1	-0.5487
FBgn0265835	6	0.0082083	0.032255	0.977709	480	3	-0.32152	0.34015	0.52046	0.993966	7813	1	-0.32152
FBgn0265156	4	0.0082112	0.027567	0.954966	481	3	-0.64702	0.20611	0.32792	0.989381	5675	1	-0.64702
FBgn0030725	6	0.0082159	0.032281	0.977709	482	5	-0.53216	0.34695	0.52567	0.993966	7910	1	-0.53216
FBgn0262100	6	0.0082159	0.032281	0.977709	483	5	-0.4914	0.96478	0.96483	0.999406	15070	0	-0.4914
FBgn0043791	6	0.0082428	0.032375	0.977709	484	3	-0.37644	0.075823	0.19615	0.986319	2902	1	-0.37644
FBgn0027070	6	0.0082592	0.032424	0.977709	485	3	-0.14845	0.54128	0.68245	0.993966	10244	1	-0.14845
FBgn0036146	6	0.0082794	0.032489	0.977709	486	5	-0.3958	0.0081374	0.032042	0.986319	461	1	-0.3958
FBgn0265078	4	0.0083105	0.027802	0.954966	487	2	0.013413	0.14608	0.2599	0.989381	4478	2	0.013413
FBgn0031606	6	0.0083433	0.032698	0.977709	488	5	-0.53844	0.25796	0.45073	0.993966	6638	1	-0.53844
FBgn0037609	6	0.0083499	0.032717	0.977709	489	2	0.16357	0.068594	0.18048	0.986319	2660	3	0.16357
FBgn0263504	4	0.008385	0.027976	0.954966	490	3	-0.60778	0.77238	0.77174	0.996486	12466	0	-0.60778
FBgn0262887	4	0.008385	0.027976	0.954966	491	3	-1.057	0.97547	0.97533	0.999406	15242	0	-1.057
FBgn0035977	6	0.0084423	0.03305	0.983753	492	5	-0.39768	0.99649	0.99647	0.999537	15573	0	-0.39768
FBgn0034145	10	0.0084655	0.039932	0.991081	493	1	0.079764	0.15293	0.36876	0.993966	4619	5	0.079764
FBgn0050391	6	0.0085437	0.033408	0.986428	494	4	-0.50189	0.93344	0.93327	0.999406	14553	0	-0.50189
FBgn0040253	6	0.0085515	0.03344	0.986428	495	4	-0.85856	0.98793	0.98797	0.999406	15431	0	-0.85856
FBgn0052406	6	0.0085547	0.033455	0.986428	496	3	-0.40659	0.71899	0.77898	0.996486	11978	1	-0.40659
FBgn0263654	2	0.0085746	0.016107	0.937309	497	1	-0.77111	0.82667	0.82605	0.998831	13054	0	-0.77111
FBgn0265087	4	0.0086008	0.028489	0.954966	498	2	-0.29124	0.28699	0.41869	0.993966	7102	1	-0.29124
FBgn0027580	6	0.0086531	0.03378	0.991081	499	3	-0.42685	0.44364	0.60192	0.993966	9079	2	-0.42685
FBgn0001083	8	0.0087145	0.03754	0.991081	500	4	-0.20643	0.16696	0.363	0.993966	4922	2	-0.20643
FBgn0040799	4	0.008715	0.028754	0.954966	501	3	-0.45432	0.9252	0.92484	0.999406	14436	0	-0.45432
FBgn0266101	8	0.0087221	0.037567	0.991081	502	3	-0.22625	0.59737	0.75343	0.996319	10913	2	-0.22625
FBgn0053136	6	0.0087747	0.034207	0.991081	503	1	-0.022116	0.86677	0.86882	0.998831	13595	1	-0.022116
FBgn0037121	6	0.0087879	0.034259	0.991081	504	4	-0.6965	0.63298	0.74411	0.99601	11207	1	-0.6965
FBgn0037408	6	0.0087883	0.03426	0.991081	505	5	-0.45048	0.82053	0.83433	0.998831	12985	1	-0.45048
FBgn0023512	4	0.0088241	0.029024	0.954966	506	2	-0.52402	0.90059	0.90019	0.999406	14071	0	-0.52402
FBgn0029856	6	0.0088455	0.03446	0.991081	507	1	-0.18164	0.24044	0.42766	0.993966	6319	1	-0.18164
FBgn0264887	1	0.0089496	0.0088933	0.92849	508	1	-2.8977	0.99105	0.99111	0.999406	15484	0	-2.8977
FBgn0022160	8	0.00895	0.03841	0.991081	509	4	-0.21637	0.91667	0.92264	0.999406	14302	1	-0.21637
FBgn0030961	6	0.0090224	0.03508	0.991081	510	3	-0.15955	0.74913	0.79338	0.997841	12253	1	-0.15955
FBgn0264001	10	0.0090551	0.042467	0.991081	511	4	0.0003186	0.69568	0.84351	0.998831	11748	2	0.0003186
FBgn0039504	6	0.0090625	0.03521	0.991081	512	4	-0.40963	0.41695	0.58056	0.993966	8779	1	-0.40963
FBgn0264562	6	0.0091286	0.035452	0.991081	513	2	-0.19435	0.92104	0.92077	0.999406	14358	0	-0.19435
FBgn0026620	11	0.0091837	0.043404	0.991081	514	5	-0.22671	0.85594	0.92654	0.999406	13429	2	-0.22671
FBgn0051849	6	0.0092002	0.035692	0.991081	515	3	-0.18779	0.54152	0.68263	0.993966	10245	2	-0.18779
FBgn0020399	6	0.0092394	0.035846	0.991081	516	3	-0.18507	0.40284	0.56946	0.993966	8614	2	-0.18507
FBgn0262904	4	0.0092971	0.030123	0.966298	517	3	-0.3175	0.98934	0.98936	0.999406	15456	0	-0.3175
FBgn0267454	4	0.0093091	0.030156	0.966298	518	3	-0.38429	0.98115	0.98114	0.999406	15329	0	-0.38429
FBgn0033547	3	0.0094271	0.025504	0.954966	519	3	-0.68016	0.99057	0.99069	0.999406	15469	0	-0.68016
FBgn0263326	6	0.0094597	0.036589	0.991081	520	3	-0.32992	0.21474	0.39347	0.993966	5858	3	-0.32992
FBgn0038180	6	0.0094824	0.036673	0.991081	521	2	0.03622	0.11295	0.25209	0.989381	3774	2	0.03622
FBgn0031894	6	0.0094983	0.036716	0.991081	522	3	-0.37133	0.95829	0.95829	0.999406	14961	0	-0.37133
FBgn0029895	6	0.0095531	0.03692	0.991081	523	2	-0.019256	0.43631	0.59618	0.993966	8996	2	-0.019256
FBgn0264571	3	0.0095783	0.025869	0.954966	524	3	-0.38987	0.99042	0.99055	0.999406	15467	0	-0.38987
FBgn0263392	7	0.0095893	0.037803	0.991081	525	5	-0.38981	0.9308	0.93076	0.999406	14516	0	-0.38981
FBgn0037222	6	0.009624	0.03717	0.991081	526	2	-0.089951	0.73671	0.78728	0.997535	12131	1	-0.089951
FBgn0052686	6	0.0096788	0.037373	0.991081	527	3	-0.30889	0.70207	0.77147	0.996486	11822	1	-0.30889
FBgn0051184	6	0.0097603	0.037663	0.991081	528	3	-0.58929	0.33722	0.51816	0.993966	7766	1	-0.58929
FBgn0031285	6	0.0097653	0.037679	0.991081	529	2	0.12425	0.57439	0.71084	0.99601	10642	2	0.12425
FBgn0085259	6	0.0097816	0.037746	0.991081	530	3	-0.38166	0.93204	0.93186	0.999406	14533	0	-0.38166
FBgn0015513	6	0.0097873	0.037767	0.991081	531	4	-0.58086	0.80822	0.82639	0.998831	12838	1	-0.58086
FBgn0044323	6	0.009801	0.0378	0.991081	532	3	-0.34767	0.043524	0.1238	0.986319	1792	2	-0.34767
FBgn0038463	6	0.0098282	0.037896	0.991081	533	3	-0.20073	0.6952	0.76857	0.996486	11743	1	-0.20073
FBgn0035218	6	0.0098282	0.037896	0.991081	534	3	-0.018149	0.037215	0.10893	0.986319	1562	3	-0.018149
FBgn0033869	6	0.0099021	0.03815	0.991081	535	3	-0.41699	0.34384	0.52328	0.993966	7867	1	-0.41699
FBgn0027793	6	0.0099068	0.038167	0.991081	536	2	-0.0016819	0.82022	0.83413	0.998831	12980	1	-0.0016819
FBgn0037504	6	0.0099275	0.038243	0.991081	537	3	-0.33624	0.35454	0.53152	0.993966	8038	2	-0.33624
FBgn0028940	3	0.0099504	0.026824	0.954966	538	1	0.0023634	0.31684	0.39772	0.993966	7483	1	0.0023634
FBgn0052987	6	0.0099775	0.038417	0.991081	539	3	-0.28817	0.51505	0.66028	0.993966	9934	1	-0.28817
FBgn0038487	6	0.0099931	0.038477	0.991081	540	2	0.063779	0.082646	0.20738	0.986319	3088	1	0.063779
FBgn0031010	6	0.010051	0.038691	0.991081	541	4	-0.34085	0.9821	0.98213	0.999406	15339	0	-0.34085
FBgn0266686	4	0.010064	0.031868	0.977709	542	1	0.50812	0.035459	0.088101	0.986319	1508	2	0.50812
FBgn0051414	6	0.010066	0.038739	0.991081	543	2	-0.23562	0.36039	0.53609	0.993966	8116	2	-0.23562
FBgn0038388	6	0.010105	0.038876	0.991081	544	3	-0.29049	0.22589	0.4083	0.993966	6073	1	-0.29049
FBgn0267603	4	0.010111	0.031966	0.977709	545	1	-0.12342	0.12345	0.2341	0.98878	4011	1	-0.12342
FBgn0035168	6	0.010119	0.03893	0.991081	546	2	-0.073105	0.41672	0.58037	0.993966	8778	1	-0.073105
FBgn0036761	1	0.010144	0.010083	0.92849	547	1	-0.84216	0.98986	0.98992	0.999406	15462	0	-0.84216
FBgn0267925	4	0.010148	0.03206	0.977709	548	2	-0.34794	0.22952	0.35428	0.992402	6140	2	-0.34794
FBgn0025790	6	0.010152	0.039038	0.991081	549	4	-0.96733	0.91671	0.91635	0.999406	14304	0	-0.96733
FBgn0001215	3	0.010181	0.027418	0.954966	550	1	0.2149	0.20655	0.31806	0.989381	5683	1	0.2149
FBgn0261932	4	0.010187	0.032147	0.977709	551	3	-0.42716	0.85943	0.85909	0.998831	13491	0	-0.42716
FBgn0025620	6	0.01019	0.039185	0.991081	552	3	-0.23151	0.59755	0.73117	0.99601	10916	2	-0.23151
FBgn0004880	6	0.010243	0.039347	0.991081	553	2	0.057336	0.064835	0.17221	0.986319	2535	2	0.057336
FBgn0024889	6	0.010256	0.039391	0.991081	554	2	0.4387	0.034091	0.10149	0.986319	1463	3	0.4387
FBgn0034753	6	0.010323	0.039639	0.991081	555	4	-0.69819	0.18137	0.34833	0.992402	5199	2	-0.69819
FBgn0037571	6	0.010323	0.039639	0.991081	556	4	-0.81558	0.45135	0.60815	0.993966	9157	1	-0.81558
FBgn0037110	6	0.010323	0.039639	0.991081	557	4	-0.73178	0.96373	0.96379	0.999406	15054	0	-0.73178
FBgn0030141	6	0.010363	0.039801	0.991081	558	4	-0.32316	0.85848	0.86192	0.998831	13471	1	-0.32316
FBgn0033460	6	0.010395	0.039905	0.991081	559	3	-0.48695	0.57562	0.7119	0.99601	10656	1	-0.48695
FBgn0000233	6	0.010415	0.039979	0.991081	560	4	-0.60249	0.029197	0.089681	0.986319	1301	1	-0.60249
FBgn0026197	4	0.010447	0.032722	0.977709	561	3	-0.71284	0.055043	0.12812	0.986319	2209	1	-0.71284
FBgn0042641	2	0.010463	0.019653	0.937309	562	2	-1.1192	0.98954	0.9894	0.999406	15460	0	-1.1192
FBgn0265204	4	0.010489	0.032826	0.978942	563	3	-0.94949	0.63356	0.65625	0.993966	11213	1	-0.94949
FBgn0036138	6	0.010543	0.040432	0.991081	564	3	-0.21719	0.95308	0.953	0.999406	14879	0	-0.21719
FBgn0039296	6	0.010553	0.040463	0.991081	565	3	-0.20832	0.76419	0.80112	0.998831	12396	1	-0.20832
FBgn0032601	6	0.010574	0.040547	0.991081	566	3	-0.32265	0.091306	0.22028	0.986319	3314	2	-0.32265
FBgn0030801	6	0.010614	0.040681	0.991081	567	2	-0.07646	0.59214	0.72634	0.99601	10842	1	-0.07646
FBgn0028514	6	0.010684	0.040961	0.991081	568	2	-0.25644	0.73178	0.7849	0.996737	12090	1	-0.25644
FBgn0027579	7	0.01073	0.041583	0.991081	569	5	-0.29682	0.47688	0.65244	0.993966	9480	1	-0.29682
FBgn0267079	4	0.010776	0.033451	0.986428	570	3	-0.36008	0.98916	0.98918	0.999406	15451	0	-0.36008
FBgn0259978	7	0.010807	0.041848	0.991081	571	4	-0.18425	0.18558	0.37231	0.993966	5299	2	-0.18425
FBgn0037167	6	0.010826	0.041472	0.991081	572	3	-0.24656	0.24519	0.43399	0.993966	6413	2	-0.24656
FBgn0053517	6	0.010848	0.041531	0.991081	573	3	-0.43872	0.55598	0.69501	0.993966	10437	1	-0.43872
FBgn0040528	6	0.010855	0.041552	0.991081	574	4	-0.47068	0.71904	0.779	0.996486	11979	1	-0.47068
FBgn0260932	6	0.010896	0.041655	0.991081	575	2	0.035248	0.010755	0.041231	0.986319	581	3	0.035248
FBgn0028497	6	0.010947	0.041796	0.991081	576	3	-0.159	0.067949	0.17907	0.986319	2636	2	-0.159
FBgn0261501	4	0.01096	0.033858	0.991081	577	1	-0.2112	0.67521	0.68669	0.993966	11560	1	-0.2112
FBgn0034057	6	0.010967	0.041857	0.991081	578	1	0.27099	0.16173	0.3211	0.989381	4816	3	0.27099
FBgn0261860	6	0.011028	0.042038	0.991081	579	3	-0.32774	0.060358	0.16223	0.986319	2400	1	-0.32774
FBgn0034420	6	0.011028	0.042038	0.991081	580	3	-0.49299	0.90903	0.90868	0.999406	14179	0	-0.49299
FBgn0264720	4	0.011031	0.034027	0.991081	581	1	0.24994	0.006885	0.023432	0.986319	389	2	0.24994
FBgn0036187	4	0.011055	0.034085	0.991081	582	2	-0.46883	0.62429	0.64985	0.993966	11125	1	-0.46883
FBgn0030030	6	0.011089	0.042208	0.991081	583	3	-0.29739	0.44111	0.59996	0.993966	9053	1	-0.29739
FBgn0024371	6	0.011089	0.042208	0.991081	584	3	-0.70904	0.30249	0.49167	0.993966	7302	2	-0.70904
FBgn0011743	4	0.011102	0.034193	0.991081	585	1	-0.25616	0.51039	0.5792	0.993966	9867	1	-0.25616
FBgn0030889	6	0.011118	0.042293	0.991081	586	3	-0.36083	0.61068	0.73607	0.99601	11022	1	-0.36083
FBgn0016978	2	0.011153	0.020961	0.950739	587	2	-0.9121	0.95294	0.95278	0.999406	14876	0	-0.9121
FBgn0032679	6	0.01125	0.042658	0.991081	588	1	-0.067498	0.2292	0.41277	0.993966	6132	1	-0.067498
FBgn0265186	5	0.011263	0.03745	0.991081	589	4	-0.88957	0.99612	0.99612	0.999537	15567	0	-0.88957
FBgn0004895	6	0.011301	0.042787	0.991081	590	4	-0.41735	0.97331	0.97338	0.999406	15211	0	-0.41735
FBgn0000568	16	0.011357	0.05926	0.991081	591	6	-0.23536	0.1139	0.33988	0.992402	3797	5	-0.23536
FBgn0044811	6	0.01136	0.042954	0.991081	592	3	-0.17305	0.48478	0.63532	0.993966	9570	1	-0.17305
FBgn0005671	4	0.011374	0.034811	0.991081	593	3	-0.28514	0.64518	0.66454	0.993966	11311	1	-0.28514
FBgn0028430	6	0.011386	0.043024	0.991081	594	4	-0.53104	0.45512	0.61124	0.993966	9211	1	-0.53104
FBgn0030418	8	0.011407	0.047679	0.991081	595	3	-0.47279	0.2581	0.47698	0.993966	6641	1	-0.47279
FBgn0038739	4	0.011427	0.034919	0.991081	596	3	-0.35949	0.86649	0.86606	0.998831	13586	0	-0.35949
FBgn0038804	6	0.011447	0.043194	0.991081	597	4	-0.85021	0.73694	0.78739	0.997535	12132	1	-0.85021
FBgn0033236	6	0.011447	0.043194	0.991081	598	4	-0.83522	0.32274	0.50703	0.993966	7560	1	-0.83522
FBgn0032049	6	0.011462	0.043229	0.991081	599	2	0.081621	0.34442	0.52372	0.993966	7871	2	0.081621
FBgn0036169	2	0.011502	0.021637	0.953581	600	2	-1.2996	0.9885	0.98836	0.999406	15444	0	-1.2996
FBgn0033308	6	0.011547	0.043439	0.991081	601	3	-0.33061	0.057001	0.15466	0.986319	2270	2	-0.33061
FBgn0032088	6	0.011547	0.043439	0.991081	602	3	-0.2416	0.54487	0.68555	0.993966	10293	2	-0.2416
FBgn0038173	6	0.011547	0.043439	0.991081	603	2	-0.02596	0.19141	0.36204	0.993966	5407	2	-0.02596
FBgn0051882	6	0.011576	0.043519	0.991081	604	4	-0.43211	0.29157	0.48351	0.993966	7169	1	-0.43211
FBgn0035922	4	0.011583	0.035259	0.991081	605	3	-0.51769	0.9513	0.95113	0.999406	14858	0	-0.51769
FBgn0002940	6	0.011603	0.043597	0.991081	606	2	-0.092527	0.72897	0.78356	0.996699	12069	1	-0.092527
FBgn0003744	4	0.011695	0.035498	0.991081	607	3	-0.55837	0.16826	0.28508	0.989381	4943	1	-0.55837
FBgn0036575	6	0.011744	0.043999	0.991081	608	3	-0.29611	0.97263	0.97272	0.999406	15203	0	-0.29611
FBgn0052391	6	0.011774	0.044077	0.991081	609	4	-1.0576	0.5592	0.69772	0.993966	10481	1	-1.0576
FBgn0034198	6	0.011829	0.044213	0.991081	610	3	-0.40739	0.61256	0.73674	0.99601	11034	1	-0.40739
FBgn0032702	4	0.011839	0.035808	0.991081	611	3	-1.137	0.6534	0.67037	0.993966	11375	1	-1.137
FBgn0024365	6	0.011841	0.044253	0.991081	612	3	-0.21747	0.83797	0.84649	0.998831	13189	1	-0.21747
FBgn0261648	5	0.011858	0.039172	0.991081	613	2	-0.20138	0.10989	0.23225	0.98878	3716	2	-0.20138
FBgn0086443	4	0.011896	0.035938	0.991081	614	2	-0.37388	0.34254	0.48119	0.993966	7850	2	-0.37388
FBgn0037667	6	0.011974	0.04461	0.991081	615	4	-0.41369	0.47932	0.63081	0.993966	9511	1	-0.41369
FBgn0266750	4	0.011997	0.036177	0.991081	616	1	-0.054373	0.44221	0.54275	0.993966	9063	1	-0.054373
FBgn0085446	8	0.012006	0.049571	0.991081	617	3	-0.46804	0.9732	0.97336	0.999406	15210	0	-0.46804
FBgn0027085	6	0.012018	0.044718	0.991081	618	4	-0.29735	0.84967	0.85503	0.998831	13352	1	-0.29735
FBgn0033731	6	0.012027	0.044739	0.991081	619	2	0.16568	0.86312	0.86577	0.998831	13548	1	0.16568
FBgn0053543	2	0.012053	0.022669	0.954966	620	2	-0.48345	0.98795	0.98778	0.999406	15432	0	-0.48345
FBgn0052450	6	0.012057	0.044831	0.991081	621	4	-0.46851	0.6364	0.74535	0.99601	11251	1	-0.46851
FBgn0033979	6	0.012097	0.044937	0.991081	622	3	-0.10668	0.5984	0.73183	0.99601	10930	1	-0.10668
FBgn0086904	7	0.0121	0.046048	0.991081	623	3	0.030078	0.21673	0.40884	0.993966	5881	3	0.030078
FBgn0034300	4	0.012138	0.036496	0.991081	624	3	-0.51794	0.74496	0.74546	0.99601	12212	1	-0.51794
FBgn0265719	4	0.012139	0.036497	0.991081	625	3	-1.3856	0.9431	0.94288	0.999406	14698	0	-1.3856
FBgn0032122	6	0.012147	0.045061	0.991081	626	3	-0.27667	0.58873	0.72331	0.99601	10808	1	-0.27667
FBgn0264950	4	0.012186	0.03659	0.991081	627	2	-0.26255	0.49238	0.56928	0.993966	9652	1	-0.26255
FBgn0267611	4	0.01222	0.036677	0.991081	628	2	-0.3842	0.74619	0.74661	0.99601	12224	1	-0.3842
FBgn0267634	4	0.012233	0.036718	0.991081	629	2	-0.4302	0.97046	0.97024	0.999406	15168	0	-0.4302
FBgn0022027	6	0.012238	0.045336	0.991081	630	2	-0.0078715	0.45188	0.60858	0.993966	9163	2	-0.0078715
FBgn0032082	6	0.012238	0.04534	0.991081	631	2	-0.55299	0.06475	0.17203	0.986319	2534	1	-0.55299
FBgn0036837	12	0.012261	0.057691	0.991081	632	6	-0.26394	0.92233	0.96313	0.999406	14375	2	-0.26394
FBgn0031571	6	0.012271	0.045429	0.991081	633	3	-0.47637	0.43283	0.59339	0.993966	8946	2	-0.47637
FBgn0085325	6	0.012309	0.045529	0.991081	634	2	0.013463	0.27523	0.47122	0.993966	6946	2	0.013463
FBgn0050125	6	0.012322	0.045576	0.991081	635	2	0.06163	0.17056	0.33331	0.989381	4994	2	0.06163
FBgn0025573	6	0.012351	0.04564	0.991081	636	3	-0.097938	0.1081	0.24495	0.989381	3672	2	-0.097938
FBgn0034909	6	0.012379	0.045711	0.991081	637	2	0.0064214	0.42381	0.58607	0.993966	8855	2	0.0064214
FBgn0040534	6	0.012436	0.04586	0.991081	638	3	-0.27185	0.29703	0.48761	0.993966	7239	1	-0.27185
FBgn0037301	6	0.012455	0.045913	0.991081	639	4	-0.36089	0.84441	0.85112	0.998831	13273	1	-0.36089
FBgn0031139	6	0.012491	0.046021	0.991081	640	4	-0.34864	0.33858	0.51927	0.993966	7791	2	-0.34864
FBgn0036660	3	0.012516	0.033241	0.986428	641	1	-0.21651	0.38421	0.44089	0.993966	8382	1	-0.21651
FBgn0010109	6	0.012521	0.046098	0.991081	642	1	-0.048064	0.72989	0.78399	0.996699	12075	1	-0.048064
FBgn0036817	6	0.012568	0.046237	0.991081	643	3	-0.42533	0.50846	0.65484	0.993966	9845	1	-0.42533
FBgn0261538	6	0.012591	0.04629	0.991081	644	1	0.34054	0.029375	0.090132	0.986319	1308	4	0.34054
FBgn0030148	5	0.012641	0.04146	0.991081	645	2	0.046508	0.76665	0.77835	0.996486	12420	1	0.046508
FBgn0029727	6	0.012662	0.046474	0.991081	646	3	-0.11037	0.042066	0.12037	0.986319	1742	2	-0.11037
FBgn0031725	6	0.012691	0.046545	0.991081	647	4	-0.58498	0.77785	0.80845	0.998831	12529	1	-0.58498
FBgn0266619	4	0.012704	0.037771	0.991081	648	1	0.050813	0.27313	0.40323	0.993966	6921	1	0.050813
FBgn0030280	6	0.012719	0.046625	0.991081	649	4	-0.36134	0.90488	0.9046	0.999406	14124	0	-0.36134
FBgn0040467	6	0.012745	0.046687	0.991081	650	4	-0.80477	0.47325	0.62587	0.993966	9439	1	-0.80477
FBgn0038258	6	0.012745	0.046687	0.991081	651	4	-0.48004	0.24044	0.42766	0.993966	6321	1	-0.48004
FBgn0267366	6	0.012803	0.046839	0.991081	652	3	-0.39944	0.084337	0.2099	0.986319	3129	1	-0.39944
FBgn0039091	6	0.012821	0.046892	0.991081	653	4	-0.52368	0.97034	0.97047	0.999406	15166	0	-0.52368
FBgn0034838	6	0.012821	0.046892	0.991081	654	4	-0.64483	0.98802	0.98805	0.999406	15433	0	-0.64483
FBgn0002441	4	0.012845	0.038096	0.991081	655	1	-0.01969	0.92683	0.92647	0.999406	14463	0	-0.01969
FBgn0036330	6	0.012867	0.047016	0.991081	656	3	-0.60633	0.45057	0.60753	0.993966	9149	2	-0.60633
FBgn0020887	6	0.012867	0.047016	0.991081	657	3	-0.66336	0.92824	0.92805	0.999406	14480	0	-0.66336
FBgn0267303	4	0.012892	0.038197	0.991081	658	3	-0.4444	0.77074	0.77014	0.996486	12448	1	-0.4444
FBgn0265632	6	0.012996	0.047361	0.991081	659	3	-0.39806	0.12899	0.27521	0.989381	4128	2	-0.39806
FBgn0036537	6	0.012996	0.047361	0.991081	660	4	-0.41505	0.18723	0.3563	0.993728	5332	2	-0.41505
FBgn0263233	4	0.01301	0.038492	0.991081	661	2	-0.77906	0.29302	0.42556	0.993966	7188	1	-0.77906
FBgn0038641	6	0.013035	0.047462	0.991081	662	3	-0.27567	0.33787	0.51872	0.993966	7778	1	-0.27567
FBgn0265075	4	0.013045	0.038568	0.991081	663	2	-0.18886	0.35326	0.49314	0.993966	8020	2	-0.18886
FBgn0036757	6	0.01305	0.047498	0.991081	664	2	0.1099	0.43012	0.59116	0.993966	8922	2	0.1099
FBgn0267983	4	0.013073	0.038636	0.991081	665	3	-0.52411	0.98713	0.98715	0.999406	15418	0	-0.52411
FBgn0039190	4	0.013127	0.038757	0.991081	666	1	-0.036972	0.31336	0.44843	0.993966	7445	1	-0.036972
FBgn0000482	6	0.013176	0.04785	0.991081	667	3	-0.49637	0.73847	0.78811	0.99772	12153	1	-0.49637
FBgn0265042	14	0.013183	0.063892	0.991081	668	8	-0.36334	0.76119	0.90655	0.999406	12369	2	-0.36334
FBgn0032151	6	0.013204	0.047912	0.991081	669	4	-0.43478	0.073689	0.19152	0.986319	2839	2	-0.43478
FBgn0032981	6	0.013226	0.047966	0.991081	670	2	-0.15317	0.3607	0.53633	0.993966	8120	2	-0.15317
FBgn0030103	6	0.013297	0.048158	0.991081	671	2	0.094105	0.33438	0.51596	0.993966	7721	2	0.094105
FBgn0040554	4	0.013346	0.039247	0.991081	672	3	-0.72364	0.99187	0.99193	0.999406	15506	0	-0.72364
FBgn0037713	6	0.013359	0.048324	0.991081	673	4	-0.45241	0.92852	0.92834	0.999406	14489	0	-0.45241
FBgn0243514	6	0.013359	0.048324	0.991081	674	2	-0.20664	0.57695	0.71307	0.99601	10665	2	-0.20664
FBgn0040950	6	0.013393	0.048424	0.991081	675	4	-0.4547	0.94269	0.94257	0.999406	14693	0	-0.4547
FBgn0054027	6	0.013416	0.048492	0.991081	676	4	-0.3603	0.9358	0.9357	0.999406	14589	0	-0.3603
FBgn0034096	6	0.013508	0.048722	0.991081	677	2	-0.05624	0.95045	0.95032	0.999406	14841	0	-0.05624
FBgn0015520	6	0.013531	0.04878	0.991081	678	2	0.109	0.0096946	0.037449	0.986319	529	3	0.109
FBgn0052772	6	0.013555	0.048854	0.991081	679	3	-0.72085	0.79421	0.81779	0.998831	12680	1	-0.72085
FBgn0051272	6	0.013579	0.048919	0.991081	680	1	-0.030926	0.74066	0.78919	0.997775	12172	1	-0.030926
FBgn0036909	6	0.01362	0.049035	0.991081	681	4	-0.41517	0.92655	0.92637	0.999406	14458	0	-0.41517
FBgn0045479	6	0.01362	0.049035	0.991081	682	4	-0.2924	0.067848	0.17885	0.986319	2631	2	-0.2924
FBgn0037455	6	0.01372	0.049301	0.991081	683	3	-0.18792	0.51855	0.6632	0.993966	9974	2	-0.18792
FBgn0051105	6	0.013723	0.049307	0.991081	684	2	-0.14049	0.3529	0.53025	0.993966	8012	2	-0.14049
FBgn0033273	6	0.013782	0.049463	0.991081	685	3	-0.39509	0.27482	0.47089	0.993966	6941	2	-0.39509
FBgn0263032	2	0.013794	0.025835	0.954966	686	2	-1.5869	0.98621	0.98609	0.999406	15407	0	-1.5869
FBgn0039321	6	0.013825	0.049576	0.991081	687	3	-0.096529	0.025855	0.081407	0.986319	1176	2	-0.096529
FBgn0035086	6	0.013825	0.049576	0.991081	688	3	-0.37157	0.54713	0.68747	0.993966	10320	2	-0.37157
FBgn0266455	6	0.013915	0.04979	0.991081	689	4	-0.46593	0.95514	0.95508	0.999406	14916	0	-0.46593
FBgn0024236	7	0.013957	0.051991	0.991081	690	5	-0.59443	0.23281	0.42774	0.993966	6190	1	-0.59443
FBgn0263231	6	0.014002	0.050032	0.991081	691	3	-0.33063	0.11504	0.2552	0.989381	3822	1	-0.33063
FBgn0261437	6	0.014035	0.050132	0.991081	692	4	-0.58896	0.67717	0.76114	0.996486	11583	1	-0.58896
FBgn0037989	6	0.014035	0.050132	0.991081	693	4	-0.44991	0.96546	0.96554	0.999406	15083	0	-0.44991
FBgn0260767	5	0.014093	0.045754	0.991081	694	3	-0.43758	0.88839	0.88871	0.999406	13887	0	-0.43758
FBgn0265305	4	0.014102	0.04097	0.991081	695	3	-0.68218	0.80441	0.8039	0.998831	12798	0	-0.68218
FBgn0051901	6	0.014143	0.050393	0.991081	696	1	0.079413	0.051687	0.14257	0.986319	2085	2	0.079413
FBgn0023171	4	0.014163	0.041121	0.991081	697	1	-0.17057	0.36037	0.501	0.993966	8115	2	-0.17057
FBgn0035557	6	0.014169	0.050463	0.991081	698	4	-0.49449	0.51501	0.66024	0.993966	9933	1	-0.49449
FBgn0050076	6	0.01419	0.050518	0.991081	699	4	-0.33438	0.53681	0.67854	0.993966	10197	2	-0.33438
FBgn0266955	4	0.01421	0.041229	0.991081	700	3	-1.0256	0.17857	0.29676	0.989381	5148	1	-1.0256
FBgn0260986	6	0.014217	0.050587	0.991081	701	3	-0.59351	0.074353	0.19295	0.986319	2859	2	-0.59351
FBgn0035006	6	0.014287	0.050785	0.991081	702	2	-0.0055101	0.24975	0.43999	0.993966	6502	2	-0.0055101
FBgn0262892	4	0.014304	0.041449	0.991081	703	3	-0.49934	0.82492	0.82439	0.998831	13035	0	-0.49934
FBgn0266826	4	0.014304	0.041449	0.991081	704	3	-0.69402	0.4439	0.5436	0.993966	9082	1	-0.69402
FBgn0038741	6	0.014354	0.050953	0.991081	705	3	-0.26366	0.91235	0.91208	0.999406	14242	0	-0.26366
FBgn0261938	6	0.014383	0.051028	0.991081	706	2	-0.15438	0.44864	0.60596	0.993966	9127	2	-0.15438
FBgn0031110	6	0.014383	0.051028	0.991081	707	3	-0.0824	0.76739	0.8028	0.998831	12426	1	-0.0824
FBgn0002926	3	0.014441	0.037985	0.991081	708	3	-0.34087	0.98556	0.98567	0.999406	15389	0	-0.34087
FBgn0029890	6	0.0145	0.051341	0.991081	709	3	-0.32404	0.94692	0.94673	0.999406	14776	0	-0.32404
FBgn0050469	6	0.014514	0.051372	0.991081	710	3	-0.3738	0.25472	0.44645	0.993966	6587	2	-0.3738
FBgn0002023	15	0.014518	0.072028	0.993157	711	8	-0.24606	0.51654	0.78958	0.997775	9946	4	-0.24606
FBgn0266566	7	0.01453	0.053783	0.991081	712	5	-0.40673	0.87097	0.88232	0.998991	13657	1	-0.40673
FBgn0267616	4	0.014531	0.041992	0.991081	713	3	-0.50242	0.85145	0.85093	0.998831	13372	0	-0.50242
FBgn0264816	4	0.014539	0.042009	0.991081	714	3	-0.3285	0.52844	0.58953	0.993966	10102	1	-0.3285
FBgn0010316	6	0.014565	0.051512	0.991081	715	2	-0.4917	0.46659	0.62049	0.993966	9346	2	-0.4917
FBgn0050431	6	0.014567	0.051516	0.991081	716	4	-0.53169	0.99625	0.99625	0.999537	15569	0	-0.53169
FBgn0036423	6	0.014567	0.051516	0.991081	717	4	-0.56083	0.46343	0.61796	0.993966	9310	1	-0.56083
FBgn0261444	6	0.014628	0.051681	0.991081	718	4	-0.53586	0.93377	0.93361	0.999406	14561	0	-0.53586
FBgn0265101	6	0.014636	0.051704	0.991081	719	3	-0.89157	0.78864	0.81452	0.998831	12636	1	-0.89157
FBgn0037383	4	0.014656	0.042264	0.991081	720	2	-0.02694	0.71309	0.71721	0.99601	11924	1	-0.02694
FBgn0263441	4	0.014656	0.042264	0.991081	721	1	-0.2269	0.68396	0.69356	0.993966	11639	1	-0.2269
FBgn0283468	6	0.014719	0.051921	0.991081	722	4	-0.60572	0.45977	0.615	0.993966	9270	1	-0.60572
FBgn0033027	6	0.014719	0.051921	0.991081	723	4	-0.46934	0.28733	0.48032	0.993966	7106	1	-0.46934
FBgn0015791	4	0.01475	0.042475	0.991081	724	3	-0.46504	0.13983	0.25284	0.989381	4360	1	-0.46504
FBgn0030512	6	0.014757	0.052026	0.991081	725	3	-0.49215	0.42583	0.5877	0.993966	8884	1	-0.49215
FBgn0053995	2	0.014766	0.027595	0.954966	726	1	-0.11315	0.069226	0.12101	0.986319	2685	1	-0.11315
FBgn0026190	6	0.014777	0.052076	0.991081	727	1	0.23028	0.0086713	0.03388	0.986319	481	3	0.23028
FBgn0035237	6	0.014795	0.052129	0.991081	728	2	-0.35098	0.95013	0.95001	0.999406	14838	0	-0.35098
FBgn0003386	3	0.014826	0.038954	0.991081	729	3	-0.60298	0.98517	0.98532	0.999406	15383	0	-0.60298
FBgn0030900	6	0.014847	0.052287	0.991081	730	1	-0.057619	0.094024	0.22427	0.98878	3373	2	-0.057619
FBgn0030054	6	0.014853	0.052305	0.991081	731	4	-0.41084	0.63599	0.74522	0.99601	11242	1	-0.41084
FBgn0032886	5	0.014857	0.047912	0.991081	732	1	0.048482	0.23006	0.38682	0.993966	6148	1	0.048482
FBgn0030362	8	0.014857	0.058034	0.991081	733	5	-0.78834	0.30088	0.51917	0.993966	7280	2	-0.78834
FBgn0039209	8	0.014879	0.058104	0.991081	734	3	0.13023	0.0029498	0.01454	0.986319	183	4	0.13023
FBgn0038499	6	0.014887	0.052394	0.991081	735	3	-0.45372	0.98759	0.9876	0.999406	15425	0	-0.45372
FBgn0039494	6	0.014887	0.052394	0.991081	736	3	-0.35148	0.36954	0.54313	0.993966	8235	2	-0.35148
FBgn0033033	6	0.014893	0.052408	0.991081	737	2	-0.15851	0.15699	0.31444	0.989381	4710	1	-0.15851
FBgn0265821	4	0.014903	0.042842	0.991081	738	3	-0.47385	0.87579	0.87533	0.998831	13712	0	-0.47385
FBgn0034968	2	0.014906	0.027847	0.954966	739	2	-1.1073	0.98509	0.98497	0.999406	15380	0	-1.1073
FBgn0267217	4	0.014915	0.042868	0.991081	740	1	-0.01042	0.17918	0.29747	0.989381	5160	2	-0.01042
FBgn0037368	6	0.014942	0.052527	0.991081	741	4	-0.54682	0.998	0.99794	0.999537	15596	0	-0.54682
FBgn0022709	6	0.014942	0.052527	0.991081	742	4	-0.53607	0.96894	0.96905	0.999406	15142	0	-0.53607
FBgn0032946	6	0.014942	0.052527	0.991081	743	4	-0.48199	0.9882	0.98821	0.999406	15437	0	-0.48199
FBgn0033500	6	0.014985	0.052628	0.991081	744	3	-0.57447	0.98781	0.98782	0.999406	15430	0	-0.57447
FBgn0036008	4	0.015023	0.043116	0.991081	745	3	-0.57218	0.8404	0.83983	0.998831	13224	0	-0.57218
FBgn0037464	6	0.015036	0.052743	0.991081	746	4	-0.55028	0.86312	0.86577	0.998831	13545	1	-0.55028
FBgn0036995	8	0.015065	0.058658	0.991081	747	2	-0.10882	0.80678	0.87377	0.998831	12821	1	-0.10882
FBgn0027786	6	0.015118	0.052954	0.991081	748	3	-0.28287	0.46825	0.62181	0.993966	9373	1	-0.28287
FBgn0036544	6	0.015141	0.053012	0.991081	749	3	-0.23702	0.55844	0.6971	0.993966	10467	2	-0.23702
FBgn0052590	4	0.01515	0.043396	0.991081	750	2	-1.0812	0.8509	0.85039	0.998831	13363	0	-1.0812
FBgn0041707	6	0.015199	0.053155	0.991081	751	3	-0.3318	0.94363	0.94345	0.999406	14709	0	-0.3318
FBgn0030186	6	0.01527	0.053333	0.991081	752	2	-0.065816	0.41252	0.57709	0.993966	8721	2	-0.065816
FBgn0052085	6	0.01534	0.053494	0.991081	753	4	-0.55099	0.75717	0.79743	0.998038	12330	1	-0.55099
FBgn0051176	6	0.015369	0.05358	0.991081	754	2	-0.081121	0.15429	0.31072	0.989381	4650	1	-0.081121
FBgn0031053	6	0.01541	0.053681	0.991081	755	2	-0.32853	0.99133	0.99134	0.999406	15491	0	-0.32853
FBgn0033787	4	0.01543	0.044017	0.991081	756	3	-0.44738	0.96507	0.96487	0.999406	15075	0	-0.44738
FBgn0030877	4	0.01543	0.044017	0.991081	757	3	-0.48197	0.92589	0.92553	0.999406	14446	0	-0.48197
FBgn0038114	6	0.015464	0.053819	0.991081	758	3	-0.21132	0.28432	0.47807	0.993966	7064	2	-0.21132
FBgn0033377	6	0.015481	0.053861	0.991081	759	1	-0.14148	0.30857	0.49629	0.993966	7383	1	-0.14148
FBgn0083971	3	0.015518	0.040661	0.991081	760	2	-0.41456	0.75328	0.75322	0.996319	12303	0	-0.41456
FBgn0029153	2	0.015534	0.029003	0.954966	761	2	-0.48783	0.98447	0.98436	0.999406	15370	0	-0.48783
FBgn0032048	6	0.015551	0.054034	0.991081	762	2	-0.091271	0.53162	0.67417	0.993966	10142	2	-0.091271
FBgn0032706	6	0.01558	0.054091	0.991081	763	3	-0.27152	0.47248	0.62524	0.993966	9428	2	-0.27152
FBgn0038220	10	0.015613	0.065479	0.991081	764	4	-0.11063	0.15514	0.3727	0.993966	4671	3	-0.11063
FBgn0031319	6	0.015628	0.054212	0.991081	765	4	-0.44778	0.3752	0.54767	0.993966	8296	1	-0.44778
FBgn0038903	6	0.015654	0.054284	0.991081	766	3	-0.22826	0.031873	0.096115	0.986319	1388	2	-0.22826
FBgn0016919	6	0.015662	0.054308	0.991081	767	2	-0.095912	0.85987	0.86304	0.998831	13495	1	-0.095912
FBgn0035761	4	0.015713	0.044688	0.991081	768	3	-1.2007	0.85517	0.85473	0.998831	13422	0	-1.2007
FBgn0039757	8	0.01573	0.060561	0.991081	769	5	-0.48571	0.76275	0.86105	0.998831	12386	1	-0.48571
FBgn0004854	6	0.015762	0.054575	0.991081	770	2	-0.61787	0.47452	0.6269	0.993966	9451	2	-0.61787
FBgn0053124	6	0.015809	0.054691	0.991081	771	3	-0.46912	0.43453	0.59477	0.993966	8971	2	-0.46912
FBgn0024689	6	0.015833	0.054739	0.991081	772	4	-0.37046	0.99048	0.9905	0.999406	15468	0	-0.37046
FBgn0036376	5	0.015876	0.050818	0.991081	773	4	-0.46528	0.83389	0.83449	0.998831	13138	1	-0.46528
FBgn0029737	4	0.015889	0.045059	0.991081	774	3	-0.34402	0.85943	0.85909	0.998831	13490	0	-0.34402
FBgn0039705	8	0.015909	0.061119	0.991081	775	4	-0.26243	0.3797	0.59637	0.993966	8341	3	-0.26243
FBgn0051693	6	0.01592	0.054967	0.991081	776	3	-0.5752	0.63915	0.74639	0.99601	11274	1	-0.5752
FBgn0032900	6	0.015939	0.055011	0.991081	777	4	-0.45862	0.94604	0.94586	0.999406	14763	0	-0.45862
FBgn0053110	6	0.015973	0.055107	0.991081	778	2	-0.16046	0.76004	0.79891	0.998607	12361	1	-0.16046
FBgn0038551	6	0.016005	0.055199	0.991081	779	3	-0.5018	0.8928	0.89264	0.999406	13951	0	-0.5018
FBgn0030420	3	0.016012	0.041899	0.991081	780	3	-0.83608	0.97719	0.97738	0.999406	15263	0	-0.83608
FBgn0033608	4	0.016035	0.045413	0.991081	781	2	-0.10747	0.39601	0.51991	0.993966	8525	1	-0.10747
FBgn0028343	4	0.016066	0.045483	0.991081	782	3	-0.38615	0.54375	0.59842	0.993966	10272	1	-0.38615
FBgn0262170	6	0.016112	0.055482	0.991081	783	3	-0.14119	0.92486	0.92468	0.999406	14430	0	-0.14119
FBgn0265011	6	0.016114	0.055489	0.991081	784	4	-0.43756	0.55669	0.6956	0.993966	10444	1	-0.43756
FBgn0003865	6	0.016127	0.055525	0.991081	785	3	-0.22657	0.31252	0.4993	0.993966	7436	2	-0.22657
FBgn0034321	9	0.016128	0.065073	0.991081	786	5	-0.49966	0.13609	0.32829	0.989381	4262	3	-0.49966
FBgn0030659	5	0.016148	0.051604	0.991081	787	2	0.23579	0.27078	0.42475	0.993966	6876	2	0.23579
FBgn0040553	6	0.016171	0.055631	0.991081	788	4	-0.53679	0.66351	0.75569	0.996486	11454	1	-0.53679
FBgn0053177	6	0.016171	0.055631	0.991081	789	4	-0.54036	0.91956	0.91924	0.999406	14340	0	-0.54036
FBgn0050417	6	0.016207	0.055727	0.991081	790	2	0.045762	0.50317	0.65041	0.993966	9777	1	0.045762
FBgn0004573	6	0.016207	0.055727	0.991081	791	2	0.084287	0.55432	0.69357	0.993966	10422	2	0.084287
FBgn0052672	8	0.016224	0.062062	0.991081	792	5	-0.35243	0.99032	0.99031	0.999406	15466	0	-0.35243
FBgn0264960	4	0.016228	0.045852	0.991081	793	2	-0.57457	0.365	0.50516	0.993966	8176	1	-0.57457
FBgn0265784	8	0.016251	0.06215	0.991081	794	3	-0.043464	0.48128	0.68893	0.993966	9532	2	-0.043464
FBgn0036913	6	0.016255	0.055854	0.991081	795	2	0.060783	0.05964	0.16062	0.986319	2376	3	0.060783
FBgn0037783	6	0.016269	0.055899	0.991081	796	4	-0.4036	0.25414	0.44571	0.993966	6578	1	-0.4036
FBgn0038504	6	0.016325	0.056032	0.991081	797	2	-0.13566	0.028153	0.087065	0.986319	1264	1	-0.13566
FBgn0265882	4	0.016483	0.046415	0.991081	798	3	-0.71306	0.76274	0.76236	0.996486	12385	1	-0.71306
FBgn0026370	6	0.016501	0.056497	0.991081	799	2	0.042289	0.48679	0.63697	0.993966	9596	2	0.042289
FBgn0004655	6	0.016507	0.056519	0.991081	800	2	-0.049431	0.5026	0.64992	0.993966	9768	2	-0.049431
FBgn0032845	4	0.016512	0.046485	0.991081	801	2	-0.19207	0.64915	0.6674	0.993966	11340	1	-0.19207
FBgn0019828	6	0.016546	0.056628	0.991081	802	3	-0.099866	0.13314	0.28106	0.989381	4208	3	-0.099866
FBgn0261599	6	0.016604	0.05679	0.991081	803	4	-0.52491	0.98436	0.9844	0.999406	15367	0	-0.52491
FBgn0035528	6	0.016604	0.05679	0.991081	804	4	-0.42971	0.91622	0.91591	0.999406	14293	0	-0.42971
FBgn0036062	4	0.016606	0.046674	0.991081	805	1	0.32385	0.27037	0.40007	0.993966	6867	2	0.32385
FBgn0035280	6	0.016625	0.056853	0.991081	806	2	0.19119	0.25523	0.44715	0.993966	6593	3	0.19119
FBgn0010388	4	0.016647	0.046766	0.991081	807	3	-0.40578	0.4718	0.55821	0.993966	9413	1	-0.40578
FBgn0023000	6	0.016669	0.056971	0.991081	808	3	-0.16648	0.28747	0.48043	0.993966	7111	2	-0.16648
FBgn0023518	4	0.016699	0.046881	0.991081	809	2	-0.41549	0.18002	0.29843	0.989381	5176	1	-0.41549
FBgn0031080	6	0.016732	0.05712	0.991081	810	4	-0.3999	0.94576	0.94559	0.999406	14759	0	-0.3999
FBgn0022984	4	0.016764	0.04703	0.991081	811	3	-0.46467	0.97611	0.97602	0.999406	15253	0	-0.46467
FBgn0033794	3	0.016776	0.043806	0.991081	812	3	-0.86637	0.98322	0.98333	0.999406	15355	0	-0.86637
FBgn0267706	4	0.016794	0.047087	0.991081	813	1	-0.11162	0.83121	0.83071	0.998831	13099	0	-0.11162
FBgn0037129	6	0.016817	0.057338	0.991081	814	3	-0.65325	0.78135	0.81037	0.998831	12567	1	-0.65325
FBgn0038575	6	0.016845	0.057405	0.991081	815	4	-0.4331	0.43584	0.59581	0.993966	8989	1	-0.4331
FBgn0040104	6	0.016912	0.057569	0.991081	816	4	-0.38716	0.54394	0.68476	0.993966	10280	1	-0.38716
FBgn0015778	6	0.01696	0.057684	0.991081	817	4	-0.34317	0.99449	0.99451	0.999537	15544	0	-0.34317
FBgn0039250	6	0.017005	0.057819	0.991081	818	3	-0.23603	0.9821	0.98213	0.999406	15340	0	-0.23603
FBgn0035986	4	0.01702	0.047592	0.991081	819	3	-0.42882	0.9542	0.95398	0.999406	14900	0	-0.42882
FBgn0027492	4	0.01702	0.047592	0.991081	820	3	-0.34652	0.96507	0.96487	0.999406	15074	0	-0.34652
FBgn0020369	6	0.017028	0.057879	0.991081	821	1	-0.079509	0.76195	0.79994	0.998831	12375	1	-0.079509
FBgn0003374	6	0.01706	0.057952	0.991081	822	4	-0.35585	0.23996	0.42704	0.993966	6313	1	-0.35585
FBgn0034345	6	0.01706	0.057952	0.991081	823	4	-0.28574	0.65865	0.75378	0.996319	11416	1	-0.28574
FBgn0030431	6	0.017071	0.057981	0.991081	824	4	-0.54959	0.71456	0.77698	0.996486	11944	1	-0.54959
FBgn0020493	6	0.017071	0.057981	0.991081	825	4	-0.76983	0.95479	0.95475	0.999406	14910	0	-0.76983
FBgn0250874	4	0.017087	0.047749	0.991081	826	3	-0.3855	0.62249	0.64856	0.993966	11111	1	-0.3855
FBgn0086254	7	0.017136	0.062041	0.991081	827	2	-0.011633	0.11172	0.26723	0.989381	3747	1	-0.011633
FBgn0053098	9	0.017159	0.068611	0.991081	828	6	-0.23421	0.99903	0.99903	0.999544	15619	0	-0.23421
FBgn0035768	6	0.017169	0.058216	0.991081	829	2	-0.24982	0.26262	0.45667	0.993966	6726	2	-0.24982
FBgn0028916	6	0.017193	0.058278	0.991081	830	4	-0.50903	0.078391	0.20101	0.986319	2974	1	-0.50903
FBgn0029697	6	0.017193	0.058278	0.991081	831	4	-0.65842	0.89081	0.89068	0.999406	13922	0	-0.65842
FBgn0263768	4	0.017233	0.048071	0.991081	832	2	-0.7524	0.17653	0.29443	0.989381	5106	2	-0.7524
FBgn0039112	6	0.017262	0.058481	0.991081	833	3	-0.078677	0.12301	0.26658	0.989381	4007	3	-0.078677
FBgn0036873	1	0.017263	0.017229	0.937309	834	1	-1.0854	0.98274	0.98289	0.999406	15347	0	-1.0854
FBgn0038509	6	0.017279	0.058519	0.991081	835	2	-0.040606	0.26328	0.45753	0.993966	6738	2	-0.040606
FBgn0031012	6	0.017306	0.058596	0.991081	836	3	-0.14939	0.51469	0.66	0.993966	9927	2	-0.14939
FBgn0086372	6	0.017309	0.058604	0.991081	837	2	0.33493	0.025489	0.080487	0.986319	1155	4	0.33493
FBgn0003048	6	0.01734	0.058683	0.991081	838	4	-0.62415	0.34442	0.52372	0.993966	7873	2	-0.62415
FBgn0039636	6	0.01734	0.058683	0.991081	839	4	-0.50787	0.98715	0.98719	0.999406	15419	0	-0.50787
FBgn0030587	5	0.01735	0.055028	0.991081	840	2	-0.11634	0.94738	0.94756	0.999406	14789	0	-0.11634
FBgn0262972	4	0.017357	0.048349	0.991081	841	1	-0.037756	0.356	0.4961	0.993966	8062	1	-0.037756
FBgn0263587	4	0.017375	0.048383	0.991081	842	3	-0.44098	0.93361	0.9333	0.999406	14557	0	-0.44098
FBgn0035144	6	0.01738	0.058789	0.991081	843	2	-0.019381	0.096561	0.22811	0.98878	3427	1	-0.019381
FBgn0036010	6	0.01745	0.058971	0.991081	844	2	-0.18667	0.22269	0.40406	0.993966	5996	1	-0.18667
FBgn0036795	6	0.017502	0.059097	0.991081	845	4	-0.58484	0.10547	0.24113	0.989381	3622	2	-0.58484
FBgn0050005	6	0.017502	0.059097	0.991081	846	4	-0.40545	0.54738	0.68767	0.993966	10325	1	-0.40545
FBgn0033244	4	0.01751	0.048691	0.991081	847	3	-0.39751	0.98842	0.98844	0.999406	15441	0	-0.39751
FBgn0030678	4	0.017518	0.048713	0.991081	848	3	-0.4058	0.14968	0.26396	0.989381	4550	1	-0.4058
FBgn0036880	6	0.01752	0.059138	0.991081	849	3	-0.24523	0.4043	0.57063	0.993966	8635	1	-0.24523
FBgn0064766	6	0.01754	0.059183	0.991081	850	3	-0.73757	0.80822	0.82639	0.998831	12836	1	-0.73757
FBgn0000307	2	0.017563	0.032637	0.977709	851	2	-0.98291	0.98244	0.98236	0.999406	15344	0	-0.98291
FBgn0261089	6	0.017565	0.059253	0.991081	852	3	-0.25065	0.23491	0.42036	0.993966	6222	2	-0.25065
FBgn0083120	4	0.017592	0.048878	0.991081	853	2	-0.18575	0.21424	0.33717	0.991472	5847	2	-0.18575
FBgn0037027	6	0.017661	0.059523	0.991081	854	1	-0.0021675	0.38335	0.55398	0.993966	8376	1	-0.0021675
FBgn0031598	6	0.017665	0.059534	0.991081	855	2	-0.045743	0.86918	0.87086	0.998831	13631	1	-0.045743
FBgn0033468	6	0.017676	0.059562	0.991081	856	4	-0.50441	0.94992	0.94979	0.999406	14831	0	-0.50441
FBgn0034470	6	0.017704	0.059646	0.991081	857	3	-0.096294	0.18503	0.35334	0.992402	5285	3	-0.096294
FBgn0035570	6	0.017723	0.059703	0.991081	858	3	-0.30447	0.79881	0.82064	0.998831	12735	1	-0.30447
FBgn0036264	6	0.017731	0.059727	0.991081	859	3	-0.30305	0.0082791	0.032523	0.986319	468	1	-0.30305
FBgn0034275	6	0.017737	0.059746	0.991081	860	4	-0.51661	0.36019	0.53592	0.993966	8114	1	-0.51661
FBgn0051634	6	0.017809	0.05993	0.991081	861	3	-0.23214	0.79167	0.81622	0.998831	12651	1	-0.23214
FBgn0085312	6	0.017818	0.059946	0.991081	862	3	-0.61824	0.41368	0.57797	0.993966	8733	2	-0.61824
FBgn0036080	6	0.017818	0.059946	0.991081	863	3	-0.32924	0.19298	0.36417	0.993966	5442	2	-0.32924
FBgn0035722	6	0.017818	0.059946	0.991081	864	3	-0.2828	0.61068	0.73607	0.99601	11023	1	-0.2828
FBgn0000117	6	0.017837	0.060004	0.991081	865	2	-0.16799	0.86653	0.86861	0.998831	13589	1	-0.16799
FBgn0267574	4	0.01786	0.049481	0.991081	866	3	-0.33573	0.93525	0.93495	0.999406	14584	0	-0.33573
FBgn0265876	4	0.017873	0.049514	0.991081	867	1	-0.049509	0.29006	0.42221	0.993966	7151	1	-0.049509
FBgn0266357	4	0.01792	0.049618	0.991081	868	3	-0.5411	0.97484	0.9747	0.999406	15231	0	-0.5411
FBgn0051220	6	0.017965	0.060343	0.991081	869	4	-0.41976	0.38478	0.55511	0.993966	8388	1	-0.41976
FBgn0262738	6	0.018012	0.060479	0.991081	870	4	-0.60911	0.2728	0.46937	0.993966	6913	1	-0.60911
FBgn0037553	6	0.01806	0.060602	0.991081	871	4	-0.39435	0.89382	0.89364	0.999406	13961	0	-0.39435
FBgn0035733	6	0.018073	0.060635	0.991081	872	3	-0.69872	0.13651	0.28584	0.989381	4286	3	-0.69872
FBgn0005616	6	0.018073	0.060635	0.991081	873	3	-0.69751	0.84628	0.85249	0.998831	13300	1	-0.69751
FBgn0261571	6	0.018073	0.060635	0.991081	874	3	-0.63307	0.61612	0.73798	0.99601	11065	1	-0.63307
FBgn0030542	6	0.018213	0.061014	0.991081	875	4	-0.50788	0.40019	0.56731	0.993966	8576	1	-0.50788
FBgn0053263	6	0.018246	0.061102	0.991081	876	2	0.10174	0.032601	0.097915	0.986319	1422	2	0.10174
FBgn0051116	8	0.018252	0.067983	0.991081	877	3	-0.13111	0.47081	0.6834	0.993966	9400	2	-0.13111
FBgn0033247	6	0.018291	0.061213	0.991081	878	2	0.22928	0.039103	0.11341	0.986319	1626	4	0.22928
FBgn0028855	6	0.01837	0.061415	0.991081	879	3	-0.28831	0.97995	0.97998	0.999406	15306	0	-0.28831
FBgn0053454	6	0.01837	0.061415	0.991081	880	2	0.26802	0.041177	0.11827	0.986319	1702	4	0.26802
FBgn0027619	6	0.018464	0.061654	0.991081	881	4	-0.33382	0.99728	0.99724	0.999537	15582	0	-0.33382
FBgn0051955	4	0.018494	0.05089	0.991081	882	3	-0.76998	0.44544	0.54438	0.993966	9098	1	-0.76998
FBgn0265707	4	0.018494	0.05089	0.991081	883	3	-0.68871	0.64857	0.66698	0.993966	11335	1	-0.68871
FBgn0265097	4	0.018494	0.05089	0.991081	884	3	-0.61311	0.59436	0.62985	0.993966	10864	1	-0.61311
FBgn0260762	4	0.018494	0.05089	0.991081	885	3	-1.0027	0.92536	0.92499	0.999406	14439	0	-1.0027
FBgn0011760	6	0.018504	0.061767	0.991081	886	3	-0.28011	0.24519	0.43399	0.993966	6412	1	-0.28011
FBgn0010651	7	0.018511	0.066326	0.991081	887	5	-0.36176	0.9788	0.9788	0.999406	15290	0	-0.36176
FBgn0039235	6	0.01852	0.061804	0.991081	888	3	-0.38774	0.84408	0.85086	0.998831	13270	1	-0.38774
FBgn0037164	7	0.018526	0.066379	0.991081	889	3	-0.069869	0.84715	0.86827	0.998831	13310	1	-0.069869
FBgn0264617	4	0.01853	0.050969	0.991081	890	1	0.18824	0.7785	0.77787	0.996486	12538	0	0.18824
FBgn0040786	6	0.018585	0.061975	0.991081	891	2	-0.047153	0.4913	0.64067	0.993966	9642	2	-0.047153
FBgn0039197	6	0.018652	0.062148	0.991081	892	4	-0.43663	0.97524	0.9753	0.999406	15239	0	-0.43663
FBgn0085400	6	0.018666	0.062186	0.991081	893	3	-0.23181	0.55193	0.69153	0.993966	10392	2	-0.23181
FBgn0265362	6	0.018666	0.062186	0.991081	894	4	-0.39677	0.67663	0.76094	0.996486	11572	1	-0.39677
FBgn0035471	5	0.018667	0.058744	0.991081	895	1	-0.049278	0.55582	0.661	0.993966	10434	1	-0.049278
FBgn0029822	6	0.018714	0.062308	0.991081	896	2	0.1323	0.12147	0.26438	0.989381	3971	3	0.1323
FBgn0037114	2	0.018727	0.03472	0.991081	897	2	-0.56609	0.98127	0.98124	0.999406	15330	0	-0.56609
FBgn0053054	6	0.018784	0.062497	0.991081	898	2	0.40291	0.08835	0.21595	0.986319	3237	3	0.40291
FBgn0037960	5	0.018784	0.059074	0.991081	899	2	-0.013839	0.86993	0.87021	0.998831	13644	0	-0.013839
FBgn0035315	6	0.018801	0.062542	0.991081	900	2	-0.11388	0.77711	0.80802	0.998831	12519	1	-0.11388
FBgn0034681	6	0.018855	0.062698	0.991081	901	2	-0.44995	0.17452	0.33892	0.992402	5069	2	-0.44995
FBgn0050087	6	0.018873	0.062741	0.991081	902	3	-0.33876	0.96396	0.96404	0.999406	15059	0	-0.33876
FBgn0000308	7	0.018904	0.067592	0.991081	903	5	-0.51418	0.32556	0.53328	0.993966	7602	1	-0.51418
FBgn0261997	6	0.018915	0.062862	0.991081	904	2	-0.29828	0.10317	0.23776	0.988832	3578	2	-0.29828
FBgn0000439	6	0.018926	0.062889	0.991081	905	2	0.21951	0.25523	0.44715	0.993966	6598	3	0.21951
FBgn0038465	3	0.018987	0.049192	0.991081	906	2	-0.48316	0.79433	0.79404	0.997841	12681	0	-0.48316
FBgn0034566	4	0.018999	0.052032	0.991081	907	3	-0.55945	0.95986	0.95966	0.999406	14993	0	-0.55945
FBgn0265761	4	0.019	0.052035	0.991081	908	2	-0.36778	0.34956	0.48903	0.993966	7960	1	-0.36778
FBgn0038057	4	0.019045	0.052157	0.991081	909	2	-0.12101	0.30977	0.44434	0.993966	7394	2	-0.12101
FBgn0004652	13	0.01906	0.085718	0.993157	910	6	-0.26684	0.09833	0.29088	0.989381	3463	5	-0.26684
FBgn0036340	6	0.019065	0.063236	0.991081	911	3	-0.2756	0.22177	0.40286	0.993966	5972	1	-0.2756
FBgn0038092	6	0.019132	0.063411	0.991081	912	4	-0.42022	0.81296	0.82942	0.998831	12893	1	-0.42022
FBgn0265714	6	0.019132	0.063411	0.991081	913	4	-0.40911	0.34314	0.52276	0.993966	7861	1	-0.40911
FBgn0034897	6	0.019135	0.063417	0.991081	914	2	-0.38571	0.032289	0.097144	0.986319	1406	2	-0.38571
FBgn0037172	6	0.019173	0.063528	0.991081	915	3	-0.34674	0.90421	0.90394	0.999406	14119	0	-0.34674
FBgn0031659	6	0.019213	0.063634	0.991081	916	3	-0.26949	0.92255	0.9223	0.999406	14383	0	-0.26949
FBgn0264567	4	0.019252	0.052629	0.991081	917	2	-0.58437	0.1554	0.27051	0.989381	4677	1	-0.58437
FBgn0263929	7	0.019266	0.068748	0.991081	918	4	-0.48331	0.97786	0.97788	0.999406	15280	0	-0.48331
FBgn0265763	4	0.019321	0.052783	0.991081	919	3	-0.40133	0.95086	0.95069	0.999406	14848	0	-0.40133
FBgn0030692	3	0.019394	0.050153	0.991081	920	2	-0.752	0.10004	0.17463	0.986319	3503	1	-0.752
FBgn0250906	12	0.019406	0.083065	0.993157	921	4	0.035613	0.1003	0.28904	0.989381	3505	5	0.035613
FBgn0266845	6	0.019415	0.064142	0.991081	922	4	-0.36583	0.2368	0.42291	0.993966	6263	2	-0.36583
FBgn0035692	4	0.01942	0.053016	0.991081	923	2	-0.44858	0.15857	0.2741	0.989381	4752	1	-0.44858
FBgn0063495	6	0.019427	0.064172	0.991081	924	4	-0.36359	0.4471	0.60469	0.993966	9113	1	-0.36359
FBgn0033224	4	0.019428	0.053031	0.991081	925	2	-0.40551	0.85943	0.85909	0.998831	13492	0	-0.40551
FBgn0000448	8	0.019447	0.071442	0.993157	926	3	-0.24424	0.36719	0.58417	0.993966	8195	2	-0.24424
FBgn0264305	6	0.019462	0.06426	0.991081	927	3	-0.39571	0.87787	0.8784	0.998831	13756	1	-0.39571
FBgn0085582	4	0.01949	0.053188	0.991081	928	1	-0.16385	0.67898	0.6896	0.993966	11602	1	-0.16385
FBgn0050355	6	0.019505	0.06436	0.991081	929	4	-0.48299	0.98592	0.98596	0.999406	15398	0	-0.48299
FBgn0052806	3	0.019554	0.050538	0.991081	930	2	-0.70923	0.48611	0.51235	0.993966	9587	1	-0.70923
FBgn0036469	3	0.019554	0.050538	0.991081	931	2	-1.3574	0.8258	0.82547	0.998831	13045	0	-1.3574
FBgn0000283	4	0.019573	0.053359	0.991081	932	3	-0.41732	0.80083	0.80035	0.998831	12758	0	-0.41732
FBgn0085380	6	0.019589	0.064572	0.991081	933	4	-0.5077	0.41106	0.57594	0.993966	8708	1	-0.5077
FBgn0034601	6	0.019615	0.064637	0.991081	934	3	-0.31224	0.34541	0.5245	0.993966	7887	2	-0.31224
FBgn0263595	4	0.019694	0.053605	0.991081	935	3	-0.35973	0.77957	0.77896	0.996486	12551	0	-0.35973
FBgn0034075	4	0.019718	0.05366	0.991081	936	3	-0.41995	0.55073	0.60266	0.993966	10375	1	-0.41995
FBgn0050503	3	0.019738	0.050966	0.991081	937	3	-0.72146	0.98026	0.98034	0.999406	15314	0	-0.72146
FBgn0010549	3	0.019738	0.050966	0.991081	938	3	-0.72146	0.98026	0.98034	0.999406	15315	0	-0.72146
FBgn0003292	6	0.01974	0.064953	0.991081	939	3	-0.40036	0.96478	0.96483	0.999406	15071	0	-0.40036
FBgn0032790	6	0.01974	0.064953	0.991081	940	3	-0.62639	0.67844	0.76166	0.996486	11592	1	-0.62639
FBgn0267180	4	0.019748	0.05371	0.991081	941	2	-0.55752	0.83521	0.83471	0.998831	13160	0	-0.55752
FBgn0039227	6	0.019802	0.065114	0.991081	942	2	-0.11669	0.96034	0.96038	0.999406	15001	0	-0.11669
FBgn0035815	2	0.019824	0.036693	0.991081	943	2	-1.3237	0.98018	0.98009	0.999406	15311	0	-1.3237
FBgn0040251	5	0.019901	0.062181	0.991081	944	4	-0.44087	0.97648	0.97657	0.999406	15260	0	-0.44087
FBgn0036717	6	0.019907	0.06538	0.991081	945	4	-0.47067	0.88443	0.88447	0.9994	13842	1	-0.47067
FBgn0033713	5	0.019912	0.062212	0.991081	946	2	-0.058277	0.87218	0.87256	0.998831	13676	0	-0.058277
FBgn0036778	6	0.019939	0.065464	0.991081	947	4	-0.43631	0.9069	0.90659	0.999406	14149	0	-0.43631
FBgn0031818	6	0.019977	0.065549	0.991081	948	2	-0.042039	0.32951	0.51229	0.993966	7656	2	-0.042039
FBgn0032431	6	0.019992	0.065587	0.991081	949	4	-0.46651	0.85987	0.86304	0.998831	13498	1	-0.46651
FBgn0032615	6	0.020009	0.065638	0.991081	950	3	-0.37302	0.24832	0.43809	0.993966	6472	1	-0.37302
FBgn0052029	6	0.020047	0.065744	0.991081	951	3	-0.30093	0.65815	0.75357	0.996319	11411	1	-0.30093
FBgn0037398	6	0.020062	0.065779	0.991081	952	3	-0.61365	0.66381	0.7558	0.996486	11459	1	-0.61365
FBgn0259710	6	0.020103	0.065899	0.991081	953	4	-0.51677	0.4394	0.59863	0.993966	9028	2	-0.51677
FBgn0052829	6	0.020103	0.065899	0.991081	954	4	-0.32437	0.55309	0.69252	0.993966	10405	1	-0.32437
FBgn0085377	6	0.020103	0.065899	0.991081	955	4	-0.47494	0.81351	0.82977	0.998831	12901	1	-0.47494
FBgn0035092	6	0.020117	0.065933	0.991081	956	1	-0.45158	0.15788	0.31574	0.989381	4729	1	-0.45158
FBgn0039727	6	0.020126	0.065961	0.991081	957	4	-0.3483	0.98643	0.98646	0.999406	15409	0	-0.3483
FBgn0052037	6	0.020148	0.066013	0.991081	958	3	-0.52973	0.90421	0.90394	0.999406	14118	0	-0.52973
FBgn0017545	6	0.020148	0.066013	0.991081	959	3	-0.46391	0.26865	0.46451	0.993966	6839	2	-0.46391
FBgn0262856	6	0.020148	0.066013	0.991081	960	3	-0.52689	0.48373	0.63445	0.993966	9561	1	-0.52689
FBgn0033706	6	0.020156	0.066035	0.991081	961	2	0.19444	0.21604	0.3952	0.993966	5871	2	0.19444
FBgn0036108	6	0.020191	0.066118	0.991081	962	2	-0.18965	0.21094	0.38838	0.993966	5778	1	-0.18965
FBgn0035981	4	0.020201	0.054715	0.991081	963	2	-0.41039	0.90501	0.90462	0.999406	14126	0	-0.41039
FBgn0030455	4	0.020216	0.054746	0.991081	964	1	0.05346	0.50286	0.57507	0.993966	9773	1	0.05346
FBgn0266169	4	0.020238	0.054789	0.991081	965	3	-0.58589	0.70693	0.71203	0.99601	11861	1	-0.58589
FBgn0039199	6	0.020268	0.066307	0.991081	966	3	-0.028426	0.3888	0.55833	0.993966	8433	2	-0.028426
FBgn0266168	4	0.020285	0.054896	0.991081	967	2	-0.36859	0.55844	0.60726	0.993966	10474	1	-0.36859
FBgn0034552	6	0.020292	0.06637	0.991081	968	4	-0.67818	0.40068	0.56773	0.993966	8583	1	-0.67818
FBgn0261567	6	0.020321	0.06643	0.991081	969	2	0.035238	0.10796	0.24479	0.989381	3669	2	0.035238
FBgn0051823	6	0.020398	0.066624	0.991081	970	2	-0.17242	0.71192	0.77577	0.996486	11905	1	-0.17242
FBgn0037549	6	0.020422	0.066688	0.991081	971	4	-0.43363	0.24519	0.43399	0.993966	6419	1	-0.43363
FBgn0030952	6	0.020427	0.066699	0.991081	972	2	0.25286	0.18636	0.35512	0.992402	5316	3	0.25286
FBgn0262736	6	0.020427	0.066699	0.991081	973	2	0.015999	0.26569	0.46073	0.993966	6783	2	0.015999
FBgn0265710	2	0.020455	0.037814	0.991081	974	2	-1.4763	0.97954	0.97942	0.999406	15300	0	-1.4763
FBgn0038363	6	0.02046	0.066782	0.991081	975	4	-0.41131	0.98013	0.98016	0.999406	15310	0	-0.41131
FBgn0266148	4	0.02048	0.055345	0.991081	976	3	-0.4206	0.77925	0.77863	0.996486	12547	0	-0.4206
FBgn0264336	4	0.02048	0.055345	0.991081	977	3	-0.53263	0.87722	0.87676	0.998831	13746	0	-0.53263
FBgn0032864	5	0.020533	0.063911	0.991081	978	3	-0.50891	0.65845	0.71087	0.99601	11413	1	-0.50891
FBgn0039272	6	0.020538	0.066962	0.991081	979	1	0.044794	0.25323	0.44454	0.993966	6564	3	0.044794
FBgn0033571	6	0.020544	0.066977	0.991081	980	3	-0.32065	0.40319	0.56972	0.993966	8617	1	-0.32065
FBgn0261808	10	0.020554	0.081441	0.993157	981	4	-0.36395	0.48326	0.70815	0.995263	9555	2	-0.36395
FBgn0035805	6	0.020583	0.067082	0.991081	982	4	-0.31506	0.6338	0.74441	0.99601	11217	1	-0.31506
FBgn0004870	6	0.020608	0.067145	0.991081	983	3	-0.11562	0.21858	0.39868	0.993966	5921	2	-0.11562
FBgn0032843	6	0.020635	0.06721	0.991081	984	2	-0.046556	0.55373	0.69309	0.993966	10416	1	-0.046556
FBgn0035208	6	0.020754	0.067507	0.991081	985	3	-0.23376	0.58802	0.72271	0.99601	10798	2	-0.23376
FBgn0267912	8	0.020774	0.0752	0.993157	986	4	-0.26385	0.99873	0.99871	0.999537	15614	0	-0.26385
FBgn0011569	6	0.020779	0.067575	0.991081	987	4	-0.5092	0.79167	0.81622	0.998831	12653	1	-0.5092
FBgn0039040	6	0.020779	0.067575	0.991081	988	4	-0.49211	0.028223	0.087245	0.986319	1265	2	-0.49211
FBgn0262788	6	0.020783	0.067589	0.991081	989	2	0.1186	0.1676	0.3292	0.989381	4934	2	0.1186
FBgn0266992	1	0.020835	0.020792	0.950739	990	1	-0.63782	0.97917	0.9793	0.999406	15294	0	-0.63782
FBgn0003495	5	0.020871	0.064834	0.991081	991	2	-0.19986	0.093831	0.20549	0.986319	3371	2	-0.19986
FBgn0035697	6	0.020882	0.067867	0.991081	992	4	-0.26083	0.92355	0.92336	0.999406	14406	0	-0.26083
FBgn0264941	4	0.020895	0.056233	0.991081	993	2	-0.57566	0.85008	0.84954	0.998831	13358	0	-0.57566
FBgn0038630	6	0.020916	0.067963	0.991081	994	4	-0.64989	0.9473	0.94711	0.999406	14783	0	-0.64989
FBgn0034392	6	0.020977	0.068095	0.991081	995	4	-0.64161	0.23098	0.4151	0.993966	6174	1	-0.64161
FBgn0031182	6	0.020993	0.068139	0.991081	996	3	0.041616	0.062745	0.16755	0.986319	2457	3	0.041616
FBgn0265635	4	0.020999	0.056455	0.991081	997	3	-0.39514	0.93502	0.93471	0.999406	14579	0	-0.39514
FBgn0004650	6	0.021022	0.068207	0.991081	998	3	-0.3827	0.58431	0.71952	0.99601	10754	2	-0.3827
FBgn0013681	2	0.021046	0.038903	0.991081	999	2	-0.59657	0.97895	0.97885	0.999406	15291	0	-0.59657
FBgn0052832	5	0.021058	0.065363	0.991081	1000	3	-0.48325	0.0032049	0.013377	0.986319	196	1	-0.48325
FBgn0032478	6	0.021062	0.068319	0.991081	1001	4	-0.68541	0.98693	0.98697	0.999406	15415	0	-0.68541
FBgn0261933	4	0.021074	0.056624	0.991081	1002	3	-0.56942	0.95854	0.95837	0.999406	14970	0	-0.56942
FBgn0000659	5	0.021182	0.06572	0.991081	1003	3	-0.29945	0.88007	0.88044	0.998991	13784	0	-0.29945
FBgn0260431	6	0.02119	0.068653	0.991081	1004	2	-0.038182	0.83354	0.84329	0.998831	13130	1	-0.038182
FBgn0022023	6	0.021197	0.068662	0.991081	1005	3	-0.23099	0.048618	0.13556	0.986319	1962	2	-0.23099
FBgn0002733	6	0.021223	0.068726	0.991081	1006	4	-0.46479	0.92688	0.92669	0.999406	14464	0	-0.46479
FBgn0265734	4	0.021326	0.05716	0.991081	1007	3	-0.8218	0.22668	0.3511	0.992402	6089	1	-0.8218
FBgn0000635	6	0.021389	0.069155	0.991165	1008	4	-0.6747	0.90651	0.90621	0.999406	14145	0	-0.6747
FBgn0052255	6	0.021389	0.069155	0.991165	1009	3	-0.0016506	0.055676	0.15167	0.986319	2230	3	-0.0016506
FBgn0263133	6	0.021389	0.069155	0.991165	1010	2	-0.63268	0.17267	0.33628	0.990735	5038	2	-0.63268
FBgn0036491	6	0.021389	0.069155	0.991165	1011	3	-0.35086	0.53	0.6728	0.993966	10120	1	-0.35086
FBgn0263998	6	0.021449	0.069327	0.992098	1012	3	-0.088567	0.086257	0.21278	0.986319	3178	2	-0.088567
FBgn0010348	4	0.021517	0.057583	0.991081	1013	2	-0.26055	0.55727	0.60656	0.993966	10454	1	-0.26055
FBgn0032809	6	0.021519	0.069504	0.992507	1014	2	0.031062	0.24234	0.43021	0.993966	6371	2	0.031062
FBgn0034914	6	0.021589	0.069685	0.992507	1015	3	-0.47114	0.63599	0.74522	0.99601	11244	1	-0.47114
FBgn0262360	6	0.021589	0.069685	0.992507	1016	3	-0.59126	0.11761	0.25895	0.989381	3884	2	-0.59126
FBgn0038039	6	0.021589	0.069685	0.992507	1017	2	0.059634	0.12507	0.26956	0.989381	4047	3	0.059634
FBgn0034542	6	0.021624	0.069772	0.992507	1018	1	0.42974	0.14306	0.29492	0.989381	4420	3	0.42974
FBgn0260960	6	0.021654	0.069864	0.992507	1019	4	-0.47555	0.42349	0.58584	0.993966	8850	1	-0.47555
FBgn0263106	6	0.021654	0.069864	0.992507	1020	4	-0.33927	0.34541	0.5245	0.993966	7886	2	-0.33927
FBgn0029801	6	0.021713	0.069997	0.992592	1021	4	-0.23031	0.86918	0.87086	0.998831	13632	1	-0.23031
FBgn0029993	4	0.021714	0.058031	0.991081	1022	1	0.23971	0.25959	0.38798	0.993966	6667	2	0.23971
FBgn0053494	5	0.021749	0.067285	0.991081	1023	3	-0.90454	0.94225	0.94244	0.999406	14685	0	-0.90454
FBgn0031654	6	0.021752	0.07009	0.993021	1024	4	-0.34281	0.74165	0.78969	0.997775	12179	1	-0.34281
FBgn0039920	7	0.02181	0.076612	0.993157	1025	4	-0.76202	0.039864	0.12449	0.986319	1656	2	-0.76202
FBgn0029814	5	0.021821	0.067505	0.991081	1026	4	-0.28759	0.35374	0.50263	0.993966	8024	1	-0.28759
FBgn0004595	10	0.02183	0.08541	0.993157	1027	4	-0.26398	0.95364	0.95941	0.999406	14892	1	-0.26398
FBgn0038053	6	0.021843	0.070309	0.993157	1028	3	-0.25177	0.9087	0.90834	0.999406	14178	0	-0.25177
FBgn0035824	5	0.021862	0.067614	0.991081	1029	4	-0.26758	0.98453	0.98463	0.999406	15371	0	-0.26758
FBgn0035334	4	0.02188	0.058379	0.991081	1030	3	-0.95335	0.99187	0.99193	0.999406	15503	0	-0.95335
FBgn0263078	6	0.021893	0.070424	0.993157	1031	3	-0.34069	0.95104	0.95092	0.999406	14853	0	-0.34069
FBgn0034629	6	0.021935	0.070524	0.993157	1032	3	-0.39361	0.53168	0.67422	0.993966	10144	1	-0.39361
FBgn0032015	4	0.022041	0.058725	0.991081	1033	3	-0.39576	0.5527	0.60383	0.993966	10400	1	-0.39576
FBgn0034456	6	0.022044	0.070804	0.993157	1034	1	0.043446	0.053007	0.14558	0.986319	2142	2	0.043446
FBgn0265657	4	0.022046	0.058733	0.991081	1035	3	-0.56734	0.93001	0.92963	0.999406	14509	0	-0.56734
FBgn0030824	4	0.022088	0.058833	0.991081	1036	1	-0.058026	0.59969	0.6333	0.993966	10941	1	-0.058026
FBgn0050464	6	0.022088	0.070907	0.993157	1037	2	0.042642	0.86433	0.86677	0.998831	13569	1	0.042642
FBgn0266861	4	0.02213	0.058917	0.991081	1038	3	-0.41613	0.13468	0.24694	0.989381	4240	1	-0.41613
FBgn0028950	6	0.022149	0.071073	0.993157	1039	2	0.16638	0.16919	0.33139	0.989381	4967	2	0.16638
FBgn0033762	6	0.022223	0.071257	0.993157	1040	4	-0.75976	0.98947	0.9895	0.999406	15457	0	-0.75976
FBgn0042110	6	0.022223	0.071257	0.993157	1041	4	-0.63988	0.69258	0.7675	0.996486	11721	1	-0.63988
FBgn0031722	6	0.022272	0.071386	0.993157	1042	2	-0.34161	0.78864	0.81452	0.998831	12633	1	-0.34161
FBgn0267917	4	0.022275	0.059247	0.991081	1043	3	-0.40604	0.70934	0.71406	0.99601	11883	1	-0.40604
FBgn0265944	4	0.022275	0.05925	0.991081	1044	2	-0.2133	0.12171	0.23212	0.98878	3978	2	-0.2133
FBgn0029848	4	0.022321	0.059332	0.991081	1045	1	0.20421	0.023207	0.061945	0.986319	1068	2	0.20421
FBgn0263051	5	0.022378	0.069023	0.991165	1046	4	-0.29683	0.83163	0.83229	0.998831	13106	1	-0.29683
FBgn0001099	3	0.022418	0.057576	0.991081	1047	1	-0.055558	0.72723	0.72727	0.99601	12048	0	-0.055558
FBgn0037375	7	0.022425	0.078519	0.993157	1048	3	-0.27454	0.91744	0.91751	0.999406	14315	1	-0.27454
FBgn0033697	6	0.022429	0.07181	0.993157	1049	1	0.042514	0.92781	0.92762	0.999406	14476	0	0.042514
FBgn0000163	6	0.022432	0.071815	0.993157	1050	2	-0.14866	0.55271	0.69218	0.993966	10402	1	-0.14866
FBgn0013576	24	0.022469	0.11681	0.993157	1051	10	-0.098571	0.35039	0.70517	0.994741	7975	8	-0.098571
FBgn0037611	2	0.02249	0.041511	0.991081	1052	1	0.01495	0.044712	0.08028	0.986319	1832	1	0.01495
FBgn0022355	6	0.022514	0.072008	0.993157	1053	4	-0.39399	0.89475	0.89456	0.999406	13974	0	-0.39399
FBgn0034356	6	0.022531	0.072054	0.993157	1054	3	-0.23307	0.084916	0.21078	0.986319	3144	2	-0.23307
FBgn0014391	6	0.022533	0.07206	0.993157	1055	3	-0.25013	0.093706	0.22381	0.988718	3368	3	-0.25013
FBgn0038135	6	0.022533	0.07206	0.993157	1056	4	-0.46983	0.54197	0.68301	0.993966	10250	2	-0.46983
FBgn0051460	4	0.022559	0.059843	0.991081	1057	2	-0.2063	0.1612	0.27713	0.989381	4800	1	-0.2063
FBgn0031224	6	0.022569	0.072141	0.993157	1058	2	-0.24308	0.23046	0.41442	0.993966	6154	1	-0.24308
FBgn0031115	6	0.02263	0.072299	0.993157	1059	2	-0.17174	0.71116	0.77542	0.996486	11899	1	-0.17174
FBgn0260866	6	0.022639	0.072321	0.993157	1060	1	0.18285	0.16628	0.32738	0.989381	4902	2	0.18285
FBgn0010453	6	0.022673	0.072406	0.993157	1061	2	-0.14401	0.97466	0.9747	0.999406	15228	0	-0.14401
FBgn0010488	6	0.022735	0.072571	0.993157	1062	4	-0.73852	0.024738	0.078623	0.986319	1134	2	-0.73852
FBgn0267098	4	0.022775	0.060324	0.991081	1063	2	-0.60772	0.94677	0.94656	0.999406	14774	0	-0.60772
FBgn0032147	7	0.022778	0.07958	0.993157	1064	1	-0.0020845	0.023838	0.082955	0.986319	1094	2	-0.0020845
FBgn0267158	4	0.022839	0.06046	0.991081	1065	3	-0.60994	0.76301	0.76258	0.996486	12387	1	-0.60994
FBgn0030990	6	0.022841	0.072835	0.993157	1066	3	-0.29816	0.79435	0.81786	0.998831	12682	1	-0.29816
FBgn0030895	5	0.022846	0.07027	0.993157	1067	1	-0.10051	0.64974	0.70625	0.994741	11344	1	-0.10051
FBgn0036005	6	0.022849	0.072851	0.993157	1068	3	-0.3227	0.87453	0.87548	0.998831	13699	1	-0.3227
FBgn0033767	4	0.022864	0.060515	0.991081	1069	2	-0.092485	0.26555	0.39471	0.993966	6781	2	-0.092485
FBgn0266742	4	0.022895	0.060584	0.991081	1070	3	-0.43742	0.23528	0.36077	0.993966	6227	1	-0.43742
FBgn0030734	7	0.022904	0.079974	0.993157	1071	5	-0.56138	0.94866	0.94861	0.999406	14811	0	-0.56138
FBgn0261531	6	0.022919	0.073044	0.993157	1072	2	-0.41479	0.33531	0.51666	0.993966	7741	2	-0.41479
FBgn0039849	8	0.022919	0.081318	0.993157	1073	3	0.014221	0.48766	0.69232	0.993966	9611	2	0.014221
FBgn0030798	7	0.022928	0.080061	0.993157	1074	4	-0.56261	0.80077	0.84574	0.998831	12755	1	-0.56261
FBgn0022349	8	0.022949	0.081407	0.993157	1075	2	0.035897	0.33443	0.55201	0.993966	7723	1	0.035897
FBgn0037051	6	0.023093	0.073499	0.993157	1076	1	0.084702	0.09862	0.23116	0.98878	3468	2	0.084702
FBgn0028526	6	0.023093	0.073499	0.993157	1077	1	0.21016	0.026576	0.083154	0.986319	1202	3	0.21016
FBgn0039523	6	0.023128	0.073584	0.993157	1078	4	-0.34772	0.67028	0.75835	0.996486	11513	1	-0.34772
FBgn0032705	6	0.023146	0.073629	0.993157	1079	3	-0.23475	0.97227	0.97236	0.999406	15193	0	-0.23475
FBgn0267984	4	0.023186	0.061224	0.991081	1080	3	-0.44776	0.74619	0.74661	0.99601	12225	1	-0.44776
FBgn0264952	4	0.023193	0.061244	0.991081	1081	3	-0.38336	0.97273	0.97249	0.999406	15205	0	-0.38336
FBgn0030616	6	0.023198	0.073754	0.993157	1082	2	-0.041648	0.059816	0.16102	0.986319	2379	2	-0.041648
FBgn0266837	4	0.023215	0.061298	0.991081	1083	2	-0.70135	0.9694	0.96915	0.999406	15149	0	-0.70135
FBgn0032654	6	0.023253	0.073891	0.993157	1084	3	-0.501	0.98947	0.9895	0.999406	15458	0	-0.501
FBgn0030016	6	0.023253	0.073891	0.993157	1085	3	-0.18135	0.96478	0.96483	0.999406	15069	0	-0.18135
FBgn0264676	4	0.023262	0.06139	0.991081	1086	3	-0.56455	0.71513	0.71897	0.99601	11948	1	-0.56455
FBgn0032901	6	0.023338	0.0741	0.993157	1087	4	-0.74264	0.96941	0.96952	0.999406	15151	0	-0.74264
FBgn0266846	4	0.023406	0.06173	0.991081	1088	3	-0.4683	0.66352	0.67789	0.993966	11456	1	-0.4683
FBgn0029716	6	0.023409	0.074264	0.993157	1089	2	0.4682	0.02279	0.073754	0.986319	1059	4	0.4682
FBgn0039153	6	0.023442	0.074343	0.993157	1090	4	-0.486	0.13591	0.28504	0.989381	4259	2	-0.486
FBgn0263761	6	0.023442	0.074343	0.993157	1091	4	-0.37197	0.86784	0.86974	0.998831	13605	1	-0.37197
FBgn0086673	6	0.023442	0.074343	0.993157	1092	3	-0.66915	0.43557	0.59559	0.993966	8986	1	-0.66915
FBgn0034683	6	0.023442	0.074343	0.993157	1093	4	-0.73918	0.54394	0.68476	0.993966	10281	1	-0.73918
FBgn0031535	6	0.023442	0.074343	0.993157	1094	3	-0.13533	0.85564	0.85964	0.998831	13425	1	-0.13533
FBgn0000384	6	0.023442	0.074343	0.993157	1095	4	-0.555	0.94629	0.9461	0.999406	14768	0	-0.555
FBgn0037764	6	0.023447	0.074355	0.993157	1096	4	-0.39932	0.92439	0.92418	0.999406	14418	0	-0.39932
FBgn0034866	6	0.023478	0.074437	0.993157	1097	2	0.19063	0.052081	0.14344	0.986319	2104	3	0.19063
FBgn0000179	7	0.023512	0.081848	0.993157	1098	2	0.33501	0.050853	0.14782	0.986319	2053	4	0.33501
FBgn0026430	4	0.023513	0.061945	0.991081	1099	1	0.42314	0.0077041	0.026098	0.986319	436	3	0.42314
FBgn0262686	6	0.023548	0.074619	0.993157	1100	3	-0.35517	0.0069682	0.027758	0.986319	399	2	-0.35517
FBgn0260648	6	0.023618	0.074776	0.993157	1101	2	0.44094	0.011779	0.044821	0.986319	631	4	0.44094
FBgn0283625	4	0.023674	0.062323	0.991081	1102	3	-0.53682	0.09455	0.20124	0.986319	3381	1	-0.53682
FBgn0035155	6	0.023758	0.075144	0.993157	1103	2	0.010898	0.12925	0.27558	0.989381	4135	2	0.010898
FBgn0267626	4	0.02377	0.062513	0.991081	1104	1	-0.18317	0.85298	0.85248	0.998831	13389	0	-0.18317
FBgn0039703	6	0.023788	0.075209	0.993157	1105	4	-0.29943	0.59009	0.72451	0.99601	10817	2	-0.29943
FBgn0034423	6	0.023828	0.075305	0.993157	1106	3	0.013319	0.21402	0.39255	0.993966	5841	3	0.013319
FBgn0028789	6	0.02383	0.075313	0.993157	1107	4	-0.53331	0.8574	0.86106	0.998831	13451	1	-0.53331
FBgn0085219	6	0.02383	0.075313	0.993157	1108	4	-0.61626	0.73473	0.78633	0.997238	12118	1	-0.61626
FBgn0265894	6	0.02383	0.075313	0.993157	1109	4	-0.73153	0.9193	0.91896	0.999406	14335	0	-0.73153
FBgn0031564	6	0.02383	0.075313	0.993157	1110	4	-0.4671	0.10133	0.23507	0.98878	3535	2	-0.4671
FBgn0038233	4	0.023835	0.062638	0.991081	1111	2	-0.29402	0.81855	0.81803	0.998831	12961	0	-0.29402
FBgn0013983	4	0.023896	0.062784	0.991081	1112	3	-1.0294	0.99187	0.99193	0.999406	15500	0	-1.0294
FBgn0034558	6	0.023897	0.075475	0.993157	1113	1	-0.12261	0.46741	0.62114	0.993966	9359	1	-0.12261
FBgn0262737	7	0.02391	0.083065	0.993157	1114	4	-0.41249	0.971	0.97097	0.999406	15175	0	-0.41249
FBgn0267639	4	0.023933	0.062861	0.991081	1115	2	-0.34674	0.73558	0.73685	0.99601	12126	1	-0.34674
FBgn0034657	2	0.023983	0.044226	0.991081	1116	2	-1.0419	0.97602	0.97592	0.999406	15250	0	-1.0419
FBgn0026385	6	0.024002	0.075738	0.993157	1117	2	-0.1311	0.010614	0.040691	0.986319	569	2	-0.1311
FBgn0263402	5	0.024036	0.073529	0.993157	1118	4	-0.33591	0.71891	0.74616	0.99601	11977	1	-0.33591
FBgn0034052	6	0.024107	0.076004	0.993157	1119	1	0.28706	0.055238	0.15069	0.986319	2220	4	0.28706
FBgn0036226	6	0.024137	0.076083	0.993157	1120	2	-0.13612	0.39655	0.56446	0.993966	8532	1	-0.13612
FBgn0265166	4	0.024163	0.063353	0.991081	1121	3	-0.71954	0.35327	0.49315	0.993966	8021	1	-0.71954
FBgn0264568	4	0.024163	0.063353	0.991081	1122	3	-0.75766	0.99187	0.99193	0.999406	15502	0	-0.75766
FBgn0034154	6	0.024177	0.076199	0.993157	1123	3	-0.1318	0.5011	0.64871	0.993966	9754	2	-0.1318
FBgn0261561	12	0.024228	0.099451	0.993157	1124	4	-0.13949	0.11308	0.31546	0.989381	3779	5	-0.13949
FBgn0039077	6	0.024268	0.076427	0.993157	1125	4	-0.50485	0.30707	0.49518	0.993966	7355	1	-0.50485
FBgn0259735	8	0.024269	0.085163	0.993157	1126	4	-0.30662	0.59441	0.75172	0.99601	10870	2	-0.30662
FBgn0011305	1	0.024276	0.024184	0.954966	1127	1	-0.77903	0.97572	0.97583	0.999406	15246	0	-0.77903
FBgn0037166	6	0.024334	0.076603	0.993157	1128	3	-0.45446	0.8535	0.85794	0.998831	13399	1	-0.45446
FBgn0037081	4	0.024358	0.063784	0.991081	1129	3	-0.95221	0.90746	0.90714	0.999406	14157	0	-0.95221
FBgn0003373	6	0.024405	0.076777	0.993157	1130	2	0.032572	0.57695	0.71307	0.99601	10667	2	0.032572
FBgn0030744	8	0.024421	0.085611	0.993157	1131	5	-0.66464	0.056188	0.17026	0.986319	2252	1	-0.66464
FBgn0003308	6	0.024456	0.076911	0.993157	1132	1	0.019828	0.30621	0.4945	0.993966	7345	1	0.019828
FBgn0263102	11	0.024498	0.098021	0.993157	1133	3	-0.14494	0.32834	0.58892	0.993966	7639	2	-0.14494
FBgn0262739	8	0.024502	0.085855	0.993157	1134	1	0.26777	0.039592	0.12775	0.986319	1649	5	0.26777
FBgn0264907	7	0.024512	0.084898	0.993157	1135	4	-0.49286	0.058227	0.16288	0.986319	2318	1	-0.49286
FBgn0266592	4	0.024516	0.064124	0.991081	1136	2	-0.028976	0.67698	0.68806	0.993966	11577	1	-0.028976
FBgn0266569	6	0.02452	0.077077	0.993157	1137	3	-0.47298	0.78864	0.81452	0.998831	12635	1	-0.47298
FBgn0034021	6	0.024526	0.077095	0.993157	1138	1	0.18023	0.58281	0.71817	0.99601	10738	2	0.18023
FBgn0003867	6	0.024596	0.077274	0.993157	1139	1	0.083534	0.31001	0.49738	0.993966	7399	2	0.083534
FBgn0260871	6	0.024619	0.077324	0.993157	1140	4	-0.459	0.62449	0.74098	0.99601	11126	1	-0.459
FBgn0267035	4	0.024645	0.064431	0.991081	1141	3	-0.59221	0.32352	0.45981	0.993966	7579	1	-0.59221
FBgn0017572	6	0.024651	0.077413	0.993157	1142	4	-0.5604	0.58812	0.7228	0.99601	10802	1	-0.5604
FBgn0083979	6	0.024651	0.077413	0.993157	1143	4	-0.57584	0.45213	0.60878	0.993966	9170	2	-0.57584
FBgn0267615	4	0.024656	0.064459	0.991081	1144	2	-0.23676	0.58635	0.62465	0.993966	10780	1	-0.23676
FBgn0028887	6	0.02468	0.077492	0.993157	1145	2	0.3303	0.043991	0.1249	0.986319	1807	4	0.3303
FBgn0033541	6	0.024736	0.077617	0.993157	1146	1	-0.57312	0.65097	0.75075	0.99601	11356	1	-0.57312
FBgn0267471	4	0.02475	0.06466	0.991081	1147	2	0.0090268	0.73269	0.73437	0.99601	12099	1	0.0090268
FBgn0026479	6	0.024764	0.077691	0.993157	1148	2	0.45046	0.027686	0.085917	0.986319	1240	3	0.45046
FBgn0023388	5	0.024769	0.075518	0.993157	1149	2	0.19328	0.024915	0.075974	0.986319	1139	2	0.19328
FBgn0267232	2	0.024774	0.045573	0.991081	1150	2	-1.1241	0.97523	0.97515	0.999406	15238	0	-1.1241
FBgn0033015	6	0.024907	0.078039	0.993157	1151	4	-0.28323	0.93481	0.93468	0.999406	14576	0	-0.28323
FBgn0267065	4	0.024979	0.065137	0.991081	1152	2	-0.56255	0.69999	0.70637	0.994741	11809	1	-0.56255
FBgn0010803	6	0.024992	0.078245	0.993157	1153	4	-0.47071	0.89926	0.89907	0.999406	14051	0	-0.47071
FBgn0262886	1	0.02503	0.024952	0.954966	1154	1	-1.2232	0.97497	0.97506	0.999406	15233	0	-1.2232
FBgn0034943	6	0.025061	0.078424	0.993157	1155	4	-0.31506	0.16159	0.32089	0.989381	4812	1	-0.31506
FBgn0261617	9	0.02511	0.095472	0.993157	1156	4	-0.19641	0.23564	0.46733	0.993966	6233	2	-0.19641
FBgn0036353	6	0.025119	0.078568	0.993157	1157	3	-0.26326	0.7354	0.78665	0.997238	12124	1	-0.26326
FBgn0037327	8	0.025153	0.087698	0.993157	1158	2	0.18027	0.080962	0.22055	0.986319	3041	4	0.18027
FBgn0265345	4	0.025154	0.065533	0.991081	1159	3	-0.67249	0.9542	0.95398	0.999406	14901	0	-0.67249
FBgn0265880	4	0.025154	0.065533	0.991081	1160	3	-0.9663	0.72792	0.73012	0.99601	12057	1	-0.9663
FBgn0033508	6	0.025155	0.078669	0.993157	1161	1	0.26695	0.20368	0.37877	0.993966	5629	3	0.26695
FBgn0027836	7	0.025182	0.086989	0.993157	1162	3	-0.085683	0.66125	0.78449	0.996737	11443	1	-0.085683
FBgn0266651	4	0.025193	0.06562	0.991081	1163	1	-0.24441	0.56769	0.61289	0.993966	10580	1	-0.24441
FBgn0267668	10	0.025242	0.096018	0.993157	1164	4	-0.2554	0.45058	0.68511	0.993966	9150	1	-0.2554
FBgn0038307	6	0.025327	0.079112	0.993157	1165	2	0.10189	0.13601	0.28517	0.989381	4261	2	0.10189
FBgn0262140	6	0.025362	0.079196	0.993157	1166	3	-0.24369	0.052698	0.14487	0.986319	2129	2	-0.24369
FBgn0266688	4	0.025425	0.066119	0.991081	1167	3	-0.40262	0.93671	0.93643	0.999406	14602	0	-0.40262
FBgn0034538	6	0.025438	0.079398	0.993157	1168	3	-0.34394	0.99213	0.99216	0.999406	15510	0	-0.34394
FBgn0264714	6	0.025483	0.079499	0.993157	1169	2	-0.011209	0.36725	0.54143	0.993966	8200	2	-0.011209
FBgn0032914	6	0.025503	0.079547	0.993157	1170	3	-0.26254	0.19103	0.36151	0.993966	5393	2	-0.26254
FBgn0051451	2	0.025507	0.046887	0.991081	1171	1	-0.64705	0.8989	0.8985	0.999406	14046	0	-0.64705
FBgn0266042	4	0.025521	0.066323	0.991081	1172	3	-0.44947	0.86839	0.86797	0.998831	13616	0	-0.44947
FBgn0267221	4	0.025566	0.06641	0.991081	1173	2	-0.13339	0.26318	0.39206	0.993966	6733	1	-0.13339
FBgn0266116	4	0.025566	0.06641	0.991081	1174	3	-0.68122	0.79202	0.79147	0.997841	12658	0	-0.68122
FBgn0013972	6	0.025574	0.079725	0.993157	1175	1	0.088769	0.12899	0.27521	0.989381	4129	2	0.088769
FBgn0264005	6	0.025643	0.079889	0.993157	1176	1	-0.16496	0.31108	0.49817	0.993966	7414	1	-0.16496
FBgn0035679	4	0.025706	0.066708	0.991081	1177	3	-0.35654	0.42025	0.53173	0.993966	8813	1	-0.35654
FBgn0034997	6	0.025713	0.08007	0.993157	1178	4	-0.62225	0.89085	0.89072	0.999406	13923	0	-0.62225
FBgn0024291	6	0.025751	0.080167	0.993157	1179	2	-0.1649	0.96222	0.96229	0.999406	15029	0	-0.1649
FBgn0003464	5	0.025764	0.078253	0.993157	1180	3	-0.27754	0.83327	0.83387	0.998831	13128	1	-0.27754
FBgn0041097	6	0.025783	0.080247	0.993157	1181	1	-0.20873	0.78864	0.81452	0.998831	12634	1	-0.20873
FBgn0028552	6	0.025806	0.080315	0.993157	1182	4	-0.28955	0.40952	0.57469	0.993966	8699	1	-0.28955
FBgn0039889	6	0.025818	0.080346	0.993157	1183	4	-0.36842	0.39402	0.56245	0.993966	8501	2	-0.36842
FBgn0047199	6	0.025818	0.080346	0.993157	1184	4	-0.32654	0.698	0.76974	0.996486	11776	1	-0.32654
FBgn0263607	6	0.02584	0.080403	0.993157	1185	4	-0.44383	0.42461	0.5867	0.993966	8867	2	-0.44383
FBgn0040827	6	0.025901	0.080552	0.993157	1186	4	-0.37151	0.97351	0.97358	0.999406	15213	0	-0.37151
FBgn0036547	6	0.02595	0.080663	0.993157	1187	4	-0.25809	0.50568	0.65254	0.993966	9804	2	-0.25809
FBgn0030317	6	0.026021	0.080849	0.993157	1188	4	-0.30467	0.34816	0.5266	0.993966	7939	2	-0.30467
FBgn0035715	6	0.026021	0.080849	0.993157	1189	3	-0.3437	0.068487	0.18026	0.986319	2651	1	-0.3437
FBgn0035335	4	0.026022	0.067383	0.991081	1190	3	-0.50213	0.66744	0.68085	0.993966	11492	1	-0.50213
FBgn0264483	4	0.026022	0.067383	0.991081	1191	3	-0.46632	0.5087	0.57828	0.993966	9848	1	-0.46632
FBgn0046706	6	0.026062	0.080961	0.993157	1192	3	-0.47933	0.77232	0.80545	0.998831	12465	1	-0.47933
FBgn0263072	6	0.026132	0.081112	0.993157	1193	1	-0.053022	0.53443	0.67651	0.993966	10175	1	-0.053022
FBgn0033047	6	0.026147	0.081143	0.993157	1194	4	-0.28186	0.73488	0.7864	0.997238	12120	1	-0.28186
FBgn0264794	4	0.026155	0.067664	0.991081	1195	2	-0.26318	0.63869	0.65987	0.993966	11266	1	-0.26318
FBgn0265998	17	0.02616	0.11829	0.993157	1196	6	-0.029437	0.33996	0.65534	0.993966	7809	4	-0.029437
FBgn0000008	6	0.026204	0.081284	0.993157	1197	3	-0.37047	0.1071	0.2435	0.989381	3657	3	-0.37047
FBgn0026388	6	0.026236	0.081364	0.993157	1198	1	-0.060194	0.9365	0.93639	0.999406	14600	0	-0.060194
FBgn0053198	6	0.026286	0.081493	0.993157	1199	4	-0.42782	0.082006	0.20644	0.986319	3075	2	-0.42782
FBgn0263617	6	0.026286	0.081493	0.993157	1200	4	-0.39512	0.96582	0.96589	0.999406	15092	0	-0.39512
FBgn0039552	6	0.026286	0.081493	0.993157	1201	4	-0.55029	0.058121	0.15722	0.986319	2312	1	-0.55029
FBgn0037506	6	0.026286	0.081493	0.993157	1202	4	-0.34864	0.76329	0.80067	0.998831	12389	1	-0.34864
FBgn0266322	4	0.026335	0.068038	0.991081	1203	2	-0.42774	0.073429	0.16449	0.986319	2826	1	-0.42774
FBgn0052563	6	0.026341	0.081616	0.993157	1204	3	-0.30873	0.96873	0.96884	0.999406	15135	0	-0.30873
FBgn0267636	4	0.026382	0.068141	0.991081	1205	2	-0.39996	0.18411	0.30307	0.989381	5261	1	-0.39996
FBgn0037561	6	0.026411	0.081811	0.993157	1206	2	0.045092	0.19551	0.36761	0.993966	5487	2	0.045092
FBgn0085329	6	0.026434	0.081864	0.993157	1207	4	-0.50424	0.22736	0.4103	0.993966	6097	1	-0.50424
FBgn0029969	6	0.026439	0.08187	0.993157	1208	3	-0.37505	0.32023	0.50507	0.993966	7527	1	-0.37505
FBgn0265831	4	0.026475	0.068341	0.991081	1209	1	0.07854	0.10157	0.20927	0.986319	3541	2	0.07854
FBgn0054011	6	0.02648	0.08197	0.993157	1210	2	-0.62284	0.41252	0.57709	0.993966	8725	1	-0.62284
FBgn0001404	7	0.026524	0.090993	0.993157	1211	3	-0.23406	0.18039	0.36619	0.993966	5185	2	-0.23406
FBgn0066365	6	0.026583	0.082223	0.993157	1212	3	-0.22972	0.1081	0.24495	0.989381	3682	2	-0.22972
FBgn0264840	4	0.026606	0.068631	0.991081	1213	3	-0.27497	0.085181	0.18682	0.986319	3152	1	-0.27497
FBgn0044511	4	0.026755	0.068944	0.991165	1214	3	-0.49997	0.88221	0.88178	0.998991	13814	0	-0.49997
FBgn0267172	3	0.026767	0.067953	0.991081	1215	1	-0.93823	0.78071	0.78051	0.996486	12559	0	-0.93823
FBgn0037911	6	0.026782	0.082715	0.993157	1216	3	-0.4012	0.16343	0.32343	0.989381	4845	2	-0.4012
FBgn0054028	6	0.026792	0.082735	0.993157	1217	4	-0.34487	0.9707	0.97083	0.999406	15171	0	-0.34487
FBgn0266094	4	0.026871	0.069198	0.991165	1218	2	-0.30232	0.29034	0.42253	0.993966	7157	1	-0.30232
FBgn0039806	6	0.026899	0.083017	0.993157	1219	1	0.40583	0.042105	0.12047	0.986319	1746	3	0.40583
FBgn0031090	6	0.026907	0.083044	0.993157	1220	4	-0.78749	0.86784	0.86974	0.998831	13606	1	-0.78749
FBgn0037900	5	0.026952	0.08155	0.993157	1221	2	-0.073621	0.16886	0.32696	0.989381	4962	2	-0.073621
FBgn0008636	6	0.026996	0.083232	0.993157	1222	3	-0.19348	0.017485	0.060213	0.986319	851	2	-0.19348
FBgn0033542	6	0.026996	0.083232	0.993157	1223	3	-0.52576	0.19717	0.36992	0.993966	5515	1	-0.52576
FBgn0267544	4	0.027012	0.069506	0.992507	1224	2	-0.77659	0.88975	0.88925	0.999406	13910	0	-0.77659
FBgn0036951	6	0.027038	0.083329	0.993157	1225	3	-0.29238	0.35378	0.53093	0.993966	8029	2	-0.29238
FBgn0037015	6	0.027131	0.083551	0.993157	1226	3	-0.33122	0.95957	0.95961	0.999406	14988	0	-0.33122
FBgn0029657	6	0.027135	0.083559	0.993157	1227	3	-0.14795	0.67844	0.76166	0.996486	11595	1	-0.14795
FBgn0037280	6	0.027191	0.083705	0.993157	1228	4	-0.20985	0.45012	0.60715	0.993966	9142	2	-0.20985
FBgn0033886	4	0.02722	0.069993	0.992592	1229	2	-1.0638	0.44105	0.54214	0.993966	9051	1	-1.0638
FBgn0265725	6	0.027247	0.083855	0.993157	1230	2	-0.26961	0.42583	0.5877	0.993966	8883	1	-0.26961
FBgn0000592	6	0.027275	0.083935	0.993157	1231	3	-0.42907	0.6208	0.73966	0.99601	11101	1	-0.42907
FBgn0023180	6	0.027284	0.08396	0.993157	1232	4	-0.33114	0.82488	0.83726	0.998831	13032	1	-0.33114
FBgn0015338	6	0.027411	0.084291	0.993157	1233	4	-0.38979	0.59631	0.73005	0.99601	10898	1	-0.38979
FBgn0031276	6	0.027423	0.084331	0.993157	1234	2	-0.10526	0.61847	0.73882	0.99601	11083	1	-0.10526
FBgn0267949	4	0.027453	0.070484	0.993157	1235	2	-0.41897	0.53064	0.5908	0.993966	10131	1	-0.41897
FBgn0040355	6	0.027462	0.084432	0.993157	1236	3	-0.41161	0.91235	0.91208	0.999406	14240	0	-0.41161
FBgn0033429	1	0.027514	0.027439	0.954966	1237	1	-1.1409	0.97249	0.97261	0.999406	15201	0	-1.1409
FBgn0036725	6	0.027585	0.084744	0.993157	1238	2	-0.0755	0.72861	0.7834	0.996699	12061	1	-0.0755
FBgn0259745	8	0.027615	0.094625	0.993157	1239	2	0.21575	0.025389	0.089419	0.986319	1151	4	0.21575
FBgn0034446	6	0.027652	0.084901	0.993157	1240	4	-0.68151	0.9565	0.95646	0.999406	14937	0	-0.68151
FBgn0037726	6	0.027652	0.084901	0.993157	1241	4	-0.66731	0.71137	0.77551	0.996486	11901	1	-0.66731
FBgn0050412	6	0.027652	0.084901	0.993157	1242	4	-0.64741	0.895	0.89481	0.999406	13979	0	-0.64741
FBgn0032224	6	0.027652	0.084901	0.993157	1243	4	-0.43357	0.13779	0.28763	0.989381	4327	2	-0.43357
FBgn0085383	6	0.027652	0.084901	0.993157	1244	4	-0.60793	0.99649	0.99647	0.999537	15572	0	-0.60793
FBgn0267763	4	0.027674	0.070986	0.993157	1245	3	-0.56036	0.96752	0.96732	0.999406	15122	0	-0.56036
FBgn0050339	6	0.027686	0.084988	0.993157	1246	2	0.0036402	0.11623	0.25697	0.989381	3855	1	0.0036402
FBgn0263656	6	0.027686	0.084988	0.993157	1247	3	-0.30834	0.0037451	0.015886	0.986319	227	2	-0.30834
FBgn0262791	2	0.027691	0.050682	0.991081	1248	2	-0.7768	0.97231	0.9722	0.999406	15198	0	-0.7768
FBgn0039266	8	0.027802	0.09516	0.993157	1249	3	-0.058613	0.5581	0.73086	0.99601	10463	2	-0.058613
FBgn0035730	6	0.027805	0.085284	0.993157	1250	3	-0.19331	0.1524	0.30804	0.989381	4607	2	-0.19331
FBgn0267069	4	0.027811	0.071292	0.993157	1251	2	-0.47503	0.97785	0.97781	0.999406	15279	0	-0.47503
FBgn0267033	6	0.02791	0.085548	0.993157	1252	4	-0.25899	0.023021	0.074356	0.986319	1063	2	-0.25899
FBgn0002855	6	0.027999	0.085783	0.993157	1253	4	-0.43059	0.96453	0.96458	0.999406	15065	0	-0.43059
FBgn0264823	4	0.028058	0.071816	0.993157	1254	2	-0.17564	0.83282	0.83232	0.998831	13119	0	-0.17564
FBgn0026389	6	0.028083	0.08598	0.993157	1255	4	-0.66731	0.46465	0.61893	0.993966	9326	2	-0.66731
FBgn0004171	6	0.028083	0.085981	0.993157	1256	2	-0.23973	0.9478	0.94763	0.999406	14795	0	-0.23973
FBgn0261113	10	0.028103	0.10476	0.993157	1257	4	-0.31647	0.44863	0.68372	0.993966	9125	1	-0.31647
FBgn0034520	6	0.028106	0.086041	0.993157	1258	2	-0.073927	0.34815	0.5266	0.993966	7933	1	-0.073927
FBgn0031478	5	0.028114	0.084748	0.993157	1259	1	0.63585	0.0043488	0.016905	0.986319	252	4	0.63585
FBgn0031830	6	0.028188	0.086237	0.993157	1260	2	0.0024343	0.22416	0.40602	0.993966	6021	3	0.0024343
FBgn0035258	6	0.028218	0.086315	0.993157	1261	4	-0.4185	0.46968	0.623	0.993966	9392	1	-0.4185
FBgn0039744	6	0.028292	0.08649	0.993157	1262	2	-0.11417	0.31069	0.49789	0.993966	7406	2	-0.11417
FBgn0263605	6	0.028345	0.086638	0.993157	1263	2	-0.07505	0.22113	0.40199	0.993966	5962	2	-0.07505
FBgn0052006	6	0.028345	0.086638	0.993157	1264	2	-0.40899	0.76139	0.79962	0.99877	12370	1	-0.40899
FBgn0267726	6	0.028345	0.086638	0.993157	1265	2	-0.39901	0.17868	0.34463	0.992402	5150	1	-0.39901
FBgn0034194	6	0.028345	0.086638	0.993157	1266	2	-0.058191	0.43012	0.59116	0.993966	8923	2	-0.058191
FBgn0050413	6	0.028362	0.086679	0.993157	1267	4	-0.39792	0.99556	0.99559	0.999537	15559	0	-0.39792
FBgn0032096	6	0.028419	0.086809	0.993157	1268	4	-0.2674	0.032717	0.098187	0.986319	1426	2	-0.2674
FBgn0267070	4	0.028449	0.072635	0.993157	1269	3	-0.4412	0.71988	0.72303	0.99601	11982	1	-0.4412
FBgn0265591	4	0.028449	0.072635	0.993157	1270	3	-0.55448	0.96591	0.9657	0.999406	15094	0	-0.55448
FBgn0038578	4	0.028449	0.072635	0.993157	1271	3	-0.41172	0.78387	0.78332	0.996699	12587	0	-0.41172
FBgn0261992	6	0.028571	0.087198	0.993157	1272	1	0.4323	0.011898	0.045215	0.986319	643	5	0.4323
FBgn0026181	4	0.02859	0.072934	0.993157	1273	3	-0.42782	0.96099	0.96079	0.999406	15012	0	-0.42782
FBgn0033696	4	0.028616	0.072993	0.993157	1274	1	0.39737	0.029793	0.076149	0.986319	1321	2	0.39737
FBgn0011642	6	0.028646	0.087389	0.993157	1275	4	-0.51166	0.95586	0.95582	0.999406	14925	0	-0.51166
FBgn0265376	4	0.028663	0.073113	0.993157	1276	2	-0.33003	0.090484	0.19664	0.986319	3296	1	-0.33003
FBgn0051320	6	0.028673	0.087463	0.993157	1277	3	-0.0010623	0.062017	0.16594	0.986319	2434	3	-0.0010623
FBgn0039030	6	0.028779	0.087753	0.993157	1278	3	-0.20363	0.055472	0.1512	0.986319	2225	2	-0.20363
FBgn0003701	6	0.028793	0.087786	0.993157	1279	3	-0.4877	0.8654	0.86764	0.998831	13578	1	-0.4877
FBgn0266849	4	0.028866	0.07356	0.993157	1280	2	-0.40355	0.95854	0.95837	0.999406	14969	0	-0.40355
FBgn0266236	4	0.028885	0.0736	0.993157	1281	3	-0.46982	0.6083	0.63886	0.993966	11008	1	-0.46982
FBgn0033164	6	0.028969	0.088228	0.993157	1282	3	-0.33362	0.97938	0.97939	0.999406	15298	0	-0.33362
FBgn0032884	6	0.029001	0.088303	0.993157	1283	3	-0.35224	0.55171	0.69135	0.993966	10386	1	-0.35224
FBgn0262024	6	0.029001	0.088303	0.993157	1284	3	-0.68344	0.56336	0.70133	0.994255	10532	2	-0.68344
FBgn0260386	6	0.029002	0.088308	0.993157	1285	4	-0.35579	0.17127	0.33428	0.99029	5015	2	-0.35579
FBgn0051313	6	0.029002	0.088308	0.993157	1286	4	-0.63316	0.32708	0.51042	0.993966	7620	1	-0.63316
FBgn0030683	5	0.029023	0.087211	0.993157	1287	2	-0.16269	0.79621	0.80109	0.998831	12706	1	-0.16269
FBgn0265991	9	0.029039	0.10565	0.993157	1288	5	-0.54812	0.98703	0.98701	0.999406	15417	0	-0.54812
FBgn0259968	5	0.029043	0.087267	0.993157	1289	3	-0.4564	0.40891	0.5552	0.993966	8691	1	-0.4564
FBgn0032658	5	0.029048	0.087278	0.993157	1290	3	-0.72812	0.91494	0.91509	0.999406	14275	0	-0.72812
FBgn0011745	6	0.029065	0.088479	0.993157	1291	3	-0.21901	0.19863	0.3719	0.993966	5547	2	-0.21901
FBgn0031441	4	0.029081	0.074033	0.993157	1292	2	-0.11997	0.60268	0.63525	0.993966	10966	1	-0.11997
FBgn0029878	6	0.029093	0.088535	0.993157	1293	1	0.077455	0.069259	0.18197	0.986319	2689	2	0.077455
FBgn0037894	6	0.0291	0.088548	0.993157	1294	4	-0.26302	0.99279	0.99283	0.999537	15522	0	-0.26302
FBgn0036859	6	0.029112	0.088568	0.993157	1295	3	-0.12008	0.21568	0.39472	0.993966	5867	3	-0.12008
FBgn0004832	4	0.029174	0.074238	0.993157	1296	2	-0.29974	0.94376	0.94354	0.999406	14714	0	-0.29974
FBgn0026563	6	0.029217	0.088844	0.993157	1297	2	-0.038929	0.3593	0.53524	0.993966	8108	2	-0.038929
FBgn0265963	4	0.029244	0.074389	0.993157	1298	2	-0.55322	0.33541	0.47318	0.993966	7742	1	-0.55322
FBgn0043043	6	0.029351	0.089169	0.993157	1299	4	-0.54086	0.90428	0.90401	0.999406	14120	0	-0.54086
FBgn0010282	6	0.029351	0.089169	0.993157	1300	4	-0.27865	0.97176	0.97189	0.999406	15185	0	-0.27865
FBgn0033673	6	0.029351	0.089169	0.993157	1301	4	-0.31792	0.0069682	0.027758	0.986319	400	2	-0.31792
FBgn0086253	6	0.029351	0.089169	0.993157	1302	4	-0.60552	0.96866	0.96876	0.999406	15133	0	-0.60552
FBgn0000996	6	0.029352	0.08917	0.993157	1303	3	-0.3495	0.50589	0.65275	0.993966	9806	2	-0.3495
FBgn0036031	6	0.029371	0.08922	0.993157	1304	3	-0.50574	0.99634	0.99633	0.999537	15570	0	-0.50574
FBgn0025878	6	0.029434	0.089395	0.993157	1305	3	-0.1448	0.51049	0.65652	0.993966	9868	2	-0.1448
FBgn0037697	6	0.029434	0.089395	0.993157	1306	3	-0.0891	0.20774	0.38417	0.993966	5706	3	-0.0891
FBgn0053526	5	0.029502	0.088457	0.993157	1307	3	-0.29477	0.9248	0.92505	0.999406	14429	0	-0.29477
FBgn0053170	6	0.029506	0.089557	0.993157	1308	3	-0.29866	0.97035	0.97048	0.999406	15167	0	-0.29866
FBgn0030157	5	0.029507	0.08847	0.993157	1309	1	-0.015157	0.78655	0.79348	0.997841	12608	1	-0.015157
FBgn0035968	8	0.029555	0.10002	0.993157	1310	4	-0.30731	0.57795	0.74212	0.99601	10676	1	-0.30731
FBgn0032230	6	0.029578	0.089748	0.993157	1311	3	-0.041397	0.052408	0.14417	0.986319	2116	2	-0.041397
FBgn0032734	6	0.029578	0.089748	0.993157	1312	2	-0.26904	0.11237	0.25121	0.989381	3765	1	-0.26904
FBgn0033954	6	0.029645	0.089919	0.993157	1313	3	-0.14448	0.22846	0.41178	0.993966	6116	2	-0.14448
FBgn0026431	6	0.029647	0.089927	0.993157	1314	4	-0.44733	0.43283	0.59339	0.993966	8945	2	-0.44733
FBgn0085279	6	0.029647	0.089927	0.993157	1315	4	-0.58042	0.54038	0.68168	0.993966	10233	2	-0.58042
FBgn0041174	6	0.029647	0.089927	0.993157	1316	4	-0.517	0.91671	0.91635	0.999406	14303	0	-0.517
FBgn0015572	6	0.029649	0.089931	0.993157	1317	2	0.074502	0.5272	0.67041	0.993966	10089	2	0.074502
FBgn0265187	4	0.029757	0.075468	0.993157	1318	2	-0.13355	0.044643	0.1071	0.986319	1831	2	-0.13355
FBgn0262881	6	0.029823	0.090364	0.993157	1319	3	-0.20065	0.63526	0.74495	0.99601	11229	1	-0.20065
FBgn0023213	6	0.029835	0.090393	0.993157	1320	2	0.43428	0.0062137	0.025052	0.986319	355	4	0.43428
FBgn0029958	4	0.029881	0.075752	0.993157	1321	3	-0.70561	0.47997	0.56263	0.993966	9519	1	-0.70561
FBgn0030668	6	0.029892	0.090526	0.993157	1322	4	-0.2571	0.58506	0.72012	0.99601	10762	1	-0.2571
FBgn0031044	6	0.029975	0.090731	0.993157	1323	2	-0.063844	0.29589	0.48674	0.993966	7228	2	-0.063844
FBgn0053111	2	0.029987	0.054705	0.991081	1324	2	-0.65576	0.97001	0.96994	0.999406	15162	0	-0.65576
FBgn0267590	4	0.029988	0.075974	0.993157	1325	1	0.42993	0.039218	0.095944	0.986319	1628	2	0.42993
FBgn0026148	6	0.030024	0.090851	0.993157	1326	2	0.37766	0.0018103	0.0082591	0.969686	120	4	0.37766
FBgn0013276	6	0.030066	0.090951	0.993157	1327	3	-0.38989	0.98558	0.9856	0.999406	15390	0	-0.38989
FBgn0032132	6	0.030087	0.091001	0.993157	1328	2	-0.01217	0.35168	0.52933	0.993966	7998	2	-0.01217
FBgn0265694	4	0.030104	0.07623	0.993157	1329	1	-0.044993	0.78387	0.78332	0.996699	12586	0	-0.044993
FBgn0033203	2	0.030113	0.054927	0.991081	1330	1	-0.3051	0.24858	0.27924	0.989381	6479	1	-0.3051
FBgn0036899	6	0.030117	0.09107	0.993157	1331	4	-0.82852	0.36913	0.54283	0.993966	8227	2	-0.82852
FBgn0052547	6	0.030171	0.091194	0.993157	1332	3	-0.75789	0.58773	0.72246	0.99601	10796	1	-0.75789
FBgn0034925	4	0.030243	0.076527	0.993157	1333	2	-0.664	0.96438	0.96421	0.999406	15064	0	-0.664
FBgn0041100	6	0.030269	0.091436	0.993157	1334	4	-0.46337	0.92878	0.92861	0.999406	14495	0	-0.46337
FBgn0032100	6	0.030364	0.091678	0.993157	1335	4	-0.36159	0.35378	0.53093	0.993966	8028	2	-0.36159
FBgn0015300	6	0.030379	0.091718	0.993157	1336	1	0.20468	0.43283	0.59339	0.993966	8950	2	0.20468
FBgn0263647	6	0.030381	0.091725	0.993157	1337	2	-0.074205	0.34728	0.52593	0.993966	7917	1	-0.074205
FBgn0002872	5	0.030435	0.090934	0.993157	1338	2	-0.69785	0.24847	0.40398	0.993966	6478	2	-0.69785
FBgn0032873	6	0.030473	0.091958	0.993157	1339	3	-0.49898	0.28485	0.47846	0.993966	7079	2	-0.49898
FBgn0052939	2	0.030475	0.055536	0.991081	1340	2	-1.2872	0.96953	0.96948	0.999406	15152	0	-1.2872
FBgn0032188	6	0.030522	0.092088	0.993157	1341	3	-0.20197	0.30038	0.49005	0.993966	7275	1	-0.20197
FBgn0038132	6	0.030543	0.092149	0.993157	1342	2	-0.12363	0.49398	0.64289	0.993966	9664	1	-0.12363
FBgn0037044	2	0.030546	0.055667	0.991081	1343	1	-0.75899	0.46828	0.46972	0.993966	9376	1	-0.75899
FBgn0263916	6	0.030593	0.092276	0.993157	1344	3	-0.29051	0.39592	0.56396	0.993966	8522	1	-0.29051
FBgn0033708	6	0.030657	0.092422	0.993157	1345	1	0.069396	0.2677	0.4633	0.993966	6821	1	0.069396
FBgn0033985	6	0.030683	0.092481	0.993157	1346	4	-0.46082	0.066906	0.17677	0.986319	2596	1	-0.46082
FBgn0029642	6	0.030683	0.092481	0.993157	1347	4	-0.51717	0.25359	0.44497	0.993966	6570	2	-0.51717
FBgn0039225	6	0.030683	0.092481	0.993157	1348	4	-0.45895	0.93187	0.93171	0.999406	14525	0	-0.45895
FBgn0032493	6	0.030683	0.092481	0.993157	1349	4	-0.6512	0.77232	0.80545	0.998831	12459	1	-0.6512
FBgn0035583	6	0.030683	0.092481	0.993157	1350	4	-0.71019	0.41809	0.58147	0.993966	8788	1	-0.71019
FBgn0032247	6	0.030683	0.092481	0.993157	1351	4	-0.45094	0.95308	0.953	0.999406	14885	0	-0.45094
FBgn0262150	6	0.030683	0.092481	0.993157	1352	4	-0.66532	0.84018	0.84806	0.998831	13220	1	-0.66532
FBgn0000153	6	0.030699	0.092508	0.993157	1353	2	-0.097678	0.60286	0.73341	0.99601	10967	1	-0.097678
FBgn0003089	6	0.030727	0.09258	0.993157	1354	3	-0.068119	0.56673	0.70422	0.994741	10567	2	-0.068119
FBgn0265089	6	0.030727	0.09258	0.993157	1355	3	-0.41353	0.45188	0.60858	0.993966	9164	2	-0.41353
FBgn0034716	6	0.030727	0.09258	0.993157	1356	3	-0.27623	0.88637	0.88633	0.999406	13861	1	-0.27623
FBgn0034861	10	0.030764	0.11282	0.993157	1357	4	0.0088956	0.21473	0.45081	0.993966	5857	3	0.0088956
FBgn0031774	6	0.030769	0.092674	0.993157	1358	3	-0.24937	0.13754	0.28729	0.989381	4321	2	-0.24937
FBgn0052523	5	0.030839	0.091813	0.993157	1359	2	-0.83431	0.37154	0.51952	0.993966	8257	1	-0.83431
FBgn0033748	5	0.030839	0.091813	0.993157	1360	2	0.0361	0.67906	0.72234	0.99601	11603	1	0.0361
FBgn0036124	6	0.030865	0.092885	0.993157	1361	2	-0.12471	0.34816	0.5266	0.993966	7941	2	-0.12471
FBgn0035632	4	0.030905	0.077933	0.993157	1362	3	-0.31449	0.98665	0.98667	0.999406	15412	0	-0.31449
FBgn0266771	4	0.030912	0.077949	0.993157	1363	2	-0.089746	0.33597	0.47381	0.993966	7747	2	-0.089746
FBgn0035273	6	0.030935	0.093025	0.993157	1364	1	0.23191	0.09146	0.22049	0.986319	3321	3	0.23191
FBgn0263077	10	0.03097	0.11341	0.993157	1365	6	-0.3108	0.28614	0.53452	0.993966	7096	3	-0.3108
FBgn0030269	5	0.030986	0.092112	0.993157	1366	3	-0.41996	0.040235	0.11195	0.986319	1669	2	-0.41996
FBgn0002914	6	0.030989	0.093163	0.993157	1367	3	-0.27303	0.35548	0.53226	0.993966	8056	2	-0.27303
FBgn0026324	6	0.031004	0.09319	0.993157	1368	3	-0.31345	0.32225	0.50665	0.993966	7556	1	-0.31345
FBgn0263623	4	0.031058	0.078265	0.993157	1369	3	-0.38474	0.92248	0.92216	0.999406	14382	0	-0.38474
FBgn0027560	6	0.031074	0.093354	0.993157	1370	3	-0.57595	0.56518	0.70288	0.994513	10549	1	-0.57595
FBgn0053349	6	0.031078	0.093366	0.993157	1371	3	-0.6564	0.69948	0.7704	0.996486	11794	1	-0.6564
FBgn0266935	4	0.031106	0.078367	0.993157	1372	2	-0.14555	0.64857	0.66698	0.993966	11333	1	-0.14555
FBgn0041180	6	0.031109	0.093437	0.993157	1373	4	-0.49596	0.9158	0.91549	0.999406	14290	0	-0.49596
FBgn0024432	6	0.031145	0.093524	0.993157	1374	3	-0.3262	0.44364	0.60192	0.993966	9080	2	-0.3262
FBgn0040907	2	0.031157	0.056712	0.991081	1375	2	-0.29463	0.96884	0.96881	0.999406	15139	0	-0.29463
FBgn0265151	4	0.031175	0.078524	0.993157	1376	2	-0.10885	0.50715	0.57743	0.993966	9822	1	-0.10885
FBgn0038890	6	0.031178	0.093586	0.993157	1377	2	-0.32386	0.25955	0.45278	0.993966	6665	3	-0.32386
FBgn0028490	6	0.03128	0.093832	0.993157	1378	2	-0.18283	0.8613	0.86422	0.998831	13522	1	-0.18283
FBgn0266912	4	0.031287	0.078742	0.993157	1379	3	-0.44076	0.9431	0.94288	0.999406	14700	0	-0.44076
FBgn0014073	6	0.031299	0.093874	0.993157	1380	4	-0.34629	0.71349	0.77649	0.996486	11931	1	-0.34629
FBgn0265700	4	0.031312	0.078799	0.993157	1381	1	-0.1387	0.12964	0.24116	0.989381	4141	2	-0.1387
FBgn0030349	6	0.031317	0.093919	0.993157	1382	2	-0.25826	0.83156	0.84187	0.998831	13104	1	-0.25826
FBgn0035203	6	0.031317	0.093919	0.993157	1383	3	-0.25069	0.50844	0.65483	0.993966	9844	2	-0.25069
FBgn0052354	6	0.031327	0.09394	0.993157	1384	4	-0.47254	0.99665	0.99662	0.999537	15574	0	-0.47254
FBgn0026179	10	0.031382	0.11463	0.993157	1385	4	-0.11092	0.96813	0.96913	0.999406	15126	1	-0.11092
FBgn0035686	6	0.031389	0.094102	0.993157	1386	3	-0.34542	0.33085	0.51326	0.993966	7677	2	-0.34542
FBgn0038006	6	0.031417	0.094159	0.993157	1387	4	-0.66002	0.20666	0.38273	0.993966	5688	1	-0.66002
FBgn0031623	6	0.031421	0.094167	0.993157	1388	2	-0.32894	0.35079	0.5286	0.993966	7980	1	-0.32894
FBgn0033400	6	0.031427	0.094179	0.993157	1389	4	-0.37051	0.31899	0.50411	0.993966	7510	1	-0.37051
FBgn0038214	5	0.031478	0.093044	0.993157	1390	3	-0.54284	0.7399	0.75966	0.996486	12166	1	-0.54284
FBgn0264253	6	0.031479	0.094301	0.993157	1391	3	-0.65879	0.71863	0.77883	0.996486	11974	1	-0.65879
FBgn0034513	6	0.031491	0.094331	0.993157	1392	2	-0.065106	0.09182	0.22102	0.986819	3327	2	-0.065106
FBgn0031682	5	0.031602	0.093276	0.993157	1393	3	-0.46291	0.93401	0.93417	0.999406	14566	0	-0.46291
FBgn0031171	6	0.031629	0.094684	0.993157	1394	3	-0.49986	0.19685	0.36945	0.993966	5509	1	-0.49986
FBgn0033192	6	0.03168	0.094796	0.993157	1395	2	0.078779	0.2192	0.39948	0.993966	5928	3	0.078779
FBgn0030122	4	0.031681	0.079578	0.993157	1396	3	-0.52698	0.96529	0.96508	0.999406	15077	0	-0.52698
FBgn0017457	1	0.031692	0.031607	0.97638	1397	1	-0.78061	0.96831	0.96855	0.999406	15127	0	-0.78061
FBgn0035282	6	0.031699	0.094843	0.993157	1398	2	0.10037	0.028397	0.087671	0.986319	1270	3	0.10037
FBgn0036180	4	0.031723	0.079651	0.993157	1399	2	-0.33104	0.55844	0.60726	0.993966	10478	1	-0.33104
FBgn0267743	4	0.031767	0.079751	0.993157	1400	3	-0.56352	0.60495	0.6367	0.993966	10982	1	-0.56352
FBgn0085230	6	0.031787	0.09506	0.993157	1401	3	-0.098228	0.90025	0.90003	0.999406	14064	0	-0.098228
FBgn0029176	6	0.0318	0.095095	0.993157	1402	3	-0.38359	0.68555	0.76459	0.996486	11658	1	-0.38359
FBgn0038082	6	0.031803	0.095102	0.993157	1403	3	-0.59009	0.23032	0.41424	0.993966	6151	2	-0.59009
FBgn0037386	6	0.031859	0.09524	0.993157	1404	3	-0.38067	0.74937	0.79349	0.997841	12254	1	-0.38067
FBgn0032878	6	0.031868	0.095263	0.993157	1405	4	-0.46995	0.7221	0.78039	0.996486	12009	1	-0.46995
FBgn0028407	6	0.031916	0.095394	0.993157	1406	3	-0.22496	0.45076	0.6077	0.993966	9152	1	-0.22496
FBgn0052103	8	0.031985	0.10684	0.993157	1407	3	0.11398	0.058862	0.17701	0.986319	2347	4	0.11398
FBgn0028550	6	0.032046	0.095713	0.993157	1408	3	-0.15774	0.91473	0.91438	0.999406	14272	0	-0.15774
FBgn0026314	6	0.032053	0.095728	0.993157	1409	3	-0.53386	0.59726	0.7309	0.99601	10911	1	-0.53386
FBgn0053194	6	0.03211	0.095875	0.993157	1410	4	-0.41629	0.28294	0.47705	0.993966	7050	1	-0.41629
FBgn0039887	6	0.03215	0.095973	0.993157	1411	2	-0.13628	0.92221	0.92195	0.999406	14373	0	-0.13628
FBgn0261588	6	0.032175	0.096038	0.993157	1412	2	0.46314	0.032014	0.096465	0.986319	1397	4	0.46314
FBgn0040093	6	0.032268	0.096266	0.993157	1413	4	-0.44798	0.9955	0.99554	0.999537	15558	0	-0.44798
FBgn0262146	4	0.032286	0.080831	0.993157	1414	2	-0.14162	0.24821	0.37512	0.993966	6471	1	-0.14162
FBgn0034165	6	0.03229	0.096319	0.993157	1415	3	-0.64116	0.058223	0.15747	0.986319	2316	2	-0.64116
FBgn0051148	6	0.032323	0.096401	0.993157	1416	1	0.20351	0.20368	0.37877	0.993966	5630	3	0.20351
FBgn0005533	1	0.03234	0.032285	0.977709	1417	1	-3.5842	0.96766	0.96793	0.999406	15125	0	-3.5842
FBgn0034031	23	0.032397	0.15214	0.993157	1418	10	-0.22257	0.081994	0.29915	0.989381	3071	10	-0.22257
FBgn0266916	4	0.032404	0.081077	0.993157	1419	3	-0.78594	0.86452	0.86416	0.998831	13571	0	-0.78594
FBgn0010198	4	0.032404	0.081077	0.993157	1420	3	-0.49657	0.83465	0.83418	0.998831	13154	0	-0.49657
FBgn0036988	5	0.032457	0.094883	0.993157	1421	3	-0.19212	0.81482	0.81703	0.998831	12922	1	-0.19212
FBgn0026259	2	0.032467	0.05903	0.991081	1422	2	-0.70896	0.96753	0.9675	0.999406	15124	0	-0.70896
FBgn0250814	6	0.03247	0.096781	0.993157	1423	4	-0.66111	0.91679	0.91644	0.999406	14306	0	-0.66111
FBgn0050491	6	0.03247	0.096781	0.993157	1424	4	-0.37507	0.97227	0.97236	0.999406	15194	0	-0.37507
FBgn0024698	3	0.032508	0.076422	0.993157	1425	2	-0.74107	0.59166	0.59726	0.993966	10833	1	-0.74107
FBgn0267679	4	0.032509	0.081307	0.993157	1426	2	-0.64812	0.051899	0.12166	0.986319	2094	2	-0.64812
FBgn0261702	4	0.032509	0.081307	0.993157	1427	2	-0.53192	0.54876	0.60146	0.993966	10335	1	-0.53192
FBgn0026619	9	0.032519	0.11453	0.993157	1428	4	-0.086928	0.83145	0.90357	0.999406	13103	1	-0.086928
FBgn0035063	3	0.032533	0.076459	0.993157	1429	2	-0.22288	0.10765	0.18507	0.986319	3661	1	-0.22288
FBgn0034565	4	0.032564	0.081423	0.993157	1430	2	-0.50421	0.92201	0.92168	0.999406	14370	0	-0.50421
FBgn0032895	6	0.032591	0.097073	0.993157	1431	4	-0.4583	0.93364	0.93349	0.999406	14560	0	-0.4583
FBgn0038665	6	0.032591	0.097073	0.993157	1432	3	-0.37173	0.53129	0.67389	0.993966	10135	1	-0.37173
FBgn0264725	6	0.032601	0.097094	0.993157	1433	3	-0.060531	0.25976	0.45304	0.993966	6671	2	-0.060531
FBgn0004778	6	0.03267	0.097244	0.993157	1434	2	-0.14011	0.8565	0.86034	0.998831	13439	1	-0.14011
FBgn0036301	6	0.03274	0.09742	0.993157	1435	1	-0.10583	0.12597	0.2709	0.989381	4063	1	-0.10583
FBgn0265169	4	0.03275	0.081805	0.993157	1436	1	-0.061241	0.67215	0.68441	0.993966	11532	1	-0.061241
FBgn0265545	2	0.032768	0.059575	0.991081	1437	1	-0.58486	0.73023	0.72978	0.99601	12082	0	-0.58486
FBgn0267166	4	0.032802	0.081924	0.993157	1438	3	-0.363	0.34482	0.48373	0.993966	7878	1	-0.363
FBgn0035548	6	0.032809	0.097597	0.993157	1439	2	0.16557	0.21331	0.39161	0.993966	5822	2	0.16557
FBgn0040365	6	0.032812	0.097604	0.993157	1440	3	-0.34482	0.68555	0.76459	0.996486	11660	1	-0.34482
FBgn0085419	6	0.032847	0.097691	0.993157	1441	3	-0.66854	0.99232	0.99237	0.999406	15515	0	-0.66854
FBgn0039257	6	0.032979	0.098004	0.993157	1442	2	-0.14703	0.96319	0.96327	0.999406	15046	0	-0.14703
FBgn0034144	6	0.033017	0.098097	0.993157	1443	3	-0.079	0.12127	0.26411	0.989381	3969	3	-0.079
FBgn0265266	5	0.033039	0.096013	0.993157	1444	3	-0.21017	0.95507	0.95527	0.999406	14915	0	-0.21017
FBgn0050383	6	0.033041	0.098162	0.993157	1445	4	-1.0227	0.93385	0.9337	0.999406	14564	0	-1.0227
FBgn0027564	6	0.033041	0.098162	0.993157	1446	4	-0.5146	0.97928	0.9793	0.999406	15296	0	-0.5146
FBgn0029503	6	0.033041	0.098162	0.993157	1447	4	-0.60322	0.4025	0.56919	0.993966	8606	2	-0.60322
FBgn0038355	6	0.033041	0.098162	0.993157	1448	4	-0.81689	0.92486	0.92468	0.999406	14431	0	-0.81689
FBgn0040370	6	0.033041	0.098162	0.993157	1449	4	-0.33757	0.88871	0.88855	0.999406	13893	1	-0.33757
FBgn0038438	6	0.033041	0.098162	0.993157	1450	4	-0.49164	0.98925	0.98928	0.999406	15454	0	-0.49164
FBgn0002937	6	0.033152	0.098399	0.993157	1451	3	-0.18465	0.066233	0.17524	0.986319	2579	1	-0.18465
FBgn0010296	6	0.033183	0.098483	0.993157	1452	2	-0.0047588	0.47085	0.62393	0.993966	9403	2	-0.0047588
FBgn0262003	6	0.033183	0.098483	0.993157	1453	4	-0.27819	0.087082	0.21403	0.986319	3207	2	-0.27819
FBgn0024945	6	0.033183	0.098483	0.993157	1454	3	-0.50405	0.55521	0.69432	0.993966	10427	2	-0.50405
FBgn0052024	6	0.033183	0.098483	0.993157	1455	3	-0.27871	0.2655	0.46048	0.993966	6775	2	-0.27871
FBgn0040385	6	0.03319	0.0985	0.993157	1456	2	0.063176	0.5423	0.68331	0.993966	10254	2	0.063176
FBgn0042187	4	0.033306	0.082989	0.993157	1457	1	0.045903	0.77518	0.77453	0.996486	12500	0	0.045903
FBgn0266898	4	0.033306	0.082989	0.993157	1458	2	0.050485	0.58532	0.62398	0.993966	10766	1	0.050485
FBgn0265174	6	0.033377	0.098932	0.993157	1459	3	-0.07156	0.49124	0.64062	0.993966	9641	2	-0.07156
FBgn0267737	4	0.033422	0.083237	0.993157	1460	1	-0.055338	0.89785	0.89746	0.999406	14024	0	-0.055338
FBgn0038186	6	0.033477	0.099177	0.993157	1461	4	-0.30555	0.80553	0.8247	0.998831	12812	1	-0.30555
FBgn0035695	6	0.033483	0.099192	0.993157	1462	4	-0.23731	0.97969	0.97971	0.999406	15301	0	-0.23731
FBgn0038558	6	0.033502	0.099242	0.993157	1463	4	-0.30659	0.98925	0.98928	0.999406	15455	0	-0.30659
FBgn0003983	6	0.033559	0.099397	0.993157	1464	3	-0.61968	0.73438	0.78616	0.997238	12113	1	-0.61968
FBgn0033405	6	0.033572	0.099428	0.993157	1465	2	0.05659	0.22685	0.40962	0.993966	6091	2	0.05659
FBgn0031842	6	0.033687	0.099715	0.993157	1466	4	-0.28185	0.81136	0.82843	0.998831	12871	1	-0.28185
FBgn0260482	6	0.03371	0.099762	0.993157	1467	2	-0.063516	0.19198	0.3628	0.993966	5422	3	-0.063516
FBgn0000274	6	0.03378	0.099947	0.993157	1468	3	-0.14231	0.22737	0.41031	0.993966	6101	2	-0.14231
FBgn0050375	6	0.033797	0.099989	0.993157	1469	4	-0.37963	0.99156	0.99158	0.999406	15493	0	-0.37963
FBgn0261995	6	0.033811	0.10002	0.993157	1470	3	0.025741	0.038349	0.11162	0.986319	1604	3	0.025741
FBgn0036875	10	0.033814	0.12193	0.993157	1471	3	-0.11981	0.21714	0.45367	0.993966	5889	4	-0.11981
FBgn0034727	2	0.033843	0.061424	0.991081	1472	2	-0.84878	0.96047	0.96044	0.999406	15004	0	-0.84878
FBgn0050293	6	0.033918	0.10029	0.993157	1473	2	-0.015308	0.88651	0.88644	0.999406	13863	1	-0.015308
FBgn0002781	7	0.03398	0.10895	0.993157	1474	2	-0.10613	0.10054	0.24626	0.989381	3512	3	-0.10613
FBgn0036948	6	0.033988	0.10044	0.993157	1475	3	-0.37983	0.77315	0.80589	0.998831	12471	1	-0.37983
FBgn0267631	4	0.033998	0.084471	0.993157	1476	2	-0.11007	0.54565	0.59957	0.993966	10303	1	-0.11007
FBgn0038123	6	0.034088	0.1007	0.993157	1477	3	-0.35256	0.46741	0.62114	0.993966	9358	1	-0.35256
FBgn0039511	6	0.034088	0.1007	0.993157	1478	3	-0.68929	0.39879	0.56624	0.993966	8559	2	-0.68929
FBgn0051200	6	0.034088	0.1007	0.993157	1479	3	-1.2056	0.35771	0.534	0.993966	8089	2	-1.2056
FBgn0036677	6	0.034088	0.1007	0.993157	1480	3	-0.8875	0.86464	0.86703	0.998831	13573	1	-0.8875
FBgn0033395	6	0.034088	0.1007	0.993157	1481	3	-0.87476	0.8798	0.88015	0.998915	13780	1	-0.87476
FBgn0005391	6	0.034088	0.1007	0.993157	1482	3	-0.24396	0.6456	0.74874	0.99601	11319	1	-0.24396
FBgn0000492	6	0.034126	0.10079	0.993157	1483	4	-0.6819	0.96735	0.96741	0.999406	15107	0	-0.6819
FBgn0021995	8	0.034151	0.11276	0.993157	1484	5	-0.28818	0.013563	0.055632	0.986319	707	2	-0.28818
FBgn0266893	4	0.034181	0.084871	0.993157	1485	3	-0.78392	0.9263	0.92595	0.999406	14451	0	-0.78392
FBgn0003514	4	0.034181	0.084871	0.993157	1486	2	-0.45825	0.56321	0.61018	0.993966	10524	1	-0.45825
FBgn0003515	6	0.034265	0.10115	0.993157	1487	2	0.19493	0.23074	0.41478	0.993966	6168	3	0.19493
FBgn0033459	6	0.034271	0.10117	0.993157	1488	3	-0.45854	0.78531	0.81259	0.998831	12601	1	-0.45854
FBgn0029084	6	0.034271	0.10117	0.993157	1489	2	-0.029482	0.077991	0.20043	0.986319	2965	2	-0.029482
FBgn0036935	6	0.034281	0.10119	0.993157	1490	4	-0.50451	0.47266	0.62538	0.993966	9431	1	-0.50451
FBgn0036775	6	0.034281	0.10119	0.993157	1491	4	-0.58348	0.92439	0.92418	0.999406	14416	0	-0.58348
FBgn0050047	6	0.034334	0.10132	0.993157	1492	1	0.2838	0.069419	0.18233	0.986319	2701	4	0.2838
FBgn0032836	6	0.034403	0.1015	0.993157	1493	1	0.54092	0.00073471	0.0038481	0.969686	55	5	0.54092
FBgn0036154	6	0.034472	0.10166	0.993157	1494	2	0.81441	0.0028344	0.012349	0.986319	171	4	0.81441
FBgn0038049	6	0.0345	0.10174	0.993157	1495	2	-0.030753	0.14809	0.302	0.989381	4519	3	-0.030753
FBgn0033133	6	0.0345	0.10174	0.993157	1496	2	-0.10727	0.051999	0.14326	0.986319	2099	3	-0.10727
FBgn0263663	6	0.0345	0.10174	0.993157	1497	2	-0.93783	0.50503	0.65197	0.993966	9795	2	-0.93783
FBgn0033421	6	0.0345	0.10174	0.993157	1498	3	-0.10016	0.8798	0.88015	0.998915	13779	1	-0.10016
FBgn0028341	15	0.0345	0.14037	0.993157	1499	4	-0.19579	0.29182	0.59604	0.993966	7172	3	-0.19579
FBgn0001208	6	0.034576	0.10191	0.993157	1500	1	-0.18261	0.3054	0.49385	0.993966	7335	2	-0.18261
FBgn0003676	2	0.034609	0.062741	0.991081	1501	2	-0.75941	0.96539	0.96537	0.999406	15079	0	-0.75941
FBgn0031941	6	0.034686	0.10217	0.993157	1502	2	-0.28811	0.94868	0.94854	0.999406	14813	0	-0.28811
FBgn0036327	4	0.034686	0.085898	0.993157	1503	3	-0.35545	0.065863	0.14971	0.986319	2570	1	-0.35545
FBgn0039198	4	0.034736	0.085996	0.993157	1504	2	-0.20015	0.46877	0.55663	0.993966	9384	1	-0.20015
FBgn0085438	6	0.034738	0.1023	0.993157	1505	3	-0.19128	0.8688	0.87054	0.998831	13621	1	-0.19128
FBgn0264902	4	0.034809	0.086146	0.993157	1506	2	-0.8766	0.92176	0.92142	0.999406	14366	0	-0.8766
FBgn0020371	6	0.034816	0.10247	0.993157	1507	3	-0.35534	0.59483	0.72872	0.99601	10875	1	-0.35534
FBgn0040747	6	0.034816	0.10247	0.993157	1508	3	-0.66784	0.98105	0.98107	0.999406	15328	0	-0.66784
FBgn0250835	6	0.034816	0.10247	0.993157	1509	3	-0.36765	0.84282	0.84994	0.998831	13251	1	-0.36765
FBgn0028868	6	0.034816	0.10247	0.993157	1510	3	-0.60953	0.37697	0.54902	0.993966	8316	2	-0.60953
FBgn0250869	6	0.034872	0.10262	0.993157	1511	3	-0.21904	0.51363	0.65913	0.993966	9909	1	-0.21904
FBgn0265954	4	0.034881	0.086299	0.993157	1512	1	0.14242	0.22056	0.34424	0.992402	5955	1	0.14242
FBgn0033774	6	0.034888	0.10266	0.993157	1513	3	-0.20226	0.068117	0.17943	0.986319	2639	2	-0.20226
FBgn0029834	6	0.034898	0.10268	0.993157	1514	4	-0.50598	0.90779	0.90746	0.999406	14160	0	-0.50598
FBgn0260942	9	0.034906	0.12053	0.993157	1515	2	-0.089638	0.068547	0.20131	0.986319	2658	4	-0.089638
FBgn0038282	5	0.034974	0.099567	0.993157	1516	2	-0.59842	0.97803	0.97813	0.999406	15283	0	-0.59842
FBgn0032847	4	0.03502	0.086575	0.993157	1517	1	0.010452	0.28534	0.41685	0.993966	7086	2	0.010452
FBgn0054040	6	0.035036	0.103	0.993157	1518	2	-0.019072	0.89525	0.89507	0.999406	13984	0	-0.019072
FBgn0034263	6	0.035036	0.103	0.993157	1519	2	-0.023418	0.13879	0.28903	0.989381	4337	2	-0.023418
FBgn0029681	6	0.035036	0.103	0.993157	1520	2	0.30798	0.0049299	0.020317	0.986319	280	3	0.30798
FBgn0039739	6	0.035036	0.103	0.993157	1521	2	0.29971	0.13651	0.28584	0.989381	4271	3	0.29971
FBgn0011589	6	0.035061	0.10307	0.993157	1522	2	0.16545	0.021275	0.069935	0.986319	996	3	0.16545
FBgn0031129	6	0.035061	0.10307	0.993157	1523	3	-0.36109	0.30936	0.49689	0.993966	7390	2	-0.36109
FBgn0267428	6	0.035068	0.10309	0.993157	1524	4	-0.60683	0.97446	0.9745	0.999406	15222	0	-0.60683
FBgn0035299	6	0.035134	0.10324	0.993157	1525	4	-0.32205	0.94868	0.94854	0.999406	14812	0	-0.32205
FBgn0038448	6	0.035221	0.10344	0.993157	1526	4	-0.33677	0.39319	0.56177	0.993966	8492	2	-0.33677
FBgn0259918	6	0.035234	0.10347	0.993157	1527	3	-0.25829	0.21646	0.39578	0.993966	5876	2	-0.25829
FBgn0029824	4	0.035296	0.087195	0.993157	1528	2	-0.20045	0.064259	0.14654	0.986319	2520	1	-0.20045
FBgn0004363	8	0.035329	0.11599	0.993157	1529	5	-0.51292	0.11985	0.28723	0.989381	3932	1	-0.51292
FBgn0034330	6	0.035356	0.10378	0.993157	1530	4	-0.78921	0.90579	0.90551	0.999406	14136	0	-0.78921
FBgn0040900	6	0.035428	0.10394	0.993157	1531	4	-0.28078	0.87321	0.87429	0.998831	13686	1	-0.28078
FBgn0267733	4	0.035479	0.087608	0.993157	1532	3	-1.0911	0.89394	0.89347	0.999406	13965	0	-1.0911
FBgn0267927	4	0.035479	0.087608	0.993157	1533	3	-0.50356	0.74687	0.74728	0.99601	12232	1	-0.50356
FBgn0005632	4	0.035479	0.087608	0.993157	1534	3	-0.83564	0.15116	0.26564	0.989381	4589	1	-0.83564
FBgn0264700	4	0.035479	0.087608	0.993157	1535	3	-0.84727	0.9888	0.98883	0.999406	15447	0	-0.84727
FBgn0267604	4	0.035479	0.087608	0.993157	1536	3	-0.75238	0.91446	0.91417	0.999406	14268	0	-0.75238
FBgn0030369	6	0.03552	0.10417	0.993157	1537	3	-0.54636	0.84773	0.85358	0.998831	13321	1	-0.54636
FBgn0017448	4	0.035529	0.087704	0.993157	1538	2	-0.087298	0.67829	0.68908	0.993966	11590	1	-0.087298
FBgn0086674	6	0.035552	0.10425	0.993157	1539	4	-0.46396	0.99338	0.99339	0.999537	15527	0	-0.46396
FBgn0031397	6	0.035561	0.10428	0.993157	1540	3	-0.10807	0.3529	0.53025	0.993966	8010	2	-0.10807
FBgn0030720	6	0.035649	0.1045	0.993157	1541	2	-0.081715	0.29473	0.48586	0.993966	7210	2	-0.081715
FBgn0264427	6	0.035708	0.10466	0.993157	1542	4	-0.37995	0.59186	0.7261	0.99601	10838	2	-0.37995
FBgn0061196	5	0.035711	0.10098	0.993157	1543	3	-0.33513	0.4004	0.54703	0.993966	8578	1	-0.33513
FBgn0003975	6	0.035718	0.10469	0.993157	1544	2	0.087224	0.18815	0.35756	0.993966	5352	3	0.087224
FBgn0037974	6	0.035764	0.10479	0.993157	1545	4	-0.4979	0.85589	0.85984	0.998831	13428	1	-0.4979
FBgn0053702	6	0.035764	0.10479	0.993157	1546	4	-0.60557	0.76593	0.80203	0.998831	12410	1	-0.60557
FBgn0265608	6	0.035764	0.10479	0.993157	1547	4	-0.47324	0.1198	0.26204	0.989381	3931	2	-0.47324
FBgn0260857	6	0.035764	0.10479	0.993157	1548	4	-0.24983	0.99213	0.99216	0.999406	15511	0	-0.24983
FBgn0033614	6	0.035764	0.10479	0.993157	1549	2	-0.18354	0.99305	0.99307	0.999537	15523	0	-0.18354
FBgn0037501	6	0.035788	0.10484	0.993157	1550	3	-0.1372	0.12711	0.27253	0.989381	4084	2	-0.1372
FBgn0015001	6	0.035788	0.10484	0.993157	1551	3	-0.27416	0.27063	0.46712	0.993966	6868	2	-0.27416
FBgn0261794	11	0.035814	0.12986	0.993157	1552	4	0.0015317	0.20965	0.45924	0.993966	5744	3	0.0015317
FBgn0040089	6	0.035855	0.10501	0.993157	1553	3	-0.49078	0.97999	0.98002	0.999406	15308	0	-0.49078
FBgn0034791	5	0.035884	0.10131	0.993157	1554	3	-0.49707	0.92872	0.92892	0.999406	14490	0	-0.49707
FBgn0052227	6	0.035926	0.10517	0.993157	1555	2	-0.14785	0.60872	0.7354	0.99601	11010	1	-0.14785
FBgn0266833	4	0.036031	0.088772	0.993157	1556	2	-0.054593	0.73347	0.73503	0.99601	12111	1	-0.054593
FBgn0264542	7	0.036033	0.11351	0.993157	1557	2	-0.22103	0.40208	0.60397	0.993966	8596	2	-0.22103
FBgn0085241	2	0.036038	0.065231	0.991081	1558	1	-0.47952	0.5794	0.57918	0.993966	10701	0	-0.47952
FBgn0040697	6	0.036052	0.10547	0.993157	1559	4	-0.32483	0.93965	0.93956	0.999406	14643	0	-0.32483
FBgn0025800	6	0.036099	0.10559	0.993157	1560	3	-0.21673	0.8561	0.86002	0.998831	13431	1	-0.21673
FBgn0265851	4	0.036194	0.089107	0.993157	1561	2	-0.55075	0.59332	0.62919	0.993966	10854	1	-0.55075
FBgn0034418	4	0.036223	0.089175	0.993157	1562	2	-0.60412	0.11524	0.22489	0.98878	3827	1	-0.60412
FBgn0030161	6	0.03624	0.10591	0.993157	1563	2	-0.54411	0.90946	0.90915	0.999406	14183	0	-0.54411
FBgn0034204	6	0.03624	0.10591	0.993157	1564	2	-0.49265	0.43765	0.59724	0.993966	9010	2	-0.49265
FBgn0033817	6	0.0363	0.10605	0.993157	1565	4	-0.41618	0.18651	0.35533	0.992633	5320	1	-0.41618
FBgn0029867	6	0.0363	0.10605	0.993157	1566	4	-0.49896	0.78282	0.8112	0.998831	12576	1	-0.49896
FBgn0037239	8	0.036302	0.11856	0.993157	1567	3	-0.53555	0.63339	0.77506	0.996486	11209	1	-0.53555
FBgn0267425	4	0.036315	0.089377	0.993157	1568	1	-0.045497	0.17419	0.2918	0.989381	5059	1	-0.045497
FBgn0039114	6	0.036341	0.10615	0.993157	1569	2	-0.050786	0.017942	0.061434	0.986319	866	1	-0.050786
FBgn0010355	6	0.036362	0.10619	0.993157	1570	4	-0.50378	0.081883	0.20626	0.986319	3067	1	-0.50378
FBgn0030562	6	0.036362	0.10619	0.993157	1571	3	-0.12902	0.84043	0.84823	0.998831	13227	1	-0.12902
FBgn0027599	4	0.036377	0.089501	0.993157	1572	2	-0.4859	0.66076	0.67587	0.993966	11437	1	-0.4859
FBgn0016076	8	0.036481	0.11906	0.993157	1573	3	-0.30616	0.82395	0.87943	0.998915	13022	1	-0.30616
FBgn0054005	6	0.036554	0.10666	0.993157	1574	4	-0.27054	0.31532	0.50134	0.993966	7468	2	-0.27054
FBgn0003410	6	0.036554	0.10666	0.993157	1575	4	-0.29624	0.97718	0.97726	0.999406	15262	0	-0.29624
FBgn0259227	5	0.036594	0.10259	0.993157	1576	2	-0.083942	0.83953	0.83992	0.998831	13209	1	-0.083942
FBgn0022338	4	0.036616	0.09001	0.993157	1577	1	-0.14728	0.93126	0.93088	0.999406	14520	0	-0.14728
FBgn0026207	6	0.036617	0.1068	0.993157	1578	3	-0.12763	0.04179	0.11972	0.986319	1728	2	-0.12763
FBgn0037707	6	0.036652	0.10689	0.993157	1579	3	-0.39313	0.7501	0.79386	0.997841	12267	1	-0.39313
FBgn0030500	6	0.036671	0.10694	0.993157	1580	4	-0.492	0.92059	0.92027	0.999406	14355	0	-0.492
FBgn0051323	6	0.036733	0.1071	0.993157	1581	3	-0.30273	0.48744	0.63751	0.993966	9603	1	-0.30273
FBgn0052702	6	0.036825	0.10732	0.993157	1582	2	0.13302	0.053056	0.1457	0.986319	2144	2	0.13302
FBgn0011020	3	0.036849	0.082841	0.993157	1583	2	-0.42376	0.95634	0.95666	0.999406	14931	0	-0.42376
FBgn0262894	6	0.036861	0.10739	0.993157	1584	3	-0.28031	0.75236	0.79502	0.997841	12293	1	-0.28031
FBgn0034253	6	0.036956	0.10763	0.993157	1585	4	-0.31689	0.45701	0.61271	0.993966	9239	1	-0.31689
FBgn0028342	2	0.036996	0.066901	0.991081	1586	2	-0.78379	0.963	0.96299	0.999406	15042	0	-0.78379
FBgn0016675	5	0.037034	0.1034	0.993157	1587	2	-0.79174	0.95071	0.95083	0.999406	14844	0	-0.79174
FBgn0033785	6	0.037046	0.10783	0.993157	1588	4	-0.20294	0.75273	0.79519	0.997841	12298	1	-0.20294
FBgn0032751	6	0.037138	0.10804	0.993157	1589	2	0.36692	0.022506	0.073045	0.986319	1044	3	0.36692
FBgn0044028	6	0.037173	0.10812	0.993157	1590	4	-0.63364	0.39561	0.56373	0.993966	8519	2	-0.63364
FBgn0039529	6	0.037173	0.10812	0.993157	1591	4	-0.43473	0.5647	0.70245	0.994513	10541	1	-0.43473
FBgn0265312	4	0.037208	0.091234	0.993157	1592	3	-0.35061	0.9127	0.91245	0.999406	14245	0	-0.35061
FBgn0267447	4	0.037222	0.091254	0.993157	1593	2	-0.68978	0.91509	0.91481	0.999406	14276	0	-0.68978
FBgn0020372	4	0.037222	0.091254	0.993157	1594	2	-0.071046	0.023495	0.062572	0.986319	1080	2	-0.071046
FBgn0267457	4	0.037222	0.091254	0.993157	1595	2	-0.3988	0.2715	0.40139	0.993966	6889	1	-0.3988
FBgn0033527	6	0.037222	0.10823	0.993157	1596	2	0.21818	0.17197	0.33528	0.990735	5026	2	0.21818
FBgn0036153	6	0.037222	0.10823	0.993157	1597	2	-0.33836	0.98398	0.98403	0.999406	15364	0	-0.33836
FBgn0001269	6	0.037239	0.10827	0.993157	1598	1	-0.10661	0.969	0.9691	0.999406	15144	0	-0.10661
FBgn0028996	6	0.037308	0.10843	0.993157	1599	3	-0.49249	0.56884	0.70603	0.994741	10591	1	-0.49249
FBgn0030740	6	0.037372	0.10857	0.993157	1600	3	-0.34262	0.054091	0.14807	0.986319	2172	2	-0.34262
FBgn0053302	6	0.037372	0.10857	0.993157	1601	3	-0.35839	0.59365	0.72768	0.99601	10858	2	-0.35839
FBgn0035231	6	0.037376	0.10858	0.993157	1602	4	-0.53913	0.09715	0.229	0.98878	3437	1	-0.53913
FBgn0016034	6	0.037376	0.10858	0.993157	1603	4	-0.89192	0.87787	0.8784	0.998831	13751	1	-0.89192
FBgn0029809	6	0.037376	0.10858	0.993157	1604	4	-0.58765	0.99325	0.99327	0.999537	15524	0	-0.58765
FBgn0027621	6	0.037378	0.10859	0.993157	1605	1	0.28997	0.56001	0.69845	0.993966	10490	2	0.28997
FBgn0035743	6	0.037391	0.10861	0.993157	1606	3	-0.84209	0.99178	0.99182	0.999406	15497	0	-0.84209
FBgn0029860	4	0.037422	0.09168	0.993157	1607	2	-0.52381	0.8361	0.83556	0.998831	13170	0	-0.52381
FBgn0031881	5	0.037426	0.10411	0.993157	1608	2	-0.29686	0.49035	0.63398	0.993966	9633	1	-0.29686
FBgn0266907	4	0.037444	0.091728	0.993157	1609	3	-0.47201	0.053447	0.12486	0.986319	2154	1	-0.47201
FBgn0035907	4	0.037444	0.091728	0.993157	1610	3	-0.44023	0.93583	0.93553	0.999406	14591	0	-0.44023
FBgn0261514	6	0.037537	0.10898	0.993157	1611	2	0.15888	0.052496	0.14439	0.986319	2119	3	0.15888
FBgn0027287	8	0.037547	0.12183	0.993157	1612	4	-0.33982	0.69711	0.81567	0.998831	11765	1	-0.33982
FBgn0036139	5	0.037628	0.10449	0.993157	1613	3	-0.29158	0.97751	0.9776	0.999406	15272	0	-0.29158
FBgn0052463	6	0.037737	0.10947	0.993157	1614	2	-0.45778	0.92582	0.92566	0.999406	14445	0	-0.45778
FBgn0037442	6	0.037737	0.10947	0.993157	1615	2	-0.5124	0.93542	0.9353	0.999406	14587	0	-0.5124
FBgn0001123	6	0.037737	0.10947	0.993157	1616	2	-0.12439	0.4043	0.57063	0.993966	8631	1	-0.12439
FBgn0065101	3	0.037844	0.084272	0.993157	1617	2	-0.53845	0.45445	0.48913	0.993966	9200	1	-0.53845
FBgn0037477	2	0.037847	0.068354	0.991081	1618	2	-0.96221	0.96215	0.96213	0.999406	15026	0	-0.96221
FBgn0053783	6	0.037921	0.10993	0.993157	1619	4	-0.48464	0.45057	0.60753	0.993966	9148	1	-0.48464
FBgn0085486	6	0.037945	0.10999	0.993157	1620	2	-0.30127	0.34158	0.52158	0.993966	7832	2	-0.30127
FBgn0037231	2	0.037974	0.068581	0.991081	1621	1	-0.092952	0.40433	0.41067	0.993966	8637	1	-0.092952
FBgn0265906	4	0.038002	0.092873	0.993157	1622	1	0.13141	0.55727	0.60656	0.993966	10453	1	0.13141
FBgn0261267	6	0.0381	0.11035	0.993157	1623	2	-0.42852	0.93187	0.93171	0.999406	14527	0	-0.42852
FBgn0031703	6	0.038103	0.11036	0.993157	1624	1	0.049423	0.51152	0.65735	0.993966	9879	2	0.049423
FBgn0264956	4	0.038106	0.093122	0.993157	1625	3	-0.34181	0.86581	0.86541	0.998831	13581	0	-0.34181
FBgn0039415	6	0.038126	0.11042	0.993157	1626	3	-0.25552	0.93048	0.93032	0.999406	14514	0	-0.25552
FBgn0265803	4	0.038148	0.093207	0.993157	1627	3	-0.40365	0.82433	0.82382	0.998831	13024	0	-0.40365
FBgn0010412	4	0.038163	0.093237	0.993157	1628	1	-0.57007	0.96185	0.96164	0.999406	15021	0	-0.57007
FBgn0261858	6	0.038169	0.11051	0.993157	1629	3	-0.25227	0.2956	0.48653	0.993966	7220	2	-0.25227
FBgn0004394	9	0.038218	0.12872	0.993157	1630	5	-0.37936	0.93805	0.9438	0.999406	14620	1	-0.37936
FBgn0261816	6	0.03827	0.11074	0.993157	1631	3	-0.63609	0.73847	0.78811	0.99772	12151	1	-0.63609
FBgn0043530	4	0.038277	0.093484	0.993157	1632	3	-0.47919	0.71889	0.72216	0.99601	11976	1	-0.47919
FBgn0265636	4	0.038314	0.09356	0.993157	1633	3	-0.79894	0.78953	0.789	0.997775	12642	0	-0.79894
FBgn0053673	6	0.038413	0.11107	0.993157	1634	2	-0.0663	0.12452	0.26876	0.989381	4038	2	-0.0663
FBgn0266216	4	0.03844	0.093836	0.993157	1635	2	-0.23853	0.57205	0.6156	0.993966	10625	1	-0.23853
FBgn0031130	6	0.038445	0.11114	0.993157	1636	4	-0.42584	0.81228	0.829	0.998831	12882	1	-0.42584
FBgn0038717	6	0.038476	0.11122	0.993157	1637	4	-0.31755	0.88871	0.88855	0.999406	13897	1	-0.31755
FBgn0262610	6	0.038476	0.11122	0.993157	1638	4	-0.49288	0.49717	0.64554	0.993966	9706	1	-0.49288
FBgn0053116	6	0.038495	0.11125	0.993157	1639	2	0.11821	0.19021	0.36041	0.993966	5382	3	0.11821
FBgn0053290	6	0.038495	0.11125	0.993157	1640	3	-0.42098	0.97766	0.97775	0.999406	15273	0	-0.42098
FBgn0038981	6	0.038511	0.11129	0.993157	1641	3	-0.28112	0.92637	0.92619	0.999406	14453	0	-0.28112
FBgn0036868	5	0.038563	0.10623	0.993157	1642	2	-0.76592	0.78785	0.79448	0.997841	12613	1	-0.76592
FBgn0011272	5	0.038563	0.10623	0.993157	1643	2	-0.096661	0.84944	0.84977	0.998831	13338	0	-0.096661
FBgn0085218	6	0.038598	0.11149	0.993157	1644	3	-0.27554	0.11871	0.26051	0.989381	3905	1	-0.27554
FBgn0038783	6	0.038654	0.11163	0.993157	1645	4	-0.49534	0.8624	0.86515	0.998831	13536	1	-0.49534
FBgn0037503	6	0.038655	0.11164	0.993157	1646	3	-0.17491	0.041653	0.1194	0.986319	1722	2	-0.17491
FBgn0039234	6	0.038758	0.1119	0.993157	1647	2	0.12577	0.37924	0.5508	0.993966	8339	2	0.12577
FBgn0262475	13	0.038796	0.14678	0.993157	1648	6	-0.41996	0.41418	0.69254	0.993966	8760	3	-0.41996
FBgn0038948	6	0.038817	0.11204	0.993157	1649	4	-0.37485	0.95104	0.95092	0.999406	14854	0	-0.37485
FBgn0038595	6	0.038817	0.11204	0.993157	1650	4	-0.36205	0.91186	0.91158	0.999406	14237	0	-0.36205
FBgn0037788	6	0.038896	0.11224	0.993157	1651	3	-0.1662	0.8686	0.87038	0.998831	13619	1	-0.1662
FBgn0039651	6	0.038962	0.11239	0.993157	1652	2	-0.025289	0.5195	0.66397	0.993966	9980	1	-0.025289
FBgn0028856	6	0.038962	0.11239	0.993157	1653	2	-0.47665	0.90651	0.90621	0.999406	14144	0	-0.47665
FBgn0050440	5	0.038962	0.10699	0.993157	1654	3	-0.27176	0.079334	0.18074	0.986319	3000	1	-0.27176
FBgn0033846	6	0.038965	0.1124	0.993157	1655	3	-0.35339	0.45379	0.61013	0.993966	9193	2	-0.35339
FBgn0036334	6	0.039021	0.11253	0.993157	1656	3	-0.30079	0.18469	0.35291	0.992402	5277	2	-0.30079
FBgn0039936	5	0.039039	0.10713	0.993157	1657	3	-0.40322	0.50365	0.63932	0.993966	9781	1	-0.40322
FBgn0085460	6	0.039069	0.11265	0.993157	1658	2	-0.016892	0.39456	0.5629	0.993966	8509	2	-0.016892
FBgn0264432	2	0.039092	0.07061	0.993157	1659	2	-0.83087	0.96091	0.96089	0.999406	15009	0	-0.83087
FBgn0003517	4	0.039115	0.095249	0.993157	1660	2	-0.32523	0.63555	0.65763	0.993966	11236	1	-0.32523
FBgn0040965	4	0.039133	0.095282	0.993157	1661	2	-0.11492	0.83319	0.8327	0.998831	13125	0	-0.11492
FBgn0020503	10	0.039167	0.13764	0.993157	1662	4	-0.23204	0.65165	0.82548	0.998831	11361	2	-0.23204
FBgn0039329	6	0.039172	0.11286	0.993157	1663	1	-0.29849	0.3455	0.52457	0.993966	7891	1	-0.29849
FBgn0015582	6	0.039181	0.11289	0.993157	1664	4	-0.32662	0.92637	0.92619	0.999406	14454	0	-0.32662
FBgn0010591	4	0.039237	0.09549	0.993157	1665	3	-0.42076	0.60337	0.63571	0.993966	10974	1	-0.42076
FBgn0052670	4	0.039237	0.09549	0.993157	1666	3	-0.39592	0.76863	0.76804	0.996486	12433	1	-0.39592
FBgn0087012	6	0.03927	0.11311	0.993157	1667	4	-0.37312	0.91683	0.9165	0.999406	14309	0	-0.37312
FBgn0267646	4	0.039294	0.095611	0.993157	1668	1	0.40498	0.026597	0.069246	0.986319	1204	3	0.40498
FBgn0040502	6	0.039379	0.11337	0.993157	1669	2	-0.052371	0.48826	0.63813	0.993966	9615	2	-0.052371
FBgn0035425	5	0.039447	0.1079	0.993157	1670	2	-0.22966	0.7566	0.77117	0.996486	12328	1	-0.22966
FBgn0036833	6	0.039461	0.11358	0.993157	1671	4	-0.30636	0.23092	0.41502	0.993966	6173	2	-0.30636
FBgn0052302	6	0.039461	0.11358	0.993157	1672	4	-0.3464	0.45033	0.60733	0.993966	9147	1	-0.3464
FBgn0035539	6	0.039461	0.11358	0.993157	1673	4	-0.40295	0.36954	0.54313	0.993966	8230	2	-0.40295
FBgn0067779	6	0.039552	0.11379	0.993157	1674	1	-0.55583	0.088768	0.21655	0.986319	3248	1	-0.55583
FBgn0266428	4	0.039566	0.096176	0.993157	1675	3	-0.40515	0.66744	0.68085	0.993966	11491	1	-0.40515
FBgn0030994	6	0.039655	0.11404	0.993157	1676	2	-0.025148	0.085336	0.21139	0.986319	3159	3	-0.025148
FBgn0032031	6	0.039675	0.11409	0.993157	1677	4	-0.34938	0.93524	0.93512	0.999406	14583	0	-0.34938
FBgn0031802	6	0.039685	0.11411	0.993157	1678	4	-0.21373	0.7751	0.80692	0.998831	12498	1	-0.21373
FBgn0039530	5	0.039778	0.10852	0.993157	1679	3	-0.38039	0.15908	0.31169	0.989381	4762	2	-0.38039
FBgn0013753	4	0.039802	0.096664	0.993157	1680	2	-0.16942	0.39452	0.5192	0.993966	8507	1	-0.16942
FBgn0024314	4	0.039869	0.096824	0.993157	1681	3	-0.58264	0.94726	0.94707	0.999406	14781	0	-0.58264
FBgn0016984	4	0.039869	0.096824	0.993157	1682	3	-0.37535	0.73347	0.73503	0.99601	12109	1	-0.37535
FBgn0265341	4	0.039869	0.096824	0.993157	1683	3	-0.54595	0.048625	0.11501	0.986319	1964	1	-0.54595
FBgn0050471	6	0.039982	0.11478	0.993157	1684	2	-0.083535	0.44049	0.59948	0.993966	9044	2	-0.083535
FBgn0004622	6	0.039982	0.11478	0.993157	1685	2	0.10657	0.074486	0.19323	0.986319	2861	2	0.10657
FBgn0260869	6	0.039982	0.11478	0.993157	1686	2	-0.090218	0.40386	0.57027	0.993966	8622	2	-0.090218
FBgn0036577	6	0.039982	0.11478	0.993157	1687	4	-0.46702	0.68851	0.76583	0.996486	11688	1	-0.46702
FBgn0033234	8	0.039999	0.12825	0.993157	1688	3	-0.071756	0.46787	0.68106	0.993966	9367	2	-0.071756
FBgn0038880	6	0.040034	0.11489	0.993157	1689	3	-0.16841	0.0023154	0.01027	0.986319	146	2	-0.16841
FBgn0052703	6	0.04004	0.11491	0.993157	1690	4	-0.67916	0.63712	0.74563	0.99601	11256	1	-0.67916
FBgn0003888	6	0.04004	0.11491	0.993157	1691	4	-0.4852	0.96879	0.96889	0.999406	15137	0	-0.4852
FBgn0038640	6	0.04004	0.11491	0.993157	1692	4	-0.5733	0.0036669	0.015584	0.986319	224	2	-0.5733
FBgn0038719	6	0.04004	0.11491	0.993157	1693	4	-0.63603	0.49398	0.64289	0.993966	9671	1	-0.63603
FBgn0038931	6	0.04004	0.11491	0.993157	1694	4	-0.33536	0.25949	0.45269	0.993966	6661	2	-0.33536
FBgn0262821	6	0.04004	0.11491	0.993157	1695	4	-0.51077	0.9135	0.91322	0.999406	14261	0	-0.51077
FBgn0026756	6	0.04004	0.11491	0.993157	1696	4	-0.53426	0.81637	0.83159	0.998831	12942	1	-0.53426
FBgn0030929	2	0.040048	0.072276	0.993157	1697	1	-0.048706	0.13505	0.19197	0.986319	4244	1	-0.048706
FBgn0051739	6	0.040053	0.11494	0.993157	1698	3	-0.70536	0.37751	0.54946	0.993966	8321	1	-0.70536
FBgn0263608	6	0.040053	0.11494	0.993157	1699	3	-0.69974	0.97294	0.973	0.999406	15208	0	-0.69974
FBgn0266801	6	0.040053	0.11494	0.993157	1700	3	-0.24625	0.31217	0.49903	0.993966	7432	2	-0.24625
FBgn0040996	6	0.040053	0.11494	0.993157	1701	3	-0.16278	0.1781	0.34383	0.992402	5136	2	-0.16278
FBgn0038893	6	0.040053	0.11494	0.993157	1702	3	-0.84924	0.19611	0.36841	0.993966	5494	2	-0.84924
FBgn0032513	4	0.040132	0.097396	0.993157	1703	3	-0.36678	0.15978	0.27549	0.989381	4774	1	-0.36678
FBgn0033465	6	0.040138	0.11512	0.993157	1704	2	-0.16854	0.81431	0.83028	0.998831	12910	1	-0.16854
FBgn0261446	6	0.040241	0.11536	0.993157	1705	1	0.013998	0.36416	0.53907	0.993966	8158	2	0.013998
FBgn0032083	6	0.040241	0.11536	0.993157	1706	2	-0.24445	0.020748	0.068593	0.986319	978	1	-0.24445
FBgn0035346	8	0.040254	0.12886	0.993157	1707	4	-0.32147	0.53434	0.71771	0.99601	10174	2	-0.32147
FBgn0262009	4	0.040328	0.097789	0.993157	1708	2	-0.73469	0.98505	0.98504	0.999406	15379	0	-0.73469
FBgn0259229	6	0.040351	0.11563	0.993157	1709	4	-0.32968	0.050122	0.13897	0.986319	2017	1	-0.32968
FBgn0004956	6	0.040354	0.11563	0.993157	1710	3	-0.1159	0.881	0.88128	0.998991	13795	1	-0.1159
FBgn0265930	4	0.040356	0.097849	0.993157	1711	3	-0.63821	0.96605	0.96585	0.999406	15096	0	-0.63821
FBgn0051286	6	0.040413	0.11576	0.993157	1712	2	-0.66401	0.98595	0.986	0.999406	15400	0	-0.66401
FBgn0033918	4	0.04052	0.09817	0.993157	1713	2	-0.3656	0.51901	0.58408	0.993966	9975	1	-0.3656
FBgn0051682	6	0.040551	0.11611	0.993157	1714	2	-0.052076	0.51273	0.65839	0.993966	9894	1	-0.052076
FBgn0038820	5	0.040563	0.11001	0.993157	1715	2	-0.033032	0.36857	0.51663	0.993966	8219	2	-0.033032
FBgn0039507	8	0.040615	0.12982	0.993157	1716	4	-0.22873	0.94104	0.94152	0.999406	14674	1	-0.22873
FBgn0034740	6	0.04067	0.11638	0.993157	1717	3	-0.56452	0.44816	0.60557	0.993966	9122	1	-0.56452
FBgn0032730	6	0.040674	0.11639	0.993157	1718	4	-0.42773	0.68244	0.76331	0.996486	11630	1	-0.42773
FBgn0030742	6	0.040689	0.11643	0.993157	1719	1	-0.077071	0.16214	0.32168	0.989381	4826	1	-0.077071
FBgn0259847	2	0.040701	0.07341	0.993157	1720	2	-1.2368	0.9593	0.95925	0.999406	14980	0	-1.2368
FBgn0052626	10	0.040713	0.14209	0.993157	1721	5	-0.5816	0.74992	0.86746	0.998831	12263	2	-0.5816
FBgn0045486	6	0.04077	0.11663	0.993157	1722	3	-0.55721	0.0026712	0.011714	0.986319	163	2	-0.55721
FBgn0026777	6	0.040783	0.11665	0.993157	1723	3	-0.17755	0.22566	0.40799	0.993966	6068	3	-0.17755
FBgn0085487	6	0.040783	0.11665	0.993157	1724	2	-0.15441	0.046049	0.12969	0.986319	1877	1	-0.15441
FBgn0046225	6	0.040786	0.11666	0.993157	1725	4	-0.26549	0.95479	0.95475	0.999406	14909	0	-0.26549
FBgn0030245	6	0.040942	0.11706	0.993157	1726	2	-0.061887	0.07075	0.18517	0.986319	2745	2	-0.061887
FBgn0266369	6	0.040942	0.11706	0.993157	1727	3	-0.32905	0.90003	0.89981	0.999406	14061	0	-0.32905
FBgn0036892	6	0.040968	0.11712	0.993157	1728	4	-0.36001	0.92559	0.92542	0.999406	14442	0	-0.36001
FBgn0038723	4	0.040972	0.09911	0.993157	1729	2	-0.34336	0.15387	0.26878	0.989381	4638	2	-0.34336
FBgn0265804	4	0.041023	0.099217	0.993157	1730	1	0.089637	0.69399	0.70149	0.994391	11732	1	0.089637
FBgn0038535	10	0.041062	0.14305	0.993157	1731	5	-0.14182	0.392	0.6442	0.993966	8476	3	-0.14182
FBgn0052250	6	0.041102	0.11744	0.993157	1732	1	-0.13859	0.69297	0.76767	0.996486	11724	1	-0.13859
FBgn0032450	4	0.041115	0.099411	0.993157	1733	2	0.13152	0.19251	0.31261	0.989381	5434	2	0.13152
FBgn0037536	6	0.041131	0.11751	0.993157	1734	4	-0.46648	0.41929	0.58247	0.993966	8803	1	-0.46648
FBgn0032105	6	0.041131	0.11751	0.993157	1735	4	-0.32837	0.45977	0.615	0.993966	9269	1	-0.32837
FBgn0051848	6	0.041205	0.1177	0.993157	1736	3	-0.13755	0.20133	0.3756	0.993966	5594	3	-0.13755
FBgn0046875	6	0.041274	0.11787	0.993157	1737	2	-0.14696	0.090285	0.21879	0.986319	3292	1	-0.14696
FBgn0001090	6	0.041274	0.11787	0.993157	1738	1	0.22039	0.25826	0.45112	0.993966	6646	3	0.22039
FBgn0267813	4	0.041276	0.099741	0.993157	1739	1	-0.094394	0.59436	0.62985	0.993966	10867	1	-0.094394
FBgn0036568	6	0.041301	0.11793	0.993157	1740	4	-0.20972	0.32299	0.50721	0.993966	7572	2	-0.20972
FBgn0261587	5	0.041307	0.1114	0.993157	1741	2	-0.16804	0.22458	0.38172	0.993966	6030	2	-0.16804
FBgn0086362	6	0.041334	0.118	0.993157	1742	4	-0.27316	0.71567	0.77749	0.996486	11952	1	-0.27316
FBgn0032519	6	0.041446	0.11827	0.993157	1743	1	0.023073	0.45863	0.61404	0.993966	9257	2	0.023073
FBgn0052117	6	0.041446	0.11827	0.993157	1744	2	-0.28358	0.30664	0.49483	0.993966	7350	2	-0.28358
FBgn0266965	4	0.041457	0.10011	0.993157	1745	2	-0.39473	0.69159	0.69956	0.993966	11714	1	-0.39473
FBgn0034104	6	0.041509	0.11842	0.993157	1746	2	0.22472	0.081418	0.20556	0.986319	3055	3	0.22472
FBgn0266727	4	0.04153	0.10026	0.993157	1747	1	-0.054501	0.5672	0.61261	0.993966	10577	1	-0.054501
FBgn0259733	2	0.041543	0.074822	0.993157	1748	2	-0.97322	0.95846	0.9584	0.999406	14968	0	-0.97322
FBgn0267320	4	0.041588	0.10038	0.993157	1749	2	0.095887	0.07925	0.17569	0.986319	2995	2	0.095887
FBgn0031357	6	0.041625	0.11871	0.993157	1750	4	-0.35726	0.69011	0.76649	0.996486	11703	1	-0.35726
FBgn0025592	4	0.041645	0.1005	0.993157	1751	2	-0.15015	0.76274	0.76236	0.996486	12382	1	-0.15015
FBgn0035057	6	0.041653	0.11877	0.993157	1752	3	-0.078596	0.5885	0.72312	0.99601	10806	1	-0.078596
FBgn0037842	6	0.041718	0.11891	0.993157	1753	2	-0.038847	0.47121	0.62421	0.993966	9406	2	-0.038847
FBgn0039125	6	0.041718	0.11891	0.993157	1754	2	-0.13388	0.027247	0.084789	0.986319	1223	3	-0.13388
FBgn0085638	6	0.04175	0.119	0.993157	1755	4	-0.50778	0.8821	0.88227	0.998991	13809	1	-0.50778
FBgn0037294	6	0.04175	0.119	0.993157	1756	3	-0.57989	0.31723	0.50278	0.993966	7487	1	-0.57989
FBgn0267186	4	0.04176	0.10073	0.993157	1757	3	-0.76122	0.85683	0.85643	0.998831	13445	0	-0.76122
FBgn0032451	6	0.041903	0.11935	0.993157	1758	3	-0.12961	0.60619	0.73454	0.99601	10994	1	-0.12961
FBgn0031347	6	0.041928	0.11941	0.993157	1759	1	0.15738	0.72458	0.78152	0.996486	12031	1	0.15738
FBgn0036222	6	0.041931	0.11941	0.993157	1760	4	-0.37006	0.80656	0.82533	0.998831	12820	1	-0.37006
FBgn0031392	6	0.041931	0.11941	0.993157	1761	4	-0.80608	0.98159	0.98161	0.999406	15335	0	-0.80608
FBgn0030457	4	0.041987	0.10121	0.993157	1762	2	-0.28942	0.22552	0.34976	0.992402	6057	2	-0.28942
FBgn0051463	6	0.041997	0.11958	0.993157	1763	2	-0.1471	0.44501	0.60298	0.993966	9096	2	-0.1471
FBgn0038590	6	0.042007	0.11961	0.993157	1764	4	-0.40024	0.99831	0.99825	0.999537	15601	0	-0.40024
FBgn0038847	6	0.042049	0.11971	0.993157	1765	3	-0.42826	0.30426	0.49299	0.993966	7321	2	-0.42826
FBgn0053500	6	0.042203	0.12008	0.993157	1766	2	-0.099407	0.15967	0.31829	0.989381	4771	1	-0.099407
FBgn0032964	6	0.042269	0.12023	0.993157	1767	4	-0.53648	0.41992	0.583	0.993966	8812	1	-0.53648
FBgn0030897	6	0.04229	0.12027	0.993157	1768	3	-0.68563	0.99762	0.99758	0.999537	15587	0	-0.68563
FBgn0033204	6	0.042306	0.1203	0.993157	1769	3	-0.23341	0.51855	0.6632	0.993966	9973	2	-0.23341
FBgn0035477	5	0.042377	0.11345	0.993157	1770	2	-0.15707	0.90225	0.9025	0.999406	14094	0	-0.15707
FBgn0039582	6	0.042404	0.12052	0.993157	1771	4	-0.39145	0.45208	0.60873	0.993966	9168	2	-0.39145
FBgn0001227	6	0.042404	0.12052	0.993157	1772	4	-0.35124	0.51306	0.65865	0.993966	9907	1	-0.35124
FBgn0260750	6	0.042404	0.12052	0.993157	1773	4	-0.30028	0.97396	0.97399	0.999406	15219	0	-0.30028
FBgn0267483	4	0.042457	0.10219	0.993157	1774	2	-0.41172	0.54516	0.59925	0.993966	10298	1	-0.41172
FBgn0053002	6	0.04247	0.12068	0.993157	1775	4	-0.39322	0.955	0.95496	0.999406	14913	0	-0.39322
FBgn0266641	4	0.042588	0.10245	0.993157	1776	3	-0.24251	0.97572	0.97561	0.999406	15245	0	-0.24251
FBgn0261647	4	0.042636	0.10255	0.993157	1777	3	-0.48319	0.14053	0.25365	0.989381	4380	1	-0.48319
FBgn0038404	6	0.042637	0.12105	0.993157	1778	3	-0.25315	0.171	0.33389	0.989381	5011	2	-0.25315
FBgn0037473	4	0.042658	0.1026	0.993157	1779	2	-0.48573	0.3522	0.49194	0.993966	8002	1	-0.48573
FBgn0033479	4	0.04268	0.10264	0.993157	1780	1	0.0070097	0.35846	0.49888	0.993966	8100	2	0.0070097
FBgn0266831	4	0.04272	0.10274	0.993157	1781	3	-0.55888	0.71387	0.7179	0.99601	11935	1	-0.55888
FBgn0261573	6	0.042744	0.12131	0.993157	1782	3	-0.41382	0.93816	0.93809	0.999406	14625	0	-0.41382
FBgn0004865	6	0.042744	0.12131	0.993157	1783	3	-0.47329	0.96004	0.96008	0.999406	14996	0	-0.47329
FBgn0262608	6	0.042762	0.12135	0.993157	1784	4	-0.49079	0.69258	0.7675	0.996486	11720	1	-0.49079
FBgn0035690	6	0.042762	0.12135	0.993157	1785	4	-0.42901	0.631	0.74336	0.99601	11188	1	-0.42901
FBgn0037466	6	0.042762	0.12135	0.993157	1786	4	-0.43295	0.089483	0.2176	0.986319	3265	2	-0.43295
FBgn0010812	6	0.04284	0.12157	0.993157	1787	2	-0.029906	0.51469	0.66	0.993966	9919	2	-0.029906
FBgn0261524	6	0.042865	0.12163	0.993157	1788	2	-0.21457	0.5123	0.65803	0.993966	9890	1	-0.21457
FBgn0267540	4	0.04291	0.10314	0.993157	1789	3	-0.29785	0.49083	0.56846	0.993966	9639	1	-0.29785
FBgn0038771	4	0.04295	0.10323	0.993157	1790	2	-0.16221	0.046914	0.11169	0.986319	1906	2	-0.16221
FBgn0052582	4	0.04295	0.10323	0.993157	1791	2	-0.20056	0.10555	0.21385	0.986319	3626	2	-0.20056
FBgn0051015	3	0.042959	0.091866	0.993157	1792	1	0.34113	0.12018	0.20218	0.986319	3940	2	0.34113
FBgn0035430	6	0.04296	0.12185	0.993157	1793	1	-0.12157	0.33641	0.51751	0.993966	7750	1	-0.12157
FBgn0023534	6	0.04296	0.12185	0.993157	1794	2	0.14092	0.4004	0.56749	0.993966	8579	1	0.14092
FBgn0050185	6	0.04306	0.12209	0.993157	1795	2	-0.19482	0.022289	0.072488	0.986319	1031	2	-0.19482
FBgn0265703	4	0.043178	0.1037	0.993157	1796	2	0.1253	0.06385	0.14567	0.986319	2498	2	0.1253
FBgn0262980	6	0.043214	0.12248	0.993157	1797	2	0.058636	0.32299	0.50721	0.993966	7570	2	0.058636
FBgn0029951	6	0.043214	0.12248	0.993157	1798	2	-0.19354	0.54487	0.68555	0.993966	10291	2	-0.19354
FBgn0037933	6	0.043238	0.12253	0.993157	1799	3	-0.2431	0.18636	0.35512	0.992402	5318	1	-0.2431
FBgn0267268	4	0.043264	0.10387	0.993157	1800	3	-0.51788	0.97849	0.97844	0.999406	15285	0	-0.51788
FBgn0030207	4	0.043264	0.10387	0.993157	1801	3	-0.65002	0.98571	0.98571	0.999406	15392	0	-0.65002
FBgn0032176	6	0.043265	0.12259	0.993157	1802	4	-0.25105	0.63915	0.74639	0.99601	11275	1	-0.25105
FBgn0035059	6	0.043351	0.1228	0.993157	1803	4	-0.28549	0.099734	0.23279	0.98878	3492	1	-0.28549
FBgn0267565	4	0.043393	0.10415	0.993157	1804	2	-0.027058	0.062946	0.14385	0.986319	2461	2	-0.027058
FBgn0052237	5	0.043418	0.11536	0.993157	1805	3	-0.42163	0.46432	0.60903	0.993966	9325	1	-0.42163
FBgn0035388	6	0.043479	0.12311	0.993157	1806	4	-0.26058	0.88522	0.8852	0.999406	13850	1	-0.26058
FBgn0024230	6	0.043479	0.12311	0.993157	1807	4	-0.27001	0.28599	0.47928	0.993966	7094	2	-0.27001
FBgn0263019	4	0.043504	0.10439	0.993157	1808	3	-0.74268	0.97849	0.97844	0.999406	15287	0	-0.74268
FBgn0035766	4	0.043504	0.10439	0.993157	1809	2	-0.63441	0.25463	0.38242	0.993966	6585	1	-0.63441
FBgn0267200	4	0.043508	0.1044	0.993157	1810	1	-0.75847	0.96542	0.96522	0.999406	15080	0	-0.75847
FBgn0259234	8	0.04351	0.13758	0.993157	1811	3	-0.053068	0.32851	0.54631	0.993966	7642	2	-0.053068
FBgn0036713	6	0.043565	0.1233	0.993157	1812	2	0.0059026	0.56673	0.70422	0.994741	10566	2	0.0059026
FBgn0032008	6	0.043647	0.12349	0.993157	1813	3	-0.0061429	0.26844	0.46423	0.993966	6832	3	-0.0061429
FBgn0033287	6	0.043672	0.12356	0.993157	1814	3	-0.53665	0.4043	0.57063	0.993966	8630	1	-0.53665
FBgn0051921	6	0.043672	0.12356	0.993157	1815	3	-0.2716	0.26018	0.45357	0.993966	6678	1	-0.2716
FBgn0267431	6	0.043683	0.12359	0.993157	1816	4	-0.26907	0.99585	0.99587	0.999537	15563	0	-0.26907
FBgn0015664	4	0.043723	0.10482	0.993157	1817	2	-0.34706	0.13867	0.25155	0.989381	4334	1	-0.34706
FBgn0016131	9	0.043731	0.14232	0.993157	1818	2	0.063186	0.19812	0.41687	0.993966	5536	4	0.063186
FBgn0019662	6	0.043786	0.12382	0.993157	1819	2	-0.064246	0.1081	0.24495	0.989381	3677	1	-0.064246
FBgn0052588	4	0.04383	0.10505	0.993157	1820	3	-0.40775	0.85121	0.8507	0.998831	13368	0	-0.40775
FBgn0264487	6	0.043846	0.12395	0.993157	1821	4	-0.56538	0.66939	0.75803	0.996486	11506	1	-0.56538
FBgn0025709	6	0.043846	0.12395	0.993157	1822	4	-0.74844	0.75155	0.79461	0.997841	12285	1	-0.74844
FBgn0002989	4	0.043947	0.10528	0.993157	1823	3	-0.35583	0.9347	0.93439	0.999406	14575	0	-0.35583
FBgn0051072	4	0.043947	0.10528	0.993157	1824	3	-0.45342	0.93984	0.93957	0.999406	14648	0	-0.45342
FBgn0052064	6	0.043956	0.12424	0.993157	1825	2	0.0032666	0.13165	0.27892	0.989381	4175	2	0.0032666
FBgn0030796	6	0.043956	0.12424	0.993157	1826	3	-0.24914	0.22737	0.41031	0.993966	6100	2	-0.24914
FBgn0260768	6	0.043972	0.12428	0.993157	1827	3	-0.53231	0.23825	0.4248	0.993966	6285	2	-0.53231
FBgn0259237	6	0.043975	0.12429	0.993157	1828	2	0.14862	0.030069	0.091832	0.986319	1334	3	0.14862
FBgn0037248	6	0.044058	0.12448	0.993157	1829	4	-0.26338	0.34209	0.52195	0.993966	7845	1	-0.26338
FBgn0024975	6	0.044058	0.12448	0.993157	1830	4	-0.3263	0.21881	0.39897	0.993966	5924	1	-0.3263
FBgn0051121	6	0.044058	0.12448	0.993157	1831	4	-0.26379	0.87615	0.87687	0.998831	13727	1	-0.26379
FBgn0036552	6	0.044058	0.12448	0.993157	1832	4	-0.29514	0.74838	0.79301	0.997841	12247	1	-0.29514
FBgn0265890	4	0.044088	0.10555	0.993157	1833	3	-0.45587	0.74167	0.74244	0.99601	12180	1	-0.45587
FBgn0030674	6	0.044128	0.12464	0.993157	1834	1	0.18076	0.23291	0.41769	0.993966	6199	3	0.18076
FBgn0033317	6	0.044155	0.12472	0.993157	1835	2	0.12639	0.32542	0.50913	0.993966	7599	2	0.12639
FBgn0033248	6	0.044155	0.12472	0.993157	1836	2	-0.071448	0.56518	0.70288	0.994513	10548	1	-0.071448
FBgn0037251	4	0.044169	0.10572	0.993157	1837	2	-0.53511	0.085426	0.18727	0.986319	3163	1	-0.53511
FBgn0053640	6	0.044265	0.12497	0.993157	1838	3	-0.29107	0.39291	0.56157	0.993966	8485	1	-0.29107
FBgn0039288	6	0.044266	0.12497	0.993157	1839	3	-0.33923	0.42461	0.5867	0.993966	8869	2	-0.33923
FBgn0050428	6	0.044295	0.12503	0.993157	1840	3	-0.31341	0.91645	0.91611	0.999406	14301	0	-0.31341
FBgn0052774	6	0.044333	0.12511	0.993157	1841	4	-0.40283	0.95957	0.95961	0.999406	14982	0	-0.40283
FBgn0031773	6	0.044333	0.12511	0.993157	1842	4	-0.47795	0.96098	0.96101	0.999406	15010	0	-0.47795
FBgn0028717	6	0.044333	0.12511	0.993157	1843	4	-0.39675	0.060154	0.16174	0.986319	2395	1	-0.39675
FBgn0260005	6	0.044333	0.12511	0.993157	1844	4	-0.40963	0.48114	0.63228	0.993966	9530	2	-0.40963
FBgn0260970	6	0.044342	0.12513	0.993157	1845	3	-0.34141	0.37322	0.54607	0.993966	8272	1	-0.34141
FBgn0262478	6	0.044342	0.12513	0.993157	1846	3	-0.30483	0.22333	0.40488	0.993966	6008	1	-0.30483
FBgn0266388	4	0.044344	0.10607	0.993157	1847	3	-0.67	0.99187	0.99193	0.999406	15507	0	-0.67
FBgn0038371	6	0.044437	0.12535	0.993157	1848	1	0.01001	0.070937	0.18557	0.986319	2755	1	0.01001
FBgn0033136	6	0.044468	0.12542	0.993157	1849	3	-0.14191	0.27965	0.47459	0.993966	7012	2	-0.14191
FBgn0051992	4	0.044575	0.10652	0.993157	1850	3	-0.72462	0.93256	0.93218	0.999406	14541	0	-0.72462
FBgn0035603	5	0.044585	0.11749	0.993157	1851	2	-0.22048	0.89092	0.89123	0.999406	13924	0	-0.22048
FBgn0036911	3	0.044619	0.094281	0.993157	1852	2	-0.51878	0.92454	0.92463	0.999406	14420	0	-0.51878
FBgn0051626	2	0.044619	0.080124	0.993157	1853	1	-0.73393	0.89927	0.89887	0.999406	14053	0	-0.73393
FBgn0035798	6	0.044643	0.12584	0.993157	1854	2	0.16937	0.14764	0.30134	0.989381	4509	3	0.16937
FBgn0027596	16	0.044705	0.17374	0.993157	1855	6	-0.22948	0.57821	0.8336	0.998831	10678	2	-0.22948
FBgn0261552	14	0.044799	0.16731	0.993157	1856	3	0.079379	0.26166	0.55187	0.993966	6703	4	0.079379
FBgn0030494	6	0.044814	0.12625	0.993157	1857	2	-0.0438	0.90835	0.90801	0.999406	14168	0	-0.0438
FBgn0264358	4	0.044818	0.10703	0.993157	1858	2	-0.18912	0.95383	0.95364	0.999406	14897	0	-0.18912
FBgn0037195	6	0.044856	0.12635	0.993157	1859	2	-0.55721	0.65865	0.75378	0.996319	11415	1	-0.55721
FBgn0001235	6	0.044981	0.12663	0.993157	1860	3	-0.081251	0.042217	0.12073	0.986319	1750	2	-0.081251
FBgn0036545	4	0.045044	0.10751	0.993157	1861	2	-0.31359	0.60397	0.63609	0.993966	10977	1	-0.31359
FBgn0038204	6	0.045057	0.12681	0.993157	1862	4	-0.32056	0.98037	0.9804	0.999406	15317	0	-0.32056
FBgn0263270	6	0.045057	0.12681	0.993157	1863	4	-0.40818	0.59136	0.72566	0.99601	10830	2	-0.40818
FBgn0040850	6	0.045057	0.12681	0.993157	1864	4	-0.42022	0.24975	0.43999	0.993966	6500	2	-0.42022
FBgn0003268	6	0.045057	0.12681	0.993157	1865	4	-0.29315	0.78864	0.81452	0.998831	12629	1	-0.29315
FBgn0051044	4	0.045186	0.10778	0.993157	1866	3	-0.32318	0.35083	0.49048	0.993966	7983	1	-0.32318
FBgn0034504	6	0.045192	0.12712	0.993157	1867	4	-0.22673	0.78282	0.8112	0.998831	12577	1	-0.22673
FBgn0263405	4	0.045201	0.10782	0.993157	1868	2	-0.43914	0.95995	0.95975	0.999406	14995	0	-0.43914
FBgn0265500	4	0.045201	0.10782	0.993157	1869	2	-0.18481	0.089465	0.19485	0.986319	3264	1	-0.18481
FBgn0051721	5	0.045274	0.11878	0.993157	1870	3	-0.42163	0.41503	0.56107	0.993966	8765	2	-0.42163
FBgn0039026	2	0.045316	0.081255	0.993157	1871	1	-1.0319	0.049504	0.08827	0.986319	1987	1	-1.0319
FBgn0033259	6	0.045344	0.12749	0.993157	1872	4	-0.38786	0.85953	0.86276	0.998831	13493	1	-0.38786
FBgn0036843	4	0.045392	0.10819	0.993157	1873	2	-0.12079	0.31003	0.44466	0.993966	7401	1	-0.12079
FBgn0037717	5	0.045415	0.11905	0.993157	1874	1	-0.26731	0.15407	0.30389	0.989381	4645	2	-0.26731
FBgn0266347	6	0.045466	0.12776	0.993157	1875	2	-0.025899	0.095397	0.22639	0.98878	3401	2	-0.025899
FBgn0086907	6	0.045466	0.12776	0.993157	1876	2	-0.0084468	0.19071	0.36108	0.993966	5391	3	-0.0084468
FBgn0051156	6	0.045466	0.12776	0.993157	1877	3	-0.36687	0.24234	0.43021	0.993966	6367	2	-0.36687
FBgn0000406	6	0.045536	0.12792	0.993157	1878	4	-0.32081	0.88764	0.88752	0.999406	13875	1	-0.32081
FBgn0033358	6	0.045546	0.12794	0.993157	1879	4	-0.20566	0.30208	0.49135	0.993966	7295	2	-0.20566
FBgn0267722	4	0.045553	0.10852	0.993157	1880	2	-0.2962	0.71133	0.71573	0.99601	11900	1	-0.2962
FBgn0041621	6	0.045667	0.12824	0.993157	1881	4	-0.3417	0.80295	0.82312	0.998831	12777	1	-0.3417
FBgn0053926	6	0.045667	0.12824	0.993157	1882	4	-0.31863	0.0059752	0.024206	0.986319	345	1	-0.31863
FBgn0031529	4	0.045691	0.10879	0.993157	1883	1	-0.19219	0.32407	0.46045	0.993966	7581	1	-0.19219
FBgn0063923	5	0.045704	0.1196	0.993157	1884	3	-0.54159	0.065175	0.15659	0.986319	2547	1	-0.54159
FBgn0085432	8	0.045719	0.14337	0.993157	1885	5	-0.3855	0.9664	0.96663	0.999406	15102	0	-0.3855
FBgn0039265	6	0.045774	0.12849	0.993157	1886	4	-0.2666	0.58617	0.7211	0.99601	10778	2	-0.2666
FBgn0033063	6	0.045774	0.12849	0.993157	1887	4	-0.31565	0.27411	0.47035	0.993966	6933	2	-0.31565
FBgn0053986	6	0.045778	0.1285	0.993157	1888	3	-0.22143	0.45233	0.60893	0.993966	9172	2	-0.22143
FBgn0264429	4	0.045805	0.10904	0.993157	1889	1	-0.28486	0.88665	0.88617	0.999406	13865	0	-0.28486
FBgn0265448	4	0.045862	0.10916	0.993157	1890	3	-0.77044	0.90253	0.90213	0.999406	14098	0	-0.77044
FBgn0039301	4	0.045862	0.10916	0.993157	1891	3	-0.67671	0.68119	0.69135	0.993966	11622	1	-0.67671
FBgn0000077	4	0.045862	0.10916	0.993157	1892	3	-1.1307	0.94581	0.94558	0.999406	14760	0	-1.1307
FBgn0039761	6	0.045878	0.12874	0.993157	1893	4	-0.35384	0.51025	0.6563	0.993966	9866	2	-0.35384
FBgn0266581	6	0.045896	0.12878	0.993157	1894	3	-0.097307	0.53309	0.67539	0.993966	10158	1	-0.097307
FBgn0052304	6	0.045896	0.12878	0.993157	1895	3	-0.0007093	0.026376	0.082671	0.986319	1197	3	-0.0007093
FBgn0034612	6	0.045896	0.12878	0.993157	1896	3	-0.71939	0.33367	0.51542	0.993966	7709	1	-0.71939
FBgn0283525	6	0.045896	0.12878	0.993157	1897	3	-0.28301	0.17565	0.34046	0.992402	5097	1	-0.28301
FBgn0267632	4	0.045966	0.10937	0.993157	1898	2	-0.72802	0.90593	0.90556	0.999406	14138	0	-0.72802
FBgn0030358	6	0.045981	0.129	0.993157	1899	2	-0.1159	0.15181	0.30722	0.989381	4597	1	-0.1159
FBgn0013725	6	0.045982	0.129	0.993157	1900	4	-0.37682	0.99111	0.99111	0.999406	15486	0	-0.37682
FBgn0040737	6	0.046029	0.12911	0.993157	1901	2	-0.22027	0.58472	0.71985	0.99601	10760	1	-0.22027
FBgn0046113	6	0.046078	0.12921	0.993157	1902	4	-0.38273	0.85862	0.86205	0.998831	13474	1	-0.38273
FBgn0267547	4	0.046081	0.10961	0.993157	1903	1	-0.13015	0.83195	0.83144	0.998831	13110	0	-0.13015
FBgn0034959	6	0.046114	0.12928	0.993157	1904	4	-0.25146	0.99562	0.99565	0.999537	15560	0	-0.25146
FBgn0004959	6	0.046118	0.12929	0.993157	1905	2	0.44984	0.069419	0.18233	0.986319	2700	4	0.44984
FBgn0045852	10	0.046138	0.1575	0.993157	1906	3	0.23855	0.031979	0.1171	0.986319	1394	5	0.23855
FBgn0036759	4	0.046183	0.1098	0.993157	1907	2	-0.76443	0.92431	0.92396	0.999406	14414	0	-0.76443
FBgn0034439	6	0.046186	0.12946	0.993157	1908	1	0.15167	0.33085	0.51326	0.993966	7675	2	0.15167
FBgn0005655	6	0.046255	0.12962	0.993157	1909	1	0.10747	0.33686	0.51788	0.993966	7755	1	0.10747
FBgn0035393	6	0.046276	0.12966	0.993157	1910	4	-0.24345	0.63758	0.7458	0.99601	11258	1	-0.24345
FBgn0085200	6	0.046276	0.12966	0.993157	1911	4	-0.5013	0.32933	0.51216	0.993966	7653	1	-0.5013
FBgn0010287	6	0.046303	0.12973	0.993157	1912	3	-0.54488	0.57929	0.71511	0.99601	10694	2	-0.54488
FBgn0051140	6	0.046324	0.12977	0.993157	1913	1	-0.077098	0.93839	0.93831	0.999406	14628	0	-0.077098
FBgn0051788	6	0.046338	0.1298	0.993157	1914	2	-0.099296	0.94053	0.94044	0.999406	14666	0	-0.099296
FBgn0004587	6	0.046392	0.12994	0.993157	1915	2	0.14906	0.20994	0.38707	0.993966	5749	3	0.14906
FBgn0011280	6	0.046395	0.12994	0.993157	1916	4	-0.37087	0.14382	0.29598	0.989381	4431	2	-0.37087
FBgn0014033	6	0.046395	0.12994	0.993157	1917	4	-0.43892	0.33861	0.5193	0.993966	7794	1	-0.43892
FBgn0032168	4	0.046448	0.11032	0.993157	1918	1	0.18292	0.25355	0.38119	0.993966	6569	2	0.18292
FBgn0085290	6	0.046481	0.13013	0.993157	1919	4	-0.31124	0.72004	0.77946	0.996486	11990	1	-0.31124
FBgn0036046	6	0.046565	0.13033	0.993157	1920	2	0.06465	0.25328	0.4446	0.993966	6566	2	0.06465
FBgn0261581	4	0.046655	0.11075	0.993157	1921	3	-0.33296	0.9564	0.95618	0.999406	14932	0	-0.33296
FBgn0037011	4	0.046694	0.11083	0.993157	1922	2	-0.50078	0.42074	0.53197	0.993966	8819	1	-0.50078
FBgn0037896	4	0.046694	0.11083	0.993157	1923	2	-0.5936	0.81914	0.8186	0.998831	12966	0	-0.5936
FBgn0263414	4	0.046734	0.11092	0.993157	1924	3	-0.32241	0.98571	0.98571	0.999406	15393	0	-0.32241
FBgn0085464	6	0.046769	0.1308	0.993157	1925	3	-0.30612	0.85492	0.85906	0.998831	13415	1	-0.30612
FBgn0033844	6	0.046769	0.1308	0.993157	1926	2	-0.15008	0.29679	0.48741	0.993966	7235	2	-0.15008
FBgn0033953	5	0.046795	0.12155	0.993157	1927	3	-0.50588	0.99074	0.99081	0.999406	15479	0	-0.50588
FBgn0038354	6	0.046826	0.13091	0.993157	1928	3	-0.95429	0.99376	0.99377	0.999537	15532	0	-0.95429
FBgn0039194	6	0.046826	0.13091	0.993157	1929	3	-0.15941	0.58491	0.72	0.99601	10761	2	-0.15941
FBgn0034611	6	0.046826	0.13091	0.993157	1930	3	-0.26245	0.80184	0.82246	0.998831	12767	1	-0.26245
FBgn0033592	6	0.046882	0.13105	0.993157	1931	4	-0.30417	0.87084	0.87224	0.998831	13655	1	-0.30417
FBgn0053642	6	0.04694	0.13117	0.993157	1932	2	-0.21235	0.31733	0.50287	0.993966	7491	2	-0.21235
FBgn0250844	6	0.046944	0.13118	0.993157	1933	3	-0.24885	0.3314	0.51366	0.993966	7681	1	-0.24885
FBgn0087002	8	0.046974	0.14663	0.993157	1934	3	0.038342	0.072107	0.20474	0.986319	2783	4	0.038342
FBgn0003984	6	0.046977	0.13124	0.993157	1935	4	-0.21033	0.65613	0.75278	0.996319	11397	1	-0.21033
FBgn0261998	6	0.047043	0.13138	0.993157	1936	3	-0.49961	0.41595	0.57976	0.993966	8772	1	-0.49961
FBgn0029990	6	0.047053	0.13141	0.993157	1937	3	-0.16888	0.27441	0.47057	0.993966	6935	1	-0.16888
FBgn0040805	8	0.04707	0.14689	0.993157	1938	4	-0.30707	0.30534	0.5235	0.993966	7333	2	-0.30707
FBgn0017558	6	0.047108	0.13154	0.993157	1939	4	-0.39206	0.93949	0.93938	0.999406	14642	0	-0.39206
FBgn0027106	6	0.047146	0.13163	0.993157	1940	2	0.17234	0.019956	0.066628	0.986319	942	3	0.17234
FBgn0034458	6	0.047154	0.13165	0.993157	1941	2	-0.042878	0.2166	0.39598	0.993966	5880	1	-0.042878
FBgn0038494	6	0.047204	0.13177	0.993157	1942	3	-0.24784	0.49568	0.64431	0.993966	9692	2	-0.24784
FBgn0027330	6	0.047205	0.13177	0.993157	1943	3	-0.35985	0.5498	0.68973	0.993966	10364	1	-0.35985
FBgn0086698	6	0.047214	0.13179	0.993157	1944	1	0.11132	0.032289	0.097144	0.986319	1404	3	0.11132
FBgn0266709	6	0.047399	0.13223	0.993157	1945	3	-0.73356	0.27965	0.47459	0.993966	7014	2	-0.73356
FBgn0260632	8	0.047521	0.14803	0.993157	1946	1	0.1478	0.01403	0.057035	0.986319	728	4	0.1478
FBgn0015663	6	0.047543	0.13256	0.993157	1947	2	0.058482	0.15804	0.31593	0.989381	4743	3	0.058482
FBgn0027790	6	0.047557	0.1326	0.993157	1948	2	0.12959	0.1524	0.30804	0.989381	4608	2	0.12959
FBgn0267545	4	0.047601	0.11261	0.993157	1949	2	-0.27099	0.049197	0.11619	0.986319	1983	1	-0.27099
FBgn0011770	6	0.047604	0.1327	0.993157	1950	4	-0.33037	0.69446	0.76823	0.996486	11740	1	-0.33037
FBgn0035257	6	0.047604	0.1327	0.993157	1951	4	-0.57466	0.50611	0.65291	0.993966	9810	2	-0.57466
FBgn0265257	6	0.047611	0.13272	0.993157	1952	2	-0.31669	0.9135	0.91322	0.999406	14257	0	-0.31669
FBgn0053476	6	0.047611	0.13272	0.993157	1953	4	-0.19962	0.96735	0.96741	0.999406	15109	0	-0.19962
FBgn0031061	6	0.047659	0.13282	0.993157	1954	3	-0.18865	0.52086	0.66511	0.993966	10000	2	-0.18865
FBgn0265167	4	0.047709	0.11284	0.993157	1955	2	-0.27636	0.89472	0.89426	0.999406	13972	0	-0.27636
FBgn0264719	4	0.047709	0.11284	0.993157	1956	2	-0.56441	0.59796	0.63218	0.993966	10923	1	-0.56441
FBgn0038526	6	0.047796	0.13315	0.993157	1957	1	0.051223	0.37235	0.54539	0.993966	8265	2	0.051223
FBgn0038218	6	0.047823	0.13321	0.993157	1958	3	-0.34857	0.20722	0.38346	0.993966	5698	1	-0.34857
FBgn0038387	6	0.047823	0.13321	0.993157	1959	2	-0.033764	0.25651	0.4488	0.993966	6619	1	-0.033764
FBgn0025352	6	0.047823	0.13321	0.993157	1960	3	-0.28558	0.93678	0.93668	0.999406	14604	0	-0.28558
FBgn0033141	6	0.047828	0.13322	0.993157	1961	4	-0.21466	0.5859	0.72087	0.99601	10774	1	-0.21466
FBgn0259989	6	0.04792	0.13344	0.993157	1962	3	-0.15836	0.15498	0.31167	0.989381	4668	2	-0.15836
FBgn0262961	6	0.047933	0.13347	0.993157	1963	2	-0.069876	0.0021018	0.0094287	0.969686	136	2	-0.069876
FBgn0050359	6	0.047933	0.13347	0.993157	1964	1	0.37952	0.045685	0.12883	0.986319	1867	4	0.37952
FBgn0034060	4	0.048098	0.11357	0.993157	1965	3	-0.32841	0.53327	0.59228	0.993966	10164	1	-0.32841
FBgn0051469	6	0.048104	0.13388	0.993157	1966	2	0.02198	0.37684	0.54894	0.993966	8313	1	0.02198
FBgn0033734	6	0.048197	0.13409	0.993157	1967	3	-0.15511	0.44934	0.60651	0.993966	9132	1	-0.15511
FBgn0000964	6	0.048197	0.13409	0.993157	1968	3	-0.31608	0.434	0.59434	0.993966	8964	1	-0.31608
FBgn0015075	4	0.04823	0.11384	0.993157	1969	3	-0.44063	0.4126	0.52792	0.993966	8726	1	-0.44063
FBgn0039167	6	0.048237	0.13419	0.993157	1970	4	-0.33605	0.55125	0.69096	0.993966	10378	1	-0.33605
FBgn0038818	6	0.04831	0.13435	0.993157	1971	1	0.24962	0.05766	0.15617	0.986319	2294	4	0.24962
FBgn0039482	6	0.048322	0.13437	0.993157	1972	4	-0.32706	0.99127	0.99128	0.999406	15489	0	-0.32706
FBgn0264911	6	0.048381	0.13451	0.993157	1973	4	-0.22994	0.16139	0.32063	0.989381	4806	2	-0.22994
FBgn0004110	6	0.04847	0.13472	0.993157	1974	3	-0.14756	0.5315	0.67406	0.993966	10141	2	-0.14756
FBgn0030976	6	0.048485	0.13476	0.993157	1975	4	-0.35707	0.67582	0.76063	0.996486	11568	1	-0.35707
FBgn0001170	6	0.048485	0.13476	0.993157	1976	4	-0.36064	0.19334	0.36466	0.993966	5451	1	-0.36064
FBgn0035170	6	0.048515	0.13483	0.993157	1977	3	-0.27727	0.14882	0.30305	0.989381	4535	2	-0.27727
FBgn0085287	6	0.048537	0.13489	0.993157	1978	3	-0.18147	0.027526	0.085533	0.986319	1235	1	-0.18147
FBgn0038738	4	0.048579	0.11453	0.993157	1979	1	-0.26159	0.042056	0.1018	0.986319	1741	2	-0.26159
FBgn0038886	6	0.048596	0.13502	0.993157	1980	4	-0.25156	0.79698	0.81951	0.998831	12714	1	-0.25156
FBgn0040364	6	0.048743	0.13536	0.993157	1981	2	0.14425	0.075776	0.19604	0.986319	2901	3	0.14425
FBgn0028683	6	0.048815	0.13553	0.993157	1982	4	-0.30867	0.49841	0.64649	0.993966	9724	1	-0.30867
FBgn0033972	4	0.048816	0.11501	0.993157	1983	3	-0.66135	0.98821	0.98822	0.999406	15438	0	-0.66135
FBgn0038400	4	0.048816	0.11501	0.993157	1984	3	-0.77389	0.97231	0.97206	0.999406	15195	0	-0.77389
FBgn0035449	6	0.048823	0.13554	0.993157	1985	3	-0.19191	0.19306	0.36427	0.993966	5446	2	-0.19191
FBgn0040384	9	0.04883	0.15449	0.993157	1986	5	-0.29477	0.91391	0.93109	0.999406	14263	1	-0.29477
FBgn0263596	6	0.048891	0.13568	0.993157	1987	1	0.19932	0.13651	0.28584	0.989381	4290	3	0.19932
FBgn0030589	6	0.048891	0.13568	0.993157	1988	3	-0.36003	0.16628	0.32738	0.989381	4908	2	-0.36003
FBgn0265951	4	0.048896	0.11518	0.993157	1989	2	-0.054254	0.17142	0.28866	0.989381	5017	2	-0.054254
FBgn0040250	4	0.048896	0.11518	0.993157	1990	2	0.052628	0.22552	0.34976	0.992402	6052	2	0.052628
FBgn0053627	6	0.048923	0.13575	0.993157	1991	4	-0.24657	0.95191	0.95181	0.999406	14862	0	-0.24657
FBgn0031801	6	0.048973	0.13588	0.993157	1992	3	-0.2698	0.066704	0.1763	0.986319	2589	2	-0.2698
FBgn0037882	6	0.048994	0.13593	0.993157	1993	2	0.04544	0.24253	0.43048	0.993966	6377	3	0.04544
FBgn0040551	6	0.049038	0.13604	0.993157	1994	3	-0.018692	0.01206	0.045787	0.986319	648	2	-0.018692
FBgn0031913	6	0.049043	0.13605	0.993157	1995	2	-0.35072	0.33712	0.51808	0.993966	7761	2	-0.35072
FBgn0262867	6	0.049131	0.13624	0.993157	1996	1	-0.028248	0.17895	0.34502	0.992402	5156	1	-0.028248
FBgn0003139	6	0.049215	0.13642	0.993157	1997	2	-0.30309	0.1155	0.25587	0.989381	3837	2	-0.30309
FBgn0260006	5	0.049245	0.126	0.993157	1998	2	-0.010235	0.69502	0.73155	0.99601	11742	1	-0.010235
FBgn0265675	4	0.049289	0.11599	0.993157	1999	1	0.060824	0.78529	0.78472	0.996737	12600	0	0.060824
[truncated: 13,628 more rows]

## Sheet: S3B
sgrna	DMSO LFC	rapa LFC
CG8468-WGS6	0.70521	3.1701
CG8468-WGS1	0.54892	1.541
CG8468-WGS5	0.36805	3.4418
CG8468-WGS2	-0.46236	1.2606
CG8468-WGS4	0.2192	3.5107
CG8468-WGS3	0.050496	3.2118

## Sheet: S3C
sgrna	DMSO LFC	rapa LFC
CG5399-WGS6	-0.86896	2.6882
CG5399-WGS1	-1.2302	1.6327
CG5399-WGS4	-0.37213	1.0315
CG5399-WGS5	0.20218	0.67658
CG5399-WGS3	0.17264	0.73753
CG5399-WGS2	-0.049293	1.6098

## Sheet: S3D
sgrna	DMSO LFC	rapa LFC
CG9932-WGS2	1.1467	4.1599
CG9932-WGS1	0.72741	0.6424
CG9932-WGS3	0.67065	3.2732
CG9932-WGS5	0.26265	0.47551
CG9932-WGS6	-0.18193	1.5673
CG9932-WGS4	-0.023434	0.1535
