# Supplementary material for: Pooled genome-wide CRISPR activation screening for rapamycin resistance genes in Drosophila cells
Source: eLife journal article supplement (doi:10.7554/elife.85542), 2023-04-10
Supplement: fig3-data1 [file Figure 3 Source Data.xlsx]

## Sheet: 3A
	wt SAM	empty vector	sgCG5399 vector4	sgCG5399 vector6
biological rep1	0.356828	0.328385	4.49426	4.20163
biological rep2	0.728727	1.31505	4.64764	4.48338
biological rep3	0.613666	1.35657	3.26861	3.74043
Unpaired t test	wt SAM vs. empty vector		sgCG5399 vector4 vs. empty vector	sgCG5399 vector6 vs. empty vector
p value	0.2873		0.0047	0.0014

## Sheet: 3B
	wt SAM	empty vector	sgCG5399 vector4	sgCG5399 vector6
biological rep1	0.675461	0.80556	3.17573	3.8867
biological rep2	0.777029	0.780304	2.82796	3.1498
biological rep3	0.837374	1.05448	3.32903	2.58431
biological rep4	1.02662	1.35965	2.88998	2.44311
Unpaired t test	wt SAM vs. empty vector		sgCG5399 vector4 vs. empty vector	sgCG5399 vector6 vs. empty vector
p value	0.309		<0.0001	0.0013
